# Supplementary material for: The Terrestrial Carnivorous Plant Utricularia reniformis Sheds Light on Environmental and Life-Form Genome Plasticity
Source: Int J Mol Sci. 2019 Dec 18;21(1):3. doi: 10.3390/ijms21010003 (PMC6982007; doi:10.3390/ijms21010003)
Supplement: Supplementary file 1 [file ijms-21-00003-s001.zip]

Archive with 6 entries (6 files):
- Supplementary_materials.pdf
- Supplementary_tableS4.xls
- Supplementary_tableS7.xls
- Supplementary_tableS8.xls
- Supplementary_tableS9.xls
- Supplementary_tableS15.xls
