# Supplementary material for: The Terrestrial Carnivorous Plant Utricularia reniformis Sheds Light on Environmental and Life-Form Genome Plasticity
Source: Int J Mol Sci. 2019 Dec 18;21(1):3. doi: 10.3390/ijms21010003 (PMC6982007; doi:10.3390/ijms21010003)
Supplement: Supplementary file 1 [file ijms-21-00003-s001.zip › Supplementary_tableS4.xls]

## Sheet: Urenif Vs Ugibba
Query	Target	Strand	Q-len	Q-start	Q-stop	T-len	T-start	T-stop
scaffold597_size137995	Ug_unitig_0	+	137995	299	21708	8502017	1231	18965
scaffold757_size75512	Ug_unitig_0	-	75512	50847	72256	8502017	1231	18965
scaffold992_size26005	Ug_unitig_0	-	26005	1340	22749	8502017	1231	18965
scaffold1325_size8742	Ug_unitig_0	-	8742	2192	4324	8502017	21956	23117
scaffold442_size230434	Ug_unitig_0	+	230434	211284	212985	8502017	62733	64551
scaffold698_size97389	Ug_unitig_0	+	97389	7048	85166	8502017	123567	179872
scaffold1385_size7590	Ug_unitig_0	-	7590	4403	4904	8502017	209262	209763
scaffold549_size164026	Ug_unitig_0	-	164026	37625	46910	8502017	221938	230407
scaffold993_size26001	Ug_unitig_0	+	26001	24417	25314	8502017	229483	230407
scaffold1593_size4461	Ug_unitig_0	-	4461	687	1584	8502017	229483	230407
scaffold139_size577731	Ug_unitig_0	+	577731	7092	138151	8502017	185486	6443714
scaffold427_size242665	Ug_unitig_0	+	242665	28258	235058	8502017	89667	1615616
scaffold1035_size22867	Ug_unitig_0	+	22867	9945	22556	8502017	429304	439762
scaffold665_size111511	Ug_unitig_0	+	111511	96421	110889	8502017	449282	457453
scaffold725_size88532	Ug_unitig_0	-	88532	29788	87674	8502017	341123	772745
scaffold400_size262257	Ug_unitig_0	+	262257	14395	220730	8502017	252977	1579019
scaffold976_size27186	Ug_unitig_0	-	27186	1253	21118	8502017	477111	8368612
scaffold1125_size16441	Ug_unitig_0	+	16441	1253	15058	8502017	477111	487991
scaffold494_size199745	Ug_unitig_0	+	199745	43310	165954	8502017	52939	6579853
scaffold347_size306357	Ug_unitig_0	+	306357	211770	305925	8502017	482458	643308
scaffold1410_size7102	Ug_unitig_0	-	7102	738	1557	8502017	509164	509916
scaffold769_size71344	Ug_unitig_0	-	71344	1148	69961	8502017	482458	3393041
scaffold476_size209410	Ug_unitig_0	+	209410	67993	86887	8502017	556679	576699
scaffold11_size1489916	Ug_unitig_0	+	1489916	477	1431867	8502017	188150	7330075
scaffold316_size337115	Ug_unitig_0	+	337115	74923	123424	8502017	608340	6579853
scaffold92_size718879	Ug_unitig_0	+	718879	407385	663036	8502017	456210	8368612
scaffold1612_size4029	Ug_unitig_0	-	4029	124	3927	8502017	737252	741957
scaffold223_size435064	Ug_unitig_0	+	435064	348001	385318	8502017	735053	765995
scaffold326_size324086	Ug_unitig_0	+	324086	42389	253501	8502017	94072	1100136
scaffold983_size26740	Ug_unitig_0	-	26740	1105	4187	8502017	763639	766647
scaffold271_size370178	Ug_unitig_0	+	370178	320570	328358	8502017	861756	868829
scaffold817_size56666	Ug_unitig_0	-	56666	14278	30750	8502017	882362	1015391
scaffold957_size29101	Ug_unitig_0	-	29101	6159	18828	8502017	882362	895180
scaffold420_size247594	Ug_unitig_0	+	247594	44545	61524	8502017	889289	899847
scaffold554_size161974	Ug_unitig_0	+	161974	20894	145166	8502017	429772	6510824
scaffold20_size1366081	Ug_unitig_0	+	1366081	327291	952137	8502017	793981	4766473
scaffold71_size832853	Ug_unitig_0	+	832853	185736	832757	8502017	122937	3260220
scaffold1_size1862935	Ug_unitig_0	+	1862935	72959	1653289	8502017	34092	7700757
scaffold304_size344087	Ug_unitig_0	+	344087	43012	342777	8502017	889289	4399853
scaffold7_size1580086	Ug_unitig_0	+	1580086	484017	1479083	8502017	637217	3260220
scaffold834_size52220	Ug_unitig_0	+	52220	18124	24220	8502017	1091149	1097768
scaffold1471_size6194	Ug_unitig_0	-	6194	2716	4744	8502017	1122601	1124692
scaffold1472_size6193	Ug_unitig_0	-	6193	2715	4743	8502017	1122601	1124692
scaffold252_size390766	Ug_unitig_0	+	390766	1793	33539	8502017	1134928	1153392
scaffold1443_size6691	Ug_unitig_0	+	6691	904	1426	8502017	1190332	1190863
scaffold852_size47091	Ug_unitig_0	+	47091	34861	35338	8502017	1193922	1194399
scaffold1241_size10950	Ug_unitig_0	+	10950	2470	3490	8502017	1235598	1236630
scaffold629_size126420	Ug_unitig_0	+	126420	22273	24616	8502017	1263778	1265732
scaffold166_size521459	Ug_unitig_0	+	521459	327984	520715	8502017	1235453	1410695
scaffold346_size309305	Ug_unitig_0	+	309305	98355	103136	8502017	1286676	1290890
scaffold93_size714796	Ug_unitig_0	+	714796	31353	506621	8502017	1286676	3843937
scaffold1239_size10982	Ug_unitig_0	-	10982	744	10975	8502017	1353330	1364766
scaffold999_size25422	Ug_unitig_0	+	25422	10573	24050	8502017	1353330	1579019
scaffold669_size110238	Ug_unitig_0	+	110238	34012	73888	8502017	1364703	1401219
scaffold802_size60760	Ug_unitig_0	+	60760	6667	13495	8502017	1395473	1401219
scaffold416_size249014	Ug_unitig_0	+	249014	48504	71217	8502017	1416309	1451021
scaffold1212_size12016	Ug_unitig_0	-	12016	1003	3671	8502017	1440992	1441482
scaffold1360_size8115	Ug_unitig_0	+	8115	5503	5704	8502017	1464150	1464354
scaffold146_size566370	Ug_unitig_0	+	566370	277657	473277	8502017	1166139	1880849
scaffold924_size33884	Ug_unitig_0	+	33884	21232	32751	8502017	958895	1622482
scaffold300_size346845	Ug_unitig_0	+	346845	12070	218502	8502017	1464150	6322336
scaffold1157_size14928	Ug_unitig_0	+	14928	1061	1796	8502017	1582335	1582969
scaffold452_size225145	Ug_unitig_0	+	225145	29278	171093	8502017	333422	2389400
scaffold278_size365576	Ug_unitig_0	+	365576	1793	341442	8502017	1145451	3092829
scaffold598_size135460	Ug_unitig_0	-	135460	51660	134267	8502017	1735880	1854163
scaffold209_size449185	Ug_unitig_0	+	449185	194491	413043	8502017	1260960	1903833
scaffold158_size541355	Ug_unitig_0	+	541355	501419	527692	8502017	1797775	1895596
scaffold1086_size18182	Ug_unitig_0	-	18182	11504	18113	8502017	1843411	1850296
scaffold224_size434566	Ug_unitig_0	+	434566	246938	416258	8502017	34092	3455265
scaffold600_size134883	Ug_unitig_0	+	134883	24998	83027	8502017	1795936	1888817
scaffold569_size149915	Ug_unitig_0	+	149915	2989	112597	8502017	1654803	1942370
scaffold1405_size7196	Ug_unitig_0	-	7196	703	2457	8502017	1940554	1942370
scaffold280_size365250	Ug_unitig_0	+	365250	323780	332362	8502017	1945624	1954228
scaffold1265_size10345	Ug_unitig_0	-	10345	3872	5037	8502017	1986107	1987408
scaffold1378_size7773	Ug_unitig_0	+	7773	351	5580	8502017	2010938	2021524
scaffold498_size197487	Ug_unitig_0	+	197487	12392	164676	8502017	1986064	2240752
scaffold150_size559803	Ug_unitig_0	+	559803	290947	506378	8502017	128297	5678963
scaffold29_size1161289	Ug_unitig_0	+	1161289	2768	1161140	8502017	1925858	7995800
scaffold1705_size1996	Ug_unitig_0	+	1996	311	661	8502017	2178145	2178511
scaffold98_size696804	Ug_unitig_0	+	696804	137422	532453	8502017	559103	8036354
scaffold755_size76505	Ug_unitig_0	+	76505	28336	42575	8502017	2340291	2408402
scaffold814_size57385	Ug_unitig_0	+	57385	44655	46489	8502017	2419501	2421335
scaffold228_size428413	Ug_unitig_0	+	428413	403521	407307	8502017	2473873	2477696
scaffold100_size686073	Ug_unitig_0	+	686073	18672	602744	8502017	34092	7472768
scaffold48_size992202	Ug_unitig_0	+	992202	256852	531601	8502017	492697	2683611
scaffold1010_size24771	Ug_unitig_0	+	24771	13643	24527	8502017	2520875	2530338
scaffold887_size41067	Ug_unitig_0	+	41067	16735	28072	8502017	2520464	2542961
scaffold391_size273082	Ug_unitig_0	+	273082	89	99545	8502017	2520464	7100569
scaffold1134_size15918	Ug_unitig_0	+	15918	9223	10756	8502017	2608178	2610183
scaffold701_size95458	Ug_unitig_0	-	95458	852	41127	8502017	1268179	2713236
scaffold1401_size7223	Ug_unitig_0	-	7223	80	2980	8502017	2651983	2655196
scaffold1012_size24664	Ug_unitig_0	-	24664	7515	13384	8502017	2807965	2826172
scaffold229_size422993	Ug_unitig_0	+	422993	98347	337416	8502017	2423371	6649243
scaffold61_size863762	Ug_unitig_0	+	863762	73627	863175	8502017	518243	3817164
scaffold837_size51679	Ug_unitig_0	+	51679	35	49676	8502017	2863794	2897791
scaffold532_size179252	Ug_unitig_0	+	179252	37634	161119	8502017	2841656	2942944
scaffold412_size250143	Ug_unitig_0	+	250143	19704	225834	8502017	962307	2993943
scaffold370_size285785	Ug_unitig_0	+	285785	237309	267552	8502017	2989876	3010539
scaffold1367_size7991	Ug_unitig_0	-	7991	144	2273	8502017	2999727	3001671
scaffold830_size53621	Ug_unitig_0	-	53621	46307	53538	8502017	3025766	3029868
scaffold320_size333601	Ug_unitig_0	+	333601	9816	295189	8502017	962307	3106179
scaffold686_size102709	Ug_unitig_0	+	102709	10249	20840	8502017	808817	3359108
scaffold639_size122514	Ug_unitig_0	+	122514	16685	99129	8502017	1623752	3116635
scaffold719_size90700	Ug_unitig_0	+	90700	25544	45928	8502017	3104332	3116635
scaffold1078_size19161	Ug_unitig_0	+	19161	13991	14894	8502017	3148590	3149717
scaffold1598_size4395	Ug_unitig_0	+	4395	2904	4119	8502017	3180539	3181881
scaffold959_size28777	Ug_unitig_0	+	28777	10300	10567	8502017	3221792	3222070
scaffold133_size591675	Ug_unitig_0	+	591675	2900	458957	8502017	2926275	8004034
scaffold161_size531985	Ug_unitig_0	+	531985	25819	515132	8502017	1508419	8021217
scaffold244_size401050	Ug_unitig_0	+	401050	56485	373480	8502017	880142	3927001
scaffold239_size408147	Ug_unitig_0	+	408147	252620	334094	8502017	3368790	3424249
scaffold1419_size7013	Ug_unitig_0	-	7013	2731	6886	8502017	3456511	3458770
scaffold109_size652032	Ug_unitig_0	+	652032	95552	236773	8502017	1844063	7823540
scaffold502_size196668	Ug_unitig_0	-	196668	18243	188527	8502017	3442833	4206630
scaffold398_size264306	Ug_unitig_0	+	264306	815	264253	8502017	3409798	6228293
scaffold1567_size5090	Ug_unitig_0	+	5090	2060	2611	8502017	3541393	3541941
scaffold776_size68812	Ug_unitig_0	+	68812	9896	58988	8502017	3467705	4203276
scaffold1297_size9464	Ug_unitig_0	+	9464	743	939	8502017	3586492	3586688
scaffold37_size1057303	Ug_unitig_0	+	1057303	54536	986529	8502017	2015220	8266902
scaffold608_size133036	Ug_unitig_0	+	133036	27997	119426	8502017	3776999	3794323
scaffold953_size29972	Ug_unitig_0	+	29972	7451	24537	8502017	3782137	3794130
scaffold880_size42587	Ug_unitig_0	+	42587	5875	21907	8502017	3790312	3808122
scaffold96_size698077	Ug_unitig_0	+	698077	234874	604251	8502017	2827627	8148197
scaffold116_size639307	Ug_unitig_0	+	639307	14749	615569	8502017	2697677	7858655
scaffold3_size1784162	Ug_unitig_0	+	1784162	31145	1063992	8502017	2323269	8140684
scaffold317_size334483	Ug_unitig_0	-	334483	41763	308928	8502017	3776205	7626712
scaffold1463_size6315	Ug_unitig_0	+	6315	3892	3989	8502017	4701018	4701115
scaffold875_size43210	Ug_unitig_0	+	43210	5977	14942	8502017	4994393	7979219
scaffold122_size611765	Ug_unitig_0	+	611765	24783	582420	8502017	1984889	7859506
scaffold152_size557608	Ug_unitig_0	+	557608	20625	222308	8502017	1024969	6444126
scaffold259_size384786	Ug_unitig_0	+	384786	131974	330916	8502017	4407597	7956062
scaffold1458_size6461	Ug_unitig_0	+	6461	1748	2625	8502017	5447494	5448537
scaffold397_size264925	Ug_unitig_0	+	264925	20601	189569	8502017	1224381	6715816
scaffold525_size182403	Ug_unitig_0	+	182403	7847	179536	8502017	793990	6999901
scaffold741_size80477	Ug_unitig_0	+	80477	35418	74584	8502017	5333362	5858868
scaffold327_size324060	Ug_unitig_0	+	324060	28	179078	8502017	5647807	7028255
scaffold877_size42937	Ug_unitig_0	+	42937	7596	8733	8502017	5917575	5918876
scaffold292_size352950	Ug_unitig_0	+	352950	193907	351745	8502017	3830130	8170071
scaffold176_size503880	Ug_unitig_0	+	503880	58621	401392	8502017	948430	6855846
scaffold515_size186375	Ug_unitig_0	+	186375	11993	63156	8502017	3842342	6942567
scaffold721_size90222	Ug_unitig_0	+	90222	52637	66106	8502017	6553834	6631023
scaffold156_size543371	Ug_unitig_0	+	543371	453052	495939	8502017	6550669	6655513
scaffold1725_size1721	Ug_unitig_0	-	1721	294	514	8502017	6832280	6832494
scaffold958_size29003	Ug_unitig_0	+	29003	17504	18580	8502017	6853449	6854518
scaffold934_size31994	Ug_unitig_0	+	31994	26289	26882	8502017	6981966	6982574
scaffold247_size396517	Ug_unitig_0	+	396517	88	311644	8502017	6930382	7978712
scaffold81_size768935	Ug_unitig_0	+	768935	354431	735517	8502017	2427852	8159887
scaffold694_size97836	Ug_unitig_0	-	97836	67735	72767	8502017	7062741	7068031
scaffold324_size324465	Ug_unitig_0	+	324465	17515	245421	8502017	633046	7162539
scaffold829_size53678	Ug_unitig_0	+	53678	5010	49913	8502017	7105581	7140943
scaffold671_size110097	Ug_unitig_0	-	110097	88487	109291	8502017	7208609	7230135
scaffold1156_size14945	Ug_unitig_0	-	14945	5262	12329	8502017	7250807	7258084
scaffold297_size348767	Ug_unitig_0	+	348767	5960	227214	8502017	4767493	7863359
scaffold794_size63128	Ug_unitig_0	+	63128	51028	51463	8502017	7360904	7361372
scaffold677_size107734	Ug_unitig_0	+	107734	16067	30284	8502017	7349103	7414980
scaffold718_size90744	Ug_unitig_0	+	90744	10075	83191	8502017	7510903	7578292
scaffold860_size45686	Ug_unitig_0	+	45686	1604	41376	8502017	7542537	7578292
scaffold859_size45766	Ug_unitig_0	+	45766	1604	41456	8502017	7542537	7578292
scaffold541_size172255	Ug_unitig_0	+	172255	35023	114378	8502017	7572276	8501797
scaffold820_size56079	Ug_unitig_0	+	56079	2058	55500	8502017	7465602	8261453
scaffold38_size1053794	Ug_unitig_0	+	1053794	501122	1051986	8502017	1320210	7674105
scaffold181_size493926	Ug_unitig_0	+	493926	72986	152483	8502017	4907099	7823877
scaffold704_size94736	Ug_unitig_0	-	94736	81409	91567	8502017	7762075	7772674
scaffold474_size210406	Ug_unitig_0	+	210406	155616	209767	8502017	7762313	7805752
scaffold1017_size24084	Ug_unitig_0	+	24084	15392	20028	8502017	7784235	7788829
scaffold52_size936991	Ug_unitig_0	+	936991	110803	579285	8502017	2559259	7826347
scaffold214_size443516	Ug_unitig_0	+	443516	226936	324725	8502017	5868078	8006303
scaffold1088_size18135	Ug_unitig_0	-	18135	3863	6386	8502017	8115730	8118317
scaffold118_size635519	Ug_unitig_0	+	635519	35412	579575	8502017	2249331	8488495
scaffold1178_size13989	Ug_unitig_0	+	13989	6405	12410	8502017	8201135	8206807
scaffold616_size128914	Ug_unitig_0	+	128914	211	104539	8502017	8068544	8481323
scaffold872_size43666	Ug_unitig_0	+	43666	10917	14899	8502017	8218165	8222011
scaffold1228_size11349	Ug_unitig_0	-	11349	385	1855	8502017	8301537	8302982
scaffold941_size30928	Ug_unitig_0	-	30928	20087	21412	8502017	8393105	8394433
scaffold362_size289980	Ug_unitig_0	+	289980	816	255001	8502017	8290651	8488865
scaffold1361_size8112	Ug_unitig_102	+	8112	5461	5539	24963	15558	15636
scaffold433_size237148	Ug_unitig_21	+	237148	152107	154035	3145730	10196	12215
scaffold556_size159941	Ug_unitig_21	+	159941	124969	127645	3145730	67892	70763
scaffold194_size468989	Ug_unitig_21	+	468989	95313	97225	3145730	207580	209498
scaffold1386_size7581	Ug_unitig_21	+	7581	4100	5797	3145730	270187	271896
scaffold714_size91440	Ug_unitig_21	+	91440	66054	67829	3145730	270187	271975
scaffold367_size287238	Ug_unitig_21	+	287238	139195	280492	3145730	76717	395842
scaffold445_size228148	Ug_unitig_21	+	228148	82327	88687	3145730	354625	361007
scaffold69_size841560	Ug_unitig_21	+	841560	169811	442240	3145730	107701	493161
scaffold1040_size21852	Ug_unitig_21	-	21852	2165	6167	3145730	458269	462194
scaffold1135_size15809	Ug_unitig_21	+	15809	162	325	3145730	524873	525046
scaffold1184_size13579	Ug_unitig_21	-	13579	7456	9635	3145730	585877	588077
scaffold469_size213041	Ug_unitig_21	+	213041	37423	78738	3145730	622004	638836
scaffold1131_size16070	Ug_unitig_21	-	16070	7778	12420	3145730	684111	689113
scaffold1238_size10990	Ug_unitig_21	-	10990	3682	4153	3145730	737346	737796
scaffold1226_size11374	Ug_unitig_21	+	11374	6671	6711	3145730	926903	926943
scaffold136_size581398	Ug_unitig_21	+	581398	265566	458732	3145730	931608	2960202
scaffold30_size1136906	Ug_unitig_21	+	1136906	334579	958061	3145730	7004	1131724
scaffold987_size26497	Ug_unitig_21	+	26497	4289	13206	3145730	979970	987862
scaffold1502_size5910	Ug_unitig_21	+	5910	174	778	3145730	1014557	1015251
scaffold1124_size16449	Ug_unitig_21	+	16449	6599	8171	3145730	1131400	1132917
scaffold812_size57780	Ug_unitig_21	-	57780	4800	7657	3145730	1133796	1137054
scaffold1603_size4267	Ug_unitig_21	-	4267	382	1151	3145730	1166685	1167492
scaffold272_size369917	Ug_unitig_21	+	369917	150074	238202	3145730	1219534	1289260
scaffold595_size138481	Ug_unitig_21	-	138481	73936	133608	3145730	1256964	1359289
scaffold179_size500287	Ug_unitig_21	+	500287	238620	458890	3145730	739579	1672318
scaffold19_size1367837	Ug_unitig_21	+	1367837	1087887	1159622	3145730	1387658	1408920
scaffold1414_size7087	Ug_unitig_21	-	7087	1357	5032	3145730	1423529	1424667
scaffold1065_size20386	Ug_unitig_21	-	20386	14457	20253	3145730	1453247	1458541
scaffold844_size49053	Ug_unitig_21	+	49053	7999	13964	3145730	1453987	1459525
scaffold1237_size10999	Ug_unitig_21	-	10999	604	4561	3145730	1554852	1555606
scaffold417_size248619	Ug_unitig_21	+	248619	66922	230392	3145730	1037530	2377703
scaffold500_size197362	Ug_unitig_21	+	197362	110350	131443	3145730	1664547	1672460
scaffold70_size835982	Ug_unitig_21	+	835982	153556	464689	3145730	1453247	2386925
scaffold935_size31967	Ug_unitig_21	+	31967	16303	29359	3145730	1721621	1734709
scaffold1274_size9886	Ug_unitig_21	+	9886	4106	7140	3145730	1739537	1743066
scaffold1350_size8229	Ug_unitig_21	-	8229	2449	5483	3145730	1739537	1743066
scaffold143_size572353	Ug_unitig_21	+	572353	260485	426312	3145730	1689796	1843334
scaffold796_size62676	Ug_unitig_21	-	62676	31277	61369	3145730	1769850	1841045
scaffold1450_size6616	Ug_unitig_21	-	6616	2643	5309	3145730	1838226	1841045
scaffold185_size485439	Ug_unitig_21	+	485439	3402	148620	3145730	1845995	1897179
scaffold715_size91413	Ug_unitig_21	+	91413	10070	18577	3145730	1871675	1884335
scaffold913_size36170	Ug_unitig_21	+	36170	10070	23814	3145730	1871675	1904739
scaffold328_size323540	Ug_unitig_21	-	323540	28114	164917	3145730	1838226	2147043
scaffold186_size484970	Ug_unitig_21	+	484970	4746	125314	3145730	1960523	2045385
scaffold807_size59305	Ug_unitig_21	+	59305	4746	26212	3145730	2001777	2045385
scaffold21_size1333958	Ug_unitig_21	+	1333958	930610	1310116	3145730	152191	2207616
scaffold684_size103286	Ug_unitig_21	-	103286	5885	61993	3145730	2068193	2181023
scaffold1538_size5444	Ug_unitig_21	-	5444	874	3538	3145730	2107059	2109684
scaffold359_size295461	Ug_unitig_21	+	295461	220016	234232	3145730	2170246	2206815
scaffold395_size268688	Ug_unitig_21	+	268688	5566	93252	3145730	1353581	2605844
scaffold635_size123795	Ug_unitig_21	+	123795	11715	122078	3145730	2245934	2320361
scaffold461_size219499	Ug_unitig_21	+	219499	127986	215999	3145730	2279857	2320361
scaffold22_size1326342	Ug_unitig_21	+	1326342	963	1269282	3145730	22832	2512998
scaffold1390_size7455	Ug_unitig_21	+	7455	5626	5814	3145730	2395906	2396082
scaffold1462_size6324	Ug_unitig_21	-	6324	783	3293	3145730	2451204	2453719
scaffold839_size50828	Ug_unitig_21	-	50828	10095	50677	3145730	2548038	2562676
scaffold811_size58044	Ug_unitig_21	+	58044	52731	57749	3145730	2564874	2569945
scaffold43_size1025288	Ug_unitig_21	+	1025288	94044	121278	3145730	2582593	2602580
scaffold605_size133348	Ug_unitig_22	+	133348	36681	83262	6193689	53821	60183
scaffold659_size114351	Ug_unitig_22	+	114351	13314	76838	6193689	34744	1579180
scaffold296_size349755	Ug_unitig_22	+	349755	26215	48809	6193689	374360	396391
scaffold260_size384151	Ug_unitig_22	+	384151	329324	381154	6193689	374360	4962093
scaffold827_size53893	Ug_unitig_22	+	53893	42796	43698	6193689	431050	432038
scaffold460_size220093	Ug_unitig_22	+	220093	1577	214682	6193689	402158	630681
scaffold944_size30549	Ug_unitig_22	+	30549	18800	30344	6193689	501004	509667
scaffold237_size412359	Ug_unitig_22	+	412359	28268	295825	6193689	429259	542251
scaffold667_size110899	Ug_unitig_22	-	110899	2508	49804	6193689	477154	519112
scaffold909_size36614	Ug_unitig_22	-	36614	9156	22857	6193689	532123	541655
scaffold898_size38958	Ug_unitig_22	+	38958	28784	38629	6193689	602924	613154
scaffold1087_size18152	Ug_unitig_22	+	18152	6692	11189	6193689	683180	686101
scaffold311_size339713	Ug_unitig_22	+	339713	160168	328106	6193689	712840	814171
scaffold46_size1006163	Ug_unitig_22	+	1006163	19072	771329	6193689	568021	4463927
scaffold729_size86916	Ug_unitig_22	-	86916	17193	85190	6193689	728475	792659
scaffold695_size97738	Ug_unitig_22	-	97738	60	10623	6193689	785883	793843
scaffold770_size71031	Ug_unitig_22	+	71031	35647	44072	6193689	797795	800754
scaffold1640_size3190	Ug_unitig_22	+	3190	240	1222	6193689	813772	814769
scaffold1083_size18907	Ug_unitig_22	-	18907	1085	11868	6193689	894454	914305
scaffold269_size371661	Ug_unitig_22	+	371661	15854	45419	6193689	928573	951784
scaffold692_size98101	Ug_unitig_22	-	98101	59293	84670	6193689	949660	972717
scaffold1096_size17718	Ug_unitig_22	+	17718	12357	12867	6193689	974371	974907
scaffold799_size61746	Ug_unitig_22	-	61746	1691	35122	6193689	1031057	1140306
scaffold706_size94229	Ug_unitig_22	+	94229	28560	33108	6193689	1031057	1039696
scaffold559_size158248	Ug_unitig_22	+	158248	44004	144766	6193689	1108251	4179537
scaffold497_size197723	Ug_unitig_22	+	197723	8920	12896	6193689	1137369	1141438
scaffold389_size273484	Ug_unitig_22	+	273484	25686	211799	6193689	1158884	4179537
scaffold114_size641222	Ug_unitig_22	+	641222	74624	292904	6193689	567859	5199995
scaffold55_size905835	Ug_unitig_22	+	905835	313083	495951	6193689	1032603	5727907
scaffold1217_size11707	Ug_unitig_22	+	11707	9060	9874	6193689	1278217	1279148
scaffold1138_size15732	Ug_unitig_22	+	15732	4064	9569	6193689	1303805	1305041
scaffold858_size45924	Ug_unitig_22	+	45924	20252	22127	6193689	1303867	1305242
scaffold1016_size24194	Ug_unitig_22	+	24194	40	23100	6193689	1275464	5033243
scaffold581_size142983	Ug_unitig_22	+	142983	7109	125033	6193689	1143161	3339566
scaffold5_size1651677	Ug_unitig_22	+	1651677	900708	1651650	6193689	97810	6130651
scaffold1320_size8910	Ug_unitig_22	-	8910	6354	8649	6193689	1646463	1648783
scaffold904_size37068	Ug_unitig_22	+	37068	1392	36493	6193689	1856544	2484919
scaffold215_size442783	Ug_unitig_22	+	442783	81090	212210	6193689	343798	5630509
scaffold101_size679088	Ug_unitig_22	+	679088	239371	586444	6193689	1007190	3353492
scaffold1259_size10481	Ug_unitig_22	+	10481	79	3857	6193689	2153619	2154981
scaffold691_size98172	Ug_unitig_22	+	98172	92459	98145	6193689	2132781	2164336
scaffold1150_size15268	Ug_unitig_22	-	15268	5637	9871	6193689	2161646	2229079
scaffold560_size156814	Ug_unitig_22	+	156814	8843	101433	6193689	435977	2510320
scaffold759_size74576	Ug_unitig_22	+	74576	18620	38353	6193689	1303805	5745849
scaffold236_size412999	Ug_unitig_22	+	412999	11272	211108	6193689	1833150	2481708
scaffold28_size1211183	Ug_unitig_22	+	1211183	955297	1176255	6193689	1682017	2587117
scaffold1481_size6117	Ug_unitig_22	-	6117	134	5894	6193689	2506516	2509460
scaffold1159_size14876	Ug_unitig_22	+	14876	7313	7494	6193689	2884393	2884577
scaffold747_size78364	Ug_unitig_22	-	78364	23278	26880	6193689	2958169	2962114
scaffold1182_size13653	Ug_unitig_22	+	13653	8350	8615	6193689	2964404	2964666
scaffold1413_size7090	Ug_unitig_22	+	7090	945	2370	6193689	3190368	3191856
scaffold871_size43955	Ug_unitig_22	+	43955	4557	4777	6193689	3494471	3494687
scaffold112_size645884	Ug_unitig_22	+	645884	223687	494012	6193689	776389	5846048
scaffold1449_size6619	Ug_unitig_22	-	6619	4591	6483	6193689	3979718	3981442
scaffold610_size132475	Ug_unitig_22	+	132475	22510	22787	6193689	4036727	4037001
scaffold1620_size3738	Ug_unitig_22	-	3738	2397	2923	6193689	4137986	4138513
scaffold797_size62438	Ug_unitig_22	+	62438	24365	55367	6193689	229563	5171343
scaffold349_size305835	Ug_unitig_22	+	305835	11452	234362	6193689	4145299	5290793
scaffold282_size362278	Ug_unitig_22	+	362278	3711	224681	6193689	1543054	4434579
scaffold44_size1017685	Ug_unitig_22	+	1017685	9630	846797	6193689	142343	5287710
scaffold1520_size5688	Ug_unitig_22	+	5688	43	4984	6193689	4355225	4359475
scaffold1547_size5356	Ug_unitig_22	-	5356	2743	4652	6193689	4357517	4359475
scaffold66_size848830	Ug_unitig_22	+	848830	32024	828432	6193689	4120647	5695595
scaffold580_size143028	Ug_unitig_22	+	143028	4665	71719	6193689	266383	5171343
scaffold551_size162907	Ug_unitig_22	+	162907	36	40886	6193689	1643433	4542099
scaffold381_size276415	Ug_unitig_22	+	276415	5979	142970	6193689	4389613	4493151
scaffold207_size453297	Ug_unitig_22	+	453297	118545	324328	6193689	558618	4741068
scaffold409_size254044	Ug_unitig_22	+	254044	47365	112884	6193689	4425440	4468517
scaffold846_size48087	Ug_unitig_22	+	48087	47871	48005	6193689	4447249	4447388
scaffold1149_size15309	Ug_unitig_22	+	15309	9458	11372	6193689	4481320	4482739
scaffold23_size1301348	Ug_unitig_22	+	1301348	271580	1152149	6193689	2254955	5997884
scaffold840_size50587	Ug_unitig_22	+	50587	12905	39720	6193689	4285884	4743919
scaffold99_size687872	Ug_unitig_22	+	687872	131408	505970	6193689	13534	5239325
scaffold998_size25529	Ug_unitig_22	+	25529	4169	6392	6193689	4783080	4784229
scaffold1466_size6245	Ug_unitig_22	-	6245	1155	5296	6193689	4791827	4795936
scaffold33_size1110170	Ug_unitig_22	+	1110170	623285	1098534	6193689	217082	5377695
scaffold1374_size7884	Ug_unitig_22	+	7884	336	5282	6193689	4885828	4891042
scaffold1009_size24788	Ug_unitig_22	+	24788	336	23342	6193689	4885828	4925407
scaffold1382_size7624	Ug_unitig_22	+	7624	4708	6200	6193689	4962725	4963878
scaffold1080_size18956	Ug_unitig_22	-	18956	5235	12589	6193689	4954923	4992140
scaffold869_size44510	Ug_unitig_22	+	44510	13514	15199	6193689	5033537	5033947
scaffold835_size52192	Ug_unitig_22	-	52192	12990	43136	6193689	5085926	5120454
scaffold126_size606685	Ug_unitig_22	+	606685	480958	598141	6193689	4862924	5562621
scaffold1117_size16596	Ug_unitig_22	+	16596	69	3816	6193689	5310059	5314116
scaffold140_size577704	Ug_unitig_22	+	577704	443873	480515	6193689	5315864	5329331
scaffold637_size123618	Ug_unitig_22	+	123618	12149	118836	6193689	1828003	6034177
scaffold439_size236221	Ug_unitig_22	+	236221	66255	131954	6193689	4200961	5550430
scaffold1474_size6163	Ug_unitig_22	-	6163	877	4894	6193689	5382191	5385628
scaffold1475_size6163	Ug_unitig_22	+	6163	877	4894	6193689	5382191	5385628
scaffold466_size215351	Ug_unitig_22	+	215351	147153	170569	6193689	4669126	5689623
scaffold660_size113795	Ug_unitig_22	-	113795	2913	44900	6193689	5486679	5505238
scaffold914_size35904	Ug_unitig_22	+	35904	2913	33796	6193689	5486679	5582454
scaffold547_size167002	Ug_unitig_22	+	167002	99880	109775	6193689	5656087	5661898
scaffold1365_size8052	Ug_unitig_22	+	8052	74	4133	6193689	5691983	5695595
scaffold1273_size9948	Ug_unitig_22	+	9948	1251	1588	6193689	5697304	5697654
scaffold902_size37658	Ug_unitig_22	+	37658	18417	18802	6193689	5763103	5763488
scaffold1136_size15778	Ug_unitig_22	+	15778	8505	9487	6193689	5763103	5764085
scaffold14_size1455245	Ug_unitig_22	+	1455245	52021	1265530	6193689	436312	6134060
scaffold365_size288368	Ug_unitig_22	+	288368	32064	106427	6193689	5882107	5913276
scaffold1127_size16359	Ug_unitig_22	+	16359	970	11577	6193689	6020436	6034177
scaffold443_size229734	Ug_unitig_22	-	229734	970	181704	6193689	4577872	6188153
scaffold419_size248360	Ug_unitig_22	+	248360	148067	238794	6193689	6027155	6083215
scaffold270_size371520	Ug_unitig_22	+	371520	94217	99220	6193689	6107125	6111860
scaffold537_size174685	Ug_unitig_22	+	174685	129965	145931	6193689	6164017	6172338
scaffold1288_size9597	Ug_unitig_23	+	9597	16	192	35972	845	1021
scaffold473_size210511	Ug_unitig_26	+	210511	21071	27866	5347415	114171	120522
scaffold585_size141312	Ug_unitig_26	-	141312	59787	66582	5347415	114171	120522
scaffold484_size203314	Ug_unitig_26	+	203314	76203	79404	5347415	125713	128531
scaffold1665_size2613	Ug_unitig_26	+	2613	1945	2187	5347415	294859	295129
scaffold919_size34446	Ug_unitig_26	+	34446	1277	28410	5347415	307509	355677
scaffold523_size183550	Ug_unitig_26	-	183550	89126	177105	5347415	307509	386301
scaffold170_size519258	Ug_unitig_26	+	519258	7037	253635	5347415	307509	376457
scaffold907_size36840	Ug_unitig_26	+	36840	16079	24990	5347415	395388	411025
scaffold1314_size9040	Ug_unitig_26	-	9040	5161	5770	5347415	468771	469367
scaffold1147_size15341	Ug_unitig_26	+	15341	1537	6929	5347415	473271	475536
scaffold1542_size5399	Ug_unitig_26	-	5399	1855	4008	5347415	582320	584359
scaffold1126_size16433	Ug_unitig_26	+	16433	5392	15458	5347415	574075	586592
scaffold1278_size9822	Ug_unitig_26	-	9822	2238	8611	5347415	621847	627933
scaffold773_size69822	Ug_unitig_26	+	69822	30645	58961	5347415	634269	704153
scaffold18_size1404391	Ug_unitig_26	+	1404391	138275	774883	5347415	468771	1268645
scaffold1563_size5169	Ug_unitig_26	+	5169	1268	5153	5347415	665379	667639
scaffold1110_size16795	Ug_unitig_26	-	16795	7997	9321	5347415	720319	721694
scaffold1388_size7492	Ug_unitig_26	+	7492	1002	6007	5347415	783669	785105
scaffold672_size109657	Ug_unitig_26	+	109657	52017	77823	5347415	941802	962316
scaffold1465_size6264	Ug_unitig_26	-	6264	708	3394	5347415	959748	962316
scaffold1491_size5989	Ug_unitig_26	-	5989	708	3394	5347415	959748	962316
scaffold1495_size5945	Ug_unitig_26	+	5945	708	3394	5347415	959748	962316
scaffold385_size274724	Ug_unitig_26	+	274724	226747	229405	5347415	959740	962421
scaffold274_size368324	Ug_unitig_26	+	368324	71449	187892	5347415	988430	1016649
scaffold333_size321185	Ug_unitig_26	+	321185	611	90999	5347415	932731	1083004
scaffold319_size334000	Ug_unitig_26	+	334000	6061	19506	5347415	1032232	1044700
scaffold681_size104346	Ug_unitig_26	+	104346	6061	19506	5347415	1032232	1044700
scaffold572_size148818	Ug_unitig_26	+	148818	295	132138	5347415	1030394	2368068
scaffold787_size64947	Ug_unitig_26	+	64947	515	17879	5347415	1060237	1089400
scaffold163_size528813	Ug_unitig_26	+	528813	99	323689	5347415	473271	4583867
scaffold1313_size9089	Ug_unitig_26	+	9089	2278	4594	5347415	1109873	1111924
scaffold631_size125893	Ug_unitig_26	+	125893	3600	85763	5347415	911926	3716871
scaffold531_size179314	Ug_unitig_26	+	179314	227	20264	5347415	1129582	1435268
scaffold1071_size19467	Ug_unitig_26	+	19467	5964	6507	5347415	1221572	1222115
scaffold1164_size14719	Ug_unitig_26	-	14719	674	8611	5347415	1211529	1351896
scaffold168_size520293	Ug_unitig_26	+	520293	81402	520194	5347415	528918	4583084
scaffold396_size267761	Ug_unitig_26	+	267761	41496	83513	5347415	1401521	4583742
scaffold1795_size1219	Ug_unitig_26	+	1219	137	522	5347415	1553387	1553765
scaffold1235_size11157	Ug_unitig_26	-	11157	515	4525	5347415	1566904	1570914
scaffold1299_size9417	Ug_unitig_26	+	9417	5050	6129	5347415	1593152	1594257
scaffold226_size429880	Ug_unitig_26	+	429880	70277	122952	5347415	1647725	1684417
scaffold27_size1214473	Ug_unitig_26	+	1214473	473074	973361	5347415	454739	3282092
scaffold978_size26980	Ug_unitig_26	-	26980	22391	24624	5347415	1722268	1724498
scaffold1206_size12357	Ug_unitig_26	-	12357	1334	9842	5347415	1735942	1743990
scaffold791_size64248	Ug_unitig_26	+	64248	16863	19214	5347415	1760052	1763097
scaffold134_size590630	Ug_unitig_26	+	590630	617	379619	5347415	1681565	3278376
scaffold197_size466181	Ug_unitig_26	+	466181	296827	461229	5347415	1735959	1909612
scaffold373_size281293	Ug_unitig_26	-	281293	8079	276204	5347415	1562866	3458896
scaffold1572_size5076	Ug_unitig_26	+	5076	3990	4313	5347415	2021828	2022154
scaffold183_size488004	Ug_unitig_26	+	488004	50848	479867	5347415	1950409	2135494
scaffold975_size27401	Ug_unitig_26	-	27401	13818	24650	5347415	2098929	2107831
scaffold1140_size15692	Ug_unitig_26	-	15692	8137	13858	5347415	2130686	2135494
scaffold1492_size5984	Ug_unitig_26	-	5984	170	3223	5347415	2172357	2175347
scaffold568_size151327	Ug_unitig_26	+	151327	1363	3092	5347415	2229420	2231423
scaffold564_size154702	Ug_unitig_26	-	154702	18145	76868	5347415	2229420	2258749
scaffold1024_size23622	Ug_unitig_26	+	23622	3015	12910	5347415	2241857	2249807
scaffold26_size1224954	Ug_unitig_26	+	1224954	8151	331419	5347415	2181657	2337506
scaffold1343_size8385	Ug_unitig_26	+	8385	5753	8213	5347415	2380207	2382393
scaffold1155_size15020	Ug_unitig_26	+	15020	1166	11120	5347415	2019360	3366013
scaffold961_size28710	Ug_unitig_26	+	28710	5689	6171	5347415	2425463	2425986
scaffold188_size480585	Ug_unitig_26	+	480585	13625	336938	5347415	2032278	3190422
scaffold87_size752611	Ug_unitig_26	+	752611	343281	581231	5347415	2367209	2590891
scaffold1028_size23508	Ug_unitig_26	+	23508	9675	10974	5347415	2478211	2479498
scaffold543_size170649	Ug_unitig_26	+	170649	37955	73778	5347415	2488663	2532924
scaffold97_size696948	Ug_unitig_26	+	696948	48096	280947	5347415	312998	3151351
scaffold1290_size9572	Ug_unitig_26	+	9572	5864	7068	5347415	2665118	2666356
scaffold339_size318728	Ug_unitig_26	+	318728	20647	310668	5347415	2662809	3841598
scaffold1323_size8750	Ug_unitig_26	+	8750	3591	4015	5347415	2705736	2706175
scaffold302_size345264	Ug_unitig_26	+	345264	200722	344736	5347415	1808538	2812964
scaffold744_size79833	Ug_unitig_26	-	79833	36878	60010	5347415	2705306	2751644
scaffold1517_size5709	Ug_unitig_26	+	5709	57	1310	5347415	2739903	2744691
scaffold322_size332738	Ug_unitig_26	+	332738	13309	86535	5347415	2704541	3495363
scaffold516_size186372	Ug_unitig_26	+	186372	45896	186045	5347415	2435636	3679773
scaffold242_size401956	Ug_unitig_26	+	401956	24992	146259	5347415	2783983	2822377
scaffold321_size333409	Ug_unitig_26	+	333409	3379	269778	5347415	1055043	3554649
scaffold283_size361165	Ug_unitig_26	+	361165	45	291553	5347415	2803529	4962051
scaffold1161_size14844	Ug_unitig_26	-	14844	606	2329	5347415	3090747	3092555
scaffold504_size193966	Ug_unitig_26	+	193966	41200	135684	5347415	3045176	3171205
scaffold1194_size13167	Ug_unitig_26	+	13167	12722	13162	5347415	3129596	3130042
scaffold824_size54541	Ug_unitig_26	+	54541	39739	41920	5347415	3133727	3135926
scaffold491_size201213	Ug_unitig_26	+	201213	33601	38293	5347415	3149922	3154630
scaffold1168_size14613	Ug_unitig_26	+	14613	4232	5817	5347415	3163166	3164448
scaffold386_size274479	Ug_unitig_26	+	274479	113428	186773	5347415	3172578	3243628
scaffold890_size40149	Ug_unitig_26	+	40149	2853	28414	5347415	3198347	3235848
scaffold1635_size3358	Ug_unitig_26	+	3358	3025	3275	5347415	3219647	3219897
scaffold125_size608205	Ug_unitig_26	+	608205	151875	291964	5347415	2382373	3621220
scaffold1446_size6647	Ug_unitig_26	-	6647	1629	3777	5347415	3279863	3282092
scaffold390_size273192	Ug_unitig_26	+	273192	38116	45116	5347415	3302659	3309841
scaffold674_size109299	Ug_unitig_26	+	109299	33501	82812	5347415	2362775	3570442
scaffold1280_size9771	Ug_unitig_26	+	9771	4365	5225	5347415	3346791	3347681
scaffold1441_size6701	Ug_unitig_26	+	6701	688	6440	5347415	3333601	3406152
scaffold1642_size3172	Ug_unitig_26	+	3172	111	579	5347415	3470134	3470611
scaffold901_size37753	Ug_unitig_26	+	37753	9341	14569	5347415	3512594	3517893
scaffold1093_size17851	Ug_unitig_26	+	17851	15676	16467	5347415	3592718	3593526
scaffold566_size152642	Ug_unitig_26	-	152642	8079	124412	5347415	554458	3911924
scaffold266_size374472	Ug_unitig_26	+	374472	11631	296485	5347415	2709461	3981672
scaffold182_size489013	Ug_unitig_26	+	489013	96105	488974	5347415	3534723	3859307
scaffold641_size121784	Ug_unitig_26	-	121784	6183	90687	5347415	2844223	3803715
scaffold1216_size11741	Ug_unitig_26	+	11741	7585	11508	5347415	3796626	3797283
scaffold103_size665001	Ug_unitig_26	+	665001	11115	538289	5347415	1863075	3933695
scaffold1444_size6671	Ug_unitig_26	-	6671	1610	3722	5347415	3812248	3814747
scaffold688_size100103	Ug_unitig_26	+	100103	76135	97390	5347415	3812627	3849630
scaffold1112_size16760	Ug_unitig_26	+	16760	11543	11867	5347415	3911600	3911924
scaffold1305_size9280	Ug_unitig_26	-	9280	2343	5737	5347415	3938516	3940926
scaffold441_size232911	Ug_unitig_26	+	232911	120668	215168	5347415	3906063	4050041
scaffold483_size203934	Ug_unitig_26	+	203934	25096	196525	5347415	2124955	5342712
scaffold405_size257100	Ug_unitig_26	+	257100	807	88382	5347415	4048771	4161796
scaffold726_size87774	Ug_unitig_26	+	87774	81010	86967	5347415	4152483	4161796
scaffold233_size415906	Ug_unitig_26	+	415906	2396	410608	5347415	3880890	4406120
scaffold614_size131169	Ug_unitig_26	+	131169	10717	48049	5347415	4152483	4295257
scaffold1025_size23620	Ug_unitig_26	-	23620	7760	9122	5347415	4293662	4295099
scaffold786_size65005	Ug_unitig_26	+	65005	6692	64985	5347415	4397896	4554365
scaffold962_size28542	Ug_unitig_26	-	28542	25913	27462	5347415	4555640	4557150
scaffold703_size94923	Ug_unitig_26	-	94923	6692	90299	5347415	4397896	5220607
scaffold1051_size21287	Ug_unitig_26	-	21287	2875	4429	5347415	4912994	4914869
scaffold369_size285830	Ug_unitig_26	+	285830	130380	260940	5347415	4555640	5310147
scaffold972_size27793	Ug_unitig_26	-	27793	18515	23169	5347415	5215557	5220607
scaffold656_size115366	Ug_unitig_26	+	115366	80914	81538	5347415	5296882	5297462
scaffold810_size58437	Ug_unitig_26	-	58437	31021	33983	5347415	5339785	5342937
scaffold94_size713812	Ug_unitig_27	+	713812	133026	191261	2143092	82648	383179
scaffold107_size656107	Ug_unitig_27	+	656107	481619	588277	2143092	82648	384449
scaffold892_size39960	Ug_unitig_27	+	39960	47	2513	2143092	311733	314014
scaffold655_size115805	Ug_unitig_27	+	115805	28758	113905	2143092	487261	645729
scaffold454_size223947	Ug_unitig_27	+	223947	143004	214085	2143092	343920	653062
scaffold823_size54560	Ug_unitig_27	-	54560	7940	29999	2143092	640666	725158
scaffold1252_size10664	Ug_unitig_27	-	10664	8937	10102	2143092	710802	712041
scaffold587_size140297	Ug_unitig_27	+	140297	7	48408	2143092	350909	848914
scaffold1626_size3564	Ug_unitig_27	+	3564	23	167	2143092	803734	803878
scaffold436_size236557	Ug_unitig_27	+	236557	204204	206779	2143092	836245	838499
scaffold606_size133267	Ug_unitig_27	+	133267	10593	110969	2143092	841233	1363553
scaffold45_size1012159	Ug_unitig_27	+	1012159	16457	514384	2143092	79560	2031857
scaffold204_size461939	Ug_unitig_27	+	461939	65352	166964	2143092	950581	1029868
scaffold618_size128606	Ug_unitig_27	+	128606	69168	117903	2143092	971142	999699
scaffold1114_size16698	Ug_unitig_27	-	16698	8875	15971	2143092	1054782	1061644
scaffold308_size341706	Ug_unitig_27	+	341706	43932	136226	2143092	1086711	1132071
scaffold640_size121989	Ug_unitig_27	-	121989	78169	93376	2143092	1235269	1253586
scaffold1285_size9666	Ug_unitig_27	-	9666	905	5560	2143092	1242808	1253586
scaffold534_size177025	Ug_unitig_27	-	177025	110375	171890	2143092	1289143	1334836
scaffold886_size41218	Ug_unitig_27	+	41218	9452	36277	2143092	1317267	1334836
scaffold1047_size21624	Ug_unitig_27	+	21624	17741	18887	2143092	1354457	1356188
scaffold221_size436046	Ug_unitig_27	+	436046	174402	343532	2143092	1388774	1636218
scaffold1233_size11201	Ug_unitig_27	+	11201	5198	5609	2143092	1473424	1473835
scaffold1234_size11197	Ug_unitig_27	-	11197	5198	5609	2143092	1473424	1473835
scaffold120_size617610	Ug_unitig_27	+	617610	169841	461750	2143092	1054782	1996471
scaffold762_size73340	Ug_unitig_27	+	73340	42	8925	2143092	1497820	1502142
scaffold1569_size5082	Ug_unitig_27	-	5082	302	614	2143092	1504068	1504385
scaffold1573_size5057	Ug_unitig_27	-	5057	302	614	2143092	1504068	1504385
scaffold485_size203089	Ug_unitig_27	+	203089	122544	157348	2143092	1529914	1557212
scaffold1029_size23488	Ug_unitig_27	-	23488	50	17626	2143092	1583121	1675975
scaffold24_size1299124	Ug_unitig_27	+	1299124	1005581	1040282	2143092	1622883	1656583
scaffold155_size543531	Ug_unitig_27	+	543531	4744	102367	2143092	1211874	1989599
scaffold486_size202863	Ug_unitig_27	+	202863	83560	200704	2143092	1578652	1883270
scaffold191_size479834	Ug_unitig_27	+	479834	121980	140890	2143092	1804603	1831903
scaffold250_size394352	Ug_unitig_27	+	394352	242450	281521	2143092	1820036	1865167
scaffold1067_size19649	Ug_unitig_27	+	19649	13694	13931	2143092	1883020	1883270
scaffold675_size109163	Ug_unitig_27	-	109163	67827	107654	2143092	2087303	2122915
scaffold893_size39817	Ug_unitig_32	+	39817	8369	38903	3848081	209273	232916
scaffold930_size32777	Ug_unitig_32	+	32777	10359	14798	3848081	254219	257832
scaffold119_size622808	Ug_unitig_32	+	622808	2924	112445	3848081	445027	528925
scaffold899_size37830	Ug_unitig_32	-	37830	10949	18493	3848081	454317	575205
scaffold742_size80456	Ug_unitig_32	+	80456	3545	16164	3848081	637630	646560
scaffold514_size186587	Ug_unitig_32	+	186587	12429	184646	3848081	853918	903398
scaffold195_size468173	Ug_unitig_32	+	468173	81825	171280	3848081	831823	1258355
scaffold434_size237078	Ug_unitig_32	-	237078	179856	189050	3848081	1078826	1088331
scaffold200_size464826	Ug_unitig_32	+	464826	241103	456015	3848081	838832	1377728
scaffold575_size147595	Ug_unitig_32	+	147595	73816	86710	3848081	1365116	1369411
scaffold467_size213297	Ug_unitig_32	+	213297	178551	179944	3848081	1376400	1377728
scaffold734_size82491	Ug_unitig_32	+	82491	3854	6348	3848081	1471285	1473713
scaffold343_size316294	Ug_unitig_32	+	316294	58480	299146	3848081	1008709	1819181
scaffold219_size438390	Ug_unitig_32	+	438390	96037	354349	3848081	1310095	1819187
scaffold740_size80664	Ug_unitig_32	+	80664	48676	50287	3848081	1535799	1585645
scaffold65_size853472	Ug_unitig_32	+	853472	232324	769148	3848081	1079035	3524825
scaffold1283_size9704	Ug_unitig_32	-	9704	825	1724	3848081	1711948	1712888
scaffold446_size227560	Ug_unitig_32	+	227560	34755	36768	3848081	1903478	1905482
scaffold792_size63823	Ug_unitig_32	+	63823	34185	36196	3848081	1903478	1905482
scaffold394_size268910	Ug_unitig_32	+	268910	1063	136352	3848081	2315547	2633367
scaffold54_size918619	Ug_unitig_32	+	918619	275222	365872	3848081	2450207	2783604
scaffold594_size138683	Ug_unitig_32	+	138683	116	130826	3848081	2176181	3261267
scaffold1355_size8172	Ug_unitig_32	-	8172	4685	5429	3848081	2791047	2791754
scaffold1737_size1665	Ug_unitig_32	+	1665	414	1377	3848081	2949686	2950636
scaffold1657_size2745	Ug_unitig_32	+	2745	3	1069	3848081	3002816	3003873
scaffold1215_size11792	Ug_unitig_32	+	11792	10036	11465	3848081	3064238	3065577
scaffold1007_size24833	Ug_unitig_32	+	24833	2944	17654	3848081	3114764	3124444
scaffold536_size174755	Ug_unitig_32	+	174755	60757	70733	3848081	3522646	3530999
scaffold1480_size6120	Ug_unitig_32	+	6120	1102	1520	3848081	3530582	3530999
scaffold1243_size10883	Ug_unitig_32	+	10883	6657	7072	3848081	3761003	3761412
scaffold916_size35026	Ug_unitig_37	-	35026	29562	33407	3704653	39019	47604
scaffold338_size319425	Ug_unitig_37	+	319425	1985	118097	3704653	39019	154188
scaffold984_size26647	Ug_unitig_37	+	26647	16656	24662	3704653	144034	154188
scaffold83_size766868	Ug_unitig_37	+	766868	582921	702389	3704653	19986	215622
scaffold356_size297566	Ug_unitig_37	+	297566	146682	173323	3704653	203306	228862
scaffold35_size1080921	Ug_unitig_37	+	1080921	20145	777294	3704653	188289	2758336
scaffold1011_size24759	Ug_unitig_37	+	24759	3543	23798	3704653	267570	298089
scaffold805_size60286	Ug_unitig_37	+	60286	3601	28093	3704653	334190	362630
scaffold986_size26532	Ug_unitig_37	-	26532	1640	20864	3704653	393026	430562
scaffold331_size322110	Ug_unitig_37	+	322110	201605	318594	3704653	404113	508154
scaffold666_size111503	Ug_unitig_37	-	111503	49478	108891	3704653	515551	613497
scaffold440_size235831	Ug_unitig_37	+	235831	7062	155557	3704653	541883	646814
scaffold832_size52502	Ug_unitig_37	+	52502	42333	44201	3704653	651589	653287
scaffold245_size399718	Ug_unitig_37	+	399718	283219	354051	3704653	644879	708632
scaffold707_size94148	Ug_unitig_37	-	94148	43727	51121	3704653	765270	772106
scaffold493_size200783	Ug_unitig_37	+	200783	164609	197423	3704653	748971	778218
scaffold683_size103566	Ug_unitig_37	+	103566	11347	12775	3704653	814723	816070
scaffold364_size288414	Ug_unitig_37	-	288414	269408	287351	3704653	957991	987732
scaffold657_size115252	Ug_unitig_37	+	115252	4293	89993	3704653	765270	1153530
scaffold399_size263046	Ug_unitig_37	+	263046	12872	43456	3704653	941513	979586
scaffold388_size273501	Ug_unitig_37	+	273501	43211	264788	3704653	730188	1153662
scaffold64_size856543	Ug_unitig_37	+	856543	248982	265946	3704653	1039695	1054494
scaffold423_size245578	Ug_unitig_37	+	245578	107979	190994	3704653	1059771	1190956
scaffold295_size350362	Ug_unitig_37	+	350362	259122	321785	3704653	1096760	1206163
scaffold85_size755756	Ug_unitig_37	+	755756	698431	709375	3704653	1277789	1287558
scaffold1102_size17337	Ug_unitig_37	-	17337	13339	15041	3704653	1315752	1317562
scaffold144_size572261	Ug_unitig_37	+	572261	99578	572177	3704653	343969	2538003
scaffold951_size30028	Ug_unitig_37	-	30028	4328	22223	3704653	1401465	1418111
scaffold678_size107199	Ug_unitig_37	+	107199	22376	54407	3704653	1398143	1437359
scaffold366_size288142	Ug_unitig_37	-	288142	43991	268132	3704653	1507024	1663779
scaffold428_size240870	Ug_unitig_37	+	240870	45569	189280	3704653	1461445	1592365
scaffold512_size187211	Ug_unitig_37	+	187211	179962	182339	3704653	1603061	1605778
scaffold164_size528297	Ug_unitig_37	+	528297	351158	396801	3704653	1573235	1642474
scaffold943_size30680	Ug_unitig_37	+	30680	14330	23683	3704653	1614463	1643524
scaffold10_size1516488	Ug_unitig_37	+	1516488	48989	1257828	3704653	1284093	2780567
scaffold1075_size19277	Ug_unitig_37	-	19277	7580	19002	3704653	1583171	2447596
scaffold713_size91867	Ug_unitig_37	+	91867	7135	58299	3704653	1698205	1722237
scaffold705_size94633	Ug_unitig_37	-	94633	20451	42822	3704653	1797843	1815067
scaffold522_size183876	Ug_unitig_37	-	183876	9731	25361	3704653	1808243	1821893
scaffold801_size61522	Ug_unitig_37	+	61522	446	4871	3704653	1817312	1821893
scaffold1064_size20511	Ug_unitig_37	+	20511	3962	16904	3704653	1824027	1858097
scaffold368_size285942	Ug_unitig_37	+	285942	5470	67155	3704653	1797820	1931275
scaffold392_size272084	Ug_unitig_37	-	272084	190226	266614	3704653	1797820	1931275
scaffold1118_size16570	Ug_unitig_37	+	16570	13382	16209	3704653	206440	2055077
scaffold1222_size11527	Ug_unitig_37	+	11527	3256	10375	3704653	1957560	1966198
scaffold1141_size15467	Ug_unitig_37	-	15467	11302	12997	3704653	2099184	2101097
scaffold592_size138862	Ug_unitig_37	-	138862	132790	138829	3704653	2124680	2130749
scaffold189_size480584	Ug_unitig_37	+	480584	9182	133070	3704653	2124680	2236327
scaffold138_size578810	Ug_unitig_37	+	578810	159690	550151	3704653	2262691	3278039
scaffold480_size206361	Ug_unitig_37	+	206361	3756	27380	3704653	2300911	2346837
scaffold172_size512938	Ug_unitig_37	+	512938	128699	243636	3704653	2300911	2428047
scaffold313_size338943	Ug_unitig_37	+	338943	10862	129157	3704653	2237854	2475091
scaffold1250_size10749	Ug_unitig_37	+	10749	1395	8457	3704653	2459818	2475091
scaffold342_size317645	Ug_unitig_37	+	317645	15345	218371	3704653	683151	2699802
scaffold41_size1047198	Ug_unitig_37	+	1047198	356956	747650	3704653	683218	2618124
scaffold1085_size18595	Ug_unitig_37	+	18595	9249	9748	3704653	2537034	2537533
scaffold728_size87572	Ug_unitig_37	-	87572	3636	85118	3704653	2024022	2705962
scaffold763_size73130	Ug_unitig_37	+	73130	10290	12941	3704653	2613572	2618124
scaffold1317_size8987	Ug_unitig_37	+	8987	5143	6966	3704653	2961626	2962122
scaffold662_size112683	Ug_unitig_37	+	112683	86113	87568	3704653	2961626	2963013
scaffold53_size925423	Ug_unitig_37	+	925423	48839	530869	3704653	263486	3271925
scaffold1144_size15427	Ug_unitig_37	+	15427	1872	13178	3704653	3076392	3157512
scaffold920_size34415	Ug_unitig_37	-	34415	1145	4882	3704653	3213225	3217067
scaffold121_size616638	Ug_unitig_37	+	616638	50206	580997	3704653	2757088	3435718
scaffold225_size433522	Ug_unitig_37	+	433522	203035	226189	3704653	3300602	3404334
scaffold1406_size7174	Ug_unitig_37	-	7174	1972	4826	3704653	3400856	3404334
scaffold205_size458316	Ug_unitig_387	-	458316	36694	54924	66327	893	14026
scaffold764_size73013	Ug_unitig_46	-	73013	16612	21390	3405668	27454	30513
scaffold1032_size23090	Ug_unitig_46	+	23090	1700	8869	3405668	79322	103547
scaffold47_size1002735	Ug_unitig_46	+	1002735	565697	751968	3405668	10900	2053736
scaffold1476_size6158	Ug_unitig_46	-	6158	2096	6005	3405668	153392	158111
scaffold1128_size16281	Ug_unitig_46	+	16281	4035	4775	3405668	161374	162107
scaffold863_size45424	Ug_unitig_46	+	45424	13884	34527	3405668	368798	384979
scaffold462_size217632	Ug_unitig_46	+	217632	61469	156316	3405668	324755	439968
scaffold1171_size14427	Ug_unitig_46	+	14427	10036	10593	3405668	423751	424266
scaffold79_size776185	Ug_unitig_46	+	776185	6063	611841	3405668	95216	511483
scaffold1132_size15961	Ug_unitig_46	+	15961	34	2592	3405668	453526	456395
scaffold578_size145013	Ug_unitig_46	+	145013	113681	143686	3405668	510742	558373
scaffold956_size29173	Ug_unitig_46	+	29173	1532	6886	3405668	1412258	1415556
scaffold555_size160189	Ug_unitig_46	-	160189	211	5685	3405668	1469699	1475734
scaffold404_size257756	Ug_unitig_46	+	257756	124118	153862	3405668	1412258	2010253
scaffold917_size34847	Ug_unitig_46	+	34847	5185	7680	3405668	1768177	1770479
scaffold1301_size9367	Ug_unitig_46	-	9367	3290	6820	3405668	1822751	1826076
scaffold748_size78166	Ug_unitig_46	+	78166	74956	77543	3405668	1823594	1826076
scaffold1358_size8137	Ug_unitig_46	+	8137	3575	7987	3405668	1858571	1861454
scaffold806_size59925	Ug_unitig_46	+	59925	1346	10951	3405668	1867885	1964458
scaffold627_size127100	Ug_unitig_46	-	127100	9397	113215	3405668	2023934	2189764
scaffold36_size1071405	Ug_unitig_46	+	1071405	61961	195973	3405668	2023934	3027371
scaffold345_size313805	Ug_unitig_46	+	313805	47187	220653	3405668	2301524	2820804
scaffold1187_size13460	Ug_unitig_46	+	13460	2852	10140	3405668	2423892	2765658
scaffold567_size152524	Ug_unitig_46	+	152524	1329	69952	3405668	2423892	2765658
scaffold1513_size5756	Ug_unitig_46	+	5756	352	1196	3405668	2655705	2656626
scaffold62_size859589	Ug_unitig_46	+	859589	67451	314483	3405668	2589571	3240507
scaffold403_size258745	Ug_unitig_46	-	258745	71859	256547	3405668	2652802	2871065
scaffold822_size54770	Ug_unitig_46	-	54770	30602	43855	3405668	2943946	2982517
scaffold1332_size8611	Ug_unitig_46	-	8611	50	4360	3405668	3079723	3084088
scaffold680_size105388	Ug_unitig_46	+	105388	41496	56316	3405668	3185438	3213437
scaffold17_size1411551	Ug_unitig_46	+	1411551	295213	349633	3405668	2355293	3275552
scaffold15_size1429888	Ug_unitig_46	+	1429888	36312	981029	3405668	2355293	3283734
scaffold582_size142586	Ug_unitig_52	+	142586	36590	40667	3424836	524324	528311
scaffold1044_size21641	Ug_unitig_52	+	21641	18917	19372	3424836	538286	538747
scaffold42_size1040323	Ug_unitig_52	+	1040323	325234	565027	3424836	1509759	2073471
scaffold1408_size7164	Ug_unitig_52	-	7164	3203	3779	3424836	1690830	1691597
scaffold88_size749664	Ug_unitig_52	+	749664	86146	604379	3424836	1125913	1986993
scaffold51_size953629	Ug_unitig_52	+	953629	93132	487477	3424836	451824	2571279
scaffold1352_size8189	Ug_unitig_52	+	8189	4946	5116	3424836	2041206	2041376
scaffold928_size33278	Ug_unitig_52	+	33278	9578	30679	3424836	2095021	2118119
scaffold448_size226196	Ug_unitig_52	+	226196	9578	92327	3424836	2095021	2135111
scaffold760_size73572	Ug_unitig_52	+	73572	28214	34984	3424836	2154131	2160678
scaffold496_size198102	Ug_unitig_52	+	198102	165412	170790	3424836	2193767	2199374
scaffold290_size354082	Ug_unitig_52	+	354082	166708	339785	3424836	1693768	2306772
scaffold1397_size7288	Ug_unitig_52	-	7288	963	3638	3424836	2353918	2356432
scaffold258_size385168	Ug_unitig_52	+	385168	103756	112997	3424836	2384755	2393718
scaffold1165_size14718	Ug_unitig_52	-	14718	1062	2303	3424836	2412780	2414055
scaffold499_size197483	Ug_unitig_52	+	197483	98516	157768	3424836	2347483	2712770
scaffold526_size182367	Ug_unitig_52	+	182367	25406	55426	3424836	2553876	2570134
scaffold175_size507515	Ug_unitig_52	+	507515	28056	465494	3424836	1216522	2842577
scaffold630_size126236	Ug_unitig_52	+	126236	100	117401	3424836	2583353	2636705
scaffold490_size201484	Ug_unitig_52	+	201484	199059	200308	3424836	2628589	2629670
scaffold1230_size11310	Ug_unitig_52	-	11310	1226	2475	3424836	2628589	2629670
scaffold449_size226149	Ug_unitig_52	-	226149	142430	176193	3424836	2642737	2653905
scaffold517_size186048	Ug_unitig_52	+	186048	66684	73786	3424836	2686715	2693700
scaffold231_size422325	Ug_unitig_52	+	422325	175728	353232	3424836	2606638	2904200
scaffold1602_size4270	Ug_unitig_52	-	4270	500	1365	3424836	2776178	2777046
scaffold115_size639320	Ug_unitig_52	+	639320	9429	451475	3424836	1827302	3158676
scaffold821_size55444	Ug_unitig_52	+	55444	163	14249	3424836	2921352	2927413
scaffold643_size120596	Ug_unitig_52	+	120596	48106	56231	3424836	2998461	3012206
scaffold535_size176836	Ug_unitig_52	+	176836	26399	102193	3424836	2995707	3020837
scaffold1146_size15362	Ug_unitig_52	-	15362	4243	5299	3424836	3031131	3032177
scaffold831_size52652	Ug_unitig_52	-	52652	36025	38377	3424836	3037201	3039799
scaffold1534_size5505	Ug_unitig_52	-	5505	3887	5461	3424836	3056138	3057750
scaffold288_size356667	Ug_unitig_52	+	356667	12619	85785	3424836	3053384	3104709
scaffold334_size320946	Ug_unitig_52	-	320946	14091	194643	3424836	3070931	3218468
scaffold147_size561064	Ug_unitig_52	+	561064	61422	497209	3424836	2824080	3119800
scaffold1076_size19232	Ug_unitig_578	-	19232	9454	13318	3547449	66500	70437
scaffold879_size42848	Ug_unitig_578	-	42848	22690	37521	3547449	126882	2624231
scaffold129_size605804	Ug_unitig_578	+	605804	400563	599858	3547449	126882	3169673
scaffold749_size78080	Ug_unitig_578	+	78080	10517	31301	3547449	519242	823134
scaffold1143_size15444	Ug_unitig_578	-	15444	3878	15435	3547449	676969	689116
scaffold465_size216503	Ug_unitig_578	+	216503	30154	216333	3547449	475702	1031862
scaffold1139_size15707	Ug_unitig_578	+	15707	1685	13126	3547449	787861	800996
scaffold105_size659173	Ug_unitig_578	+	659173	22070	385855	3547449	346872	2286358
scaffold387_size273758	Ug_unitig_578	-	273758	244171	271440	3547449	901948	923948
scaffold1027_size23586	Ug_unitig_578	+	23586	116	9636	3547449	915394	923948
scaffold184_size485503	Ug_unitig_578	+	485503	179658	279954	3547449	1012218	1169588
scaffold809_size58674	Ug_unitig_578	+	58674	6053	53654	3547449	1026995	1141848
scaffold506_size193237	Ug_unitig_578	+	193237	22797	28080	3547449	1254276	1258504
scaffold767_size71480	Ug_unitig_578	+	71480	709	71409	3547449	514429	1361194
scaffold173_size512803	Ug_unitig_578	+	512803	191000	262762	3547449	1270141	1368247
scaffold203_size463369	Ug_unitig_578	+	463369	12720	295532	3547449	1240084	2361182
scaffold851_size47108	Ug_unitig_578	+	47108	3654	21338	3547449	1268604	2412113
scaffold141_size577029	Ug_unitig_578	+	577029	96080	133880	3547449	1431711	2703701
scaffold576_size146812	Ug_unitig_578	-	146812	134367	145892	3547449	1478664	1532525
scaffold623_size127870	Ug_unitig_578	+	127870	10860	55253	3547449	1490882	1550067
scaffold344_size316065	Ug_unitig_578	+	316065	50099	255874	3547449	174523	1620970
scaffold1050_size21304	Ug_unitig_578	-	21304	886	16109	3547449	1570601	1585711
scaffold1052_size21236	Ug_unitig_578	-	21236	886	16041	3547449	1570601	1585711
scaffold1555_size5254	Ug_unitig_578	-	5254	944	4056	3547449	1615527	1618980
scaffold1559_size5237	Ug_unitig_578	+	5237	944	4039	3547449	1615527	1618980
scaffold72_size829870	Ug_unitig_578	+	829870	83397	158314	3547449	1694378	1774968
scaffold654_size116285	Ug_unitig_578	-	116285	9726	57037	3547449	1709374	1743471
scaffold1431_size6786	Ug_unitig_578	-	6786	6391	6716	3547449	1916080	1916407
scaffold548_size165573	Ug_unitig_578	-	165573	31783	148960	3547449	1876166	1975080
scaffold1173_size14360	Ug_unitig_578	+	14360	6364	8197	3547449	2015756	2017228
scaffold900_size37806	Ug_unitig_578	+	37806	79	2361	3547449	2076740	2077822
scaffold676_size108253	Ug_unitig_578	-	108253	58121	91473	3547449	2117677	2152210
scaffold1046_size21631	Ug_unitig_578	+	21631	12963	13502	3547449	2159712	2160263
scaffold696_size97625	Ug_unitig_578	+	97625	60064	95897	3547449	2169923	2204280
scaffold479_size206789	Ug_unitig_578	-	206789	129570	194623	3547449	2171668	2204280
scaffold570_size149786	Ug_unitig_578	+	149786	23520	38585	3547449	2188107	2200539
scaffold619_size128345	Ug_unitig_578	+	128345	68721	94034	3547449	1250743	2875377
scaffold954_size29639	Ug_unitig_578	+	29639	2921	23841	3547449	1115735	2602102
scaffold625_size127502	Ug_unitig_578	+	127502	14185	101828	3547449	2444046	2943324
scaffold148_size560834	Ug_unitig_578	+	560834	139474	548807	3547449	174523	3427125
scaffold771_size70994	Ug_unitig_578	+	70994	2674	9345	3547449	2585094	2590130
scaffold153_size555728	Ug_unitig_578	+	555728	396486	438410	3547449	2624871	2645753
scaffold256_size386676	Ug_unitig_578	+	386676	277280	350103	3547449	1482865	2847711
scaffold80_size769704	Ug_unitig_578	+	769704	287849	753876	3547449	1848298	3523266
scaffold584_size141760	Ug_unitig_578	+	141760	118077	135035	3547449	2877128	2889909
scaffold883_size41640	Ug_unitig_578	+	41640	29504	31419	3547449	2929786	2931728
scaffold470_size212680	Ug_unitig_578	-	212680	97748	201481	3547449	2838513	3393736
scaffold437_size236406	Ug_unitig_578	+	236406	57343	186777	3547449	3123273	3241635
scaffold856_size46335	Ug_unitig_578	+	46335	35487	43221	3547449	3198841	3229240
scaffold291_size352991	Ug_unitig_578	+	352991	98822	149818	3547449	3230870	3304063
scaffold8_size1575602	Ug_unitig_578	+	1575602	867790	1190999	3547449	2782942	3387679
scaffold1660_size2643	Ug_unitig_578	-	2643	2374	2586	3547449	3303069	3303280
scaffold330_size322938	Ug_unitig_578	+	322938	10611	178840	3547449	3241377	3339143
scaffold453_size224172	Ug_unitig_578	+	224172	197333	199605	3547449	3442914	3445426
scaffold931_size32507	Ug_unitig_578	+	32507	5296	5867	3547449	3476928	3477506
scaffold206_size458013	Ug_unitig_578	+	458013	43500	455059	3547449	2246477	3501440
scaffold1013_size24420	Ug_unitig_578	-	24420	251	9633	3547449	3492729	3501440
scaffold960_size28733	Ug_unitig_578	+	28733	12451	12828	3547449	3528646	3529050
scaffold736_size81958	Ug_unitig_60	+	81958	75421	78138	1979591	18703	21586
scaffold825_size54338	Ug_unitig_60	+	54338	16750	35057	1979591	18703	33903
scaffold751_size77657	Ug_unitig_60	+	77657	1721	6033	1979591	105434	107880
scaffold40_size1048927	Ug_unitig_60	+	1048927	394986	578066	1979591	99333	169383
scaffold293_size352734	Ug_unitig_60	+	352734	22073	280724	1979591	83726	1308271
scaffold1100_size17457	Ug_unitig_60	+	17457	11107	13672	1979591	241085	243635
scaffold1183_size13588	Ug_unitig_60	+	13588	11237	12514	1979591	325504	326781
scaffold1256_size10580	Ug_unitig_60	-	10580	250	826	1979591	340385	341029
scaffold1123_size16487	Ug_unitig_60	+	16487	8115	10118	1979591	344039	345797
scaffold1798_size1213	Ug_unitig_60	+	1213	961	1132	1979591	420266	420437
scaffold682_size104136	Ug_unitig_60	-	104136	78898	89936	1979591	444450	454017
scaffold1008_size24807	Ug_unitig_60	-	24807	626	8945	1979591	446547	454017
scaffold1145_size15395	Ug_unitig_60	-	15395	8438	13257	1979591	516226	521078
scaffold372_size281874	Ug_unitig_60	+	281874	159933	258737	1979591	694479	743087
scaffold636_size123790	Ug_unitig_60	+	123790	15895	94258	1979591	791672	866436
scaffold573_size148756	Ug_unitig_60	-	148756	115362	123108	1979591	903730	912084
scaffold1349_size8246	Ug_unitig_60	-	8246	326	1863	1979591	948625	950358
scaffold1180_size13820	Ug_unitig_60	-	13820	8142	11786	1979591	1155699	1159303
scaffold979_size26792	Ug_unitig_60	+	26792	21125	24758	1979591	1155699	1159303
scaffold1454_size6544	Ug_unitig_60	+	6544	22	4510	1979591	1155990	1159303
scaffold1055_size21087	Ug_unitig_60	+	21087	8449	19364	1979591	1328744	1448971
scaffold1018_size24047	Ug_unitig_60	+	24047	6846	22606	1979591	1328773	1448971
scaffold947_size30245	Ug_unitig_60	-	30245	1441	21796	1979591	1328744	1463732
scaffold967_size28068	Ug_unitig_61	-	28068	22668	26188	1716415	136436	139937
scaffold1578_size5033	Ug_unitig_61	+	5033	474	3616	1716415	494971	498076
scaffold422_size246560	Ug_unitig_61	+	246560	144409	146914	1716415	615817	618455
scaffold216_size441981	Ug_unitig_61	+	441981	44292	73742	1716415	761627	779032
scaffold789_size64529	Ug_unitig_61	-	64529	36691	40546	1716415	883827	888022
scaffold645_size119521	Ug_unitig_61	+	119521	102530	105801	1716415	905760	909105
scaffold246_size398760	Ug_unitig_61	-	398760	377988	392841	1716415	1110329	1125146
scaffold788_size64895	Ug_unitig_61	-	64895	45109	59962	1716415	1110329	1125146
scaffold730_size86902	Ug_unitig_61	+	86902	4145	42498	1716415	1188951	1225922
scaffold1416_size7067	Ug_unitig_61	+	7067	2262	3164	1716415	1266682	1267475
scaffold16_size1429268	Ug_unitig_61	+	1429268	22164	165177	1716415	1409320	1486857
scaffold1177_size14133	Ug_unitig_61	+	14133	9087	13923	1716415	1457674	1465263
scaffold267_size373412	Ug_unitig_61	+	373412	84248	282698	1716415	1465204	1535471
scaffold521_size184735	Ug_unitig_61	+	184735	29618	34900	1716415	1494215	1499947
scaffold520_size185269	Ug_unitig_61	-	185269	111363	184241	1716415	1613875	1647731
scaffold76_size807220	Ug_unitig_61	+	807220	148	12670	1716415	1635214	1647731
scaffold833_size52258	Ug_unitig_61	+	52258	38709	51230	1716415	1635214	1647731
scaffold1073_size19364	Ug_unitig_61	+	19364	148	12670	1716415	1635214	1647731
scaffold854_size46396	Ug_unitig_61	+	46396	25685	31159	1716415	1664903	1669162
scaffold793_size63454	Ug_unitig_61	+	63454	41759	42474	1716415	1679005	1679764
scaffold754_size76731	Ug_unitig_61	-	76731	29307	34443	1716415	1707949	1713134
scaffold891_size40067	Ug_unitig_62	+	40067	21763	36270	2640391	178328	185703
scaffold210_size448060	Ug_unitig_62	+	448060	435757	437975	2640391	211323	213618
scaffold102_size677817	Ug_unitig_62	+	677817	585636	662677	2640391	172959	421854
scaffold1339_size8438	Ug_unitig_62	-	8438	619	7885	2640391	470490	497486
scaffold393_size271938	Ug_unitig_62	+	271938	83762	264394	2640391	264342	918021
scaffold1423_size6920	Ug_unitig_62	+	6920	1295	3362	2640391	725181	726928
scaffold13_size1475766	Ug_unitig_62	+	1475766	770179	1120202	2640391	512118	926711
scaffold128_size606351	Ug_unitig_62	+	606351	191207	571861	2640391	286502	1967221
scaffold1321_size8904	Ug_unitig_62	-	8904	2966	7406	2640391	1025299	1026868
scaffold1264_size10368	Ug_unitig_62	+	10368	505	6185	2640391	1048542	1050890
scaffold1412_size7091	Ug_unitig_62	-	7091	2207	3665	2640391	1114065	1115523
scaffold878_size42927	Ug_unitig_62	-	42927	905	24791	2640391	1114065	1138126
scaffold1586_size4565	Ug_unitig_62	-	4565	3019	4052	2640391	1137526	1138562
scaffold192_size479242	Ug_unitig_62	+	479242	24607	392922	2640391	1120063	1214793
scaffold325_size324394	Ug_unitig_62	+	324394	165142	290916	2640391	1216037	1484551
scaffold761_size73556	Ug_unitig_62	+	73556	19220	65050	2640391	1262242	1279901
scaffold348_size306083	Ug_unitig_62	+	306083	274951	303643	2640391	1347750	1410152
scaffold303_size344171	Ug_unitig_62	+	344171	28718	337608	2640391	1304717	1613837
scaffold1240_size10973	Ug_unitig_62	-	10973	2636	6159	2640391	1415458	1416710
scaffold1639_size3241	Ug_unitig_62	-	3241	471	596	2640391	1416585	1416710
scaffold609_size132898	Ug_unitig_62	+	132898	24436	110850	2640391	689596	1491122
scaffold351_size304134	Ug_unitig_62	+	304134	206999	279429	2640391	1494725	1764127
scaffold1209_size12254	Ug_unitig_62	+	12254	295	8726	2640391	1585306	1613570
scaffold939_size31099	Ug_unitig_62	+	31099	665	2041	2640391	1643818	1644762
scaffold212_size444446	Ug_unitig_62	+	444446	163564	167473	2640391	1682047	1685509
scaffold612_size132011	Ug_unitig_62	+	132011	54221	84964	2640391	1741192	1764127
scaffold1287_size9626	Ug_unitig_62	+	9626	1819	3911	2640391	1758639	1760485
scaffold281_size362804	Ug_unitig_62	+	362804	234039	258225	2640391	722670	2142360
scaffold1392_size7328	Ug_unitig_62	-	7328	2751	3401	2640391	1796096	1796787
scaffold145_size568489	Ug_unitig_62	+	568489	455758	566668	2640391	1758639	1819532
scaffold306_size343137	Ug_unitig_62	+	343137	128879	283176	2640391	1425044	2327036
scaffold284_size359695	Ug_unitig_62	+	359695	214875	352348	2640391	10468	1938679
scaffold177_size501284	Ug_unitig_62	+	501284	129809	412455	2640391	1524475	1909069
scaffold425_size243727	Ug_unitig_62	+	243727	86818	240524	2640391	1725893	1949928
scaffold843_size49361	Ug_unitig_62	-	49361	12881	20867	2640391	1979997	1983583
scaffold1092_size17866	Ug_unitig_62	-	17866	11012	14555	2640391	2036669	2041342
scaffold864_size45220	Ug_unitig_62	-	45220	9774	11430	2640391	2060243	2061884
scaffold1242_size10933	Ug_unitig_62	-	10933	8990	10646	2640391	2060243	2061884
scaffold401_size261616	Ug_unitig_62	+	261616	98592	120990	2640391	2086588	2100553
scaffold784_size65385	Ug_unitig_62	+	65385	559	2032	2640391	2122831	2124478
scaffold1510_size5781	Ug_unitig_62	+	5781	166	4279	2640391	2149638	2153690
scaffold1440_size6702	Ug_unitig_62	+	6702	61	210	2640391	2231318	2231472
scaffold1106_size16974	Ug_unitig_62	+	16974	8745	16966	2640391	2254353	2261467
scaffold154_size551747	Ug_unitig_62	+	551747	81259	159123	2640391	2254353	2296951
scaffold201_size464543	Ug_unitig_62	+	464543	23886	209055	2640391	2203578	2310281
scaffold1261_size10435	Ug_unitig_62	-	10435	5900	6292	2640391	2296573	2296951
scaffold908_size36787	Ug_unitig_62	+	36787	1111	23713	2640391	2339443	2345391
scaffold50_size963328	Ug_unitig_62	+	963328	456051	830745	2640391	2340740	2631033
scaffold91_size726399	Ug_unitig_62	+	726399	682969	716658	2640391	2558145	2597590
scaffold795_size62889	Ug_unitig_64	+	62889	264	595	39144	34225	34566
scaffold360_size294240	Ug_unitig_687	-	294240	266612	272133	21510	10371	16016
scaffold363_size289583	Ug_unitig_699	-	289583	59721	183702	3218251	764858	997378
scaffold1116_size16635	Ug_unitig_699	-	16635	5781	10340	3218251	948871	953085
scaffold942_size30811	Ug_unitig_699	+	30811	5102	19135	3218251	1169324	1179486
scaffold1324_size8748	Ug_unitig_699	-	8748	5480	6372	3218251	1226071	1226970
scaffold160_size534036	Ug_unitig_699	+	534036	118254	217403	3218251	1189309	1423494
scaffold527_size181175	Ug_unitig_699	+	181175	18005	27612	3218251	1292669	1304131
scaffold286_size357339	Ug_unitig_699	+	357339	9430	242000	3218251	1292669	2108147
scaffold430_size239863	Ug_unitig_699	+	239863	1775	148966	3218251	1290141	2310768
scaffold539_size172833	Ug_unitig_699	+	172833	135233	144157	3218251	1518468	2073855
scaffold410_size252252	Ug_unitig_699	+	252252	42208	58399	3218251	1589856	1603649
scaffold510_size188534	Ug_unitig_699	+	188534	137947	164699	3218251	1608210	1625672
scaffold1284_size9684	Ug_unitig_699	+	9684	2997	6458	3218251	1726277	1730238
scaffold457_size221634	Ug_unitig_699	+	221634	2372	188460	3218251	1776021	2833712
scaffold1122_size16511	Ug_unitig_699	-	16511	8226	14853	3218251	1777694	1902645
scaffold617_size128661	Ug_unitig_699	+	128661	30827	35940	3218251	2028593	2050148
scaffold4_size1665106	Ug_unitig_699	+	1665106	757750	774164	3218251	2076529	2099633
scaffold358_size295937	Ug_unitig_699	+	295937	77598	198620	3218251	2076529	2126154
scaffold475_size210170	Ug_unitig_699	+	210170	179005	181790	3218251	2152148	2154875
scaffold1527_size5634	Ug_unitig_699	-	5634	168	3507	3218251	2193961	2197283
scaffold1402_size7215	Ug_unitig_699	+	7215	126	1744	3218251	2223246	2224862
scaffold982_size26748	Ug_unitig_699	-	26748	15291	16742	3218251	2262579	2264015
scaffold335_size320703	Ug_unitig_699	+	320703	122219	214979	3218251	2290572	2438293
scaffold774_size69362	Ug_unitig_699	+	69362	8762	49558	3218251	2290572	2438642
scaffold382_size276227	Ug_unitig_699	+	276227	177710	182745	3218251	2502248	2507501
scaffold1133_size15929	Ug_unitig_699	-	15929	34	2776	3218251	2524689	2527368
scaffold495_size198985	Ug_unitig_699	+	198985	41339	165696	3218251	2557110	2604237
scaffold294_size351170	Ug_unitig_699	+	351170	181514	203240	3218251	2606775	2614181
scaffold314_size338820	Ug_unitig_699	+	338820	26861	290266	3218251	2556637	3173310
scaffold750_size77980	Ug_unitig_699	-	77980	3743	11521	3218251	2760179	2765737
scaffold1101_size17343	Ug_unitig_699	+	17343	7813	9906	3218251	2780539	2782895
scaffold353_size303223	Ug_unitig_699	+	303223	113845	125970	3218251	2801989	2811749
scaffold340_size317973	Ug_unitig_699	+	317973	145170	149696	3218251	2806740	2811548
scaffold67_size845796	Ug_unitig_699	+	845796	35826	647362	3218251	2243346	2883505
scaffold187_size480904	Ug_unitig_699	+	480904	395612	480085	3218251	2818245	2890995
scaffold1584_size4653	Ug_unitig_699	-	4653	2346	4612	3218251	2887132	2889064
scaffold241_size405056	Ug_unitig_699	+	405056	33695	42459	3218251	2908357	2916931
scaffold60_size871532	Ug_unitig_699	+	871532	585389	618263	3218251	2907947	2921135
scaffold1430_size6808	Ug_unitig_699	+	6808	4749	5548	3218251	2996726	2997580
scaffold243_size401479	Ug_unitig_699	+	401479	229754	400348	3218251	3004059	3093108
scaffold611_size132032	Ug_unitig_699	+	132032	312	10339	3218251	3077082	3085700
scaffold1461_size6327	Ug_unitig_699	-	6327	854	5184	3218251	3157222	3158040
scaffold458_size221370	Ug_unitig_699	+	221370	167690	219234	3218251	3170364	3215467
scaffold435_size236645	Ug_unitig_736	+	236645	186569	191740	2629907	159206	164803
scaffold896_size38970	Ug_unitig_736	-	38970	3390	20211	2629907	252843	268379
scaffold1493_size5954	Ug_unitig_736	+	5954	137	4369	2629907	439751	443668
scaffold819_size56302	Ug_unitig_736	+	56302	43511	43710	2629907	541859	542074
scaffold257_size385841	Ug_unitig_736	+	385841	11282	36174	2629907	606979	1440438
scaffold78_size780330	Ug_unitig_736	+	780330	501012	507223	2629907	698856	703854
scaffold174_size508446	Ug_unitig_736	+	508446	284284	499491	2629907	184222	1041974
scaffold268_size372821	Ug_unitig_736	-	372821	31513	146812	2629907	781307	897371
scaffold238_size410540	Ug_unitig_736	+	410540	235823	334771	2629907	926749	994112
scaffold235_size415264	Ug_unitig_736	+	415264	1656	201810	2629907	571004	2380075
scaffold1246_size10845	Ug_unitig_736	-	10845	7227	9472	2629907	1054853	1056828
scaffold781_size66705	Ug_unitig_736	-	66705	180	3395	2629907	1201453	1204751
scaffold426_size243431	Ug_unitig_736	-	243431	166618	226004	2629907	1182156	1666121
scaffold1221_size11558	Ug_unitig_736	+	11558	6920	7122	2629907	1478618	1478825
scaffold104_size664890	Ug_unitig_736	+	664890	308516	545264	2629907	606979	1960538
scaffold1518_size5697	Ug_unitig_736	+	5697	1345	3466	2629907	1921297	1923415
scaffold310_size340163	Ug_unitig_736	+	340163	70151	136513	2629907	2072183	2442251
scaffold450_size225824	Ug_unitig_744	+	225824	161851	164085	2493952	206469	208707
scaffold1353_size8179	Ug_unitig_744	+	8179	1742	5223	2493952	397436	401036
scaffold1354_size8179	Ug_unitig_744	+	8179	1742	5223	2493952	397436	401036
scaffold489_size201961	Ug_unitig_744	+	201961	85040	182528	2493952	708816	2128023
scaffold511_size188204	Ug_unitig_744	+	188204	55128	132112	2493952	1077905	1131422
scaffold938_size31207	Ug_unitig_744	+	31207	28904	30367	2493952	1264454	1265870
scaffold905_size37019	Ug_unitig_744	+	37019	15951	34919	2493952	1250059	1276665
scaffold1036_size22764	Ug_unitig_744	+	22764	3585	8215	2493952	1511693	1517105
scaffold1091_size17896	Ug_unitig_744	-	17896	202	11661	2493952	1559631	1571807
scaffold849_size47571	Ug_unitig_744	-	47571	25872	38835	2493952	1602814	1611857
scaffold2_size1816428	Ug_unitig_744	+	1816428	1144293	1564239	2493952	799549	1717976
scaffold1236_size11137	Ug_unitig_744	+	11137	893	3213	2493952	1713381	1715613
scaffold1340_size8422	Ug_unitig_744	+	8422	5533	7853	2493952	1713381	1715613
scaffold59_size887255	Ug_unitig_744	+	887255	92118	787772	2493952	77296	2315068
scaffold193_size469430	Ug_unitig_744	+	469430	14827	81172	2493952	1767028	1795031
scaffold1272_size9964	Ug_unitig_744	+	9964	7435	9102	2493952	1799352	1801224
scaffold421_size247372	Ug_unitig_744	-	247372	2214	13877	2493952	1838689	1848822
scaffold180_size499775	Ug_unitig_744	+	499775	76043	381759	2493952	874105	2290586
scaffold1061_size20708	Ug_unitig_744	-	20708	2508	10170	2493952	1915852	1920695
scaffold220_size437153	Ug_unitig_744	+	437153	151487	277884	2493952	1875318	1937822
scaffold117_size639039	Ug_unitig_744	+	639039	332267	418782	2493952	1952885	1995228
scaffold507_size192914	Ug_unitig_744	+	192914	3285	4296	2493952	2040139	2041150
scaffold341_size317742	Ug_unitig_744	+	317742	160164	271496	2493952	2228800	2232607
scaffold1459_size6420	Ug_unitig_744	+	6420	3047	4035	2493952	2314037	2315025
scaffold337_size319475	Ug_unitig_744	+	319475	148535	247752	2493952	2355983	2408251
scaffold836_size51874	Ug_unitig_744	+	51874	22477	46815	2493952	2450767	2478857
scaffold1089_size18110	Ug_unitig_72	-	18110	2597	3525	41444	30226	31283
scaffold649_size118696	Ug_unitig_746	+	118696	44907	118329	943016	51750	122713
scaffold1162_size14770	Ug_unitig_746	-	14770	221	4730	943016	118265	122713
scaffold1205_size12494	Ug_unitig_746	-	12494	221	4730	943016	118265	122713
scaffold588_size139614	Ug_unitig_746	+	139614	21125	107538	943016	139832	506031
scaffold866_size44941	Ug_unitig_746	+	44941	64	1533	943016	336508	338085
scaffold305_size343860	Ug_unitig_746	+	343860	334432	338456	943016	430244	434216
scaffold477_size208692	Ug_unitig_746	+	208692	130229	133497	943016	538153	541125
scaffold779_size67710	Ug_unitig_746	+	67710	55666	63968	943016	754552	757641
scaffold884_size41633	Ug_unitig_746	-	41633	357	20216	943016	794767	820544
scaffold652_size116608	Ug_unitig_746	+	116608	52778	66334	943016	894661	901916
scaffold848_size47649	Ug_unitig_747	-	47649	64	4077	2569514	19374	21080
scaffold853_size46902	Ug_unitig_747	-	46902	15253	46129	2569514	66089	113078
scaffold925_size33834	Ug_unitig_747	-	33834	22538	33757	2569514	89193	95973
scaffold971_size27813	Ug_unitig_747	+	27813	8045	27736	2569514	89193	95973
scaffold658_size114973	Ug_unitig_747	+	114973	31334	44958	2569514	206368	222116
scaffold815_size57204	Ug_unitig_747	+	57204	47163	55040	2569514	232834	237463
scaffold723_size89902	Ug_unitig_747	+	89902	2569	12436	2569514	250925	261896
scaffold1370_size7986	Ug_unitig_747	-	7986	3679	4081	2569514	284059	284427
scaffold1062_size20698	Ug_unitig_747	-	20698	2037	16398	2569514	280576	291436
scaffold1281_size9711	Ug_unitig_747	-	9711	1811	4909	2569514	318767	321768
scaffold429_size240638	Ug_unitig_747	+	240638	221326	228268	2569514	388818	393701
scaffold374_size280266	Ug_unitig_747	+	280266	185034	196952	2569514	410995	429407
scaffold1686_size2301	Ug_unitig_747	+	2301	1238	2232	2569514	496877	497904
scaffold1307_size9241	Ug_unitig_747	-	9241	2742	9234	2569514	494184	506158
scaffold357_size296716	Ug_unitig_747	+	296716	220780	255407	2569514	643435	651624
scaffold198_size466070	Ug_unitig_747	+	466070	80	331933	2569514	485239	2527626
scaffold1292_size9548	Ug_unitig_747	-	9548	5413	9456	2569514	704910	810365
scaffold127_size606493	Ug_unitig_747	+	606493	458886	482104	2569514	817335	855107
scaffold626_size127221	Ug_unitig_747	+	127221	14065	18569	2569514	916556	920597
scaffold758_size75365	Ug_unitig_747	+	75365	23052	52981	2569514	295530	1439634
scaffold722_size90167	Ug_unitig_747	-	90167	81664	85068	2569514	943349	946696
scaffold478_size208472	Ug_unitig_747	+	208472	882	186863	2569514	851092	1022238
scaffold538_size173939	Ug_unitig_747	+	173939	77592	104069	2569514	997640	1047566
scaffold1428_size6838	Ug_unitig_747	+	6838	5805	6605	2569514	1083637	1084568
scaffold379_size277413	Ug_unitig_747	+	277413	36621	242900	2569514	949506	1181396
scaffold1098_size17586	Ug_unitig_747	-	17586	864	15974	2569514	1105955	1155307
scaffold464_size216925	Ug_unitig_747	+	216925	3861	102444	2569514	1104418	1129975
scaffold929_size32888	Ug_unitig_747	-	32888	4042	7465	2569514	1126442	1129975
scaffold217_size439810	Ug_unitig_747	+	439810	102751	119540	2569514	1140459	1155195
scaffold196_size466988	Ug_unitig_747	+	466988	4042	136957	2569514	863331	1200695
scaffold1448_size6619	Ug_unitig_747	+	6619	1516	2667	2569514	1154024	1155329
scaffold1550_size5334	Ug_unitig_747	+	5334	231	1382	2569514	1154024	1155329
scaffold124_size609810	Ug_unitig_747	+	609810	380673	473075	2569514	863331	1191110
scaffold711_size92162	Ug_unitig_747	-	92162	51383	78843	2569514	1263348	1341260
scaffold167_size520804	Ug_unitig_747	+	520804	250540	500777	2569514	320049	1390323
scaffold542_size172077	Ug_unitig_747	+	172077	70967	119867	2569514	1284258	1470567
scaffold380_size276706	Ug_unitig_747	+	276706	116998	127967	2569514	1453724	1466447
scaffold949_size30103	Ug_unitig_747	-	30103	28831	30043	2569514	1504114	1505458
scaffold1174_size14282	Ug_unitig_747	+	14282	9415	10246	2569514	1564856	1565687
scaffold301_size346720	Ug_unitig_747	+	346720	207221	272718	2569514	1622489	1722546
scaffold89_size737138	Ug_unitig_747	+	737138	93833	622564	2569514	722639	2039177
scaffold1512_size5771	Ug_unitig_747	-	5771	1903	5271	2569514	1692063	1695937
scaffold965_size28123	Ug_unitig_747	+	28123	24406	26685	2569514	1788785	1791132
scaffold911_size36418	Ug_unitig_747	+	36418	6852	8116	2569514	1807659	1808856
scaffold90_size731574	Ug_unitig_747	+	731574	366962	375274	2569514	1843909	1851815
scaffold553_size162348	Ug_unitig_747	-	162348	117856	126168	2569514	1843909	1851815
scaffold685_size102961	Ug_unitig_747	+	102961	1646	49397	2569514	1958680	1976850
scaffold9_size1555044	Ug_unitig_747	+	1555044	1514666	1539145	2569514	2086086	2110991
scaffold596_size138122	Ug_unitig_747	-	138122	83935	109748	2569514	2080860	2113179
scaffold171_size516701	Ug_unitig_747	+	516701	158252	172051	2569514	2114728	2124565
scaffold378_size277705	Ug_unitig_747	+	277705	62383	229662	2569514	1196243	2249392
scaffold903_size37564	Ug_unitig_747	-	37564	29621	33486	2569514	2147562	2151457
scaffold1148_size15320	Ug_unitig_747	+	15320	14981	15280	2569514	2205691	2206008
scaffold352_size303969	Ug_unitig_747	+	303969	92894	242187	2569514	2133238	2258105
scaffold1684_size2315	Ug_unitig_747	-	2315	1870	2146	2569514	2270093	2270385
scaffold232_size418928	Ug_unitig_747	+	418928	244648	402925	2569514	2270119	2289496
scaffold1020_size23896	Ug_unitig_747	+	23896	6635	15992	2569514	2316534	2322912
scaffold213_size443723	Ug_unitig_747	+	443723	226275	271200	2569514	2327892	2334452
scaffold318_size334380	Ug_unitig_747	+	334380	11239	16051	2569514	2343384	2347816
scaffold312_size339379	Ug_unitig_747	+	339379	209341	242733	2569514	2393918	2416916
scaffold1142_size15455	Ug_unitig_747	+	15455	8357	12237	2569514	2518880	2525541
scaffold1179_size13919	Ug_unitig_747	+	13919	6539	10419	2569514	2518880	2525541
scaffold777_size68218	Ug_unitig_748	+	68218	642	30955	5667865	6545	80235
scaffold733_size83835	Ug_unitig_748	+	83835	57324	79156	5667865	61829	238391
scaffold57_size904867	Ug_unitig_748	+	904867	140232	861241	5667865	18518	3041870
scaffold1316_size8997	Ug_unitig_748	-	8997	1563	8992	5667865	91962	843355
scaffold1282_size9708	Ug_unitig_748	+	9708	9128	9260	5667865	144074	144206
scaffold653_size116565	Ug_unitig_748	-	116565	28651	55046	5667865	197097	211683
scaffold785_size65379	Ug_unitig_748	+	65379	13743	54808	5667865	269352	4751636
scaffold646_size119134	Ug_unitig_748	+	119134	49688	105839	5667865	133770	784213
scaffold309_size341406	Ug_unitig_748	+	341406	243497	265113	5667865	150606	5308765
scaffold579_size144847	Ug_unitig_748	+	144847	77449	142497	5667865	208315	5359499
scaffold307_size341957	Ug_unitig_748	+	341957	19804	106644	5667865	593409	4541567
scaffold1380_size7672	Ug_unitig_748	+	7672	7561	7623	5667865	642312	642374
scaffold137_size581237	Ug_unitig_748	+	581237	2125	5290	5667865	653917	657297
scaffold709_size93466	Ug_unitig_748	+	93466	82144	88818	5667865	666162	671022
scaffold377_size278145	Ug_unitig_748	+	278145	1411	31801	5667865	689238	4265083
scaffold1377_size7794	Ug_unitig_748	-	7794	2248	7782	5667865	723469	727404
scaffold289_size354729	Ug_unitig_748	+	354729	2020	117490	5667865	486850	2390832
scaffold1306_size9246	Ug_unitig_748	+	9246	303	4529	5667865	744348	748638
scaffold990_size26292	Ug_unitig_748	-	26292	12365	26148	5667865	744348	757045
scaffold63_size858018	Ug_unitig_748	+	858018	197157	781562	5667865	422946	1515952
scaffold1337_size8463	Ug_unitig_748	-	8463	1925	8291	5667865	785346	792664
scaffold261_size381946	Ug_unitig_748	+	381946	358942	380021	5667865	785346	805936
scaffold95_size706132	Ug_unitig_748	+	706132	338612	363137	5667865	820177	835774
scaffold414_size249511	Ug_unitig_748	+	249511	229443	246884	5667865	820177	835774
scaffold906_size36960	Ug_unitig_748	+	36960	17795	18096	5667865	861305	861606
scaffold1120_size16532	Ug_unitig_748	+	16532	9413	9535	5667865	978900	979022
scaffold885_size41222	Ug_unitig_748	-	41222	32191	41146	5667865	996698	1005651
scaffold647_size119004	Ug_unitig_748	+	119004	71209	118928	5667865	967134	4417079
scaffold488_size202194	Ug_unitig_748	-	202194	48134	202064	5667865	996698	1411382
scaffold1001_size25237	Ug_unitig_748	+	25237	20069	21171	5667865	1051109	1052314
scaffold1203_size12743	Ug_unitig_748	-	12743	3608	11140	5667865	1051114	1059423
scaffold1121_size16516	Ug_unitig_748	+	16516	8286	11299	5667865	1210669	1212375
scaffold544_size169404	Ug_unitig_748	+	169404	157917	162515	5667865	1318467	1323053
scaffold530_size179357	Ug_unitig_748	+	179357	23324	163249	5667865	1279376	5013130
scaffold251_size391187	Ug_unitig_748	+	391187	3577	173458	5667865	1139519	1607704
scaffold149_size559883	Ug_unitig_748	+	559883	95641	366589	5667865	566793	3141437
scaffold1253_size10626	Ug_unitig_748	-	10626	207	1686	5667865	1583575	1585054
scaffold826_size54165	Ug_unitig_748	-	54165	197	16040	5667865	1594286	1607704
scaffold1006_size24908	Ug_unitig_748	-	24908	197	16040	5667865	1594286	1607704
scaffold142_size574908	Ug_unitig_748	+	574908	164072	551126	5667865	541183	2314242
scaffold455_size221765	Ug_unitig_748	+	221765	112088	202204	5667865	1582353	1730939
scaffold132_size599623	Ug_unitig_748	+	599623	6922	11593	5667865	1891392	1896257
scaffold602_size134299	Ug_unitig_748	+	134299	39475	83695	5667865	885569	5221958
scaffold513_size186705	Ug_unitig_748	+	186705	99243	128485	5667865	2325084	2350842
scaffold1331_size8631	Ug_unitig_748	+	8631	2788	7138	5667865	2535445	2538554
scaffold113_size644116	Ug_unitig_748	+	644116	584607	593433	5667865	2643411	2652204
scaffold56_size905644	Ug_unitig_748	+	905644	854991	862899	5667865	2696796	2704857
scaffold86_size753315	Ug_unitig_748	+	753315	116	736540	5667865	1397426	4507841
scaffold75_size815677	Ug_unitig_748	+	815677	189715	795304	5667865	1257506	3859211
scaffold948_size30146	Ug_unitig_748	+	30146	4935	5114	5667865	3228996	3229175
scaffold178_size500592	Ug_unitig_748	+	500592	2386	325868	5667865	197097	5368723
scaffold768_size71420	Ug_unitig_748	+	71420	4372	5331	5667865	3392833	3393857
scaffold375_size279719	Ug_unitig_748	+	279719	46758	155833	5667865	1954665	3841040
scaffold253_size390581	Ug_unitig_748	+	390581	29101	388097	5667865	310389	4817230
scaffold255_size387927	Ug_unitig_748	+	387927	229403	366380	5667865	2919264	3727700
scaffold550_size162924	Ug_unitig_748	+	162924	95717	122037	5667865	3691156	3727700
scaffold1508_size5810	Ug_unitig_748	+	5810	2528	3940	5667865	3786090	3787455
scaffold1181_size13665	Ug_unitig_748	-	13665	10595	12261	5667865	3802862	3804543
scaffold687_size100329	Ug_unitig_748	-	100329	36594	75442	5667865	1118150	4083799
scaffold82_size768308	Ug_unitig_748	+	768308	3231	277672	5667865	4012732	4828035
scaffold1057_size21027	Ug_unitig_748	-	21027	14547	19415	5667865	4080384	4123951
scaffold1022_size23813	Ug_unitig_748	+	23813	7648	23619	5667865	4230292	4251652
scaffold73_size822997	Ug_unitig_748	+	822997	19574	575343	5667865	767809	4348589
scaffold940_size31079	Ug_unitig_748	+	31079	16328	30748	5667865	767809	4329714
scaffold651_size116853	Ug_unitig_748	-	116853	40788	110560	5667865	4350677	4429741
scaffold1294_size9512	Ug_unitig_748	+	9512	38	252	5667865	4604650	4604876
scaffold1712_size1930	Ug_unitig_748	-	1930	105	435	5667865	4615047	4615377
scaffold208_size452143	Ug_unitig_748	+	452143	11345	35276	5667865	4588625	5119249
scaffold622_size128123	Ug_unitig_748	+	128123	20560	124750	5667865	4659430	5163356
scaffold1082_size18923	Ug_unitig_748	+	18923	5885	7583	5667865	4709530	4711215
scaffold162_size531800	Ug_unitig_748	+	531800	98614	378324	5667865	2268863	4772393
scaffold613_size131457	Ug_unitig_748	+	131457	184	36708	5667865	4717028	4800742
scaffold1347_size8291	Ug_unitig_748	-	8291	1003	7223	5667865	4607079	5103675
scaffold315_size338688	Ug_unitig_748	+	338688	65282	338200	5667865	1517251	5351240
scaffold1229_size11336	Ug_unitig_748	+	11336	5988	6192	5667865	4827831	4828035
scaffold633_size124080	Ug_unitig_748	-	124080	84130	122305	5667865	4836533	5307984
scaffold889_size40203	Ug_unitig_748	+	40203	280	4224	5667865	4887342	4891560
scaffold1417_size7047	Ug_unitig_748	-	7047	1328	5272	5667865	4887342	4891560
scaffold838_size51646	Ug_unitig_748	+	51646	1982	3080	5667865	4958763	5599005
scaffold481_size205178	Ug_unitig_748	+	205178	7270	8511	5667865	5117588	5118572
scaffold593_size138782	Ug_unitig_748	+	138782	44700	45544	5667865	5241749	5242732
scaffold468_size213067	Ug_unitig_748	+	213067	89331	94984	5667865	5241749	5247561
scaffold31_size1122664	Ug_unitig_748	+	1122664	137392	983549	5667865	158565	5384640
scaffold780_size67079	Ug_unitig_748	+	67079	7180	53726	5667865	4774807	5279280
scaffold1213_size11978	Ug_unitig_748	-	11978	6541	11341	5667865	5272821	5277469
scaffold918_size34464	Ug_unitig_748	+	34464	4705	32670	5667865	5338449	5372133
scaffold857_size46234	Ug_unitig_748	+	46234	42499	43913	5667865	5423792	5425236
scaffold528_size179813	Ug_unitig_748	+	179813	32548	56041	5667865	5423965	5430933
scaffold1342_size8395	Ug_unitig_748	+	8395	960	3040	5667865	5456381	5458509
scaffold828_size53878	Ug_unitig_748	+	53878	960	53171	5667865	5456381	5497880
scaffold558_size158525	Ug_unitig_748	-	158525	20381	152143	5667865	5473614	5631856
scaffold661_size113655	Ug_unitig_748	+	113655	49425	52077	5667865	5609726	5612487
scaffold39_size1053542	Ug_unitig_748	+	1053542	189631	721129	5667865	4894701	5656074
scaffold456_size221644	Ug_unitig_748	+	221644	6382	9178	5667865	5629083	5631856
scaffold1002_size25184	Ug_unitig_748	-	25184	860	24643	5667865	5614593	5643337
scaffold227_size428916	Ug_unitig_748	+	428916	204	5419	5667865	5630396	5635633
scaffold599_size134888	Ug_unitig_748	+	134888	4542	14193	5667865	5636869	5654261
scaffold1453_size6555	Ug_unitig_749	-	6555	5159	5929	3446356	336319	337089
scaffold778_size68176	Ug_unitig_749	-	68176	544	67259	3446356	342315	439473
scaffold895_size39214	Ug_unitig_749	-	39214	30901	38297	3446356	432192	439473
scaffold816_size56846	Ug_unitig_749	-	56846	77	20542	3446356	432192	442233
scaffold287_size357018	Ug_unitig_749	+	357018	224160	313375	3446356	440372	717627
scaffold737_size81492	Ug_unitig_749	+	81492	4127	37592	3446356	629529	746858
scaffold716_size91399	Ug_unitig_749	+	91399	11371	44067	3446356	716004	749195
scaffold1053_size21173	Ug_unitig_749	-	21173	5167	10831	3446356	808023	811343
scaffold1499_size5912	Ug_unitig_749	+	5912	820	1935	3446356	861691	862717
scaffold1546_size5367	Ug_unitig_749	+	5367	278	1393	3446356	861691	862717
scaffold1503_size5883	Ug_unitig_749	-	5883	4123	4812	3446356	998294	999015
scaffold1197_size12925	Ug_unitig_749	-	12925	10699	11839	3446356	1082710	1083843
scaffold1432_size6762	Ug_unitig_749	-	6762	1740	5481	3446356	1137800	1140985
scaffold1185_size13504	Ug_unitig_749	+	13504	1740	13363	3446356	1137800	1149545
scaffold1336_size8539	Ug_unitig_749	-	8539	3304	4428	3446356	1298986	1300137
scaffold1037_size22605	Ug_unitig_749	+	22605	3675	21880	3446356	1513770	1522305
scaffold503_size196565	Ug_unitig_749	+	196565	37983	174626	3446356	1533003	1589111
scaffold1375_size7874	Ug_unitig_749	-	7874	1766	5942	3446356	1566563	1570282
scaffold690_size98446	Ug_unitig_749	-	98446	4864	67840	3446356	1599265	1802270
scaffold1048_size21377	Ug_unitig_749	+	21377	5615	6282	3446356	1750474	1751202
scaffold1090_size17948	Ug_unitig_749	-	17948	8512	9179	3446356	1750474	1751202
scaffold752_size77146	Ug_unitig_749	+	77146	17704	44037	3446356	1789360	1802270
scaffold415_size249257	Ug_unitig_749	+	249257	8602	188176	3446356	1604632	1862430
scaffold841_size49873	Ug_unitig_749	+	49873	19165	41265	3446356	1862126	1881324
scaffold1309_size9170	Ug_unitig_749	+	9170	324	1924	3446356	1917362	1919001
scaffold1310_size9169	Ug_unitig_749	+	9169	324	1924	3446356	1917362	1919001
scaffold1262_size10399	Ug_unitig_749	+	10399	26	10018	3446356	2003759	2018957
scaffold1263_size10389	Ug_unitig_749	+	10389	26	10008	3446356	2003759	2018957
scaffold509_size189280	Ug_unitig_749	-	189280	66	182923	3446356	1142335	2145336
scaffold621_size128310	Ug_unitig_749	+	128310	47229	57045	3446356	2093633	2105051
scaffold1269_size10061	Ug_unitig_749	+	10061	5394	7313	3446356	2299223	2301815
scaffold1519_size5693	Ug_unitig_749	-	5693	1586	4493	3446356	2447586	2452185
scaffold459_size221187	Ug_unitig_749	+	221187	125485	133739	3446356	2504453	2515103
scaffold743_size79864	Ug_unitig_749	-	79864	74927	79857	3446356	2512112	2516978
scaffold1004_size25060	Ug_unitig_749	+	25060	5328	24649	3446356	1059067	2942048
scaffold12_size1484567	Ug_unitig_749	+	1484567	633426	645485	3446356	2992737	3004527
scaffold1038_size22408	Ug_unitig_749	-	22408	1085	20709	3446356	2992737	3312286
scaffold248_size396238	Ug_unitig_749	+	396238	1699	333898	3446356	2992737	3355965
scaffold1496_size5945	Ug_unitig_749	+	5945	1403	2299	3446356	3014569	3015450
scaffold738_size81203	Ug_unitig_749	-	81203	9244	72101	3446356	3105171	3125633
scaffold285_size358112	Ug_unitig_749	+	358112	96396	357990	3446356	1600168	3350886
scaffold424_size243908	Ug_unitig_749	+	243908	112846	243119	3446356	2948152	3426609
scaffold870_size44295	Ug_unitig_749	+	44295	40316	42828	3446356	3167568	3170201
scaffold1033_size23071	Ug_unitig_749	-	23071	19092	21604	3446356	3167568	3170201
scaffold463_size217393	Ug_unitig_750	+	217393	37608	49285	298690	80806	90285
scaffold34_size1082081	Ug_unitig_750	+	1082081	311612	496730	298690	71859	234422
scaffold604_size133642	Ug_unitig_750	+	133642	759	17132	298690	146973	173232
scaffold679_size106169	Ug_unitig_82	+	106169	59649	62273	880676	88221	90828
scaffold218_size439493	Ug_unitig_82	+	439493	182912	187043	880676	88221	92271
scaffold638_size123451	Ug_unitig_82	+	123451	69275	71546	880676	90050	92268
scaffold111_size649699	Ug_unitig_82	+	649699	526887	605567	880676	248358	739530
scaffold264_size378400	Ug_unitig_838	-	378400	174929	184842	31457	14360	31304
scaffold673_size109591	Ug_unitig_85	+	109591	105919	108048	739299	65803	66524
scaffold472_size211008	Ug_unitig_85	+	211008	153226	166774	739299	86422	99238
scaffold408_size254463	Ug_unitig_85	+	254463	111345	183795	739299	25221	124404
scaffold1460_size6369	Ug_unitig_85	+	6369	836	5819	739299	240271	245531
scaffold1034_size22948	Ug_unitig_85	+	22948	17	3037	739299	308301	308667
scaffold277_size366222	Ug_unitig_85	+	366222	88897	132256	739299	327337	348450
scaffold670_size110176	Ug_unitig_85	+	110176	71273	108857	739299	416177	454185
scaffold1298_size9439	Ug_unitig_85	-	9439	4436	7811	739299	450578	454185
scaffold1311_size9141	Ug_unitig_85	+	9141	4447	7822	739299	450578	454185
scaffold894_size39349	Ug_unitig_85	+	39349	59	1930	739299	453462	455480
scaffold700_size95485	Ug_unitig_85	+	95485	29494	60378	739299	484097	504517
scaffold782_size66320	Ug_unitig_88	+	66320	3004	3685	700450	67357	68066
scaffold336_size320595	Ug_unitig_88	+	320595	61774	63790	700450	195260	197359
scaffold1084_size18896	Ug_unitig_88	-	18896	2477	14953	700450	211729	220704
scaffold529_size179514	Ug_unitig_88	+	179514	124653	169234	700450	227476	251849
scaffold190_size480112	Ug_unitig_88	+	480112	126348	135784	700450	271435	279488
scaffold790_size64319	Ug_unitig_88	-	64319	32001	61154	700450	288053	303059
scaffold438_size236227	Ug_unitig_88	+	236227	90065	93702	700450	334242	337579
scaffold1248_size10783	Ug_unitig_88	-	10783	2322	6844	700450	372674	377002
scaffold650_size116903	Ug_unitig_88	-	116903	83840	116475	700450	361689	415840
scaffold202_size463854	Ug_unitig_88	+	463854	5470	67814	700450	361689	448433
scaffold110_size649966	Ug_unitig_88	+	649966	319925	382026	700450	415308	489209
scaffold74_size818217	Ug_unitig_88	+	818217	26531	112311	700450	358384	552993
scaffold135_size590554	Ug_unitig_88	+	590554	519744	590267	700450	463994	526519
scaffold1119_size16554	Ug_unitig_88	+	16554	3066	3112	700450	545624	545807
scaffold712_size91892	Ug_unitig_88	+	91892	48722	85323	700450	515824	573496
scaffold165_size523336	Ug_unitig_88	+	523336	493813	516767	700450	534570	573496
scaffold798_size61987	Ug_unitig_899	+	61987	19179	54088	3453940	460206	480324
scaffold329_size323464	Ug_unitig_899	+	323464	92783	292095	3453940	405713	675216
scaffold632_size124595	Ug_unitig_899	+	124595	111203	113595	3453940	519931	521765
scaffold589_size139569	Ug_unitig_899	+	139569	132809	134702	3453940	562678	564625
scaffold724_size89489	Ug_unitig_899	+	89489	4867	6760	3453940	562678	564625
scaffold1270_size10000	Ug_unitig_899	-	10000	1102	2962	3453940	590076	592198
scaffold402_size261414	Ug_unitig_899	+	261414	202290	214889	3453940	671651	686900
scaffold717_size90790	Ug_unitig_899	-	90790	90	64151	3453940	708432	748022
scaffold783_size65617	Ug_unitig_899	-	65617	10127	13641	3453940	744154	748022
scaffold1163_size14748	Ug_unitig_899	-	14748	2619	3215	3453940	821712	822350
scaffold451_size225693	Ug_unitig_899	-	225693	15181	188985	3453940	747283	1559910
scaffold842_size49797	Ug_unitig_899	+	49797	373	10246	3453940	944608	999341
scaffold1356_size8155	Ug_unitig_899	+	8155	1582	7157	3453940	965440	995385
scaffold745_size79788	Ug_unitig_899	-	79788	762	66487	3453940	965440	1075264
scaffold1467_size6224	Ug_unitig_899	+	6224	5237	5812	3453940	1008013	1008602
scaffold910_size36566	Ug_unitig_899	+	36566	25933	31814	3453940	1008185	1013026
scaffold234_size415727	Ug_unitig_899	+	415727	168586	274308	3453940	923808	1075260
scaffold418_size248570	Ug_unitig_899	+	248570	886	245925	3453940	90383	3042265
scaffold1384_size7602	Ug_unitig_899	+	7602	3851	4975	3453940	1125463	1126713
scaffold131_size602077	Ug_unitig_899	+	602077	586489	592613	3453940	1157479	1164288
scaffold406_size255187	Ug_unitig_899	+	255187	101704	227355	3453940	1111599	1291179
scaffold254_size388685	Ug_unitig_899	+	388685	62	16455	3453940	1178900	1220295
scaffold888_size40586	Ug_unitig_899	+	40586	62	28528	3453940	1178900	1238226
scaffold991_size26200	Ug_unitig_899	-	26200	62	26135	3453940	1178900	1240095
scaffold68_size843662	Ug_unitig_899	+	843662	426944	485295	3453940	1158627	1291902
scaffold818_size56322	Ug_unitig_899	+	56322	2197	38197	3453940	1242397	1291902
scaffold850_size47126	Ug_unitig_899	+	47126	115	8188	3453940	1233132	1274697
scaffold1363_size8071	Ug_unitig_899	+	8071	388	4504	3453940	1272461	1295232
scaffold1328_size8685	Ug_unitig_899	+	8685	3901	6040	3453940	1333608	1335534
scaffold1279_size9773	Ug_unitig_899	+	9773	3901	9635	3453940	1333608	1338449
scaffold265_size376597	Ug_unitig_899	+	376597	11039	369404	3453940	1312502	2464171
scaffold915_size35427	Ug_unitig_899	+	35427	9899	10466	3453940	1427251	1427818
scaffold471_size212349	Ug_unitig_899	+	212349	139026	141317	3453940	1500474	1502990
scaffold77_size793173	Ug_unitig_899	+	793173	85665	232484	3453940	1506450	1924617
scaffold482_size205035	Ug_unitig_899	+	205035	99489	179727	3453940	1477007	1714186
scaffold710_size92978	Ug_unitig_899	-	92978	74291	83736	3453940	1585743	1593279
scaffold873_size43579	Ug_unitig_899	+	43579	15702	16759	3453940	1599102	1600233
scaffold32_size1119335	Ug_unitig_899	+	1119335	566675	901186	3453940	911942	1832460
scaffold501_size196671	Ug_unitig_899	+	196671	155322	175386	3453940	1615386	2687573
scaffold407_size254605	Ug_unitig_899	+	254605	115386	231568	3453940	1671317	2982506
scaffold772_size70005	Ug_unitig_899	+	70005	35492	65255	3453940	1681645	1759744
scaffold49_size979919	Ug_unitig_899	+	979919	318456	791288	3453940	395108	3362455
scaffold1541_size5404	Ug_unitig_899	+	5404	2199	3187	3453940	1885111	1886237
scaffold263_size379573	Ug_unitig_899	+	379573	3795	7993	3453940	1911608	1954140
scaffold354_size300507	Ug_unitig_899	-	300507	173093	224370	3453940	1992700	2041224
scaffold1333_size8607	Ug_unitig_899	+	8607	270	1684	3453940	2025640	2027080
scaffold1334_size8604	Ug_unitig_899	+	8604	270	1684	3453940	2025640	2027080
scaffold1077_size19203	Ug_unitig_899	+	19203	13509	14097	3453940	2055735	2056331
scaffold384_size274972	Ug_unitig_899	+	274972	25722	103037	3453940	2064815	2071327
scaffold693_size97963	Ug_unitig_899	+	97963	28779	95766	3453940	2068748	2124705
scaffold411_size250506	Ug_unitig_899	+	250506	7731	232921	3453940	665272	2948701
scaffold1152_size15161	Ug_unitig_899	-	15161	3004	7790	3453940	2174708	2182115
scaffold1005_size24999	Ug_unitig_899	+	24999	12366	12451	3453940	2196693	2196778
scaffold804_size60364	Ug_unitig_899	-	60364	32802	45346	3453940	2190689	2204660
scaffold1695_size2204	Ug_unitig_899	+	2204	1057	2090	3453940	2234988	2235946
scaffold1195_size13126	Ug_unitig_899	-	13126	9373	12139	3453940	2234988	2237863
scaffold950_size30049	Ug_unitig_899	+	30049	1963	2807	3453940	2258416	2259293
scaffold720_size90262	Ug_unitig_899	+	90262	33409	86970	3453940	2297805	2346574
scaffold169_size519396	Ug_unitig_899	+	519396	13813	127209	3453940	2372560	2523169
scaffold355_size298094	Ug_unitig_899	+	298094	9636	28288	3453940	2437845	2466139
scaffold1042_size21777	Ug_unitig_899	-	21777	239	3135	3453940	2531890	2533669
scaffold524_size182843	Ug_unitig_899	-	182843	3906	182534	3453940	2035353	3146467
scaffold350_size304998	Ug_unitig_899	+	304998	15852	297518	3453940	2512390	2747349
scaffold648_size118734	Ug_unitig_899	-	118734	73038	118283	3453940	2621074	2682540
scaffold383_size275080	Ug_unitig_899	+	275080	242	31766	3453940	2615938	2663939
scaffold249_size395244	Ug_unitig_899	+	395244	755	202120	3453940	2303724	2796147
scaffold1268_size10093	Ug_unitig_899	-	10093	3678	4134	3453940	2773868	2774324
scaffold371_size285767	Ug_unitig_899	+	285767	17674	57412	3453940	2914408	2990023
scaffold1322_size8897	Ug_unitig_899	-	8897	1098	8011	3453940	3035473	3042265
scaffold876_size43045	Ug_unitig_899	-	43045	14555	17973	3453940	3045709	3049011
scaffold897_size38969	Ug_unitig_899	+	38969	18810	28467	3453940	3079960	3087419
scaffold1176_size14172	Ug_unitig_899	+	14172	6	12151	3453940	2154910	3166020
scaffold413_size249949	Ug_unitig_899	+	249949	86842	155763	3453940	1034679	3397011
scaffold731_size85304	Ug_unitig_899	-	85304	22630	41794	3453940	3355475	3374605
scaffold642_size121732	Ug_unitig_899	-	121732	27718	54202	3453940	3377083	3388324
scaffold868_size44554	Ug_unitig_899	-	44554	38635	43499	3453940	3385646	3388324
scaffold508_size190849	Ug_unitig_899	+	190849	144759	164173	3453940	3390174	3402032
scaffold1433_size6757	Ug_unitig_899	-	6757	5570	6689	3453940	3439253	3440152
scaffold1113_size16751	Ug_unitig_8	-	16751	1365	3859	6822880	17115	19774
scaffold577_size145990	Ug_unitig_8	+	145990	38910	67590	6822880	17115	544296
scaffold753_size76750	Ug_unitig_8	-	76750	46996	76517	6822880	34944	1487849
scaffold487_size202209	Ug_unitig_8	+	202209	33911	79101	6822880	163510	177952
scaffold952_size29999	Ug_unitig_8	+	29999	20174	23119	6822880	215787	218710
scaffold106_size656854	Ug_unitig_8	+	656854	428010	636815	6822880	197163	6509415
scaffold1019_size23903	Ug_unitig_8	-	23903	18860	21981	6822880	249823	253513
scaffold1188_size13387	Ug_unitig_8	-	13387	3900	7021	6822880	249823	253513
scaffold1318_size8943	Ug_unitig_8	-	8943	3900	7021	6822880	249823	253513
scaffold601_size134591	Ug_unitig_8	+	134591	3668	9173	6822880	258075	262054
scaffold628_size126813	Ug_unitig_8	+	126813	31709	43844	6822880	325861	336728
scaffold746_size79265	Ug_unitig_8	+	79265	38102	62506	6822880	391098	395156
scaffold58_size900371	Ug_unitig_8	+	900371	482424	858522	6822880	391236	4378082
scaffold1056_size21079	Ug_unitig_8	-	21079	54	7398	6822880	456246	475025
scaffold590_size139453	Ug_unitig_8	-	139453	77015	90439	6822880	455427	466467
scaffold1214_size11807	Ug_unitig_8	-	11807	9361	11739	6822880	501435	504390
scaffold946_size30262	Ug_unitig_8	+	30262	4106	5463	6822880	539647	541007
scaffold756_size75642	Ug_unitig_8	-	75642	1079	75305	6822880	551685	634039
scaffold275_size367480	Ug_unitig_8	-	367480	45526	312335	6822880	573108	1513663
scaffold970_size27896	Ug_unitig_8	+	27896	8720	13096	6822880	705792	708482
scaffold159_size538032	Ug_unitig_8	+	538032	63358	379541	6822880	681764	869158
scaffold108_size655003	Ug_unitig_8	+	655003	160287	452196	6822880	468660	2818411
scaffold492_size200913	Ug_unitig_8	+	200913	4618	90370	6822880	729998	790410
scaffold664_size111833	Ug_unitig_8	+	111833	29838	91971	6822880	758312	790410
scaffold620_size128314	Ug_unitig_8	+	128314	10883	70275	6822880	810030	1513663
scaffold505_size193468	Ug_unitig_8	+	193468	53529	165734	6822880	396754	1337800
scaffold574_size148320	Ug_unitig_8	+	148320	32420	96895	6822880	487161	2332829
scaffold997_size25677	Ug_unitig_8	-	25677	12045	15665	6822880	1002821	1006348
scaffold546_size167141	Ug_unitig_8	+	167141	879	37585	6822880	1039535	1068984
scaffold299_size348511	Ug_unitig_8	+	348511	314269	341334	6822880	1065847	1078796
scaffold1473_size6182	Ug_unitig_8	-	6182	3102	6148	6822880	1094421	1097494
scaffold25_size1264610	Ug_unitig_8	+	1264610	98586	1026379	6822880	165867	6206235
scaffold561_size156615	Ug_unitig_8	+	156615	118591	153820	6822880	510650	1204590
scaffold985_size26605	Ug_unitig_8	+	26605	81	449	6822880	1210798	1211163
scaffold1225_size11489	Ug_unitig_8	+	11489	81	449	6822880	1210798	1211163
scaffold1345_size8339	Ug_unitig_8	-	8339	4531	6481	6822880	1344919	1345910
scaffold966_size28107	Ug_unitig_8	-	28107	6700	23267	6822880	1472922	1479748
scaffold775_size68853	Ug_unitig_8	-	68853	2294	22239	6822880	1334991	6605734
scaffold199_size465929	Ug_unitig_8	+	465929	358737	360492	6822880	1685277	1686943
scaffold447_size226588	Ug_unitig_8	+	226588	19756	223088	6822880	179131	1740307
scaffold123_size610937	Ug_unitig_8	+	610937	6484	571899	6822880	34944	5960037
scaffold279_size365527	Ug_unitig_8	+	365527	15092	257208	6822880	972917	3290734
scaffold6_size1644274	Ug_unitig_8	+	1644274	21962	1216751	6822880	323633	5697359
scaffold230_size422617	Ug_unitig_8	+	422617	66945	421439	6822880	1748178	5938775
scaffold431_size238522	Ug_unitig_8	+	238522	111518	162047	6822880	1931490	1940430
scaffold847_size47669	Ug_unitig_8	-	47669	238	2744	6822880	1964771	1967413
scaffold565_size154525	Ug_unitig_8	+	154525	34380	38126	6822880	1977329	1980888
scaffold273_size369092	Ug_unitig_8	+	369092	22146	72297	6822880	1977329	2346541
scaffold583_size141823	Ug_unitig_8	+	141823	50768	112952	6822880	1848067	2140258
scaffold211_size447269	Ug_unitig_8	+	447269	328334	440151	6822880	1930524	2111660
scaffold444_size228446	Ug_unitig_8	+	228446	163496	187615	6822880	2098937	2111660
scaffold699_size96700	Ug_unitig_8	+	96700	14408	88528	6822880	1848067	3226355
scaffold955_size29548	Ug_unitig_8	-	29548	9878	13423	6822880	2191669	2195216
scaffold222_size435352	Ug_unitig_8	+	435352	87166	393255	6822880	2134	2950071
scaffold1063_size20688	Ug_unitig_8	-	20688	18530	20301	6822880	2266986	2268046
scaffold1072_size19431	Ug_unitig_8	+	19431	18365	19388	6822880	2343856	2344809
scaffold1576_size5042	Ug_unitig_8	+	5042	3976	4999	6822880	2343856	2344809
scaffold766_size71686	Ug_unitig_8	+	71686	43	33589	6822880	2343148	2346748
scaffold974_size27438	Ug_unitig_8	+	27438	15283	17131	6822880	2343148	2346748
scaffold1451_size6563	Ug_unitig_8	+	6563	3020	3621	6822880	2346112	2346748
scaffold855_size46386	Ug_unitig_8	+	46386	28820	43231	6822880	2397742	2407014
scaffold519_size185338	Ug_unitig_8	+	185338	61686	181267	6822880	2397742	2449726
scaffold571_size149637	Ug_unitig_8	+	149637	1165	3356	6822880	2558257	2560524
scaffold323_size325199	Ug_unitig_8	-	325199	125597	189946	6822880	2558257	2582762
scaffold562_size155008	Ug_unitig_8	+	155008	49838	146390	6822880	2493557	2620539
scaffold1172_size14410	Ug_unitig_8	+	14410	7389	14219	6822880	2613405	2620252
scaffold376_size278392	Ug_unitig_8	+	278392	104897	277321	6822880	1843435	3226355
scaffold1498_size5927	Ug_unitig_8	-	5927	127	4337	6822880	2709935	2712058
scaffold1526_size5634	Ug_unitig_8	+	5634	1585	3151	6822880	2840341	2841933
scaffold1537_size5455	Ug_unitig_8	+	5455	1585	3151	6822880	2840341	2841933
scaffold1210_size12088	Ug_unitig_8	-	12088	93	7448	6822880	2872125	2891569
scaffold964_size28131	Ug_unitig_8	-	28131	11043	19935	6822880	2928172	2937148
scaffold1445_size6657	Ug_unitig_8	-	6657	210	6060	6822880	189546	5187061
scaffold1447_size6641	Ug_unitig_8	-	6641	210	6044	6822880	189546	5187061
scaffold735_size82422	Ug_unitig_8	-	82422	7823	81635	6822880	3088903	3165348
scaffold937_size31582	Ug_unitig_8	+	31582	1071	10162	6822880	3158373	3167598
scaffold552_size162563	Ug_unitig_8	+	162563	130633	134772	6822880	3258695	3262815
scaffold130_size602244	Ug_unitig_8	+	602244	367860	602130	6822880	258075	6045809
scaffold1709_size1949	Ug_unitig_8	+	1949	331	1770	6822880	3490932	3492332
scaffold1487_size6036	Ug_unitig_8	+	6036	307	1580	6822880	3491060	3492332
scaffold432_size238105	Ug_unitig_8	+	238105	142628	237853	6822880	2752389	5941396
scaffold332_size321420	Ug_unitig_8	+	321420	11251	179876	6822880	2558257	6352268
scaffold1710_size1940	Ug_unitig_8	-	1940	1477	1872	6822880	4048485	4048888
scaffold533_size178161	Ug_unitig_8	+	178161	1464	6704	6822880	4225303	4227989
scaffold865_size45177	Ug_unitig_8	+	45177	23662	26186	6822880	4394482	4397241
scaffold1357_size8139	Ug_unitig_8	-	8139	2300	4826	6822880	4394482	4397241
scaffold1153_size15141	Ug_unitig_8	+	15141	12131	12694	6822880	4776111	4776294
scaffold84_size759781	Ug_unitig_8	+	759781	84688	713430	6822880	179205	5363026
scaffold1368_size7988	Ug_unitig_8	+	7988	107	254	6822880	5079137	5079310
scaffold361_size292200	Ug_unitig_8	+	292200	4284	174636	6822880	263645	6145056
scaffold607_size133233	Ug_unitig_8	+	133233	91665	128289	6822880	5424944	5519919
scaffold1300_size9405	Ug_unitig_8	-	9405	7560	8573	6822880	5472515	5473459
scaffold157_size542792	Ug_unitig_8	+	542792	126637	398771	6822880	1843435	5561874
scaffold276_size366521	Ug_unitig_8	+	366521	119408	298126	6822880	567772	6027452
scaffold1528_size5622	Ug_unitig_8	-	5622	70	1606	6822880	5975670	5977316
scaffold545_size168148	Ug_unitig_8	+	168148	19296	22142	6822880	6018783	6025930
scaffold1523_size5678	Ug_unitig_8	-	5678	1904	4085	6822880	6032660	6034838
scaffold240_size406237	Ug_unitig_8	+	406237	93173	305260	6822880	1104195	6045809
scaffold1348_size8263	Ug_unitig_8	+	8263	748	2287	6822880	6052085	6053647
scaffold1556_size5248	Ug_unitig_8	+	5248	2441	5241	6822880	6116597	6118848
scaffold557_size158656	Ug_unitig_8	+	158656	42740	61289	6822880	6216958	6225134
scaffold586_size141285	Ug_unitig_8	-	141285	70453	116983	6822880	6237379	6293917
scaffold1158_size14884	Ug_unitig_8	-	14884	6929	12102	6822880	6308239	6311299
scaffold1506_size5830	Ug_unitig_8	-	5830	4598	5804	6822880	6330245	6331511
scaffold298_size348755	Ug_unitig_8	+	348755	58826	321731	6822880	2780619	6775062
scaffold1208_size12265	Ug_unitig_8	+	12265	495	5354	6822880	6387052	6395908
scaffold563_size154924	Ug_unitig_8	-	154924	68326	74404	6822880	6403352	6409637
scaffold739_size81091	Ug_unitig_8	+	81091	830	7864	6822880	6419040	6425887
scaffold845_size48912	Ug_unitig_8	-	48912	830	7864	6822880	6419040	6425887
scaffold624_size127768	Ug_unitig_8	+	127768	61210	124705	6822880	6061215	6593162
scaffold862_size45560	Ug_unitig_8	+	45560	2453	22733	6822880	6211935	6750552
scaffold921_size34329	Ug_unitig_8	-	34329	25160	28151	6822880	6700068	6703288
scaffold1251_size10739	Ug_unitig_90	+	10739	7657	7992	643527	78038	78353
scaffold1054_size21101	Ug_unitig_90	+	21101	1112	7250	643527	172547	178406
scaffold1074_size19298	Ug_unitig_90	-	19298	2914	11476	643527	163818	207829
scaffold151_size559051	Ug_unitig_90	+	559051	289	174113	643527	57680	572520
scaffold591_size139029	Ug_unitig_90	+	139029	125567	137561	643527	368514	451626
scaffold708_size93858	Ug_unitig_90	-	93858	53880	92923	643527	181360	453156
scaffold603_size133874	Ug_unitig_90	+	133874	113955	132939	643527	181360	453156
scaffold1293_size9539	Ug_unitig_90	-	9539	615	9394	643527	443386	453156
scaffold1160_size14867	Ug_unitig_90	-	14867	202	5282	643527	421627	451626
scaffold615_size129786	Ug_unitig_92	+	129786	28252	124721	455599	49316	94576
scaffold1175_size14255	Ug_unitig_92	+	14255	3071	3285	455599	80527	80740
scaffold262_size380975	Ug_unitig_92	+	380975	361866	373237	455599	129108	140082
scaffold973_size27450	Ug_unitig_92	-	27450	9998	18391	455599	126401	143085
scaffold518_size185628	Ug_unitig_92	+	185628	88872	93637	455599	169754	174604
scaffold668_size110816	Ug_unitig_92	+	110816	6841	97136	455599	126401	221559
scaffold540_size172311	Ug_unitig_92	+	172311	164800	166518	455599	265685	267602
scaffold1170_size14543	Ug_unitig_92	-	14543	6833	14345	455599	303973	314680
scaffold765_size72457	Ug_unitig_92	+	72457	11332	52990	455599	390581	425983
scaffold1041_size21800	Ug_unitig_92	+	21800	19097	19887	455599	425194	425983
scaffold1169_size14550	Ug_unitig_8	-	14550	10819	13513	6822880	3285102	3285821
scaffold1196_size13094	Ug_unitig_8	-	13094	1795	6921	6822880	3298866	3301479
scaffold634_size124079	None	+	124079	na	na	na	na	na
scaffold644_size119944	None	+	119944	na	na	na	na	na
scaffold663_size112132	None	+	112132	na	na	na	na	na
scaffold689_size99217	None	+	99217	na	na	na	na	na
scaffold697_size97550	None	+	97550	na	na	na	na	na
scaffold702_size95231	None	+	95231	na	na	na	na	na
scaffold727_size87636	None	+	87636	na	na	na	na	na
scaffold732_size84355	None	+	84355	na	na	na	na	na
scaffold800_size61662	None	+	61662	na	na	na	na	na
scaffold803_size60720	None	+	60720	na	na	na	na	na
scaffold808_size58761	None	+	58761	na	na	na	na	na
scaffold813_size57398	None	+	57398	na	na	na	na	na
scaffold861_size45613	None	+	45613	na	na	na	na	na
scaffold867_size44793	None	+	44793	na	na	na	na	na
scaffold874_size43416	None	+	43416	na	na	na	na	na
scaffold881_size42520	None	+	42520	na	na	na	na	na
scaffold882_size42275	None	+	42275	na	na	na	na	na
scaffold912_size36338	None	+	36338	na	na	na	na	na
scaffold922_size34272	None	+	34272	na	na	na	na	na
scaffold923_size34232	None	+	34232	na	na	na	na	na
scaffold926_size33732	None	+	33732	na	na	na	na	na
scaffold927_size33562	None	+	33562	na	na	na	na	na
scaffold932_size32227	None	+	32227	na	na	na	na	na
scaffold933_size32127	None	+	32127	na	na	na	na	na
scaffold936_size31872	None	+	31872	na	na	na	na	na
scaffold945_size30406	None	+	30406	na	na	na	na	na
scaffold963_size28341	None	+	28341	na	na	na	na	na
scaffold968_size27992	None	+	27992	na	na	na	na	na
scaffold969_size27970	None	+	27970	na	na	na	na	na
scaffold977_size27050	None	+	27050	na	na	na	na	na
scaffold980_size26778	None	+	26778	na	na	na	na	na
scaffold981_size26757	None	+	26757	na	na	na	na	na
scaffold988_size26493	None	+	26493	na	na	na	na	na
scaffold989_size26411	None	+	26411	na	na	na	na	na
scaffold994_size25964	None	+	25964	na	na	na	na	na
scaffold995_size25810	None	+	25810	na	na	na	na	na
scaffold996_size25677	None	+	25677	na	na	na	na	na
scaffold1000_size25310	None	+	25310	na	na	na	na	na
scaffold1003_size25156	None	+	25156	na	na	na	na	na
scaffold1014_size24417	None	+	24417	na	na	na	na	na
scaffold1015_size24410	None	+	24410	na	na	na	na	na
scaffold1021_size23839	None	+	23839	na	na	na	na	na
scaffold1023_size23732	None	+	23732	na	na	na	na	na
scaffold1026_size23606	None	+	23606	na	na	na	na	na
scaffold1030_size23415	None	+	23415	na	na	na	na	na
scaffold1031_size23289	None	+	23289	na	na	na	na	na
scaffold1039_size21856	None	+	21856	na	na	na	na	na
scaffold1043_size21697	None	+	21697	na	na	na	na	na
scaffold1045_size21638	None	+	21638	na	na	na	na	na
scaffold1049_size21338	None	+	21338	na	na	na	na	na
scaffold1058_size21009	None	+	21009	na	na	na	na	na
scaffold1059_size20906	None	+	20906	na	na	na	na	na
scaffold1060_size20828	None	+	20828	na	na	na	na	na
scaffold1066_size20206	None	+	20206	na	na	na	na	na
scaffold1068_size19638	None	+	19638	na	na	na	na	na
scaffold1069_size19513	None	+	19513	na	na	na	na	na
scaffold1070_size19467	None	+	19467	na	na	na	na	na
scaffold1079_size19013	None	+	19013	na	na	na	na	na
scaffold1081_size18940	None	+	18940	na	na	na	na	na
scaffold1094_size17834	None	+	17834	na	na	na	na	na
scaffold1095_size17812	None	+	17812	na	na	na	na	na
scaffold1097_size17658	None	+	17658	na	na	na	na	na
scaffold1099_size17546	None	+	17546	na	na	na	na	na
scaffold1103_size17218	None	+	17218	na	na	na	na	na
scaffold1104_size17142	None	+	17142	na	na	na	na	na
scaffold1105_size17072	None	+	17072	na	na	na	na	na
scaffold1107_size16955	None	+	16955	na	na	na	na	na
scaffold1108_size16952	None	+	16952	na	na	na	na	na
scaffold1109_size16905	None	+	16905	na	na	na	na	na
scaffold1111_size16767	None	+	16767	na	na	na	na	na
scaffold1115_size16693	None	+	16693	na	na	na	na	na
scaffold1129_size16224	None	+	16224	na	na	na	na	na
scaffold1130_size16129	None	+	16129	na	na	na	na	na
scaffold1137_size15769	None	+	15769	na	na	na	na	na
scaffold1151_size15230	None	+	15230	na	na	na	na	na
scaffold1154_size15058	None	+	15058	na	na	na	na	na
scaffold1166_size14656	None	+	14656	na	na	na	na	na
scaffold1167_size14652	None	+	14652	na	na	na	na	na
scaffold1186_size13503	None	+	13503	na	na	na	na	na
scaffold1189_size13384	None	+	13384	na	na	na	na	na
scaffold1190_size13382	None	+	13382	na	na	na	na	na
scaffold1191_size13242	None	+	13242	na	na	na	na	na
scaffold1192_size13234	None	+	13234	na	na	na	na	na
scaffold1193_size13189	None	+	13189	na	na	na	na	na
scaffold1198_size12897	None	+	12897	na	na	na	na	na
scaffold1199_size12896	None	+	12896	na	na	na	na	na
scaffold1200_size12864	None	+	12864	na	na	na	na	na
scaffold1201_size12832	None	+	12832	na	na	na	na	na
scaffold1202_size12764	None	+	12764	na	na	na	na	na
scaffold1204_size12544	None	+	12544	na	na	na	na	na
scaffold1207_size12337	None	+	12337	na	na	na	na	na
scaffold1211_size12083	None	+	12083	na	na	na	na	na
scaffold1218_size11661	None	+	11661	na	na	na	na	na
scaffold1219_size11640	None	+	11640	na	na	na	na	na
scaffold1220_size11610	None	+	11610	na	na	na	na	na
scaffold1223_size11515	None	+	11515	na	na	na	na	na
scaffold1224_size11503	None	+	11503	na	na	na	na	na
scaffold1227_size11362	None	+	11362	na	na	na	na	na
scaffold1231_size11281	None	+	11281	na	na	na	na	na
scaffold1232_size11202	None	+	11202	na	na	na	na	na
scaffold1244_size10876	None	+	10876	na	na	na	na	na
scaffold1245_size10869	None	+	10869	na	na	na	na	na
scaffold1247_size10794	None	+	10794	na	na	na	na	na
scaffold1249_size10763	None	+	10763	na	na	na	na	na
scaffold1254_size10608	None	+	10608	na	na	na	na	na
scaffold1255_size10584	None	+	10584	na	na	na	na	na
scaffold1257_size10491	None	+	10491	na	na	na	na	na
scaffold1258_size10482	None	+	10482	na	na	na	na	na
scaffold1260_size10448	None	+	10448	na	na	na	na	na
scaffold1266_size10238	None	+	10238	na	na	na	na	na
scaffold1267_size10222	None	+	10222	na	na	na	na	na
scaffold1271_size9971	None	+	9971	na	na	na	na	na
scaffold1275_size9854	None	+	9854	na	na	na	na	na
scaffold1276_size9848	None	+	9848	na	na	na	na	na
scaffold1277_size9836	None	+	9836	na	na	na	na	na
scaffold1286_size9651	None	+	9651	na	na	na	na	na
scaffold1289_size9593	None	+	9593	na	na	na	na	na
scaffold1291_size9561	None	+	9561	na	na	na	na	na
scaffold1295_size9508	None	+	9508	na	na	na	na	na
scaffold1296_size9482	None	+	9482	na	na	na	na	na
scaffold1302_size9365	None	+	9365	na	na	na	na	na
scaffold1303_size9337	None	+	9337	na	na	na	na	na
scaffold1304_size9285	None	+	9285	na	na	na	na	na
scaffold1308_size9198	None	+	9198	na	na	na	na	na
scaffold1312_size9101	None	+	9101	na	na	na	na	na
scaffold1315_size9015	None	+	9015	na	na	na	na	na
scaffold1319_size8926	None	+	8926	na	na	na	na	na
scaffold1326_size8736	None	+	8736	na	na	na	na	na
scaffold1327_size8709	None	+	8709	na	na	na	na	na
scaffold1329_size8672	None	+	8672	na	na	na	na	na
scaffold1330_size8669	None	+	8669	na	na	na	na	na
scaffold1335_size8550	None	+	8550	na	na	na	na	na
scaffold1338_size8444	None	+	8444	na	na	na	na	na
scaffold1341_size8419	None	+	8419	na	na	na	na	na
scaffold1344_size8343	None	+	8343	na	na	na	na	na
scaffold1346_size8295	None	+	8295	na	na	na	na	na
scaffold1351_size8190	None	+	8190	na	na	na	na	na
scaffold1359_size8137	None	+	8137	na	na	na	na	na
scaffold1362_size8094	None	+	8094	na	na	na	na	na
scaffold1364_size8066	None	+	8066	na	na	na	na	na
scaffold1366_size8034	None	+	8034	na	na	na	na	na
scaffold1369_size7988	None	+	7988	na	na	na	na	na
scaffold1371_size7914	None	+	7914	na	na	na	na	na
scaffold1372_size7912	None	+	7912	na	na	na	na	na
scaffold1373_size7910	None	+	7910	na	na	na	na	na
scaffold1376_size7863	None	+	7863	na	na	na	na	na
scaffold1379_size7743	None	+	7743	na	na	na	na	na
scaffold1381_size7627	None	+	7627	na	na	na	na	na
scaffold1383_size7612	None	+	7612	na	na	na	na	na
scaffold1387_size7493	None	+	7493	na	na	na	na	na
scaffold1389_size7485	None	+	7485	na	na	na	na	na
scaffold1391_size7447	None	+	7447	na	na	na	na	na
scaffold1393_size7326	None	+	7326	na	na	na	na	na
scaffold1394_size7323	None	+	7323	na	na	na	na	na
scaffold1395_size7295	None	+	7295	na	na	na	na	na
scaffold1396_size7292	None	+	7292	na	na	na	na	na
scaffold1398_size7278	None	+	7278	na	na	na	na	na
scaffold1399_size7274	None	+	7274	na	na	na	na	na
scaffold1400_size7255	None	+	7255	na	na	na	na	na
scaffold1403_size7198	None	+	7198	na	na	na	na	na
scaffold1404_size7197	None	+	7197	na	na	na	na	na
scaffold1407_size7167	None	+	7167	na	na	na	na	na
scaffold1409_size7141	None	+	7141	na	na	na	na	na
scaffold1411_size7102	None	+	7102	na	na	na	na	na
scaffold1415_size7076	None	+	7076	na	na	na	na	na
scaffold1418_size7026	None	+	7026	na	na	na	na	na
scaffold1420_size6990	None	+	6990	na	na	na	na	na
scaffold1421_size6951	None	+	6951	na	na	na	na	na
scaffold1422_size6930	None	+	6930	na	na	na	na	na
scaffold1424_size6888	None	+	6888	na	na	na	na	na
scaffold1425_size6882	None	+	6882	na	na	na	na	na
scaffold1426_size6862	None	+	6862	na	na	na	na	na
scaffold1427_size6844	None	+	6844	na	na	na	na	na
scaffold1429_size6812	None	+	6812	na	na	na	na	na
scaffold1434_size6737	None	+	6737	na	na	na	na	na
scaffold1435_size6727	None	+	6727	na	na	na	na	na
scaffold1436_size6721	None	+	6721	na	na	na	na	na
scaffold1437_size6717	None	+	6717	na	na	na	na	na
scaffold1438_size6706	None	+	6706	na	na	na	na	na
scaffold1439_size6703	None	+	6703	na	na	na	na	na
scaffold1442_size6698	None	+	6698	na	na	na	na	na
scaffold1452_size6558	None	+	6558	na	na	na	na	na
scaffold1455_size6540	None	+	6540	na	na	na	na	na
scaffold1456_size6514	None	+	6514	na	na	na	na	na
scaffold1457_size6488	None	+	6488	na	na	na	na	na
scaffold1464_size6280	None	+	6280	na	na	na	na	na
scaffold1468_size6224	None	+	6224	na	na	na	na	na
scaffold1469_size6212	None	+	6212	na	na	na	na	na
scaffold1470_size6202	None	+	6202	na	na	na	na	na
scaffold1477_size6141	None	+	6141	na	na	na	na	na
scaffold1478_size6136	None	+	6136	na	na	na	na	na
scaffold1479_size6130	None	+	6130	na	na	na	na	na
scaffold1482_size6094	None	+	6094	na	na	na	na	na
scaffold1483_size6085	None	+	6085	na	na	na	na	na
scaffold1484_size6073	None	+	6073	na	na	na	na	na
scaffold1485_size6042	None	+	6042	na	na	na	na	na
scaffold1486_size6039	None	+	6039	na	na	na	na	na
scaffold1488_size6031	None	+	6031	na	na	na	na	na
scaffold1489_size6012	None	+	6012	na	na	na	na	na
scaffold1490_size6003	None	+	6003	na	na	na	na	na
scaffold1494_size5945	None	+	5945	na	na	na	na	na
scaffold1497_size5931	None	+	5931	na	na	na	na	na
scaffold1500_size5911	None	+	5911	na	na	na	na	na
scaffold1501_size5911	None	+	5911	na	na	na	na	na
scaffold1504_size5865	None	+	5865	na	na	na	na	na
scaffold1505_size5836	None	+	5836	na	na	na	na	na
scaffold1507_size5813	None	+	5813	na	na	na	na	na
scaffold1509_size5806	None	+	5806	na	na	na	na	na
scaffold1511_size5773	None	+	5773	na	na	na	na	na
scaffold1514_size5747	None	+	5747	na	na	na	na	na
scaffold1515_size5737	None	+	5737	na	na	na	na	na
scaffold1516_size5732	None	+	5732	na	na	na	na	na
scaffold1521_size5687	None	+	5687	na	na	na	na	na
scaffold1522_size5680	None	+	5680	na	na	na	na	na
scaffold1524_size5672	None	+	5672	na	na	na	na	na
scaffold1525_size5668	None	+	5668	na	na	na	na	na
scaffold1529_size5620	None	+	5620	na	na	na	na	na
scaffold1530_size5592	None	+	5592	na	na	na	na	na
scaffold1531_size5547	None	+	5547	na	na	na	na	na
scaffold1532_size5522	None	+	5522	na	na	na	na	na
scaffold1533_size5517	None	+	5517	na	na	na	na	na
scaffold1535_size5500	None	+	5500	na	na	na	na	na
scaffold1536_size5475	None	+	5475	na	na	na	na	na
scaffold1539_size5439	None	+	5439	na	na	na	na	na
scaffold1540_size5431	None	+	5431	na	na	na	na	na
scaffold1543_size5394	None	+	5394	na	na	na	na	na
scaffold1544_size5385	None	+	5385	na	na	na	na	na
scaffold1545_size5374	None	+	5374	na	na	na	na	na
scaffold1548_size5354	None	+	5354	na	na	na	na	na
scaffold1549_size5353	None	+	5353	na	na	na	na	na
scaffold1551_size5329	None	+	5329	na	na	na	na	na
scaffold1552_size5329	None	+	5329	na	na	na	na	na
scaffold1553_size5297	None	+	5297	na	na	na	na	na
scaffold1554_size5290	None	+	5290	na	na	na	na	na
scaffold1557_size5243	None	+	5243	na	na	na	na	na
scaffold1558_size5242	None	+	5242	na	na	na	na	na
scaffold1560_size5225	None	+	5225	na	na	na	na	na
scaffold1561_size5207	None	+	5207	na	na	na	na	na
scaffold1562_size5203	None	+	5203	na	na	na	na	na
scaffold1564_size5150	None	+	5150	na	na	na	na	na
scaffold1565_size5141	None	+	5141	na	na	na	na	na
scaffold1566_size5131	None	+	5131	na	na	na	na	na
scaffold1568_size5088	None	+	5088	na	na	na	na	na
scaffold1570_size5079	None	+	5079	na	na	na	na	na
scaffold1571_size5077	None	+	5077	na	na	na	na	na
scaffold1574_size5055	None	+	5055	na	na	na	na	na
scaffold1575_size5047	None	+	5047	na	na	na	na	na
scaffold1577_size5040	None	+	5040	na	na	na	na	na
scaffold1579_size4969	None	+	4969	na	na	na	na	na
scaffold1580_size4850	None	+	4850	na	na	na	na	na
scaffold1581_size4755	None	+	4755	na	na	na	na	na
scaffold1582_size4715	None	+	4715	na	na	na	na	na
scaffold1583_size4683	None	+	4683	na	na	na	na	na
scaffold1585_size4648	None	+	4648	na	na	na	na	na
scaffold1587_size4534	None	+	4534	na	na	na	na	na
scaffold1588_size4520	None	+	4520	na	na	na	na	na
scaffold1589_size4519	None	+	4519	na	na	na	na	na
scaffold1590_size4518	None	+	4518	na	na	na	na	na
scaffold1591_size4511	None	+	4511	na	na	na	na	na
scaffold1592_size4508	None	+	4508	na	na	na	na	na
scaffold1594_size4446	None	+	4446	na	na	na	na	na
scaffold1595_size4434	None	+	4434	na	na	na	na	na
scaffold1596_size4415	None	+	4415	na	na	na	na	na
scaffold1597_size4411	None	+	4411	na	na	na	na	na
scaffold1599_size4364	None	+	4364	na	na	na	na	na
scaffold1600_size4318	None	+	4318	na	na	na	na	na
scaffold1601_size4304	None	+	4304	na	na	na	na	na
scaffold1604_size4224	None	+	4224	na	na	na	na	na
scaffold1605_size4201	None	+	4201	na	na	na	na	na
scaffold1606_size4188	None	+	4188	na	na	na	na	na
scaffold1607_size4169	None	+	4169	na	na	na	na	na
scaffold1608_size4127	None	+	4127	na	na	na	na	na
scaffold1609_size4077	None	+	4077	na	na	na	na	na
scaffold1610_size4036	None	+	4036	na	na	na	na	na
scaffold1611_size4035	None	+	4035	na	na	na	na	na
scaffold1613_size3940	None	+	3940	na	na	na	na	na
scaffold1614_size3928	None	+	3928	na	na	na	na	na
scaffold1615_size3843	None	+	3843	na	na	na	na	na
scaffold1616_size3794	None	+	3794	na	na	na	na	na
scaffold1617_size3773	None	+	3773	na	na	na	na	na
scaffold1618_size3756	None	+	3756	na	na	na	na	na
scaffold1619_size3740	None	+	3740	na	na	na	na	na
scaffold1621_size3728	None	+	3728	na	na	na	na	na
scaffold1622_size3720	None	+	3720	na	na	na	na	na
scaffold1623_size3704	None	+	3704	na	na	na	na	na
scaffold1624_size3670	None	+	3670	na	na	na	na	na
scaffold1625_size3582	None	+	3582	na	na	na	na	na
scaffold1627_size3560	None	+	3560	na	na	na	na	na
scaffold1628_size3523	None	+	3523	na	na	na	na	na
scaffold1629_size3507	None	+	3507	na	na	na	na	na
scaffold1630_size3424	None	+	3424	na	na	na	na	na
scaffold1631_size3407	None	+	3407	na	na	na	na	na
scaffold1632_size3402	None	+	3402	na	na	na	na	na
scaffold1633_size3375	None	+	3375	na	na	na	na	na
scaffold1634_size3362	None	+	3362	na	na	na	na	na
scaffold1636_size3334	None	+	3334	na	na	na	na	na
scaffold1637_size3307	None	+	3307	na	na	na	na	na
scaffold1638_size3266	None	+	3266	na	na	na	na	na
scaffold1641_size3185	None	+	3185	na	na	na	na	na
scaffold1643_size3170	None	+	3170	na	na	na	na	na
scaffold1644_size3146	None	+	3146	na	na	na	na	na
scaffold1645_size3144	None	+	3144	na	na	na	na	na
scaffold1646_size3136	None	+	3136	na	na	na	na	na
scaffold1647_size3071	None	+	3071	na	na	na	na	na
scaffold1648_size3037	None	+	3037	na	na	na	na	na
scaffold1649_size3028	None	+	3028	na	na	na	na	na
scaffold1650_size3011	None	+	3011	na	na	na	na	na
scaffold1651_size2985	None	+	2985	na	na	na	na	na
scaffold1652_size2967	None	+	2967	na	na	na	na	na
scaffold1653_size2900	None	+	2900	na	na	na	na	na
scaffold1654_size2886	None	+	2886	na	na	na	na	na
scaffold1655_size2879	None	+	2879	na	na	na	na	na
scaffold1656_size2757	None	+	2757	na	na	na	na	na
scaffold1658_size2742	None	+	2742	na	na	na	na	na
scaffold1659_size2686	None	+	2686	na	na	na	na	na
scaffold1661_size2638	None	+	2638	na	na	na	na	na
scaffold1662_size2633	None	+	2633	na	na	na	na	na
scaffold1663_size2629	None	+	2629	na	na	na	na	na
scaffold1664_size2625	None	+	2625	na	na	na	na	na
scaffold1666_size2599	None	+	2599	na	na	na	na	na
scaffold1667_size2597	None	+	2597	na	na	na	na	na
scaffold1668_size2544	None	+	2544	na	na	na	na	na
scaffold1669_size2537	None	+	2537	na	na	na	na	na
scaffold1670_size2495	None	+	2495	na	na	na	na	na
scaffold1671_size2464	None	+	2464	na	na	na	na	na
scaffold1672_size2463	None	+	2463	na	na	na	na	na
scaffold1673_size2462	None	+	2462	na	na	na	na	na
scaffold1674_size2456	None	+	2456	na	na	na	na	na
scaffold1675_size2428	None	+	2428	na	na	na	na	na
scaffold1676_size2410	None	+	2410	na	na	na	na	na
scaffold1677_size2388	None	+	2388	na	na	na	na	na
scaffold1678_size2385	None	+	2385	na	na	na	na	na
scaffold1679_size2382	None	+	2382	na	na	na	na	na
scaffold1680_size2380	None	+	2380	na	na	na	na	na
scaffold1681_size2373	None	+	2373	na	na	na	na	na
scaffold1682_size2372	None	+	2372	na	na	na	na	na
scaffold1683_size2316	None	+	2316	na	na	na	na	na
scaffold1685_size2304	None	+	2304	na	na	na	na	na
scaffold1687_size2280	None	+	2280	na	na	na	na	na
scaffold1688_size2270	None	+	2270	na	na	na	na	na
scaffold1689_size2265	None	+	2265	na	na	na	na	na
scaffold1690_size2223	None	+	2223	na	na	na	na	na
scaffold1691_size2220	None	+	2220	na	na	na	na	na
scaffold1692_size2219	None	+	2219	na	na	na	na	na
scaffold1693_size2215	None	+	2215	na	na	na	na	na
scaffold1694_size2212	None	+	2212	na	na	na	na	na
scaffold1696_size2165	None	+	2165	na	na	na	na	na
scaffold1697_size2160	None	+	2160	na	na	na	na	na
scaffold1698_size2157	None	+	2157	na	na	na	na	na
scaffold1699_size2145	None	+	2145	na	na	na	na	na
scaffold1700_size2129	None	+	2129	na	na	na	na	na
scaffold1701_size2079	None	+	2079	na	na	na	na	na
scaffold1702_size2072	None	+	2072	na	na	na	na	na
scaffold1703_size2046	None	+	2046	na	na	na	na	na
scaffold1704_size2016	None	+	2016	na	na	na	na	na
scaffold1706_size1991	None	+	1991	na	na	na	na	na
scaffold1707_size1989	None	+	1989	na	na	na	na	na
scaffold1708_size1959	None	+	1959	na	na	na	na	na
scaffold1711_size1939	None	+	1939	na	na	na	na	na
scaffold1713_size1926	None	+	1926	na	na	na	na	na
scaffold1714_size1909	None	+	1909	na	na	na	na	na
scaffold1715_size1898	None	+	1898	na	na	na	na	na
scaffold1716_size1887	None	+	1887	na	na	na	na	na
scaffold1717_size1851	None	+	1851	na	na	na	na	na
scaffold1718_size1850	None	+	1850	na	na	na	na	na
scaffold1719_size1824	None	+	1824	na	na	na	na	na
scaffold1720_size1787	None	+	1787	na	na	na	na	na
scaffold1721_size1784	None	+	1784	na	na	na	na	na
scaffold1722_size1781	None	+	1781	na	na	na	na	na
scaffold1723_size1771	None	+	1771	na	na	na	na	na
scaffold1724_size1762	None	+	1762	na	na	na	na	na
scaffold1726_size1713	None	+	1713	na	na	na	na	na
scaffold1727_size1710	None	+	1710	na	na	na	na	na
scaffold1728_size1708	None	+	1708	na	na	na	na	na
scaffold1729_size1695	None	+	1695	na	na	na	na	na
scaffold1730_size1692	None	+	1692	na	na	na	na	na
scaffold1731_size1690	None	+	1690	na	na	na	na	na
scaffold1732_size1683	None	+	1683	na	na	na	na	na
scaffold1733_size1677	None	+	1677	na	na	na	na	na
scaffold1734_size1674	None	+	1674	na	na	na	na	na
scaffold1735_size1666	None	+	1666	na	na	na	na	na
scaffold1736_size1666	None	+	1666	na	na	na	na	na
scaffold1738_size1657	None	+	1657	na	na	na	na	na
scaffold1739_size1627	None	+	1627	na	na	na	na	na
scaffold1740_size1619	None	+	1619	na	na	na	na	na
scaffold1741_size1611	None	+	1611	na	na	na	na	na
scaffold1742_size1609	None	+	1609	na	na	na	na	na
scaffold1743_size1607	None	+	1607	na	na	na	na	na
scaffold1744_size1602	None	+	1602	na	na	na	na	na
scaffold1745_size1575	None	+	1575	na	na	na	na	na
scaffold1746_size1573	None	+	1573	na	na	na	na	na
scaffold1747_size1572	None	+	1572	na	na	na	na	na
scaffold1748_size1558	None	+	1558	na	na	na	na	na
scaffold1749_size1534	None	+	1534	na	na	na	na	na
scaffold1750_size1525	None	+	1525	na	na	na	na	na
scaffold1751_size1516	None	+	1516	na	na	na	na	na
scaffold1752_size1510	None	+	1510	na	na	na	na	na
scaffold1753_size1504	None	+	1504	na	na	na	na	na
scaffold1754_size1491	None	+	1491	na	na	na	na	na
scaffold1755_size1489	None	+	1489	na	na	na	na	na
scaffold1756_size1484	None	+	1484	na	na	na	na	na
scaffold1757_size1479	None	+	1479	na	na	na	na	na
scaffold1758_size1473	None	+	1473	na	na	na	na	na
scaffold1759_size1472	None	+	1472	na	na	na	na	na
scaffold1760_size1470	None	+	1470	na	na	na	na	na
scaffold1761_size1452	None	+	1452	na	na	na	na	na
scaffold1762_size1449	None	+	1449	na	na	na	na	na
scaffold1763_size1435	None	+	1435	na	na	na	na	na
scaffold1764_size1434	None	+	1434	na	na	na	na	na
scaffold1765_size1433	None	+	1433	na	na	na	na	na
scaffold1766_size1429	None	+	1429	na	na	na	na	na
scaffold1767_size1423	None	+	1423	na	na	na	na	na
scaffold1768_size1416	None	+	1416	na	na	na	na	na
scaffold1769_size1412	None	+	1412	na	na	na	na	na
scaffold1770_size1405	None	+	1405	na	na	na	na	na
scaffold1771_size1392	None	+	1392	na	na	na	na	na
scaffold1772_size1391	None	+	1391	na	na	na	na	na
scaffold1773_size1388	None	+	1388	na	na	na	na	na
scaffold1774_size1378	None	+	1378	na	na	na	na	na
scaffold1775_size1363	None	+	1363	na	na	na	na	na
scaffold1776_size1358	None	+	1358	na	na	na	na	na
scaffold1777_size1344	None	+	1344	na	na	na	na	na
scaffold1778_size1343	None	+	1343	na	na	na	na	na
scaffold1779_size1338	None	+	1338	na	na	na	na	na
scaffold1780_size1338	None	+	1338	na	na	na	na	na
scaffold1781_size1332	None	+	1332	na	na	na	na	na
scaffold1782_size1329	None	+	1329	na	na	na	na	na
scaffold1783_size1328	None	+	1328	na	na	na	na	na
scaffold1784_size1315	None	+	1315	na	na	na	na	na
scaffold1785_size1305	None	+	1305	na	na	na	na	na
scaffold1786_size1299	None	+	1299	na	na	na	na	na
scaffold1787_size1278	None	+	1278	na	na	na	na	na
scaffold1788_size1276	None	+	1276	na	na	na	na	na
scaffold1789_size1264	None	+	1264	na	na	na	na	na
scaffold1790_size1262	None	+	1262	na	na	na	na	na
scaffold1791_size1251	None	+	1251	na	na	na	na	na
scaffold1792_size1245	None	+	1245	na	na	na	na	na
scaffold1793_size1233	None	+	1233	na	na	na	na	na
scaffold1794_size1220	None	+	1220	na	na	na	na	na
scaffold1796_size1218	None	+	1218	na	na	na	na	na
scaffold1797_size1214	None	+	1214	na	na	na	na	na
scaffold1799_size1209	None	+	1209	na	na	na	na	na
scaffold1800_size1205	None	+	1205	na	na	na	na	na
scaffold1801_size1203	None	+	1203	na	na	na	na	na
scaffold1802_size1196	None	+	1196	na	na	na	na	na
scaffold1803_size1184	None	+	1184	na	na	na	na	na
scaffold1804_size1173	None	+	1173	na	na	na	na	na
scaffold1805_size1172	None	+	1172	na	na	na	na	na
scaffold1806_size1172	None	+	1172	na	na	na	na	na
scaffold1807_size1165	None	+	1165	na	na	na	na	na
scaffold1808_size1157	None	+	1157	na	na	na	na	na
scaffold1809_size1144	None	+	1144	na	na	na	na	na
scaffold1810_size1130	None	+	1130	na	na	na	na	na
scaffold1811_size1130	None	+	1130	na	na	na	na	na
scaffold1812_size1112	None	+	1112	na	na	na	na	na
scaffold1813_size1106	None	+	1106	na	na	na	na	na
scaffold1814_size1100	None	+	1100	na	na	na	na	na
scaffold1815_size1100	None	+	1100	na	na	na	na	na
scaffold1816_size1095	None	+	1095	na	na	na	na	na
scaffold1817_size1094	None	+	1094	na	na	na	na	na
scaffold1818_size1094	None	+	1094	na	na	na	na	na
scaffold1819_size1088	None	+	1088	na	na	na	na	na
scaffold1820_size1088	None	+	1088	na	na	na	na	na
scaffold1821_size1084	None	+	1084	na	na	na	na	na
scaffold1822_size1076	None	+	1076	na	na	na	na	na
scaffold1823_size1070	None	+	1070	na	na	na	na	na
scaffold1824_size1052	None	+	1052	na	na	na	na	na
scaffold1825_size1045	None	+	1045	na	na	na	na	na
scaffold1826_size1043	None	+	1043	na	na	na	na	na
scaffold1827_size1032	None	+	1032	na	na	na	na	na
scaffold1828_size1030	None	+	1030	na	na	na	na	na
scaffold1829_size1016	None	+	1016	na	na	na	na	na
scaffold1830_size1016	None	+	1016	na	na	na	na	na

## Sheet: Ugibba Vs URenif
Query	Target	Strand	Q-len	Q-start	Q-stop	T-len	T-start	T-stop
Ug_unitig_0	scaffold317_size334483	+	8502017	3776205	7626712	334483	35406	286366
Ug_unitig_100	None	+	34014	na	na	na	na	na
Ug_unitig_101	None	+	63870	na	na	na	na	na
Ug_unitig_102	scaffold148_size560834	+	24963	33	20122	560834	348363	354199
Ug_unitig_103	None	+	58943	na	na	na	na	na
Ug_unitig_104	None	+	65675	na	na	na	na	na
Ug_unitig_105	scaffold148_size560834	+	19495	144	3251	560834	351094	354199
Ug_unitig_107	scaffold148_size560834	+	29138	10326	29122	560834	334504	354199
Ug_unitig_108	scaffold148_size560834	+	16266	65	16236	560834	348363	354199
Ug_unitig_109	None	+	31001	na	na	na	na	na
Ug_unitig_10	scaffold7_size1580086	+	31224	14581	14725	1580086	1260364	1260508
Ug_unitig_110	None	+	40366	na	na	na	na	na
Ug_unitig_111	None	+	17976	na	na	na	na	na
Ug_unitig_112	scaffold148_size560834	+	44007	4	35734	560834	334863	354199
Ug_unitig_116	None	+	38747	na	na	na	na	na
Ug_unitig_117	None	+	36064	na	na	na	na	na
Ug_unitig_118	None	+	42104	na	na	na	na	na
Ug_unitig_119	scaffold148_size560834	+	38473	0	36917	560834	348363	354199
Ug_unitig_11	scaffold424_size243908	+	23538	2239	3187	243908	114768	115652
Ug_unitig_120	None	+	60267	na	na	na	na	na
Ug_unitig_123	None	+	53700	na	na	na	na	na
Ug_unitig_124	scaffold148_size560834	+	28292	182	28291	560834	348363	354199
Ug_unitig_125	None	+	25577	na	na	na	na	na
Ug_unitig_127	scaffold148_size560834	+	29888	20843	26548	560834	348363	354199
Ug_unitig_129	scaffold148_size560834	+	17249	3782	17231	560834	348363	361368
Ug_unitig_130	scaffold148_size560834	+	86526	929	86518	560834	348363	354199
Ug_unitig_131	None	+	65396	na	na	na	na	na
Ug_unitig_132	None	+	29483	na	na	na	na	na
Ug_unitig_133	None	+	28168	na	na	na	na	na
Ug_unitig_134	scaffold148_size560834	+	19163	2631	19125	560834	348363	354199
Ug_unitig_135	scaffold148_size560834	+	22754	3	18178	560834	348363	354199
Ug_unitig_136	None	+	32935	na	na	na	na	na
Ug_unitig_137	None	+	39936	na	na	na	na	na
Ug_unitig_138	None	+	17181	na	na	na	na	na
Ug_unitig_139	scaffold148_size560834	+	36220	24	35825	560834	348363	354199
Ug_unitig_13	scaffold7_size1580086	+	30476	26157	29677	1580086	1102809	1106114
Ug_unitig_143	scaffold148_size560834	+	33571	7	33559	560834	348363	354199
Ug_unitig_144	scaffold148_size560834	+	30229	33	30227	560834	348363	354199
Ug_unitig_145	scaffold148_size560834	+	27884	9	27882	560834	348363	354199
Ug_unitig_146	scaffold148_size560834	+	38457	124	38448	560834	348363	354199
Ug_unitig_147	None	+	27865	na	na	na	na	na
Ug_unitig_148	None	+	79478	na	na	na	na	na
Ug_unitig_14	scaffold105_size659173	+	35606	3898	4630	659173	478703	479394
Ug_unitig_150	None	+	53024	na	na	na	na	na
Ug_unitig_151	None	+	17991	na	na	na	na	na
Ug_unitig_152	scaffold148_size560834	+	20831	114	18414	560834	348363	354199
Ug_unitig_153	None	+	38359	na	na	na	na	na
Ug_unitig_154	None	+	35876	na	na	na	na	na
Ug_unitig_156	None	+	34387	na	na	na	na	na
Ug_unitig_157	None	+	66602	na	na	na	na	na
Ug_unitig_158	None	+	26707	na	na	na	na	na
Ug_unitig_15	None	+	33455	na	na	na	na	na
Ug_unitig_161	scaffold148_size560834	+	33560	5	33558	560834	348363	354199
Ug_unitig_163	None	+	20294	na	na	na	na	na
Ug_unitig_164	None	+	21525	na	na	na	na	na
Ug_unitig_165	scaffold148_size560834	+	22664	6	17664	560834	348363	354199
Ug_unitig_166	None	+	21342	na	na	na	na	na
Ug_unitig_167	None	+	16839	na	na	na	na	na
Ug_unitig_168	None	+	59273	na	na	na	na	na
Ug_unitig_169	None	+	21023	na	na	na	na	na
Ug_unitig_16	scaffold136_size581398	+	29006	9675	14822	581398	244666	257256
Ug_unitig_172	scaffold148_size560834	+	23626	1120	18908	560834	348363	354199
Ug_unitig_173	None	+	17484	na	na	na	na	na
Ug_unitig_174	scaffold148_size560834	+	33087	6276	32264	560834	348363	354199
Ug_unitig_175	scaffold148_size560834	+	15865	3	15168	560834	348363	354199
Ug_unitig_177	scaffold148_size560834	+	27378	4128	27377	560834	334820	354199
Ug_unitig_178	None	+	34976	na	na	na	na	na
Ug_unitig_17	scaffold387_size273758	+	44360	541	12270	273758	9337	29157
Ug_unitig_180	None	+	84521	na	na	na	na	na
Ug_unitig_184	None	+	21969	na	na	na	na	na
Ug_unitig_185	scaffold148_size560834	+	23237	4264	22146	560834	348363	354199
Ug_unitig_186	None	+	32507	na	na	na	na	na
Ug_unitig_187	None	+	32608	na	na	na	na	na
Ug_unitig_188	None	+	22148	na	na	na	na	na
Ug_unitig_189	None	+	32326	na	na	na	na	na
Ug_unitig_18	scaffold570_size149786	+	30282	1073	4146	149786	2832	6709
Ug_unitig_190	None	+	57359	na	na	na	na	na
Ug_unitig_191	None	+	20891	na	na	na	na	na
Ug_unitig_195	None	+	22715	na	na	na	na	na
Ug_unitig_196	None	+	33700	na	na	na	na	na
Ug_unitig_198	None	+	29479	na	na	na	na	na
Ug_unitig_19	scaffold298_size348755	+	37439	13953	37218	348755	213701	231634
Ug_unitig_1	scaffold777_size68218	+	38316	7402	19556	68218	9925	30955
Ug_unitig_200	scaffold148_size560834	+	30956	4238	22912	560834	348363	354199
Ug_unitig_201	None	+	49472	na	na	na	na	na
Ug_unitig_203	scaffold148_size560834	+	22496	5701	22481	560834	348363	354199
Ug_unitig_204	None	+	41173	na	na	na	na	na
Ug_unitig_205	None	+	27273	na	na	na	na	na
Ug_unitig_206	None	+	29650	na	na	na	na	na
Ug_unitig_207	None	+	25628	na	na	na	na	na
Ug_unitig_208	None	+	41501	na	na	na	na	na
Ug_unitig_209	None	+	21604	na	na	na	na	na
Ug_unitig_20	scaffold515_size186375	+	29760	23730	25783	186375	61532	63594
Ug_unitig_210	None	+	44933	na	na	na	na	na
Ug_unitig_211	None	+	18411	na	na	na	na	na
Ug_unitig_213	None	+	35861	na	na	na	na	na
Ug_unitig_214	None	+	29041	na	na	na	na	na
Ug_unitig_215	None	+	136257	na	na	na	na	na
Ug_unitig_217	None	+	26230	na	na	na	na	na
Ug_unitig_218	scaffold148_size560834	+	19737	12	12557	560834	334504	354199
Ug_unitig_219	None	+	25086	na	na	na	na	na
Ug_unitig_21	scaffold30_size1136906	+	3145730	7004	1015251	1136906	334579	424236
Ug_unitig_220	None	+	142718	na	na	na	na	na
Ug_unitig_221	None	+	43499	na	na	na	na	na
Ug_unitig_223	None	+	40701	na	na	na	na	na
Ug_unitig_225	None	+	34776	na	na	na	na	na
Ug_unitig_228	None	+	19152	na	na	na	na	na
Ug_unitig_22	scaffold260_size384151	+	6193689	374360	396391	384151	358560	381154
Ug_unitig_230	None	+	21580	na	na	na	na	na
Ug_unitig_232	None	+	23295	na	na	na	na	na
Ug_unitig_233	None	+	27476	na	na	na	na	na
Ug_unitig_235	None	+	39739	na	na	na	na	na
Ug_unitig_236	None	+	68709	na	na	na	na	na
Ug_unitig_238	None	+	23937	na	na	na	na	na
Ug_unitig_239	None	+	40869	na	na	na	na	na
Ug_unitig_23	scaffold159_size538032	+	35972	845	7102	538032	314653	320123
Ug_unitig_240	None	+	31503	na	na	na	na	na
Ug_unitig_244	None	+	14471	na	na	na	na	na
Ug_unitig_245	scaffold148_size560834	+	16772	1559	16763	560834	348363	361085
Ug_unitig_246	None	+	34727	na	na	na	na	na
Ug_unitig_247	None	+	23077	na	na	na	na	na
Ug_unitig_248	None	+	29396	na	na	na	na	na
Ug_unitig_24	scaffold2_size1816428	+	32202	816	23546	1816428	1426972	1459229
Ug_unitig_250	None	+	30863	na	na	na	na	na
Ug_unitig_252	None	+	18735	na	na	na	na	na
Ug_unitig_253	None	+	106100	na	na	na	na	na
Ug_unitig_254	None	+	17492	na	na	na	na	na
Ug_unitig_255	None	+	28291	na	na	na	na	na
Ug_unitig_256	None	+	60906	na	na	na	na	na
Ug_unitig_257	None	+	28317	na	na	na	na	na
Ug_unitig_258	None	+	23580	na	na	na	na	na
Ug_unitig_259	None	+	18911	na	na	na	na	na
Ug_unitig_25	scaffold275_size367480	+	35544	8041	33509	367480	170118	187395
Ug_unitig_260	None	+	46522	na	na	na	na	na
Ug_unitig_262	None	+	33329	na	na	na	na	na
Ug_unitig_264	None	+	16229	na	na	na	na	na
Ug_unitig_265	None	+	29955	na	na	na	na	na
Ug_unitig_269	scaffold148_size560834	+	22575	1	22573	560834	348363	361109
Ug_unitig_26	scaffold27_size1214473	+	5347415	454739	3282092	1214473	473074	932096
Ug_unitig_270	None	+	19572	na	na	na	na	na
Ug_unitig_272	None	+	26625	na	na	na	na	na
Ug_unitig_273	None	+	34957	na	na	na	na	na
Ug_unitig_274	None	+	18317	na	na	na	na	na
Ug_unitig_276	None	+	43301	na	na	na	na	na
Ug_unitig_277	None	+	23484	na	na	na	na	na
Ug_unitig_278	None	+	15878	na	na	na	na	na
Ug_unitig_279	None	+	27282	na	na	na	na	na
Ug_unitig_27	scaffold155_size543531	+	2143092	1211874	1963839	543531	4744	102367
Ug_unitig_280	None	+	18410	na	na	na	na	na
Ug_unitig_281	None	+	25568	na	na	na	na	na
Ug_unitig_283	None	+	34696	na	na	na	na	na
Ug_unitig_284	None	+	35398	na	na	na	na	na
Ug_unitig_286	None	+	20515	na	na	na	na	na
Ug_unitig_287	None	+	25689	na	na	na	na	na
Ug_unitig_289	None	+	50598	na	na	na	na	na
Ug_unitig_28	scaffold120_size617610	+	34229	4048	13148	617610	305919	313258
Ug_unitig_290	None	+	53381	na	na	na	na	na
Ug_unitig_291	None	+	49235	na	na	na	na	na
Ug_unitig_293	None	+	21570	na	na	na	na	na
Ug_unitig_294	None	+	93520	na	na	na	na	na
Ug_unitig_296	None	+	56574	na	na	na	na	na
Ug_unitig_297	None	+	38123	na	na	na	na	na
Ug_unitig_298	None	+	23994	na	na	na	na	na
Ug_unitig_299	None	+	25726	na	na	na	na	na
Ug_unitig_29	scaffold485_size203089	+	33730	7664	10744	203089	154076	157348
Ug_unitig_2	scaffold333_size321185	+	34481	29519	30249	321185	290924	291639
Ug_unitig_300	None	+	31951	na	na	na	na	na
Ug_unitig_301	None	+	25279	na	na	na	na	na
Ug_unitig_302	None	+	39990	na	na	na	na	na
Ug_unitig_303	None	+	15588	na	na	na	na	na
Ug_unitig_304	None	+	25546	na	na	na	na	na
Ug_unitig_306	None	+	17954	na	na	na	na	na
Ug_unitig_307	None	+	23221	na	na	na	na	na
Ug_unitig_30	scaffold285_size358112	+	17222	4886	7909	358112	192405	195402
Ug_unitig_310	None	+	80154	na	na	na	na	na
Ug_unitig_313	None	+	24735	na	na	na	na	na
Ug_unitig_314	None	+	24511	na	na	na	na	na
Ug_unitig_319	None	+	22330	na	na	na	na	na
Ug_unitig_31	scaffold729_size86916	+	24235	5602	8574	86916	11280	14640
Ug_unitig_320	None	+	27154	na	na	na	na	na
Ug_unitig_322	None	+	26851	na	na	na	na	na
Ug_unitig_324	None	+	48112	na	na	na	na	na
Ug_unitig_326	None	+	59733	na	na	na	na	na
Ug_unitig_327	None	+	43975	na	na	na	na	na
Ug_unitig_32	scaffold5_size1651677	+	3848081	771999	3319381	1651677	120809	1384767
Ug_unitig_330	None	+	15219	na	na	na	na	na
Ug_unitig_331	None	+	30292	na	na	na	na	na
Ug_unitig_332	None	+	23834	na	na	na	na	na
Ug_unitig_334	None	+	22711	na	na	na	na	na
Ug_unitig_335	None	+	17688	na	na	na	na	na
Ug_unitig_336	None	+	19021	na	na	na	na	na
Ug_unitig_338	None	+	23796	na	na	na	na	na
Ug_unitig_33	scaffold647_size119004	+	29563	2148	11395	119004	70352	81538
Ug_unitig_344	None	+	30582	na	na	na	na	na
Ug_unitig_345	None	+	32136	na	na	na	na	na
Ug_unitig_346	None	+	24151	na	na	na	na	na
Ug_unitig_348	None	+	22471	na	na	na	na	na
Ug_unitig_350	None	+	17646	na	na	na	na	na
Ug_unitig_351	None	+	27686	na	na	na	na	na
Ug_unitig_352	None	+	20942	na	na	na	na	na
Ug_unitig_354	None	+	27022	na	na	na	na	na
Ug_unitig_358	None	+	17426	na	na	na	na	na
Ug_unitig_35	scaffold816_size56846	+	39862	38	5614	56846	36304	52254
Ug_unitig_360	None	+	21045	na	na	na	na	na
Ug_unitig_361	None	+	15536	na	na	na	na	na
Ug_unitig_363	None	+	42297	na	na	na	na	na
Ug_unitig_364	None	+	23520	na	na	na	na	na
Ug_unitig_365	None	+	23517	na	na	na	na	na
Ug_unitig_366	None	+	23156	na	na	na	na	na
Ug_unitig_368	None	+	57927	na	na	na	na	na
Ug_unitig_36	None	+	17587	na	na	na	na	na
Ug_unitig_370	None	+	34741	na	na	na	na	na
Ug_unitig_371	None	+	24641	na	na	na	na	na
Ug_unitig_372	None	+	29469	na	na	na	na	na
Ug_unitig_373	None	+	25668	na	na	na	na	na
Ug_unitig_375	None	+	17198	na	na	na	na	na
Ug_unitig_377	None	+	20515	na	na	na	na	na
Ug_unitig_37	scaffold35_size1080921	+	3704653	195715	2758336	1080921	20145	777294
Ug_unitig_382	None	+	24235	na	na	na	na	na
Ug_unitig_385	scaffold205_size458316	+	39199	388	38865	458316	403386	421632
Ug_unitig_387	scaffold205_size458316	+	66327	303	66312	458316	403386	421632
Ug_unitig_388	scaffold205_size458316	+	40742	7	40470	458316	403386	421632
Ug_unitig_38	None	+	28738	na	na	na	na	na
Ug_unitig_390	None	+	21410	na	na	na	na	na
Ug_unitig_393	scaffold205_size458316	+	22383	199	22126	458316	403408	421632
Ug_unitig_398	None	+	14655	na	na	na	na	na
Ug_unitig_399	scaffold205_size458316	+	17440	83	17155	458316	403408	421632
Ug_unitig_39	None	+	42883	na	na	na	na	na
Ug_unitig_3	scaffold65_size853472	+	32391	30824	32383	853472	468740	470198
Ug_unitig_402	None	+	27852	na	na	na	na	na
Ug_unitig_405	None	+	14187	na	na	na	na	na
Ug_unitig_408	None	+	22434	na	na	na	na	na
Ug_unitig_416	scaffold515_size186375	+	22550	3071	5130	186375	61532	63594
Ug_unitig_41	scaffold250_size394352	+	35415	26429	29182	394352	31581	34519
Ug_unitig_42	scaffold104_size664890	+	31510	6548	9531	664890	389768	393687
Ug_unitig_430	None	+	17952	na	na	na	na	na
Ug_unitig_436	None	+	26872	na	na	na	na	na
Ug_unitig_438	None	+	19325	na	na	na	na	na
Ug_unitig_43	scaffold256_size386676	+	31585	2847	27385	386676	327437	350103
Ug_unitig_44	scaffold70_size835982	+	31221	11003	31056	835982	269322	318669
Ug_unitig_453	scaffold205_size458316	+	31202	113	30982	458316	403386	421603
Ug_unitig_45	scaffold470_size212680	+	29727	11115	17810	212680	11199	17183
Ug_unitig_46	scaffold144_size572261	+	3405668	2876198	3240902	572261	114196	434613
Ug_unitig_47	scaffold15_size1429888	+	37863	12475	36179	1429888	36312	56031
Ug_unitig_48	scaffold392_size272084	+	34687	10199	28309	272084	5459	70272
Ug_unitig_49	scaffold40_size1048927	+	27470	13204	20426	1048927	692129	715676
Ug_unitig_4	scaffold223_size435064	+	46931	9713	13517	435064	215989	219929
Ug_unitig_506	None	+	15894	na	na	na	na	na
Ug_unitig_50	scaffold41_size1047198	+	26038	19251	19653	1047198	347633	347918
Ug_unitig_517	None	+	23125	na	na	na	na	na
Ug_unitig_518	None	+	21373	na	na	na	na	na
Ug_unitig_519	None	+	25504	na	na	na	na	na
Ug_unitig_51	scaffold317_size334483	+	29018	4080	6615	334483	172391	174964
Ug_unitig_520	None	+	21099	na	na	na	na	na
Ug_unitig_521	None	+	41867	na	na	na	na	na
Ug_unitig_522	None	+	28028	na	na	na	na	na
Ug_unitig_523	None	+	20345	na	na	na	na	na
Ug_unitig_524	None	+	43561	na	na	na	na	na
Ug_unitig_525	None	+	27173	na	na	na	na	na
Ug_unitig_526	None	+	22465	na	na	na	na	na
Ug_unitig_527	None	+	20710	na	na	na	na	na
Ug_unitig_528	None	+	20677	na	na	na	na	na
Ug_unitig_52	scaffold205_size458316	+	3424836	119	12691	458316	404436	419907
Ug_unitig_530	None	+	29833	na	na	na	na	na
Ug_unitig_531	None	+	16189	na	na	na	na	na
Ug_unitig_532	None	+	26003	na	na	na	na	na
Ug_unitig_534	None	+	15952	na	na	na	na	na
Ug_unitig_536	None	+	14977	na	na	na	na	na
Ug_unitig_537	None	+	20617	na	na	na	na	na
Ug_unitig_538	None	+	44809	na	na	na	na	na
Ug_unitig_539	None	+	29218	na	na	na	na	na
Ug_unitig_53	None	+	43721	na	na	na	na	na
Ug_unitig_540	None	+	33283	na	na	na	na	na
Ug_unitig_543	None	+	59886	na	na	na	na	na
Ug_unitig_544	None	+	26165	na	na	na	na	na
Ug_unitig_545	None	+	29320	na	na	na	na	na
Ug_unitig_546	None	+	13248	na	na	na	na	na
Ug_unitig_547	scaffold130_size602244	+	22588	6666	21698	602244	404336	457182
Ug_unitig_548	scaffold148_size560834	+	29465	1689	29366	560834	348363	354199
Ug_unitig_54	None	+	41219	na	na	na	na	na
Ug_unitig_550	scaffold148_size560834	+	19421	17	17344	560834	348363	354199
Ug_unitig_556	scaffold148_size560834	+	18889	10987	16683	560834	348363	354199
Ug_unitig_557	None	+	71289	na	na	na	na	na
Ug_unitig_558	None	+	17509	na	na	na	na	na
Ug_unitig_55	None	+	63887	na	na	na	na	na
Ug_unitig_560	None	+	24805	na	na	na	na	na
Ug_unitig_561	None	+	17768	na	na	na	na	na
Ug_unitig_562	None	+	35589	na	na	na	na	na
Ug_unitig_563	None	+	23439	na	na	na	na	na
Ug_unitig_564	None	+	23862	na	na	na	na	na
Ug_unitig_565	None	+	24213	na	na	na	na	na
Ug_unitig_566	None	+	23303	na	na	na	na	na
Ug_unitig_567	None	+	21586	na	na	na	na	na
Ug_unitig_568	None	+	33202	na	na	na	na	na
Ug_unitig_569	None	+	24843	na	na	na	na	na
Ug_unitig_56	None	+	18828	na	na	na	na	na
Ug_unitig_570	None	+	23601	na	na	na	na	na
Ug_unitig_571	None	+	21487	na	na	na	na	na
Ug_unitig_573	None	+	14688	na	na	na	na	na
Ug_unitig_574	None	+	17854	na	na	na	na	na
Ug_unitig_576	None	+	59695	na	na	na	na	na
Ug_unitig_577	None	+	68522	na	na	na	na	na
Ug_unitig_578	scaffold344_size316065	+	3547449	1470738	1585711	316065	127081	215370
Ug_unitig_579	scaffold148_size560834	+	32145	1744	29699	560834	348363	354199
Ug_unitig_581	scaffold148_size560834	+	16526	5	16510	560834	348363	354199
Ug_unitig_583	scaffold148_size560834	+	16535	3952	9651	560834	348363	354199
Ug_unitig_587	scaffold148_size560834	+	12344	8	2375	560834	351830	354199
Ug_unitig_588	scaffold264_size378400	+	14427	11789	14421	378400	194551	197347
Ug_unitig_58	None	+	52253	na	na	na	na	na
Ug_unitig_593	scaffold148_size560834	+	13630	6943	12651	560834	348363	354199
Ug_unitig_596	None	+	24285	na	na	na	na	na
Ug_unitig_597	None	+	20252	na	na	na	na	na
Ug_unitig_598	scaffold56_size905644	+	32834	4749	9468	905644	50409	54831
Ug_unitig_599	None	+	17056	na	na	na	na	na
Ug_unitig_5	scaffold168_size520293	+	24795	339	23696	520293	47500	96418
Ug_unitig_600	None	+	33669	na	na	na	na	na
Ug_unitig_601	None	+	19161	na	na	na	na	na
Ug_unitig_603	None	+	21397	na	na	na	na	na
Ug_unitig_60	scaffold40_size1048927	+	1979591	99333	169383	1048927	394986	578066
Ug_unitig_610	None	+	22375	na	na	na	na	na
Ug_unitig_611	None	+	31822	na	na	na	na	na
Ug_unitig_612	None	+	20781	na	na	na	na	na
Ug_unitig_613	None	+	23067	na	na	na	na	na
Ug_unitig_614	None	+	16458	na	na	na	na	na
Ug_unitig_616	None	+	24938	na	na	na	na	na
Ug_unitig_61	scaffold788_size64895	+	1716415	1110329	1125146	64895	4933	19786
Ug_unitig_624	None	+	25237	na	na	na	na	na
Ug_unitig_627	None	+	29316	na	na	na	na	na
Ug_unitig_628	None	+	41133	na	na	na	na	na
Ug_unitig_629	None	+	29219	na	na	na	na	na
Ug_unitig_62	scaffold50_size963328	+	2640391	2340740	2615700	963328	456051	805375
Ug_unitig_630	None	+	27390	na	na	na	na	na
Ug_unitig_631	scaffold148_size560834	+	31143	82	28652	560834	348363	354199
Ug_unitig_635	scaffold148_size560834	+	22996	204	15204	560834	348363	383241
Ug_unitig_637	scaffold148_size560834	+	26264	7643	12004	560834	348390	352893
Ug_unitig_63	scaffold526_size182367	+	39149	33206	39118	182367	49165	54909
Ug_unitig_644	scaffold148_size560834	+	17793	12950	17773	560834	349239	354199
Ug_unitig_646	scaffold148_size560834	+	32561	32	32545	560834	334566	354199
Ug_unitig_648	scaffold148_size560834	+	18569	3327	18567	560834	348363	360888
Ug_unitig_649	scaffold148_size560834	+	32507	3145	23342	560834	348363	354199
Ug_unitig_64	scaffold50_size963328	+	39144	1948	35647	963328	532230	577402
Ug_unitig_650	scaffold148_size560834	+	20059	6471	12179	560834	348363	354199
Ug_unitig_654	scaffold148_size560834	+	19153	1772	18943	560834	348363	383849
Ug_unitig_656	scaffold148_size560834	+	21296	18	16183	560834	348363	370742
Ug_unitig_657	scaffold148_size560834	+	26081	3907	26078	560834	348363	354199
Ug_unitig_659	scaffold148_size560834	+	16179	3	3311	560834	349446	370624
Ug_unitig_65	scaffold11_size1489916	+	29980	89	12804	1489916	755518	797169
Ug_unitig_664	scaffold148_size560834	+	27847	9883	25834	560834	348363	354199
Ug_unitig_667	scaffold148_size560834	+	26686	1580	26675	560834	348363	354199
Ug_unitig_668	scaffold148_size560834	+	27179	3	27172	560834	348363	354199
Ug_unitig_669	scaffold148_size560834	+	19473	2747	19473	560834	348363	354199
Ug_unitig_66	scaffold5_size1651677	+	43016	28961	30985	1651677	1645964	1648164
Ug_unitig_670	scaffold148_size560834	+	19312	301	19198	560834	348363	354199
Ug_unitig_675	scaffold148_size560834	+	24577	2	24457	560834	348363	354199
Ug_unitig_676	scaffold148_size560834	+	30713	2702	29902	560834	348363	354199
Ug_unitig_677	scaffold148_size560834	+	22516	3785	20909	560834	348363	354199
Ug_unitig_678	scaffold148_size560834	+	20682	1209	19739	560834	348363	354199
Ug_unitig_679	scaffold148_size560834	+	26454	1	26413	560834	348363	354199
Ug_unitig_67	None	+	39595	na	na	na	na	na
Ug_unitig_680	scaffold148_size560834	+	18739	5434	18657	560834	348363	382782
Ug_unitig_681	scaffold148_size560834	+	24076	3496	22514	560834	348363	354199
Ug_unitig_682	scaffold148_size560834	+	31169	852	30752	560834	348363	354199
Ug_unitig_683	scaffold148_size560834	+	21063	3192	20035	560834	348363	354199
Ug_unitig_685	scaffold148_size560834	+	18434	1658	18419	560834	348363	354199
Ug_unitig_687	scaffold148_size560834	+	21510	0	16054	560834	348363	354199
Ug_unitig_68	None	+	26805	na	na	na	na	na
Ug_unitig_690	None	+	24262	na	na	na	na	na
Ug_unitig_691	None	+	78582	na	na	na	na	na
Ug_unitig_692	None	+	16185	na	na	na	na	na
Ug_unitig_694	None	+	36270	na	na	na	na	na
Ug_unitig_695	None	+	22684	na	na	na	na	na
Ug_unitig_696	None	+	95408	na	na	na	na	na
Ug_unitig_697	None	+	27654	na	na	na	na	na
Ug_unitig_698	None	+	31175	na	na	na	na	na
Ug_unitig_699	scaffold60_size871532	+	3218251	2907947	2921135	871532	585389	618263
Ug_unitig_6	scaffold526_size182367	+	38022	5060	32733	182367	1145	12386
Ug_unitig_700	None	+	38488	na	na	na	na	na
Ug_unitig_702	None	+	36769	na	na	na	na	na
Ug_unitig_703	None	+	22387	na	na	na	na	na
Ug_unitig_706	None	+	19242	na	na	na	na	na
Ug_unitig_70	scaffold414_size249511	+	20372	3523	5866	249511	68317	70605
Ug_unitig_710	None	+	40272	na	na	na	na	na
Ug_unitig_719	None	+	19846	na	na	na	na	na
Ug_unitig_71	None	+	33702	na	na	na	na	na
Ug_unitig_720	None	+	20194	na	na	na	na	na
Ug_unitig_721	scaffold148_size560834	+	19213	3314	19067	560834	348363	354199
Ug_unitig_722	scaffold148_size560834	+	25757	1080	25749	560834	335430	354199
Ug_unitig_723	scaffold148_size560834	+	26383	16	26380	560834	348363	354199
Ug_unitig_724	scaffold148_size560834	+	17990	3841	17932	560834	348363	354199
Ug_unitig_725	None	+	38221	na	na	na	na	na
Ug_unitig_726	None	+	17143	na	na	na	na	na
Ug_unitig_727	None	+	58404	na	na	na	na	na
Ug_unitig_728	None	+	39894	na	na	na	na	na
Ug_unitig_729	None	+	18074	na	na	na	na	na
Ug_unitig_72	scaffold287_size357018	+	41444	32906	41362	357018	88100	96495
Ug_unitig_730	None	+	74716	na	na	na	na	na
Ug_unitig_731	None	+	21406	na	na	na	na	na
Ug_unitig_732	None	+	23179	na	na	na	na	na
Ug_unitig_733	None	+	36967	na	na	na	na	na
Ug_unitig_734	None	+	21531	na	na	na	na	na
Ug_unitig_735	None	+	23265	na	na	na	na	na
Ug_unitig_736	scaffold268_size372821	+	2629907	817063	891381	372821	231095	313858
Ug_unitig_738	None	+	35010	na	na	na	na	na
Ug_unitig_739	None	+	22425	na	na	na	na	na
Ug_unitig_740	None	+	21703	na	na	na	na	na
Ug_unitig_741	None	+	37748	na	na	na	na	na
Ug_unitig_742	None	+	12144	na	na	na	na	na
Ug_unitig_743	None	+	18958	na	na	na	na	na
Ug_unitig_744	scaffold117_size639039	+	2493952	1952885	1996390	639039	330728	418782
Ug_unitig_745	None	+	81575	na	na	na	na	na
Ug_unitig_746	scaffold29_size1161289	+	943016	14856	719676	1161289	53800	278589
Ug_unitig_747	scaffold60_size871532	+	2569514	298125	1970314	871532	582643	738570
Ug_unitig_748	scaffold414_size249511	+	5667865	820177	835774	249511	229443	246884
Ug_unitig_749	scaffold285_size358112	+	3446356	2992737	3350886	358112	99372	350156
Ug_unitig_750	scaffold34_size1082081	+	298690	71859	234422	1082081	311612	496730
Ug_unitig_751	None	+	30860	na	na	na	na	na
Ug_unitig_753	None	+	24789	na	na	na	na	na
Ug_unitig_757	None	+	50756	na	na	na	na	na
Ug_unitig_758	None	+	31058	na	na	na	na	na
Ug_unitig_759	None	+	17224	na	na	na	na	na
Ug_unitig_75	scaffold58_size900371	+	50036	6171	8487	900371	247092	251722
Ug_unitig_760	None	+	17113	na	na	na	na	na
Ug_unitig_761	None	+	13758	na	na	na	na	na
Ug_unitig_763	None	+	22069	na	na	na	na	na
Ug_unitig_764	None	+	15133	na	na	na	na	na
Ug_unitig_765	None	+	22471	na	na	na	na	na
Ug_unitig_766	None	+	43011	na	na	na	na	na
Ug_unitig_767	None	+	14368	na	na	na	na	na
Ug_unitig_76	scaffold424_size243908	+	59519	3934	38629	243908	78774	116620
Ug_unitig_771	None	+	87035	na	na	na	na	na
Ug_unitig_772	None	+	19558	na	na	na	na	na
Ug_unitig_773	None	+	22936	na	na	na	na	na
Ug_unitig_774	None	+	14759	na	na	na	na	na
Ug_unitig_776	None	+	27234	na	na	na	na	na
Ug_unitig_777	None	+	20492	na	na	na	na	na
Ug_unitig_778	None	+	33962	na	na	na	na	na
Ug_unitig_779	None	+	75494	na	na	na	na	na
Ug_unitig_77	scaffold27_size1214473	+	19823	8975	17088	1214473	600277	608471
Ug_unitig_780	None	+	19435	na	na	na	na	na
Ug_unitig_781	None	+	21615	na	na	na	na	na
Ug_unitig_782	None	+	13107	na	na	na	na	na
Ug_unitig_783	scaffold148_size560834	+	94555	83412	89101	560834	348375	354199
Ug_unitig_789	scaffold148_size560834	+	19031	5985	11690	560834	348363	354199
Ug_unitig_78	scaffold631_size125893	+	32734	7035	31227	125893	68682	91471
Ug_unitig_790	scaffold148_size560834	+	20246	3540	20213	560834	348363	354199
Ug_unitig_791	scaffold148_size560834	+	19271	2999	19246	560834	348363	354199
Ug_unitig_792	scaffold148_size560834	+	18613	2637	18611	560834	334504	354199
Ug_unitig_796	scaffold148_size560834	+	18639	47	18477	560834	348363	354199
Ug_unitig_797	scaffold148_size560834	+	22109	7	18823	560834	348363	354199
Ug_unitig_798	scaffold148_size560834	+	36953	4772	33766	560834	343403	354199
Ug_unitig_7	scaffold45_size1012159	+	29640	16571	20065	1012159	905173	908528
Ug_unitig_800	scaffold148_size560834	+	18040	1811	18038	560834	348363	354199
Ug_unitig_805	scaffold148_size560834	+	19884	3098	19845	560834	348363	354199
Ug_unitig_807	scaffold148_size560834	+	24671	21	17069	560834	348363	354199
Ug_unitig_809	scaffold148_size560834	+	19798	188	15201	560834	348363	354199
Ug_unitig_80	None	+	117917	na	na	na	na	na
Ug_unitig_813	scaffold148_size560834	+	28897	1	27632	560834	348363	354199
Ug_unitig_814	scaffold148_size560834	+	17486	3481	9175	560834	348363	354199
Ug_unitig_817	scaffold148_size560834	+	21269	0	21119	560834	348363	354199
Ug_unitig_81	None	+	89329	na	na	na	na	na
Ug_unitig_820	scaffold148_size560834	+	30760	26353	30743	560834	348363	352893
Ug_unitig_822	scaffold148_size560834	+	27419	15348	21055	560834	348363	354199
Ug_unitig_823	scaffold148_size560834	+	20065	3654	20049	560834	348363	354199
Ug_unitig_826	scaffold148_size560834	+	18623	12	17586	560834	348363	354199
Ug_unitig_827	scaffold148_size560834	+	20703	7	15173	560834	348363	354199
Ug_unitig_82	scaffold387_size273758	+	880676	144006	155370	273758	9627	25751
Ug_unitig_830	scaffold148_size560834	+	20580	4036	20576	560834	348363	354199
Ug_unitig_833	scaffold148_size560834	+	26234	629	26232	560834	348363	361309
Ug_unitig_834	scaffold148_size560834	+	19360	4768	19315	560834	348363	383512
Ug_unitig_836	scaffold148_size560834	+	17482	2966	17475	560834	348363	354199
Ug_unitig_838	scaffold148_size560834	+	31457	2188	31456	560834	348363	354199
Ug_unitig_839	scaffold148_size560834	+	17717	4151	17711	560834	348363	360757
Ug_unitig_840	None	+	24626	na	na	na	na	na
Ug_unitig_842	scaffold515_size186375	+	26641	21471	23524	186375	61532	63594
Ug_unitig_843	scaffold515_size186375	+	20058	10011	12068	186375	61532	63594
Ug_unitig_844	scaffold515_size186375	+	14799	5911	7968	186375	61532	63594
Ug_unitig_846	scaffold515_size186375	+	192884	2228	4287	186375	61532	63594
Ug_unitig_847	None	+	30475	na	na	na	na	na
Ug_unitig_848	None	+	40695	na	na	na	na	na
Ug_unitig_84	None	+	60824	na	na	na	na	na
Ug_unitig_850	None	+	14865	na	na	na	na	na
Ug_unitig_851	None	+	16027	na	na	na	na	na
Ug_unitig_852	None	+	27933	na	na	na	na	na
Ug_unitig_854	None	+	32272	na	na	na	na	na
Ug_unitig_855	None	+	35480	na	na	na	na	na
Ug_unitig_85	scaffold408_size254463	+	739299	25221	130179	254463	111345	207168
Ug_unitig_861	None	+	27093	na	na	na	na	na
Ug_unitig_864	None	+	28783	na	na	na	na	na
Ug_unitig_867	None	+	18535	na	na	na	na	na
Ug_unitig_869	None	+	33680	na	na	na	na	na
Ug_unitig_86	scaffold278_size365576	+	35077	18091	35066	365576	89584	138870
Ug_unitig_870	None	+	43540	na	na	na	na	na
Ug_unitig_871	None	+	33523	na	na	na	na	na
Ug_unitig_872	scaffold148_size560834	+	21888	199	21860	560834	348363	354199
Ug_unitig_873	scaffold148_size560834	+	20877	7712	13420	560834	348363	354199
Ug_unitig_874	scaffold148_size560834	+	18770	5858	11565	560834	348363	354199
Ug_unitig_881	scaffold130_size602244	+	38805	4692	30215	602244	404336	457182
Ug_unitig_882	scaffold148_size560834	+	18482	6	17847	560834	348363	354199
Ug_unitig_885	scaffold148_size560834	+	16905	28	16897	560834	348363	354199
Ug_unitig_889	scaffold148_size560834	+	17436	5730	11428	560834	348363	354199
Ug_unitig_88	scaffold650_size116903	+	700450	361689	396972	116903	9853	33063
Ug_unitig_892	scaffold148_size560834	+	19824	4485	19704	560834	348363	354199
Ug_unitig_893	scaffold148_size560834	+	20750	3800	20747	560834	348363	354199
Ug_unitig_897	None	+	91363	na	na	na	na	na
Ug_unitig_898	None	+	42998	na	na	na	na	na
Ug_unitig_899	scaffold354_size300507	+	3453940	1988319	2041224	300507	76137	135278
Ug_unitig_8	scaffold447_size226588	+	6822880	1531049	1740307	226588	37974	223088
Ug_unitig_90	scaffold151_size559051	+	643527	57680	572520	559051	289	174113
Ug_unitig_92	scaffold35_size1080921	+	455599	228266	382408	1080921	39020	280319
Ug_unitig_93	scaffold60_size871532	+	28630	9038	28534	871532	406703	451658
Ug_unitig_94	scaffold1027_size23586	+	381937	58357	65148	23586	1678	12065
Ug_unitig_95	None	+	17444	na	na	na	na	na
Ug_unitig_96	scaffold148_size560834	+	27821	5249	24302	560834	348363	354199
Ug_unitig_97	None	+	35152	na	na	na	na	na
Ug_unitig_99	scaffold148_size560834	+	36374	1927	35492	560834	348363	354199
Ug_unitig_9	scaffold1196_size13094	+	37215	26250	28863	13094	6173	8548

## Sheet: Urenif Vs Athaliana
Query	Target	Strand	Q-len	Q-start	Q-stop	T-len	T-start	T-stop
scaffold888_size40586	Chr1	+	40586	730	1777	30427671	92595	93577
scaffold991_size26200	Chr1	-	26200	730	1777	30427671	92595	93577
scaffold168_size520293	Chr1	+	520293	27846	28189	30427671	188056	188419
scaffold254_size388685	Chr1	+	388685	730	249355	30427671	92595	25932144
scaffold695_size97738	Chr1	-	97738	1476	5447	30427671	332793	336829
scaffold729_size86916	Chr1	-	86916	80317	84288	30427671	332793	336829
scaffold1_size1862935	Chr1	+	1862935	668879	1282547	30427671	332793	23933206
scaffold246_size398760	Chr1	+	398760	14619	17638	30427671	716634	719749
scaffold698_size97389	Chr1	+	97389	60466	60537	30427671	892515	892586
scaffold522_size183876	Chr1	+	183876	84247	84311	30427671	892522	892586
scaffold460_size220093	Chr1	+	220093	138013	139222	30427671	1062120	1063338
scaffold909_size36614	Chr1	+	36614	23272	24481	30427671	1062120	1063338
scaffold551_size162907	Chr1	+	162907	2171	3466	30427671	1067990	1069274
scaffold60_size871532	Chr1	+	871532	721115	722603	30427671	1186215	1187796
scaffold879_size42848	Chr1	-	42848	12723	14211	30427671	1186215	1187796
scaffold341_size317742	Chr1	+	317742	99503	100307	30427671	1199337	1200141
scaffold291_size352991	Chr1	+	352991	42681	42730	30427671	1215767	1215816
scaffold622_size128123	Chr1	+	128123	97704	99306	30427671	1356577	1358189
scaffold476_size209410	Chr1	+	209410	85125	85980	30427671	2307613	2308489
scaffold473_size210511	Chr1	+	210511	76561	77888	30427671	2459110	2460437
scaffold265_size376597	Chr1	+	376597	261273	262384	30427671	2455558	2464792
scaffold142_size574908	Chr1	+	574908	408610	410151	30427671	2478200	2479616
scaffold951_size30028	Chr1	+	30028	8116	9226	30427671	2780414	2781498
scaffold167_size520804	Chr1	+	520804	32006	33915	30427671	2780414	2782374
scaffold91_size726399	Chr1	+	726399	20470	662266	30427671	2589351	2787684
scaffold144_size572261	Chr1	+	572261	123839	251440	30427671	2780414	4842343
scaffold1360_size8115	Chr1	+	8115	5503	5710	30427671	2819787	2820030
scaffold731_size85304	Chr1	+	85304	35532	36074	30427671	2975453	2975932
scaffold125_size608205	Chr1	+	608205	202582	558536	30427671	1265194	26565118
scaffold390_size273192	Chr1	+	273192	25984	27280	30427671	3162559	3163876
scaffold21_size1333958	Chr1	+	1333958	706058	1138357	30427671	3162559	23802639
scaffold532_size179252	Chr1	+	179252	38931	106335	30427671	741035	5401053
scaffold778_size68176	Chr1	+	68176	13840	14666	30427671	3513368	3514204
scaffold80_size769704	Chr1	+	769704	37314	356465	30427671	1356577	24840268
scaffold493_size200783	Chr1	+	200783	164609	164664	30427671	4522707	4522762
scaffold816_size56846	Chr1	+	56846	36585	37488	30427671	4608707	4609685
scaffold611_size132032	Chr1	+	132032	1495	3122	30427671	4608920	4610380
scaffold598_size135460	Chr1	+	135460	49904	49987	30427671	1324923	7884455
scaffold659_size114351	Chr1	+	114351	77478	77535	30427671	2939421	6995348
scaffold443_size229734	Chr1	+	229734	114447	174565	30427671	3513540	8558131
scaffold478_size208472	Chr1	+	208472	73675	77561	30427671	2174573	10099488
scaffold606_size133267	Chr1	+	133267	40982	42129	30427671	5400296	5401546
scaffold350_size304998	Chr1	+	304998	159795	161915	30427671	5739521	5741767
scaffold1563_size5169	Chr1	+	5169	1268	1348	30427671	3676607	7884453
scaffold208_size452143	Chr1	+	452143	171281	171362	30427671	3676607	7884455
scaffold118_size635519	Chr1	+	635519	346114	371070	30427671	6019316	27474708
scaffold228_size428413	Chr1	+	428413	18540	18604	30427671	4741999	9158247
scaffold243_size401479	Chr1	+	401479	79084	387637	30427671	4608920	22280013
scaffold930_size32777	Chr1	-	32777	22344	32200	30427671	1356967	20412999
scaffold613_size131457	Chr1	+	131457	19038	28894	30427671	1356967	20412999
scaffold27_size1214473	Chr1	+	1214473	399689	401369	30427671	6947281	6948936
scaffold283_size361165	Chr1	+	361165	32632	47114	30427671	6888854	25941223
scaffold42_size1040323	Chr1	+	1040323	321535	763617	30427671	4639134	20791386
scaffold72_size829870	Chr1	+	829870	325040	712367	30427671	309275	12867702
scaffold505_size193468	Chr1	+	193468	65255	65456	30427671	7592975	7593176
scaffold152_size557608	Chr1	+	557608	88395	543611	30427671	4842273	7756188
scaffold173_size512803	Chr1	+	512803	386510	387523	30427671	7755148	7756188
scaffold229_size422993	Chr1	+	422993	98624	164033	30427671	2455655	18783974
scaffold1037_size22605	Chr1	+	22605	8284	8354	30427671	2846542	20412999
scaffold196_size466988	Chr1	+	466988	45380	47325	30427671	8063692	8065677
scaffold761_size73556	Chr1	+	73556	73304	73368	30427671	2846543	20412999
scaffold389_size273484	Chr1	+	273484	214681	215176	30427671	8687088	8687604
scaffold67_size845796	Chr1	+	845796	322974	351561	30427671	8389495	9615611
scaffold487_size202209	Chr1	+	202209	93289	94129	30427671	9302007	9302870
scaffold671_size110097	Chr1	+	110097	87206	105347	30427671	9079008	9615611
scaffold220_size437153	Chr1	+	437153	125877	126633	30427671	9601758	9602505
scaffold308_size341706	Chr1	+	341706	12259	15497	30427671	10093746	10099493
scaffold734_size82491	Chr1	+	82491	70621	70694	30427671	10090367	10106162
scaffold580_size143028	Chr1	+	143028	3601	3660	30427671	10207325	10207384
scaffold797_size62438	Chr1	+	62438	31741	31800	30427671	10207325	10207384
scaffold282_size362278	Chr1	+	362278	8789	8865	30427671	877647	18135669
scaffold649_size118696	Chr1	+	118696	29060	29128	30427671	3914628	22866825
scaffold339_size318728	Chr1	+	318728	300584	303051	30427671	10797021	10799482
scaffold400_size262257	Chr1	+	262257	84525	172224	30427671	3229552	16060506
scaffold275_size367480	Chr1	+	367480	208144	255672	30427671	3513778	26565118
scaffold970_size27896	Chr1	+	27896	24045	26405	30427671	3513778	26565118
scaffold1239_size10982	Chr1	+	10982	7	70	30427671	10092325	17160591
scaffold694_size97836	Chr1	+	97836	62589	62821	30427671	11673857	11674182
scaffold211_size447269	Chr1	+	447269	439828	440047	30427671	11684932	11685148
scaffold559_size158248	Chr1	+	158248	71574	71791	30427671	11684932	11685148
scaffold486_size202863	Chr1	+	202863	103332	103406	30427671	5189686	26049534
scaffold1029_size23488	Chr1	+	23488	10245	10319	30427671	5189686	26049534
scaffold175_size507515	Chr1	+	507515	33055	465126	30427671	7996065	30087277
scaffold128_size606351	Chr1	+	606351	539294	540751	30427671	9296877	26203160
scaffold461_size219499	Chr1	+	219499	150308	189627	30427671	9301736	16060506
scaffold378_size277705	Chr1	+	277705	212214	245943	30427671	8520294	16060506
scaffold858_size45924	Chr1	+	45924	41206	41287	30427671	3676607	29444009
scaffold30_size1136906	Chr1	+	1136906	188926	1094660	30427671	2360266	15613007
scaffold999_size25422	Chr1	+	25422	17278	17352	30427671	10101600	17161043
scaffold256_size386676	Chr1	+	386676	292486	292559	30427671	3881535	18557975
scaffold244_size401050	Chr1	+	401050	398394	399179	30427671	3513368	26565118
scaffold79_size776185	Chr1	+	776185	68891	601811	30427671	5502657	29140698
scaffold773_size69822	Chr1	+	69822	56789	56838	30427671	3678797	22477839
scaffold189_size480584	Chr1	+	480584	13414	14044	30427671	6524689	28082050
scaffold71_size832853	Chr1	+	832853	275981	677704	30427671	5502657	26421696
scaffold192_size479242	Chr1	+	479242	433181	433998	30427671	16059698	16060506
scaffold342_size317645	Chr1	+	317645	196373	197073	30427671	16059815	16060506
scaffold635_size123795	Chr1	+	123795	103219	103918	30427671	16059815	16060506
scaffold811_size58044	Chr1	+	58044	48965	49081	30427671	16060480	16060596
scaffold428_size240870	Chr1	+	240870	11553	22209	30427671	4639134	27368650
scaffold501_size196671	Chr1	+	196671	50187	50378	30427671	16267882	16268073
scaffold401_size261616	Chr1	+	261616	73084	74918	30427671	5114144	25513456
scaffold26_size1224954	Chr1	+	1224954	656054	1010628	30427671	8258238	17105510
scaffold40_size1048927	Chr1	+	1048927	246760	246822	30427671	6488673	28028040
scaffold838_size51646	Chr1	+	51646	21283	21361	30427671	17310757	17310835
scaffold161_size531985	Chr1	+	531985	213528	458810	30427671	4774046	25886612
scaffold511_size188204	Chr1	+	188204	22158	22814	30427671	17876476	17877132
scaffold651_size116853	Chr1	+	116853	16658	16815	30427671	17940621	17940778
scaffold430_size239863	Chr1	+	239863	103693	225611	30427671	2840662	18783974
scaffold314_size338820	Chr1	+	338820	32739	53423	30427671	4173202	23235767
scaffold379_size277413	Chr1	+	277413	32634	189955	30427671	16059815	27113269
scaffold1122_size16511	Chr1	+	16511	6555	6801	30427671	18337071	18337338
scaffold328_size323540	Chr1	+	323540	223981	224872	30427671	18371943	18372839
scaffold225_size433522	Chr1	+	433522	18675	20706	30427671	18395719	18397756
scaffold949_size30103	Chr1	+	30103	2454	2527	30427671	5309646	30174086
scaffold102_size677817	Chr1	+	677817	91565	660147	30427671	18230500	19887955
scaffold116_size639307	Chr1	+	639307	259408	380713	30427671	20715934	20791394
scaffold147_size561064	Chr1	+	561064	337963	338810	30427671	20969622	20970488
scaffold541_size172255	Chr1	+	172255	6888	7735	30427671	20969622	20970488
scaffold180_size499775	Chr1	+	499775	45151	259959	30427671	48223	28527833
scaffold454_size223947	Chr1	+	223947	57240	220636	30427671	309275	26565118
scaffold457_size221634	Chr1	+	221634	197658	197721	30427671	21270304	21883915
scaffold548_size165573	Chr1	+	165573	58144	59906	30427671	21592258	21594044
scaffold377_size278145	Chr1	+	278145	6237	6708	30427671	21689336	21689807
scaffold114_size641222	Chr1	+	641222	279395	280937	30427671	22018147	22019766
scaffold164_size528297	Chr1	+	528297	16032	16767	30427671	22583558	22584319
scaffold735_size82422	Chr1	+	82422	74523	74586	30427671	21277869	30237855
scaffold978_size26980	Chr1	+	26980	3506	3770	30427671	23085474	23085741
scaffold1423_size6920	Chr1	+	6920	3631	3673	30427671	23667513	23667555
scaffold445_size228148	Chr1	+	228148	21561	160767	30427671	19134834	23775545
scaffold540_size172311	Chr1	+	172311	51625	52200	30427671	23826390	23826965
scaffold335_size320703	Chr1	+	320703	183120	183973	30427671	24556049	24556986
scaffold530_size179357	Chr1	+	179357	48238	136942	30427671	9143809	27237278
scaffold366_size288142	Chr1	+	288142	280668	282118	30427671	25314421	25315881
scaffold703_size94923	Chr1	+	94923	87391	87529	30427671	25329640	25329778
scaffold786_size65005	Chr1	+	65005	7394	7532	30427671	25329640	25329778
scaffold77_size793173	Chr1	+	793173	208785	209654	30427671	25440866	25441674
scaffold281_size362804	Chr1	+	362804	142808	261107	30427671	4522707	25513456
scaffold43_size1025288	Chr1	+	1025288	422272	426458	30427671	25823306	25827419
scaffold614_size131169	Chr1	+	131169	12546	12614	30427671	26348951	26349019
scaffold11_size1489916	Chr1	+	1489916	1145400	1149278	30427671	5418735	30266388
scaffold258_size385168	Chr1	+	385168	383167	384117	30427671	26420765	26421696
scaffold1510_size5781	Chr1	-	5781	2927	4105	30427671	20266412	27368650
scaffold47_size1002735	Chr1	+	1002735	305761	580864	30427671	20064298	29002279
scaffold97_size696948	Chr1	+	696948	50569	52997	30427671	27233836	27236234
scaffold523_size183550	Chr1	+	183550	87931	89871	30427671	27234962	27236477
scaffold919_size34446	Chr1	+	34446	5832	7780	30427671	27234962	27236477
scaffold117_size639039	Chr1	+	639039	276433	584493	30427671	519187	27673149
scaffold604_size133642	Chr1	+	133642	14178	14498	30427671	27617470	27617795
scaffold190_size480112	Chr1	+	480112	4987	5268	30427671	27731580	27731867
scaffold32_size1119335	Chr1	+	1119335	291912	301955	30427671	27924431	27926074
scaffold107_size656107	Chr1	+	656107	104406	649966	30427671	26884627	29149582
scaffold436_size236557	Chr1	+	236557	231542	231992	30427671	28614192	28614654
scaffold274_size368324	Chr1	+	368324	30880	31258	30427671	28979473	28979851
scaffold459_size221187	Chr1	+	221187	41483	41696	30427671	29100312	29100525
scaffold524_size182843	Chr1	+	182843	112706	112919	30427671	29100312	29100525
scaffold98_size696804	Chr1	+	696804	326207	330140	30427671	30122009	30125818
scaffold625_size127502	Chr2	+	127502	29453	29880	19698289	5797	6187
scaffold325_size324394	Chr2	+	324394	196395	196513	19698289	8528	8644
scaffold689_size99217	Chr2	+	99217	79393	79821	19698289	12264	12692
scaffold259_size384786	Chr2	+	384786	98575	330975	19698289	3699	9580511
scaffold675_size109163	Chr2	+	109163	23385	74050	19698289	6138	10813902
scaffold201_size464543	Chr2	+	464543	7197	7553	19698289	433123	433482
scaffold288_size356667	Chr2	+	356667	31913	33400	19698289	452687	454123
scaffold1534_size5505	Chr2	-	5505	3968	5457	19698289	452687	454123
scaffold869_size44510	Chr2	+	44510	15274	15352	19698289	863597	863675
scaffold264_size378400	Chr2	+	378400	193558	284222	19698289	3703	12172465
scaffold159_size538032	Chr2	+	538032	268149	270268	19698289	1282501	1284720
scaffold368_size285942	Chr2	+	285942	19666	77727	19698289	1391499	1871756
scaffold624_size127768	Chr2	+	127768	113257	113472	19698289	1575024	1575239
scaffold28_size1211183	Chr2	+	1211183	1107113	1108810	19698289	2339643	2341325
scaffold177_size501284	Chr2	+	501284	57602	313458	19698289	3730	5878563
scaffold304_size344087	Chr2	+	344087	190375	193037	19698289	3170587	3173175
scaffold420_size247594	Chr2	+	247594	57712	60374	19698289	3170587	3173175
scaffold1145_size15395	Chr2	+	15395	2055	4717	19698289	3170587	3173175
scaffold336_size320595	Chr2	+	320595	272698	281043	19698289	3333574	3337624
scaffold137_size581237	Chr2	+	581237	2774	233533	19698289	3171657	18134884
scaffold348_size306083	Chr2	+	306083	273566	273608	19698289	3397768	3397810
scaffold156_size543371	Chr2	+	543371	513738	513800	19698289	3401610	3401672
scaffold120_size617610	Chr2	+	617610	314610	447048	19698289	363724	9507769
scaffold9_size1555044	Chr2	+	1555044	466433	1420656	19698289	5298	19402718
scaffold397_size264925	Chr2	+	264925	142868	142934	19698289	5688005	5688071
scaffold272_size369917	Chr2	+	369917	4833	138202	19698289	917492	18771048
scaffold536_size174755	Chr2	+	174755	146566	147551	19698289	8994856	8995874
scaffold8_size1575602	Chr2	+	1575602	712140	815806	19698289	849774	9414222
scaffold852_size47091	Chr2	+	47091	28509	28612	19698289	9627980	9628086
scaffold235_size415264	Chr2	+	415264	63400	63724	19698289	10015977	10016301
scaffold627_size127100	Chr2	+	127100	88578	89447	19698289	10274522	10275402
scaffold48_size992202	Chr2	+	992202	9415	754582	19698289	9285431	17736262
scaffold23_size1301348	Chr2	+	1301348	185	2832	19698289	11515391	11518103
scaffold38_size1053794	Chr2	+	1053794	623060	625719	19698289	11515391	11518103
scaffold439_size236221	Chr2	+	236221	128687	128920	19698289	11532829	11533062
scaffold479_size206789	Chr2	+	206789	201604	201653	19698289	12999861	12999910
scaffold725_size88532	Chr2	+	88532	41237	41286	19698289	12999861	12999910
scaffold237_size412359	Chr2	+	412359	333800	342635	19698289	846851	13599093
scaffold157_size542792	Chr2	+	542792	398121	398570	19698289	13773071	13773557
scaffold488_size202194	Chr2	+	202194	2140	152545	19698289	102064	14095273
scaffold647_size119004	Chr2	+	119004	111488	114068	19698289	14092776	14095273
scaffold885_size41222	Chr2	+	41222	4936	7516	19698289	14092776	14095273
scaffold309_size341406	Chr2	+	341406	80491	137969	19698289	14463304	14464247
scaffold331_size322110	Chr2	+	322110	276536	276874	19698289	14523041	14523379
scaffold113_size644116	Chr2	+	644116	585384	592087	19698289	14603834	14610792
scaffold105_size659173	Chr2	+	659173	524497	526682	19698289	15321750	15323755
scaffold470_size212680	Chr2	+	212680	56143	60385	19698289	15651302	15655482
scaffold96_size698077	Chr2	+	698077	53827	54410	19698289	16478427	16479010
scaffold50_size963328	Chr2	+	963328	745412	746966	19698289	16932226	16933811
scaffold185_size485439	Chr2	+	485439	365086	365378	19698289	17140899	17141191
scaffold456_size221644	Chr2	+	221644	153656	153715	19698289	17654763	17654822
scaffold416_size249014	Chr2	+	249014	191526	191862	19698289	17748100	17748436
scaffold713_size91867	Chr2	+	91867	5758	6094	19698289	17748100	17748436
scaffold1233_size11201	Chr2	-	11201	3992	5833	19698289	18119826	18121647
scaffold1234_size11197	Chr2	+	11197	3992	5829	19698289	18119826	18121647
scaffold126_size606685	Chr2	+	606685	169510	169828	19698289	18728143	18728473
scaffold923_size34232	Chr2	+	34232	1736	2054	19698289	18728143	18728473
scaffold519_size185338	Chr2	+	185338	92083	92381	19698289	18928725	18929023
scaffold7_size1580086	Chr2	+	1580086	1317032	1331469	19698289	19358168	19402718
scaffold174_size508446	Chr3	+	508446	371685	371872	23459830	109843	110081
scaffold520_size185269	Chr3	+	185269	168738	169790	23459830	470707	471766
scaffold65_size853472	Chr3	+	853472	344986	346931	23459830	689544	691508
scaffold940_size31079	Chr3	-	31079	13369	14701	23459830	690135	691467
scaffold556_size159941	Chr3	+	159941	94755	95721	23459830	959730	960652
scaffold351_size304134	Chr3	+	304134	54151	65489	23459830	1309832	22138791
scaffold99_size687872	Chr3	+	687872	437512	438616	23459830	2213139	2214313
scaffold628_size126813	Chr3	+	126813	40441	43144	23459830	2266169	2268818
scaffold6_size1644274	Chr3	+	1644274	783739	788591	23459830	2266169	2270918
scaffold718_size90744	Chr3	+	90744	2440	2548	23459830	2457584	2457692
scaffold316_size337115	Chr3	+	337115	99814	335879	23459830	1738798	5068362
scaffold372_size281874	Chr3	+	281874	180983	187469	23459830	2587751	3486029
scaffold678_size107199	Chr3	+	107199	94374	96393	23459830	2903434	2905431
scaffold354_size300507	Chr3	+	300507	107205	134612	23459830	433598	20470190
scaffold202_size463854	Chr3	+	463854	27217	82017	23459830	2904416	20813584
scaffold271_size370178	Chr3	+	370178	187541	187658	23459830	3943267	3943384
scaffold728_size87572	Chr3	+	87572	77821	78456	23459830	3990179	3990838
scaffold203_size463369	Chr3	+	463369	1460	12772	23459830	1220233	4115597
scaffold1523_size5678	Chr3	-	5678	2029	4218	23459830	4113413	4115597
scaffold441_size232911	Chr3	+	232911	159751	160110	23459830	4587798	4588174
scaffold170_size519258	Chr3	+	519258	159453	160112	23459830	4659100	4659759
scaffold183_size488004	Chr3	+	488004	199411	433033	23459830	959730	5217983
scaffold1185_size13504	Chr3	-	13504	182	838	23459830	5021306	5021976
scaffold251_size391187	Chr3	+	391187	53578	222405	23459830	5026645	11327036
scaffold958_size29003	Chr3	+	29003	18150	18592	23459830	5217516	5217973
scaffold594_size138683	Chr3	+	138683	72297	72738	23459830	5315449	5315977
scaffold1253_size10626	Chr3	-	10626	10038	10479	23459830	5315449	5315977
scaffold330_size322938	Chr3	+	322938	95998	98613	23459830	5543297	5545784
scaffold298_size348755	Chr3	+	348755	145280	321724	23459830	1601342	18826101
scaffold623_size127870	Chr3	+	127870	92225	92775	23459830	5953072	5953622
scaffold633_size124080	Chr3	+	124080	10871	11598	23459830	6098645	6099345
scaffold1126_size16433	Chr3	+	16433	14931	15393	23459830	6175651	6176126
scaffold1542_size5399	Chr3	+	5399	29	338	23459830	6175804	6176126
scaffold285_size358112	Chr3	+	358112	109265	349764	23459830	1601342	23455156
scaffold687_size100329	Chr3	+	100329	57291	57345	23459830	6865193	6865247
scaffold1203_size12743	Chr3	+	12743	2510	4183	23459830	6880425	6880752
scaffold337_size319475	Chr3	+	319475	56910	200377	23459830	2903922	12552611
scaffold375_size279719	Chr3	+	279719	87252	90755	23459830	7427420	7430948
scaffold577_size145990	Chr3	+	145990	10083	60748	23459830	5952636	14200794
scaffold544_size169404	Chr3	+	169404	161641	161908	23459830	7498388	7498654
scaffold327_size324060	Chr3	+	324060	149317	151682	23459830	8317638	8320069
scaffold296_size349755	Chr3	+	349755	6631	71211	23459830	2457584	16597954
scaffold890_size40149	Chr3	+	40149	6810	7327	23459830	8735166	8735702
scaffold155_size543531	Chr3	+	543531	157157	169360	23459830	8695634	22611477
scaffold426_size243431	Chr3	+	243431	34742	52330	23459830	1248491	11340274
scaffold197_size466181	Chr3	+	466181	137576	367898	23459830	586094	9146002
scaffold849_size47571	Chr3	+	47571	11501	11976	23459830	10132038	10132516
scaffold266_size374472	Chr3	+	374472	220682	277174	23459830	4561113	10332321
scaffold269_size371661	Chr3	+	371661	261363	262284	23459830	6475698	17129618
scaffold432_size238105	Chr3	+	238105	16933	18806	23459830	9796594	21959552
scaffold435_size236645	Chr3	+	236645	188157	190292	23459830	10872585	10874781
scaffold819_size56302	Chr3	+	56302	13597	14775	23459830	11325031	11326201
scaffold305_size343860	Chr3	+	343860	31885	34835	23459830	11326186	11340274
scaffold396_size267761	Chr3	+	267761	211495	214444	23459830	11326186	11340274
scaffold475_size210170	Chr3	+	210170	159414	161064	23459830	11338567	11340274
scaffold458_size221370	Chr3	+	221370	25048	114734	23459830	957612	18789402
scaffold49_size979919	Chr3	+	979919	354008	838724	23459830	11338567	21042018
scaffold5_size1651677	Chr3	+	1651677	574408	575443	23459830	11421436	11422474
scaffold87_size752611	Chr3	+	752611	101989	145288	23459830	11977395	21346813
scaffold176_size503880	Chr3	+	503880	59639	305475	23459830	5217709	12552611
scaffold572_size148818	Chr3	+	148818	11348	11407	23459830	4254536	22611477
scaffold788_size64895	Chr3	-	64895	3910	19262	23459830	13563696	21042018
scaffold39_size1053542	Chr3	+	1053542	488571	738522	23459830	13563696	21042018
scaffold19_size1367837	Chr3	+	1367837	75568	1055645	23459830	3942006	19924421
scaffold205_size458316	Chr3	-	458316	37700	416129	23459830	2178257	13861729
scaffold130_size602244	Chr3	+	602244	401696	507174	23459830	13563696	14203453
scaffold16_size1429268	Chr3	+	1429268	679941	1345662	23459830	7319580	14203403
scaffold148_size560834	Chr3	+	560834	174362	385069	23459830	1601342	14203453
scaffold250_size394352	Chr3	+	394352	374173	382175	23459830	14197696	14203403
scaffold360_size294240	Chr3	+	294240	22107	38507	23459830	14197696	14203403
scaffold516_size186372	Chr3	+	186372	81682	82351	23459830	14200753	14201415
scaffold528_size179813	Chr3	+	179813	24021	24117	23459830	14201548	14201644
scaffold1361_size8112	Chr3	+	8112	5461	5539	23459830	14202227	14202305
scaffold230_size422617	Chr3	+	422617	53835	57902	23459830	14202342	14202615
scaffold344_size316065	Chr3	+	316065	119910	120218	23459830	14202763	14203158
scaffold88_size749664	Chr3	+	749664	351916	710872	23459830	14198403	14865371
scaffold215_size442783	Chr3	+	442783	4266	323618	23459830	5709483	20544024
scaffold502_size196668	Chr3	+	196668	160321	160362	23459830	14401827	14401868
scaffold143_size572353	Chr3	+	572353	453797	458452	23459830	4561113	14727474
scaffold56_size905644	Chr3	+	905644	318140	320859	23459830	14724592	14727302
scaffold303_size344171	Chr3	+	344171	3684	4865	23459830	14726627	14727781
scaffold4_size1665106	Chr3	+	1665106	735	2114	23459830	14756062	14757444
scaffold22_size1326342	Chr3	+	1326342	447233	448612	23459830	14756062	14757444
scaffold758_size75365	Chr3	+	75365	73264	74329	23459830	14864346	14865371
scaffold449_size226149	Chr3	+	226149	164548	165604	23459830	14864346	14865371
scaffold293_size352734	Chr3	+	352734	144187	320022	23459830	470707	17696460
scaffold707_size94148	Chr3	+	94148	14229	14314	23459830	15762816	15762901
scaffold640_size121989	Chr3	+	121989	49120	49943	23459830	16597100	16597954
scaffold801_size61522	Chr3	+	61522	32449	32534	23459830	16883536	16883621
scaffold853_size46902	Chr3	+	46902	4349	6855	23459830	16891644	16894231
scaffold498_size197487	Chr3	+	197487	56817	58900	23459830	17293657	17295742
scaffold317_size334483	Chr3	+	334483	195838	196686	23459830	17513931	17514779
scaffold1046_size21631	Chr3	-	21631	8427	9275	23459830	17513931	17514779
scaffold160_size534036	Chr3	+	534036	138468	304464	23459830	2232467	19821048
scaffold876_size43045	Chr3	+	43045	12888	13656	23459830	18419395	18420163
scaffold1462_size6324	Chr3	+	6324	4501	5269	23459830	18419395	18420163
scaffold85_size755756	Chr3	+	755756	722912	723532	23459830	18419830	18420458
scaffold268_size372821	Chr3	+	372821	8725	264256	23459830	6483961	18755574
scaffold1388_size7492	Chr3	+	7492	1222	5999	23459830	17128612	19917128
scaffold29_size1161289	Chr3	+	1161289	261419	965093	23459830	14864346	21432777
scaffold63_size858018	Chr3	+	858018	223362	225412	23459830	4211135	22560379
scaffold14_size1455245	Chr3	+	1455245	573208	1183635	23459830	16427046	19725948
scaffold247_size396517	Chr3	+	396517	56419	305590	23459830	19043452	21249134
scaffold136_size581398	Chr3	+	581398	253502	254603	23459830	19861985	19863143
scaffold395_size268688	Chr3	+	268688	48737	158854	23459830	9280392	20203580
scaffold310_size340163	Chr3	+	340163	164237	165431	23459830	20248832	20250014
scaffold100_size686073	Chr3	+	686073	406813	630484	23459830	2104964	20392091
scaffold90_size731574	Chr3	+	731574	368832	706403	23459830	4330771	22138918
scaffold408_size254463	Chr3	+	254463	34449	184676	23459830	18141207	23037407
scaffold553_size162348	Chr3	+	162348	36005	42622	23459830	19915940	20511109
scaffold384_size274972	Chr3	+	274972	60631	62335	23459830	20461974	20469502
scaffold387_size273758	Chr3	+	273758	140810	144408	23459830	20507569	20510882
scaffold1141_size15467	Chr3	+	15467	5113	5967	23459830	21020898	21021833
scaffold261_size381946	Chr3	+	381946	314750	316370	23459830	21204785	21206452
scaffold706_size94229	Chr3	+	94229	53190	53367	23459830	21346738	21397620
scaffold150_size559803	Chr3	+	559803	308035	513276	23459830	1601342	21433028
scaffold676_size108253	Chr3	+	108253	32393	32632	23459830	21934189	21934442
scaffold818_size56322	Chr3	+	56322	7781	8230	23459830	22787016	22787465
scaffold856_size46335	Chr3	+	46335	35641	35913	23459830	23037135	23037407
scaffold406_size255187	Chr4	+	255187	173895	175237	18585056	24529	25882
scaffold865_size45177	Chr4	+	45177	30638	30979	18585056	1177726	1178067
scaffold15_size1429888	Chr4	+	1429888	87929	89859	18585056	2455208	2457131
scaffold73_size822997	Chr4	+	822997	757713	759444	18585056	2539703	2541449
scaffold607_size133233	Chr4	+	133233	98997	99655	18585056	2588304	2718750
scaffold124_size609810	Chr4	+	609810	609648	609688	18585056	3222089	3222143
scaffold25_size1264610	Chr4	+	1264610	376485	378039	18585056	3579811	3581369
scaffold448_size226196	Chr4	+	226196	94967	95007	18585056	1442007	6944769
scaffold1119_size16554	Chr4	+	16554	3055	3095	18585056	1442007	6944769
scaffold66_size848830	Chr4	+	848830	272863	760093	18585056	1753153	5071379
scaffold755_size76505	Chr4	+	76505	28775	28861	18585056	6086687	6086773
scaffold407_size254605	Chr4	+	254605	89053	89302	18585056	6461324	6461573
scaffold1526_size5634	Chr4	+	5634	2829	3078	18585056	6461324	6461573
scaffold1537_size5455	Chr4	+	5455	2829	3078	18585056	6461324	6461573
scaffold1195_size13126	Chr4	+	13126	2471	2866	18585056	6950842	6951299
scaffold452_size225145	Chr4	+	225145	57443	138909	18585056	7305379	11183683
scaffold483_size203934	Chr4	+	203934	38167	38832	18585056	7618394	7618960
scaffold1503_size5883	Chr4	-	5883	4127	4791	18585056	7618394	7618960
scaffold286_size357339	Chr4	+	357339	108934	109409	18585056	7671404	7671879
scaffold685_size102961	Chr4	+	102961	47231	48174	18585056	8548967	9289765
scaffold64_size856543	Chr4	+	856543	134730	488275	18585056	5776174	18411333
scaffold739_size81091	Chr4	+	81091	4586	5358	18585056	9221648	9222417
scaffold845_size48912	Chr4	+	48912	43554	44326	18585056	9221648	9222417
scaffold682_size104136	Chr4	+	104136	14418	14699	18585056	9229629	9229910
scaffold1008_size24807	Chr4	+	24807	16080	16361	18585056	9229629	9229910
scaffold338_size319425	Chr4	+	319425	99520	99582	18585056	9779085	9779147
scaffold358_size295937	Chr4	+	295937	195547	196683	18585056	10314778	10316072
scaffold2_size1816428	Chr4	+	1816428	446714	1308824	18585056	7232800	12756205
scaffold373_size281293	Chr4	+	281293	109153	112993	18585056	11537362	11541130
scaffold313_size338943	Chr4	+	338943	19257	19533	18585056	12755925	12756205
scaffold670_size110176	Chr4	+	110176	56562	93632	18585056	2428697	13545326
scaffold108_size655003	Chr4	+	655003	361504	362426	18585056	12790542	12791490
scaffold311_size339713	Chr4	+	339713	77360	325470	18585056	211851	16803294
scaffold222_size435352	Chr4	+	435352	243753	243833	18585056	12686136	14267358
scaffold321_size333409	Chr4	+	333409	66526	260490	18585056	6021351	15930611
scaffold209_size449185	Chr4	+	449185	234766	235448	18585056	13587315	13587993
scaffold600_size134883	Chr4	+	134883	36933	37739	18585056	13587315	13588117
scaffold562_size155008	Chr4	+	155008	119477	121287	18585056	12686136	14267358
scaffold277_size366222	Chr4	+	366222	124464	130902	18585056	14173255	14179719
scaffold1083_size18907	Chr4	+	18907	12705	15756	18585056	14267278	14267358
scaffold764_size73013	Chr4	+	73013	54426	56392	18585056	14267287	14267358
scaffold415_size249257	Chr4	+	249257	219115	219249	18585056	14312985	14313119
scaffold182_size489013	Chr4	+	489013	481940	482066	18585056	14312993	14313119
scaffold690_size98446	Chr4	+	98446	23745	23871	18585056	14312993	14313119
scaffold279_size365527	Chr4	+	365527	168482	339450	18585056	13654325	15067859
scaffold172_size512938	Chr4	+	512938	130068	139556	18585056	14772314	14774607
scaffold515_size186375	Chr4	+	186375	42019	85585	18585056	14770815	17276769
scaffold307_size341957	Chr4	+	341957	62991	107041	18585056	1483018	15068121
scaffold273_size369092	Chr4	+	369092	330877	332767	18585056	15265122	15272238
scaffold292_size352950	Chr4	+	352950	60324	60374	18585056	15120654	15576704
scaffold573_size148756	Chr4	+	148756	25992	26273	18585056	15641868	15642164
scaffold404_size257756	Chr4	+	257756	135572	136570	18585056	15687350	15688406
scaffold1653_size2900	Chr4	+	2900	1492	1555	18585056	15769840	15769899
scaffold82_size768308	Chr4	+	768308	240717	697711	18585056	15256475	15930611
scaffold322_size332738	Chr4	+	332738	46089	49171	18585056	15927296	15930389
scaffold302_size345264	Chr4	+	345264	51935	333773	18585056	15927296	18305006
scaffold531_size179314	Chr4	+	179314	3937	4183	18585056	16013227	16013461
scaffold1038_size22408	Chr4	+	22408	9869	10115	18585056	16013227	16013461
scaffold181_size493926	Chr4	+	493926	485773	486340	18585056	16087251	16087814
scaffold145_size568489	Chr4	+	568489	462603	476522	18585056	16189936	16190249
scaffold252_size390766	Chr4	+	390766	382498	382544	18585056	16454721	16454767
scaffold669_size110238	Chr4	+	110238	55425	58147	18585056	16962144	16964733
scaffold597_size137995	Chr4	+	137995	13503	13893	18585056	17067431	17067818
scaffold757_size75512	Chr4	+	75512	11071	11461	18585056	17067431	17067818
scaffold992_size26005	Chr4	+	26005	11071	11461	18585056	17067431	17067818
scaffold712_size91892	Chr4	+	91892	28489	62512	18585056	8301746	17804974
scaffold165_size523336	Chr4	+	523336	494034	495490	18585056	17803599	17804974
scaffold218_size439493	Chr4	+	439493	397270	404564	18585056	17833158	17833674
scaffold324_size324465	Chr4	+	324465	241337	242313	18585056	18012986	18013997
scaffold146_size566370	Chr4	+	566370	344624	470382	18585056	13587315	18301430
scaffold198_size466070	Chr4	+	466070	318703	449992	18585056	16644283	18106968
scaffold1307_size9241	Chr4	-	9241	5668	9192	18585056	18103059	18106593
scaffold62_size859589	Chr4	+	859589	160480	160924	18585056	18304943	18305702
scaffold1216_size11741	Chr5	-	11741	74	4078	26975502	172677	173416
scaffold1076_size19232	Chr5	-	19232	16840	18940	26975502	550314	552404
scaffold529_size179514	Chr5	+	179514	59302	60579	26975502	550649	554744
scaffold347_size306357	Chr5	+	306357	91401	270427	26975502	550649	6401308
scaffold552_size162563	Chr5	+	162563	96256	96694	26975502	636014	636441
scaffold976_size27186	Chr5	+	27186	25047	25485	26975502	636014	636441
scaffold1125_size16441	Chr5	+	16441	1701	2139	26975502	636014	636441
scaffold615_size129786	Chr5	+	129786	36227	36287	26975502	930397	930457
scaffold191_size479834	Chr5	+	479834	451847	453128	26975502	935302	936649
scaffold870_size44295	Chr5	+	44295	40894	42175	26975502	935302	936649
scaffold1033_size23071	Chr5	+	23071	2120	3401	26975502	935302	936649
scaffold554_size161974	Chr5	+	161974	143485	145537	26975502	2127411	2129445
scaffold46_size1006163	Chr5	+	1006163	445582	697778	26975502	1847753	20675276
scaffold574_size148320	Chr5	+	148320	121690	122303	26975502	2456328	2456953
scaffold754_size76731	Chr5	+	76731	11215	11828	26975502	2456328	2456953
scaffold418_size248570	Chr5	+	248570	76068	117550	26975502	2841753	5962765
scaffold632_size124595	Chr5	+	124595	113418	113495	26975502	3188009	3188086
scaffold918_size34464	Chr5	-	34464	16271	18292	26975502	3212363	25972750
scaffold653_size116565	Chr5	+	116565	83397	84246	26975502	3291567	3292406
scaffold862_size45560	Chr5	+	45560	3203	3546	26975502	3554604	3568982
scaffold587_size140297	Chr5	+	140297	9134	10676	26975502	3755289	3756856
scaffold521_size184735	Chr5	+	184735	31190	31708	26975502	4103999	4104523
scaffold34_size1082081	Chr5	+	1082081	334518	335810	26975502	4111336	4112671
scaffold463_size217393	Chr5	+	217393	38420	39691	26975502	4111336	4112671
scaffold44_size1017685	Chr5	+	1017685	318175	323302	26975502	4112244	4117397
scaffold641_size121784	Chr5	-	121784	90614	101328	26975502	150351	15976362
scaffold86_size753315	Chr5	+	753315	55577	643868	26975502	2411154	21300956
scaffold193_size469430	Chr5	+	469430	14977	17847	26975502	4125431	4128201
scaffold267_size373412	Chr5	+	373412	148206	277259	26975502	4103999	5153768
scaffold369_size285830	Chr5	+	285830	183664	184162	26975502	4178725	4179246
scaffold81_size768935	Chr5	+	768935	34626	212429	26975502	3669000	22340575
scaffold393_size271938	Chr5	+	271938	10987	180016	26975502	4305503	19898819
scaffold535_size176836	Chr5	+	176836	110585	111823	26975502	4576592	4576860
scaffold1321_size8904	Chr5	+	8904	2653	5719	26975502	4576592	4576860
scaffold717_size90790	Chr5	-	90790	75797	79738	26975502	4776481	4780432
scaffold425_size243727	Chr5	+	243727	235177	235414	26975502	4935659	4935896
scaffold95_size706132	Chr5	+	706132	346268	360069	26975502	5015489	5104797
scaffold414_size249511	Chr5	+	249511	230015	243834	26975502	5015489	5104797
scaffold103_size665001	Chr5	+	665001	452399	519534	26975502	172648	7109225
scaffold239_size408147	Chr5	+	408147	300896	301040	26975502	5153624	5153768
scaffold650_size116903	Chr5	+	116903	2015	51032	26975502	508430	5245252
scaffold253_size390581	Chr5	+	390581	29101	271496	26975502	3286027	5926299
scaffold36_size1071405	Chr5	+	1071405	972514	974481	26975502	5736979	5739029
scaffold742_size80456	Chr5	+	80456	75039	76414	26975502	3617066	23954007
scaffold112_size645884	Chr5	+	645884	359693	360468	26975502	5925524	5926299
scaffold94_size713812	Chr5	+	713812	72179	587070	26975502	5562677	10863844
scaffold206_size458013	Chr5	+	458013	51886	52512	26975502	6176722	6177343
scaffold1013_size24420	Chr5	+	24420	22956	23582	26975502	6176722	6177343
scaffold320_size333601	Chr5	+	333601	318320	322903	26975502	6193600	6199666
scaffold376_size278392	Chr5	+	278392	13950	14737	26975502	6346727	6347469
scaffold537_size174685	Chr5	+	174685	8407	98147	26975502	1273286	24140013
scaffold315_size338688	Chr5	+	338688	232924	334784	26975502	6193600	15744682
scaffold412_size250143	Chr5	+	250143	121630	121854	26975502	6754037	6754307
scaffold744_size79833	Chr5	+	79833	42614	42953	26975502	6761019	6761487
scaffold841_size49873	Chr5	+	49873	15442	15874	26975502	6761019	6761533
scaffold1323_size8750	Chr5	+	8750	3373	3460	26975502	6761330	6761417
scaffold12_size1484567	Chr5	+	1484567	634751	1141189	26975502	6928766	25626690
scaffold53_size925423	Chr5	+	925423	44372	641245	26975502	3961447	17860338
scaffold55_size905835	Chr5	+	905835	848862	850955	26975502	7087115	7089284
scaffold18_size1404391	Chr5	+	1404391	34304	1030194	26975502	3413405	25279698
scaffold24_size1299124	Chr5	+	1299124	44369	1014617	26975502	1847753	26221707
scaffold133_size591675	Chr5	+	591675	35759	339461	26975502	7214741	20675276
scaffold178_size500592	Chr5	+	500592	6021	336069	26975502	3291567	26092318
scaffold31_size1122664	Chr5	+	1122664	162063	983557	26975502	1804615	26221707
scaffold221_size436046	Chr5	+	436046	52971	74711	26975502	3617066	23957495
scaffold61_size863762	Chr5	+	863762	1797	185675	26975502	1683276	15060168
scaffold596_size138122	Chr5	+	138122	54113	54187	26975502	2411154	21300956
scaffold340_size317973	Chr5	+	317973	75039	75107	26975502	7073532	18907587
scaffold447_size226588	Chr5	+	226588	21250	77409	26975502	7284622	20304571
scaffold139_size577731	Chr5	+	577731	140107	140166	26975502	970811	25925133
scaffold110_size649966	Chr5	+	649966	332644	430337	26975502	3578300	25626690
scaffold677_size107734	Chr5	+	107734	27873	29899	26975502	10540838	10542920
scaffold334_size320946	Chr5	+	320946	160355	162422	26975502	10540838	10542961
scaffold381_size276415	Chr5	+	276415	44433	44500	26975502	5161511	16239709
scaffold386_size274479	Chr5	+	274479	51150	113608	26975502	772034	12865248
scaffold106_size656854	Chr5	+	656854	165170	635841	26975502	794566	25828892
scaffold318_size334380	Chr5	+	334380	69172	70669	26975502	11198483	11200017
scaffold1118_size16570	Chr5	+	16570	13393	13452	26975502	970811	25925133
scaffold13_size1475766	Chr5	+	1475766	976646	1468633	26975502	2025489	12773225
scaffold188_size480585	Chr5	+	480585	25749	227905	26975502	6682860	15347627
scaffold3_size1784162	Chr5	+	1784162	316240	1657714	26975502	508428	12118325
scaffold184_size485503	Chr5	+	485503	241017	360151	26975502	130541	12773225
scaffold352_size303969	Chr5	+	303969	196129	302771	26975502	6401242	12773061
scaffold51_size953629	Chr5	+	953629	228825	231215	26975502	12770835	12773225
scaffold20_size1366081	Chr5	+	1366081	1144996	1147382	26975502	12770835	12773225
scaffold135_size590554	Chr5	+	590554	121112	123515	26975502	12770835	12773225
scaffold171_size516701	Chr5	+	516701	180919	183322	26975502	12770835	12773225
scaffold301_size346720	Chr5	+	346720	176490	178892	26975502	12770835	12773225
scaffold359_size295461	Chr5	+	295461	117520	119923	26975502	12770835	12773225
scaffold421_size247372	Chr5	+	247372	124668	127072	26975502	12770835	12773225
scaffold442_size230434	Chr5	+	230434	137758	140162	26975502	12770835	12773225
scaffold294_size351170	Chr5	+	351170	313326	315710	26975502	12770835	12773225
scaffold800_size61662	Chr5	+	61662	46323	48728	26975502	12770835	12773225
scaffold68_size843662	Chr5	+	843662	304128	305147	26975502	12772225	12773225
scaffold127_size606493	Chr5	+	606493	513513	513591	26975502	8972535	19885742
scaffold54_size918619	Chr5	+	918619	299948	889279	26975502	12770835	20842309
scaffold388_size273501	Chr5	+	273501	187353	256149	26975502	2411154	22785315
scaffold84_size759781	Chr5	+	759781	152563	505075	26975502	129806	23078690
scaffold494_size199745	Chr5	+	199745	13575	14228	26975502	13090097	13090753
scaffold10_size1516488	Chr5	+	1516488	122389	1031851	26975502	5358924	20756401
scaffold93_size714796	Chr5	+	714796	90257	603975	26975502	2057503	24403600
scaffold550_size162924	Chr5	+	162924	37961	106415	26975502	4125431	18091954
scaffold569_size149915	Chr5	+	149915	72794	118593	26975502	9836981	20940074
scaffold391_size273082	Chr5	+	273082	11414	108999	26975502	550861	22683686
scaffold631_size125893	Chr5	+	125893	66244	66316	26975502	1804615	23054844
scaffold111_size649699	Chr5	+	649699	178096	536152	26975502	3073861	25885401
scaffold392_size272084	Chr5	+	272084	199142	200908	26975502	13874002	13875668
scaffold542_size172077	Chr5	+	172077	91224	99283	26975502	13874002	22383965
scaffold711_size92162	Chr5	+	92162	64068	64139	26975502	2587828	24530245
scaffold17_size1411551	Chr5	+	1411551	457357	1177354	26975502	12770835	20717861
scaffold226_size429880	Chr5	+	429880	269332	269389	26975502	5161511	23844262
scaffold893_size39817	Chr5	+	39817	33776	34534	26975502	14630287	14631132
scaffold437_size236406	Chr5	+	236406	9776	13778	26975502	3961447	25185177
scaffold1088_size18135	Chr5	+	18135	15320	15392	26975502	4929559	23054844
scaffold333_size321185	Chr5	+	321185	69261	113040	26975502	1853299	26195528
scaffold684_size103286	Chr5	+	103286	41714	41801	26975502	8906422	21300956
scaffold357_size296716	Chr5	+	296716	156520	156590	26975502	559333	25875467
scaffold1238_size10990	Chr5	+	10990	8238	8308	26975502	559333	25875467
scaffold115_size639320	Chr5	+	639320	15166	618271	26975502	10542234	24531730
scaffold162_size531800	Chr5	+	531800	87848	89155	26975502	15743269	15744576
scaffold35_size1080921	Chr5	+	1080921	35658	1012829	26975502	1099987	25279664
scaffold233_size415906	Chr5	+	415906	197737	199768	26975502	15816838	15818839
scaffold363_size289583	Chr5	+	289583	240555	261415	26975502	8906422	21300956
scaffold785_size65379	Chr5	+	65379	18532	19399	26975502	16408213	16409081
scaffold826_size54165	Chr5	+	54165	28456	28740	26975502	16718712	16718996
scaffold362_size289980	Chr5	+	289980	89614	224538	26975502	16566580	26682781
scaffold509_size189280	Chr5	+	189280	16891	19572	26975502	16839237	16841991
scaffold41_size1047198	Chr5	+	1047198	747549	747664	26975502	2975009	23431493
scaffold355_size298094	Chr5	+	298094	136418	136533	26975502	2975009	23431493
scaffold245_size399718	Chr5	+	399718	394657	394828	26975502	17589902	17590088
scaffold89_size737138	Chr5	+	737138	207399	208684	26975502	17663537	17664926
scaffold163_size528813	Chr5	+	528813	145549	493307	26975502	9815419	25784183
scaffold69_size841560	Chr5	+	841560	212138	424522	26975502	970811	24454127
scaffold255_size387927	Chr5	+	387927	364367	368436	26975502	18087914	18091954
scaffold249_size395244	Chr5	+	395244	138551	138810	26975502	18775060	18775360
scaffold260_size384151	Chr5	+	384151	213230	213932	26975502	18922127	18922837
scaffold33_size1110170	Chr5	+	1110170	813259	1086179	26975502	4673899	20304571
scaffold747_size78364	Chr5	+	78364	53435	54552	26975502	20482378	20483754
scaffold297_size348767	Chr5	+	348767	75863	247889	26975502	10540838	26221707
scaffold579_size144847	Chr5	+	144847	59548	73256	26975502	3212356	25972737
scaffold123_size610937	Chr5	+	610937	393388	394637	26975502	2779135	25491989
scaffold234_size415727	Chr5	+	415727	413177	414426	26975502	2779135	25491989
scaffold753_size76750	Chr5	+	76750	31075	32324	26975502	2779135	25491989
scaffold332_size321420	Chr5	+	321420	12771	129319	26975502	12772225	22689356
scaffold187_size480904	Chr5	+	480904	94327	166933	26975502	21761195	26221707
scaffold349_size305835	Chr5	+	305835	284704	284753	26975502	16667451	26921727
scaffold380_size276706	Chr5	+	276706	118031	118182	26975502	22383804	22383965
scaffold169_size519396	Chr5	+	519396	76519	76698	26975502	22555239	22555418
scaffold567_size152524	Chr5	+	152524	33333	140672	26975502	930397	22785315
scaffold571_size149637	Chr5	+	149637	1035	10918	26975502	3212356	22689356
scaffold323_size325199	Chr5	+	325199	197474	199732	26975502	22677805	22689356
scaffold887_size41067	Chr5	+	41067	16763	18985	26975502	22681486	22683686
scaffold216_size441981	Chr5	+	441981	57921	59714	26975502	22681515	22688772
scaffold1010_size24771	Chr5	-	24771	9755	10821	26975502	22682184	22688772
scaffold1152_size15161	Chr5	-	15161	6703	7790	26975502	23077616	23078690
scaffold480_size206361	Chr5	+	206361	23844	27143	26975502	23231505	25160474
scaffold76_size807220	Chr5	+	807220	724622	726740	26975502	23385090	23387255
scaffold166_size521459	Chr5	+	521459	479064	481182	26975502	23385090	23387255
scaffold134_size590630	Chr5	+	590630	548766	569752	26975502	22077847	23957495
scaffold151_size559051	Chr5	+	559051	65052	65587	26975502	23880486	23881034
scaffold1054_size21101	Chr5	+	21101	19436	19971	26975502	23880486	23881034
scaffold462_size217632	Chr5	+	217632	23299	24180	26975502	24225277	24226177
scaffold482_size205035	Chr5	+	205035	102734	103553	26975502	24289225	24290044
scaffold122_size611765	Chr5	+	611765	336673	338623	26975502	24289292	24290343
scaffold789_size64529	Chr5	+	64529	27487	27721	26975502	24309507	24309765
scaffold477_size208692	Chr5	+	208692	49078	49721	26975502	24828298	24828941
scaffold300_size346845	Chr5	+	346845	139989	141583	26975502	25708410	25710004
scaffold217_size439810	Chr5	+	439810	84212	390778	26975502	8972531	25754935
scaffold248_size396238	Chr5	+	396238	137627	308109	26975502	559333	25884618
scaffold745_size79788	Chr5	+	79788	7268	63002	26975502	7387889	26467136
scaffold774_size69362	Chr5	+	69362	48633	49558	26975502	26451353	26452369
scaffold59_size887255	Chr5	+	887255	757081	757451	26975502	26476858	26477228
scaffold104_size664890	Chr5	+	664890	373579	552415	26975502	614651	26725276
scaffold451_size225693	Chr5	+	225693	60053	76384	26975502	26723248	26735441
scaffold962_size28542	ChrM	+	28542	26194	26261	366924	21819	21886
scaffold514_size186587	ChrM	+	186587	146035	146237	366924	29936	30154
scaffold1217_size11707	ChrM	+	11707	5177	5274	366924	30745	30842
scaffold1607_size4169	ChrM	-	4169	3993	4169	366924	75584	75768
scaffold70_size835982	ChrM	+	835982	765725	780331	366924	112954	169020
scaffold657_size115252	ChrM	+	115252	70988	71368	366924	188076	188434
scaffold374_size280266	ChrM	+	280266	123996	124046	366924	303123	303173
scaffold1729_size1695	ChrM	+	1695	173	499	366924	315999	316340
scaffold419_size248360	ChrM	+	248360	22941	23790	366924	330013	332440
scaffold855_size46386	ChrM	+	46386	8713	9007	366924	351047	351341
scaffold543_size170649	ChrC	+	170649	121622	121694	154478	1187	1259
scaffold639_size122514	ChrC	+	122514	60548	60592	154478	11985	12029
scaffold719_size90700	ChrC	+	90700	534	578	154478	11985	12029
scaffold772_size70005	ChrC	+	70005	11848	12089	154478	16445	20856
scaffold262_size380975	ChrC	+	380975	93523	93985	154478	19585	20045
scaffold83_size766868	ChrC	-	766868	105869	474477	154478	4196	147757
scaffold45_size1012159	ChrC	-	1012159	534006	883757	154478	30313	98396
scaffold132_size599623	ChrC	+	599623	140750	564794	154478	59855	61996
scaffold37_size1057303	ChrC	+	1057303	281966	360016	154478	12	154254
scaffold179_size500287	ChrC	+	500287	88413	88613	154478	75799	75999
scaffold92_size718879	ChrC	+	718879	580525	580642	154478	86454	86583
scaffold57_size904867	ChrC	+	904867	105458	596455	154478	14043	149630
scaffold210_size448060	ChrC	+	448060	36438	61842	154478	72766	137483
scaffold101_size679088	ChrC	+	679088	16866	517926	154478	103660	134988
scaffold74_size818217	ChrC	+	818217	418959	419017	154478	103660	134988
scaffold153_size555728	ChrC	+	555728	179416	179898	154478	98370	140278
scaffold154_size551747	ChrC	+	551747	370620	370714	154478	103483	135165
scaffold240_size406237	ChrC	+	406237	160741	160864	154478	95284	143364
scaffold289_size354729	ChrC	+	354729	266035	266473	154478	101564	137084
scaffold471_size212349	ChrC	+	212349	104921	104974	154478	107988	130660
scaffold608_size133036	ChrC	+	133036	67646	67700	154478	91662	146986
scaffold1487_size6036	ChrC	-	6036	157	5736	154478	101219	137429
scaffold1709_size1949	ChrC	-	1949	179	1691	154478	101042	137606
scaffold158_size541355	ChrC	+	541355	189828	190294	154478	97011	141637
scaffold52_size936991	None	+	936991	na	na	na	na	na
scaffold58_size900371	None	+	900371	na	na	na	na	na
scaffold75_size815677	None	+	815677	na	na	na	na	na
scaffold78_size780330	None	+	780330	na	na	na	na	na
scaffold109_size652032	None	+	652032	na	na	na	na	na
scaffold119_size622808	None	+	622808	na	na	na	na	na
scaffold121_size616638	None	+	616638	na	na	na	na	na
scaffold129_size605804	None	+	605804	na	na	na	na	na
scaffold131_size602077	None	+	602077	na	na	na	na	na
scaffold138_size578810	None	+	578810	na	na	na	na	na
scaffold140_size577704	None	+	577704	na	na	na	na	na
scaffold141_size577029	None	+	577029	na	na	na	na	na
scaffold149_size559883	None	+	559883	na	na	na	na	na
scaffold186_size484970	None	+	484970	na	na	na	na	na
scaffold194_size468989	None	+	468989	na	na	na	na	na
scaffold195_size468173	None	+	468173	na	na	na	na	na
scaffold199_size465929	None	+	465929	na	na	na	na	na
scaffold200_size464826	None	+	464826	na	na	na	na	na
scaffold204_size461939	None	+	461939	na	na	na	na	na
scaffold207_size453297	None	+	453297	na	na	na	na	na
scaffold212_size444446	None	+	444446	na	na	na	na	na
scaffold213_size443723	None	+	443723	na	na	na	na	na
scaffold214_size443516	None	+	443516	na	na	na	na	na
scaffold219_size438390	None	+	438390	na	na	na	na	na
scaffold223_size435064	None	+	435064	na	na	na	na	na
scaffold224_size434566	None	+	434566	na	na	na	na	na
scaffold227_size428916	None	+	428916	na	na	na	na	na
scaffold231_size422325	None	+	422325	na	na	na	na	na
scaffold232_size418928	None	+	418928	na	na	na	na	na
scaffold236_size412999	None	+	412999	na	na	na	na	na
scaffold238_size410540	None	+	410540	na	na	na	na	na
scaffold241_size405056	None	+	405056	na	na	na	na	na
scaffold242_size401956	None	+	401956	na	na	na	na	na
scaffold257_size385841	None	+	385841	na	na	na	na	na
scaffold263_size379573	None	+	379573	na	na	na	na	na
scaffold270_size371520	None	+	371520	na	na	na	na	na
scaffold276_size366521	None	+	366521	na	na	na	na	na
scaffold278_size365576	None	+	365576	na	na	na	na	na
scaffold280_size365250	None	+	365250	na	na	na	na	na
scaffold284_size359695	None	+	359695	na	na	na	na	na
scaffold287_size357018	None	+	357018	na	na	na	na	na
scaffold290_size354082	None	+	354082	na	na	na	na	na
scaffold295_size350362	None	+	350362	na	na	na	na	na
scaffold299_size348511	None	+	348511	na	na	na	na	na
scaffold306_size343137	None	+	343137	na	na	na	na	na
scaffold312_size339379	None	+	339379	na	na	na	na	na
scaffold319_size334000	None	+	334000	na	na	na	na	na
scaffold326_size324086	None	+	324086	na	na	na	na	na
scaffold329_size323464	None	+	323464	na	na	na	na	na
scaffold343_size316294	None	+	316294	na	na	na	na	na
scaffold345_size313805	None	+	313805	na	na	na	na	na
scaffold346_size309305	None	+	309305	na	na	na	na	na
scaffold353_size303223	None	+	303223	na	na	na	na	na
scaffold356_size297566	None	+	297566	na	na	na	na	na
scaffold361_size292200	None	+	292200	na	na	na	na	na
scaffold364_size288414	None	+	288414	na	na	na	na	na
scaffold365_size288368	None	+	288368	na	na	na	na	na
scaffold367_size287238	None	+	287238	na	na	na	na	na
scaffold370_size285785	None	+	285785	na	na	na	na	na
scaffold371_size285767	None	+	285767	na	na	na	na	na
scaffold382_size276227	None	+	276227	na	na	na	na	na
scaffold383_size275080	None	+	275080	na	na	na	na	na
scaffold385_size274724	None	+	274724	na	na	na	na	na
scaffold394_size268910	None	+	268910	na	na	na	na	na
scaffold398_size264306	None	+	264306	na	na	na	na	na
scaffold399_size263046	None	+	263046	na	na	na	na	na
scaffold402_size261414	None	+	261414	na	na	na	na	na
scaffold403_size258745	None	+	258745	na	na	na	na	na
scaffold405_size257100	None	+	257100	na	na	na	na	na
scaffold409_size254044	None	+	254044	na	na	na	na	na
scaffold410_size252252	None	+	252252	na	na	na	na	na
scaffold411_size250506	None	+	250506	na	na	na	na	na
scaffold413_size249949	None	+	249949	na	na	na	na	na
scaffold417_size248619	None	+	248619	na	na	na	na	na
scaffold422_size246560	None	+	246560	na	na	na	na	na
scaffold423_size245578	None	+	245578	na	na	na	na	na
scaffold424_size243908	None	+	243908	na	na	na	na	na
scaffold427_size242665	None	+	242665	na	na	na	na	na
scaffold429_size240638	None	+	240638	na	na	na	na	na
scaffold431_size238522	None	+	238522	na	na	na	na	na
scaffold433_size237148	None	+	237148	na	na	na	na	na
scaffold434_size237078	None	+	237078	na	na	na	na	na
scaffold438_size236227	None	+	236227	na	na	na	na	na
scaffold440_size235831	None	+	235831	na	na	na	na	na
scaffold444_size228446	None	+	228446	na	na	na	na	na
scaffold446_size227560	None	+	227560	na	na	na	na	na
scaffold450_size225824	None	+	225824	na	na	na	na	na
scaffold453_size224172	None	+	224172	na	na	na	na	na
scaffold455_size221765	None	+	221765	na	na	na	na	na
scaffold464_size216925	None	+	216925	na	na	na	na	na
scaffold465_size216503	None	+	216503	na	na	na	na	na
scaffold466_size215351	None	+	215351	na	na	na	na	na
scaffold467_size213297	None	+	213297	na	na	na	na	na
scaffold468_size213067	None	+	213067	na	na	na	na	na
scaffold469_size213041	None	+	213041	na	na	na	na	na
scaffold472_size211008	None	+	211008	na	na	na	na	na
scaffold474_size210406	None	+	210406	na	na	na	na	na
scaffold481_size205178	None	+	205178	na	na	na	na	na
scaffold484_size203314	None	+	203314	na	na	na	na	na
scaffold485_size203089	None	+	203089	na	na	na	na	na
scaffold489_size201961	None	+	201961	na	na	na	na	na
scaffold490_size201484	None	+	201484	na	na	na	na	na
scaffold491_size201213	None	+	201213	na	na	na	na	na
scaffold492_size200913	None	+	200913	na	na	na	na	na
scaffold495_size198985	None	+	198985	na	na	na	na	na
scaffold496_size198102	None	+	198102	na	na	na	na	na
scaffold497_size197723	None	+	197723	na	na	na	na	na
scaffold499_size197483	None	+	197483	na	na	na	na	na
scaffold500_size197362	None	+	197362	na	na	na	na	na
scaffold503_size196565	None	+	196565	na	na	na	na	na
scaffold504_size193966	None	+	193966	na	na	na	na	na
scaffold506_size193237	None	+	193237	na	na	na	na	na
scaffold507_size192914	None	+	192914	na	na	na	na	na
scaffold508_size190849	None	+	190849	na	na	na	na	na
scaffold510_size188534	None	+	188534	na	na	na	na	na
scaffold512_size187211	None	+	187211	na	na	na	na	na
scaffold513_size186705	None	+	186705	na	na	na	na	na
scaffold517_size186048	None	+	186048	na	na	na	na	na
scaffold518_size185628	None	+	185628	na	na	na	na	na
scaffold525_size182403	None	+	182403	na	na	na	na	na
scaffold526_size182367	None	+	182367	na	na	na	na	na
scaffold527_size181175	None	+	181175	na	na	na	na	na
scaffold533_size178161	None	+	178161	na	na	na	na	na
scaffold534_size177025	None	+	177025	na	na	na	na	na
scaffold538_size173939	None	+	173939	na	na	na	na	na
scaffold539_size172833	None	+	172833	na	na	na	na	na
scaffold545_size168148	None	+	168148	na	na	na	na	na
scaffold546_size167141	None	+	167141	na	na	na	na	na
scaffold547_size167002	None	+	167002	na	na	na	na	na
scaffold549_size164026	None	+	164026	na	na	na	na	na
scaffold555_size160189	None	+	160189	na	na	na	na	na
scaffold557_size158656	None	+	158656	na	na	na	na	na
scaffold558_size158525	None	+	158525	na	na	na	na	na
scaffold560_size156814	None	+	156814	na	na	na	na	na
scaffold561_size156615	None	+	156615	na	na	na	na	na
scaffold563_size154924	None	+	154924	na	na	na	na	na
scaffold564_size154702	None	+	154702	na	na	na	na	na
scaffold565_size154525	None	+	154525	na	na	na	na	na
scaffold566_size152642	None	+	152642	na	na	na	na	na
scaffold568_size151327	None	+	151327	na	na	na	na	na
scaffold570_size149786	None	+	149786	na	na	na	na	na
scaffold575_size147595	None	+	147595	na	na	na	na	na
scaffold576_size146812	None	+	146812	na	na	na	na	na
scaffold578_size145013	None	+	145013	na	na	na	na	na
scaffold581_size142983	None	+	142983	na	na	na	na	na
scaffold582_size142586	None	+	142586	na	na	na	na	na
scaffold583_size141823	None	+	141823	na	na	na	na	na
scaffold584_size141760	None	+	141760	na	na	na	na	na
scaffold585_size141312	None	+	141312	na	na	na	na	na
scaffold586_size141285	None	+	141285	na	na	na	na	na
scaffold588_size139614	None	+	139614	na	na	na	na	na
scaffold589_size139569	None	+	139569	na	na	na	na	na
scaffold590_size139453	None	+	139453	na	na	na	na	na
scaffold591_size139029	None	+	139029	na	na	na	na	na
scaffold592_size138862	None	+	138862	na	na	na	na	na
scaffold593_size138782	None	+	138782	na	na	na	na	na
scaffold595_size138481	None	+	138481	na	na	na	na	na
scaffold599_size134888	None	+	134888	na	na	na	na	na
scaffold601_size134591	None	+	134591	na	na	na	na	na
scaffold602_size134299	None	+	134299	na	na	na	na	na
scaffold603_size133874	None	+	133874	na	na	na	na	na
scaffold605_size133348	None	+	133348	na	na	na	na	na
scaffold609_size132898	None	+	132898	na	na	na	na	na
scaffold610_size132475	None	+	132475	na	na	na	na	na
scaffold612_size132011	None	+	132011	na	na	na	na	na
scaffold616_size128914	None	+	128914	na	na	na	na	na
scaffold617_size128661	None	+	128661	na	na	na	na	na
scaffold618_size128606	None	+	128606	na	na	na	na	na
scaffold619_size128345	None	+	128345	na	na	na	na	na
scaffold620_size128314	None	+	128314	na	na	na	na	na
scaffold621_size128310	None	+	128310	na	na	na	na	na
scaffold626_size127221	None	+	127221	na	na	na	na	na
scaffold629_size126420	None	+	126420	na	na	na	na	na
scaffold630_size126236	None	+	126236	na	na	na	na	na
scaffold634_size124079	None	+	124079	na	na	na	na	na
scaffold636_size123790	None	+	123790	na	na	na	na	na
scaffold637_size123618	None	+	123618	na	na	na	na	na
scaffold638_size123451	None	+	123451	na	na	na	na	na
scaffold642_size121732	None	+	121732	na	na	na	na	na
scaffold643_size120596	None	+	120596	na	na	na	na	na
scaffold644_size119944	None	+	119944	na	na	na	na	na
scaffold645_size119521	None	+	119521	na	na	na	na	na
scaffold646_size119134	None	+	119134	na	na	na	na	na
scaffold648_size118734	None	+	118734	na	na	na	na	na
scaffold652_size116608	None	+	116608	na	na	na	na	na
scaffold654_size116285	None	+	116285	na	na	na	na	na
scaffold655_size115805	None	+	115805	na	na	na	na	na
scaffold656_size115366	None	+	115366	na	na	na	na	na
scaffold658_size114973	None	+	114973	na	na	na	na	na
scaffold660_size113795	None	+	113795	na	na	na	na	na
scaffold661_size113655	None	+	113655	na	na	na	na	na
scaffold662_size112683	None	+	112683	na	na	na	na	na
scaffold663_size112132	None	+	112132	na	na	na	na	na
scaffold664_size111833	None	+	111833	na	na	na	na	na
scaffold665_size111511	None	+	111511	na	na	na	na	na
scaffold666_size111503	None	+	111503	na	na	na	na	na
scaffold667_size110899	None	+	110899	na	na	na	na	na
scaffold668_size110816	None	+	110816	na	na	na	na	na
scaffold672_size109657	None	+	109657	na	na	na	na	na
scaffold673_size109591	None	+	109591	na	na	na	na	na
scaffold674_size109299	None	+	109299	na	na	na	na	na
scaffold679_size106169	None	+	106169	na	na	na	na	na
scaffold680_size105388	None	+	105388	na	na	na	na	na
scaffold681_size104346	None	+	104346	na	na	na	na	na
scaffold683_size103566	None	+	103566	na	na	na	na	na
scaffold686_size102709	None	+	102709	na	na	na	na	na
scaffold688_size100103	None	+	100103	na	na	na	na	na
scaffold691_size98172	None	+	98172	na	na	na	na	na
scaffold692_size98101	None	+	98101	na	na	na	na	na
scaffold693_size97963	None	+	97963	na	na	na	na	na
scaffold696_size97625	None	+	97625	na	na	na	na	na
scaffold697_size97550	None	+	97550	na	na	na	na	na
scaffold699_size96700	None	+	96700	na	na	na	na	na
scaffold700_size95485	None	+	95485	na	na	na	na	na
scaffold701_size95458	None	+	95458	na	na	na	na	na
scaffold702_size95231	None	+	95231	na	na	na	na	na
scaffold704_size94736	None	+	94736	na	na	na	na	na
scaffold705_size94633	None	+	94633	na	na	na	na	na
scaffold708_size93858	None	+	93858	na	na	na	na	na
scaffold709_size93466	None	+	93466	na	na	na	na	na
scaffold710_size92978	None	+	92978	na	na	na	na	na
scaffold714_size91440	None	+	91440	na	na	na	na	na
scaffold715_size91413	None	+	91413	na	na	na	na	na
scaffold716_size91399	None	+	91399	na	na	na	na	na
scaffold720_size90262	None	+	90262	na	na	na	na	na
scaffold721_size90222	None	+	90222	na	na	na	na	na
scaffold722_size90167	None	+	90167	na	na	na	na	na
scaffold723_size89902	None	+	89902	na	na	na	na	na
scaffold724_size89489	None	+	89489	na	na	na	na	na
scaffold726_size87774	None	+	87774	na	na	na	na	na
scaffold727_size87636	None	+	87636	na	na	na	na	na
scaffold730_size86902	None	+	86902	na	na	na	na	na
scaffold732_size84355	None	+	84355	na	na	na	na	na
scaffold733_size83835	None	+	83835	na	na	na	na	na
scaffold736_size81958	None	+	81958	na	na	na	na	na
scaffold737_size81492	None	+	81492	na	na	na	na	na
scaffold738_size81203	None	+	81203	na	na	na	na	na
scaffold740_size80664	None	+	80664	na	na	na	na	na
scaffold741_size80477	None	+	80477	na	na	na	na	na
scaffold743_size79864	None	+	79864	na	na	na	na	na
scaffold746_size79265	None	+	79265	na	na	na	na	na
scaffold748_size78166	None	+	78166	na	na	na	na	na
scaffold749_size78080	None	+	78080	na	na	na	na	na
scaffold750_size77980	None	+	77980	na	na	na	na	na
scaffold751_size77657	None	+	77657	na	na	na	na	na
scaffold752_size77146	None	+	77146	na	na	na	na	na
scaffold756_size75642	None	+	75642	na	na	na	na	na
scaffold759_size74576	None	+	74576	na	na	na	na	na
scaffold760_size73572	None	+	73572	na	na	na	na	na
scaffold762_size73340	None	+	73340	na	na	na	na	na
scaffold763_size73130	None	+	73130	na	na	na	na	na
scaffold765_size72457	None	+	72457	na	na	na	na	na
scaffold766_size71686	None	+	71686	na	na	na	na	na
scaffold767_size71480	None	+	71480	na	na	na	na	na
scaffold768_size71420	None	+	71420	na	na	na	na	na
scaffold769_size71344	None	+	71344	na	na	na	na	na
scaffold770_size71031	None	+	71031	na	na	na	na	na
scaffold771_size70994	None	+	70994	na	na	na	na	na
scaffold775_size68853	None	+	68853	na	na	na	na	na
scaffold776_size68812	None	+	68812	na	na	na	na	na
scaffold777_size68218	None	+	68218	na	na	na	na	na
scaffold779_size67710	None	+	67710	na	na	na	na	na
scaffold780_size67079	None	+	67079	na	na	na	na	na
scaffold781_size66705	None	+	66705	na	na	na	na	na
scaffold782_size66320	None	+	66320	na	na	na	na	na
scaffold783_size65617	None	+	65617	na	na	na	na	na
scaffold784_size65385	None	+	65385	na	na	na	na	na
scaffold787_size64947	None	+	64947	na	na	na	na	na
scaffold790_size64319	None	+	64319	na	na	na	na	na
scaffold791_size64248	None	+	64248	na	na	na	na	na
scaffold792_size63823	None	+	63823	na	na	na	na	na
scaffold793_size63454	None	+	63454	na	na	na	na	na
scaffold794_size63128	None	+	63128	na	na	na	na	na
scaffold795_size62889	None	+	62889	na	na	na	na	na
scaffold796_size62676	None	+	62676	na	na	na	na	na
scaffold798_size61987	None	+	61987	na	na	na	na	na
scaffold799_size61746	None	+	61746	na	na	na	na	na
scaffold802_size60760	None	+	60760	na	na	na	na	na
scaffold803_size60720	None	+	60720	na	na	na	na	na
scaffold804_size60364	None	+	60364	na	na	na	na	na
scaffold805_size60286	None	+	60286	na	na	na	na	na
scaffold806_size59925	None	+	59925	na	na	na	na	na
scaffold807_size59305	None	+	59305	na	na	na	na	na
scaffold808_size58761	None	+	58761	na	na	na	na	na
scaffold809_size58674	None	+	58674	na	na	na	na	na
scaffold810_size58437	None	+	58437	na	na	na	na	na
scaffold812_size57780	None	+	57780	na	na	na	na	na
scaffold813_size57398	None	+	57398	na	na	na	na	na
scaffold814_size57385	None	+	57385	na	na	na	na	na
scaffold815_size57204	None	+	57204	na	na	na	na	na
scaffold817_size56666	None	+	56666	na	na	na	na	na
scaffold820_size56079	None	+	56079	na	na	na	na	na
scaffold821_size55444	None	+	55444	na	na	na	na	na
scaffold822_size54770	None	+	54770	na	na	na	na	na
scaffold823_size54560	None	+	54560	na	na	na	na	na
scaffold824_size54541	None	+	54541	na	na	na	na	na
scaffold825_size54338	None	+	54338	na	na	na	na	na
scaffold827_size53893	None	+	53893	na	na	na	na	na
scaffold828_size53878	None	+	53878	na	na	na	na	na
scaffold829_size53678	None	+	53678	na	na	na	na	na
scaffold830_size53621	None	+	53621	na	na	na	na	na
scaffold831_size52652	None	+	52652	na	na	na	na	na
scaffold832_size52502	None	+	52502	na	na	na	na	na
scaffold833_size52258	None	+	52258	na	na	na	na	na
scaffold834_size52220	None	+	52220	na	na	na	na	na
scaffold835_size52192	None	+	52192	na	na	na	na	na
scaffold836_size51874	None	+	51874	na	na	na	na	na
scaffold837_size51679	None	+	51679	na	na	na	na	na
scaffold839_size50828	None	+	50828	na	na	na	na	na
scaffold840_size50587	None	+	50587	na	na	na	na	na
scaffold842_size49797	None	+	49797	na	na	na	na	na
scaffold843_size49361	None	+	49361	na	na	na	na	na
scaffold844_size49053	None	+	49053	na	na	na	na	na
scaffold846_size48087	None	+	48087	na	na	na	na	na
scaffold847_size47669	None	+	47669	na	na	na	na	na
scaffold848_size47649	None	+	47649	na	na	na	na	na
scaffold850_size47126	None	+	47126	na	na	na	na	na
scaffold851_size47108	None	+	47108	na	na	na	na	na
scaffold854_size46396	None	+	46396	na	na	na	na	na
scaffold857_size46234	None	+	46234	na	na	na	na	na
scaffold859_size45766	None	+	45766	na	na	na	na	na
scaffold860_size45686	None	+	45686	na	na	na	na	na
scaffold861_size45613	None	+	45613	na	na	na	na	na
scaffold863_size45424	None	+	45424	na	na	na	na	na
scaffold864_size45220	None	+	45220	na	na	na	na	na
scaffold866_size44941	None	+	44941	na	na	na	na	na
scaffold867_size44793	None	+	44793	na	na	na	na	na
scaffold868_size44554	None	+	44554	na	na	na	na	na
scaffold871_size43955	None	+	43955	na	na	na	na	na
scaffold872_size43666	None	+	43666	na	na	na	na	na
scaffold873_size43579	None	+	43579	na	na	na	na	na
scaffold874_size43416	None	+	43416	na	na	na	na	na
scaffold875_size43210	None	+	43210	na	na	na	na	na
scaffold877_size42937	None	+	42937	na	na	na	na	na
scaffold878_size42927	None	+	42927	na	na	na	na	na
scaffold880_size42587	None	+	42587	na	na	na	na	na
scaffold881_size42520	None	+	42520	na	na	na	na	na
scaffold882_size42275	None	+	42275	na	na	na	na	na
scaffold883_size41640	None	+	41640	na	na	na	na	na
scaffold884_size41633	None	+	41633	na	na	na	na	na
scaffold886_size41218	None	+	41218	na	na	na	na	na
scaffold889_size40203	None	+	40203	na	na	na	na	na
scaffold891_size40067	None	+	40067	na	na	na	na	na
scaffold892_size39960	None	+	39960	na	na	na	na	na
scaffold894_size39349	None	+	39349	na	na	na	na	na
scaffold895_size39214	None	+	39214	na	na	na	na	na
scaffold896_size38970	None	+	38970	na	na	na	na	na
scaffold897_size38969	None	+	38969	na	na	na	na	na
scaffold898_size38958	None	+	38958	na	na	na	na	na
scaffold899_size37830	None	+	37830	na	na	na	na	na
scaffold900_size37806	None	+	37806	na	na	na	na	na
scaffold901_size37753	None	+	37753	na	na	na	na	na
scaffold902_size37658	None	+	37658	na	na	na	na	na
scaffold903_size37564	None	+	37564	na	na	na	na	na
scaffold904_size37068	None	+	37068	na	na	na	na	na
scaffold905_size37019	None	+	37019	na	na	na	na	na
scaffold906_size36960	None	+	36960	na	na	na	na	na
scaffold907_size36840	None	+	36840	na	na	na	na	na
scaffold908_size36787	None	+	36787	na	na	na	na	na
scaffold910_size36566	None	+	36566	na	na	na	na	na
scaffold911_size36418	None	+	36418	na	na	na	na	na
scaffold912_size36338	None	+	36338	na	na	na	na	na
scaffold913_size36170	None	+	36170	na	na	na	na	na
scaffold914_size35904	None	+	35904	na	na	na	na	na
scaffold915_size35427	None	+	35427	na	na	na	na	na
scaffold916_size35026	None	+	35026	na	na	na	na	na
scaffold917_size34847	None	+	34847	na	na	na	na	na
scaffold920_size34415	None	+	34415	na	na	na	na	na
scaffold921_size34329	None	+	34329	na	na	na	na	na
scaffold922_size34272	None	+	34272	na	na	na	na	na
scaffold924_size33884	None	+	33884	na	na	na	na	na
scaffold925_size33834	None	+	33834	na	na	na	na	na
scaffold926_size33732	None	+	33732	na	na	na	na	na
scaffold927_size33562	None	+	33562	na	na	na	na	na
scaffold928_size33278	None	+	33278	na	na	na	na	na
scaffold929_size32888	None	+	32888	na	na	na	na	na
scaffold931_size32507	None	+	32507	na	na	na	na	na
scaffold932_size32227	None	+	32227	na	na	na	na	na
scaffold933_size32127	None	+	32127	na	na	na	na	na
scaffold934_size31994	None	+	31994	na	na	na	na	na
scaffold935_size31967	None	+	31967	na	na	na	na	na
scaffold936_size31872	None	+	31872	na	na	na	na	na
scaffold937_size31582	None	+	31582	na	na	na	na	na
scaffold938_size31207	None	+	31207	na	na	na	na	na
scaffold939_size31099	None	+	31099	na	na	na	na	na
scaffold941_size30928	None	+	30928	na	na	na	na	na
scaffold942_size30811	None	+	30811	na	na	na	na	na
scaffold943_size30680	None	+	30680	na	na	na	na	na
scaffold944_size30549	None	+	30549	na	na	na	na	na
scaffold945_size30406	None	+	30406	na	na	na	na	na
scaffold946_size30262	None	+	30262	na	na	na	na	na
scaffold947_size30245	None	+	30245	na	na	na	na	na
scaffold948_size30146	None	+	30146	na	na	na	na	na
scaffold950_size30049	None	+	30049	na	na	na	na	na
scaffold952_size29999	None	+	29999	na	na	na	na	na
scaffold953_size29972	None	+	29972	na	na	na	na	na
scaffold954_size29639	None	+	29639	na	na	na	na	na
scaffold955_size29548	None	+	29548	na	na	na	na	na
scaffold956_size29173	None	+	29173	na	na	na	na	na
scaffold957_size29101	None	+	29101	na	na	na	na	na
scaffold959_size28777	None	+	28777	na	na	na	na	na
scaffold960_size28733	None	+	28733	na	na	na	na	na
scaffold961_size28710	None	+	28710	na	na	na	na	na
scaffold963_size28341	None	+	28341	na	na	na	na	na
scaffold964_size28131	None	+	28131	na	na	na	na	na
scaffold965_size28123	None	+	28123	na	na	na	na	na
scaffold966_size28107	None	+	28107	na	na	na	na	na
scaffold967_size28068	None	+	28068	na	na	na	na	na
scaffold968_size27992	None	+	27992	na	na	na	na	na
scaffold969_size27970	None	+	27970	na	na	na	na	na
scaffold971_size27813	None	+	27813	na	na	na	na	na
scaffold972_size27793	None	+	27793	na	na	na	na	na
scaffold973_size27450	None	+	27450	na	na	na	na	na
scaffold974_size27438	None	+	27438	na	na	na	na	na
scaffold975_size27401	None	+	27401	na	na	na	na	na
scaffold977_size27050	None	+	27050	na	na	na	na	na
scaffold979_size26792	None	+	26792	na	na	na	na	na
scaffold980_size26778	None	+	26778	na	na	na	na	na
scaffold981_size26757	None	+	26757	na	na	na	na	na
scaffold982_size26748	None	+	26748	na	na	na	na	na
scaffold983_size26740	None	+	26740	na	na	na	na	na
scaffold984_size26647	None	+	26647	na	na	na	na	na
scaffold985_size26605	None	+	26605	na	na	na	na	na
scaffold986_size26532	None	+	26532	na	na	na	na	na
scaffold987_size26497	None	+	26497	na	na	na	na	na
scaffold988_size26493	None	+	26493	na	na	na	na	na
scaffold989_size26411	None	+	26411	na	na	na	na	na
scaffold990_size26292	None	+	26292	na	na	na	na	na
scaffold993_size26001	None	+	26001	na	na	na	na	na
scaffold994_size25964	None	+	25964	na	na	na	na	na
scaffold995_size25810	None	+	25810	na	na	na	na	na
scaffold996_size25677	None	+	25677	na	na	na	na	na
scaffold997_size25677	None	+	25677	na	na	na	na	na
scaffold998_size25529	None	+	25529	na	na	na	na	na
scaffold1000_size25310	None	+	25310	na	na	na	na	na
scaffold1001_size25237	None	+	25237	na	na	na	na	na
scaffold1002_size25184	None	+	25184	na	na	na	na	na
scaffold1003_size25156	None	+	25156	na	na	na	na	na
scaffold1004_size25060	None	+	25060	na	na	na	na	na
scaffold1005_size24999	None	+	24999	na	na	na	na	na
scaffold1006_size24908	None	+	24908	na	na	na	na	na
scaffold1007_size24833	None	+	24833	na	na	na	na	na
scaffold1009_size24788	None	+	24788	na	na	na	na	na
scaffold1011_size24759	None	+	24759	na	na	na	na	na
scaffold1012_size24664	None	+	24664	na	na	na	na	na
scaffold1014_size24417	None	+	24417	na	na	na	na	na
scaffold1015_size24410	None	+	24410	na	na	na	na	na
scaffold1016_size24194	None	+	24194	na	na	na	na	na
scaffold1017_size24084	None	+	24084	na	na	na	na	na
scaffold1018_size24047	None	+	24047	na	na	na	na	na
scaffold1019_size23903	None	+	23903	na	na	na	na	na
scaffold1020_size23896	None	+	23896	na	na	na	na	na
scaffold1021_size23839	None	+	23839	na	na	na	na	na
scaffold1022_size23813	None	+	23813	na	na	na	na	na
scaffold1023_size23732	None	+	23732	na	na	na	na	na
scaffold1024_size23622	None	+	23622	na	na	na	na	na
scaffold1025_size23620	None	+	23620	na	na	na	na	na
scaffold1026_size23606	None	+	23606	na	na	na	na	na
scaffold1027_size23586	None	+	23586	na	na	na	na	na
scaffold1028_size23508	None	+	23508	na	na	na	na	na
scaffold1030_size23415	None	+	23415	na	na	na	na	na
scaffold1031_size23289	None	+	23289	na	na	na	na	na
scaffold1032_size23090	None	+	23090	na	na	na	na	na
scaffold1034_size22948	None	+	22948	na	na	na	na	na
scaffold1035_size22867	None	+	22867	na	na	na	na	na
scaffold1036_size22764	None	+	22764	na	na	na	na	na
scaffold1039_size21856	None	+	21856	na	na	na	na	na
scaffold1040_size21852	None	+	21852	na	na	na	na	na
scaffold1041_size21800	None	+	21800	na	na	na	na	na
scaffold1042_size21777	None	+	21777	na	na	na	na	na
scaffold1043_size21697	None	+	21697	na	na	na	na	na
scaffold1044_size21641	None	+	21641	na	na	na	na	na
scaffold1045_size21638	None	+	21638	na	na	na	na	na
scaffold1047_size21624	None	+	21624	na	na	na	na	na
scaffold1048_size21377	None	+	21377	na	na	na	na	na
scaffold1049_size21338	None	+	21338	na	na	na	na	na
scaffold1050_size21304	None	+	21304	na	na	na	na	na
scaffold1051_size21287	None	+	21287	na	na	na	na	na
scaffold1052_size21236	None	+	21236	na	na	na	na	na
scaffold1053_size21173	None	+	21173	na	na	na	na	na
scaffold1055_size21087	None	+	21087	na	na	na	na	na
scaffold1056_size21079	None	+	21079	na	na	na	na	na
scaffold1057_size21027	None	+	21027	na	na	na	na	na
scaffold1058_size21009	None	+	21009	na	na	na	na	na
scaffold1059_size20906	None	+	20906	na	na	na	na	na
scaffold1060_size20828	None	+	20828	na	na	na	na	na
scaffold1061_size20708	None	+	20708	na	na	na	na	na
scaffold1062_size20698	None	+	20698	na	na	na	na	na
scaffold1063_size20688	None	+	20688	na	na	na	na	na
scaffold1064_size20511	None	+	20511	na	na	na	na	na
scaffold1065_size20386	None	+	20386	na	na	na	na	na
scaffold1066_size20206	None	+	20206	na	na	na	na	na
scaffold1067_size19649	None	+	19649	na	na	na	na	na
scaffold1068_size19638	None	+	19638	na	na	na	na	na
scaffold1069_size19513	None	+	19513	na	na	na	na	na
scaffold1070_size19467	None	+	19467	na	na	na	na	na
scaffold1071_size19467	None	+	19467	na	na	na	na	na
scaffold1072_size19431	None	+	19431	na	na	na	na	na
scaffold1073_size19364	None	+	19364	na	na	na	na	na
scaffold1074_size19298	None	+	19298	na	na	na	na	na
scaffold1075_size19277	None	+	19277	na	na	na	na	na
scaffold1077_size19203	None	+	19203	na	na	na	na	na
scaffold1078_size19161	None	+	19161	na	na	na	na	na
scaffold1079_size19013	None	+	19013	na	na	na	na	na
scaffold1080_size18956	None	+	18956	na	na	na	na	na
scaffold1081_size18940	None	+	18940	na	na	na	na	na
scaffold1082_size18923	None	+	18923	na	na	na	na	na
scaffold1084_size18896	None	+	18896	na	na	na	na	na
scaffold1085_size18595	None	+	18595	na	na	na	na	na
scaffold1086_size18182	None	+	18182	na	na	na	na	na
scaffold1087_size18152	None	+	18152	na	na	na	na	na
scaffold1089_size18110	None	+	18110	na	na	na	na	na
scaffold1090_size17948	None	+	17948	na	na	na	na	na
scaffold1091_size17896	None	+	17896	na	na	na	na	na
scaffold1092_size17866	None	+	17866	na	na	na	na	na
scaffold1093_size17851	None	+	17851	na	na	na	na	na
scaffold1094_size17834	None	+	17834	na	na	na	na	na
scaffold1095_size17812	None	+	17812	na	na	na	na	na
scaffold1096_size17718	None	+	17718	na	na	na	na	na
scaffold1097_size17658	None	+	17658	na	na	na	na	na
scaffold1098_size17586	None	+	17586	na	na	na	na	na
scaffold1099_size17546	None	+	17546	na	na	na	na	na
scaffold1100_size17457	None	+	17457	na	na	na	na	na
scaffold1101_size17343	None	+	17343	na	na	na	na	na
scaffold1102_size17337	None	+	17337	na	na	na	na	na
scaffold1103_size17218	None	+	17218	na	na	na	na	na
scaffold1104_size17142	None	+	17142	na	na	na	na	na
scaffold1105_size17072	None	+	17072	na	na	na	na	na
scaffold1106_size16974	None	+	16974	na	na	na	na	na
scaffold1107_size16955	None	+	16955	na	na	na	na	na
scaffold1108_size16952	None	+	16952	na	na	na	na	na
scaffold1109_size16905	None	+	16905	na	na	na	na	na
scaffold1110_size16795	None	+	16795	na	na	na	na	na
scaffold1111_size16767	None	+	16767	na	na	na	na	na
scaffold1112_size16760	None	+	16760	na	na	na	na	na
scaffold1113_size16751	None	+	16751	na	na	na	na	na
scaffold1114_size16698	None	+	16698	na	na	na	na	na
scaffold1115_size16693	None	+	16693	na	na	na	na	na
scaffold1116_size16635	None	+	16635	na	na	na	na	na
scaffold1117_size16596	None	+	16596	na	na	na	na	na
scaffold1120_size16532	None	+	16532	na	na	na	na	na
scaffold1121_size16516	None	+	16516	na	na	na	na	na
scaffold1123_size16487	None	+	16487	na	na	na	na	na
scaffold1124_size16449	None	+	16449	na	na	na	na	na
scaffold1127_size16359	None	+	16359	na	na	na	na	na
scaffold1128_size16281	None	+	16281	na	na	na	na	na
scaffold1129_size16224	None	+	16224	na	na	na	na	na
scaffold1130_size16129	None	+	16129	na	na	na	na	na
scaffold1131_size16070	None	+	16070	na	na	na	na	na
scaffold1132_size15961	None	+	15961	na	na	na	na	na
scaffold1133_size15929	None	+	15929	na	na	na	na	na
scaffold1134_size15918	None	+	15918	na	na	na	na	na
scaffold1135_size15809	None	+	15809	na	na	na	na	na
scaffold1136_size15778	None	+	15778	na	na	na	na	na
scaffold1137_size15769	None	+	15769	na	na	na	na	na
scaffold1138_size15732	None	+	15732	na	na	na	na	na
scaffold1139_size15707	None	+	15707	na	na	na	na	na
scaffold1140_size15692	None	+	15692	na	na	na	na	na
scaffold1142_size15455	None	+	15455	na	na	na	na	na
scaffold1143_size15444	None	+	15444	na	na	na	na	na
scaffold1144_size15427	None	+	15427	na	na	na	na	na
scaffold1146_size15362	None	+	15362	na	na	na	na	na
scaffold1147_size15341	None	+	15341	na	na	na	na	na
scaffold1148_size15320	None	+	15320	na	na	na	na	na
scaffold1149_size15309	None	+	15309	na	na	na	na	na
scaffold1150_size15268	None	+	15268	na	na	na	na	na
scaffold1151_size15230	None	+	15230	na	na	na	na	na
scaffold1153_size15141	None	+	15141	na	na	na	na	na
scaffold1154_size15058	None	+	15058	na	na	na	na	na
scaffold1155_size15020	None	+	15020	na	na	na	na	na
scaffold1156_size14945	None	+	14945	na	na	na	na	na
scaffold1157_size14928	None	+	14928	na	na	na	na	na
scaffold1158_size14884	None	+	14884	na	na	na	na	na
scaffold1159_size14876	None	+	14876	na	na	na	na	na
scaffold1160_size14867	None	+	14867	na	na	na	na	na
scaffold1161_size14844	None	+	14844	na	na	na	na	na
scaffold1162_size14770	None	+	14770	na	na	na	na	na
scaffold1163_size14748	None	+	14748	na	na	na	na	na
scaffold1164_size14719	None	+	14719	na	na	na	na	na
scaffold1165_size14718	None	+	14718	na	na	na	na	na
scaffold1166_size14656	None	+	14656	na	na	na	na	na
scaffold1167_size14652	None	+	14652	na	na	na	na	na
scaffold1168_size14613	None	+	14613	na	na	na	na	na
scaffold1169_size14550	None	+	14550	na	na	na	na	na
scaffold1170_size14543	None	+	14543	na	na	na	na	na
scaffold1171_size14427	None	+	14427	na	na	na	na	na
scaffold1172_size14410	None	+	14410	na	na	na	na	na
scaffold1173_size14360	None	+	14360	na	na	na	na	na
scaffold1174_size14282	None	+	14282	na	na	na	na	na
scaffold1175_size14255	None	+	14255	na	na	na	na	na
scaffold1176_size14172	None	+	14172	na	na	na	na	na
scaffold1177_size14133	None	+	14133	na	na	na	na	na
scaffold1178_size13989	None	+	13989	na	na	na	na	na
scaffold1179_size13919	None	+	13919	na	na	na	na	na
scaffold1180_size13820	None	+	13820	na	na	na	na	na
scaffold1181_size13665	None	+	13665	na	na	na	na	na
scaffold1182_size13653	None	+	13653	na	na	na	na	na
scaffold1183_size13588	None	+	13588	na	na	na	na	na
scaffold1184_size13579	None	+	13579	na	na	na	na	na
scaffold1186_size13503	None	+	13503	na	na	na	na	na
scaffold1187_size13460	None	+	13460	na	na	na	na	na
scaffold1188_size13387	None	+	13387	na	na	na	na	na
scaffold1189_size13384	None	+	13384	na	na	na	na	na
scaffold1190_size13382	None	+	13382	na	na	na	na	na
scaffold1191_size13242	None	+	13242	na	na	na	na	na
scaffold1192_size13234	None	+	13234	na	na	na	na	na
scaffold1193_size13189	None	+	13189	na	na	na	na	na
scaffold1194_size13167	None	+	13167	na	na	na	na	na
scaffold1196_size13094	None	+	13094	na	na	na	na	na
scaffold1197_size12925	None	+	12925	na	na	na	na	na
scaffold1198_size12897	None	+	12897	na	na	na	na	na
scaffold1199_size12896	None	+	12896	na	na	na	na	na
scaffold1200_size12864	None	+	12864	na	na	na	na	na
scaffold1201_size12832	None	+	12832	na	na	na	na	na
scaffold1202_size12764	None	+	12764	na	na	na	na	na
scaffold1204_size12544	None	+	12544	na	na	na	na	na
scaffold1205_size12494	None	+	12494	na	na	na	na	na
scaffold1206_size12357	None	+	12357	na	na	na	na	na
scaffold1207_size12337	None	+	12337	na	na	na	na	na
scaffold1208_size12265	None	+	12265	na	na	na	na	na
scaffold1209_size12254	None	+	12254	na	na	na	na	na
scaffold1210_size12088	None	+	12088	na	na	na	na	na
scaffold1211_size12083	None	+	12083	na	na	na	na	na
scaffold1212_size12016	None	+	12016	na	na	na	na	na
scaffold1213_size11978	None	+	11978	na	na	na	na	na
scaffold1214_size11807	None	+	11807	na	na	na	na	na
scaffold1215_size11792	None	+	11792	na	na	na	na	na
scaffold1218_size11661	None	+	11661	na	na	na	na	na
scaffold1219_size11640	None	+	11640	na	na	na	na	na
scaffold1220_size11610	None	+	11610	na	na	na	na	na
scaffold1221_size11558	None	+	11558	na	na	na	na	na
scaffold1222_size11527	None	+	11527	na	na	na	na	na
scaffold1223_size11515	None	+	11515	na	na	na	na	na
scaffold1224_size11503	None	+	11503	na	na	na	na	na
scaffold1225_size11489	None	+	11489	na	na	na	na	na
scaffold1226_size11374	None	+	11374	na	na	na	na	na
scaffold1227_size11362	None	+	11362	na	na	na	na	na
scaffold1228_size11349	None	+	11349	na	na	na	na	na
scaffold1229_size11336	None	+	11336	na	na	na	na	na
scaffold1230_size11310	None	+	11310	na	na	na	na	na
scaffold1231_size11281	None	+	11281	na	na	na	na	na
scaffold1232_size11202	None	+	11202	na	na	na	na	na
scaffold1235_size11157	None	+	11157	na	na	na	na	na
scaffold1236_size11137	None	+	11137	na	na	na	na	na
scaffold1237_size10999	None	+	10999	na	na	na	na	na
scaffold1240_size10973	None	+	10973	na	na	na	na	na
scaffold1241_size10950	None	+	10950	na	na	na	na	na
scaffold1242_size10933	None	+	10933	na	na	na	na	na
scaffold1243_size10883	None	+	10883	na	na	na	na	na
scaffold1244_size10876	None	+	10876	na	na	na	na	na
scaffold1245_size10869	None	+	10869	na	na	na	na	na
scaffold1246_size10845	None	+	10845	na	na	na	na	na
scaffold1247_size10794	None	+	10794	na	na	na	na	na
scaffold1248_size10783	None	+	10783	na	na	na	na	na
scaffold1249_size10763	None	+	10763	na	na	na	na	na
scaffold1250_size10749	None	+	10749	na	na	na	na	na
scaffold1251_size10739	None	+	10739	na	na	na	na	na
scaffold1252_size10664	None	+	10664	na	na	na	na	na
scaffold1254_size10608	None	+	10608	na	na	na	na	na
scaffold1255_size10584	None	+	10584	na	na	na	na	na
scaffold1256_size10580	None	+	10580	na	na	na	na	na
scaffold1257_size10491	None	+	10491	na	na	na	na	na
scaffold1258_size10482	None	+	10482	na	na	na	na	na
scaffold1259_size10481	None	+	10481	na	na	na	na	na
scaffold1260_size10448	None	+	10448	na	na	na	na	na
scaffold1261_size10435	None	+	10435	na	na	na	na	na
scaffold1262_size10399	None	+	10399	na	na	na	na	na
scaffold1263_size10389	None	+	10389	na	na	na	na	na
scaffold1264_size10368	None	+	10368	na	na	na	na	na
scaffold1265_size10345	None	+	10345	na	na	na	na	na
scaffold1266_size10238	None	+	10238	na	na	na	na	na
scaffold1267_size10222	None	+	10222	na	na	na	na	na
scaffold1268_size10093	None	+	10093	na	na	na	na	na
scaffold1269_size10061	None	+	10061	na	na	na	na	na
scaffold1270_size10000	None	+	10000	na	na	na	na	na
scaffold1271_size9971	None	+	9971	na	na	na	na	na
scaffold1272_size9964	None	+	9964	na	na	na	na	na
scaffold1273_size9948	None	+	9948	na	na	na	na	na
scaffold1274_size9886	None	+	9886	na	na	na	na	na
scaffold1275_size9854	None	+	9854	na	na	na	na	na
scaffold1276_size9848	None	+	9848	na	na	na	na	na
scaffold1277_size9836	None	+	9836	na	na	na	na	na
scaffold1278_size9822	None	+	9822	na	na	na	na	na
scaffold1279_size9773	None	+	9773	na	na	na	na	na
scaffold1280_size9771	None	+	9771	na	na	na	na	na
scaffold1281_size9711	None	+	9711	na	na	na	na	na
scaffold1282_size9708	None	+	9708	na	na	na	na	na
scaffold1283_size9704	None	+	9704	na	na	na	na	na
scaffold1284_size9684	None	+	9684	na	na	na	na	na
scaffold1285_size9666	None	+	9666	na	na	na	na	na
scaffold1286_size9651	None	+	9651	na	na	na	na	na
scaffold1287_size9626	None	+	9626	na	na	na	na	na
scaffold1288_size9597	None	+	9597	na	na	na	na	na
scaffold1289_size9593	None	+	9593	na	na	na	na	na
scaffold1290_size9572	None	+	9572	na	na	na	na	na
scaffold1291_size9561	None	+	9561	na	na	na	na	na
scaffold1292_size9548	None	+	9548	na	na	na	na	na
scaffold1293_size9539	None	+	9539	na	na	na	na	na
scaffold1294_size9512	None	+	9512	na	na	na	na	na
scaffold1295_size9508	None	+	9508	na	na	na	na	na
scaffold1296_size9482	None	+	9482	na	na	na	na	na
scaffold1297_size9464	None	+	9464	na	na	na	na	na
scaffold1298_size9439	None	+	9439	na	na	na	na	na
scaffold1299_size9417	None	+	9417	na	na	na	na	na
scaffold1300_size9405	None	+	9405	na	na	na	na	na
scaffold1301_size9367	None	+	9367	na	na	na	na	na
scaffold1302_size9365	None	+	9365	na	na	na	na	na
scaffold1303_size9337	None	+	9337	na	na	na	na	na
scaffold1304_size9285	None	+	9285	na	na	na	na	na
scaffold1305_size9280	None	+	9280	na	na	na	na	na
scaffold1306_size9246	None	+	9246	na	na	na	na	na
scaffold1308_size9198	None	+	9198	na	na	na	na	na
scaffold1309_size9170	None	+	9170	na	na	na	na	na
scaffold1310_size9169	None	+	9169	na	na	na	na	na
scaffold1311_size9141	None	+	9141	na	na	na	na	na
scaffold1312_size9101	None	+	9101	na	na	na	na	na
scaffold1313_size9089	None	+	9089	na	na	na	na	na
scaffold1314_size9040	None	+	9040	na	na	na	na	na
scaffold1315_size9015	None	+	9015	na	na	na	na	na
scaffold1316_size8997	None	+	8997	na	na	na	na	na
scaffold1317_size8987	None	+	8987	na	na	na	na	na
scaffold1318_size8943	None	+	8943	na	na	na	na	na
scaffold1319_size8926	None	+	8926	na	na	na	na	na
scaffold1320_size8910	None	+	8910	na	na	na	na	na
scaffold1322_size8897	None	+	8897	na	na	na	na	na
scaffold1324_size8748	None	+	8748	na	na	na	na	na
scaffold1325_size8742	None	+	8742	na	na	na	na	na
scaffold1326_size8736	None	+	8736	na	na	na	na	na
scaffold1327_size8709	None	+	8709	na	na	na	na	na
scaffold1328_size8685	None	+	8685	na	na	na	na	na
scaffold1329_size8672	None	+	8672	na	na	na	na	na
scaffold1330_size8669	None	+	8669	na	na	na	na	na
scaffold1331_size8631	None	+	8631	na	na	na	na	na
scaffold1332_size8611	None	+	8611	na	na	na	na	na
scaffold1333_size8607	None	+	8607	na	na	na	na	na
scaffold1334_size8604	None	+	8604	na	na	na	na	na
scaffold1335_size8550	None	+	8550	na	na	na	na	na
scaffold1336_size8539	None	+	8539	na	na	na	na	na
scaffold1337_size8463	None	+	8463	na	na	na	na	na
scaffold1338_size8444	None	+	8444	na	na	na	na	na
scaffold1339_size8438	None	+	8438	na	na	na	na	na
scaffold1340_size8422	None	+	8422	na	na	na	na	na
scaffold1341_size8419	None	+	8419	na	na	na	na	na
scaffold1342_size8395	None	+	8395	na	na	na	na	na
scaffold1343_size8385	None	+	8385	na	na	na	na	na
scaffold1344_size8343	None	+	8343	na	na	na	na	na
scaffold1345_size8339	None	+	8339	na	na	na	na	na
scaffold1346_size8295	None	+	8295	na	na	na	na	na
scaffold1347_size8291	None	+	8291	na	na	na	na	na
scaffold1348_size8263	None	+	8263	na	na	na	na	na
scaffold1349_size8246	None	+	8246	na	na	na	na	na
scaffold1350_size8229	None	+	8229	na	na	na	na	na
scaffold1351_size8190	None	+	8190	na	na	na	na	na
scaffold1352_size8189	None	+	8189	na	na	na	na	na
scaffold1353_size8179	None	+	8179	na	na	na	na	na
scaffold1354_size8179	None	+	8179	na	na	na	na	na
scaffold1355_size8172	None	+	8172	na	na	na	na	na
scaffold1356_size8155	None	+	8155	na	na	na	na	na
scaffold1357_size8139	None	+	8139	na	na	na	na	na
scaffold1358_size8137	None	+	8137	na	na	na	na	na
scaffold1359_size8137	None	+	8137	na	na	na	na	na
scaffold1362_size8094	None	+	8094	na	na	na	na	na
scaffold1363_size8071	None	+	8071	na	na	na	na	na
scaffold1364_size8066	None	+	8066	na	na	na	na	na
scaffold1365_size8052	None	+	8052	na	na	na	na	na
scaffold1366_size8034	None	+	8034	na	na	na	na	na
scaffold1367_size7991	None	+	7991	na	na	na	na	na
scaffold1368_size7988	None	+	7988	na	na	na	na	na
scaffold1369_size7988	None	+	7988	na	na	na	na	na
scaffold1370_size7986	None	+	7986	na	na	na	na	na
scaffold1371_size7914	None	+	7914	na	na	na	na	na
scaffold1372_size7912	None	+	7912	na	na	na	na	na
scaffold1373_size7910	None	+	7910	na	na	na	na	na
scaffold1374_size7884	None	+	7884	na	na	na	na	na
scaffold1375_size7874	None	+	7874	na	na	na	na	na
scaffold1376_size7863	None	+	7863	na	na	na	na	na
scaffold1377_size7794	None	+	7794	na	na	na	na	na
scaffold1378_size7773	None	+	7773	na	na	na	na	na
scaffold1379_size7743	None	+	7743	na	na	na	na	na
scaffold1380_size7672	None	+	7672	na	na	na	na	na
scaffold1381_size7627	None	+	7627	na	na	na	na	na
scaffold1382_size7624	None	+	7624	na	na	na	na	na
scaffold1383_size7612	None	+	7612	na	na	na	na	na
scaffold1384_size7602	None	+	7602	na	na	na	na	na
scaffold1385_size7590	None	+	7590	na	na	na	na	na
scaffold1386_size7581	None	+	7581	na	na	na	na	na
scaffold1387_size7493	None	+	7493	na	na	na	na	na
scaffold1389_size7485	None	+	7485	na	na	na	na	na
scaffold1390_size7455	None	+	7455	na	na	na	na	na
scaffold1391_size7447	None	+	7447	na	na	na	na	na
scaffold1392_size7328	None	+	7328	na	na	na	na	na
scaffold1393_size7326	None	+	7326	na	na	na	na	na
scaffold1394_size7323	None	+	7323	na	na	na	na	na
scaffold1395_size7295	None	+	7295	na	na	na	na	na
scaffold1396_size7292	None	+	7292	na	na	na	na	na
scaffold1397_size7288	None	+	7288	na	na	na	na	na
scaffold1398_size7278	None	+	7278	na	na	na	na	na
scaffold1399_size7274	None	+	7274	na	na	na	na	na
scaffold1400_size7255	None	+	7255	na	na	na	na	na
scaffold1401_size7223	None	+	7223	na	na	na	na	na
scaffold1402_size7215	None	+	7215	na	na	na	na	na
scaffold1403_size7198	None	+	7198	na	na	na	na	na
scaffold1404_size7197	None	+	7197	na	na	na	na	na
scaffold1405_size7196	None	+	7196	na	na	na	na	na
scaffold1406_size7174	None	+	7174	na	na	na	na	na
scaffold1407_size7167	None	+	7167	na	na	na	na	na
scaffold1408_size7164	None	+	7164	na	na	na	na	na
scaffold1409_size7141	None	+	7141	na	na	na	na	na
scaffold1410_size7102	None	+	7102	na	na	na	na	na
scaffold1411_size7102	None	+	7102	na	na	na	na	na
scaffold1412_size7091	None	+	7091	na	na	na	na	na
scaffold1413_size7090	None	+	7090	na	na	na	na	na
scaffold1414_size7087	None	+	7087	na	na	na	na	na
scaffold1415_size7076	None	+	7076	na	na	na	na	na
scaffold1416_size7067	None	+	7067	na	na	na	na	na
scaffold1417_size7047	None	+	7047	na	na	na	na	na
scaffold1418_size7026	None	+	7026	na	na	na	na	na
scaffold1419_size7013	None	+	7013	na	na	na	na	na
scaffold1420_size6990	None	+	6990	na	na	na	na	na
scaffold1421_size6951	None	+	6951	na	na	na	na	na
scaffold1422_size6930	None	+	6930	na	na	na	na	na
scaffold1424_size6888	None	+	6888	na	na	na	na	na
scaffold1425_size6882	None	+	6882	na	na	na	na	na
scaffold1426_size6862	None	+	6862	na	na	na	na	na
scaffold1427_size6844	None	+	6844	na	na	na	na	na
scaffold1428_size6838	None	+	6838	na	na	na	na	na
scaffold1429_size6812	None	+	6812	na	na	na	na	na
scaffold1430_size6808	None	+	6808	na	na	na	na	na
scaffold1431_size6786	None	+	6786	na	na	na	na	na
scaffold1432_size6762	None	+	6762	na	na	na	na	na
scaffold1433_size6757	None	+	6757	na	na	na	na	na
scaffold1434_size6737	None	+	6737	na	na	na	na	na
scaffold1435_size6727	None	+	6727	na	na	na	na	na
scaffold1436_size6721	None	+	6721	na	na	na	na	na
scaffold1437_size6717	None	+	6717	na	na	na	na	na
scaffold1438_size6706	None	+	6706	na	na	na	na	na
scaffold1439_size6703	None	+	6703	na	na	na	na	na
scaffold1440_size6702	None	+	6702	na	na	na	na	na
scaffold1441_size6701	None	+	6701	na	na	na	na	na
scaffold1442_size6698	None	+	6698	na	na	na	na	na
scaffold1443_size6691	None	+	6691	na	na	na	na	na
scaffold1444_size6671	None	+	6671	na	na	na	na	na
scaffold1445_size6657	None	+	6657	na	na	na	na	na
scaffold1446_size6647	None	+	6647	na	na	na	na	na
scaffold1447_size6641	None	+	6641	na	na	na	na	na
scaffold1448_size6619	None	+	6619	na	na	na	na	na
scaffold1449_size6619	None	+	6619	na	na	na	na	na
scaffold1450_size6616	None	+	6616	na	na	na	na	na
scaffold1451_size6563	None	+	6563	na	na	na	na	na
scaffold1452_size6558	None	+	6558	na	na	na	na	na
scaffold1453_size6555	None	+	6555	na	na	na	na	na
scaffold1454_size6544	None	+	6544	na	na	na	na	na
scaffold1455_size6540	None	+	6540	na	na	na	na	na
scaffold1456_size6514	None	+	6514	na	na	na	na	na
scaffold1457_size6488	None	+	6488	na	na	na	na	na
scaffold1458_size6461	None	+	6461	na	na	na	na	na
scaffold1459_size6420	None	+	6420	na	na	na	na	na
scaffold1460_size6369	None	+	6369	na	na	na	na	na
scaffold1461_size6327	None	+	6327	na	na	na	na	na
scaffold1463_size6315	None	+	6315	na	na	na	na	na
scaffold1464_size6280	None	+	6280	na	na	na	na	na
scaffold1465_size6264	None	+	6264	na	na	na	na	na
scaffold1466_size6245	None	+	6245	na	na	na	na	na
scaffold1467_size6224	None	+	6224	na	na	na	na	na
scaffold1468_size6224	None	+	6224	na	na	na	na	na
scaffold1469_size6212	None	+	6212	na	na	na	na	na
scaffold1470_size6202	None	+	6202	na	na	na	na	na
scaffold1471_size6194	None	+	6194	na	na	na	na	na
scaffold1472_size6193	None	+	6193	na	na	na	na	na
scaffold1473_size6182	None	+	6182	na	na	na	na	na
scaffold1474_size6163	None	+	6163	na	na	na	na	na
scaffold1475_size6163	None	+	6163	na	na	na	na	na
scaffold1476_size6158	None	+	6158	na	na	na	na	na
scaffold1477_size6141	None	+	6141	na	na	na	na	na
scaffold1478_size6136	None	+	6136	na	na	na	na	na
scaffold1479_size6130	None	+	6130	na	na	na	na	na
scaffold1480_size6120	None	+	6120	na	na	na	na	na
scaffold1481_size6117	None	+	6117	na	na	na	na	na
scaffold1482_size6094	None	+	6094	na	na	na	na	na
scaffold1483_size6085	None	+	6085	na	na	na	na	na
scaffold1484_size6073	None	+	6073	na	na	na	na	na
scaffold1485_size6042	None	+	6042	na	na	na	na	na
scaffold1486_size6039	None	+	6039	na	na	na	na	na
scaffold1488_size6031	None	+	6031	na	na	na	na	na
scaffold1489_size6012	None	+	6012	na	na	na	na	na
scaffold1490_size6003	None	+	6003	na	na	na	na	na
scaffold1491_size5989	None	+	5989	na	na	na	na	na
scaffold1492_size5984	None	+	5984	na	na	na	na	na
scaffold1493_size5954	None	+	5954	na	na	na	na	na
scaffold1494_size5945	None	+	5945	na	na	na	na	na
scaffold1495_size5945	None	+	5945	na	na	na	na	na
scaffold1496_size5945	None	+	5945	na	na	na	na	na
scaffold1497_size5931	None	+	5931	na	na	na	na	na
scaffold1498_size5927	None	+	5927	na	na	na	na	na
scaffold1499_size5912	None	+	5912	na	na	na	na	na
scaffold1500_size5911	None	+	5911	na	na	na	na	na
scaffold1501_size5911	None	+	5911	na	na	na	na	na
scaffold1502_size5910	None	+	5910	na	na	na	na	na
scaffold1504_size5865	None	+	5865	na	na	na	na	na
scaffold1505_size5836	None	+	5836	na	na	na	na	na
scaffold1506_size5830	None	+	5830	na	na	na	na	na
scaffold1507_size5813	None	+	5813	na	na	na	na	na
scaffold1508_size5810	None	+	5810	na	na	na	na	na
scaffold1509_size5806	None	+	5806	na	na	na	na	na
scaffold1511_size5773	None	+	5773	na	na	na	na	na
scaffold1512_size5771	None	+	5771	na	na	na	na	na
scaffold1513_size5756	None	+	5756	na	na	na	na	na
scaffold1514_size5747	None	+	5747	na	na	na	na	na
scaffold1515_size5737	None	+	5737	na	na	na	na	na
scaffold1516_size5732	None	+	5732	na	na	na	na	na
scaffold1517_size5709	None	+	5709	na	na	na	na	na
scaffold1518_size5697	None	+	5697	na	na	na	na	na
scaffold1519_size5693	None	+	5693	na	na	na	na	na
scaffold1520_size5688	None	+	5688	na	na	na	na	na
scaffold1521_size5687	None	+	5687	na	na	na	na	na
scaffold1522_size5680	None	+	5680	na	na	na	na	na
scaffold1524_size5672	None	+	5672	na	na	na	na	na
scaffold1525_size5668	None	+	5668	na	na	na	na	na
scaffold1527_size5634	None	+	5634	na	na	na	na	na
scaffold1528_size5622	None	+	5622	na	na	na	na	na
scaffold1529_size5620	None	+	5620	na	na	na	na	na
scaffold1530_size5592	None	+	5592	na	na	na	na	na
scaffold1531_size5547	None	+	5547	na	na	na	na	na
scaffold1532_size5522	None	+	5522	na	na	na	na	na
scaffold1533_size5517	None	+	5517	na	na	na	na	na
scaffold1535_size5500	None	+	5500	na	na	na	na	na
scaffold1536_size5475	None	+	5475	na	na	na	na	na
scaffold1538_size5444	None	+	5444	na	na	na	na	na
scaffold1539_size5439	None	+	5439	na	na	na	na	na
scaffold1540_size5431	None	+	5431	na	na	na	na	na
scaffold1541_size5404	None	+	5404	na	na	na	na	na
scaffold1543_size5394	None	+	5394	na	na	na	na	na
scaffold1544_size5385	None	+	5385	na	na	na	na	na
scaffold1545_size5374	None	+	5374	na	na	na	na	na
scaffold1546_size5367	None	+	5367	na	na	na	na	na
scaffold1547_size5356	None	+	5356	na	na	na	na	na
scaffold1548_size5354	None	+	5354	na	na	na	na	na
scaffold1549_size5353	None	+	5353	na	na	na	na	na
scaffold1550_size5334	None	+	5334	na	na	na	na	na
scaffold1551_size5329	None	+	5329	na	na	na	na	na
scaffold1552_size5329	None	+	5329	na	na	na	na	na
scaffold1553_size5297	None	+	5297	na	na	na	na	na
scaffold1554_size5290	None	+	5290	na	na	na	na	na
scaffold1555_size5254	None	+	5254	na	na	na	na	na
scaffold1556_size5248	None	+	5248	na	na	na	na	na
scaffold1557_size5243	None	+	5243	na	na	na	na	na
scaffold1558_size5242	None	+	5242	na	na	na	na	na
scaffold1559_size5237	None	+	5237	na	na	na	na	na
scaffold1560_size5225	None	+	5225	na	na	na	na	na
scaffold1561_size5207	None	+	5207	na	na	na	na	na
scaffold1562_size5203	None	+	5203	na	na	na	na	na
scaffold1564_size5150	None	+	5150	na	na	na	na	na
scaffold1565_size5141	None	+	5141	na	na	na	na	na
scaffold1566_size5131	None	+	5131	na	na	na	na	na
scaffold1567_size5090	None	+	5090	na	na	na	na	na
scaffold1568_size5088	None	+	5088	na	na	na	na	na
scaffold1569_size5082	None	+	5082	na	na	na	na	na
scaffold1570_size5079	None	+	5079	na	na	na	na	na
scaffold1571_size5077	None	+	5077	na	na	na	na	na
scaffold1572_size5076	None	+	5076	na	na	na	na	na
scaffold1573_size5057	None	+	5057	na	na	na	na	na
scaffold1574_size5055	None	+	5055	na	na	na	na	na
scaffold1575_size5047	None	+	5047	na	na	na	na	na
scaffold1576_size5042	None	+	5042	na	na	na	na	na
scaffold1577_size5040	None	+	5040	na	na	na	na	na
scaffold1578_size5033	None	+	5033	na	na	na	na	na
scaffold1579_size4969	None	+	4969	na	na	na	na	na
scaffold1580_size4850	None	+	4850	na	na	na	na	na
scaffold1581_size4755	None	+	4755	na	na	na	na	na
scaffold1582_size4715	None	+	4715	na	na	na	na	na
scaffold1583_size4683	None	+	4683	na	na	na	na	na
scaffold1584_size4653	None	+	4653	na	na	na	na	na
scaffold1585_size4648	None	+	4648	na	na	na	na	na
scaffold1586_size4565	None	+	4565	na	na	na	na	na
scaffold1587_size4534	None	+	4534	na	na	na	na	na
scaffold1588_size4520	None	+	4520	na	na	na	na	na
scaffold1589_size4519	None	+	4519	na	na	na	na	na
scaffold1590_size4518	None	+	4518	na	na	na	na	na
scaffold1591_size4511	None	+	4511	na	na	na	na	na
scaffold1592_size4508	None	+	4508	na	na	na	na	na
scaffold1593_size4461	None	+	4461	na	na	na	na	na
scaffold1594_size4446	None	+	4446	na	na	na	na	na
scaffold1595_size4434	None	+	4434	na	na	na	na	na
scaffold1596_size4415	None	+	4415	na	na	na	na	na
scaffold1597_size4411	None	+	4411	na	na	na	na	na
scaffold1598_size4395	None	+	4395	na	na	na	na	na
scaffold1599_size4364	None	+	4364	na	na	na	na	na
scaffold1600_size4318	None	+	4318	na	na	na	na	na
scaffold1601_size4304	None	+	4304	na	na	na	na	na
scaffold1602_size4270	None	+	4270	na	na	na	na	na
scaffold1603_size4267	None	+	4267	na	na	na	na	na
scaffold1604_size4224	None	+	4224	na	na	na	na	na
scaffold1605_size4201	None	+	4201	na	na	na	na	na
scaffold1606_size4188	None	+	4188	na	na	na	na	na
scaffold1608_size4127	None	+	4127	na	na	na	na	na
scaffold1609_size4077	None	+	4077	na	na	na	na	na
scaffold1610_size4036	None	+	4036	na	na	na	na	na
scaffold1611_size4035	None	+	4035	na	na	na	na	na
scaffold1612_size4029	None	+	4029	na	na	na	na	na
scaffold1613_size3940	None	+	3940	na	na	na	na	na
scaffold1614_size3928	None	+	3928	na	na	na	na	na
scaffold1615_size3843	None	+	3843	na	na	na	na	na
scaffold1616_size3794	None	+	3794	na	na	na	na	na
scaffold1617_size3773	None	+	3773	na	na	na	na	na
scaffold1618_size3756	None	+	3756	na	na	na	na	na
scaffold1619_size3740	None	+	3740	na	na	na	na	na
scaffold1620_size3738	None	+	3738	na	na	na	na	na
scaffold1621_size3728	None	+	3728	na	na	na	na	na
scaffold1622_size3720	None	+	3720	na	na	na	na	na
scaffold1623_size3704	None	+	3704	na	na	na	na	na
scaffold1624_size3670	None	+	3670	na	na	na	na	na
scaffold1625_size3582	None	+	3582	na	na	na	na	na
scaffold1626_size3564	None	+	3564	na	na	na	na	na
scaffold1627_size3560	None	+	3560	na	na	na	na	na
scaffold1628_size3523	None	+	3523	na	na	na	na	na
scaffold1629_size3507	None	+	3507	na	na	na	na	na
scaffold1630_size3424	None	+	3424	na	na	na	na	na
scaffold1631_size3407	None	+	3407	na	na	na	na	na
scaffold1632_size3402	None	+	3402	na	na	na	na	na
scaffold1633_size3375	None	+	3375	na	na	na	na	na
scaffold1634_size3362	None	+	3362	na	na	na	na	na
scaffold1635_size3358	None	+	3358	na	na	na	na	na
scaffold1636_size3334	None	+	3334	na	na	na	na	na
scaffold1637_size3307	None	+	3307	na	na	na	na	na
scaffold1638_size3266	None	+	3266	na	na	na	na	na
scaffold1639_size3241	None	+	3241	na	na	na	na	na
scaffold1640_size3190	None	+	3190	na	na	na	na	na
scaffold1641_size3185	None	+	3185	na	na	na	na	na
scaffold1642_size3172	None	+	3172	na	na	na	na	na
scaffold1643_size3170	None	+	3170	na	na	na	na	na
scaffold1644_size3146	None	+	3146	na	na	na	na	na
scaffold1645_size3144	None	+	3144	na	na	na	na	na
scaffold1646_size3136	None	+	3136	na	na	na	na	na
scaffold1647_size3071	None	+	3071	na	na	na	na	na
scaffold1648_size3037	None	+	3037	na	na	na	na	na
scaffold1649_size3028	None	+	3028	na	na	na	na	na
scaffold1650_size3011	None	+	3011	na	na	na	na	na
scaffold1651_size2985	None	+	2985	na	na	na	na	na
scaffold1652_size2967	None	+	2967	na	na	na	na	na
scaffold1654_size2886	None	+	2886	na	na	na	na	na
scaffold1655_size2879	None	+	2879	na	na	na	na	na
scaffold1656_size2757	None	+	2757	na	na	na	na	na
scaffold1657_size2745	None	+	2745	na	na	na	na	na
scaffold1658_size2742	None	+	2742	na	na	na	na	na
scaffold1659_size2686	None	+	2686	na	na	na	na	na
scaffold1660_size2643	None	+	2643	na	na	na	na	na
scaffold1661_size2638	None	+	2638	na	na	na	na	na
scaffold1662_size2633	None	+	2633	na	na	na	na	na
scaffold1663_size2629	None	+	2629	na	na	na	na	na
scaffold1664_size2625	None	+	2625	na	na	na	na	na
scaffold1665_size2613	None	+	2613	na	na	na	na	na
scaffold1666_size2599	None	+	2599	na	na	na	na	na
scaffold1667_size2597	None	+	2597	na	na	na	na	na
scaffold1668_size2544	None	+	2544	na	na	na	na	na
scaffold1669_size2537	None	+	2537	na	na	na	na	na
scaffold1670_size2495	None	+	2495	na	na	na	na	na
scaffold1671_size2464	None	+	2464	na	na	na	na	na
scaffold1672_size2463	None	+	2463	na	na	na	na	na
scaffold1673_size2462	None	+	2462	na	na	na	na	na
scaffold1674_size2456	None	+	2456	na	na	na	na	na
scaffold1675_size2428	None	+	2428	na	na	na	na	na
scaffold1676_size2410	None	+	2410	na	na	na	na	na
scaffold1677_size2388	None	+	2388	na	na	na	na	na
scaffold1678_size2385	None	+	2385	na	na	na	na	na
scaffold1679_size2382	None	+	2382	na	na	na	na	na
scaffold1680_size2380	None	+	2380	na	na	na	na	na
scaffold1681_size2373	None	+	2373	na	na	na	na	na
scaffold1682_size2372	None	+	2372	na	na	na	na	na
scaffold1683_size2316	None	+	2316	na	na	na	na	na
scaffold1684_size2315	None	+	2315	na	na	na	na	na
scaffold1685_size2304	None	+	2304	na	na	na	na	na
scaffold1686_size2301	None	+	2301	na	na	na	na	na
scaffold1687_size2280	None	+	2280	na	na	na	na	na
scaffold1688_size2270	None	+	2270	na	na	na	na	na
scaffold1689_size2265	None	+	2265	na	na	na	na	na
scaffold1690_size2223	None	+	2223	na	na	na	na	na
scaffold1691_size2220	None	+	2220	na	na	na	na	na
scaffold1692_size2219	None	+	2219	na	na	na	na	na
scaffold1693_size2215	None	+	2215	na	na	na	na	na
scaffold1694_size2212	None	+	2212	na	na	na	na	na
scaffold1695_size2204	None	+	2204	na	na	na	na	na
scaffold1696_size2165	None	+	2165	na	na	na	na	na
scaffold1697_size2160	None	+	2160	na	na	na	na	na
scaffold1698_size2157	None	+	2157	na	na	na	na	na
scaffold1699_size2145	None	+	2145	na	na	na	na	na
scaffold1700_size2129	None	+	2129	na	na	na	na	na
scaffold1701_size2079	None	+	2079	na	na	na	na	na
scaffold1702_size2072	None	+	2072	na	na	na	na	na
scaffold1703_size2046	None	+	2046	na	na	na	na	na
scaffold1704_size2016	None	+	2016	na	na	na	na	na
scaffold1705_size1996	None	+	1996	na	na	na	na	na
scaffold1706_size1991	None	+	1991	na	na	na	na	na
scaffold1707_size1989	None	+	1989	na	na	na	na	na
scaffold1708_size1959	None	+	1959	na	na	na	na	na
scaffold1710_size1940	None	+	1940	na	na	na	na	na
scaffold1711_size1939	None	+	1939	na	na	na	na	na
scaffold1712_size1930	None	+	1930	na	na	na	na	na
scaffold1713_size1926	None	+	1926	na	na	na	na	na
scaffold1714_size1909	None	+	1909	na	na	na	na	na
scaffold1715_size1898	None	+	1898	na	na	na	na	na
scaffold1716_size1887	None	+	1887	na	na	na	na	na
scaffold1717_size1851	None	+	1851	na	na	na	na	na
scaffold1718_size1850	None	+	1850	na	na	na	na	na
scaffold1719_size1824	None	+	1824	na	na	na	na	na
scaffold1720_size1787	None	+	1787	na	na	na	na	na
scaffold1721_size1784	None	+	1784	na	na	na	na	na
scaffold1722_size1781	None	+	1781	na	na	na	na	na
scaffold1723_size1771	None	+	1771	na	na	na	na	na
scaffold1724_size1762	None	+	1762	na	na	na	na	na
scaffold1725_size1721	None	+	1721	na	na	na	na	na
scaffold1726_size1713	None	+	1713	na	na	na	na	na
scaffold1727_size1710	None	+	1710	na	na	na	na	na
scaffold1728_size1708	None	+	1708	na	na	na	na	na
scaffold1730_size1692	None	+	1692	na	na	na	na	na
scaffold1731_size1690	None	+	1690	na	na	na	na	na
scaffold1732_size1683	None	+	1683	na	na	na	na	na
scaffold1733_size1677	None	+	1677	na	na	na	na	na
scaffold1734_size1674	None	+	1674	na	na	na	na	na
scaffold1735_size1666	None	+	1666	na	na	na	na	na
scaffold1736_size1666	None	+	1666	na	na	na	na	na
scaffold1737_size1665	None	+	1665	na	na	na	na	na
scaffold1738_size1657	None	+	1657	na	na	na	na	na
scaffold1739_size1627	None	+	1627	na	na	na	na	na
scaffold1740_size1619	None	+	1619	na	na	na	na	na
scaffold1741_size1611	None	+	1611	na	na	na	na	na
scaffold1742_size1609	None	+	1609	na	na	na	na	na
scaffold1743_size1607	None	+	1607	na	na	na	na	na
scaffold1744_size1602	None	+	1602	na	na	na	na	na
scaffold1745_size1575	None	+	1575	na	na	na	na	na
scaffold1746_size1573	None	+	1573	na	na	na	na	na
scaffold1747_size1572	None	+	1572	na	na	na	na	na
scaffold1748_size1558	None	+	1558	na	na	na	na	na
scaffold1749_size1534	None	+	1534	na	na	na	na	na
scaffold1750_size1525	None	+	1525	na	na	na	na	na
scaffold1751_size1516	None	+	1516	na	na	na	na	na
scaffold1752_size1510	None	+	1510	na	na	na	na	na
scaffold1753_size1504	None	+	1504	na	na	na	na	na
scaffold1754_size1491	None	+	1491	na	na	na	na	na
scaffold1755_size1489	None	+	1489	na	na	na	na	na
scaffold1756_size1484	None	+	1484	na	na	na	na	na
scaffold1757_size1479	None	+	1479	na	na	na	na	na
scaffold1758_size1473	None	+	1473	na	na	na	na	na
scaffold1759_size1472	None	+	1472	na	na	na	na	na
scaffold1760_size1470	None	+	1470	na	na	na	na	na
scaffold1761_size1452	None	+	1452	na	na	na	na	na
scaffold1762_size1449	None	+	1449	na	na	na	na	na
scaffold1763_size1435	None	+	1435	na	na	na	na	na
scaffold1764_size1434	None	+	1434	na	na	na	na	na
scaffold1765_size1433	None	+	1433	na	na	na	na	na
scaffold1766_size1429	None	+	1429	na	na	na	na	na
scaffold1767_size1423	None	+	1423	na	na	na	na	na
scaffold1768_size1416	None	+	1416	na	na	na	na	na
scaffold1769_size1412	None	+	1412	na	na	na	na	na
scaffold1770_size1405	None	+	1405	na	na	na	na	na
scaffold1771_size1392	None	+	1392	na	na	na	na	na
scaffold1772_size1391	None	+	1391	na	na	na	na	na
scaffold1773_size1388	None	+	1388	na	na	na	na	na
scaffold1774_size1378	None	+	1378	na	na	na	na	na
scaffold1775_size1363	None	+	1363	na	na	na	na	na
scaffold1776_size1358	None	+	1358	na	na	na	na	na
scaffold1777_size1344	None	+	1344	na	na	na	na	na
scaffold1778_size1343	None	+	1343	na	na	na	na	na
scaffold1779_size1338	None	+	1338	na	na	na	na	na
scaffold1780_size1338	None	+	1338	na	na	na	na	na
scaffold1781_size1332	None	+	1332	na	na	na	na	na
scaffold1782_size1329	None	+	1329	na	na	na	na	na
scaffold1783_size1328	None	+	1328	na	na	na	na	na
scaffold1784_size1315	None	+	1315	na	na	na	na	na
scaffold1785_size1305	None	+	1305	na	na	na	na	na
scaffold1786_size1299	None	+	1299	na	na	na	na	na
scaffold1787_size1278	None	+	1278	na	na	na	na	na
scaffold1788_size1276	None	+	1276	na	na	na	na	na
scaffold1789_size1264	None	+	1264	na	na	na	na	na
scaffold1790_size1262	None	+	1262	na	na	na	na	na
scaffold1791_size1251	None	+	1251	na	na	na	na	na
scaffold1792_size1245	None	+	1245	na	na	na	na	na
scaffold1793_size1233	None	+	1233	na	na	na	na	na
scaffold1794_size1220	None	+	1220	na	na	na	na	na
scaffold1795_size1219	None	+	1219	na	na	na	na	na
scaffold1796_size1218	None	+	1218	na	na	na	na	na
scaffold1797_size1214	None	+	1214	na	na	na	na	na
scaffold1798_size1213	None	+	1213	na	na	na	na	na
scaffold1799_size1209	None	+	1209	na	na	na	na	na
scaffold1800_size1205	None	+	1205	na	na	na	na	na
scaffold1801_size1203	None	+	1203	na	na	na	na	na
scaffold1802_size1196	None	+	1196	na	na	na	na	na
scaffold1803_size1184	None	+	1184	na	na	na	na	na
scaffold1804_size1173	None	+	1173	na	na	na	na	na
scaffold1805_size1172	None	+	1172	na	na	na	na	na
scaffold1806_size1172	None	+	1172	na	na	na	na	na
scaffold1807_size1165	None	+	1165	na	na	na	na	na
scaffold1808_size1157	None	+	1157	na	na	na	na	na
scaffold1809_size1144	None	+	1144	na	na	na	na	na
scaffold1810_size1130	None	+	1130	na	na	na	na	na
scaffold1811_size1130	None	+	1130	na	na	na	na	na
scaffold1812_size1112	None	+	1112	na	na	na	na	na
scaffold1813_size1106	None	+	1106	na	na	na	na	na
scaffold1814_size1100	None	+	1100	na	na	na	na	na
scaffold1815_size1100	None	+	1100	na	na	na	na	na
scaffold1816_size1095	None	+	1095	na	na	na	na	na
scaffold1817_size1094	None	+	1094	na	na	na	na	na
scaffold1818_size1094	None	+	1094	na	na	na	na	na
scaffold1819_size1088	None	+	1088	na	na	na	na	na
scaffold1820_size1088	None	+	1088	na	na	na	na	na
scaffold1821_size1084	None	+	1084	na	na	na	na	na
scaffold1822_size1076	None	+	1076	na	na	na	na	na
scaffold1823_size1070	None	+	1070	na	na	na	na	na
scaffold1824_size1052	None	+	1052	na	na	na	na	na
scaffold1825_size1045	None	+	1045	na	na	na	na	na
scaffold1826_size1043	None	+	1043	na	na	na	na	na
scaffold1827_size1032	None	+	1032	na	na	na	na	na
scaffold1828_size1030	None	+	1030	na	na	na	na	na
scaffold1829_size1016	None	+	1016	na	na	na	na	na
scaffold1830_size1016	None	+	1016	na	na	na	na	na

## Sheet: Urenif Vs Vvinifera
Query	Target	Strand	Q-len	Q-start	Q-stop	T-len	T-start	T-stop
scaffold1382_size7624	chr1	+	7624	4158	5144	23037639	259299	260276
scaffold664_size111833	chr1	+	111833	47984	52032	23037639	259299	260276
scaffold878_size42927	chr1	+	42927	35255	35525	23037639	259817	260120
scaffold282_size362278	chr1	+	362278	56776	57088	23037639	259810	260147
scaffold746_size79265	chr1	+	79265	62201	62513	23037639	259810	260147
scaffold492_size200913	chr1	+	200913	61269	98989	23037639	259299	486217
scaffold1127_size16359	chr1	+	16359	8084	14724	23037639	303466	372382
scaffold159_size538032	chr1	+	538032	204222	252424	23037639	259317	510637
scaffold893_size39817	chr1	+	39817	17649	18923	23037639	1992359	1993678
scaffold418_size248570	chr1	+	248570	15806	15911	23037639	3740089	3740194
scaffold457_size221634	chr1	+	221634	164100	197721	23037639	3902513	4657652
scaffold197_size466181	chr1	+	466181	137576	196739	23037639	4657589	5904602
scaffold735_size82422	chr1	+	82422	1756	74586	23037639	4657589	5904602
scaffold937_size31582	chr1	+	31582	6510	7071	23037639	5903972	5904602
scaffold1534_size5505	chr1	+	5505	810	1537	23037639	6321635	6322358
scaffold1210_size12088	chr1	+	12088	11707	11894	23037639	6765744	6765931
scaffold119_size622808	chr1	+	622808	77005	80717	23037639	6852787	6856496
scaffold970_size27896	chr1	+	27896	4853	5323	23037639	7095700	7096170
scaffold100_size686073	chr1	+	686073	109504	237402	23037639	3466003	16523995
scaffold778_size68176	chr1	+	68176	42478	63045	23037639	8671052	10068463
scaffold405_size257100	chr1	+	257100	5106	49403	23037639	10068153	11467418
scaffold815_size57204	chr1	+	57204	51049	52735	23037639	12555198	12556996
scaffold345_size313805	chr1	+	313805	196681	197845	23037639	13820586	13821752
scaffold43_size1025288	chr1	+	1025288	54488	55811	23037639	13820586	13821943
scaffold601_size134591	chr1	+	134591	114804	115933	23037639	15576518	15577648
scaffold106_size656854	chr1	+	656854	417100	418929	23037639	15916830	15918641
scaffold237_size412359	chr1	+	412359	100321	333866	23037639	1824410	16119206
scaffold835_size52192	chr1	+	52192	38632	39202	23037639	16535638	16536264
scaffold407_size254605	chr1	+	254605	142241	212522	23037639	14046647	18154699
scaffold124_size609810	chr1	+	609810	16090	67187	23037639	11578578	19692682
scaffold152_size557608	chr1	+	557608	549462	551824	23037639	18152323	18154699
scaffold173_size512803	chr1	+	512803	395552	397903	23037639	18152323	18154699
scaffold11_size1489916	chr1	+	1489916	840323	842534	23037639	18479578	18481757
scaffold287_size357018	chr1	+	357018	312246	312999	23037639	19544456	19545118
scaffold2_size1816428	chr1	+	1816428	237544	1354603	23037639	6765744	22695555
scaffold145_size568489	chr1	+	568489	293421	295328	23037639	19689770	19691672
scaffold181_size493926	chr1	+	493926	214683	217742	23037639	19689608	19692613
scaffold131_size602077	chr1	+	602077	326712	328222	23037639	19690457	19691954
scaffold435_size236645	chr1	+	236645	105358	105795	23037639	19691616	19692056
scaffold442_size230434	chr1	+	230434	89731	90821	23037639	19691616	19692682
scaffold193_size469430	chr1	+	469430	14933	15424	23037639	19989361	19989898
scaffold369_size285830	chr1	+	285830	283101	283197	23037639	20706543	20706637
scaffold207_size453297	chr1	+	453297	241401	291602	23037639	21386089	22695555
scaffold850_size47126	chr1	+	47126	5703	6228	23037639	22598558	22599069
scaffold686_size102709	chr10	+	102709	19197	20052	18140952	1456748	1457603
scaffold208_size452143	chr10	+	452143	88869	89771	18140952	2653094	2653946
scaffold128_size606351	chr10	+	606351	238416	239665	18140952	3106231	3107480
scaffold901_size37753	chr10	+	37753	435	5776	18140952	5026795	5027328
scaffold331_size322110	chr10	+	322110	249978	279689	18140952	4991478	6376238
scaffold449_size226149	chr10	+	226149	146057	147162	18140952	5789105	5790210
scaffold187_size480904	chr10	+	480904	189004	280406	18140952	6208676	7243453
scaffold217_size439810	chr10	+	439810	51511	53768	18140952	6796431	6798746
scaffold219_size438390	chr10	+	438390	96001	99028	18140952	7190959	7193985
scaffold403_size258745	chr10	+	258745	52930	54461	18140952	7355579	7357110
scaffold668_size110816	chr10	+	110816	104124	104652	18140952	8336715	8337292
scaffold986_size26532	chr10	+	26532	19840	20368	18140952	8336715	8337292
scaffold500_size197362	chr10	+	197362	106522	124333	18140952	5230510	8991457
scaffold269_size371661	chr10	+	371661	128425	129217	18140952	11506621	11507413
scaffold453_size224172	chr10	+	224172	156259	158329	18140952	13177826	13179850
scaffold213_size443723	chr10	+	443723	21255	23355	18140952	13177826	13313377
scaffold602_size134299	chr10	+	134299	88810	92244	18140952	13176689	13313210
scaffold488_size202194	chr10	+	202194	79929	80630	18140952	15028726	15029445
scaffold582_size142586	chr10	+	142586	38643	39765	18140952	17026809	17027930
scaffold949_size30103	chr10_random	+	30103	2454	2527	789605	17523	39718
scaffold567_size152524	chr10_random	+	152524	140612	140865	789605	207048	207301
scaffold615_size129786	chr10_random	+	129786	36227	36480	789605	207048	207301
scaffold1008_size24807	chr11	-	24807	7145	8111	19818926	124822	125821
scaffold892_size39960	chr11	+	39960	1481	1586	19818926	508614	508719
scaffold1083_size18907	chr11	+	18907	12705	15756	19818926	823584	823658
scaffold302_size345264	chr11	+	345264	330236	331748	19818926	1856606	1858274
scaffold651_size116853	chr11	+	116853	73372	73463	19818926	2167062	2167153
scaffold823_size54560	chr11	+	54560	26711	27565	19818926	2680219	2681066
scaffold140_size577704	chr11	+	577704	461711	463103	19818926	2769431	2770935
scaffold376_size278392	chr11	+	278392	28504	29136	19818926	2799629	2800258
scaffold588_size139614	chr11	+	139614	13363	14007	19818926	2799677	2800321
scaffold284_size359695	chr11	+	359695	6685	8800	19818926	3358914	3361023
scaffold292_size352950	chr11	+	352950	208827	210504	19818926	5285411	5287160
scaffold420_size247594	chr11	+	247594	126482	126930	19818926	6143713	6144160
scaffold629_size126420	chr11	+	126420	23830	24574	19818926	8113862	8114594
scaffold438_size236227	chr11	+	236227	151530	152725	19818926	8378029	8379212
scaffold210_size448060	chr11	+	448060	42813	55549	19818926	10257975	10264238
scaffold565_size154525	chr11	+	154525	94881	98224	19818926	10555681	10558926
scaffold480_size206361	chr11	+	206361	23778	134662	19818926	9111104	18109112
scaffold137_size581237	chr11	+	581237	2033	15073	19818926	16626883	18109269
scaffold569_size149915	chr11	+	149915	73252	73920	19818926	19099105	19099774
scaffold1449_size6619	chr12	-	6619	5456	6464	22702307	609605	610594
scaffold555_size160189	chr12	+	160189	121430	121585	22702307	709775	710009
scaffold744_size79833	chr12	+	79833	31477	32033	22702307	931807	932363
scaffold441_size232911	chr12	+	232911	25938	26004	22702307	1111344	1111410
scaffold841_size49873	chr12	+	49873	36058	36539	22702307	931892	9273638
scaffold157_size542792	chr12	+	542792	131069	316286	22702307	3829070	15364298
scaffold247_size396517	chr12	+	396517	125013	126674	22702307	5129455	5131116
scaffold195_size468173	chr12	+	468173	3064	254135	22702307	5129449	17481283
scaffold670_size110176	chr12	+	110176	92761	92849	22702307	6938023	6938111
scaffold225_size433522	chr12	+	433522	54975	55272	22702307	7210291	7210751
scaffold132_size599623	chr12	+	599623	140750	141210	22702307	7213071	7213526
scaffold704_size94736	chr12	+	94736	16653	18515	22702307	7031351	17481283
scaffold266_size374472	chr12	+	374472	322441	326161	22702307	8220410	8224124
scaffold1388_size7492	chr12	+	7492	2023	5911	22702307	8679220	8679407
scaffold609_size132898	chr12	+	132898	102092	102339	22702307	9009451	9009731
scaffold374_size280266	chr12	+	280266	2742	4002	22702307	9657978	9659275
scaffold464_size216925	chr12	+	216925	56635	57788	22702307	9864596	12121647
scaffold421_size247372	chr12	+	247372	134798	138432	22702307	17143028	17146734
scaffold446_size227560	chr12	+	227560	86242	86712	22702307	17379606	17380078
scaffold700_size95485	chr12	+	95485	8359	8829	22702307	17379606	17380078
scaffold494_size199745	chr12	+	199745	98827	100318	22702307	17952519	17954033
scaffold1132_size15961	chr12	+	15961	76	331	22702307	19522433	19522653
scaffold608_size133036	chr12	+	133036	4860	7463	22702307	19522484	19522738
scaffold15_size1429888	chr12	+	1429888	1157186	1161281	22702307	21144134	21148102
scaffold436_size236557	chr12	+	236557	205144	206152	22702307	22580036	22580922
scaffold656_size115366	chr12	+	115366	76009	76095	22702307	22691862	22691997
scaffold404_size257756	chr12_random	+	257756	249863	251108	1566225	372944	374170
scaffold98_size696804	chr13	+	696804	249920	253958	24396255	530433	534540
scaffold316_size337115	chr13	+	337115	99846	104020	24396255	744511	748868
scaffold372_size281874	chr13	+	281874	181237	183544	24396255	746348	748730
scaffold99_size687872	chr13	+	687872	77896	78854	24396255	1073465	1074429
scaffold347_size306357	chr13	+	306357	91441	93480	24396255	3014748	3016947
scaffold1076_size19232	chr13	+	19232	947	2363	24396255	3015856	3017284
scaffold640_size121989	chr13	+	121989	38193	38905	24396255	3477192	3477900
scaffold1054_size21101	chr13	+	21101	19456	20069	24396255	3664889	3665494
scaffold543_size170649	chr13	+	170649	121622	121694	24396255	3890000	3890072
scaffold122_size611765	chr13	+	611765	302621	338462	24396255	3975427	5166585
scaffold957_size29101	chr13	+	29101	2455	2874	24396255	4771114	4771533
scaffold190_size480112	chr13	+	480112	385393	387868	24396255	4901017	4903519
scaffold482_size205035	chr13	+	205035	102815	105078	24396255	5165666	5167881
scaffold165_size523336	chr13	+	523336	511749	513595	24396255	8898051	8900077
scaffold712_size91892	chr13	+	91892	80305	82151	24396255	8898051	8900077
scaffold211_size447269	chr13	+	447269	333650	334000	24396255	9016972	9017349
scaffold444_size228446	chr13	+	228446	181949	182299	24396255	9016972	9017349
scaffold570_size149786	chr13	+	149786	64475	66401	24396255	9903060	9918382
scaffold154_size551747	chr13	+	551747	369986	370057	24396255	11911640	11911711
scaffold1487_size6036	chr13	-	6036	4483	5736	24396255	11912756	11914009
scaffold1709_size1949	chr13	-	1949	206	1691	24396255	11912756	11914186
scaffold218_size439493	chr13	+	439493	252007	253763	24396255	13381575	13383357
scaffold333_size321185	chr13	+	321185	62591	63342	24396255	14603837	14604597
scaffold455_size221765	chr13	+	221765	9484	9592	24396255	14741694	14741806
scaffold752_size77146	chr13	+	77146	38661	38807	24396255	12083223	17935318
scaffold427_size242665	chr13	+	242665	76924	76980	24396255	15727373	15727429
scaffold78_size780330	chr13	+	780330	672953	673909	24396255	15868122	15869082
scaffold671_size110097	chr13	+	110097	38987	40316	24396255	15868122	15869460
scaffold355_size298094	chr13	+	298094	190243	192841	24396255	15868362	15870964
scaffold16_size1429268	chr13	+	1429268	1118213	1345662	24396255	15868122	22836660
scaffold417_size248619	chr13	+	248619	9823	17843	24396255	16246390	16254408
scaffold186_size484970	chr13	+	484970	67496	68275	24396255	18232054	18232830
scaffold378_size277705	chr13	+	277705	16221	245943	24396255	4775239	20976682
scaffold67_size845796	chr13	+	845796	337603	339495	24396255	18345760	18347655
scaffold723_size89902	chr13	+	89902	43552	44753	24396255	20331989	20333215
scaffold182_size489013	chr13	+	489013	209504	210712	24396255	20331989	20333215
scaffold389_size273484	chr13	+	273484	13947	255379	24396255	9914296	20976682
scaffold66_size848830	chr13	+	848830	376940	380725	24396255	20972790	20976682
scaffold811_size58044	chr13	+	58044	44841	48626	24396255	20972790	20976682
scaffold342_size317645	chr13	+	317645	190666	197073	24396255	20973899	20976682
scaffold461_size219499	chr13	+	219499	6274	153041	24396255	20973899	22077480
scaffold306_size343137	chr13	+	343137	152795	155667	24396255	21789434	21792296
scaffold1142_size15455	chr13	+	15455	8971	9181	24396255	22077270	22077480
scaffold1179_size13919	chr13	+	13919	7153	7363	24396255	22077270	22077480
scaffold673_size109591	chr13	+	109591	75512	76498	24396255	22441917	22442908
scaffold147_size561064	chr13	+	561064	293859	299261	24396255	22813830	22819252
scaffold520_size185269	chr13	+	185269	66576	73742	24396255	23216560	23237206
scaffold359_size295461	chr13_random	+	295461	256969	258886	3268264	875814	877753
scaffold577_size145990	chr14	+	145990	59797	60866	30274277	450114	451183
scaffold243_size401479	chr14	+	401479	337031	365880	30274277	617828	658897
scaffold532_size179252	chr14	+	179252	104777	106596	30274277	1025165	1027046
scaffold642_size121732	chr14	+	121732	76750	79040	30274277	1035114	1037382
scaffold368_size285942	chr14	+	285942	76298	79493	30274277	1725977	1729074
scaffold214_size443516	chr14	+	443516	6585	12020	30274277	1725977	1730991
scaffold523_size183550	chr14	+	183550	110643	119126	30274277	1389922	26145335
scaffold475_size210170	chr14	+	210170	158472	162910	30274277	2376589	4215393
scaffold1397_size7288	chr14	-	7288	1177	2422	30274277	3222680	3224020
scaffold116_size639307	chr14	+	639307	265276	380713	30274277	3222680	25560108
scaffold178_size500592	chr14	+	500592	195793	460059	30274277	2376589	5347691
scaffold72_size829870	chr14	+	829870	39989	525723	30274277	4563588	26018264
scaffold21_size1333958	chr14	+	1333958	257642	707474	30274277	3693361	26424896
scaffold31_size1122664	chr14	+	1122664	2057	624983	30274277	5122583	14465061
scaffold3_size1784162	chr14	+	1784162	325452	1657714	30274277	2376589	26018264
scaffold934_size31994	chr14	+	31994	22532	23312	30274277	7365951	7366752
scaffold110_size649966	chr14	+	649966	347199	484839	30274277	7440316	10952485
scaffold951_size30028	chr14	+	30028	10703	11400	30274277	7777703	7778464
scaffold801_size61522	chr14	+	61522	1393	1630	30274277	7780914	7781157
scaffold745_size79788	chr14	+	79788	16368	17595	30274277	8052142	8053369
scaffold144_size572261	chr14	+	572261	248156	264991	30274277	7777703	10299899
scaffold42_size1040323	chr14	+	1040323	321535	800041	30274277	2003574	29263010
scaffold390_size273192	chr14	+	273192	21589	27400	30274277	10277935	10279454
scaffold273_size369092	chr14	+	369092	270836	272333	30274277	10277935	10279454
scaffold216_size441981	chr14	+	441981	109171	364662	30274277	2821921	10793134
scaffold231_size422325	chr14	+	422325	8253	12474	30274277	10397268	10401473
scaffold514_size186587	chr14	+	186587	151172	152321	30274277	10789480	10790645
scaffold127_size606493	chr14	+	606493	549491	551743	30274277	468727	28250498
scaffold732_size84355	chr14	+	84355	75503	76493	30274277	15463482	15464473
scaffold798_size61987	chr14	-	61987	38373	40681	30274277	20210295	20212772
scaffold1029_size23488	chr14	+	23488	10245	10319	30274277	17398877	24107709
scaffold97_size696948	chr14	+	696948	123857	286297	30274277	17741706	25735480
scaffold558_size158525	chr14	+	158525	48911	153260	30274277	21304911	22320099
scaffold346_size309305	chr14	+	309305	178711	182213	30274277	21760879	21764412
scaffold126_size606685	chr14	+	606685	23623	551649	30274277	21760819	22622715
scaffold354_size300507	chr14	+	300507	27753	113217	30274277	117215	23171337
scaffold382_size276227	chr14	+	276227	244720	245935	30274277	23084818	23086018
scaffold414_size249511	chr14	+	249511	230027	242012	30274277	22897064	30041462
scaffold816_size56846	chr14	+	56846	37249	37725	30274277	26241840	26242338
scaffold415_size249257	chr14	+	249257	80349	225469	30274277	26573014	28071380
scaffold595_size138481	chr14	+	138481	21097	22064	30274277	28070595	28071580
scaffold174_size508446	chr14	+	508446	2788	372690	30274277	26145287	28551448
scaffold649_size118696	chr14	+	118696	104942	115462	30274277	28070307	28551448
scaffold1162_size14770	chr14	+	14770	12907	14194	30274277	28550067	28551448
scaffold1205_size12494	chr14	+	12494	10631	11918	30274277	28550067	28551448
scaffold293_size352734	chr14	+	352734	166060	303956	30274277	27583194	28635654
scaffold425_size243727	chr14	+	243727	235069	239216	30274277	29225098	29263010
scaffold40_size1048927	chr14	+	1048927	230228	248517	30274277	29211841	30135695
scaffold236_size412999	chr15	+	412999	349021	349751	20304914	2854664	2855398
scaffold397_size264925	chr15	+	264925	116602	116711	20304914	4137024	4295221
scaffold255_size387927	chr15	+	387927	88436	90430	20304914	5048283	5050282
scaffold515_size186375	chr15	+	186375	59545	63511	20304914	5048283	5052233
scaffold337_size319475	chr15	+	319475	56901	58879	20304914	5048283	8391659
scaffold22_size1326342	chr15	+	1326342	109796	1057367	20304914	1033693	16134520
scaffold209_size449185	chr15	+	449185	100206	102642	20304914	6147346	6149768
scaffold19_size1367837	chr15	+	1367837	71545	77555	20304914	5048283	8391659
scaffold471_size212349	chr15	+	212349	104921	104974	20304914	9753530	9753583
scaffold578_size145013	chr15	+	145013	100784	103849	20304914	11841787	11844926
scaffold398_size264306	chr15	+	264306	149526	150067	20304914	12773575	12774135
scaffold348_size306083	chr15	+	306083	158894	160644	20304914	11294211	14703611
scaffold424_size243908	chr15	+	243908	93624	94214	20304914	13742589	13743245
scaffold613_size131457	chr15	+	131457	49424	59112	20304914	2066717	14909625
scaffold10_size1516488	chr15	+	1516488	735925	739508	20304914	14906017	14909702
scaffold695_size97738	chr15	+	97738	95643	96547	20304914	14959492	14960463
scaffold729_size86916	chr15	+	86916	5980	6884	20304914	14959492	14960463
scaffold724_size89489	chr15	+	89489	28662	29652	20304914	14147981	15773060
scaffold61_size863762	chr15	+	863762	749599	753422	20304914	15631107	15632400
scaffold772_size70005	chr15	+	70005	11848	11967	20304914	15915313	16440079
scaffold201_size464543	chr15	+	464543	92675	92919	20304914	17133347	17133591
scaffold411_size250506	chr15	+	250506	81645	86084	20304914	17601621	17606079
scaffold818_size56322	chr15	+	56322	3055	3982	20304914	18488261	18489185
scaffold684_size103286	chr15	+	103286	41714	41801	20304914	18583903	18583990
scaffold519_size185338	chr15	+	185338	94442	97370	20304914	19091410	19094424
scaffold334_size320946	chr16	+	320946	238367	239078	22053297	247378	248089
scaffold940_size31079	chr16	-	31079	12597	14409	22053297	2097425	2099388
scaffold740_size80664	chr16	+	80664	40814	41494	22053297	1599191	10140899
scaffold272_size369917	chr16	+	369917	145593	146395	22053297	6285909	6286717
scaffold54_size918619	chr16	+	918619	812330	813761	22053297	6285909	6287337
scaffold179_size500287	chr16	+	500287	123999	130085	22053297	6285909	6287337
scaffold264_size378400	chr16	+	378400	11244	12655	22053297	6285909	6287337
scaffold311_size339713	chr16	+	339713	26875	28293	22053297	6285909	6287337
scaffold522_size183876	chr16	+	183876	35247	84305	22053297	6285909	21914383
scaffold351_size304134	chr16	+	304134	54147	302590	22053297	8372943	16123027
scaffold25_size1264610	chr16	+	1264610	512114	513633	22053297	12903094	12904631
scaffold646_size119134	chr16	+	119134	91579	92883	22053297	13254028	13255331
scaffold716_size91399	chr16	+	91399	14564	17441	22053297	7751055	14587410
scaffold161_size531985	chr16	+	531985	59892	60921	22053297	14019510	14020620
scaffold718_size90744	chr16	+	90744	10676	11704	22053297	14019510	14020620
scaffold379_size277413	chr16	+	277413	30597	33333	22053297	14062835	14065620
scaffold240_size406237	chr16	+	406237	87444	88566	22053297	14584329	14585470
scaffold450_size225824	chr16	+	225824	25344	27408	22053297	14584971	14587026
scaffold56_size905644	chr16	+	905644	485043	488916	22053297	14584557	14588438
scaffold297_size348767	chr16	+	348767	15978	246566	22053297	247378	20674840
scaffold338_size319425	chr16	+	319425	219662	220029	22053297	15796616	15796983
scaffold71_size832853	chr16	+	832853	341854	349834	22053297	15796616	15798267
scaffold366_size288142	chr16	+	288142	116555	116830	22053297	16198481	16198771
scaffold226_size429880	chr16	+	429880	364182	364828	22053297	17883693	17884442
scaffold1123_size16487	chr16	+	16487	8740	9386	22053297	17883693	17884442
scaffold121_size616638	chr16	+	616638	110853	352458	22053297	13254028	21185543
scaffold6_size1644274	chr16	+	1644274	21913	23202	22053297	18055594	18056883
scaffold323_size325199	chr16	+	325199	198362	199651	22053297	18055594	18056883
scaffold23_size1301348	chr16	+	1301348	135343	137760	22053297	20861187	20863630
scaffold291_size352991	chr16	+	352991	107473	107612	22053297	21536808	21536947
scaffold115_size639320	chr16	+	639320	13738	15887	22053297	21739312	21741733
scaffold765_size72457	chr16	+	72457	6443	7795	22053297	21760592	21761944
scaffold1126_size16433	chr17	+	16433	14993	15526	17126926	2369463	2370008
scaffold611_size132032	chr17	+	132032	23159	46043	17126926	2231323	12506741
scaffold1019_size23903	chr17	+	23903	4080	4551	17126926	4781517	4781998
scaffold1188_size13387	chr17	+	13387	8524	8995	17126926	4781517	4781998
scaffold1318_size8943	chr17	+	8943	4080	4551	17126926	4781517	4781998
scaffold1145_size15395	chr17	+	15395	4134	4399	17126926	6044724	6045015
scaffold317_size334483	chr17	+	334483	195906	225665	17126926	6244502	6804727
scaffold1046_size21631	chr17	+	21631	12633	13136	17126926	6804224	6804727
scaffold551_size162907	chr17	+	162907	58604	59104	17126926	6804227	6804727
scaffold930_size32777	chr17	+	32777	3993	5341	17126926	7659793	7661141
scaffold780_size67079	chr17	+	67079	7261	8187	17126926	7660215	7661141
scaffold799_size61746	chr17	+	61746	20077	20605	17126926	8522225	8522757
scaffold754_size76731	chr17	+	76731	70857	71972	17126926	8836868	8837930
scaffold623_size127870	chr17	+	127870	73392	77480	17126926	8518620	11346878
scaffold118_size635519	chr17	+	635519	547463	578811	17126926	9807393	10679107
scaffold549_size164026	chr17	+	164026	89667	92278	17126926	8520185	11346878
scaffold358_size295937	chr17	+	295937	261473	261689	17126926	10886823	10887040
scaffold313_size338943	chr17	+	338943	19257	20139	17126926	11174181	11175408
scaffold60_size871532	chr17	+	871532	764444	767054	17126926	11344192	11346878
scaffold1423_size6920	chr17	+	6920	3609	3663	17126926	11545723	11545777
scaffold451_size225693	chr17	+	225693	92541	94140	17126926	11736270	11737929
scaffold876_size43045	chr17	+	43045	4596	5169	17126926	11777245	11777815
scaffold46_size1006163	chr17	+	1006163	989601	1005480	17126926	14227676	15817403
scaffold386_size274479	chr17	+	274479	39485	81158	17126926	14229704	15817408
scaffold205_size458316	chr17	+	458316	153934	421632	17126926	8734653	15817408
scaffold928_size33278	chr17	+	33278	15525	15730	17126926	16046850	16047055
scaffold598_size135460	chr17	+	135460	79835	80603	17126926	16467075	16467842
scaffold401_size261616	chr17	+	261616	253113	254067	17126926	16467066	16468022
scaffold605_size133348	chr17	+	133348	110213	111167	17126926	16467066	16468022
scaffold252_size390766	chr17	+	390766	173861	174848	17126926	16776012	16776998
scaffold79_size776185	chr17_random	+	776185	49007	51081	829735	350567	352678
scaffold262_size380975	chr18	+	380975	282904	283450	29360087	928766	929308
scaffold1361_size8112	chr18	+	8112	5461	5533	29360087	1583670	1583742
scaffold669_size110238	chr18	-	110238	52164	76226	29360087	1604165	7541091
scaffold536_size174755	chr18	+	174755	146634	147190	29360087	1701204	1702443
scaffold413_size249949	chr18	+	249949	122035	122964	29360087	1730562	1731491
scaffold160_size534036	chr18	+	534036	138468	138549	29360087	2896034	2896115
scaffold49_size979919	chr18	+	979919	185434	838360	29360087	2472153	25196600
scaffold706_size94229	chr18	+	94229	53190	53367	29360087	4033527	4033703
scaffold344_size316065	chr18	+	316065	209975	210317	29360087	5983993	5984335
scaffold1050_size21304	chr18	+	21304	10248	10590	29360087	5983993	5984335
scaffold1052_size21236	chr18	+	21236	10248	10590	29360087	5983993	5984335
scaffold548_size165573	chr18	+	165573	59277	60836	29360087	6136035	6137654
scaffold483_size203934	chr18	+	203934	173072	173710	29360087	6389247	6389885
scaffold149_size559883	chr18	+	559883	544905	545151	29360087	7034952	7035237
scaffold573_size148756	chr18	+	148756	41605	41851	29360087	7034952	7035237
scaffold180_size499775	chr18	+	499775	46252	407087	29360087	6136035	17283416
scaffold220_size437153	chr18	+	437153	168804	169207	29360087	7602321	7602803
scaffold172_size512938	chr18	+	512938	227668	232505	29360087	8273235	8278158
scaffold921_size34329	chr18	+	34329	7452	7730	29360087	8519823	8520101
scaffold108_size655003	chr18	+	655003	63798	67241	29360087	8553134	8556720
scaffold249_size395244	chr18	+	395244	341065	342003	29360087	8756748	8758356
scaffold432_size238105	chr18	+	238105	136536	137602	29360087	9491273	9492356
scaffold524_size182843	chr18	+	182843	121159	121800	29360087	10014050	10014691
scaffold1280_size9771	chr18	+	9771	5142	5227	29360087	11178254	11178339
scaffold341_size317742	chr18	+	317742	160639	162263	29360087	11497441	11499068
scaffold367_size287238	chr18	+	287238	139693	142238	29360087	11497810	11500778
scaffold230_size422617	chr18	+	422617	113	481	29360087	11500410	11500778
scaffold244_size401050	chr18	+	401050	3467	100766	29360087	928766	19523947
scaffold289_size354729	chr18	+	354729	34949	35919	29360087	11698208	11699181
scaffold447_size226588	chr18	+	226588	118773	121686	29360087	11715366	11718281
scaffold659_size114351	chr18	+	114351	77467	77537	29360087	10582528	12925234
scaffold227_size428916	chr18	+	428916	25610	293415	29360087	11364845	25257821
scaffold1098_size17586	chr18	+	17586	13820	13922	29360087	12732911	12733013
scaffold274_size368324	chr18	+	368324	30558	31258	29360087	13701297	13701997
scaffold325_size324394	chr18	+	324394	26215	27134	29360087	13924421	13925340
scaffold392_size272084	chr18	+	272084	230288	231207	29360087	13924421	13925340
scaffold768_size71420	chr18	+	71420	31888	32807	29360087	13924421	13925340
scaffold509_size189280	chr18	+	189280	18685	19320	29360087	14165183	14165818
scaffold622_size128123	chr18	+	128123	63833	64424	29360087	14382230	16305739
scaffold807_size59305	chr18	+	59305	44395	44872	29360087	17282927	17283401
scaffold52_size936991	chr18	+	936991	851111	851603	29360087	17282927	17283416
scaffold396_size267761	chr18	+	267761	211160	218539	29360087	19521383	19672528
scaffold305_size343860	chr18	+	343860	27790	34830	29360087	19665302	19672259
scaffold637_size123618	chr18	+	123618	53827	54471	29360087	20363164	20363836
scaffold539_size172833	chr18	+	172833	60320	63031	29360087	20365340	20368051
scaffold705_size94633	chr18	+	94633	45690	85279	29360087	19523309	20955649
scaffold1113_size16751	chr18	+	16751	5909	6918	29360087	20954633	20955649
scaffold162_size531800	chr18	+	531800	302117	304476	29360087	21172865	21175243
scaffold486_size202863	chr18	+	202863	101297	102235	29360087	23079286	23080207
scaffold57_size904867	chr18	+	904867	115075	800524	29360087	1586197	24851798
scaffold1002_size25184	chr18	+	25184	865	1254	29360087	25257424	25257813
scaffold375_size279719	chr18	+	279719	102540	107605	29360087	25820690	25825758
scaffold840_size50587	chr18	-	50587	42220	46133	29360087	26272488	26276389
scaffold315_size338688	chr18	+	338688	219533	222843	29360087	28065152	28068498
scaffold129_size605804	chr18	+	605804	68456	71778	29360087	28065152	28068498
scaffold448_size226196	chr18	+	226196	69082	99412	29360087	18007417	29322880
scaffold39_size1053542	chr18_random	+	1053542	90985	95880	5170003	4326740	4331627
scaffold1499_size5912	chr18_random	+	5912	2970	4404	5170003	4572566	4574000
scaffold1546_size5367	chr18_random	+	5367	2425	3859	5170003	4572566	4574000
scaffold309_size341406	chr19	+	341406	80747	137713	24021853	1062861	1064421
scaffold426_size243431	chr19	+	243431	48835	217289	24021853	1070233	1511388
scaffold169_size519396	chr19	+	519396	34459	35052	24021853	1406062	1406667
scaffold133_size591675	chr19	+	591675	366069	366341	24021853	3398180	3398447
scaffold253_size390581	chr19	+	390581	327713	329776	24021853	3928144	3930110
scaffold89_size737138	chr19	+	737138	347267	348489	24021853	3929839	3931142
scaffold95_size706132	chr19	+	706132	496209	497435	24021853	3929839	11006246
scaffold1602_size4270	chr19	+	4270	3203	3564	24021853	5983680	5984041
scaffold28_size1211183	chr19	+	1211183	97632	523458	24021853	289403	20657493
scaffold459_size221187	chr19	+	221187	12562	14196	24021853	3928357	11007628
scaffold393_size271938	chr19	+	271938	103173	158430	24021853	6684471	8743827
scaffold13_size1475766	chr19	+	1475766	811617	1090396	24021853	3513974	9195628
scaffold1010_size24771	chr19	-	24771	9101	11050	24021853	9159419	9161400
scaffold55_size905835	chr19	+	905835	803203	805238	24021853	9835451	9837542
scaffold550_size162924	chr19	+	162924	151998	155218	24021853	11004605	11007841
scaffold36_size1071405	chr19	+	1071405	1026617	1034533	24021853	11045120	11053049
scaffold102_size677817	chr19	+	677817	402802	595888	24021853	12016494	14071657
scaffold50_size963328	chr19	+	963328	555766	557592	24021853	12485617	12487460
scaffold373_size281293	chr19	+	281293	121912	122510	24021853	7022105	22207166
scaffold87_size752611	chr19	+	752611	482189	622037	24021853	11006227	20659112
scaffold497_size197723	chr19	+	197723	165649	167946	24021853	11006227	20659112
scaffold402_size261414	chr19	+	261414	256825	257651	24021853	17553413	17554242
scaffold849_size47571	chr19	+	47571	45046	45317	24021853	17732225	17732496
scaffold891_size40067	chr19	+	40067	19232	19383	24021853	18443574	18443725
scaffold371_size285767	chr19	+	285767	275951	276437	24021853	18900339	18900825
scaffold478_size208472	chr19	+	208472	174718	176562	24021853	18900849	18902691
scaffold1523_size5678	chr19	+	5678	1765	3516	24021853	19971427	19973178
scaffold203_size463369	chr19	+	463369	1765	12785	24021853	19971427	22658780
scaffold134_size590630	chr19	+	590630	292010	417098	24021853	3929759	20659185
scaffold65_size853472	chr19	+	853472	23538	669158	24021853	12149669	21986417
scaffold281_size362804	chr19	+	362804	206186	208311	24021853	22929272	22931538
scaffold92_size718879	chr2	+	718879	404130	405055	18779844	407334	408281
scaffold332_size321420	chr2	+	321420	13593	14954	18779844	414082	415443
scaffold571_size149637	chr2	+	149637	1109	2470	18779844	414082	415443
scaffold96_size698077	chr2	+	698077	410951	423034	18779844	821352	15516747
scaffold581_size142983	chr2	+	142983	13458	13549	18779844	2723330	2723421
scaffold388_size273501	chr2	+	273501	154583	187427	18779844	721668	3021122
scaffold616_size128914	chr2	+	128914	84650	85223	18779844	3008112	3008688
scaffold261_size381946	chr2	+	381946	323404	325331	18779844	3148290	3150241
scaffold452_size225145	chr2	+	225145	66824	141411	18779844	3205587	4855211
scaffold383_size275080	chr2	+	275080	214808	218077	18779844	6309592	6311225
scaffold559_size158248	chr2	+	158248	50371	92809	18779844	6309592	11719462
scaffold1563_size5169	chr2	+	5169	1268	1348	18779844	7395640	7395725
scaffold858_size45924	chr2	+	45924	41206	41287	18779844	7395642	7395727
scaffold270_size371520	chr2	+	371520	212837	213051	18779844	8021693	8021907
scaffold233_size415906	chr2	+	415906	197683	199667	18779844	8207171	8209155
scaffold45_size1012159	chr2	+	1012159	518884	522119	18779844	8446911	8450145
scaffold773_size69822	chr2	+	69822	63903	65178	18779844	6581405	14695339
scaffold1_size1862935	chr2	+	1862935	930546	1282547	18779844	1472084	14583613
scaffold352_size303969	chr2	+	303969	132365	132500	18779844	17944804	17944929
scaffold687_size100329	chr2	+	100329	71767	71911	18779844	17944804	17944929
scaffold62_size859589	chr2	+	859589	53286	55397	18779844	17999981	18002046
scaffold250_size394352	chr2	+	394352	118822	382178	18779844	718423	18717039
scaffold360_size294240	chr2	+	294240	22425	30958	18779844	18714706	18717039
scaffold12_size1484567	chr2	+	1484567	1111688	1122061	18779844	18714566	18717408
scaffold148_size560834	chr2	+	560834	334602	384842	18779844	18714566	18717414
scaffold88_size749664	chr2	+	749664	704594	707209	18779844	18714566	18717414
scaffold130_size602244	chr2	+	602244	401711	488147	18779844	18714566	18717414
scaffold9_size1555044	chr2	+	1555044	466703	477266	18779844	18714609	18717408
scaffold59_size887255	chr3	+	887255	866266	869079	19341862	13971	16791
scaffold789_size64529	chr3	+	64529	58526	61339	19341862	13971	16791
scaffold1528_size5622	chr3	+	5622	3141	3214	19341862	1311552	1311625
scaffold528_size179813	chr3	+	179813	94370	94507	19341862	1802970	1803107
scaffold105_size659173	chr3	+	659173	63092	65364	19341862	2388223	2390507
scaffold1293_size9539	chr3	-	9539	3603	4427	19341862	2906340	2907157
scaffold728_size87572	chr3	+	87572	43897	44990	19341862	3001159	3002252
scaffold279_size365527	chr3	+	365527	24821	245871	19341862	3162670	7523162
scaffold797_size62438	chr3	+	62438	31721	52896	19341862	3163554	6922826
scaffold1250_size10749	chr3	+	10749	101	290	19341862	3343883	3344147
scaffold862_size45560	chr3	+	45560	42700	43015	19341862	3876815	3877133
scaffold125_size608205	chr3	+	608205	322739	324838	19341862	4553976	4556044
scaffold268_size372821	chr3	+	372821	344207	351387	19341862	5370779	5377951
scaffold167_size520804	chr3	+	520804	231395	455674	19341862	5667657	11000834
scaffold328_size323540	chr3	+	323540	224335	293551	19341862	4223296	11121393
scaffold324_size324465	chr3	+	324465	98259	225273	19341862	1425405	18273920
scaffold734_size82491	chr3	+	82491	62243	70694	19341862	6805279	7526033
scaffold742_size80456	chr3	+	80456	76356	76425	19341862	7324355	7324424
scaffold999_size25422	chr3	+	25422	17275	17354	19341862	7525956	7531223
scaffold1239_size10982	chr3	+	10982	7	73	19341862	7527616	7531223
scaffold685_size102961	chr3	+	102961	47895	48444	19341862	8413656	8414206
scaffold385_size274724	chr3	+	274724	92987	94281	19341862	8012301	18273920
scaffold94_size713812	chr3	+	713812	200837	468254	19341862	778444	12500625
scaffold796_size62676	chr3	+	62676	1838	2098	19341862	11121139	11121393
scaffold1450_size6616	chr3	-	6616	4518	4778	19341862	11121139	11121393
scaffold222_size435352	chr3	+	435352	64507	66416	19341862	11769545	11771492
scaffold855_size46386	chr3	+	46386	8705	9034	19341862	12950723	12951052
scaffold760_size73572	chr3	+	73572	68851	70106	19341862	17994636	17995894
scaffold254_size388685	chr4	+	388685	274940	275047	23867706	107475	107582
scaffold139_size577731	chr4	+	577731	331999	334007	23867706	611762	613870
scaffold93_size714796	chr4	+	714796	287379	290713	23867706	611762	615192
scaffold584_size141760	chr4	+	141760	102946	106291	23867706	611762	615192
scaffold142_size574908	None	+	574908	na	na	na	na	na
scaffold156_size543371	None	+	543371	na	na	na	na	na
scaffold164_size528297	None	+	528297	na	na	na	na	na
scaffold166_size521459	None	+	521459	na	na	na	na	na
scaffold194_size468989	None	+	468989	na	na	na	na	na
scaffold199_size465929	None	+	465929	na	na	na	na	na
scaffold204_size461939	None	+	461939	na	na	na	na	na
scaffold238_size410540	None	+	410540	na	na	na	na	na
scaffold239_size408147	None	+	408147	na	na	na	na	na
scaffold258_size385168	None	+	385168	na	na	na	na	na
scaffold263_size379573	None	+	379573	na	na	na	na	na
scaffold267_size373412	None	+	373412	na	na	na	na	na
scaffold294_size351170	None	+	351170	na	na	na	na	na
scaffold295_size350362	None	+	350362	na	na	na	na	na
scaffold301_size346720	None	+	346720	na	na	na	na	na
scaffold303_size344171	None	+	344171	na	na	na	na	na
scaffold312_size339379	None	+	339379	na	na	na	na	na
scaffold329_size323464	None	+	323464	na	na	na	na	na
scaffold353_size303223	None	+	303223	na	na	na	na	na
scaffold356_size297566	None	+	297566	na	na	na	na	na
scaffold364_size288414	None	+	288414	na	na	na	na	na
scaffold365_size288368	None	+	288368	na	na	na	na	na
scaffold380_size276706	None	+	276706	na	na	na	na	na
scaffold394_size268910	None	+	268910	na	na	na	na	na
scaffold399_size263046	None	+	263046	na	na	na	na	na
scaffold409_size254044	None	+	254044	na	na	na	na	na
scaffold410_size252252	None	+	252252	na	na	na	na	na
scaffold422_size246560	None	+	246560	na	na	na	na	na
scaffold429_size240638	None	+	240638	na	na	na	na	na
scaffold430_size239863	None	+	239863	na	na	na	na	na
scaffold431_size238522	None	+	238522	na	na	na	na	na
scaffold433_size237148	None	+	237148	na	na	na	na	na
scaffold439_size236221	None	+	236221	na	na	na	na	na
scaffold445_size228148	None	+	228148	na	na	na	na	na
scaffold456_size221644	None	+	221644	na	na	na	na	na
scaffold462_size217632	None	+	217632	na	na	na	na	na
scaffold465_size216503	None	+	216503	na	na	na	na	na
scaffold467_size213297	None	+	213297	na	na	na	na	na
scaffold469_size213041	None	+	213041	na	na	na	na	na
scaffold472_size211008	None	+	211008	na	na	na	na	na
scaffold474_size210406	None	+	210406	na	na	na	na	na
scaffold481_size205178	None	+	205178	na	na	na	na	na
scaffold484_size203314	None	+	203314	na	na	na	na	na
scaffold485_size203089	None	+	203089	na	na	na	na	na
scaffold487_size202209	None	+	202209	na	na	na	na	na
scaffold489_size201961	None	+	201961	na	na	na	na	na
scaffold490_size201484	None	+	201484	na	na	na	na	na
scaffold495_size198985	None	+	198985	na	na	na	na	na
scaffold501_size196671	None	+	196671	na	na	na	na	na
scaffold503_size196565	None	+	196565	na	na	na	na	na
scaffold504_size193966	None	+	193966	na	na	na	na	na
scaffold505_size193468	None	+	193468	na	na	na	na	na
scaffold507_size192914	None	+	192914	na	na	na	na	na
scaffold508_size190849	None	+	190849	na	na	na	na	na
scaffold511_size188204	None	+	188204	na	na	na	na	na
scaffold512_size187211	None	+	187211	na	na	na	na	na
scaffold513_size186705	None	+	186705	na	na	na	na	na
scaffold517_size186048	None	+	186048	na	na	na	na	na
scaffold521_size184735	None	+	184735	na	na	na	na	na
scaffold533_size178161	None	+	178161	na	na	na	na	na
scaffold534_size177025	None	+	177025	na	na	na	na	na
scaffold535_size176836	None	+	176836	na	na	na	na	na
scaffold538_size173939	None	+	173939	na	na	na	na	na
scaffold540_size172311	None	+	172311	na	na	na	na	na
scaffold542_size172077	None	+	172077	na	na	na	na	na
scaffold545_size168148	None	+	168148	na	na	na	na	na
scaffold547_size167002	None	+	167002	na	na	na	na	na
scaffold556_size159941	None	+	159941	na	na	na	na	na
scaffold557_size158656	None	+	158656	na	na	na	na	na
scaffold560_size156814	None	+	156814	na	na	na	na	na
scaffold561_size156615	None	+	156615	na	na	na	na	na
scaffold563_size154924	None	+	154924	na	na	na	na	na
scaffold564_size154702	None	+	154702	na	na	na	na	na
scaffold568_size151327	None	+	151327	na	na	na	na	na
scaffold575_size147595	None	+	147595	na	na	na	na	na
scaffold583_size141823	None	+	141823	na	na	na	na	na
scaffold586_size141285	None	+	141285	na	na	na	na	na
scaffold591_size139029	None	+	139029	na	na	na	na	na
scaffold593_size138782	None	+	138782	na	na	na	na	na
scaffold604_size133642	None	+	133642	na	na	na	na	na
scaffold607_size133233	None	+	133233	na	na	na	na	na
scaffold610_size132475	None	+	132475	na	na	na	na	na
scaffold612_size132011	None	+	132011	na	na	na	na	na
scaffold617_size128661	None	+	128661	na	na	na	na	na
scaffold618_size128606	None	+	128606	na	na	na	na	na
scaffold619_size128345	None	+	128345	na	na	na	na	na
scaffold620_size128314	None	+	128314	na	na	na	na	na
scaffold621_size128310	None	+	128310	na	na	na	na	na
scaffold624_size127768	None	+	127768	na	na	na	na	na
scaffold625_size127502	None	+	127502	na	na	na	na	na
scaffold626_size127221	None	+	127221	na	na	na	na	na
scaffold627_size127100	None	+	127100	na	na	na	na	na
scaffold630_size126236	None	+	126236	na	na	na	na	na
scaffold632_size124595	None	+	124595	na	na	na	na	na
scaffold633_size124080	None	+	124080	na	na	na	na	na
scaffold634_size124079	None	+	124079	na	na	na	na	na
scaffold636_size123790	None	+	123790	na	na	na	na	na
scaffold638_size123451	None	+	123451	na	na	na	na	na
scaffold639_size122514	None	+	122514	na	na	na	na	na
scaffold644_size119944	None	+	119944	na	na	na	na	na
scaffold645_size119521	None	+	119521	na	na	na	na	na
scaffold648_size118734	None	+	118734	na	na	na	na	na
scaffold652_size116608	None	+	116608	na	na	na	na	na
scaffold653_size116565	None	+	116565	na	na	na	na	na
scaffold654_size116285	None	+	116285	na	na	na	na	na
scaffold655_size115805	None	+	115805	na	na	na	na	na
scaffold658_size114973	None	+	114973	na	na	na	na	na
scaffold660_size113795	None	+	113795	na	na	na	na	na
scaffold661_size113655	None	+	113655	na	na	na	na	na
scaffold662_size112683	None	+	112683	na	na	na	na	na
scaffold665_size111511	None	+	111511	na	na	na	na	na
scaffold666_size111503	None	+	111503	na	na	na	na	na
scaffold674_size109299	None	+	109299	na	na	na	na	na
scaffold676_size108253	None	+	108253	na	na	na	na	na
scaffold677_size107734	None	+	107734	na	na	na	na	na
scaffold679_size106169	None	+	106169	na	na	na	na	na
scaffold680_size105388	None	+	105388	na	na	na	na	na
scaffold681_size104346	None	+	104346	na	na	na	na	na
scaffold682_size104136	None	+	104136	na	na	na	na	na
scaffold683_size103566	None	+	103566	na	na	na	na	na
scaffold688_size100103	None	+	100103	na	na	na	na	na
scaffold692_size98101	None	+	98101	na	na	na	na	na
scaffold693_size97963	None	+	97963	na	na	na	na	na
scaffold694_size97836	None	+	97836	na	na	na	na	na
scaffold696_size97625	None	+	97625	na	na	na	na	na
scaffold697_size97550	None	+	97550	na	na	na	na	na
scaffold701_size95458	None	+	95458	na	na	na	na	na
scaffold702_size95231	None	+	95231	na	na	na	na	na
scaffold703_size94923	None	+	94923	na	na	na	na	na
scaffold707_size94148	None	+	94148	na	na	na	na	na
scaffold708_size93858	None	+	93858	na	na	na	na	na
scaffold709_size93466	None	+	93466	na	na	na	na	na
scaffold710_size92978	None	+	92978	na	na	na	na	na
scaffold713_size91867	None	+	91867	na	na	na	na	na
scaffold714_size91440	None	+	91440	na	na	na	na	na
scaffold715_size91413	None	+	91413	na	na	na	na	na
scaffold721_size90222	None	+	90222	na	na	na	na	na
scaffold722_size90167	None	+	90167	na	na	na	na	na
scaffold725_size88532	None	+	88532	na	na	na	na	na
scaffold727_size87636	None	+	87636	na	na	na	na	na
scaffold730_size86902	None	+	86902	na	na	na	na	na
scaffold731_size85304	None	+	85304	na	na	na	na	na
scaffold733_size83835	None	+	83835	na	na	na	na	na
scaffold736_size81958	None	+	81958	na	na	na	na	na
scaffold737_size81492	None	+	81492	na	na	na	na	na
scaffold738_size81203	None	+	81203	na	na	na	na	na
scaffold739_size81091	None	+	81091	na	na	na	na	na
scaffold741_size80477	None	+	80477	na	na	na	na	na
scaffold743_size79864	None	+	79864	na	na	na	na	na
scaffold747_size78364	None	+	78364	na	na	na	na	na
scaffold748_size78166	None	+	78166	na	na	na	na	na
scaffold749_size78080	None	+	78080	na	na	na	na	na
scaffold750_size77980	None	+	77980	na	na	na	na	na
scaffold751_size77657	None	+	77657	na	na	na	na	na
scaffold755_size76505	None	+	76505	na	na	na	na	na
scaffold756_size75642	None	+	75642	na	na	na	na	na
scaffold758_size75365	None	+	75365	na	na	na	na	na
scaffold759_size74576	None	+	74576	na	na	na	na	na
scaffold762_size73340	None	+	73340	na	na	na	na	na
scaffold766_size71686	None	+	71686	na	na	na	na	na
scaffold767_size71480	None	+	71480	na	na	na	na	na
scaffold769_size71344	None	+	71344	na	na	na	na	na
scaffold770_size71031	None	+	71031	na	na	na	na	na
scaffold771_size70994	None	+	70994	na	na	na	na	na
scaffold774_size69362	None	+	69362	na	na	na	na	na
scaffold775_size68853	None	+	68853	na	na	na	na	na
scaffold776_size68812	None	+	68812	na	na	na	na	na
scaffold777_size68218	None	+	68218	na	na	na	na	na
scaffold779_size67710	None	+	67710	na	na	na	na	na
scaffold782_size66320	None	+	66320	na	na	na	na	na
scaffold783_size65617	None	+	65617	na	na	na	na	na
scaffold784_size65385	None	+	65385	na	na	na	na	na
scaffold785_size65379	None	+	65379	na	na	na	na	na
scaffold786_size65005	None	+	65005	na	na	na	na	na
scaffold790_size64319	None	+	64319	na	na	na	na	na
scaffold791_size64248	None	+	64248	na	na	na	na	na
scaffold792_size63823	None	+	63823	na	na	na	na	na
scaffold793_size63454	None	+	63454	na	na	na	na	na
scaffold794_size63128	None	+	63128	na	na	na	na	na
scaffold795_size62889	None	+	62889	na	na	na	na	na
scaffold800_size61662	None	+	61662	na	na	na	na	na
scaffold802_size60760	None	+	60760	na	na	na	na	na
scaffold803_size60720	None	+	60720	na	na	na	na	na
scaffold804_size60364	None	+	60364	na	na	na	na	na
scaffold805_size60286	None	+	60286	na	na	na	na	na
scaffold806_size59925	None	+	59925	na	na	na	na	na
scaffold808_size58761	None	+	58761	na	na	na	na	na
scaffold809_size58674	None	+	58674	na	na	na	na	na
scaffold812_size57780	None	+	57780	na	na	na	na	na
scaffold813_size57398	None	+	57398	na	na	na	na	na
scaffold814_size57385	None	+	57385	na	na	na	na	na
scaffold817_size56666	None	+	56666	na	na	na	na	na
scaffold820_size56079	None	+	56079	na	na	na	na	na
scaffold821_size55444	None	+	55444	na	na	na	na	na
scaffold822_size54770	None	+	54770	na	na	na	na	na
scaffold824_size54541	None	+	54541	na	na	na	na	na
scaffold825_size54338	None	+	54338	na	na	na	na	na
scaffold826_size54165	None	+	54165	na	na	na	na	na
scaffold827_size53893	None	+	53893	na	na	na	na	na
scaffold828_size53878	None	+	53878	na	na	na	na	na
scaffold829_size53678	None	+	53678	na	na	na	na	na
scaffold830_size53621	None	+	53621	na	na	na	na	na
scaffold831_size52652	None	+	52652	na	na	na	na	na
scaffold832_size52502	None	+	52502	na	na	na	na	na
scaffold834_size52220	None	+	52220	na	na	na	na	na
scaffold837_size51679	None	+	51679	na	na	na	na	na
scaffold838_size51646	None	+	51646	na	na	na	na	na
scaffold839_size50828	None	+	50828	na	na	na	na	na
scaffold842_size49797	None	+	49797	na	na	na	na	na
scaffold843_size49361	None	+	49361	na	na	na	na	na
scaffold844_size49053	None	+	49053	na	na	na	na	na
scaffold845_size48912	None	+	48912	na	na	na	na	na
scaffold846_size48087	None	+	48087	na	na	na	na	na
scaffold847_size47669	None	+	47669	na	na	na	na	na
scaffold848_size47649	None	+	47649	na	na	na	na	na
scaffold851_size47108	None	+	47108	na	na	na	na	na
scaffold852_size47091	None	+	47091	na	na	na	na	na
scaffold854_size46396	None	+	46396	na	na	na	na	na
scaffold857_size46234	None	+	46234	na	na	na	na	na
scaffold859_size45766	None	+	45766	na	na	na	na	na
scaffold860_size45686	None	+	45686	na	na	na	na	na
scaffold861_size45613	None	+	45613	na	na	na	na	na
scaffold863_size45424	None	+	45424	na	na	na	na	na
scaffold864_size45220	None	+	45220	na	na	na	na	na
scaffold866_size44941	None	+	44941	na	na	na	na	na
scaffold867_size44793	None	+	44793	na	na	na	na	na
scaffold868_size44554	None	+	44554	na	na	na	na	na
scaffold869_size44510	None	+	44510	na	na	na	na	na
scaffold870_size44295	None	+	44295	na	na	na	na	na
scaffold871_size43955	None	+	43955	na	na	na	na	na
scaffold872_size43666	None	+	43666	na	na	na	na	na
scaffold873_size43579	None	+	43579	na	na	na	na	na
scaffold874_size43416	None	+	43416	na	na	na	na	na
scaffold877_size42937	None	+	42937	na	na	na	na	na
scaffold880_size42587	None	+	42587	na	na	na	na	na
scaffold881_size42520	None	+	42520	na	na	na	na	na
scaffold882_size42275	None	+	42275	na	na	na	na	na
scaffold883_size41640	None	+	41640	na	na	na	na	na
scaffold884_size41633	None	+	41633	na	na	na	na	na
scaffold885_size41222	None	+	41222	na	na	na	na	na
scaffold886_size41218	None	+	41218	na	na	na	na	na
scaffold888_size40586	None	+	40586	na	na	na	na	na
scaffold889_size40203	None	+	40203	na	na	na	na	na
scaffold890_size40149	None	+	40149	na	na	na	na	na
scaffold894_size39349	None	+	39349	na	na	na	na	na
scaffold895_size39214	None	+	39214	na	na	na	na	na
scaffold896_size38970	None	+	38970	na	na	na	na	na
scaffold897_size38969	None	+	38969	na	na	na	na	na
scaffold898_size38958	None	+	38958	na	na	na	na	na
scaffold899_size37830	None	+	37830	na	na	na	na	na
scaffold903_size37564	None	+	37564	na	na	na	na	na
scaffold905_size37019	None	+	37019	na	na	na	na	na
scaffold907_size36840	None	+	36840	na	na	na	na	na
scaffold908_size36787	None	+	36787	na	na	na	na	na
scaffold910_size36566	None	+	36566	na	na	na	na	na
scaffold911_size36418	None	+	36418	na	na	na	na	na
scaffold912_size36338	None	+	36338	na	na	na	na	na
scaffold913_size36170	None	+	36170	na	na	na	na	na
scaffold914_size35904	None	+	35904	na	na	na	na	na
scaffold915_size35427	None	+	35427	na	na	na	na	na
scaffold916_size35026	None	+	35026	na	na	na	na	na
scaffold917_size34847	None	+	34847	na	na	na	na	na
scaffold920_size34415	None	+	34415	na	na	na	na	na
scaffold922_size34272	None	+	34272	na	na	na	na	na
scaffold923_size34232	None	+	34232	na	na	na	na	na
scaffold924_size33884	None	+	33884	na	na	na	na	na
scaffold925_size33834	None	+	33834	na	na	na	na	na
scaffold926_size33732	None	+	33732	na	na	na	na	na
scaffold927_size33562	None	+	33562	na	na	na	na	na
scaffold929_size32888	None	+	32888	na	na	na	na	na
scaffold931_size32507	None	+	32507	na	na	na	na	na
scaffold932_size32227	None	+	32227	na	na	na	na	na
scaffold933_size32127	None	+	32127	na	na	na	na	na
scaffold935_size31967	None	+	31967	na	na	na	na	na
scaffold936_size31872	None	+	31872	na	na	na	na	na
scaffold938_size31207	None	+	31207	na	na	na	na	na
scaffold939_size31099	None	+	31099	na	na	na	na	na
scaffold941_size30928	None	+	30928	na	na	na	na	na
scaffold942_size30811	None	+	30811	na	na	na	na	na
scaffold943_size30680	None	+	30680	na	na	na	na	na
scaffold944_size30549	None	+	30549	na	na	na	na	na
scaffold945_size30406	None	+	30406	na	na	na	na	na
scaffold946_size30262	None	+	30262	na	na	na	na	na
scaffold947_size30245	None	+	30245	na	na	na	na	na
scaffold948_size30146	None	+	30146	na	na	na	na	na
scaffold950_size30049	None	+	30049	na	na	na	na	na
scaffold952_size29999	None	+	29999	na	na	na	na	na
scaffold953_size29972	None	+	29972	na	na	na	na	na
scaffold955_size29548	None	+	29548	na	na	na	na	na
scaffold956_size29173	None	+	29173	na	na	na	na	na
scaffold958_size29003	None	+	29003	na	na	na	na	na
scaffold959_size28777	None	+	28777	na	na	na	na	na
scaffold961_size28710	None	+	28710	na	na	na	na	na
scaffold962_size28542	None	+	28542	na	na	na	na	na
scaffold963_size28341	None	+	28341	na	na	na	na	na
scaffold964_size28131	None	+	28131	na	na	na	na	na
scaffold965_size28123	None	+	28123	na	na	na	na	na
scaffold966_size28107	None	+	28107	na	na	na	na	na
scaffold967_size28068	None	+	28068	na	na	na	na	na
scaffold968_size27992	None	+	27992	na	na	na	na	na
scaffold969_size27970	None	+	27970	na	na	na	na	na
scaffold971_size27813	None	+	27813	na	na	na	na	na
scaffold972_size27793	None	+	27793	na	na	na	na	na
scaffold973_size27450	None	+	27450	na	na	na	na	na
scaffold974_size27438	None	+	27438	na	na	na	na	na
scaffold975_size27401	None	+	27401	na	na	na	na	na
scaffold977_size27050	None	+	27050	na	na	na	na	na
scaffold978_size26980	None	+	26980	na	na	na	na	na
scaffold979_size26792	None	+	26792	na	na	na	na	na
scaffold980_size26778	None	+	26778	na	na	na	na	na
scaffold981_size26757	None	+	26757	na	na	na	na	na
scaffold982_size26748	None	+	26748	na	na	na	na	na
scaffold983_size26740	None	+	26740	na	na	na	na	na
scaffold984_size26647	None	+	26647	na	na	na	na	na
scaffold985_size26605	None	+	26605	na	na	na	na	na
scaffold987_size26497	None	+	26497	na	na	na	na	na
scaffold988_size26493	None	+	26493	na	na	na	na	na
scaffold989_size26411	None	+	26411	na	na	na	na	na
scaffold991_size26200	None	+	26200	na	na	na	na	na
scaffold993_size26001	None	+	26001	na	na	na	na	na
scaffold994_size25964	None	+	25964	na	na	na	na	na
scaffold995_size25810	None	+	25810	na	na	na	na	na
scaffold996_size25677	None	+	25677	na	na	na	na	na
scaffold997_size25677	None	+	25677	na	na	na	na	na
scaffold998_size25529	None	+	25529	na	na	na	na	na
scaffold1000_size25310	None	+	25310	na	na	na	na	na
scaffold1001_size25237	None	+	25237	na	na	na	na	na
scaffold1003_size25156	None	+	25156	na	na	na	na	na
scaffold1005_size24999	None	+	24999	na	na	na	na	na
scaffold1006_size24908	None	+	24908	na	na	na	na	na
scaffold1007_size24833	None	+	24833	na	na	na	na	na
scaffold1009_size24788	None	+	24788	na	na	na	na	na
scaffold1011_size24759	None	+	24759	na	na	na	na	na
scaffold1012_size24664	None	+	24664	na	na	na	na	na
scaffold1013_size24420	None	+	24420	na	na	na	na	na
scaffold1014_size24417	None	+	24417	na	na	na	na	na
scaffold1015_size24410	None	+	24410	na	na	na	na	na
scaffold1016_size24194	None	+	24194	na	na	na	na	na
scaffold1017_size24084	None	+	24084	na	na	na	na	na
scaffold1018_size24047	None	+	24047	na	na	na	na	na
scaffold1020_size23896	None	+	23896	na	na	na	na	na
scaffold1021_size23839	None	+	23839	na	na	na	na	na
scaffold1022_size23813	None	+	23813	na	na	na	na	na
scaffold1023_size23732	None	+	23732	na	na	na	na	na
scaffold1024_size23622	None	+	23622	na	na	na	na	na
scaffold1025_size23620	None	+	23620	na	na	na	na	na
scaffold1026_size23606	None	+	23606	na	na	na	na	na
scaffold1027_size23586	None	+	23586	na	na	na	na	na
scaffold1028_size23508	None	+	23508	na	na	na	na	na
scaffold1030_size23415	None	+	23415	na	na	na	na	na
scaffold1031_size23289	None	+	23289	na	na	na	na	na
scaffold1032_size23090	None	+	23090	na	na	na	na	na
scaffold1033_size23071	None	+	23071	na	na	na	na	na
scaffold1034_size22948	None	+	22948	na	na	na	na	na
scaffold1036_size22764	None	+	22764	na	na	na	na	na
scaffold1039_size21856	None	+	21856	na	na	na	na	na
scaffold1040_size21852	None	+	21852	na	na	na	na	na
scaffold1041_size21800	None	+	21800	na	na	na	na	na
scaffold1042_size21777	None	+	21777	na	na	na	na	na
scaffold1043_size21697	None	+	21697	na	na	na	na	na
scaffold1044_size21641	None	+	21641	na	na	na	na	na
scaffold1045_size21638	None	+	21638	na	na	na	na	na
scaffold1047_size21624	None	+	21624	na	na	na	na	na
scaffold1048_size21377	None	+	21377	na	na	na	na	na
scaffold1049_size21338	None	+	21338	na	na	na	na	na
scaffold1051_size21287	None	+	21287	na	na	na	na	na
scaffold1053_size21173	None	+	21173	na	na	na	na	na
scaffold1055_size21087	None	+	21087	na	na	na	na	na
scaffold1056_size21079	None	+	21079	na	na	na	na	na
scaffold1057_size21027	None	+	21027	na	na	na	na	na
scaffold1058_size21009	None	+	21009	na	na	na	na	na
scaffold1059_size20906	None	+	20906	na	na	na	na	na
scaffold1060_size20828	None	+	20828	na	na	na	na	na
scaffold1061_size20708	None	+	20708	na	na	na	na	na
scaffold1062_size20698	None	+	20698	na	na	na	na	na
scaffold1063_size20688	None	+	20688	na	na	na	na	na
scaffold1065_size20386	None	+	20386	na	na	na	na	na
scaffold1066_size20206	None	+	20206	na	na	na	na	na
scaffold1067_size19649	None	+	19649	na	na	na	na	na
scaffold1068_size19638	None	+	19638	na	na	na	na	na
scaffold1069_size19513	None	+	19513	na	na	na	na	na
scaffold1070_size19467	None	+	19467	na	na	na	na	na
scaffold1071_size19467	None	+	19467	na	na	na	na	na
scaffold1072_size19431	None	+	19431	na	na	na	na	na
scaffold1074_size19298	None	+	19298	na	na	na	na	na
scaffold1075_size19277	None	+	19277	na	na	na	na	na
scaffold1077_size19203	None	+	19203	na	na	na	na	na
scaffold1078_size19161	None	+	19161	na	na	na	na	na
scaffold1079_size19013	None	+	19013	na	na	na	na	na
scaffold1080_size18956	None	+	18956	na	na	na	na	na
scaffold1081_size18940	None	+	18940	na	na	na	na	na
scaffold1082_size18923	None	+	18923	na	na	na	na	na
scaffold1084_size18896	None	+	18896	na	na	na	na	na
scaffold1085_size18595	None	+	18595	na	na	na	na	na
scaffold1086_size18182	None	+	18182	na	na	na	na	na
scaffold1087_size18152	None	+	18152	na	na	na	na	na
scaffold1089_size18110	None	+	18110	na	na	na	na	na
scaffold1090_size17948	None	+	17948	na	na	na	na	na
scaffold1091_size17896	None	+	17896	na	na	na	na	na
scaffold1092_size17866	None	+	17866	na	na	na	na	na
scaffold1093_size17851	None	+	17851	na	na	na	na	na
scaffold1094_size17834	None	+	17834	na	na	na	na	na
scaffold1095_size17812	None	+	17812	na	na	na	na	na
scaffold1096_size17718	None	+	17718	na	na	na	na	na
scaffold1097_size17658	None	+	17658	na	na	na	na	na
scaffold1099_size17546	None	+	17546	na	na	na	na	na
scaffold1100_size17457	None	+	17457	na	na	na	na	na
scaffold1101_size17343	None	+	17343	na	na	na	na	na
scaffold1102_size17337	None	+	17337	na	na	na	na	na
scaffold1103_size17218	None	+	17218	na	na	na	na	na
scaffold1104_size17142	None	+	17142	na	na	na	na	na
scaffold1105_size17072	None	+	17072	na	na	na	na	na
scaffold1106_size16974	None	+	16974	na	na	na	na	na
scaffold1107_size16955	None	+	16955	na	na	na	na	na
scaffold1108_size16952	None	+	16952	na	na	na	na	na
scaffold1109_size16905	None	+	16905	na	na	na	na	na
scaffold1111_size16767	None	+	16767	na	na	na	na	na
scaffold1112_size16760	None	+	16760	na	na	na	na	na
scaffold1114_size16698	None	+	16698	na	na	na	na	na
scaffold1115_size16693	None	+	16693	na	na	na	na	na
scaffold1116_size16635	None	+	16635	na	na	na	na	na
scaffold1117_size16596	None	+	16596	na	na	na	na	na
scaffold1120_size16532	None	+	16532	na	na	na	na	na
scaffold1121_size16516	None	+	16516	na	na	na	na	na
scaffold1122_size16511	None	+	16511	na	na	na	na	na
scaffold1124_size16449	None	+	16449	na	na	na	na	na
scaffold1128_size16281	None	+	16281	na	na	na	na	na
scaffold1131_size16070	None	+	16070	na	na	na	na	na
scaffold1133_size15929	None	+	15929	na	na	na	na	na
scaffold1134_size15918	None	+	15918	na	na	na	na	na
scaffold1135_size15809	None	+	15809	na	na	na	na	na
scaffold1136_size15778	None	+	15778	na	na	na	na	na
scaffold1137_size15769	None	+	15769	na	na	na	na	na
scaffold1138_size15732	None	+	15732	na	na	na	na	na
scaffold1140_size15692	None	+	15692	na	na	na	na	na
scaffold1141_size15467	None	+	15467	na	na	na	na	na
scaffold1143_size15444	None	+	15444	na	na	na	na	na
scaffold1144_size15427	None	+	15427	na	na	na	na	na
scaffold1146_size15362	None	+	15362	na	na	na	na	na
scaffold1147_size15341	None	+	15341	na	na	na	na	na
scaffold1148_size15320	None	+	15320	na	na	na	na	na
scaffold1149_size15309	None	+	15309	na	na	na	na	na
scaffold1150_size15268	None	+	15268	na	na	na	na	na
scaffold1151_size15230	None	+	15230	na	na	na	na	na
scaffold1152_size15161	None	+	15161	na	na	na	na	na
scaffold1153_size15141	None	+	15141	na	na	na	na	na
scaffold1154_size15058	None	+	15058	na	na	na	na	na
scaffold1155_size15020	None	+	15020	na	na	na	na	na
scaffold1156_size14945	None	+	14945	na	na	na	na	na
scaffold1157_size14928	None	+	14928	na	na	na	na	na
scaffold1158_size14884	None	+	14884	na	na	na	na	na
scaffold1159_size14876	None	+	14876	na	na	na	na	na
scaffold1160_size14867	None	+	14867	na	na	na	na	na
scaffold1161_size14844	None	+	14844	na	na	na	na	na
scaffold1163_size14748	None	+	14748	na	na	na	na	na
scaffold1164_size14719	None	+	14719	na	na	na	na	na
scaffold1165_size14718	None	+	14718	na	na	na	na	na
scaffold1166_size14656	None	+	14656	na	na	na	na	na
scaffold1167_size14652	None	+	14652	na	na	na	na	na
scaffold1168_size14613	None	+	14613	na	na	na	na	na
scaffold1169_size14550	None	+	14550	na	na	na	na	na
scaffold1170_size14543	None	+	14543	na	na	na	na	na
scaffold1171_size14427	None	+	14427	na	na	na	na	na
scaffold1172_size14410	None	+	14410	na	na	na	na	na
scaffold1173_size14360	None	+	14360	na	na	na	na	na
scaffold1176_size14172	None	+	14172	na	na	na	na	na
scaffold1177_size14133	None	+	14133	na	na	na	na	na
scaffold1178_size13989	None	+	13989	na	na	na	na	na
scaffold1180_size13820	None	+	13820	na	na	na	na	na
scaffold1181_size13665	None	+	13665	na	na	na	na	na
scaffold1182_size13653	None	+	13653	na	na	na	na	na
scaffold1183_size13588	None	+	13588	na	na	na	na	na
scaffold1184_size13579	None	+	13579	na	na	na	na	na
scaffold1185_size13504	None	+	13504	na	na	na	na	na
scaffold1186_size13503	None	+	13503	na	na	na	na	na
scaffold1189_size13384	None	+	13384	na	na	na	na	na
scaffold1190_size13382	None	+	13382	na	na	na	na	na
scaffold1191_size13242	None	+	13242	na	na	na	na	na
scaffold1192_size13234	None	+	13234	na	na	na	na	na
scaffold1193_size13189	None	+	13189	na	na	na	na	na
scaffold1194_size13167	None	+	13167	na	na	na	na	na
scaffold1195_size13126	None	+	13126	na	na	na	na	na
scaffold1196_size13094	None	+	13094	na	na	na	na	na
scaffold1197_size12925	None	+	12925	na	na	na	na	na
scaffold1198_size12897	None	+	12897	na	na	na	na	na
scaffold1199_size12896	None	+	12896	na	na	na	na	na
scaffold1200_size12864	None	+	12864	na	na	na	na	na
scaffold1201_size12832	None	+	12832	na	na	na	na	na
scaffold1202_size12764	None	+	12764	na	na	na	na	na
scaffold1203_size12743	None	+	12743	na	na	na	na	na
scaffold1204_size12544	None	+	12544	na	na	na	na	na
scaffold1206_size12357	None	+	12357	na	na	na	na	na
scaffold1207_size12337	None	+	12337	na	na	na	na	na
scaffold1208_size12265	None	+	12265	na	na	na	na	na
scaffold1209_size12254	None	+	12254	na	na	na	na	na
scaffold1211_size12083	None	+	12083	na	na	na	na	na
scaffold1212_size12016	None	+	12016	na	na	na	na	na
scaffold1213_size11978	None	+	11978	na	na	na	na	na
scaffold1214_size11807	None	+	11807	na	na	na	na	na
scaffold1215_size11792	None	+	11792	na	na	na	na	na
scaffold1216_size11741	None	+	11741	na	na	na	na	na
scaffold1217_size11707	None	+	11707	na	na	na	na	na
scaffold1218_size11661	None	+	11661	na	na	na	na	na
scaffold1219_size11640	None	+	11640	na	na	na	na	na
scaffold1220_size11610	None	+	11610	na	na	na	na	na
scaffold1221_size11558	None	+	11558	na	na	na	na	na
scaffold1222_size11527	None	+	11527	na	na	na	na	na
scaffold1223_size11515	None	+	11515	na	na	na	na	na
scaffold1224_size11503	None	+	11503	na	na	na	na	na
scaffold1225_size11489	None	+	11489	na	na	na	na	na
scaffold1226_size11374	None	+	11374	na	na	na	na	na
scaffold1227_size11362	None	+	11362	na	na	na	na	na
scaffold1228_size11349	None	+	11349	na	na	na	na	na
scaffold1229_size11336	None	+	11336	na	na	na	na	na
scaffold1230_size11310	None	+	11310	na	na	na	na	na
scaffold1231_size11281	None	+	11281	na	na	na	na	na
scaffold1232_size11202	None	+	11202	na	na	na	na	na
scaffold1235_size11157	None	+	11157	na	na	na	na	na
scaffold1236_size11137	None	+	11137	na	na	na	na	na
scaffold1237_size10999	None	+	10999	na	na	na	na	na
scaffold1241_size10950	None	+	10950	na	na	na	na	na
scaffold1242_size10933	None	+	10933	na	na	na	na	na
scaffold1243_size10883	None	+	10883	na	na	na	na	na
scaffold1244_size10876	None	+	10876	na	na	na	na	na
scaffold1245_size10869	None	+	10869	na	na	na	na	na
scaffold1246_size10845	None	+	10845	na	na	na	na	na
scaffold1247_size10794	None	+	10794	na	na	na	na	na
scaffold1248_size10783	None	+	10783	na	na	na	na	na
scaffold1249_size10763	None	+	10763	na	na	na	na	na
scaffold1251_size10739	None	+	10739	na	na	na	na	na
scaffold1252_size10664	None	+	10664	na	na	na	na	na
scaffold1253_size10626	None	+	10626	na	na	na	na	na
scaffold1254_size10608	None	+	10608	na	na	na	na	na
scaffold1255_size10584	None	+	10584	na	na	na	na	na
scaffold1256_size10580	None	+	10580	na	na	na	na	na
scaffold1257_size10491	None	+	10491	na	na	na	na	na
scaffold1258_size10482	None	+	10482	na	na	na	na	na
scaffold1259_size10481	None	+	10481	na	na	na	na	na
scaffold1260_size10448	None	+	10448	na	na	na	na	na
scaffold1261_size10435	None	+	10435	na	na	na	na	na
scaffold1262_size10399	None	+	10399	na	na	na	na	na
scaffold1263_size10389	None	+	10389	na	na	na	na	na
scaffold1264_size10368	None	+	10368	na	na	na	na	na
scaffold1265_size10345	None	+	10345	na	na	na	na	na
scaffold1266_size10238	None	+	10238	na	na	na	na	na
scaffold1267_size10222	None	+	10222	na	na	na	na	na
scaffold1268_size10093	None	+	10093	na	na	na	na	na
scaffold1269_size10061	None	+	10061	na	na	na	na	na
scaffold1270_size10000	None	+	10000	na	na	na	na	na
scaffold1271_size9971	None	+	9971	na	na	na	na	na
scaffold1272_size9964	None	+	9964	na	na	na	na	na
scaffold1273_size9948	None	+	9948	na	na	na	na	na
scaffold1274_size9886	None	+	9886	na	na	na	na	na
scaffold1275_size9854	None	+	9854	na	na	na	na	na
scaffold1276_size9848	None	+	9848	na	na	na	na	na
scaffold1277_size9836	None	+	9836	na	na	na	na	na
scaffold1279_size9773	None	+	9773	na	na	na	na	na
scaffold1281_size9711	None	+	9711	na	na	na	na	na
scaffold1282_size9708	None	+	9708	na	na	na	na	na
scaffold1283_size9704	None	+	9704	na	na	na	na	na
scaffold1284_size9684	None	+	9684	na	na	na	na	na
scaffold1285_size9666	None	+	9666	na	na	na	na	na
scaffold1286_size9651	None	+	9651	na	na	na	na	na
scaffold1287_size9626	None	+	9626	na	na	na	na	na
scaffold1288_size9597	None	+	9597	na	na	na	na	na
scaffold1289_size9593	None	+	9593	na	na	na	na	na
scaffold1290_size9572	None	+	9572	na	na	na	na	na
scaffold1291_size9561	None	+	9561	na	na	na	na	na
scaffold1292_size9548	None	+	9548	na	na	na	na	na
scaffold1294_size9512	None	+	9512	na	na	na	na	na
scaffold1295_size9508	None	+	9508	na	na	na	na	na
scaffold1296_size9482	None	+	9482	na	na	na	na	na
scaffold1297_size9464	None	+	9464	na	na	na	na	na
scaffold1298_size9439	None	+	9439	na	na	na	na	na
scaffold1299_size9417	None	+	9417	na	na	na	na	na
scaffold1300_size9405	None	+	9405	na	na	na	na	na
scaffold1301_size9367	None	+	9367	na	na	na	na	na
scaffold1302_size9365	None	+	9365	na	na	na	na	na
scaffold1303_size9337	None	+	9337	na	na	na	na	na
scaffold1304_size9285	None	+	9285	na	na	na	na	na
scaffold1305_size9280	None	+	9280	na	na	na	na	na
scaffold1306_size9246	None	+	9246	na	na	na	na	na
scaffold1308_size9198	None	+	9198	na	na	na	na	na
scaffold1309_size9170	None	+	9170	na	na	na	na	na
scaffold1310_size9169	None	+	9169	na	na	na	na	na
scaffold1311_size9141	None	+	9141	na	na	na	na	na
scaffold1312_size9101	None	+	9101	na	na	na	na	na
scaffold1313_size9089	None	+	9089	na	na	na	na	na
scaffold1314_size9040	None	+	9040	na	na	na	na	na
scaffold1315_size9015	None	+	9015	na	na	na	na	na
scaffold1316_size8997	None	+	8997	na	na	na	na	na
scaffold1317_size8987	None	+	8987	na	na	na	na	na
scaffold1319_size8926	None	+	8926	na	na	na	na	na
scaffold1320_size8910	None	+	8910	na	na	na	na	na
scaffold1321_size8904	None	+	8904	na	na	na	na	na
scaffold1322_size8897	None	+	8897	na	na	na	na	na
scaffold1323_size8750	None	+	8750	na	na	na	na	na
scaffold1324_size8748	None	+	8748	na	na	na	na	na
scaffold1325_size8742	None	+	8742	na	na	na	na	na
scaffold1326_size8736	None	+	8736	na	na	na	na	na
scaffold1327_size8709	None	+	8709	na	na	na	na	na
scaffold1328_size8685	None	+	8685	na	na	na	na	na
scaffold1329_size8672	None	+	8672	na	na	na	na	na
scaffold1330_size8669	None	+	8669	na	na	na	na	na
scaffold1331_size8631	None	+	8631	na	na	na	na	na
scaffold1332_size8611	None	+	8611	na	na	na	na	na
scaffold1333_size8607	None	+	8607	na	na	na	na	na
scaffold1334_size8604	None	+	8604	na	na	na	na	na
scaffold1335_size8550	None	+	8550	na	na	na	na	na
scaffold1336_size8539	None	+	8539	na	na	na	na	na
scaffold1337_size8463	None	+	8463	na	na	na	na	na
scaffold1338_size8444	None	+	8444	na	na	na	na	na
scaffold1339_size8438	None	+	8438	na	na	na	na	na
scaffold1340_size8422	None	+	8422	na	na	na	na	na
scaffold1341_size8419	None	+	8419	na	na	na	na	na
scaffold1342_size8395	None	+	8395	na	na	na	na	na
scaffold1343_size8385	None	+	8385	na	na	na	na	na
scaffold1344_size8343	None	+	8343	na	na	na	na	na
scaffold1345_size8339	None	+	8339	na	na	na	na	na
scaffold1346_size8295	None	+	8295	na	na	na	na	na
scaffold1347_size8291	None	+	8291	na	na	na	na	na
scaffold1348_size8263	None	+	8263	na	na	na	na	na
scaffold1349_size8246	None	+	8246	na	na	na	na	na
scaffold1350_size8229	None	+	8229	na	na	na	na	na
scaffold1351_size8190	None	+	8190	na	na	na	na	na
scaffold1352_size8189	None	+	8189	na	na	na	na	na
scaffold1353_size8179	None	+	8179	na	na	na	na	na
scaffold1354_size8179	None	+	8179	na	na	na	na	na
scaffold1355_size8172	None	+	8172	na	na	na	na	na
scaffold1356_size8155	None	+	8155	na	na	na	na	na
scaffold1357_size8139	None	+	8139	na	na	na	na	na
scaffold1358_size8137	None	+	8137	na	na	na	na	na
scaffold1359_size8137	None	+	8137	na	na	na	na	na
scaffold1360_size8115	None	+	8115	na	na	na	na	na
scaffold1362_size8094	None	+	8094	na	na	na	na	na
scaffold1363_size8071	None	+	8071	na	na	na	na	na
scaffold1364_size8066	None	+	8066	na	na	na	na	na
scaffold1365_size8052	None	+	8052	na	na	na	na	na
scaffold1366_size8034	None	+	8034	na	na	na	na	na
scaffold1367_size7991	None	+	7991	na	na	na	na	na
scaffold1368_size7988	None	+	7988	na	na	na	na	na
scaffold1369_size7988	None	+	7988	na	na	na	na	na
scaffold1370_size7986	None	+	7986	na	na	na	na	na
scaffold1371_size7914	None	+	7914	na	na	na	na	na
scaffold1372_size7912	None	+	7912	na	na	na	na	na
scaffold1373_size7910	None	+	7910	na	na	na	na	na
scaffold1374_size7884	None	+	7884	na	na	na	na	na
scaffold1375_size7874	None	+	7874	na	na	na	na	na
scaffold1376_size7863	None	+	7863	na	na	na	na	na
scaffold1377_size7794	None	+	7794	na	na	na	na	na
scaffold1378_size7773	None	+	7773	na	na	na	na	na
scaffold1379_size7743	None	+	7743	na	na	na	na	na
scaffold1380_size7672	None	+	7672	na	na	na	na	na
scaffold1381_size7627	None	+	7627	na	na	na	na	na
scaffold1384_size7602	None	+	7602	na	na	na	na	na
scaffold1385_size7590	None	+	7590	na	na	na	na	na
scaffold1386_size7581	None	+	7581	na	na	na	na	na
scaffold1387_size7493	None	+	7493	na	na	na	na	na
scaffold1389_size7485	None	+	7485	na	na	na	na	na
scaffold1390_size7455	None	+	7455	na	na	na	na	na
scaffold1391_size7447	None	+	7447	na	na	na	na	na
scaffold1392_size7328	None	+	7328	na	na	na	na	na
scaffold1393_size7326	None	+	7326	na	na	na	na	na
scaffold1394_size7323	None	+	7323	na	na	na	na	na
scaffold1395_size7295	None	+	7295	na	na	na	na	na
scaffold1396_size7292	None	+	7292	na	na	na	na	na
scaffold1398_size7278	None	+	7278	na	na	na	na	na
scaffold1399_size7274	None	+	7274	na	na	na	na	na
scaffold1400_size7255	None	+	7255	na	na	na	na	na
scaffold1402_size7215	None	+	7215	na	na	na	na	na
scaffold1403_size7198	None	+	7198	na	na	na	na	na
scaffold1404_size7197	None	+	7197	na	na	na	na	na
scaffold1405_size7196	None	+	7196	na	na	na	na	na
scaffold1406_size7174	None	+	7174	na	na	na	na	na
scaffold1407_size7167	None	+	7167	na	na	na	na	na
scaffold1408_size7164	None	+	7164	na	na	na	na	na
scaffold1409_size7141	None	+	7141	na	na	na	na	na
scaffold1410_size7102	None	+	7102	na	na	na	na	na
scaffold1411_size7102	None	+	7102	na	na	na	na	na
scaffold1412_size7091	None	+	7091	na	na	na	na	na
scaffold1413_size7090	None	+	7090	na	na	na	na	na
scaffold1414_size7087	None	+	7087	na	na	na	na	na
scaffold1415_size7076	None	+	7076	na	na	na	na	na
scaffold1416_size7067	None	+	7067	na	na	na	na	na
scaffold1417_size7047	None	+	7047	na	na	na	na	na
scaffold1418_size7026	None	+	7026	na	na	na	na	na
scaffold1419_size7013	None	+	7013	na	na	na	na	na
scaffold1420_size6990	None	+	6990	na	na	na	na	na
scaffold1421_size6951	None	+	6951	na	na	na	na	na
scaffold1422_size6930	None	+	6930	na	na	na	na	na
scaffold1424_size6888	None	+	6888	na	na	na	na	na
scaffold1425_size6882	None	+	6882	na	na	na	na	na
scaffold1426_size6862	None	+	6862	na	na	na	na	na
scaffold1427_size6844	None	+	6844	na	na	na	na	na
scaffold1428_size6838	None	+	6838	na	na	na	na	na
scaffold1429_size6812	None	+	6812	na	na	na	na	na
scaffold1430_size6808	None	+	6808	na	na	na	na	na
scaffold1431_size6786	None	+	6786	na	na	na	na	na
scaffold1432_size6762	None	+	6762	na	na	na	na	na
scaffold1433_size6757	None	+	6757	na	na	na	na	na
scaffold1434_size6737	None	+	6737	na	na	na	na	na
scaffold1435_size6727	None	+	6727	na	na	na	na	na
scaffold1436_size6721	None	+	6721	na	na	na	na	na
scaffold1437_size6717	None	+	6717	na	na	na	na	na
scaffold1438_size6706	None	+	6706	na	na	na	na	na
scaffold1439_size6703	None	+	6703	na	na	na	na	na
scaffold1440_size6702	None	+	6702	na	na	na	na	na
scaffold1441_size6701	None	+	6701	na	na	na	na	na
scaffold1442_size6698	None	+	6698	na	na	na	na	na
scaffold1443_size6691	None	+	6691	na	na	na	na	na
scaffold1444_size6671	None	+	6671	na	na	na	na	na
scaffold1445_size6657	None	+	6657	na	na	na	na	na
scaffold1446_size6647	None	+	6647	na	na	na	na	na
scaffold1447_size6641	None	+	6641	na	na	na	na	na
scaffold1448_size6619	None	+	6619	na	na	na	na	na
scaffold1451_size6563	None	+	6563	na	na	na	na	na
scaffold1452_size6558	None	+	6558	na	na	na	na	na
scaffold1453_size6555	None	+	6555	na	na	na	na	na
scaffold1454_size6544	None	+	6544	na	na	na	na	na
scaffold1455_size6540	None	+	6540	na	na	na	na	na
scaffold1456_size6514	None	+	6514	na	na	na	na	na
scaffold1457_size6488	None	+	6488	na	na	na	na	na
scaffold1458_size6461	None	+	6461	na	na	na	na	na
scaffold1459_size6420	None	+	6420	na	na	na	na	na
scaffold1460_size6369	None	+	6369	na	na	na	na	na
scaffold1461_size6327	None	+	6327	na	na	na	na	na
scaffold1462_size6324	None	+	6324	na	na	na	na	na
scaffold1463_size6315	None	+	6315	na	na	na	na	na
scaffold1464_size6280	None	+	6280	na	na	na	na	na
scaffold1466_size6245	None	+	6245	na	na	na	na	na
scaffold1467_size6224	None	+	6224	na	na	na	na	na
scaffold1468_size6224	None	+	6224	na	na	na	na	na
scaffold1469_size6212	None	+	6212	na	na	na	na	na
scaffold1470_size6202	None	+	6202	na	na	na	na	na
scaffold1471_size6194	None	+	6194	na	na	na	na	na
scaffold1472_size6193	None	+	6193	na	na	na	na	na
scaffold1473_size6182	None	+	6182	na	na	na	na	na
scaffold1474_size6163	None	+	6163	na	na	na	na	na
scaffold1475_size6163	None	+	6163	na	na	na	na	na
scaffold1476_size6158	None	+	6158	na	na	na	na	na
scaffold1477_size6141	None	+	6141	na	na	na	na	na
scaffold1478_size6136	None	+	6136	na	na	na	na	na
scaffold1479_size6130	None	+	6130	na	na	na	na	na
scaffold1480_size6120	None	+	6120	na	na	na	na	na
scaffold1481_size6117	None	+	6117	na	na	na	na	na
scaffold1482_size6094	None	+	6094	na	na	na	na	na
scaffold1483_size6085	None	+	6085	na	na	na	na	na
scaffold1484_size6073	None	+	6073	na	na	na	na	na
scaffold1485_size6042	None	+	6042	na	na	na	na	na
scaffold1486_size6039	None	+	6039	na	na	na	na	na
scaffold1488_size6031	None	+	6031	na	na	na	na	na
scaffold1489_size6012	None	+	6012	na	na	na	na	na
scaffold1490_size6003	None	+	6003	na	na	na	na	na
scaffold1492_size5984	None	+	5984	na	na	na	na	na
scaffold1494_size5945	None	+	5945	na	na	na	na	na
scaffold1496_size5945	None	+	5945	na	na	na	na	na
scaffold1497_size5931	None	+	5931	na	na	na	na	na
scaffold1498_size5927	None	+	5927	na	na	na	na	na
scaffold1500_size5911	None	+	5911	na	na	na	na	na
scaffold1501_size5911	None	+	5911	na	na	na	na	na
scaffold1502_size5910	None	+	5910	na	na	na	na	na
scaffold1503_size5883	None	+	5883	na	na	na	na	na
scaffold1504_size5865	None	+	5865	na	na	na	na	na
scaffold1505_size5836	None	+	5836	na	na	na	na	na
scaffold1506_size5830	None	+	5830	na	na	na	na	na
scaffold1507_size5813	None	+	5813	na	na	na	na	na
scaffold1508_size5810	None	+	5810	na	na	na	na	na
scaffold1509_size5806	None	+	5806	na	na	na	na	na
scaffold1511_size5773	None	+	5773	na	na	na	na	na
scaffold1512_size5771	None	+	5771	na	na	na	na	na
scaffold1513_size5756	None	+	5756	na	na	na	na	na
scaffold1514_size5747	None	+	5747	na	na	na	na	na
scaffold1515_size5737	None	+	5737	na	na	na	na	na
scaffold1516_size5732	None	+	5732	na	na	na	na	na
scaffold1517_size5709	None	+	5709	na	na	na	na	na
scaffold1518_size5697	None	+	5697	na	na	na	na	na
scaffold1519_size5693	None	+	5693	na	na	na	na	na
scaffold1520_size5688	None	+	5688	na	na	na	na	na
scaffold1521_size5687	None	+	5687	na	na	na	na	na
scaffold1522_size5680	None	+	5680	na	na	na	na	na
scaffold1524_size5672	None	+	5672	na	na	na	na	na
scaffold1525_size5668	None	+	5668	na	na	na	na	na
scaffold1526_size5634	None	+	5634	na	na	na	na	na
scaffold1527_size5634	None	+	5634	na	na	na	na	na
scaffold1529_size5620	None	+	5620	na	na	na	na	na
scaffold1530_size5592	None	+	5592	na	na	na	na	na
scaffold1531_size5547	None	+	5547	na	na	na	na	na
scaffold1532_size5522	None	+	5522	na	na	na	na	na
scaffold1533_size5517	None	+	5517	na	na	na	na	na
scaffold1535_size5500	None	+	5500	na	na	na	na	na
scaffold1536_size5475	None	+	5475	na	na	na	na	na
scaffold1537_size5455	None	+	5455	na	na	na	na	na
scaffold1538_size5444	None	+	5444	na	na	na	na	na
scaffold1539_size5439	None	+	5439	na	na	na	na	na
scaffold1540_size5431	None	+	5431	na	na	na	na	na
scaffold1541_size5404	None	+	5404	na	na	na	na	na
scaffold1542_size5399	None	+	5399	na	na	na	na	na
scaffold1543_size5394	None	+	5394	na	na	na	na	na
scaffold1544_size5385	None	+	5385	na	na	na	na	na
scaffold1545_size5374	None	+	5374	na	na	na	na	na
scaffold1547_size5356	None	+	5356	na	na	na	na	na
scaffold1548_size5354	None	+	5354	na	na	na	na	na
scaffold1549_size5353	None	+	5353	na	na	na	na	na
scaffold1550_size5334	None	+	5334	na	na	na	na	na
scaffold1551_size5329	None	+	5329	na	na	na	na	na
scaffold1552_size5329	None	+	5329	na	na	na	na	na
scaffold1553_size5297	None	+	5297	na	na	na	na	na
scaffold1554_size5290	None	+	5290	na	na	na	na	na
scaffold1555_size5254	None	+	5254	na	na	na	na	na
scaffold1556_size5248	None	+	5248	na	na	na	na	na
scaffold1557_size5243	None	+	5243	na	na	na	na	na
scaffold1558_size5242	None	+	5242	na	na	na	na	na
scaffold1559_size5237	None	+	5237	na	na	na	na	na
scaffold1560_size5225	None	+	5225	na	na	na	na	na
scaffold1561_size5207	None	+	5207	na	na	na	na	na
scaffold1562_size5203	None	+	5203	na	na	na	na	na
scaffold1564_size5150	None	+	5150	na	na	na	na	na
scaffold1565_size5141	None	+	5141	na	na	na	na	na
scaffold1566_size5131	None	+	5131	na	na	na	na	na
scaffold1567_size5090	None	+	5090	na	na	na	na	na
scaffold1568_size5088	None	+	5088	na	na	na	na	na
scaffold1569_size5082	None	+	5082	na	na	na	na	na
scaffold1570_size5079	None	+	5079	na	na	na	na	na
scaffold1571_size5077	None	+	5077	na	na	na	na	na
scaffold1572_size5076	None	+	5076	na	na	na	na	na
scaffold1573_size5057	None	+	5057	na	na	na	na	na
scaffold1574_size5055	None	+	5055	na	na	na	na	na
scaffold1575_size5047	None	+	5047	na	na	na	na	na
scaffold1576_size5042	None	+	5042	na	na	na	na	na
scaffold1577_size5040	None	+	5040	na	na	na	na	na
scaffold1578_size5033	None	+	5033	na	na	na	na	na
scaffold1579_size4969	None	+	4969	na	na	na	na	na
scaffold1580_size4850	None	+	4850	na	na	na	na	na
scaffold1581_size4755	None	+	4755	na	na	na	na	na
scaffold1582_size4715	None	+	4715	na	na	na	na	na
scaffold1583_size4683	None	+	4683	na	na	na	na	na
scaffold1584_size4653	None	+	4653	na	na	na	na	na
scaffold1585_size4648	None	+	4648	na	na	na	na	na
scaffold1586_size4565	None	+	4565	na	na	na	na	na
scaffold1587_size4534	None	+	4534	na	na	na	na	na
scaffold1588_size4520	None	+	4520	na	na	na	na	na
scaffold1589_size4519	None	+	4519	na	na	na	na	na
scaffold1590_size4518	None	+	4518	na	na	na	na	na
scaffold1591_size4511	None	+	4511	na	na	na	na	na
scaffold1592_size4508	None	+	4508	na	na	na	na	na
scaffold1593_size4461	None	+	4461	na	na	na	na	na
scaffold1594_size4446	None	+	4446	na	na	na	na	na
scaffold1595_size4434	None	+	4434	na	na	na	na	na
scaffold1596_size4415	None	+	4415	na	na	na	na	na
scaffold1597_size4411	None	+	4411	na	na	na	na	na
scaffold1598_size4395	None	+	4395	na	na	na	na	na
scaffold1599_size4364	None	+	4364	na	na	na	na	na
scaffold1600_size4318	None	+	4318	na	na	na	na	na
scaffold1601_size4304	None	+	4304	na	na	na	na	na
scaffold1603_size4267	None	+	4267	na	na	na	na	na
scaffold1604_size4224	None	+	4224	na	na	na	na	na
scaffold1605_size4201	None	+	4201	na	na	na	na	na
scaffold1606_size4188	None	+	4188	na	na	na	na	na
scaffold1607_size4169	None	+	4169	na	na	na	na	na
scaffold1608_size4127	None	+	4127	na	na	na	na	na
scaffold1609_size4077	None	+	4077	na	na	na	na	na
scaffold1610_size4036	None	+	4036	na	na	na	na	na
scaffold1611_size4035	None	+	4035	na	na	na	na	na
scaffold1612_size4029	None	+	4029	na	na	na	na	na
scaffold1613_size3940	None	+	3940	na	na	na	na	na
scaffold1614_size3928	None	+	3928	na	na	na	na	na
scaffold1615_size3843	None	+	3843	na	na	na	na	na
scaffold1616_size3794	None	+	3794	na	na	na	na	na
scaffold1617_size3773	None	+	3773	na	na	na	na	na
scaffold1618_size3756	None	+	3756	na	na	na	na	na
scaffold1619_size3740	None	+	3740	na	na	na	na	na
scaffold1620_size3738	None	+	3738	na	na	na	na	na
scaffold1621_size3728	None	+	3728	na	na	na	na	na
scaffold1622_size3720	None	+	3720	na	na	na	na	na
scaffold1623_size3704	None	+	3704	na	na	na	na	na
scaffold1624_size3670	None	+	3670	na	na	na	na	na
scaffold1625_size3582	None	+	3582	na	na	na	na	na
scaffold1626_size3564	None	+	3564	na	na	na	na	na
scaffold1627_size3560	None	+	3560	na	na	na	na	na
scaffold1628_size3523	None	+	3523	na	na	na	na	na
scaffold1629_size3507	None	+	3507	na	na	na	na	na
scaffold1630_size3424	None	+	3424	na	na	na	na	na
scaffold1631_size3407	None	+	3407	na	na	na	na	na
scaffold1632_size3402	None	+	3402	na	na	na	na	na
scaffold1633_size3375	None	+	3375	na	na	na	na	na
scaffold1634_size3362	None	+	3362	na	na	na	na	na
scaffold1635_size3358	None	+	3358	na	na	na	na	na
scaffold1636_size3334	None	+	3334	na	na	na	na	na
scaffold1637_size3307	None	+	3307	na	na	na	na	na
scaffold1638_size3266	None	+	3266	na	na	na	na	na
scaffold1639_size3241	None	+	3241	na	na	na	na	na
scaffold1640_size3190	None	+	3190	na	na	na	na	na
scaffold1641_size3185	None	+	3185	na	na	na	na	na
scaffold1642_size3172	None	+	3172	na	na	na	na	na
scaffold1643_size3170	None	+	3170	na	na	na	na	na
scaffold1644_size3146	None	+	3146	na	na	na	na	na
scaffold1645_size3144	None	+	3144	na	na	na	na	na
scaffold1646_size3136	None	+	3136	na	na	na	na	na
scaffold1647_size3071	None	+	3071	na	na	na	na	na
scaffold1648_size3037	None	+	3037	na	na	na	na	na
scaffold1649_size3028	None	+	3028	na	na	na	na	na
scaffold1650_size3011	None	+	3011	na	na	na	na	na
scaffold1651_size2985	None	+	2985	na	na	na	na	na
scaffold1652_size2967	None	+	2967	na	na	na	na	na
scaffold1653_size2900	None	+	2900	na	na	na	na	na
scaffold1654_size2886	None	+	2886	na	na	na	na	na
scaffold1655_size2879	None	+	2879	na	na	na	na	na
scaffold1656_size2757	None	+	2757	na	na	na	na	na
scaffold1657_size2745	None	+	2745	na	na	na	na	na
scaffold1658_size2742	None	+	2742	na	na	na	na	na
scaffold1659_size2686	None	+	2686	na	na	na	na	na
scaffold1660_size2643	None	+	2643	na	na	na	na	na
scaffold1661_size2638	None	+	2638	na	na	na	na	na
scaffold1662_size2633	None	+	2633	na	na	na	na	na
scaffold1663_size2629	None	+	2629	na	na	na	na	na
scaffold1664_size2625	None	+	2625	na	na	na	na	na
scaffold1665_size2613	None	+	2613	na	na	na	na	na
scaffold1666_size2599	None	+	2599	na	na	na	na	na
scaffold1667_size2597	None	+	2597	na	na	na	na	na
scaffold1668_size2544	None	+	2544	na	na	na	na	na
scaffold1669_size2537	None	+	2537	na	na	na	na	na
scaffold1670_size2495	None	+	2495	na	na	na	na	na
scaffold1671_size2464	None	+	2464	na	na	na	na	na
scaffold1672_size2463	None	+	2463	na	na	na	na	na
scaffold1673_size2462	None	+	2462	na	na	na	na	na
scaffold1674_size2456	None	+	2456	na	na	na	na	na
scaffold1675_size2428	None	+	2428	na	na	na	na	na
scaffold1676_size2410	None	+	2410	na	na	na	na	na
scaffold1677_size2388	None	+	2388	na	na	na	na	na
scaffold1678_size2385	None	+	2385	na	na	na	na	na
scaffold1679_size2382	None	+	2382	na	na	na	na	na
scaffold1680_size2380	None	+	2380	na	na	na	na	na
scaffold1681_size2373	None	+	2373	na	na	na	na	na
scaffold1682_size2372	None	+	2372	na	na	na	na	na
scaffold1683_size2316	None	+	2316	na	na	na	na	na
scaffold1684_size2315	None	+	2315	na	na	na	na	na
scaffold1685_size2304	None	+	2304	na	na	na	na	na
scaffold1686_size2301	None	+	2301	na	na	na	na	na
scaffold1687_size2280	None	+	2280	na	na	na	na	na
scaffold1688_size2270	None	+	2270	na	na	na	na	na
scaffold1689_size2265	None	+	2265	na	na	na	na	na
scaffold1690_size2223	None	+	2223	na	na	na	na	na
scaffold1691_size2220	None	+	2220	na	na	na	na	na
scaffold1692_size2219	None	+	2219	na	na	na	na	na
scaffold1693_size2215	None	+	2215	na	na	na	na	na
scaffold1694_size2212	None	+	2212	na	na	na	na	na
scaffold1695_size2204	None	+	2204	na	na	na	na	na
scaffold1696_size2165	None	+	2165	na	na	na	na	na
scaffold1697_size2160	None	+	2160	na	na	na	na	na
scaffold1698_size2157	None	+	2157	na	na	na	na	na
scaffold1699_size2145	None	+	2145	na	na	na	na	na
scaffold1700_size2129	None	+	2129	na	na	na	na	na
scaffold1701_size2079	None	+	2079	na	na	na	na	na
scaffold1702_size2072	None	+	2072	na	na	na	na	na
scaffold1703_size2046	None	+	2046	na	na	na	na	na
scaffold1704_size2016	None	+	2016	na	na	na	na	na
scaffold1705_size1996	None	+	1996	na	na	na	na	na
scaffold1706_size1991	None	+	1991	na	na	na	na	na
scaffold1707_size1989	None	+	1989	na	na	na	na	na
scaffold1708_size1959	None	+	1959	na	na	na	na	na
scaffold1710_size1940	None	+	1940	na	na	na	na	na
scaffold1711_size1939	None	+	1939	na	na	na	na	na
scaffold1712_size1930	None	+	1930	na	na	na	na	na
scaffold1713_size1926	None	+	1926	na	na	na	na	na
scaffold1714_size1909	None	+	1909	na	na	na	na	na
scaffold1715_size1898	None	+	1898	na	na	na	na	na
scaffold1716_size1887	None	+	1887	na	na	na	na	na
scaffold1717_size1851	None	+	1851	na	na	na	na	na
scaffold1718_size1850	None	+	1850	na	na	na	na	na
scaffold1719_size1824	None	+	1824	na	na	na	na	na
scaffold1720_size1787	None	+	1787	na	na	na	na	na
scaffold1721_size1784	None	+	1784	na	na	na	na	na
scaffold1722_size1781	None	+	1781	na	na	na	na	na
scaffold1723_size1771	None	+	1771	na	na	na	na	na
scaffold1724_size1762	None	+	1762	na	na	na	na	na
scaffold1725_size1721	None	+	1721	na	na	na	na	na
scaffold1726_size1713	None	+	1713	na	na	na	na	na
scaffold1727_size1710	None	+	1710	na	na	na	na	na
scaffold1728_size1708	None	+	1708	na	na	na	na	na
scaffold1729_size1695	None	+	1695	na	na	na	na	na
scaffold1730_size1692	None	+	1692	na	na	na	na	na
scaffold1731_size1690	None	+	1690	na	na	na	na	na
scaffold1732_size1683	None	+	1683	na	na	na	na	na
scaffold1733_size1677	None	+	1677	na	na	na	na	na
scaffold1734_size1674	None	+	1674	na	na	na	na	na
scaffold1735_size1666	None	+	1666	na	na	na	na	na
scaffold1736_size1666	None	+	1666	na	na	na	na	na
scaffold1737_size1665	None	+	1665	na	na	na	na	na
scaffold1738_size1657	None	+	1657	na	na	na	na	na
scaffold1739_size1627	None	+	1627	na	na	na	na	na
scaffold1740_size1619	None	+	1619	na	na	na	na	na
scaffold1741_size1611	None	+	1611	na	na	na	na	na
scaffold1742_size1609	None	+	1609	na	na	na	na	na
scaffold1743_size1607	None	+	1607	na	na	na	na	na
scaffold1744_size1602	None	+	1602	na	na	na	na	na
scaffold1745_size1575	None	+	1575	na	na	na	na	na
scaffold1746_size1573	None	+	1573	na	na	na	na	na
scaffold1747_size1572	None	+	1572	na	na	na	na	na
scaffold1748_size1558	None	+	1558	na	na	na	na	na
scaffold1749_size1534	None	+	1534	na	na	na	na	na
scaffold1750_size1525	None	+	1525	na	na	na	na	na
scaffold1751_size1516	None	+	1516	na	na	na	na	na
scaffold1752_size1510	None	+	1510	na	na	na	na	na
scaffold1753_size1504	None	+	1504	na	na	na	na	na
scaffold1754_size1491	None	+	1491	na	na	na	na	na
scaffold1755_size1489	None	+	1489	na	na	na	na	na
scaffold1756_size1484	None	+	1484	na	na	na	na	na
scaffold1757_size1479	None	+	1479	na	na	na	na	na
scaffold1758_size1473	None	+	1473	na	na	na	na	na
scaffold1759_size1472	None	+	1472	na	na	na	na	na
scaffold1760_size1470	None	+	1470	na	na	na	na	na
scaffold1761_size1452	None	+	1452	na	na	na	na	na
scaffold1762_size1449	None	+	1449	na	na	na	na	na
scaffold1763_size1435	None	+	1435	na	na	na	na	na
scaffold1764_size1434	None	+	1434	na	na	na	na	na
scaffold1765_size1433	None	+	1433	na	na	na	na	na
scaffold1766_size1429	None	+	1429	na	na	na	na	na
scaffold1767_size1423	None	+	1423	na	na	na	na	na
scaffold1768_size1416	None	+	1416	na	na	na	na	na
scaffold1769_size1412	None	+	1412	na	na	na	na	na
scaffold1770_size1405	None	+	1405	na	na	na	na	na
scaffold1771_size1392	None	+	1392	na	na	na	na	na
scaffold1772_size1391	None	+	1391	na	na	na	na	na
scaffold1773_size1388	None	+	1388	na	na	na	na	na
scaffold1774_size1378	None	+	1378	na	na	na	na	na
scaffold1775_size1363	None	+	1363	na	na	na	na	na
scaffold1776_size1358	None	+	1358	na	na	na	na	na
scaffold1777_size1344	None	+	1344	na	na	na	na	na
scaffold1778_size1343	None	+	1343	na	na	na	na	na
scaffold1779_size1338	None	+	1338	na	na	na	na	na
scaffold1780_size1338	None	+	1338	na	na	na	na	na
scaffold1781_size1332	None	+	1332	na	na	na	na	na
scaffold1782_size1329	None	+	1329	na	na	na	na	na
scaffold1783_size1328	None	+	1328	na	na	na	na	na
scaffold1784_size1315	None	+	1315	na	na	na	na	na
scaffold1785_size1305	None	+	1305	na	na	na	na	na
scaffold1786_size1299	None	+	1299	na	na	na	na	na
scaffold1787_size1278	None	+	1278	na	na	na	na	na
scaffold1788_size1276	None	+	1276	na	na	na	na	na
scaffold1789_size1264	None	+	1264	na	na	na	na	na
scaffold1790_size1262	None	+	1262	na	na	na	na	na
scaffold1791_size1251	None	+	1251	na	na	na	na	na
scaffold1792_size1245	None	+	1245	na	na	na	na	na
scaffold1793_size1233	None	+	1233	na	na	na	na	na
scaffold1794_size1220	None	+	1220	na	na	na	na	na
scaffold1795_size1219	None	+	1219	na	na	na	na	na
scaffold1796_size1218	None	+	1218	na	na	na	na	na
scaffold1797_size1214	None	+	1214	na	na	na	na	na
scaffold1798_size1213	None	+	1213	na	na	na	na	na
scaffold1799_size1209	None	+	1209	na	na	na	na	na
scaffold1800_size1205	None	+	1205	na	na	na	na	na
scaffold1801_size1203	None	+	1203	na	na	na	na	na
scaffold1802_size1196	None	+	1196	na	na	na	na	na
scaffold1803_size1184	None	+	1184	na	na	na	na	na
scaffold1804_size1173	None	+	1173	na	na	na	na	na
scaffold1805_size1172	None	+	1172	na	na	na	na	na
scaffold1806_size1172	None	+	1172	na	na	na	na	na
scaffold1807_size1165	None	+	1165	na	na	na	na	na
scaffold1808_size1157	None	+	1157	na	na	na	na	na
scaffold1809_size1144	None	+	1144	na	na	na	na	na
scaffold1810_size1130	None	+	1130	na	na	na	na	na
scaffold1811_size1130	None	+	1130	na	na	na	na	na
scaffold1812_size1112	None	+	1112	na	na	na	na	na
scaffold1813_size1106	None	+	1106	na	na	na	na	na
scaffold1814_size1100	None	+	1100	na	na	na	na	na
scaffold1815_size1100	None	+	1100	na	na	na	na	na
scaffold1816_size1095	None	+	1095	na	na	na	na	na
scaffold1817_size1094	None	+	1094	na	na	na	na	na
scaffold1818_size1094	None	+	1094	na	na	na	na	na
scaffold1819_size1088	None	+	1088	na	na	na	na	na
scaffold1820_size1088	None	+	1088	na	na	na	na	na
scaffold1821_size1084	None	+	1084	na	na	na	na	na
scaffold1822_size1076	None	+	1076	na	na	na	na	na
scaffold1823_size1070	None	+	1070	na	na	na	na	na
scaffold1824_size1052	None	+	1052	na	na	na	na	na
scaffold1825_size1045	None	+	1045	na	na	na	na	na
scaffold1826_size1043	None	+	1043	na	na	na	na	na
scaffold1827_size1032	None	+	1032	na	na	na	na	na
scaffold1828_size1030	None	+	1030	na	na	na	na	na
scaffold1829_size1016	None	+	1016	na	na	na	na	na
scaffold1830_size1016	None	+	1016	na	na	na	na	na
scaffold184_size485503	chr4	+	485503	5596	8299	23867706	2365979	2368727
scaffold585_size141312	chr4	+	141312	75383	88886	23867706	917162	2543033
scaffold251_size391187	chr4	+	391187	53577	54497	23867706	2113170	4314370
scaffold259_size384786	chr4	+	384786	364252	367588	23867706	611762	6325036
scaffold596_size138122	chr4	+	138122	54113	54187	23867706	3982693	3982767
scaffold68_size843662	chr4	+	843662	555751	798863	23867706	1904263	10779660
scaffold163_size528813	chr4	+	528813	152848	156824	23867706	5469735	5473725
scaffold168_size520293	chr4	+	520293	80724	84629	23867706	5469829	5473725
scaffold594_size138683	chr4	+	138683	4173	4739	23867706	5532707	5533282
scaffold175_size507515	chr4	+	507515	427512	428841	23867706	5726230	5727546
scaffold434_size237078	chr4	+	237078	117355	118345	23867706	5763805	5764796
scaffold35_size1080921	chr4	+	1080921	788818	794065	23867706	5469735	16687446
scaffold307_size341957	chr4	+	341957	318135	318798	23867706	7185627	7186364
scaffold502_size196668	chr4	+	196668	48252	48915	23867706	7185627	7186364
scaffold223_size435064	chr4	+	435064	31939	266648	23867706	643605	18957641
scaffold200_size464826	chr4	+	464826	246858	247049	23867706	8464855	8465048
scaffold853_size46902	chr4	+	46902	39059	39604	23867706	9178112	9178657
scaffold138_size578810	chr4	+	578810	92475	235674	23867706	5182672	10255523
scaffold296_size349755	chr4	+	349755	17112	20860	23867706	4313500	13617821
scaffold155_size543531	chr4	+	543531	28864	223415	23867706	12174188	19184631
scaffold879_size42848	chr4	+	42848	22682	23590	23867706	16323991	16324896
scaffold699_size96700	chr4	+	96700	78102	78430	23867706	16361224	16361559
scaffold391_size273082	chr4	+	273082	102258	264693	23867706	5182672	19233737
scaffold188_size480585	chr4	+	480585	246468	248109	23867706	18622015	18623656
scaffold587_size140297	chr4	+	140297	48328	48404	23867706	14525408	22134002
scaffold350_size304998	chr4	+	304998	156824	157000	23867706	19763886	19764062
scaffold597_size137995	chr4	+	137995	7351	19617	23867706	19893046	19919289
scaffold757_size75512	chr4	-	75512	57899	70165	23867706	19893046	19919289
scaffold992_size26005	chr4	-	26005	8392	20658	23867706	19893046	19919289
scaffold70_size835982	chr4	+	835982	521793	821445	23867706	18968923	20345771
scaffold64_size856543	chr4	+	856543	348212	349051	23867706	23250025	23250856
scaffold810_size58437	chr5	+	58437	24591	24854	25021643	721080	721343
scaffold136_size581398	chr5	+	581398	468815	470271	25021643	1865406	1866864
scaffold552_size162563	chr5	+	162563	96496	96727	25021643	3492072	3492303
scaffold976_size27186	chr5	+	27186	25014	25245	25021643	3492072	3492303
scaffold1125_size16441	chr5	+	16441	1941	2172	25021643	3492072	3492303
scaffold320_size333601	chr5	+	333601	320770	321030	25021643	3496002	3496297
scaffold343_size316294	chr5	+	316294	56088	62984	25021643	3197543	3715242
scaffold283_size361165	chr5	+	361165	294051	298124	25021643	3711015	3715242
scaffold440_size235831	chr5	+	235831	217023	220017	25021643	4981576	4984651
scaffold278_size365576	chr5	+	365576	142773	179032	25021643	4981576	4985054
scaffold256_size386676	chr5	+	386676	3426	4557	25021643	4982776	4983931
scaffold510_size188534	chr5	+	188534	28719	30400	25021643	4983915	4985681
scaffold537_size174685	chr5	+	174685	98096	116977	25021643	4982989	9798352
scaffold875_size43210	chr5	+	43210	4288	5396	25021643	6570392	6571500
scaffold1119_size16554	chr5	+	16554	3066	3112	25021643	7533514	7533560
scaffold1174_size14282	chr5	+	14282	9612	10096	25021643	7923424	7923908
scaffold614_size131169	chr5	+	131169	230	748	25021643	8080238	8080758
scaffold330_size322938	chr5	+	322938	222762	223082	25021643	8433920	8434240
scaffold370_size285785	chr5	+	285785	203508	203828	25021643	8433920	8434240
scaffold491_size201213	chr5	+	201213	110507	112186	25021643	9486856	9487793
scaffold101_size679088	chr5	+	679088	250691	255745	25021643	7923001	19489184
scaffold603_size133874	chr5	+	133874	34948	36190	25021643	13544420	13545661
scaffold5_size1651677	chr5	+	1651677	840260	977036	25021643	16659431	20176271
scaffold663_size112132	chr5	+	112132	109915	111963	25021643	17240796	17242879
scaffold906_size36960	chr5	-	36960	7192	9240	25021643	17240796	17242879
scaffold698_size97389	chr5	+	97389	54136	55032	25021643	17501112	17501989
scaffold84_size759781	chr5	+	759781	305426	312477	25021643	17642465	17649516
scaffold463_size217393	chr5	+	217393	149133	149236	25021643	19887331	19887434
scaffold17_size1411551	chr5	+	1411551	211530	752580	25021643	3464491	23581275
scaffold904_size37068	chr5	+	37068	26313	26555	25021643	20176036	20176271
scaffold321_size333409	chr5	+	333409	168982	174053	25021643	22425382	22432379
scaffold1233_size11201	chr5	+	11201	5311	5621	25021643	24078734	24079044
scaffold1234_size11197	chr5	+	11197	5576	5886	25021643	24078734	24079044
scaffold112_size645884	chr5	+	645884	524419	525519	25021643	24173156	24174259
scaffold241_size405056	chr5	+	405056	117924	118164	25021643	24844999	24845256
scaffold104_size664890	chr6	+	664890	128888	373653	21508407	669536	7879578
scaffold628_size126813	chr6	+	126813	40441	43189	21508407	1398220	1405455
scaffold86_size753315	chr6	+	753315	55583	640944	21508407	1503551	2401565
scaffold395_size268688	chr6	+	268688	155700	158877	21508407	2420685	2424043
scaffold206_size458013	chr6	+	458013	167754	167835	21508407	2718560	2718641
scaffold229_size422993	chr6	+	422993	155304	164033	21508407	3886578	3985671
scaffold473_size210511	chr6	+	210511	76622	77914	21508407	3984561	4014398
scaffold265_size376597	chr6	+	376597	208610	262641	21508407	3984351	4775770
scaffold310_size340163	chr6	+	340163	99651	110621	21508407	2458481	6364595
scaffold1401_size7223	chr6	-	7223	1872	2220	21508407	4785300	4785648
scaffold553_size162348	chr6	+	162348	40217	44368	21508407	5068186	5072308
scaffold387_size273758	chr6	+	273758	139734	144407	21508407	5066833	5072308
scaffold90_size731574	chr6	+	731574	367086	706582	21508407	5068186	7879584
scaffold1493_size5954	chr6	+	5954	4122	4284	21508407	5187703	5187862
scaffold423_size245578	chr6	+	245578	172461	172685	21508407	5192486	5195000
scaffold202_size463854	chr6	+	463854	51554	415381	21508407	3985328	5471458
scaffold476_size209410	chr6	+	209410	85563	86095	21508407	5959906	5960438
scaffold576_size146812	chr6	+	146812	47199	48788	21508407	6621460	6623044
scaffold525_size182403	chr6	+	182403	28099	28368	21508407	7035270	7035539
scaffold641_size121784	chr6	+	121784	31092	77291	21508407	1243134	7293014
scaffold103_size665001	chr6	+	665001	492186	492240	21508407	7339002	7339056
scaffold437_size236406	chr6	+	236406	9800	12697	21508407	6590061	14281365
scaffold34_size1082081	chr6	+	1082081	835063	837080	21508407	10179619	10181649
scaffold357_size296716	chr6	+	296716	156525	156582	21508407	5365441	17458062
scaffold1238_size10990	chr6	+	10990	8246	8303	21508407	5365441	17458062
scaffold787_size64947	chr6	+	64947	6557	7163	21508407	12158554	12159131
scaffold1004_size25060	chr6	+	25060	22251	22857	21508407	12158554	12159131
scaffold572_size148818	chr6	+	148818	2203	11415	21508407	12158554	19121735
scaffold53_size925423	chr6	+	925423	29956	916201	21508407	6590061	14699794
scaffold308_size341706	chr6	+	341706	17666	106074	21508407	13397280	16855674
scaffold69_size841560	chr6	+	841560	212134	822445	21508407	13852445	19121741
scaffold44_size1017685	chr6	+	1017685	248075	608333	21508407	1398220	15582484
scaffold4_size1665106	chr6	+	1665106	687535	1056532	21508407	13852445	14699794
scaffold363_size289583	chr6	+	289583	128658	208762	21508407	16848171	18833350
scaffold318_size334380	chr6	+	334380	15173	16051	21508407	17838272	17839150
scaffold38_size1053794	chr6	+	1053794	17376	19610	21508407	18589721	18591973
scaffold91_size726399	chr6	+	726399	20513	410208	21508407	18590034	19129484
scaffold1118_size16570	chr6	+	16570	13382	13466	21508407	19121657	19121741
scaffold232_size418928	chr6	+	418928	246980	247555	21508407	19878205	19878730
scaffold339_size318728	chr6	+	318728	53930	54072	21508407	19915919	19916061
scaffold74_size818217	chr6	+	818217	98802	99559	21508407	21425846	21426549
scaffold546_size167141	chr6	+	167141	46228	47787	21508407	21425846	21427344
scaffold400_size262257	chr7	+	262257	102303	103379	21026613	237583	238644
scaffold599_size134888	chr7	+	134888	48224	51998	21026613	856565	857108
scaffold304_size344087	chr7	+	344087	7040	7616	21026613	1487164	1487799
scaffold719_size90700	chr7	+	90700	65833	66033	21026613	1622608	1622808
scaffold516_size186372	chr7	+	186372	45819	46587	21026613	3201025	3201842
scaffold176_size503880	chr7	+	503880	489093	491525	21026613	3201826	3204289
scaffold1130_size16129	chr7	-	16129	5237	5813	21026613	3509034	3509631
scaffold27_size1214473	chr7	+	1214473	922226	923151	21026613	3654900	3655768
scaffold960_size28733	chr7	+	28733	24006	24226	21026613	4112041	4112287
scaffold408_size254463	chr7	+	254463	170001	197822	21026613	4097308	5089302
scaffold7_size1580086	chr7	+	1580086	1314972	1443175	21026613	4008688	18073777
scaffold30_size1136906	chr7	+	1136906	51692	1094667	21026613	3508937	8584109
scaffold192_size479242	chr7	+	479242	35511	36601	21026613	4688119	4689167
scaffold349_size305835	chr7	+	305835	23846	284753	21026613	4688119	15500515
scaffold286_size357339	chr7	+	357339	65954	67000	21026613	6142864	6143910
scaffold667_size110899	chr7	+	110899	76016	76408	21026613	6553987	6554370
scaffold1064_size20511	chr7	-	20511	18319	19174	21026613	6564489	6565413
scaffold647_size119004	chr7	+	119004	78867	79121	21026613	6601214	6601471
scaffold277_size366222	chr7	+	366222	127436	157317	21026613	6142864	8045309
scaffold574_size148320	chr7	+	148320	33649	38577	21026613	7413907	7500162
scaffold460_size220093	chr7	+	220093	138330	139339	21026613	7495426	7496438
scaffold909_size36614	chr7	+	36614	23155	24164	21026613	7495426	7496438
scaffold234_size415727	chr7	+	415727	168582	270431	21026613	481241	19450328
scaffold554_size161974	chr7	+	161974	143652	145413	21026613	8010074	8011826
scaffold1035_size22867	chr7	+	22867	10167	11928	21026613	8010074	8011826
scaffold477_size208692	chr7	+	208692	131020	133671	21026613	8409681	8412339
scaffold690_size98446	chr7	+	98446	22966	23452	21026613	9091413	9091958
scaffold902_size37658	chr7	+	37658	10507	14814	21026613	10290817	10295188
scaffold158_size541355	chr7	+	541355	131477	132807	21026613	11204592	11205909
scaffold111_size649699	chr7	+	649699	210413	527082	21026613	3201025	18655295
scaffold720_size90262	chr7	+	90262	57421	83540	21026613	8407677	14148055
scaffold235_size415264	chr7	+	415264	62791	90192	21026613	14366435	20468075
scaffold589_size139569	chr7	+	139569	133918	134382	21026613	14816964	14817531
scaffold242_size401956	chr7	+	401956	126409	126834	21026613	16702753	16703217
scaffold327_size324060	chr7	+	324060	138052	142609	21026613	17436786	17441403
scaffold717_size90790	chr7	+	90790	50915	51007	21026613	17563384	17563476
scaffold8_size1575602	chr7	+	1575602	711841	1225635	21026613	17275388	19270163
scaffold257_size385841	chr7	+	385841	23311	40331	21026613	16818685	19450328
scaffold18_size1404391	chr7	+	1404391	316855	319664	21026613	20684490	20687306
scaffold1278_size9822	chr7	+	9822	1703	4512	21026613	20684490	20687306
scaffold123_size610937	chr8	+	610937	394388	394773	22385789	324642	325027
scaffold215_size442783	chr8	+	442783	322214	323581	22385789	701573	702940
scaffold1129_size16224	chr8	+	16224	12932	13430	22385789	1039203	1039725
scaffold183_size488004	chr8	+	488004	286942	287287	22385789	2483628	2483973
scaffold458_size221370	chr8	+	221370	25048	25393	22385789	2483628	2483973
scaffold518_size185628	chr8	+	185628	152418	154988	22385789	478131	8177552
scaffold506_size193237	chr8	+	193237	31476	32067	22385789	4254266	4254857
scaffold26_size1224954	chr8	+	1224954	42205	46368	22385789	1930677	8180073
scaffold416_size249014	chr8	+	249014	41542	42237	22385789	1462573	9124009
scaffold856_size46335	chr8	+	46335	35503	35913	22385789	4579658	17078749
scaffold1139_size15707	chr8	+	15707	3583	4322	22385789	5643288	5644080
scaffold631_size125893	chr8	+	125893	66244	66316	22385789	1443085	15250778
scaffold1088_size18135	chr8	+	18135	15320	15392	22385789	1443085	15250778
scaffold298_size348755	chr8	+	348755	87147	315902	22385789	8175857	21647166
scaffold290_size354082	chr8	+	354082	253777	254326	22385789	9192936	9193484
scaffold326_size324086	chr8	+	324086	137838	139092	22385789	9233520	9234797
scaffold954_size29639	chr8	+	29639	23592	23841	22385789	9337977	9338245
scaffold600_size134883	chr8	+	134883	39014	40233	22385789	9905192	9906411
scaffold76_size807220	chr8	+	807220	699767	702275	22385789	10127263	10129861
scaffold146_size566370	chr8	+	566370	471658	482987	22385789	9905192	11518397
scaffold300_size346845	chr8	+	346845	140032	142218	22385789	11214085	11216277
scaffold224_size434566	chr8	+	434566	113242	113922	22385789	11270049	11270730
scaffold271_size370178	chr8	+	370178	106020	210649	22385789	8470797	11558993
scaffold196_size466988	chr8	+	466988	454564	457573	22385789	11555992	11558993
scaffold322_size332738	chr8	+	332738	244329	247338	22385789	11555992	11558993
scaffold319_size334000	chr8	+	334000	107651	109956	22385789	11790606	11792910
scaffold120_size617610	chr8	+	617610	276658	277600	22385789	12647435	12648385
scaffold865_size45177	chr8	+	45177	30664	30851	22385789	13210664	13210848
scaffold14_size1455245	chr8	+	1455245	451195	1258582	22385789	14228151	20724261
scaffold107_size656107	chr8	+	656107	373472	376870	22385789	14475359	14478755
scaffold529_size179514	chr8	+	179514	58986	60286	22385789	14520024	14521336
scaffold498_size197487	chr8	+	197487	109059	110269	22385789	11975733	15716773
scaffold24_size1299124	chr8	+	1299124	246049	1014617	22385789	3920489	15738434
scaffold675_size109163	chr8	+	109163	2218	3121	22385789	17916119	17917038
scaffold836_size51874	chr8	+	51874	3247	4150	22385789	17916119	17917038
scaffold29_size1161289	chr8	+	1161289	290463	292142	22385789	19981400	19983088
scaffold761_size73556	chr8	+	73556	73304	73368	22385789	20234476	20234540
scaffold1037_size22605	chr8	+	22605	8285	8349	22385789	20234476	20234540
scaffold643_size120596	chr8	+	120596	111937	112310	22385789	21491090	21491513
scaffold726_size87774	chr8	+	87774	16559	16936	22385789	21511816	21512205
scaffold275_size367480	chr8	+	367480	73020	74523	22385789	21559126	21560626
scaffold1110_size16795	chr8	+	16795	7682	7804	22385789	21647044	21647166
scaffold377_size278145	chr8	+	278145	30129	31590	22385789	21784710	21786229
scaffold51_size953629	chr8	+	953629	367067	874310	22385789	18687358	21917253
scaffold189_size480584	chr8	+	480584	129763	130666	22385789	22366589	22367628
scaffold592_size138862	chr8	+	138862	2764	3667	22385789	22366589	22367628
scaffold919_size34446	chr9	+	34446	7129	7204	23006712	253912	253987
scaffold454_size223947	chr9	+	223947	50641	51586	23006712	521638	522581
scaffold260_size384151	chr9	+	384151	148388	150841	23006712	522168	524676
scaffold80_size769704	chr9	+	769704	414132	421189	23006712	1025741	1032815
scaffold428_size240870	chr9	+	240870	11383	14399	23006712	1553584	1556664
scaffold1510_size5781	chr9	-	5781	2757	5773	23006712	1553584	1556664
scaffold117_size639039	chr9	+	639039	563959	599097	23006712	170287	2010992
scaffold672_size109657	chr9	+	109657	51939	53090	23006712	1624937	1626103
scaffold1465_size6264	chr9	+	6264	2792	3943	23006712	1624937	1626103
scaffold1491_size5989	chr9	+	5989	2517	3668	23006712	1624937	1626103
scaffold1495_size5945	chr9	-	5945	2473	3624	23006712	1624937	1626103
scaffold248_size396238	chr9	+	396238	3189	10346	23006712	1675265	1689283
scaffold285_size358112	chr9	+	358112	309012	316169	23006712	1675265	1689283
scaffold531_size179314	chr9	+	179314	3706	10863	23006712	1675265	1689283
scaffold1038_size22408	chr9	-	22408	12062	19219	23006712	1675265	1689283
scaffold170_size519258	chr9	+	519258	244575	244954	23006712	2031493	2031872
scaffold1187_size13460	chr9	+	13460	2852	2912	23006712	3034113	3034333
scaffold819_size56302	chr9	+	56302	13408	14757	23006712	3313238	3314589
scaffold221_size436046	chr9	+	436046	259779	260770	23006712	5201442	5202433
scaffold58_size900371	chr9	+	900371	138707	139756	23006712	5201528	5202576
scaffold470_size212680	chr9	+	212680	59598	59652	23006712	5338158	5338212
scaffold412_size250143	chr9	+	250143	108058	108390	23006712	5850575	5850895
scaffold1383_size7612	chr9	+	7612	6970	7575	23006712	1499083	12394810
scaffold1307_size9241	chr9	-	9241	5725	9221	23006712	6979537	6984097
scaffold198_size466070	chr9	+	466070	317394	322545	23006712	6979537	6986339
scaffold526_size182367	chr9	+	182367	43450	44648	23006712	8345781	8346974
scaffold143_size572353	chr9	+	572353	438775	439797	23006712	8345917	8346974
scaffold606_size133267	chr9	+	133267	41557	42337	23006712	8346110	8346915
scaffold191_size479834	chr9	+	479834	261843	264808	23006712	4281691	17310309
scaffold299_size348511	chr9	+	348511	97496	98488	23006712	5201442	13706079
scaffold113_size644116	chr9	+	644116	17624	24517	23006712	521955	20450604
scaffold580_size143028	chr9	+	143028	3581	3633	23006712	9586658	21427405
scaffold33_size1110170	chr9	+	1110170	231949	813326	23006712	5004602	13332236
scaffold381_size276415	chr9	+	276415	44443	48385	23006712	5004602	13286793
scaffold566_size152642	chr9	+	152642	31813	31879	23006712	10318320	21427419
scaffold63_size858018	chr9	+	858018	352941	768315	23006712	8345835	19482153
scaffold83_size766868	chr9	+	766868	50479	710320	23006712	9151733	22473911
scaffold361_size292200	chr9	+	292200	80914	81671	23006712	6311778	18945660
scaffold678_size107199	chr9	+	107199	88580	91579	23006712	16752249	16755322
scaffold689_size99217	chr9	+	99217	3922	6808	23006712	16752535	16755510
scaffold900_size37806	chr9	-	37806	11244	14130	23006712	16752535	16755510
scaffold1175_size14255	chr9	+	14255	6067	9988	23006712	7754313	20450604
scaffold109_size652032	chr9	+	652032	163068	166845	23006712	17079069	17082822
scaffold135_size590554	chr9	+	590554	71070	74848	23006712	17079069	17082822
scaffold228_size428413	chr9	+	428413	74525	77046	23006712	17080292	17082869
scaffold335_size320703	chr9	+	320703	269348	271577	23006712	12556591	21745417
scaffold185_size485439	chr9	+	485439	392197	397242	23006712	10520930	20449208
scaffold530_size179357	chr9	+	179357	73616	136952	23006712	1540888	21773865
scaffold527_size181175	chr9	+	181175	146142	163800	23006712	17082386	21655546
scaffold41_size1047198	chr9	+	1047198	109562	110878	23006712	19920973	19922249
scaffold75_size815677	chr9	+	815677	190661	651561	23006712	1906822	21982003
scaffold77_size793173	chr9	+	793173	402785	404625	23006712	20447387	20449208
scaffold48_size992202	chr9	+	992202	192558	665584	23006712	1576331	21020498
scaffold562_size155008	chr9	+	155008	4860	121278	23006712	772177	22857667
scaffold47_size1002735	chr9	+	1002735	372807	580864	23006712	772177	22909503
scaffold496_size198102	chr9	+	198102	168788	169161	23006712	22857399	22857790
scaffold753_size76750	chr9	+	76750	291	1312	23006712	22901392	22902413
scaffold340_size317973	chrUn	+	317973	155647	169826	43154196	1098334	1107307
scaffold541_size172255	chrUn	+	172255	34939	47439	43154196	1098488	1122794
scaffold466_size215351	chrUn	+	215351	58109	59843	43154196	4835653	4837405
scaffold153_size555728	chrUn	+	555728	404686	407029	43154196	5286738	5289135
scaffold833_size52258	chrUn	+	52258	42118	42162	43154196	5418074	5418139
scaffold1073_size19364	chrUn	+	19364	3558	3602	43154196	5418074	5418139
scaffold246_size398760	chrUn	+	398760	9760	19827	43154196	7467786	7479295
scaffold788_size64895	chrUn	+	64895	8774	52064	43154196	7467786	40281305
scaffold114_size641222	chrUn	+	641222	280038	280483	43154196	9700397	9700909
scaffold635_size123795	chrUn	+	123795	99995	113909	43154196	5286738	37952328
scaffold887_size41067	chrUn	+	41067	17196	18985	43154196	10550876	10552691
scaffold1240_size10973	chrUn	+	10973	7996	8197	43154196	10596232	10596421
scaffold177_size501284	chrUn	+	501284	312324	349935	43154196	10465926	25828640
scaffold764_size73013	chrUn	+	73013	54426	56402	43154196	11092299	11092380
scaffold32_size1119335	chrUn	+	1119335	189283	758543	43154196	1134033	28913766
scaffold280_size365250	chrUn	+	365250	226883	227670	43154196	11897122	11897909
scaffold245_size399718	chrUn	+	399718	236293	237981	43154196	12628150	12629862
scaffold918_size34464	chrUn	+	34464	5377	5466	43154196	14014231	14014320
scaffold81_size768935	chrUn	+	768935	138837	523196	43154196	12628088	30801610
scaffold288_size356667	chrUn	+	356667	45173	46660	43154196	14922835	14924468
scaffold479_size206789	chrUn	+	206789	187255	191261	43154196	7365242	16073476
scaffold763_size73130	chrUn	+	73130	51273	51370	43154196	17127262	17127359
scaffold544_size169404	chrUn	+	169404	58037	58164	43154196	17829164	17829292
scaffold73_size822997	chrUn	+	822997	525360	759973	43154196	11936769	19181772
scaffold781_size66705	chrUn	+	66705	55719	57751	43154196	10895001	27579811
scaffold443_size229734	chrUn	+	229734	22892	26344	43154196	19177689	19181114
scaffold406_size255187	chrUn	+	255187	220146	220954	43154196	21174553	21175361
scaffold990_size26292	chrUn	+	26292	9	297	43154196	22810821	22811152
scaffold384_size274972	chrUn	+	274972	60947	63370	43154196	23033249	23035681
scaffold314_size338820	chrUn	+	338820	52651	53525	43154196	23345316	23346190
scaffold141_size577029	chrUn	+	577029	475190	476943	43154196	12628088	34069227
scaffold276_size366521	chrUn	+	366521	325017	326771	43154196	12628088	34069227
scaffold468_size213067	chrUn	+	213067	177993	179747	43154196	12628088	34069227
scaffold499_size197483	chrUn	+	197483	39201	40956	43154196	12628088	34069227
scaffold212_size444446	chrUn	+	444446	121528	208794	43154196	12628088	34069227
scaffold37_size1057303	chrUn	+	1057303	270493	359347	43154196	1165445	42419993
scaffold579_size144847	chrUn	+	144847	74752	74996	43154196	27182330	27182574
scaffold171_size516701	chrUn	+	516701	126244	126840	43154196	27731108	27731704
scaffold336_size320595	chrUn	+	320595	272698	282773	43154196	18961850	30801610
scaffold419_size248360	chrUn	+	248360	22941	23790	43154196	30799766	30801219
scaffold691_size98172	chrUn	+	98172	59258	59869	43154196	32351623	32352246
scaffold362_size289980	chrUn	+	289980	189988	192342	43154196	32750762	32753112
scaffold82_size768308	chrUn	+	768308	457277	459032	43154196	34067448	34069227
scaffold657_size115252	chrUn	+	115252	61297	61592	43154196	35277814	35278112
scaffold711_size92162	chrUn	+	92162	64073	64139	43154196	35239455	35652379
scaffold150_size559803	chrUn	+	559803	24453	299115	43154196	29687285	37949488
scaffold20_size1366081	chrUn	+	1366081	65598	241019	43154196	34389488	38701357
scaffold85_size755756	chrUn	+	755756	723116	725174	43154196	38699296	38701357
scaffold590_size139453	chrUn	+	139453	3197	6707	43154196	39435587	39439103
scaffold493_size200783	chrUn	+	200783	164609	164665	43154196	39500123	39699529
scaffold650_size116903	chrUn	+	116903	2015	68932	43154196	41671831	42502417
scaffold151_size559051	chrUn	+	559051	363347	397339	43154196	23703845	42881251

## Sheet: Urenif Vs Slycopersicum
Query	Target	Strand	Q-len	Q-start	Q-stop	T-len	T-start	T-stop
scaffold1361_size8112	SL3.0ch00	+	8112	5454	5539	20852292	4197402	4197487
scaffold250_size394352	SL3.0ch00	+	394352	374296	381911	20852292	5631068	7588593
scaffold360_size294240	SL3.0ch00	+	294240	22107	38554	20852292	5655711	13555090
scaffold26_size1224954	SL3.0ch00	+	1224954	380403	382838	20852292	7586973	8440372
scaffold11_size1489916	SL3.0ch00	+	1489916	921258	922697	20852292	4197019	13555175
scaffold12_size1484567	SL3.0ch00	+	1484567	975891	1120851	20852292	7583114	20760637
scaffold148_size560834	SL3.0ch00	+	560834	334595	385069	20852292	5631018	9132368
scaffold404_size257756	SL3.0ch00	+	257756	92875	93161	20852292	5655978	13555120
scaffold230_size422617	SL3.0ch00	+	422617	53835	57902	20852292	7583727	13554612
scaffold1217_size11707	SL3.0ch00	+	11707	5177	5274	20852292	10856296	10856393
scaffold336_size320595	SL3.0ch00	+	320595	272698	282773	20852292	9725935	15686192
scaffold419_size248360	SL3.0ch00	+	248360	22941	23790	20852292	9727167	15684967
scaffold640_size121989	SL3.0ch00	+	121989	9068	21409	20852292	11062308	15445042
scaffold431_size238522	SL3.0ch00	+	238522	90028	90605	20852292	13693139	17213353
scaffold212_size444446	SL3.0ch00	+	444446	121528	121596	20852292	15685453	15685525
scaffold590_size139453	SL3.0ch00	+	139453	127259	127836	20852292	13693139	20760637
scaffold78_size780330	SL3.0ch00	+	780330	8114	12088	20852292	3377027	18986664
scaffold628_size126813	SL3.0ch01	+	126813	42498	43189	98455869	936839	937561
scaffold86_size753315	SL3.0ch01	+	753315	639255	648860	98455869	987126	1001676
scaffold237_size412359	SL3.0ch01	+	412359	333800	351769	98455869	987126	90289197
scaffold317_size334483	SL3.0ch01	+	334483	21289	54956	98455869	1666133	1666853
scaffold1072_size19431	SL3.0ch01	+	19431	10221	12058	98455869	1722776	1724534
scaffold904_size37068	SL3.0ch01	+	37068	3531	4155	98455869	2742117	2742686
scaffold755_size76505	SL3.0ch01	+	76505	36771	36857	98455869	2819673	2819762
scaffold439_size236221	SL3.0ch01	+	236221	97419	198590	98455869	5035646	77108096
scaffold405_size257100	SL3.0ch01	+	257100	5816	5888	98455869	8634458	8634530
scaffold726_size87774	SL3.0ch01	+	87774	81886	81958	98455869	8634458	8634530
scaffold563_size154924	SL3.0ch01	+	154924	24233	25010	98455869	9785912	13501399
scaffold617_size128661	SL3.0ch01	+	128661	35647	59300	98455869	16991375	93371258
scaffold63_size858018	SL3.0ch01	+	858018	260355	269475	98455869	19718817	20056564
scaffold43_size1025288	SL3.0ch01	+	1025288	326606	808778	98455869	15086605	50732716
scaffold565_size154525	SL3.0ch01	+	154525	90727	90954	98455869	13955698	29158593
scaffold458_size221370	SL3.0ch01	+	221370	64978	65159	98455869	23878192	28555134
scaffold79_size776185	SL3.0ch01	+	776185	49338	51308	98455869	26761984	26764019
scaffold154_size551747	SL3.0ch01	+	551747	359866	370691	98455869	23877696	27925448
scaffold20_size1366081	SL3.0ch01	+	1366081	155776	337657	98455869	24584399	70989082
scaffold191_size479834	SL3.0ch01	+	479834	67078	264336	98455869	18846989	75548036
scaffold92_size718879	SL3.0ch01	+	718879	498272	505190	98455869	32703631	32710637
scaffold205_size458316	SL3.0ch01	+	458316	403418	421625	98455869	32847303	32857982
scaffold386_size274479	SL3.0ch01	+	274479	39477	81082	98455869	32847640	32868895
scaffold46_size1006163	SL3.0ch01	+	1006163	409946	1005546	98455869	32847209	82325646
scaffold442_size230434	SL3.0ch01	+	230434	89526	90821	98455869	23210390	43272855
scaffold90_size731574	SL3.0ch01	+	731574	710403	713789	98455869	44118841	44122259
scaffold51_size953629	SL3.0ch01	+	953629	586374	588478	98455869	44651412	44653521
scaffold21_size1333958	SL3.0ch01	+	1333958	410337	1253641	98455869	44119465	96192193
scaffold1_size1862935	SL3.0ch01	+	1862935	668113	1835207	98455869	4794450	95288930
scaffold566_size152642	SL3.0ch01	+	152642	31812	31879	98455869	5224283	90992798
scaffold550_size162924	SL3.0ch01	+	162924	143144	154257	98455869	26761984	63811320
scaffold489_size201961	SL3.0ch01	+	201961	40275	40964	98455869	57201469	57202163
scaffold184_size485503	SL3.0ch01	+	485503	295475	427357	98455869	441113	59832586
scaffold28_size1211183	SL3.0ch01	+	1211183	260262	801205	98455869	23799993	63811925
scaffold27_size1214473	SL3.0ch01	+	1214473	94929	762144	98455869	63615243	97096818
scaffold150_size559803	SL3.0ch01	+	559803	21808	513123	98455869	64496422	81554161
scaffold675_size109163	SL3.0ch01	+	109163	73702	74050	98455869	66781206	66781552
scaffold612_size132011	SL3.0ch01	+	132011	62939	63572	98455869	67690011	67690642
scaffold449_size226149	SL3.0ch01	+	226149	163447	165552	98455869	59027064	78096223
scaffold810_size58437	SL3.0ch01	+	58437	27135	27413	98455869	68893274	68893558
scaffold540_size172311	SL3.0ch01	+	172311	115462	126647	98455869	69220176	69221847
scaffold296_size349755	SL3.0ch01	+	349755	20123	22699	98455869	64497924	74164533
scaffold781_size66705	SL3.0ch01	+	66705	55432	57744	98455869	64498243	74164533
scaffold113_size644116	SL3.0ch01	+	644116	275123	279574	98455869	70820892	74164533
scaffold144_size572261	SL3.0ch01	+	572261	128601	311008	98455869	69389990	96994627
scaffold274_size368324	SL3.0ch01	+	368324	269634	271129	98455869	73531801	73533315
scaffold423_size245578	SL3.0ch01	+	245578	51530	53858	98455869	73531801	73534145
scaffold32_size1119335	SL3.0ch01	+	1119335	96523	301695	98455869	70816660	94770671
scaffold141_size577029	SL3.0ch01	+	577029	185595	265093	98455869	3717583	77539868
scaffold312_size339379	SL3.0ch01	+	339379	265882	266179	98455869	79138893	79139190
scaffold558_size158525	SL3.0ch01	+	158525	95422	96332	98455869	79816001	79816914
scaffold951_size30028	SL3.0ch01	-	30028	18127	19755	98455869	80590291	80591873
scaffold1172_size14410	SL3.0ch01	+	14410	1675	2008	98455869	79693587	81625085
scaffold562_size155008	SL3.0ch01	+	155008	29462	128735	98455869	81201552	84713032
scaffold241_size405056	SL3.0ch01	+	405056	21182	226197	98455869	83403539	90767816
scaffold22_size1326342	SL3.0ch01	+	1326342	66002	214070	98455869	83785493	86211324
scaffold502_size196668	SL3.0ch01	+	196668	170739	172550	98455869	84320093	84321942
scaffold770_size71031	SL3.0ch01	+	71031	65063	65119	98455869	84493698	84493754
scaffold1640_size3190	SL3.0ch01	+	3190	242	316	98455869	84532664	84532738
scaffold394_size268910	SL3.0ch01	+	268910	90356	91138	98455869	84677715	84678471
scaffold729_size86916	SL3.0ch01	+	86916	1862	70930	98455869	3837827	85494923
scaffold570_size149786	SL3.0ch01	+	149786	116497	127612	98455869	85100947	86211324
scaffold521_size184735	SL3.0ch01	+	184735	29842	31229	98455869	85786771	85788230
scaffold519_size185338	SL3.0ch01	+	185338	52639	175662	98455869	4344356	97278062
scaffold629_size126420	SL3.0ch01	+	126420	32415	37535	98455869	86571817	86576943
scaffold424_size243908	SL3.0ch01	+	243908	99082	181674	98455869	84532664	91767433
scaffold564_size154702	SL3.0ch01	+	154702	136148	136392	98455869	87387915	87388159
scaffold577_size145990	SL3.0ch01	+	145990	10083	60778	98455869	66780890	90797715
scaffold226_size429880	SL3.0ch01	+	429880	364500	364812	98455869	87743923	87744246
scaffold1123_size16487	SL3.0ch01	+	16487	9058	9370	98455869	87743923	87744246
scaffold745_size79788	SL3.0ch01	+	79788	7268	17593	98455869	87880979	96446577
scaffold359_size295461	SL3.0ch01	+	295461	275886	277384	98455869	88571330	88572846
scaffold155_size543531	SL3.0ch01	+	543531	34758	73516	98455869	88570919	93371258
scaffold346_size309305	SL3.0ch01	+	309305	93881	198416	98455869	52583549	93326692
scaffold116_size639307	SL3.0ch01	+	639307	246144	266521	98455869	43197165	89283481
scaffold499_size197483	SL3.0ch01	+	197483	138304	138684	98455869	89387569	89388005
scaffold691_size98172	SL3.0ch01	+	98172	92998	93324	98455869	90438498	90438793
scaffold1150_size15268	SL3.0ch01	+	15268	8926	9112	98455869	90438607	90438793
scaffold430_size239863	SL3.0ch01	+	239863	53842	62459	98455869	90617462	90633734
scaffold750_size77980	SL3.0ch01	+	77980	66569	68451	98455869	91175182	91177125
scaffold351_size304134	SL3.0ch01	+	304134	54147	279429	98455869	4513210	92861731
scaffold309_size341406	SL3.0ch01	+	341406	8004	8646	98455869	91956400	91957101
scaffold876_size43045	SL3.0ch01	+	43045	11668	13567	98455869	92001176	92003072
scaffold1462_size6324	SL3.0ch01	+	6324	3281	5180	98455869	92001176	92003072
scaffold257_size385841	SL3.0ch01	+	385841	107155	256646	98455869	3242782	92314117
scaffold186_size484970	SL3.0ch01	+	484970	70997	124492	98455869	32848277	95528849
scaffold105_size659173	SL3.0ch01	+	659173	583691	594751	98455869	92292676	92654924
scaffold501_size196671	SL3.0ch01	+	196671	50075	50865	98455869	91979141	92937425
scaffold858_size45924	SL3.0ch01	+	45924	41208	41296	98455869	92452588	93441217
scaffold75_size815677	SL3.0ch01	+	815677	787526	789925	98455869	93141197	93143595
scaffold236_size412999	SL3.0ch01	+	412999	103954	144094	98455869	61700728	94975622
scaffold335_size320703	SL3.0ch01	+	320703	291941	292723	98455869	95298802	95299678
scaffold862_size45560	SL3.0ch01	+	45560	41978	42760	98455869	95298802	95299678
scaffold363_size289583	SL3.0ch01	+	289583	79171	267716	98455869	3035388	97944107
scaffold580_size143028	SL3.0ch01	+	143028	3581	8750	98455869	5224284	96823797
scaffold498_size197487	SL3.0ch01	+	197487	80675	127679	98455869	94112297	97575977
scaffold169_size519396	SL3.0ch01	+	519396	223964	338028	98455869	90407483	96774901
scaffold279_size365527	SL3.0ch01	+	365527	244990	246435	98455869	96682465	96684314
scaffold797_size62438	SL3.0ch01	+	62438	31721	33223	98455869	90992732	96823797
scaffold427_size242665	SL3.0ch01	+	242665	164888	235058	98455869	97060902	97634463
scaffold328_size323540	SL3.0ch01	+	323540	161171	161673	98455869	97391706	97392208
scaffold557_size158656	SL3.0ch01	+	158656	156748	156789	98455869	97415721	97415762
scaffold829_size53678	SL3.0ch01	+	53678	47427	47468	98455869	97415721	97415762
scaffold1187_size13460	SL3.0ch01	+	13460	2852	12729	98455869	95567008	97495534
scaffold337_size319475	SL3.0ch01	+	319475	302306	303651	98455869	97470837	97472209
scaffold585_size141312	SL3.0ch01	+	141312	110358	110621	98455869	97471878	97472141
scaffold567_size152524	SL3.0ch01	+	152524	9097	9518	98455869	97495113	97495534
scaffold243_size401479	SL3.0ch01	+	401479	79010	79696	98455869	97887561	97888247
scaffold125_size608205	SL3.0ch02	+	608205	162672	406684	55977580	2431899	46472755
scaffold145_size568489	SL3.0ch02	+	568489	137008	139484	55977580	14177550	14180129
scaffold83_size766868	SL3.0ch02	+	766868	306862	320447	55977580	14182690	14190773
scaffold45_size1012159	SL3.0ch02	+	1012159	36342	930145	55977580	22103118	55301737
scaffold208_size452143	SL3.0ch02	+	452143	431724	431899	55977580	22369953	22370128
scaffold176_size503880	SL3.0ch02	+	503880	224281	225392	55977580	22369953	22371079
scaffold122_size611765	SL3.0ch02	+	611765	158394	233781	55977580	22864300	27145055
scaffold270_size371520	SL3.0ch02	+	371520	196568	360926	55977580	18034644	34556261
scaffold1203_size12743	SL3.0ch02	+	12743	2510	4132	55977580	25734050	25734326
scaffold198_size466070	SL3.0ch02	+	466070	204208	210576	55977580	25948233	25954569
scaffold364_size288414	SL3.0ch02	+	288414	219478	221241	55977580	26818150	26819944
scaffold199_size465929	SL3.0ch02	+	465929	195647	195972	55977580	27144731	27145055
scaffold399_size263046	SL3.0ch02	+	263046	148100	148425	55977580	27144731	27145055
scaffold575_size147595	SL3.0ch02	+	147595	137229	137554	55977580	27144731	27145055
scaffold715_size91413	SL3.0ch02	+	91413	58659	58984	55977580	27144731	27145055
scaffold598_size135460	SL3.0ch02	+	135460	79913	80813	55977580	29373132	29374011
scaffold495_size198985	SL3.0ch02	+	198985	168539	172043	55977580	25726967	32794122
scaffold219_size438390	SL3.0ch02	+	438390	96283	99003	55977580	22369953	30348452
scaffold101_size679088	SL3.0ch02	+	679088	62945	65667	55977580	30345718	30348452
scaffold175_size507515	SL3.0ch02	+	507515	369553	374137	55977580	31896595	32794122
scaffold780_size67079	SL3.0ch02	+	67079	7381	8451	55977580	37877453	37878523
scaffold649_size118696	SL3.0ch02	+	118696	109670	109975	55977580	38320234	38320539
scaffold579_size144847	SL3.0ch02	+	144847	129702	129974	55977580	38803373	38803670
scaffold711_size92162	SL3.0ch02	+	92162	76017	77899	55977580	38840727	38842602
scaffold856_size46335	SL3.0ch02	+	46335	42335	42685	55977580	39624087	39624474
scaffold408_size254463	SL3.0ch02	+	254463	206151	207330	55977580	39624087	39639481
scaffold286_size357339	SL3.0ch02	+	357339	63719	288898	55977580	38840727	50385860
scaffold600_size134883	SL3.0ch02	+	134883	55343	55658	55977580	39726853	39727176
scaffold901_size37753	SL3.0ch02	+	37753	5210	19827	55977580	40824461	41094161
scaffold503_size196565	SL3.0ch02	+	196565	163755	177577	55977580	41073442	41222328
scaffold120_size617610	SL3.0ch02	+	617610	107750	601864	55977580	41073442	50811723
scaffold91_size726399	SL3.0ch02	+	726399	209882	702691	55977580	35685472	43554638
scaffold397_size264925	SL3.0ch02	+	264925	86538	87392	55977580	41995216	41996088
scaffold883_size41640	SL3.0ch02	+	41640	3774	5511	55977580	43458267	43459971
scaffold107_size656107	SL3.0ch02	+	656107	225583	226642	55977580	43747524	43748611
scaffold388_size273501	SL3.0ch02	+	273501	187353	228714	55977580	43848188	50811716
scaffold524_size182843	SL3.0ch02	+	182843	60042	65333	55977580	38089021	50850455
scaffold117_size639039	SL3.0ch02	+	639039	28947	584517	55977580	45482203	54015509
scaffold306_size343137	SL3.0ch02	+	343137	189234	189413	55977580	45701982	45702163
scaffold978_size26980	SL3.0ch02	-	26980	23071	24445	55977580	45810390	45811803
scaffold1337_size8463	SL3.0ch02	-	8463	2341	2963	55977580	45872116	45872765
scaffold350_size304998	SL3.0ch02	+	304998	229241	230023	55977580	46020079	46020895
scaffold447_size226588	SL3.0ch02	+	226588	123149	137787	55977580	46172816	46173856
scaffold774_size69362	SL3.0ch02	+	69362	32331	33220	55977580	47034623	47035512
scaffold669_size110238	SL3.0ch02	+	110238	55517	58079	55977580	47346448	47349028
scaffold597_size137995	SL3.0ch02	-	137995	104438	135783	55977580	7400752	47717035
scaffold757_size75512	SL3.0ch02	+	75512	5347	22752	55977580	47701604	47717035
scaffold992_size26005	SL3.0ch02	+	26005	5347	22752	55977580	47701604	47717035
scaffold355_size298094	SL3.0ch02	+	298094	136417	136533	55977580	45161419	49881295
scaffold730_size86902	SL3.0ch02	+	86902	26263	27068	55977580	35413806	49043181
scaffold830_size53621	SL3.0ch02	+	53621	8908	9713	55977580	35413806	49043181
scaffold535_size176836	SL3.0ch02	+	176836	1529	1730	55977580	48924129	48924330
scaffold1246_size10845	SL3.0ch02	+	10845	3436	3637	55977580	48924129	48924330
scaffold1075_size19277	SL3.0ch02	+	19277	11256	11376	55977580	49040684	49040801
scaffold725_size88532	SL3.0ch02	+	88532	6206	6277	55977580	49077572	49077640
scaffold838_size51646	SL3.0ch02	+	51646	2471	2929	55977580	49289124	49289582
scaffold999_size25422	SL3.0ch02	+	25422	17278	17347	55977580	49996289	49999068
scaffold253_size390581	SL3.0ch02	+	390581	272650	276560	55977580	50922307	50926182
scaffold174_size508446	SL3.0ch02	+	508446	348337	484436	55977580	49996289	51071489
scaffold162_size531800	SL3.0ch02	+	531800	100768	143282	55977580	37909565	51647170
scaffold354_size300507	SL3.0ch02	+	300507	110454	119042	55977580	51766778	51777725
scaffold775_size68853	SL3.0ch02	+	68853	11576	11678	55977580	54235752	54235854
scaffold852_size47091	SL3.0ch02	+	47091	43692	43839	55977580	54765430	54765577
scaffold1241_size10950	SL3.0ch02	+	10950	7551	7698	55977580	54765430	54765577
scaffold448_size226196	SL3.0ch02	+	226196	94942	95012	55977580	55021728	55021798
scaffold1119_size16554	SL3.0ch02	+	16554	3050	3120	55977580	55021728	55021798
scaffold849_size47571	SL3.0ch02	+	47571	11501	11706	55977580	55074417	55074622
scaffold471_size212349	SL3.0ch02	+	212349	7022	8242	55977580	55204257	55205501
scaffold735_size82422	SL3.0ch03	+	82422	74516	74599	72290146	518373	4334432
scaffold1041_size21800	SL3.0ch03	+	21800	19119	19452	72290146	2213929	2214262
scaffold216_size441981	SL3.0ch03	+	441981	57598	382336	72290146	2411407	7202864
scaffold820_size56079	SL3.0ch03	+	56079	34335	35800	72290146	3248630	3248677
scaffold893_size39817	SL3.0ch03	+	39817	33399	33613	72290146	4487798	4488063
scaffold822_size54770	SL3.0ch03	+	54770	22850	23466	72290146	4661440	4662128
scaffold194_size468989	SL3.0ch03	+	468989	185384	188218	72290146	5380738	5382014
scaffold1130_size16129	SL3.0ch03	-	16129	4865	6850	72290146	8630078	8632067
scaffold177_size501284	SL3.0ch03	+	501284	346272	348266	72290146	10807805	11010698
scaffold69_size841560	SL3.0ch03	+	841560	212134	577599	72290146	10807805	53782633
scaffold484_size203314	SL3.0ch03	+	203314	175656	179453	72290146	7202431	11328541
scaffold857_size46234	SL3.0ch03	+	46234	7349	8226	72290146	11327977	11328850
scaffold95_size706132	SL3.0ch03	+	706132	354718	361512	72290146	12821649	12830889
scaffold414_size249511	SL3.0ch03	+	249511	238483	245277	72290146	12821649	12830889
scaffold878_size42927	SL3.0ch03	+	42927	30651	35530	72290146	11928775	18348711
scaffold159_size538032	SL3.0ch03	+	538032	250393	251900	72290146	18347384	18348711
scaffold664_size111833	SL3.0ch03	+	111833	48526	53096	72290146	18347384	18348711
scaffold1382_size7624	SL3.0ch03	-	7624	1413	2924	72290146	18347384	18348711
scaffold132_size599623	SL3.0ch03	+	599623	140838	141219	72290146	18663023	18663397
scaffold251_size391187	SL3.0ch03	+	391187	51579	141319	72290146	11554695	67437057
scaffold14_size1455245	SL3.0ch03	+	1455245	638588	811214	72290146	18478327	52794378
scaffold35_size1080921	SL3.0ch03	+	1080921	258330	493114	72290146	5789664	60764562
scaffold517_size186048	SL3.0ch03	+	186048	166941	167797	72290146	22670003	22670859
scaffold276_size366521	SL3.0ch03	+	366521	315645	316639	72290146	22711910	22712891
scaffold410_size252252	SL3.0ch03	+	252252	170093	172600	72290146	22711910	25949052
scaffold493_size200783	SL3.0ch03	+	200783	164609	164664	72290146	3201224	59089943
scaffold819_size56302	SL3.0ch03	-	56302	41518	43657	72290146	25200393	51631736
scaffold368_size285942	SL3.0ch03	+	285942	76189	104247	72290146	11553449	55047776
scaffold409_size254044	SL3.0ch03	+	254044	206249	214928	72290146	11997143	43638178
scaffold625_size127502	SL3.0ch03	+	127502	29453	29880	72290146	35363912	35365406
scaffold211_size447269	SL3.0ch03	+	447269	222104	223146	72290146	36328735	36329799
scaffold25_size1264610	SL3.0ch03	+	1264610	2705	181360	72290146	7202431	39548046
scaffold258_size385168	SL3.0ch03	+	385168	263480	264310	72290146	38015207	38016037
scaffold434_size237078	SL3.0ch03	+	237078	184792	186677	72290146	39546193	39548046
scaffold509_size189280	SL3.0ch03	+	189280	88154	90555	72290146	43635752	43638178
scaffold242_size401956	SL3.0ch03	+	401956	209956	211870	72290146	43636241	43638178
scaffold319_size334000	SL3.0ch03	+	334000	208446	210360	72290146	43636241	43638178
scaffold599_size134888	SL3.0ch03	-	134888	64576	71511	72290146	44050545	44057475
scaffold765_size72457	SL3.0ch03	+	72457	6511	52555	72290146	2213929	54237259
scaffold1108_size16952	SL3.0ch03	+	16952	13696	15124	72290146	47714386	47715799
[truncated: 1,597 more rows]

## Sheet: Ugibba Vs Athaliana
Query	Target	Strand	Q-len	Q-start	Q-stop	T-len	T-start	T-stop
[truncated: 516 more rows]

## Sheet: Ugibba Vs Vvinifera
Query	Target	Strand	Q-len	Q-start	Q-stop	T-len	T-start	T-stop
[truncated: 516 more rows]

[truncated: 1 more sheets: Ugibba Vs Slycopersicum]
