# Supplementary material for: The Terrestrial Carnivorous Plant Utricularia reniformis Sheds Light on Environmental and Life-Form Genome Plasticity
Source: Int J Mol Sci. 2019 Dec 18;21(1):3. doi: 10.3390/ijms21010003 (PMC6982007; doi:10.3390/ijms21010003)
Supplement: Supplementary file 1 [file ijms-21-00003-s001.zip › Supplementary_tableS7.xls]

## Sheet: Urenif SINGLETONS
Tags	GO ID	GO Name	GO Category	FDR	P-Value	Nr Test	Nr Reference	Non Annot Test	Non Annot Reference
[OVER]	GO:0015979	photosynthesis	BIOLOGICAL_PROCESS	0.0038752233479578896	3.9950756164514327E-4	28	249	1373	26101
TEST	evm.model.scaffold637_size123618.7	Putative mog1/PsbP/DUF1795-like photosystem II reaction center PsbP family protein-like	noEC	J	AT5G27390.1	tagatose-6-phosphate_ketose/aldose_isomerase%2C_putative_(Mog1/PsbP/DUF1795-like_photosystem_II_reaction_center_PsbP_family_protein)
TEST	evm.model.scaffold606_size133267.11	palmitoyl-monogalactosyldiacylglycerol delta-7 desaturase, chloroplastic-like	EC:1.14.19.1;EC:1.14.19	I	AT3G15850.1	fatty_acid_desaturase_5
TEST	evm.model.scaffold594_size138683.5	psbP domain-containing protein 5, chloroplastic	noEC	S	AT5G11450.2	PsbP_domain_protein_(Mog1/PsbP/DUF1795-like_photosystem_II_reaction_center_PsbP_family_protein)
TEST	evm.model.scaffold574_size148320.10	Photosystem II reaction center Psb28 protein	noEC	S	AT4G28660.1	photosystem_II_reaction_center_PSB28_protein
TEST	evm.model.scaffold481_size205178.8	photosystem II repair protein PSB27-H1, chloroplastic	noEC	S	AT1G03600.1	photosystem_II_family_protein
TEST	evm.model.scaffold478_size208472.28	Tetratricopeptide-like helical	noEC	S	AT1G22700.2	Tetratricopeptide_repeat_(TPR)-like_superfamily_protein
TEST	evm.model.scaffold461_size219499.8	PGR5-like protein 1B, chloroplastic isoform X1	noEC	S	AT5G59400.1	PGR5-like_A_protein
TEST	evm.model.scaffold332_size321420.84	Os11g0242400 protein	EC:1.7.1.4	P	AT1G71500.1	Rieske_(2Fe-2S)_domain-containing_protein
TEST	evm.model.scaffold293_size352734.27	2-carboxy-1,4-naphthoquinone phytyltransferase, chloroplastic-like	noEC	H	AT1G60600.2	UbiA_prenyltransferase_family_protein
TEST	evm.model.scaffold285_size358112.79	Putative RNA binding protein	noEC	S	AT3G08010.1	RNA_binding_protein
TEST	evm.model.scaffold243_size401479.61	Chloroplast sensor kinase, chloroplastic	EC:2.7.13.3	T	AT1G67840.1	chloroplast_sensor_kinase
TEST	evm.model.scaffold240_size406237.33	NADH dehydrogenase subunit B (Fragment)	EC:7.1.1.2;EC:1.6.99.5;EC:1.6.99.3	C	ATCG01250.1	NADH-quinone_oxidoreductase_protein
TEST	evm.model.scaffold155_size543531.49	prolyl-tRNA synthetase associated domain-containing protein 1	EC:3.1.1.1	S	AT1G44835.1	YbaK/aminoacyl-tRNA_synthetase-associated_domain-containing_protein
TEST	evm.model.scaffold144_size572261.144	UPF0603 protein At1g54780, chloroplastic	EC:3.1.3.2	S	AT1G54780.1	thylakoid_lumen_18.3_kDa_protein
TEST	evm.model.scaffold132_size599623.44	Photosystem I assembly protein Ycf4	noEC	S	ATCG00520.1	unfolded_protein_binding_protein
TEST	evm.model.scaffold131_size602077.68	Cytochrome c6, chloroplastic	noEC	C	AT5G45040.1	Cytochrome_c
TEST	evm.model.scaffold122_size611765.74	Thylakoid lumenal 16.5 kDa protein, chloroplastic	noEC	S	AT4G02530.2	chloroplast_thylakoid_lumen_protein
TEST	evm.model.scaffold104_size664890.141	photosystem I reaction center subunit N, chloroplastic-like	noEC	S	AT5G64040.1	photosystem_I_reaction_center_subunit_PSI-N%2C_chloroplast%2C_putative_/_PSI-N%2C_putative_(PSAN)
TEST	evm.model.scaffold101_size679088.151	Glutamyl-tRNA reductase-binding protein, chloroplastic	noEC	S	AT3G21200.1	proton_gradient_regulation_7
TEST	evm.model.scaffold74_size818217.27	stress enhanced protein 2, chloroplastic	noEC	S	AT2G21970.1	stress_enhanced_protein_2
TEST	evm.model.scaffold61_size863762.37	Photosystem I reaction center subunit XI, chloroplastic	noEC	S	AT4G12800.1	photosystem_I_subunit_l
TEST	evm.model.scaffold56_size905644.70	Photosystem I reaction center subunit VI, chloroplastic	noEC	S	AT1G52230.1	photosystem_I_subunit_H2
TEST	evm.model.scaffold54_size918619.216	protein LOW PSII ACCUMULATION 3, chloroplastic	noEC	S	AT1G73060.1	Low_PSII_Accumulation_3
TEST	evm.model.scaffold48_size992202.156	photosystem I reaction center subunit psaK, chloroplastic	noEC	S	AT1G30380.1	photosystem_I_subunit_K
TEST	evm.model.scaffold46_size1006163.41	Ycf3-interacting protein 1, chloroplastic	noEC	S	AT5G44650.1	death_domain_associated_protein
TEST	evm.model.scaffold34_size1082081.91	Thylakoid lumenal 19 kDa protein, chloroplastic	noEC	S	AT3G63540.1	thylakoid_lumenal_protein_(Mog1/PsbP/DUF1795-like_photosystem_II_reaction_center_PsbP_family_protein)
TEST	evm.model.scaffold21_size1333958.350	Pentatricopeptide repeat-containing protein	noEC	S	AT2G15820.1	endonuclease
TEST	evm.model.scaffold3_size1784162.75	ATP synthase delta chain, chloroplastic	noEC	C	AT4G09650.1	F-type_H+-transporting_ATPase_subunit_delta
REFERENCE	evm.model.scaffold1737_size1665.1	probable GTP diphosphokinase RSH2, chloroplastic	EC:2.7.6.5;EC:3.1.7.2	T	AT1G54130.1	RELA/SPOT_homolog_3
REFERENCE	evm.model.scaffold1528_size5622.2	Phosphoglycerate kinase	EC:2.7.2.3	G	AT1G56190.1	Phosphoglycerate_kinase_family_protein
REFERENCE	evm.model.scaffold1524_size5672.1	Chlorophyll a-b binding protein, chloroplastic	noEC	C	AT5G01530.1	light_harvesting_complex_photosystem_II
REFERENCE	evm.model.scaffold1440_size6702.1	Protein CURVATURE THYLAKOID 1B, chloroplastic	noEC	S	AT2G46820.2	photosystem_I_P_subunit
REFERENCE	evm.model.scaffold1365_size8052.1	Protein translocase subunit SecA	EC:3.6.1.3;EC:7.4.2.3;EC:7.4.2.4;EC:7.4.2.5;EC:3.6.1.15	U	AT1G21650.2	Preprotein_translocase_SecA_family_protein
REFERENCE	evm.model.scaffold1300_size9405.2	photosystem I reaction center subunit V, chloroplastic-like	noEC	S	AT1G55670.1	photosystem_I_subunit_G
REFERENCE	evm.model.scaffold1292_size9548.1	protein EMBRYO SAC DEVELOPMENT ARREST 3, chloroplastic	EC:1.8.1.8	S	AT2G34860.2	DnaJ/Hsp40_cysteine-rich_domain_superfamily_protein
REFERENCE	evm.model.scaffold1217_size11707.2	Psbp-like protein 1, chloroplastic	noEC	O	AT3G55330.1	PsbP-like_protein_1
REFERENCE	evm.model.scaffold1214_size11807.6	photosystem I reaction center subunit IV A, chloroplastic	noEC	S	AT2G20260.1	photosystem_I_subunit_E-2
REFERENCE	evm.model.scaffold1178_size13989.1	Photosystem II PsbX	noEC	M	AT2G06520.1	photosystem_II_subunit_X
REFERENCE	evm.model.scaffold1156_size14945.1	RNA polymerase sigma factor sigA	noEC	K	AT1G64860.1	sigma_factor_A
REFERENCE	evm.model.scaffold1144_size15427.3	protein SPA, chloroplastic	EC:5.3.4.1	S	AT1G75690.1	DnaJ/Hsp40_cysteine-rich_domain_superfamily_protein
REFERENCE	evm.model.scaffold1141_size15467.3	psbP domain-containing protein 6, chloroplastic	noEC	S	AT3G56650.1	thylakoid_lumenal_protein_(Mog1/PsbP/DUF1795-like_photosystem_II_reaction_center_PsbP_family_protein)
REFERENCE	evm.model.scaffold1123_size16487.3	Proline--tRNA ligase	EC:6.1.1.15	J	AT5G52520.1	Class_II_aaRS_and_biotin_synthetases_superfamily_protein
REFERENCE	evm.model.scaffold1121_size16516.1	probable GTP diphosphokinase RSH2, chloroplastic	EC:2.7.6.5;EC:3.1.7.2	T	AT1G54130.1	RELA/SPOT_homolog_3
REFERENCE	evm.model.scaffold971_size27813.2	Chlorophyll a-b binding protein, chloroplastic	noEC	C	AT3G61470.1	photosystem_I_light_harvesting_complex_protein
REFERENCE	evm.model.scaffold925_size33834.6	Chlorophyll a-b binding protein, chloroplastic	noEC	C	AT3G61470.1	photosystem_I_light_harvesting_complex_protein
REFERENCE	evm.model.scaffold917_size34847.2	Solanesyl diphosphate synthase	EC:2.5.1.29;EC:2.5.1.30;EC:2.5.1.85;EC:2.5.1.84	H	AT1G78510.1	solanesyl_diphosphate_synthase_1
REFERENCE	evm.model.scaffold901_size37753.2	Chlorophyll a-b binding protein, chloroplastic	noEC	C	AT1G29930.1	chlorophyll_A/B_binding_protein_1
REFERENCE	evm.model.scaffold901_size37753.1	Chlorophyll a-b binding protein, chloroplastic	noEC	C	AT1G29930.1	chlorophyll_A/B_binding_protein_1
REFERENCE	evm.model.scaffold884_size41633.1	Photosystem II reaction center PsbP family protein	noEC	S	AT3G05410.1	Photosystem_II_reaction_center_PsbP_family_protein
REFERENCE	evm.model.scaffold841_size49873.10	Chlorophyll a-b binding protein, chloroplastic	noEC	C	AT1G29930.1	chlorophyll_A/B_binding_protein_1
REFERENCE	evm.model.scaffold794_size63128.5	Photosystem I reaction centre subunit N	noEC	none	AT1G49975.1	photosystem_I_reaction_center_subunit_N
REFERENCE	evm.model.scaffold781_size66705.1	Chlorophyll a-b binding protein, chloroplastic	noEC	C	AT1G29930.1	chlorophyll_A/B_binding_protein_1
REFERENCE	evm.model.scaffold774_size69362.15	Ferredoxin--NADP reductase, chloroplastic	EC:1.18.1;EC:1.18.1.2	C	AT1G20020.1	ferredoxin-NADP[+]-oxidoreductase_2
REFERENCE	evm.model.scaffold772_size70005.8	Photosystem II 22 kDa protein, chloroplastic	noEC	C	AT1G44575.3	Chlorophyll_A-B_binding_family_protein
REFERENCE	evm.model.scaffold744_size79833.10	Chlorophyll a-b binding protein, chloroplastic	noEC	P	AT1G29930.1	chlorophyll_A/B_binding_protein_1
REFERENCE	evm.model.scaffold739_size81091.7	Fructose-1,6-bisphosphatase, cytosolic	EC:1.3.1.74;EC:3.1.3.23;EC:3.1.3.11	G	AT1G43670.1	Inositol_monophosphatase_family_protein
REFERENCE	evm.model.scaffold729_size86916.12	K(+) efflux antiporter 2, chloroplastic-like	noEC	P	AT4G00630.1	K+_efflux_antiporter_2
REFERENCE	evm.model.scaffold724_size89489.17	oxygen-evolving enhancer protein 3-2, chloroplastic-like	noEC	S	AT4G05180.2	photosystem_II_subunit_Q-2
REFERENCE	evm.model.scaffold721_size90222.13	protein EMBRYO SAC DEVELOPMENT ARREST 3, chloroplastic	EC:1.8.1.8	S	AT2G34860.2	DnaJ/Hsp40_cysteine-rich_domain_superfamily_protein
REFERENCE	evm.model.scaffold712_size91892.26	Ribulose bisphosphate carboxylase small chain	EC:4.1.1.39	E	AT5G38430.2	Ribulose_bisphosphate_carboxylase_(small_chain)_family_protein
REFERENCE	evm.model.scaffold705_size94633.19	Putative zinc metalloprotease EGY1, chloroplastic	EC:3.4.24	M	AT5G35220.1	Peptidase_M50_family_protein
REFERENCE	evm.model.scaffold694_size97836.26	UPF0187 protein At3g61320, chloroplastic-like	noEC	S	AT3G61320.1	Bestrophin-like_protein
REFERENCE	evm.model.scaffold679_size106169.19	PsbP domain-containing protein 4, chloroplastic	noEC	S	AT1G77090.1	thylakoid_lumenal_protein_(Mog1/PsbP/DUF1795-like_photosystem_II_reaction_center_PsbP_family_protein)
REFERENCE	evm.model.scaffold675_size109163.14	Psbp-like protein 1, chloroplastic	noEC	O	AT3G55330.1	PsbP-like_protein_1
REFERENCE	evm.model.scaffold670_size110176.21	Cytochrome b6-f complex iron-sulfur subunit	EC:1.10.9;EC:1.10.2;EC:1.10.9.1;EC:1.10.2.2	C	AT4G03280.1	photosynthetic_electron_transfer_C
REFERENCE	evm.model.scaffold669_size110238.1	protein LOW PSII ACCUMULATION 3, chloroplastic isoform X2	noEC	S	AT5G48790.1	LOW_PSII_ACCUMULATION_protein_(DUF1995)
REFERENCE	evm.model.scaffold668_size110816.13	Chlorophyll a-b binding protein, chloroplastic	noEC	C	AT1G29930.1	chlorophyll_A/B_binding_protein_1
REFERENCE	evm.model.scaffold668_size110816.12	Chlorophyll a-b binding protein, chloroplastic	noEC	C	AT1G29930.1	chlorophyll_A/B_binding_protein_1
REFERENCE	evm.model.scaffold655_size115805.27	Ferritin	EC:1.16.3.1;EC:1.16.3	P	AT5G01600.1	ferretin_1
REFERENCE	evm.model.scaffold655_size115805.12	probable envelope ADP,ATP carrier protein, chloroplastic	noEC	C	AT3G51870.1	Mitochondrial_substrate_carrier_family_protein
REFERENCE	evm.model.scaffold654_size116285.18	Chlorophyll a-b binding protein, chloroplastic	noEC	C	AT4G10340.1	light_harvesting_complex_of_photosystem_II_5
REFERENCE	evm.model.scaffold647_size119004.23	Cysteine-rich repeat secretory protein 3	noEC	S	AT1G04520.1	plasmodesmata-located_protein_2
REFERENCE	evm.model.scaffold635_size123795.33	Chlorophyll a-b binding protein, chloroplastic	noEC	C	AT5G54270.1	light-harvesting_chlorophyll_B-binding_protein_3
REFERENCE	evm.model.scaffold624_size127768.36	rhodanese-like domain-containing protein 4, chloroplastic	EC:3.2.1.14	S	AT4G01050.1	thylakoid_rhodanese-like_protein
REFERENCE	evm.model.scaffold611_size132032.11	Psbp domain-containing protein 1, chloroplastic	noEC	S	AT4G15510.1	Photosystem_II_reaction_center_PsbP_family_protein
REFERENCE	evm.model.scaffold605_size133348.36	FAD-dependent urate hydroxylase-like	noEC	C	AT4G38540.1	FAD/NAD(P)-binding_oxidoreductase_family_protein
REFERENCE	evm.model.scaffold551_size162907.6	Photosystem i reaction center subunit iv b, chloroplastic	noEC	S	AT2G20260.1	photosystem_I_subunit_E-2
REFERENCE	evm.model.scaffold524_size182843.32	Oxygen-evolving enhancer protein 1, chloroplastic	noEC	S	AT3G50820.1	photosystem_II_subunit_O-2
REFERENCE	evm.model.scaffold524_size182843.28	psbP domain-containing protein 2, chloroplastic	noEC	S	AT2G28605.1	Photosystem_II_reaction_center_PsbP_family_protein
REFERENCE	evm.model.scaffold518_size185628.12	Chlorophyll a-b binding protein, chloroplastic	noEC	C	AT2G34430.1	light-harvesting_chlorophyll-protein_complex_II_subunit_B1
REFERENCE	evm.model.scaffold516_size186372.24	Geranylgeranyl diphosphate reductase, chloroplastic	EC:1.3.1.83	C	AT1G74470.1	Pyridine_nucleotide-disulfide_oxidoreductase_family_protein
REFERENCE	evm.model.scaffold505_size193468.27	Protein translocase subunit SecA	EC:3.6.1.3;EC:7.4.2.3;EC:7.4.2.4;EC:7.4.2.5;EC:3.6.1.15	U	AT1G21650.2	Preprotein_translocase_SecA_family_protein
REFERENCE	evm.model.scaffold503_size196565.25	Chlorophyll a-b binding protein, chloroplastic	noEC	C	AT1G29930.1	chlorophyll_A/B_binding_protein_1
REFERENCE	evm.model.scaffold498_size197487.54	Phosphoglycerate kinase	EC:2.7.2.3;EC:2.1.1.33	G	AT1G56190.2	Phosphoglycerate_kinase_family_protein
REFERENCE	evm.model.scaffold495_size198985.53	PGRL1A transmembrane protein	noEC	S	AT4G22890.4	PGR5-LIKE_A
REFERENCE	evm.model.scaffold488_size202194.33	Electron transport accessory protein-like domain-containing protein	noEC	S	AT2G20260.1	photosystem_I_subunit_E-2
REFERENCE	evm.model.scaffold480_size206361.5	Magnesium-protoporphyrin IX monomethyl ester [oxidative] cyclase, chloroplastic (Fragment)	EC:1.14.13.81;EC:1.14.13	S	AT3G56940.1	dicarboxylate_diiron_protein%2C_putative_(Crd1)
REFERENCE	evm.model.scaffold476_size209410.44	Photosystem II subunit P-1	noEC	C	AT1G06680.1	photosystem_II_subunit_P-1
REFERENCE	evm.model.scaffold476_size209410.3	Protein CURVATURE THYLAKOID 1B, chloroplastic	noEC	S	AT2G46820.2	photosystem_I_P_subunit
REFERENCE	evm.model.scaffold470_size212680.2	rhodanese-like domain-containing protein 4, chloroplastic	EC:3.2.1.14	S	AT4G01050.1	thylakoid_rhodanese-like_protein
REFERENCE	evm.model.scaffold462_size217632.37	protein SPA, chloroplastic	EC:5.3.4.1	S	AT1G75690.1	DnaJ/Hsp40_cysteine-rich_domain_superfamily_protein
REFERENCE	evm.model.scaffold458_size221370.44	Imidazoleglycerol-phosphate dehydratase	EC:4.2.1.19	E	AT3G22425.2	imidazoleglycerol-phosphate_dehydratase
REFERENCE	evm.model.scaffold441_size232911.3	protein ACTIVITY OF BC1 COMPLEX KINASE 1, chloroplastic	EC:7.2.2.2	S	AT4G31390.1	Protein_kinase_superfamily_protein
REFERENCE	evm.model.scaffold439_size236221.43	Geranylgeranyl diphosphate reductase, chloroplastic-like	EC:1.3.1.83	C	AT1G74470.1	Pyridine_nucleotide-disulfide_oxidoreductase_family_protein
REFERENCE	evm.model.scaffold436_size236557.10	Ribulose-phosphate 3-epimerase, chloroplastic	EC:5.1.3.1	G	AT5G61410.2	D-ribulose-5-phosphate-3-epimerase
REFERENCE	evm.model.scaffold432_size238105.3	Glyceraldehyde-3-phosphate dehydrogenase	EC:1.2.1.59;EC:1.2.1.12	G	AT3G26650.1	glyceraldehyde_3-phosphate_dehydrogenase_A_subunit
REFERENCE	evm.model.scaffold424_size243908.17	Peptidylprolyl isomerase	EC:5.2.1.8	O	AT3G60370.1	FKBP-like_peptidyl-prolyl_cis-trans_isomerase_family_protein
REFERENCE	evm.model.scaffold414_size249511.9	NifU-like protein 3, chloroplastic	noEC	O	AT4G25910.1	NFU_domain_protein_3
REFERENCE	evm.model.scaffold412_size250143.40	Pilus biogenesis/stability type IV	noEC	none	AT1G55480.1	protein_containing_PDZ_domain%2C_a_K-box_domain%2C_and_a_TPR_region
REFERENCE	evm.model.scaffold408_size254463.12	GDT1 family protein	noEC	S	AT1G64150.1	Uncharacterized_protein_family_(UPF0016)
REFERENCE	evm.model.scaffold403_size258745.54	Chlorophyll a-b binding protein, chloroplastic	noEC	C	AT3G54890.1	chlorophyll_a-b_binding_protein_6
REFERENCE	evm.model.scaffold403_size258745.7	Putative PDZ domain, Peptidase S1, PA clan, PDZ-like domain protein	noEC	O	AT3G03380.2	DegP_protease_7
REFERENCE	evm.model.scaffold401_size261616.75	Photosystem I reaction center subunit IV A	noEC	S	AT2G20260.1	photosystem_I_subunit_E-2
REFERENCE	evm.model.scaffold366_size288142.3	RNA polymerase sigma factor sigE, chloroplastic/mitochondrial-like	noEC	K	AT5G24120.3	sigma_factor_E
REFERENCE	evm.model.scaffold358_size295937.31	Cytochrome b6-f complex iron-sulfur subunit	EC:1.10.9;EC:1.10.2;EC:1.10.9.1;EC:1.10.2.2	C	AT4G03280.1	photosynthetic_electron_transfer_C
REFERENCE	evm.model.scaffold357_size296716.94	protein LOW PSII ACCUMULATION 3, chloroplastic isoform X2	noEC	S	AT5G48790.1	LOW_PSII_ACCUMULATION_protein_(DUF1995)
REFERENCE	evm.model.scaffold355_size298094.62	ATP synthase gamma chain, chloroplastic	noEC	C	AT4G04640.1	ATPase%2C_F1_complex%2C_gamma_subunit_protein
REFERENCE	evm.model.scaffold351_size304134.89	Tropomyosin like	noEC	none	AT3G15095.1	Serine/Threonine-kinase_pakA-like_protein
REFERENCE	evm.model.scaffold350_size304998.65	Atp-dependent zinc metalloprotease ftsh 2, chloroplastic	EC:3.4.24;EC:3.6.1.3;EC:3.6.1.15;EC:3.6.4.3	O	AT2G30950.4	FtsH_extracellular_protease_family
REFERENCE	evm.model.scaffold348_size306083.36	thioredoxin-like 2, chloroplastic	EC:3.5.1.52	O	AT4G29670.1	atypical_CYS_HIS_rich_thioredoxin_2
REFERENCE	evm.model.scaffold335_size320703.55	Ferredoxin--NADP reductase, chloroplastic	EC:1.18.1;EC:1.18.1.2	C	AT1G20020.1	ferredoxin-NADP[+]-oxidoreductase_2
REFERENCE	evm.model.scaffold334_size320946.81	RNA polymerase sigma factor sigA	noEC	K	AT1G64860.1	sigma_factor_A
REFERENCE	evm.model.scaffold331_size322110.69	Chlorophyll a-b binding protein, chloroplastic	noEC	C	AT1G29930.1	chlorophyll_A/B_binding_protein_1
REFERENCE	evm.model.scaffold331_size322110.68	Chlorophyll a-b binding protein, chloroplastic	noEC	C	AT2G34430.1	light-harvesting_chlorophyll-protein_complex_II_subunit_B1
REFERENCE	evm.model.scaffold323_size325199.24	Photosystem II PsbX	noEC	M	AT2G06520.1	photosystem_II_subunit_X
REFERENCE	evm.model.scaffold322_size332738.22	APO protein 1, chloroplastic	noEC	S	AT1G64810.1	APO_RNA-binding_protein_(DUF794)
REFERENCE	evm.model.scaffold322_size332738.5	Chlorophyll a-b binding protein, chloroplastic	noEC	C	AT1G29930.1	chlorophyll_A/B_binding_protein_1
REFERENCE	evm.model.scaffold321_size333409.7	Chlorophyll a-b binding protein, chloroplastic	noEC	C	AT1G29930.1	chlorophyll_A/B_binding_protein_1
REFERENCE	evm.model.scaffold320_size333601.54	Pilus biogenesis/stability type IV	noEC	none	AT1G55480.1	protein_containing_PDZ_domain%2C_a_K-box_domain%2C_and_a_TPR_region
REFERENCE	evm.model.scaffold317_size334483.33	Photosystem i reaction center subunit iv b, chloroplastic	noEC	S	AT2G20260.1	photosystem_I_subunit_E-2
REFERENCE	evm.model.scaffold312_size339379.81	Putative inactive tRNA-specific adenosine deaminase-like protein 3	noEC	A	AT5G24670.5	Cytidine/deoxycytidylate_deaminase_family_protein
REFERENCE	evm.model.scaffold312_size339379.80	Photosystem II D1 processing protein PSB27-H2, chloroplastic	noEC	S	AT1G05385.2	photosystem_II_11_kDa_protein-like_protein
REFERENCE	evm.model.scaffold306_size343137.49	Pyrophosphate--fructose 6-phosphate 1-phosphotransferase subunit beta	EC:2.7.1.90;EC:2.7.1.11	G	AT1G12000.1	Phosphofructokinase_family_protein
REFERENCE	evm.model.scaffold304_size344087.92	protein THYLAKOID FORMATION1, chloroplastic	noEC	U	AT2G20890.1	photosystem_II_reaction_center_PSB29_protein
REFERENCE	evm.model.scaffold302_size345264.93	APO protein 1, chloroplastic	noEC	S	AT1G64810.1	APO_RNA-binding_protein_(DUF794)
REFERENCE	evm.model.scaffold298_size348755.3	Fructose-1,6-bisphosphatase, chloroplastic	EC:1.3.1.74;EC:3.1.3.23;EC:3.1.3.11	G	AT3G54050.2	high_cyclic_electron_flow_1
REFERENCE	evm.model.scaffold292_size352950.3	Photosystem II reaction center PsbP family protein	noEC	S	AT1G77090.1	thylakoid_lumenal_protein_(Mog1/PsbP/DUF1795-like_photosystem_II_reaction_center_PsbP_family_protein)
REFERENCE	evm.model.scaffold291_size352991.55	Mg-protoporphyrin IX chelatase	EC:6.6.1.1	Z	AT1G08520.1	ALBINA_1
REFERENCE	evm.model.scaffold291_size352991.8	Carbonic anhydrase	EC:4.2.1.1	P	AT5G14740.9	carbonic_anhydrase_2
REFERENCE	evm.model.scaffold280_size365250.89	Chlorophyll a-b binding protein, chloroplastic	noEC	P	AT3G47470.1	light-harvesting_chlorophyll-protein_complex_I_subunit_A4
REFERENCE	evm.model.scaffold279_size365527.11	protein LOW PSII ACCUMULATION 1, chloroplastic	noEC	S	AT1G02910.1	tetratricopeptide_repeat_(TPR)-containing_protein
REFERENCE	evm.model.scaffold276_size366521.9	NifU-like protein 3, chloroplastic	noEC	O	AT4G25910.1	NFU_domain_protein_3
REFERENCE	evm.model.scaffold272_size369917.5	K(+) efflux antiporter 2, chloroplastic-like	noEC	P	AT4G00630.1	K+_efflux_antiporter_2
REFERENCE	evm.model.scaffold269_size371661.47	calvin cycle protein CP12-2, chloroplastic	noEC	S	AT2G47400.1	CP12_domain-containing_protein_1
REFERENCE	evm.model.scaffold266_size374472.2	Chlorophyll a-b binding protein, chloroplastic	noEC	C	AT1G29930.1	chlorophyll_A/B_binding_protein_1
REFERENCE	evm.model.scaffold266_size374472.1	Chlorophyll a-b binding protein, chloroplastic	noEC	C	AT1G29930.1	chlorophyll_A/B_binding_protein_1
REFERENCE	evm.model.scaffold265_size376597.76	Chlorophyll a-b binding protein, chloroplastic (Fragment)	noEC	C	AT1G61520.3	PSI_type_III_chlorophyll_a/b-binding_protein
REFERENCE	evm.model.scaffold265_size376597.75	Chlorophyll a-b binding protein, chloroplastic (Fragment)	noEC	C	AT1G61520.2	PSI_type_III_chlorophyll_a/b-binding_protein
REFERENCE	evm.model.scaffold262_size380975.31	Pyrophosphate--fructose 6-phosphate 1-phosphotransferase subunit alpha	EC:2.7.1.90;EC:2.7.1.11	G	AT1G20950.1	Phosphofructokinase_family_protein
REFERENCE	evm.model.scaffold262_size380975.30	Pyrophosphate--fructose 6-phosphate 1-phosphotransferase subunit alpha	EC:2.7.1.90;EC:2.7.1.11	G	AT1G20950.1	Phosphofructokinase_family_protein
REFERENCE	evm.model.scaffold261_size381946.38	protein phosphatase 2C 57	EC:3.1.3.16	T	AT4G27800.1	thylakoid-associated_phosphatase_38
REFERENCE	evm.model.scaffold260_size384151.75	ribulose-phosphate 3-epimerase, chloroplastic	EC:5.1.3.1	G	AT5G61410.2	D-ribulose-5-phosphate-3-epimerase
REFERENCE	evm.model.scaffold260_size384151.34	Photosystem I subunit O	noEC	S	AT1G08380.1	photosystem_I_subunit_O
REFERENCE	evm.model.scaffold251_size391187.6	protein ACTIVITY OF BC1 COMPLEX KINASE 1, chloroplastic	EC:7.2.2.2	S	AT4G31390.1	Protein_kinase_superfamily_protein
REFERENCE	evm.model.scaffold242_size401956.36	Putative zinc metalloprotease EGY1, chloroplastic	EC:3.4.24	M	AT5G35220.1	Peptidase_M50_family_protein
REFERENCE	evm.model.scaffold236_size412999.22	psbP domain-containing protein 3, chloroplastic	noEC	S	AT1G76450.1	Photosystem_II_reaction_center_PsbP_family_protein
REFERENCE	evm.model.scaffold226_size429880.100	Proline--tRNA ligase	EC:6.1.1.15	J	AT5G52520.1	Class_II_aaRS_and_biotin_synthetases_superfamily_protein
REFERENCE	evm.model.scaffold225_size433522.31	Oxygen-evolving enhancer protein 2, chloroplastic	noEC	S	AT1G06680.1	photosystem_II_subunit_P-1
REFERENCE	evm.model.scaffold223_size435064.52	Chlorophyll a-b binding protein, chloroplastic	noEC	P	AT5G01530.1	light_harvesting_complex_photosystem_II
REFERENCE	evm.model.scaffold218_size439493.63	Chlorophyll a-b binding protein, chloroplastic	EC:3.1.1.73;EC:3.1.1.1	I	AT3G47560.4	alpha/beta-Hydrolases_superfamily_protein
REFERENCE	evm.model.scaffold217_size439810.40	photosystem I reaction center subunit V, chloroplastic-like	noEC	S	AT1G55670.1	photosystem_I_subunit_G
REFERENCE	evm.model.scaffold217_size439810.39	photosystem I reaction center subunit V, chloroplastic-like	noEC	S	AT1G55670.1	photosystem_I_subunit_G
REFERENCE	evm.model.scaffold210_size448060.4	Photosystem II CP47 reaction center protein	noEC	C	ATCG00680.1	photosystem_II_reaction_center_protein_B
REFERENCE	evm.model.scaffold190_size480112.103	Ferredoxin-thioredoxin reductase, variable chain-like	EC:2.8.1.8	H	AT5G08410.2	ferredoxin/thioredoxin_reductase_subunit_A_(variable_subunit)_2
REFERENCE	evm.model.scaffold190_size480112.102	Ferritin	EC:1.16.3.1;EC:1.16.3	P	AT5G01600.1	ferretin_1
REFERENCE	evm.model.scaffold190_size480112.73	thioredoxin-like 2, chloroplastic	EC:3.5.1.52	O	AT4G29670.1	atypical_CYS_HIS_rich_thioredoxin_2
REFERENCE	evm.model.scaffold190_size480112.10	Photosystem II reaction center PsbP family protein	noEC	S	AT1G77090.1	thylakoid_lumenal_protein_(Mog1/PsbP/DUF1795-like_photosystem_II_reaction_center_PsbP_family_protein)
REFERENCE	evm.model.scaffold189_size480584.13	Chlorophyll a-b binding protein, chloroplastic	noEC	P	AT3G47470.1	light-harvesting_chlorophyll-protein_complex_I_subunit_A4
REFERENCE	evm.model.scaffold188_size480585.76	NADPH-protochlorophyllide oxidoreductase	EC:1.6.99.1;EC:1.3.1.33	Q	AT1G03630.2	protochlorophyllide_oxidoreductase_C
REFERENCE	evm.model.scaffold182_size489013.60	photosystem II reaction center W protein, chloroplastic-like	noEC	S	AT2G30570.1	photosystem_II_reaction_center_W
REFERENCE	evm.model.scaffold179_size500287.1	Digalactosyldiacylglycerol synthase 1, chloroplastic	EC:2.4.1.241	S	AT3G11670.1	UDP-Glycosyltransferase_superfamily_protein
REFERENCE	evm.model.scaffold176_size503880.73	NADPH-protochlorophyllide oxidoreductase	EC:1.3.1.33	Q	AT5G54190.1	protochlorophyllide_oxidoreductase_A
REFERENCE	evm.model.scaffold175_size507515.75	Chlorophyll a-b binding protein, chloroplastic	noEC	P	AT1G76570.1	Chlorophyll_A-B_binding_family_protein
REFERENCE	evm.model.scaffold172_size512938.38	magnesium-protoporphyrin IX monomethyl ester [oxidative] cyclase, chloroplastic	EC:1.14.13.81;EC:1.14.13	S	AT3G56940.1	dicarboxylate_diiron_protein%2C_putative_(Crd1)
REFERENCE	evm.model.scaffold168_size520293.36	Photosystem II PsbX	noEC	M	AT2G06520.1	photosystem_II_subunit_X
REFERENCE	evm.model.scaffold165_size523336.103	Ribulose bisphosphate carboxylase small chain	EC:4.1.1.39	E	AT5G38430.2	Ribulose_bisphosphate_carboxylase_(small_chain)_family_protein
REFERENCE	evm.model.scaffold163_size528813.120	Cysteine-rich repeat secretory protein 3	noEC	S	AT1G04520.1	plasmodesmata-located_protein_2
REFERENCE	evm.model.scaffold161_size531985.97	Omega-6 fatty acid desaturase	noEC	I	AT4G30950.1	fatty_acid_desaturase_6
REFERENCE	evm.model.scaffold160_size534036.93	rhodanese-like domain-containing protein 4, chloroplastic	EC:3.2.1.14	S	AT4G01050.1	thylakoid_rhodanese-like_protein
REFERENCE	evm.model.scaffold155_size543531.81	Ribulose bisphosphate carboxylase small chain	EC:4.1.1.39	E	AT5G38410.1	Ribulose_bisphosphate_carboxylase_(small_chain)_family_protein
REFERENCE	evm.model.scaffold155_size543531.55	Carbohydrate/puine kinase, PfkB, conserved site protein	EC:2.7.1.20	G	AT4G27600.1	pfkB-like_carbohydrate_kinase_family_protein
REFERENCE	evm.model.scaffold151_size559051.39	Protein translocase subunit SecA	EC:3.6.1.3;EC:7.4.2.3;EC:7.4.2.4;EC:7.4.2.5;EC:3.6.1.15	C	AT4G01800.3	Albino_or_Glassy_Yellow_1
REFERENCE	evm.model.scaffold148_size560834.48	Photosystem II 22 kDa protein, chloroplastic	noEC	C	AT1G44575.3	Chlorophyll_A-B_binding_family_protein
REFERENCE	evm.model.scaffold144_size572261.138	Oxygen-evolving enhancer protein 1, chloroplastic	noEC	S	AT3G50820.1	photosystem_II_subunit_O-2
REFERENCE	evm.model.scaffold141_size577029.33	Oxygen-evolving enhancer protein 2, chloroplastic	noEC	C	AT1G06680.1	photosystem_II_subunit_P-1
REFERENCE	evm.model.scaffold135_size590554.168	Calcium homeostasis regulator CHoR1	noEC	S	AT3G55250.1	calcium_homeostasis_regulator
REFERENCE	evm.model.scaffold135_size590554.166	Protease do-like 1, chloroplastic	EC:3.4.21	O	AT3G27925.2	DegP_protease_1
REFERENCE	evm.model.scaffold130_size602244.97	Photosystem ii 10 kDa polypeptide, chloroplastic	noEC	S	AT1G79040.1	photosystem_II_subunit_R
REFERENCE	evm.model.scaffold129_size605804.19	Chlorophyll a-b binding protein, chloroplastic	noEC	C	AT1G15820.1	light_harvesting_complex_photosystem_II_subunit_6
REFERENCE	evm.model.scaffold128_size606351.96	PGR5-like protein 1A, chloroplastic	noEC	S	AT4G22890.3	PGR5-LIKE_A
REFERENCE	evm.model.scaffold125_size608205.43	photosystem II reaction center W protein, chloroplastic-like	noEC	S	AT2G30570.1	photosystem_II_reaction_center_W
REFERENCE	evm.model.scaffold120_size617610.155	Chlorophyll a-b binding protein, chloroplastic	noEC	P	AT1G29930.1	chlorophyll_A/B_binding_protein_1
REFERENCE	evm.model.scaffold120_size617610.154	Chlorophyll a-b binding protein, chloroplastic	noEC	C	AT2G34430.1	light-harvesting_chlorophyll-protein_complex_II_subunit_B1
REFERENCE	evm.model.scaffold119_size622808.4	protein PROTON GRADIENT REGULATION 5, chloroplastic-like	noEC	S	AT2G05620.2	proton_gradient_regulation_5
REFERENCE	evm.model.scaffold117_size639039.96	Protease do-like 2, chloroplastic	EC:3.4.21;EC:1.3.1.74	O	AT2G47940.2	DEGP_protease_2
REFERENCE	evm.model.scaffold117_size639039.8	protein PROTON GRADIENT REGULATION 5, chloroplastic-like	noEC	S	AT2G05620.2	proton_gradient_regulation_5
REFERENCE	evm.model.scaffold116_size639307.109	photosystem II core complex proteins psbY, chloroplastic-like	noEC	S	AT1G67740.1	photosystem_II_BY
REFERENCE	evm.model.scaffold113_size644116.154	Protein translocase subunit SecA	EC:3.6.1.3;EC:7.4.2.3;EC:7.4.2.4;EC:7.4.2.5;EC:3.6.1.15	U	AT1G21650.2	Preprotein_translocase_SecA_family_protein
REFERENCE	evm.model.scaffold110_size649966.101	Protease do-like 1, chloroplastic	EC:3.4.21	O	AT3G27925.2	DegP_protease_1
REFERENCE	evm.model.scaffold110_size649966.99	Calcium homeostasis regulator CHoR1	noEC	S	AT3G55250.1	calcium_homeostasis_regulator
REFERENCE	evm.model.scaffold108_size655003.1	oxygen-evolving enhancer protein 3-2, chloroplastic-like	noEC	S	AT4G05180.2	photosystem_II_subunit_Q-2
REFERENCE	evm.model.scaffold102_size677817.157	Chlorophyll a-b binding protein, chloroplastic	noEC	C	AT1G61520.3	PSI_type_III_chlorophyll_a/b-binding_protein
REFERENCE	evm.model.scaffold102_size677817.130	Mg-protoporphyrin IX chelatase	EC:3.6.1.3;EC:3.6.1.15;EC:6.6.1.1	F	AT4G18480.1	P-loop_containing_nucleoside_triphosphate_hydrolases_superfamily_protein
REFERENCE	evm.model.scaffold102_size677817.55	Protease Do-like 5, chloroplastic	EC:3.4.21	O	AT4G18370.1	DEGP_protease_5
REFERENCE	evm.model.scaffold102_size677817.10	Photosystem II D1 processing protein PSB27-H2, chloroplastic	noEC	S	AT1G05385.2	photosystem_II_11_kDa_protein-like_protein
REFERENCE	evm.model.scaffold98_size696804.84	Photosystem i reaction center subunit ii, chloroplastic	noEC	C	AT1G03130.1	photosystem_I_subunit_D-2
REFERENCE	evm.model.scaffold97_size696948.123	Phosphoglycerate kinase	EC:2.7.2.3	G	AT1G56190.1	Phosphoglycerate_kinase_family_protein
REFERENCE	evm.model.scaffold91_size726399.141	Sedoheptulose-1,7-bisphosphatase, chloroplastic	EC:3.1.3.37;EC:3.1.3.23;EC:3.1.3.11	G	AT3G55800.1	sedoheptulose-bisphosphatase
REFERENCE	evm.model.scaffold91_size726399.93	Acetyltransferase NSI (Fragment)	EC:2.3.1.32;EC:2.3.1.87;EC:2.3.1.5;EC:2.3.1.48	S	AT1G32070.3	nuclear_shuttle_interacting
REFERENCE	evm.model.scaffold87_size752611.115	Geranylgeranyl reductase	EC:1.3.1.83	C	AT1G74470.1	Pyridine_nucleotide-disulfide_oxidoreductase_family_protein
REFERENCE	evm.model.scaffold86_size753315.197	Photosystem II reaction center PsbP family protein	noEC	S	AT1G77090.1	thylakoid_lumenal_protein_(Mog1/PsbP/DUF1795-like_photosystem_II_reaction_center_PsbP_family_protein)
REFERENCE	evm.model.scaffold82_size768308.202	Chlorophyll a-b binding protein, chloroplastic	noEC	C	AT1G29930.1	chlorophyll_A/B_binding_protein_1
REFERENCE	evm.model.scaffold82_size768308.201	Chlorophyll a-b binding protein, chloroplastic	noEC	C	AT2G34430.1	light-harvesting_chlorophyll-protein_complex_II_subunit_B1
REFERENCE	evm.model.scaffold81_size768935.51	scarecrow-like protein 3	EC:6.6.1.1	K	AT1G50420.1	scarecrow-like_3
REFERENCE	evm.model.scaffold80_size769704.44	Psbp domain-containing protein 1, chloroplastic	noEC	S	AT4G15510.1	Photosystem_II_reaction_center_PsbP_family_protein
REFERENCE	evm.model.scaffold79_size776185.51	Pyridine nucleotide-disulfide oxidoreductase	noEC	S	AT4G30720.1	FAD/NAD(P)-binding_oxidoreductase_family_protein
REFERENCE	evm.model.scaffold76_size807220.15	psbP domain-containing protein 2, chloroplastic	noEC	S	AT2G28605.1	Photosystem_II_reaction_center_PsbP_family_protein
REFERENCE	evm.model.scaffold75_size815677.166	probable GTP diphosphokinase RSH2, chloroplastic	EC:2.7.6.5;EC:3.1.7.2	T	AT1G54130.1	RELA/SPOT_homolog_3
REFERENCE	evm.model.scaffold73_size822997.107	Omega-6 fatty acid desaturase	noEC	I	AT4G30950.1	fatty_acid_desaturase_6
REFERENCE	evm.model.scaffold72_size829870.18	Chlorophyll a-b binding protein, chloroplastic	noEC	P	AT4G10340.1	light_harvesting_complex_of_photosystem_II_5
REFERENCE	evm.model.scaffold70_size835982.103	Pyrophosphate--fructose 6-phosphate 1-phosphotransferase subunit alpha	EC:2.7.1.90;EC:2.7.1.11	G	AT1G76550.1	Phosphofructokinase_family_protein
REFERENCE	evm.model.scaffold70_size835982.86	Photosystem ii 10 kDa polypeptide, chloroplastic	noEC	S	AT1G79040.1	photosystem_II_subunit_R
REFERENCE	evm.model.scaffold70_size835982.84	Photosystem ii 10 kDa polypeptide, chloroplastic	noEC	S	AT1G79040.1	photosystem_II_subunit_R
REFERENCE	evm.model.scaffold69_size841560.167	Photosystem II 22 kDa protein, chloroplastic	noEC	C	AT1G44575.3	Chlorophyll_A-B_binding_family_protein
REFERENCE	evm.model.scaffold68_size843662.77	Chlorophyll a-b binding protein, chloroplastic	noEC	C	AT1G15820.1	light_harvesting_complex_photosystem_II_subunit_6
REFERENCE	evm.model.scaffold68_size843662.41	Chlorophyll a-b binding protein, chloroplastic	noEC	C	AT1G15820.1	light_harvesting_complex_photosystem_II_subunit_6
REFERENCE	evm.model.scaffold67_size845796.130	Photosystem I reaction centre subunit N	noEC	none	AT1G49975.1	photosystem_I_reaction_center_subunit_N
REFERENCE	evm.model.scaffold66_size848830.205	Protein translocase subunit SecA	EC:3.6.1.3;EC:7.4.2.3;EC:7.4.2.4;EC:7.4.2.5;EC:3.6.1.15	U	AT1G21650.1	Preprotein_translocase_SecA_family_protein
REFERENCE	evm.model.scaffold66_size848830.41	Photosystem II reaction center PsbP family protein	noEC	S	AT1G77090.1	thylakoid_lumenal_protein_(Mog1/PsbP/DUF1795-like_photosystem_II_reaction_center_PsbP_family_protein)
REFERENCE	evm.model.scaffold62_size859589.185	Plastid-lipid-associated protein	noEC	S	AT4G22240.1	Plastid-lipid_associated_protein_PAP_/_fibrillin_family_protein
REFERENCE	evm.model.scaffold62_size859589.53	Chlorophyll a-b binding protein, chloroplastic	noEC	C	AT3G54890.1	chlorophyll_a-b_binding_protein_6
REFERENCE	evm.model.scaffold57_size904867.101	Protein ROOT PRIMORDIUM DEFECTIVE 1	noEC	S	AT4G01037.1	Ubiquitin_carboxyl-terminal_hydrolase_family_protein
REFERENCE	evm.model.scaffold57_size904867.43	Photosystem I P700 chlorophyll a apoprotein A1	noEC	C	ATCG00350.1	Photosystem_I%2C_PsaA/PsaB_protein
REFERENCE	evm.model.scaffold57_size904867.42	Photosystem I P700 chlorophyll a apoprotein A2	noEC	C	ATCG00340.1	Photosystem_I%2C_PsaA/PsaB_protein
REFERENCE	evm.model.scaffold57_size904867.41	Ribulose bisphosphate carboxylase large chain	EC:4.1.1.39	G	ATCG00490.1	ribulose-bisphosphate_carboxylase
REFERENCE	evm.model.scaffold51_size953629.36	PGR5-like protein 1A, chloroplastic	noEC	S	AT4G22890.4	PGR5-LIKE_A
REFERENCE	evm.model.scaffold50_size963328.218	Sedoheptulose-1,7-bisphosphatase, chloroplastic	EC:3.1.3.37;EC:3.1.3.23;EC:3.1.3.11	G	AT3G55800.1	sedoheptulose-bisphosphatase
REFERENCE	evm.model.scaffold48_size992202.57	Photosystem II reaction center PsbP family protein	noEC	S	AT3G05410.2	Photosystem_II_reaction_center_PsbP_family_protein
REFERENCE	evm.model.scaffold47_size1002735.96	Isopentenyl diphosphate isomerase (Fragment)	EC:5.3.3.2	Q	AT5G16440.1	isopentenyl_diphosphate_isomerase_1
REFERENCE	evm.model.scaffold46_size1006163.47	trihelix transcription factor ASR3-like	noEC	S	AT2G35640.1	Homeodomain-like_superfamily_protein
REFERENCE	evm.model.scaffold45_size1012159.31	Photosystem II D2 protein	noEC	C	ATCG00270.1	photosystem_II_reaction_center_protein_D
REFERENCE	evm.model.scaffold45_size1012159.30	Photosystem II CP43 reaction center protein	noEC	C	ATCG00280.1	photosystem_II_reaction_center_protein_C
REFERENCE	evm.model.scaffold45_size1012159.29	Photosystem I P700 chlorophyll a apoprotein A2	noEC	C	ATCG00340.1	Photosystem_I%2C_PsaA/PsaB_protein
REFERENCE	evm.model.scaffold44_size1017685.94	psbP domain-containing protein 4, chloroplastic	noEC	S	AT1G77090.1	thylakoid_lumenal_protein_(Mog1/PsbP/DUF1795-like_photosystem_II_reaction_center_PsbP_family_protein)
REFERENCE	evm.model.scaffold43_size1025288.209	Chlorophyll a-b binding protein, chloroplastic	noEC	C	AT1G29920.1	chlorophyll_A/B-binding_protein_2
REFERENCE	evm.model.scaffold43_size1025288.206	Chlorophyll a-b binding protein, chloroplastic	noEC	C	AT2G34430.1	light-harvesting_chlorophyll-protein_complex_II_subunit_B1
REFERENCE	evm.model.scaffold41_size1047198.214	Photosystem II core complex proteins psbY, chloroplastic	noEC	S	AT1G67740.1	photosystem_II_BY
REFERENCE	evm.model.scaffold40_size1048927.188	Solanesyl diphosphate synthase	EC:2.5.1.29;EC:2.5.1.30;EC:2.5.1.85;EC:2.5.1.84	H	AT1G78510.1	solanesyl_diphosphate_synthase_1
REFERENCE	evm.model.scaffold37_size1057303.70	Photosystem II protein D1	EC:1.10.3	C	ATCG00020.1	photosystem_II_reaction_center_protein_A
REFERENCE	evm.model.scaffold37_size1057303.66	Photosystem II CP47 reaction center protein	noEC	C	ATCG00680.1	photosystem_II_reaction_center_protein_B
REFERENCE	evm.model.scaffold37_size1057303.61	Cytochrome f	noEC	C	ATCG00540.1	photosynthetic_electron_transfer_A
REFERENCE	evm.model.scaffold37_size1057303.58	Photosystem I P700 chlorophyll a apoprotein A1	noEC	C	ATCG00350.1	Photosystem_I%2C_PsaA/PsaB_protein
REFERENCE	evm.model.scaffold37_size1057303.57	Photosystem I P700 apoprotein A2 (Fragment)	noEC	C	ATCG00340.1	Photosystem_I%2C_PsaA/PsaB_protein
REFERENCE	evm.model.scaffold37_size1057303.56	Cytochrome f	noEC	C	ATCG00540.1	photosynthetic_electron_transfer_A
REFERENCE	evm.model.scaffold37_size1057303.55	Photosystem II CP43 reaction center protein	noEC	C	ATCG00280.1	photosystem_II_reaction_center_protein_C
REFERENCE	evm.model.scaffold37_size1057303.54	Photosystem II D2 protein	noEC	C	ATCG00270.1	photosystem_II_reaction_center_protein_D
REFERENCE	evm.model.scaffold35_size1080921.20	Photosystem I reaction center subunit III, chloroplastic	noEC	S	AT1G31330.1	photosystem_I_subunit_F
REFERENCE	evm.model.scaffold34_size1082081.217	ATP synthase gamma chain, chloroplastic	noEC	C	AT4G04640.1	ATPase%2C_F1_complex%2C_gamma_subunit_protein
REFERENCE	evm.model.scaffold33_size1110170.269	serine/threonine-protein kinase STN8, chloroplastic	EC:2.7.11	T	AT5G01920.2	Protein_kinase_superfamily_protein
REFERENCE	evm.model.scaffold31_size1122664.209	Chlorophyll a-b binding protein, chloroplastic	noEC	C	AT4G10340.1	light_harvesting_complex_of_photosystem_II_5
REFERENCE	evm.model.scaffold30_size1136906.216	Pyrophosphate--fructose 6-phosphate 1-phosphotransferase subunit beta	EC:2.7.1.90;EC:2.7.1.11	G	AT1G12000.1	Phosphofructokinase_family_protein
REFERENCE	evm.model.scaffold29_size1161289.68	psbP domain-containing protein 6, chloroplastic	noEC	S	AT3G56650.1	thylakoid_lumenal_protein_(Mog1/PsbP/DUF1795-like_photosystem_II_reaction_center_PsbP_family_protein)
REFERENCE	evm.model.scaffold28_size1211183.312	psbP domain-containing protein 3, chloroplastic	noEC	S	AT1G76450.1	Photosystem_II_reaction_center_PsbP_family_protein
REFERENCE	evm.model.scaffold27_size1214473.135	Chlorophyll a-b binding protein, chloroplastic	noEC	P	AT3G08940.2	light_harvesting_complex_photosystem_II
REFERENCE	evm.model.scaffold26_size1224954.289	fructose-1,6-bisphosphatase, cytosolic-like	EC:1.3.1.74;EC:3.1.3.23;EC:3.1.3.11	G	AT1G43670.1	Inositol_monophosphatase_family_protein
REFERENCE	evm.model.scaffold23_size1301348.108	Protein translocase subunit SecA	EC:3.6.1.3;EC:7.4.2.3;EC:7.4.2.4;EC:7.4.2.5;EC:3.6.1.15	F	AT1G21650.2	Preprotein_translocase_SecA_family_protein
REFERENCE	evm.model.scaffold22_size1326342.324	digalactosyldiacylglycerol synthase 1, chloroplastic-like	EC:2.4.1.241	S	AT3G11670.1	UDP-Glycosyltransferase_superfamily_protein
REFERENCE	evm.model.scaffold21_size1333958.318	Triosephosphate isomerase, chloroplastic	EC:5.3.1.1	G	AT2G21170.3	triosephosphate_isomerase
REFERENCE	evm.model.scaffold21_size1333958.19	protein CURVATURE THYLAKOID 1B, chloroplastic	noEC	S	AT2G46820.2	photosystem_I_P_subunit
REFERENCE	evm.model.scaffold20_size1366081.11	Protease Do-like 7	EC:3.4.21	O	AT3G03380.1	DegP_protease_7
REFERENCE	evm.model.scaffold19_size1367837.232	Ferredoxin-thioredoxin reductase, variable chain-like	EC:2.8.1.8	H	AT5G08410.2	ferredoxin/thioredoxin_reductase_subunit_A_(variable_subunit)_2
REFERENCE	evm.model.scaffold17_size1411551.290	serine/threonine-protein kinase STN7, chloroplastic	EC:2.7.11	T	AT1G68830.1	Serine/Threonine_kinase_domain_protein
REFERENCE	evm.model.scaffold17_size1411551.81	K(+) efflux antiporter 3, chloroplastic	EC:1.8.4.12	P	AT4G04850.2	K+_efflux_antiporter_3
REFERENCE	evm.model.scaffold16_size1429268.238	ATP synthase epsilon chain, chloroplastic	noEC	S	AT3G19480.1	D-3-phosphoglycerate_dehydrogenase
REFERENCE	evm.model.scaffold16_size1429268.237	ATP-dependent zinc metalloprotease FTSH, chloroplastic	EC:3.4.24;EC:3.6.1.3;EC:3.6.1.15	O	AT5G42270.1	FtsH_extracellular_protease_family
REFERENCE	evm.model.scaffold15_size1429888.264	Photosystem II subunit Q-2	noEC	S	AT4G05180.2	photosystem_II_subunit_Q-2
REFERENCE	evm.model.scaffold15_size1429888.29	K(+) efflux antiporter 3, chloroplastic	EC:1.8.4.12	P	AT4G04850.2	K+_efflux_antiporter_3
REFERENCE	evm.model.scaffold10_size1516488.313	Putative ribose-5-phosphate isomerase 3, chloroplastic	EC:5.3.1.6	G	AT3G04790.1	Ribose_5-phosphate_isomerase%2C_type_A_protein
REFERENCE	evm.model.scaffold9_size1555044.364	Pyrophosphate--fructose 6-phosphate 1-phosphotransferase subunit beta	EC:2.7.1.90;EC:2.7.1.11	G	AT1G12000.1	Phosphofructokinase_family_protein
REFERENCE	evm.model.scaffold9_size1555044.300	Calvin cycle protein cp12-1, chloroplastic	noEC	S	AT2G47400.1	CP12_domain-containing_protein_1
REFERENCE	evm.model.scaffold8_size1575602.306	Mg-protoporphyrin IX chelatase	EC:6.6.1.1	Z	AT1G08520.1	ALBINA_1
REFERENCE	evm.model.scaffold8_size1575602.245	Pentatricopeptide repeat-containing protein	noEC	S	AT3G22690.2	LOW_protein:_PPR_containing-like_protein
REFERENCE	evm.model.scaffold7_size1580086.371	calvin cycle protein CP12-1, chloroplastic-like	noEC	S	AT2G47400.1	CP12_domain-containing_protein_1
REFERENCE	evm.model.scaffold7_size1580086.38	UPF0187 protein At3g61320, chloroplastic-like	noEC	S	AT3G61320.1	Bestrophin-like_protein
REFERENCE	evm.model.scaffold2_size1816428.449	Carbonic anhydrase	EC:4.2.1.1	P	AT3G01500.3	carbonic_anhydrase_1
REFERENCE	evm.model.scaffold2_size1816428.436	protease Do-like 8, chloroplastic	EC:3.4.21;EC:1.3.1.74	O	AT5G39830.1	Trypsin_family_protein_with_PDZ_domain-containing_protein
REFERENCE	evm.model.scaffold2_size1816428.45	Photosystem I subunit O	noEC	S	AT1G08380.1	photosystem_I_subunit_O
[OVER]	GO:0009579	thylakoid	CELLULAR_COMPONENT	0.009656583804544993	0.0010453003087394065	54	637	1347	25713
TEST	evm.model.scaffold746_size79265.19	thylakoid lumenal 17.9 kDa protein, chloroplastic	noEC	S	AT4G24930.1	thylakoid_lumenal_17.9_kDa_protein%2C_chloroplast
TEST	evm.model.scaffold655_size115805.10	Protein FLUORESCENT IN BLUE LIGHT, chloroplastic	noEC	S	AT3G14110.2	Tetratricopeptide_repeat_(TPR)-like_superfamily_protein
TEST	evm.model.scaffold637_size123618.7	Putative mog1/PsbP/DUF1795-like photosystem II reaction center PsbP family protein-like	noEC	J	AT5G27390.1	tagatose-6-phosphate_ketose/aldose_isomerase%2C_putative_(Mog1/PsbP/DUF1795-like_photosystem_II_reaction_center_PsbP_family_protein)
TEST	evm.model.scaffold606_size133267.11	palmitoyl-monogalactosyldiacylglycerol delta-7 desaturase, chloroplastic-like	EC:1.14.19.1;EC:1.14.19	I	AT3G15850.1	fatty_acid_desaturase_5
TEST	evm.model.scaffold594_size138683.5	psbP domain-containing protein 5, chloroplastic	noEC	S	AT5G11450.2	PsbP_domain_protein_(Mog1/PsbP/DUF1795-like_photosystem_II_reaction_center_PsbP_family_protein)
TEST	evm.model.scaffold574_size148320.10	Photosystem II reaction center Psb28 protein	noEC	S	AT4G28660.1	photosystem_II_reaction_center_PSB28_protein
TEST	evm.model.scaffold554_size161974.32	probable plastid-lipid-associated protein 12, chloroplastic	noEC	S	AT1G51110.1	Plastid-lipid_associated_protein_PAP_/_fibrillin_family_protein
TEST	evm.model.scaffold517_size186048.20	Membrane-associated protein vipp1, chloroplastic	noEC	KT	AT1G65260.1	plastid_transcriptionally_active_4
TEST	evm.model.scaffold509_size189280.5	leiomodin-2-like isoform X1	noEC	S	AT1G34000.1	one-helix_protein_2
TEST	evm.model.scaffold481_size205178.8	photosystem II repair protein PSB27-H1, chloroplastic	noEC	S	AT1G03600.1	photosystem_II_family_protein
TEST	evm.model.scaffold478_size208472.28	Tetratricopeptide-like helical	noEC	S	AT1G22700.2	Tetratricopeptide_repeat_(TPR)-like_superfamily_protein
TEST	evm.model.scaffold461_size219499.8	PGR5-like protein 1B, chloroplastic isoform X1	noEC	S	AT5G59400.1	PGR5-like_A_protein
TEST	evm.model.scaffold459_size221187.6	Synechocystis YCF37	noEC	none	AT2G23670.1	homolog_of_Synechocystis_YCF37
TEST	evm.model.scaffold437_size236406.31	nitrogen regulatory protein P-II homolog	noEC	K	AT4G01900.1	nitrogen_regulatory_P-II-like_protein
TEST	evm.model.scaffold428_size240870.45	ATP-dependent Clp protease ATP-binding subunit CLPT1, chloroplastic-like	noEC	O	AT4G25370.1	Double_Clp-N_motif_protein
TEST	evm.model.scaffold388_size273501.30	30S ribosomal protein S17, chloroplastic	noEC	J	AT1G79850.1	ribosomal_protein_S17
TEST	evm.model.scaffold374_size280266.46	probable plastid-lipid-associated protein 4, chloroplastic	noEC	S	AT3G26070.1	Plastid-lipid_associated_protein_PAP_/_fibrillin_family_protein
TEST	evm.model.scaffold336_size320595.20	Peptidylprolyl isomerase	EC:5.2.1.8	O	AT1G20810.1	FKBP-like_peptidyl-prolyl_cis-trans_isomerase_family_protein
TEST	evm.model.scaffold335_size320703.49	Acetylglutamate kinase, chloroplastic	EC:2.3.1.1;EC:2.7.2.8;EC:2.3.1.5	E	AT3G57560.1	N-acetyl-l-glutamate_kinase
TEST	evm.model.scaffold332_size321420.84	Os11g0242400 protein	EC:1.7.1.4	P	AT1G71500.1	Rieske_(2Fe-2S)_domain-containing_protein
TEST	evm.model.scaffold316_size337115.25	Integrator complex subunit 11 like	noEC	none	AT3G56010.1	transmembrane_protein
TEST	evm.model.scaffold301_size346720.18	Zinc finger/BTB domain protein	noEC	none	AT1G33810.1	zinc_finger/BTB_domain_protein
TEST	evm.model.scaffold288_size356667.32	Violaxanthin de-epoxidase	EC:1.10.99.3	S	AT1G08550.3	non-photochemical_quenching_1
TEST	evm.model.scaffold246_size398760.66	H/ACA ribonucleoprotein complex subunit	noEC	J	AT3G03920.1	H/ACA_ribonucleoprotein_complex%2C_subunit_Gar1/Naf1_protein
TEST	evm.model.scaffold240_size406237.33	NADH dehydrogenase subunit B (Fragment)	EC:7.1.1.2;EC:1.6.99.5;EC:1.6.99.3	C	ATCG01250.1	NADH-quinone_oxidoreductase_protein
TEST	evm.model.scaffold234_size415727.104	Photosystem II stability/assembly factor, chloroplastic	noEC	U	AT5G23120.2	photosystem_II_stability/assembly_factor%2C_chloroplast_(HCF136)
TEST	evm.model.scaffold164_size528297.105	Protein LOW PSII ACCUMULATION 2, chloroplastic	noEC	O	AT5G51545.1	low_psii_accumulation2
TEST	evm.model.scaffold160_size534036.66	V-set and immunoglobulin domain-containing protein	noEC	S	AT4G31560.1	high_chlorophyll_fluorescence_153
TEST	evm.model.scaffold146_size566370.56	Tocopherol cyclase	noEC	S	AT4G32770.1	tocopherol_cyclase%2C_chloroplast_/_vitamin_E_deficient_1_(VTE1)_/_sucrose_export_defective_1_(SXD1)
TEST	evm.model.scaffold144_size572261.144	UPF0603 protein At1g54780, chloroplastic	EC:3.1.3.2	S	AT1G54780.1	thylakoid_lumen_18.3_kDa_protein
TEST	evm.model.scaffold141_size577029.99	protein TIC 100	noEC	S	AT5G22640.1	MORN_(Membrane_Occupation_and_Recognition_Nexus)_repeat-containing_protein
TEST	evm.model.scaffold141_size577029.36	Protein LHCP translocation defect	noEC	S	AT1G50900.1	Ankyrin_repeat_family_protein
TEST	evm.model.scaffold132_size599623.44	Photosystem I assembly protein Ycf4	noEC	S	ATCG00520.1	unfolded_protein_binding_protein
TEST	evm.model.scaffold122_size611765.74	Thylakoid lumenal 16.5 kDa protein, chloroplastic	noEC	S	AT4G02530.2	chloroplast_thylakoid_lumen_protein
TEST	evm.model.scaffold112_size645884.50	Putative ovule protein	noEC	S	AT3G61870.1	plant/protein
TEST	evm.model.scaffold104_size664890.141	photosystem I reaction center subunit N, chloroplastic-like	noEC	S	AT5G64040.1	photosystem_I_reaction_center_subunit_PSI-N%2C_chloroplast%2C_putative_/_PSI-N%2C_putative_(PSAN)
TEST	evm.model.scaffold102_size677817.49	ribosome-binding factor PSRP1, chloroplastic-like	noEC	J	AT5G24490.1	30S_ribosomal_protein
TEST	evm.model.scaffold101_size679088.151	Glutamyl-tRNA reductase-binding protein, chloroplastic	noEC	S	AT3G21200.1	proton_gradient_regulation_7
TEST	evm.model.scaffold74_size818217.27	stress enhanced protein 2, chloroplastic	noEC	S	AT2G21970.1	stress_enhanced_protein_2
TEST	evm.model.scaffold61_size863762.176	Ribosomal protein	noEC	J	AT3G63490.1	Ribosomal_protein_L1p/L10e_family
TEST	evm.model.scaffold61_size863762.37	Photosystem I reaction center subunit XI, chloroplastic	noEC	S	AT4G12800.1	photosystem_I_subunit_l
TEST	evm.model.scaffold56_size905644.70	Photosystem I reaction center subunit VI, chloroplastic	noEC	S	AT1G52230.1	photosystem_I_subunit_H2
TEST	evm.model.scaffold48_size992202.156	photosystem I reaction center subunit psaK, chloroplastic	noEC	S	AT1G30380.1	photosystem_I_subunit_K
TEST	evm.model.scaffold48_size992202.39	Myelin-associated oligodendrocyte basic protein	noEC	S	AT1G54520.1	myelin-associated_oligodendrocyte_basic_protein
TEST	evm.model.scaffold46_size1006163.41	Ycf3-interacting protein 1, chloroplastic	noEC	S	AT5G44650.1	death_domain_associated_protein
TEST	evm.model.scaffold45_size1012159.5	thylakoid membrane protein TERC, chloroplastic isoform X1	noEC	P	AT5G12130.2	integral_membrane_TerC_family_protein
TEST	evm.model.scaffold41_size1047198.127	Cytochrome c-type biogenesis ccda-like chloroplastic protein 2	noEC	O	AT5G54290.1	cytochrome_c_biogenesis_protein_family
TEST	evm.model.scaffold37_size1057303.20	protein COFACTOR ASSEMBLY OF COMPLEX C SUBUNIT B CCB3, chloroplastic-like	noEC	S	AT5G36120.1	cofactor_assembly%2C_complex_C_(B6F)
TEST	evm.model.scaffold34_size1082081.91	Thylakoid lumenal 19 kDa protein, chloroplastic	noEC	S	AT3G63540.1	thylakoid_lumenal_protein_(Mog1/PsbP/DUF1795-like_photosystem_II_reaction_center_PsbP_family_protein)
TEST	evm.model.scaffold29_size1161289.20	Uncharacterized protein	noEC	none	AT2G29180.1	transmembrane_protein
TEST	evm.model.scaffold8_size1575602.41	chloroplastic lipocalin	noEC	M	AT3G47860.1	chloroplastic_lipocalin
TEST	evm.model.scaffold7_size1580086.333	sec-independent protein translocase protein TATC, chloroplastic	EC:7.4.2.3;EC:7.4.2.4	U	AT2G01110.1	Sec-independent_periplasmic_protein_translocase
TEST	evm.model.scaffold5_size1651677.177	ATP synthase subunit b, chloroplastic	noEC	U	AT4G32260.1	ATPase%2C_F0_complex%2C_subunit_B/B%2C_bacterial/chloroplast
TEST	evm.model.scaffold3_size1784162.75	ATP synthase delta chain, chloroplastic	noEC	C	AT4G09650.1	F-type_H+-transporting_ATPase_subunit_delta
REFERENCE	evm.model.scaffold1603_size4267.2	Anthranilate synthase component II	EC:4.1.1.48;EC:5.3.1.24	E	AT5G48220.3	Aldolase-type_TIM_barrel_family_protein
REFERENCE	evm.model.scaffold1544_size5385.1	OSJNBb0118P14.7 protein	EC:1.6.99.3	GM	AT1G32220.1	NAD(P)-binding_Rossmann-fold_superfamily_protein
REFERENCE	evm.model.scaffold1528_size5622.2	Phosphoglycerate kinase	EC:2.7.2.3	G	AT1G56190.1	Phosphoglycerate_kinase_family_protein
REFERENCE	evm.model.scaffold1524_size5672.1	Chlorophyll a-b binding protein, chloroplastic	noEC	C	AT5G01530.1	light_harvesting_complex_photosystem_II
REFERENCE	evm.model.scaffold1446_size6647.3	Monofunctional biosynthetic peptidoglycan transglycosylase	noEC	none	AT2G17972.1	transmembrane_protein
REFERENCE	evm.model.scaffold1440_size6702.1	Protein CURVATURE THYLAKOID 1B, chloroplastic	noEC	S	AT2G46820.2	photosystem_I_P_subunit
REFERENCE	evm.model.scaffold1357_size8139.1	RNA recognition motif domain protein	noEC	A	AT2G37220.1	RNA-binding_(RRM/RBD/RNP_motifs)_family_protein
REFERENCE	evm.model.scaffold1332_size8611.4	probable mitochondrial intermediate peptidase, mitochondrial isoform X2	EC:3.4.11;EC:3.4.24	O	AT5G51540.1	Zincin-like_metalloproteases_family_protein
REFERENCE	evm.model.scaffold1321_size8904.2	3-isopropylmalate dehydrogenase	EC:1.1.1.85	E	AT1G80560.1	isopropylmalate_dehydrogenase_2
REFERENCE	evm.model.scaffold1318_size8943.3	Serine protease SPPA, chloroplastic	EC:3.4.21	OU	AT1G73990.1	signal_peptide_peptidase
REFERENCE	evm.model.scaffold1318_size8943.1	protein CHAPERONE-LIKE PROTEIN OF POR1, chloroplastic	noEC	S	AT5G23040.2	cell_growth_defect_factor-like_protein_(DUF3353)
REFERENCE	evm.model.scaffold1300_size9405.2	photosystem I reaction center subunit V, chloroplastic-like	noEC	S	AT1G55670.1	photosystem_I_subunit_G
REFERENCE	evm.model.scaffold1294_size9512.1	Glutamine synthetase	EC:6.3.1.2	E	AT5G35630.3	glutamine_synthetase_2
REFERENCE	evm.model.scaffold1292_size9548.1	protein EMBRYO SAC DEVELOPMENT ARREST 3, chloroplastic	EC:1.8.1.8	S	AT2G34860.2	DnaJ/Hsp40_cysteine-rich_domain_superfamily_protein
REFERENCE	evm.model.scaffold1283_size9704.4	Pentatricopeptide repeat-containing protein mitochondrial	noEC	S	noTAIR	NULL
REFERENCE	evm.model.scaffold1256_size10580.1	50S ribosomal protein L4, chloroplastic	noEC	J	AT1G07320.2	ribosomal_protein_L4
REFERENCE	evm.model.scaffold1217_size11707.2	Psbp-like protein 1, chloroplastic	noEC	O	AT3G55330.1	PsbP-like_protein_1
REFERENCE	evm.model.scaffold1214_size11807.6	photosystem I reaction center subunit IV A, chloroplastic	noEC	S	AT2G20260.1	photosystem_I_subunit_E-2
REFERENCE	evm.model.scaffold1192_size13234.1	ATP synthase protein I-related protein (Fragment)	noEC	S	AT2G31040.1	ATP_synthase_protein_I-like_protein
REFERENCE	evm.model.scaffold1188_size13387.3	Serine protease SPPA, chloroplastic	EC:3.4.21	OU	AT1G73990.1	signal_peptide_peptidase
REFERENCE	evm.model.scaffold1188_size13387.1	protein CHAPERONE-LIKE PROTEIN OF POR1, chloroplastic	noEC	S	AT5G23040.2	cell_growth_defect_factor-like_protein_(DUF3353)
REFERENCE	evm.model.scaffold1178_size13989.1	Photosystem II PsbX	noEC	M	AT2G06520.1	photosystem_II_subunit_X
REFERENCE	evm.model.scaffold1176_size14172.4	Reactive intermediate deaminase a, chloroplastic	noEC	J	AT3G20390.1	endoribonuclease_L-PSP_family_protein
REFERENCE	evm.model.scaffold1144_size15427.3	protein SPA, chloroplastic	EC:5.3.4.1	S	AT1G75690.1	DnaJ/Hsp40_cysteine-rich_domain_superfamily_protein
REFERENCE	evm.model.scaffold1141_size15467.3	psbP domain-containing protein 6, chloroplastic	noEC	S	AT3G56650.1	thylakoid_lumenal_protein_(Mog1/PsbP/DUF1795-like_photosystem_II_reaction_center_PsbP_family_protein)
REFERENCE	evm.model.scaffold1136_size15778.2	Allene oxide synthase	EC:4.2.1.92	Q	AT5G42650.1	allene_oxide_synthase
REFERENCE	evm.model.scaffold1019_size23903.3	Serine protease SPPA, chloroplastic	EC:3.4.21	OU	AT1G73990.1	signal_peptide_peptidase
REFERENCE	evm.model.scaffold1019_size23903.1	protein CHAPERONE-LIKE PROTEIN OF POR1, chloroplastic	noEC	S	AT5G23040.2	cell_growth_defect_factor-like_protein_(DUF3353)
REFERENCE	evm.model.scaffold1012_size24664.2	Ribulose bisphosphate carboxylase/oxygenase activase, chloroplastic-like	noEC	O	AT1G73110.1	P-loop_containing_nucleoside_triphosphate_hydrolases_superfamily_protein
REFERENCE	evm.model.scaffold1012_size24664.1	protein TIC 40, chloroplastic	noEC	OT	AT5G16620.1	hydroxyproline-rich_glycoprotein_family_protein
REFERENCE	evm.model.scaffold971_size27813.2	Chlorophyll a-b binding protein, chloroplastic	noEC	C	AT3G61470.1	photosystem_I_light_harvesting_complex_protein
REFERENCE	evm.model.scaffold949_size30103.1	DNA mismatch repair protein MSH1, mitochondrial isoform X2	EC:3.6.1.3;EC:3.6.1.15	L	AT3G24320.1	MUTL_protein_homolog_1
REFERENCE	evm.model.scaffold943_size30680.6	sec-independent protein translocase protein TATB, chloroplastic-like isoform X4	EC:7.4.2.3;EC:7.4.2.4	U	AT5G52440.1	Bacterial_sec-independent_translocation_protein_mttA/Hcf106
REFERENCE	evm.model.scaffold931_size32507.2	Heterodimeric geranylgeranyl pyrophosphate synthase small subunit, chloroplastic	EC:1.3.1.74;EC:2.5.1.29	H	AT4G38460.1	geranylgeranyl_reductase
REFERENCE	evm.model.scaffold929_size32888.5	Localized to the inner membrane of the chloroplast	noEC	none	AT1G42960.1	inner_membrane_localized_protein
REFERENCE	evm.model.scaffold925_size33834.6	Chlorophyll a-b binding protein, chloroplastic	noEC	C	AT3G61470.1	photosystem_I_light_harvesting_complex_protein
REFERENCE	evm.model.scaffold919_size34446.5	Lipoxygenase	EC:1.13.11;EC:1.13.11.12	E	AT1G17420.1	lipoxygenase_3
REFERENCE	evm.model.scaffold915_size35427.4	Early light-induced protein 1, chloroplastic	noEC	S	AT3G22840.1	Chlorophyll_A-B_binding_family_protein
REFERENCE	evm.model.scaffold908_size36787.12	Uncharacterized protein	noEC	none	AT5G16660.1	Low-density_receptor-like_protein
REFERENCE	evm.model.scaffold904_size37068.1	rho GTPase-activating protein 7-like	noEC	T	AT5G19390.2	Rho_GTPase_activation_protein_(RhoGAP)_with_PH_domain-containing_protein
REFERENCE	evm.model.scaffold902_size37658.9	Allene oxide synthase	EC:4.2.1.92	Q	AT5G42650.1	allene_oxide_synthase
REFERENCE	evm.model.scaffold901_size37753.2	Chlorophyll a-b binding protein, chloroplastic	noEC	C	AT1G29930.1	chlorophyll_A/B_binding_protein_1
REFERENCE	evm.model.scaffold901_size37753.1	Chlorophyll a-b binding protein, chloroplastic	noEC	C	AT1G29930.1	chlorophyll_A/B_binding_protein_1
REFERENCE	evm.model.scaffold900_size37806.4	Glyceraldehyde-3-phosphate dehydrogenase	noEC	G	AT1G42970.1	glyceraldehyde-3-phosphate_dehydrogenase_B_subunit
REFERENCE	evm.model.scaffold884_size41633.1	Photosystem II reaction center PsbP family protein	noEC	S	AT3G05410.1	Photosystem_II_reaction_center_PsbP_family_protein
REFERENCE	evm.model.scaffold880_size42587.3	Protein executer 2, chloroplastic	noEC	S	AT1G27510.1	UvrB/UvrC_domain_protein_(DUF3506)
REFERENCE	evm.model.scaffold872_size43666.3	Cell division protein FtsY-like protein, chloroplastic	EC:3.6.1.15	U	AT2G45770.1	signal_recognition_particle_receptor_protein%2C_chloroplast_(FTSY)
REFERENCE	evm.model.scaffold865_size45177.4	20 kDa chaperonin, chloroplastic	noEC	O	AT5G20720.4	chaperonin_20
REFERENCE	evm.model.scaffold851_size47108.5	Stromal 70 kDa heat shock-related protein, chloroplastic	noEC	O	AT4G24280.1	chloroplast_heat_shock_protein_70-1
REFERENCE	evm.model.scaffold847_size47669.6	Phospho-2-dehydro-3-deoxyheptonate aldolase	EC:2.5.1.54	E	AT4G33510.2	3-deoxy-d-arabino-heptulosonate_7-phosphate_synthase
REFERENCE	evm.model.scaffold841_size49873.10	Chlorophyll a-b binding protein, chloroplastic	noEC	C	AT1G29930.1	chlorophyll_A/B_binding_protein_1
REFERENCE	evm.model.scaffold841_size49873.5	Nucleoid-associated protein YbaB/EbfC family	noEC	L	AT4G30620.1	Putative_BCR%2C_YbaB_family_COG0718
REFERENCE	evm.model.scaffold834_size52220.11	50S ribosomal protein L4, chloroplastic	EC:5.2.1.8	J	AT1G07320.2	ribosomal_protein_L4
REFERENCE	evm.model.scaffold818_size56322.9	magnesium protoporphyrin IX methyltransferase, chloroplastic	EC:2.1.1.11	H	AT4G25080.6	magnesium-protoporphyrin_IX_methyltransferase
REFERENCE	evm.model.scaffold810_size58437.13	Transcription factor, putative	noEC	S	AT5G47110.1	Chlorophyll_A-B_binding_family_protein
REFERENCE	evm.model.scaffold809_size58674.5	Chlorophyll synthase, chloroplastic	EC:2.5.1.62	H	AT3G51820.1	UbiA_prenyltransferase_family_protein
REFERENCE	evm.model.scaffold806_size59925.3	Protein kinase	EC:7.2.2.2	I	AT3G07700.4	Protein_kinase_superfamily_protein
REFERENCE	evm.model.scaffold801_size61522.6	Histone H4	noEC	B	AT5G59970.2	Histone_superfamily_protein
REFERENCE	evm.model.scaffold794_size63128.5	Photosystem I reaction centre subunit N	noEC	none	AT1G49975.1	photosystem_I_reaction_center_subunit_N
REFERENCE	evm.model.scaffold791_size64248.3	Histone H4	noEC	B	AT5G59970.2	Histone_superfamily_protein
REFERENCE	evm.model.scaffold782_size66320.14	Peptidylprolyl isomerase	EC:5.2.1.8	O	AT5G45680.1	FK506-binding_protein_13
REFERENCE	evm.model.scaffold781_size66705.1	Chlorophyll a-b binding protein, chloroplastic	noEC	C	AT1G29930.1	chlorophyll_A/B_binding_protein_1
REFERENCE	evm.model.scaffold774_size69362.15	Ferredoxin--NADP reductase, chloroplastic	EC:1.18.1;EC:1.18.1.2	C	AT1G20020.1	ferredoxin-NADP[+]-oxidoreductase_2
REFERENCE	evm.model.scaffold774_size69362.11	Phosphoserine aminotransferase	EC:2.6.1.52;EC:3.1.3.3	E	AT2G17630.1	Pyridoxal_phosphate_(PLP)-dependent_transferases_superfamily_protein
REFERENCE	evm.model.scaffold772_size70005.8	Photosystem II 22 kDa protein, chloroplastic	noEC	C	AT1G44575.3	Chlorophyll_A-B_binding_family_protein
REFERENCE	evm.model.scaffold752_size77146.3	thioredoxin-like protein CITRX, chloroplastic	EC:5.3.4.1;EC:1.8.1.9;EC:1.8.1.8	C	AT3G06730.1	Thioredoxin_z
REFERENCE	evm.model.scaffold745_size79788.8	ATP-dependent Clp protease proteolytic subunit	EC:3.4.21;EC:3.6.1.3;EC:3.6.1.15	O	AT5G45390.1	CLP_protease_P4
REFERENCE	evm.model.scaffold745_size79788.3	sec-independent protein translocase protein TATA, chloroplastic-like	EC:7.4.2.3;EC:7.4.2.4	U	AT5G28750.1	Bacterial_sec-independent_translocation_protein_mttA/Hcf106
REFERENCE	evm.model.scaffold744_size79833.10	Chlorophyll a-b binding protein, chloroplastic	noEC	P	AT1G29930.1	chlorophyll_A/B_binding_protein_1
REFERENCE	evm.model.scaffold742_size80456.15	Superoxide dismutase	EC:1.15.1.1	P	AT5G23310.1	Fe_superoxide_dismutase_3
REFERENCE	evm.model.scaffold742_size80456.14	Chlorophyll A-B binding protein	noEC	O	AT3G12345.1	FKBP-type_peptidyl-prolyl_cis-trans_isomerase
REFERENCE	evm.model.scaffold741_size80477.18	lipoxygenase homology domain-containing protein 1-like	noEC	S	AT4G39730.1	Lipase/lipooxygenase%2C_PLAT/LH2_family_protein
REFERENCE	evm.model.scaffold740_size80664.9	Mitochodrial transcription termination factor-related protein	noEC	K	AT4G38160.4	Mitochondrial_transcription_termination_factor_family_protein
REFERENCE	evm.model.scaffold734_size82491.3	Lipoxygenase	EC:1.13.11;EC:1.13.11.12	E	noTAIR	NULL
REFERENCE	evm.model.scaffold724_size89489.17	oxygen-evolving enhancer protein 3-2, chloroplastic-like	noEC	S	AT4G05180.2	photosystem_II_subunit_Q-2
REFERENCE	evm.model.scaffold721_size90222.13	protein EMBRYO SAC DEVELOPMENT ARREST 3, chloroplastic	EC:1.8.1.8	S	AT2G34860.2	DnaJ/Hsp40_cysteine-rich_domain_superfamily_protein
REFERENCE	evm.model.scaffold719_size90700.7	probable plastid-lipid-associated protein 6, chloroplastic	noEC	S	AT3G23400.1	Plastid-lipid_associated_protein_PAP_/_fibrillin_family_protein
REFERENCE	evm.model.scaffold717_size90790.14	Endoribonuclease E-like protein	noEC	C	AT4G37920.1	endoribonuclease_E-like_protein
REFERENCE	evm.model.scaffold712_size91892.24	ATP-dependent Clp protease proteolytic subunit	EC:3.4.21;EC:3.6.1.3;EC:3.6.1.15	O	AT1G66670.1	CLP_protease_proteolytic_subunit_3
REFERENCE	evm.model.scaffold711_size92162.15	Cytochrome b6-f complex subunit 7	noEC	S	AT2G26500.2	cytochrome_b6f_complex_subunit_(petM)
REFERENCE	evm.model.scaffold708_size93858.4	cytochrome b5-like	EC:1.6.2.2	C	AT5G53560.1	cytochrome_B5_isoform_E
REFERENCE	evm.model.scaffold703_size94923.9	Peptidylprolyl isomerase	EC:5.2.1.8	O	AT5G13410.1	FKBP-like_peptidyl-prolyl_cis-trans_isomerase_family_protein
REFERENCE	evm.model.scaffold698_size97389.20	Protein TIC 62, chloroplastic	noEC	G	AT3G18890.1	NAD(P)-binding_Rossmann-fold_superfamily_protein
REFERENCE	evm.model.scaffold694_size97836.26	UPF0187 protein At3g61320, chloroplastic-like	noEC	S	AT3G61320.1	Bestrophin-like_protein
REFERENCE	evm.model.scaffold690_size98446.21	thioredoxin-like protein CITRX, chloroplastic	EC:5.3.4.1;EC:1.8.1.9;EC:1.8.1.8	C	AT3G06730.1	Thioredoxin_z
REFERENCE	evm.model.scaffold684_size103286.8	30S ribosomal protein 3, chloroplastic	noEC	J	AT1G68590.1	Ribosomal_protein_PSRP-3/Ycf65
REFERENCE	evm.model.scaffold679_size106169.19	PsbP domain-containing protein 4, chloroplastic	noEC	S	AT1G77090.1	thylakoid_lumenal_protein_(Mog1/PsbP/DUF1795-like_photosystem_II_reaction_center_PsbP_family_protein)
REFERENCE	evm.model.scaffold675_size109163.21	ATP-dependent Clp protease proteolytic subunit	EC:3.4.21;EC:3.6.1.3;EC:3.6.1.15	O	AT1G12410.1	CLP_protease_proteolytic_subunit_2
REFERENCE	evm.model.scaffold675_size109163.14	Psbp-like protein 1, chloroplastic	noEC	O	AT3G55330.1	PsbP-like_protein_1
REFERENCE	evm.model.scaffold670_size110176.21	Cytochrome b6-f complex iron-sulfur subunit	EC:1.10.9;EC:1.10.2;EC:1.10.9.1;EC:1.10.2.2	C	AT4G03280.1	photosynthetic_electron_transfer_C
REFERENCE	evm.model.scaffold668_size110816.13	Chlorophyll a-b binding protein, chloroplastic	noEC	C	AT1G29930.1	chlorophyll_A/B_binding_protein_1
REFERENCE	evm.model.scaffold668_size110816.12	Chlorophyll a-b binding protein, chloroplastic	noEC	C	AT1G29930.1	chlorophyll_A/B_binding_protein_1
REFERENCE	evm.model.scaffold668_size110816.9	GDSL esterase/lipase At5g45670-like	EC:3.1.1.1;EC:3.1.1.3	L	AT5G45670.1	GDSL-like_Lipase/Acylhydrolase_superfamily_protein
REFERENCE	evm.model.scaffold666_size111503.3	Aminomethyltransferase	EC:2.1.2.10;EC:1.17.1.8	E	AT1G11860.3	Glycine_cleavage_T-protein_family
REFERENCE	evm.model.scaffold665_size111511.6	psbP domain-containing protein 4, chloroplastic	noEC	S	AT1G77090.1	thylakoid_lumenal_protein_(Mog1/PsbP/DUF1795-like_photosystem_II_reaction_center_PsbP_family_protein)
REFERENCE	evm.model.scaffold655_size115805.27	Ferritin	EC:1.16.3.1;EC:1.16.3	P	AT5G01600.1	ferretin_1
REFERENCE	evm.model.scaffold655_size115805.12	probable envelope ADP,ATP carrier protein, chloroplastic	noEC	C	AT3G51870.1	Mitochondrial_substrate_carrier_family_protein
REFERENCE	evm.model.scaffold654_size116285.18	Chlorophyll a-b binding protein, chloroplastic	noEC	C	AT4G10340.1	light_harvesting_complex_of_photosystem_II_5
REFERENCE	evm.model.scaffold650_size116903.14	Putative lipase/lipooxygenase, PLAT/LH2 family protein	noEC	S	AT4G39730.1	Lipase/lipooxygenase%2C_PLAT/LH2_family_protein
REFERENCE	evm.model.scaffold650_size116903.3	Fructose-bisphosphate aldolase	EC:4.1.2.13	G	AT4G38970.1	fructose-bisphosphate_aldolase_2
REFERENCE	evm.model.scaffold645_size119521.35	FAD-dependent urate hydroxylase-like	noEC	C	AT2G35660.1	FAD/NAD(P)-binding_oxidoreductase_family_protein
REFERENCE	evm.model.scaffold643_size120596.3	3-isopropylmalate dehydrogenase	EC:1.1.1.85	E	AT1G31180.1	isopropylmalate_dehydrogenase_3
REFERENCE	evm.model.scaffold639_size122514.8	probable plastid-lipid-associated protein 6, chloroplastic	noEC	S	AT3G23400.1	Plastid-lipid_associated_protein_PAP_/_fibrillin_family_protein
REFERENCE	evm.model.scaffold635_size123795.33	Chlorophyll a-b binding protein, chloroplastic	noEC	C	AT5G54270.1	light-harvesting_chlorophyll_B-binding_protein_3
REFERENCE	evm.model.scaffold632_size124595.30	Lipase/lipooxygenase, PLAT/LH2	EC:1.11.1.7;EC:1.11.1.6	S	AT4G39730.1	Lipase/lipooxygenase%2C_PLAT/LH2_family_protein
REFERENCE	evm.model.scaffold624_size127768.36	rhodanese-like domain-containing protein 4, chloroplastic	EC:3.2.1.14	S	AT4G01050.1	thylakoid_rhodanese-like_protein
REFERENCE	evm.model.scaffold624_size127768.21	Peroxiredoxin	EC:1.11.1.15;EC:1.11.1.7	O	AT3G52960.1	Thioredoxin_superfamily_protein
REFERENCE	evm.model.scaffold624_size127768.19	Peroxiredoxin	EC:1.11.1.15;EC:1.11.1.7	O	AT3G52960.1	Thioredoxin_superfamily_protein
REFERENCE	evm.model.scaffold623_size127870.2	Peroxiredoxin	EC:1.11.1.15;EC:1.11.1.7	O	AT3G52960.1	Thioredoxin_superfamily_protein
REFERENCE	evm.model.scaffold621_size128310.23	chloroplast processing peptidase-like isoform X1	EC:3.4.21	O	AT3G24590.1	plastidic_type_i_signal_peptidase_1
REFERENCE	evm.model.scaffold621_size128310.13	thioredoxin Y1, chloroplastic-like	EC:1.8.1.9;EC:1.8.1.8	O	AT1G76760.1	thioredoxin_Y1
REFERENCE	evm.model.scaffold615_size129786.34	Aminomethyltransferase	EC:2.1.2.10;EC:1.17.1.8	E	AT1G11860.2	Glycine_cleavage_T-protein_family
REFERENCE	evm.model.scaffold611_size132032.11	Psbp domain-containing protein 1, chloroplastic	noEC	S	AT4G15510.1	Photosystem_II_reaction_center_PsbP_family_protein
REFERENCE	evm.model.scaffold605_size133348.36	FAD-dependent urate hydroxylase-like	noEC	C	AT4G38540.1	FAD/NAD(P)-binding_oxidoreductase_family_protein
REFERENCE	evm.model.scaffold595_size138481.11	Isocitrate dehydrogenase [NADP]	EC:1.1.1.42	C	AT5G14590.1	Isocitrate/isopropylmalate_dehydrogenase_family_protein
REFERENCE	evm.model.scaffold595_size138481.8	peptidyl-prolyl cis-trans isomerase CYP38, chloroplastic	EC:3.1.30;EC:5.2.1.8;EC:3.1.26;EC:3.1.26.4	O	AT3G01480.1	cyclophilin_38
REFERENCE	evm.model.scaffold588_size139614.23	high-light-induced protein, chloroplastic	noEC	S	AT5G02120.1	one_helix_protein
REFERENCE	evm.model.scaffold588_size139614.18	Protein plastid transcriptionally active 16, chloroplastic	noEC	G	AT3G46780.1	plastid_transcriptionally_active_16
REFERENCE	evm.model.scaffold588_size139614.7	inner membrane protein PPF-1, chloroplastic	noEC	OU	AT2G28800.1	63_kDa_inner_membrane_family_protein
REFERENCE	evm.model.scaffold579_size144847.13	Pyridoxal reductase, chloroplastic	EC:1.1.1.65	C	AT5G53580.1	NAD(P)-linked_oxidoreductase_superfamily_protein
REFERENCE	evm.model.scaffold574_size148320.22	Uncharacterized protein	noEC	S	AT4G13200.1	hypothetical_protein
REFERENCE	evm.model.scaffold574_size148320.3	50s ribosomal protein l12, chloroplastic	noEC	J	AT3G27850.1	ribosomal_protein_L12-C
REFERENCE	evm.model.scaffold572_size148818.8	fruit protein pKIWI502-like	EC:1.18.1;EC:1.18.1.2	CH	AT1G15140.1	FAD/NAD(P)-binding_oxidoreductase
REFERENCE	evm.model.scaffold567_size152524.15	ATP-dependent zinc metalloprotease	EC:3.4.24	none	AT1G56180.1	ATP-dependent_zinc_metalloprotease
REFERENCE	evm.model.scaffold565_size154525.26	20 kDa chaperonin, chloroplastic	noEC	O	AT5G20720.4	chaperonin_20
REFERENCE	evm.model.scaffold552_size162563.34	Histone H4	noEC	B	AT5G59970.2	Histone_superfamily_protein
REFERENCE	evm.model.scaffold551_size162907.12	Lipoxygenase	EC:1.13.11;EC:1.13.11.12	E	AT3G45140.1	lipoxygenase_2
REFERENCE	evm.model.scaffold551_size162907.6	Photosystem i reaction center subunit iv b, chloroplastic	noEC	S	AT2G20260.1	photosystem_I_subunit_E-2
REFERENCE	evm.model.scaffold538_size173939.22	probable L-ascorbate peroxidase 6, chloroplastic isoform X1	EC:1.11.1.5;EC:1.11.1.7;EC:1.11.1.11	E	AT1G77490.1	thylakoidal_ascorbate_peroxidase
REFERENCE	evm.model.scaffold538_size173939.3	ATP-dependent Clp protease proteolytic subunit	EC:3.4.21;EC:3.6.1.3;EC:3.6.1.15	O	AT1G02560.1	nuclear_encoded_CLP_protease_5
REFERENCE	evm.model.scaffold537_size174685.18	Peptidyl-prolyl cis-trans isomerase	EC:5.2.1.8	O	AT5G13120.2	cyclophilin_20-2
REFERENCE	evm.model.scaffold530_size179357.1	Putative oxidoreductase	EC:1.6.99.3	GM	AT1G32220.1	NAD(P)-binding_Rossmann-fold_superfamily_protein
REFERENCE	evm.model.scaffold527_size181175.19	Porphobilinogen deaminase	noEC	none	AT2G36145.1	hypothetical_protein
REFERENCE	evm.model.scaffold524_size182843.32	Oxygen-evolving enhancer protein 1, chloroplastic	noEC	S	AT3G50820.1	photosystem_II_subunit_O-2
REFERENCE	evm.model.scaffold524_size182843.28	psbP domain-containing protein 2, chloroplastic	noEC	S	AT2G28605.1	Photosystem_II_reaction_center_PsbP_family_protein
REFERENCE	evm.model.scaffold523_size183550.14	Lipoxygenase	EC:1.13.11;EC:1.13.11.12	E	AT1G17420.1	lipoxygenase_3
REFERENCE	evm.model.scaffold518_size185628.12	Chlorophyll a-b binding protein, chloroplastic	noEC	C	AT2G34430.1	light-harvesting_chlorophyll-protein_complex_II_subunit_B1
REFERENCE	evm.model.scaffold516_size186372.24	Geranylgeranyl diphosphate reductase, chloroplastic	EC:1.3.1.83	C	AT1G74470.1	Pyridine_nucleotide-disulfide_oxidoreductase_family_protein
REFERENCE	evm.model.scaffold516_size186372.9	Glutathione S-transferase	EC:2.5.1.18	O	AT2G47730.2	glutathione_S-transferase_phi_8
REFERENCE	evm.model.scaffold516_size186372.8	Glutathione S-transferase	EC:2.5.1.18	O	AT2G47730.2	glutathione_S-transferase_phi_8
REFERENCE	evm.model.scaffold516_size186372.7	Glutathione S-transferase	EC:2.5.1.18	O	AT1G02920.1	glutathione_S-transferase_7
REFERENCE	evm.model.scaffold512_size187211.59	membrane steroid-binding protein 2-like	noEC	S	AT5G52240.1	membrane_steroid_binding_protein_1
REFERENCE	evm.model.scaffold511_size188204.32	Protein EXECUTER 1, chloroplastic	noEC	S	AT4G33630.3	UvrB/UvrC_domain_protein_(DUF3506)
REFERENCE	evm.model.scaffold503_size196565.25	Chlorophyll a-b binding protein, chloroplastic	noEC	C	AT1G29930.1	chlorophyll_A/B_binding_protein_1
REFERENCE	evm.model.scaffold503_size196565.18	GDSL esterase/lipase At5g45670-like	EC:3.1.1.1;EC:3.1.1.3	L	AT5G45670.1	GDSL-like_Lipase/Acylhydrolase_superfamily_protein
REFERENCE	evm.model.scaffold498_size197487.54	Phosphoglycerate kinase	EC:2.7.2.3;EC:2.1.1.33	G	AT1G56190.2	Phosphoglycerate_kinase_family_protein
REFERENCE	evm.model.scaffold495_size198985.53	PGRL1A transmembrane protein	noEC	S	AT4G22890.4	PGR5-LIKE_A
REFERENCE	evm.model.scaffold493_size200783.14	stromal 70 kDa heat shock-related protein, chloroplastic-like	EC:3.1.30;EC:3.1.26;EC:3.1.26.4	O	AT4G24280.1	chloroplast_heat_shock_protein_70-1
REFERENCE	evm.model.scaffold488_size202194.33	Electron transport accessory protein-like domain-containing protein	noEC	S	AT2G20260.1	photosystem_I_subunit_E-2
REFERENCE	evm.model.scaffold486_size202863.13	Tetratricopeptide-like helical	noEC	none	AT3G26580.1	Tetratricopeptide_repeat_(TPR)-like_superfamily_protein
REFERENCE	evm.model.scaffold482_size205035.44	RuBisCO large subunit-binding protein subunit alpha	noEC	O	AT2G28000.1	chaperonin-60alpha
REFERENCE	evm.model.scaffold480_size206361.5	Magnesium-protoporphyrin IX monomethyl ester [oxidative] cyclase, chloroplastic (Fragment)	EC:1.14.13.81;EC:1.14.13	S	AT3G56940.1	dicarboxylate_diiron_protein%2C_putative_(Crd1)
REFERENCE	evm.model.scaffold476_size209410.44	Photosystem II subunit P-1	noEC	C	AT1G06680.1	photosystem_II_subunit_P-1
REFERENCE	evm.model.scaffold476_size209410.22	ATP-dependent zinc metalloprotease FTSH 10, mitochondrial-like isoform X1	EC:3.4.24	O	AT1G07510.1	FTSH_protease_10
REFERENCE	evm.model.scaffold476_size209410.3	Protein CURVATURE THYLAKOID 1B, chloroplastic	noEC	S	AT2G46820.2	photosystem_I_P_subunit
REFERENCE	evm.model.scaffold475_size210170.3	Chaperone protein DnaJ	noEC	O	AT1G80030.3	Molecular_chaperone_Hsp40/DnaJ_family_protein
REFERENCE	evm.model.scaffold470_size212680.9	Peptidylprolyl isomerase	EC:5.2.1.8	O	AT2G43560.1	FKBP-like_peptidyl-prolyl_cis-trans_isomerase_family_protein
REFERENCE	evm.model.scaffold470_size212680.2	rhodanese-like domain-containing protein 4, chloroplastic	EC:3.2.1.14	S	AT4G01050.1	thylakoid_rhodanese-like_protein
REFERENCE	evm.model.scaffold464_size216925.3	Localized to the inner membrane of the chloroplast	noEC	none	AT1G42960.1	inner_membrane_localized_protein
REFERENCE	evm.model.scaffold462_size217632.45	General substrate transporter	noEC	S	AT3G20660.1	organic_cation/carnitine_transporter4
REFERENCE	evm.model.scaffold462_size217632.37	protein SPA, chloroplastic	EC:5.3.4.1	S	AT1G75690.1	DnaJ/Hsp40_cysteine-rich_domain_superfamily_protein
REFERENCE	evm.model.scaffold460_size220093.54	Protein MAINTENANCE OF PSII UNDER HIGH LIGHT 1	noEC	S	AT5G07020.1	proline-rich_family_protein
REFERENCE	evm.model.scaffold458_size221370.46	Photosystem i reaction center subunit ii, chloroplastic	noEC	C	noTAIR	NULL
REFERENCE	evm.model.scaffold458_size221370.44	Imidazoleglycerol-phosphate dehydratase	EC:4.2.1.19	E	AT3G22425.2	imidazoleglycerol-phosphate_dehydratase
REFERENCE	evm.model.scaffold457_size221634.52	fruit protein pKIWI502-like	EC:1.18.1;EC:1.18.1.2	CH	AT1G15140.1	FAD/NAD(P)-binding_oxidoreductase
REFERENCE	evm.model.scaffold454_size223947.5	Protein HHL1, chloroplastic	EC:3.4.24	O	AT1G67700.5	multidrug_resistance_protein
REFERENCE	evm.model.scaffold452_size225145.49	Cytochrome b5-like heme/steroid binding domain-containing protein	noEC	S	AT3G48890.1	membrane-associated_progesterone_binding_protein_3
REFERENCE	evm.model.scaffold452_size225145.25	Thylakoid lumenal protein, chloroplastic	noEC	S	AT1G12250.2	Pentapeptide_repeat-containing_protein
REFERENCE	evm.model.scaffold451_size225693.11	red chlorophyll catabolite reductase, chloroplastic	noEC	S	AT4G37000.1	accelerated_cell_death_2_(ACD2)
REFERENCE	evm.model.scaffold447_size226588.7	stromal 70 kDa heat shock-related protein, chloroplastic	EC:1.3.1.74;EC:3.6.1.3;EC:3.6.1.15	O	AT5G49910.1	chloroplast_heat_shock_protein_70-2
REFERENCE	evm.model.scaffold444_size228446.20	pheophytinase, chloroplastic	EC:3.1.1.1	S	AT5G13800.4	pheophytinase
REFERENCE	evm.model.scaffold443_size229734.40	ALBINO3-like protein 1, chloroplastic	noEC	OU	AT1G24490.1	OxaA/YidC-like_membrane_insertion_protein
REFERENCE	evm.model.scaffold443_size229734.8	Reactive intermediate deaminase a, chloroplastic	noEC	J	AT3G20390.1	endoribonuclease_L-PSP_family_protein
REFERENCE	evm.model.scaffold441_size232911.17	lipoxygenase homology domain-containing protein 1-like	noEC	S	AT2G22170.1	Lipase/lipooxygenase%2C_PLAT/LH2_family_protein
REFERENCE	evm.model.scaffold440_size235831.19	Aminomethyltransferase	EC:3.1.30;EC:2.1.2.10;EC:3.1.26;EC:3.1.26.4	E	AT1G11860.3	Glycine_cleavage_T-protein_family
REFERENCE	evm.model.scaffold439_size236221.43	Geranylgeranyl diphosphate reductase, chloroplastic-like	EC:1.3.1.83	C	AT1G74470.1	Pyridine_nucleotide-disulfide_oxidoreductase_family_protein
REFERENCE	evm.model.scaffold436_size236557.10	Ribulose-phosphate 3-epimerase, chloroplastic	EC:5.1.3.1	G	AT5G61410.2	D-ribulose-5-phosphate-3-epimerase
REFERENCE	evm.model.scaffold432_size238105.54	Bile acid-sodium symporter/arsenical resistance protein	noEC	P	AT2G26900.1	Sodium_Bile_acid_symporter_family
REFERENCE	evm.model.scaffold432_size238105.46	Sodium/pyruvate cotransporter BASS2, chloroplastic	noEC	P	AT2G26900.1	Sodium_Bile_acid_symporter_family
REFERENCE	evm.model.scaffold432_size238105.3	Glyceraldehyde-3-phosphate dehydrogenase	EC:1.2.1.59;EC:1.2.1.12	G	AT3G26650.1	glyceraldehyde_3-phosphate_dehydrogenase_A_subunit
REFERENCE	evm.model.scaffold429_size240638.62	Inorganic pyrophosphatase	EC:3.6.1.1	C	AT5G09650.1	pyrophosphorylase_6
REFERENCE	evm.model.scaffold428_size240870.59	Phytoene desaturase	noEC	Q	AT4G14210.3	phytoene_desaturase_3
REFERENCE	evm.model.scaffold428_size240870.41	probable mitochondrial intermediate peptidase, mitochondrial isoform X1	EC:3.4.11;EC:3.4.24	O	AT5G51540.1	Zincin-like_metalloproteases_family_protein
REFERENCE	evm.model.scaffold426_size243431.39	Clathrin interactor epsin 1	noEC	F	AT5G11710.3	ENTH/VHS_family_protein
REFERENCE	evm.model.scaffold426_size243431.13	Sec-independent protein translocase protein TATA, chloroplastic	EC:7.4.2.3;EC:7.4.2.4	U	AT5G28750.1	Bacterial_sec-independent_translocation_protein_mttA/Hcf106
REFERENCE	evm.model.scaffold426_size243431.6	ATP-dependent Clp protease proteolytic subunit	EC:3.4.21;EC:3.6.1.3;EC:3.6.1.15	O	AT5G45390.1	CLP_protease_P4
REFERENCE	evm.model.scaffold424_size243908.17	Peptidylprolyl isomerase	EC:5.2.1.8	O	AT3G60370.1	FKBP-like_peptidyl-prolyl_cis-trans_isomerase_family_protein
REFERENCE	evm.model.scaffold421_size247372.54	Cleavage and polyadenylation specificity factor subunit like	noEC	S	AT5G08050.1	wiskott-aldrich_syndrome_family_protein%2C_putative_(DUF1118)
REFERENCE	evm.model.scaffold415_size249257.11	Nucleoid-associated protein YbaB/EbfC family	noEC	L	AT4G30620.1	Putative_BCR%2C_YbaB_family_COG0718
REFERENCE	evm.model.scaffold412_size250143.40	Pilus biogenesis/stability type IV	noEC	none	AT1G55480.1	protein_containing_PDZ_domain%2C_a_K-box_domain%2C_and_a_TPR_region
REFERENCE	evm.model.scaffold408_size254463.50	Protoporphyrinogen oxidase	EC:1.3.3.4	H	AT4G01690.1	Flavin_containing_amine_oxidoreductase_family
REFERENCE	evm.model.scaffold408_size254463.12	GDT1 family protein	noEC	S	AT1G64150.1	Uncharacterized_protein_family_(UPF0016)
REFERENCE	evm.model.scaffold403_size258745.54	Chlorophyll a-b binding protein, chloroplastic	noEC	C	AT3G54890.1	chlorophyll_a-b_binding_protein_6
REFERENCE	evm.model.scaffold403_size258745.24	ACT domain containing protein	noEC	S	AT5G04740.1	ACT_domain-containing_protein
REFERENCE	evm.model.scaffold401_size261616.75	Photosystem I reaction center subunit IV A	noEC	S	AT2G20260.1	photosystem_I_subunit_E-2
REFERENCE	evm.model.scaffold395_size268688.24	protein ECERIFERUM 26-like	noEC	S	AT4G13840.1	HXXXD-type_acyl-transferase_family_protein
REFERENCE	evm.model.scaffold394_size268910.38	Superoxide dismutase [fe] 2, chloroplastic	EC:1.15.1.1	P	AT5G51100.1	Fe_superoxide_dismutase_2
REFERENCE	evm.model.scaffold394_size268910.5	probable plastid-lipid-associated protein 8, chloroplastic	noEC	S	AT5G19940.1	Plastid-lipid_associated_protein_PAP_/_fibrillin_family_protein
REFERENCE	evm.model.scaffold394_size268910.3	copper-transporting ATPase PAA2, chloroplastic	EC:7.2.2.9	P	AT5G21930.2	P-type_ATPase_of_Arabidopsis_2
REFERENCE	evm.model.scaffold393_size271938.58	Histone H4	noEC	B	AT5G59970.2	Histone_superfamily_protein
REFERENCE	evm.model.scaffold393_size271938.28	Aldo/keto reductase	EC:1.1.1.65	C	AT1G06690.1	NAD(P)-linked_oxidoreductase_superfamily_protein
REFERENCE	evm.model.scaffold379_size277413.46	probable L-ascorbate peroxidase 6, chloroplastic isoform X1	EC:1.11.1.5;EC:1.11.1.7;EC:1.11.1.11	E	AT1G77490.1	thylakoidal_ascorbate_peroxidase
REFERENCE	evm.model.scaffold379_size277413.19	Localized to the inner membrane of the chloroplast	noEC	none	AT1G42960.1	inner_membrane_localized_protein
REFERENCE	evm.model.scaffold373_size281293.57	Thylakoidal processing peptidase 1, chloroplastic-like	noEC	O	AT2G30440.1	thylakoid_processing_peptide
REFERENCE	evm.model.scaffold366_size288142.19	sec-independent protein translocase protein TATB, chloroplastic-like isoform X4	EC:7.4.2.3;EC:7.4.2.4	U	AT5G52440.1	Bacterial_sec-independent_translocation_protein_mttA/Hcf106
REFERENCE	evm.model.scaffold363_size289583.62	Rho GTPase-activating protein 7	noEC	T	AT5G19390.2	Rho_GTPase_activation_protein_(RhoGAP)_with_PH_domain-containing_protein
REFERENCE	evm.model.scaffold362_size289980.65	Peptidylprolyl isomerase	EC:5.2.1.8	O	AT5G45680.1	FK506-binding_protein_13
REFERENCE	evm.model.scaffold362_size289980.39	Nucleoside diphosphate kinase	EC:2.7.4.6	F	AT4G23900.1	Nucleoside_diphosphate_kinase_family_protein
REFERENCE	evm.model.scaffold358_size295937.74	28 kDa ribonucleoprotein, chloroplastic-like	noEC	A	AT5G50250.1	chloroplast_RNA-binding_protein_31B
REFERENCE	evm.model.scaffold358_size295937.31	Cytochrome b6-f complex iron-sulfur subunit	EC:1.10.9;EC:1.10.2;EC:1.10.9.1;EC:1.10.2.2	C	AT4G03280.1	photosynthetic_electron_transfer_C
REFERENCE	evm.model.scaffold357_size296716.85	Plastocyanin	noEC	C	AT1G76100.1	plastocyanin_1
REFERENCE	evm.model.scaffold355_size298094.62	ATP synthase gamma chain, chloroplastic	noEC	C	AT4G04640.1	ATPase%2C_F1_complex%2C_gamma_subunit_protein
REFERENCE	evm.model.scaffold354_size300507.42	30S ribosomal protein 2, chloroplastic	noEC	A	AT3G52150.2	RNA-binding_(RRM/RBD/RNP_motifs)_family_protein
REFERENCE	evm.model.scaffold351_size304134.20	Protein HHL1, chloroplastic	EC:3.4.24	O	AT1G67700.4	multidrug_resistance_protein
REFERENCE	evm.model.scaffold350_size304998.65	Atp-dependent zinc metalloprotease ftsh 2, chloroplastic	EC:3.4.24;EC:3.6.1.3;EC:3.6.1.15;EC:3.6.4.3	O	AT2G30950.4	FtsH_extracellular_protease_family
REFERENCE	evm.model.scaffold348_size306083.78	Adenylate kinase	EC:2.7.4.4;EC:2.7.4.3	F	AT5G35170.1	adenylate_kinase_family_protein
REFERENCE	evm.model.scaffold344_size316065.45	Splicing factor 3b, subunit 4	noEC	A	AT2G37220.1	RNA-binding_(RRM/RBD/RNP_motifs)_family_protein
REFERENCE	evm.model.scaffold343_size316294.85	EG2771	noEC	S	AT5G14910.2	Heavy_metal_transport/detoxification_superfamily_protein
REFERENCE	evm.model.scaffold343_size316294.84	EG2771	noEC	S	AT5G14910.2	Heavy_metal_transport/detoxification_superfamily_protein
REFERENCE	evm.model.scaffold337_size319475.71	Heat shock protein DnaJ, cysteine-rich domain-containing protein	noEC	S	noTAIR	NULL
REFERENCE	evm.model.scaffold335_size320703.55	Ferredoxin--NADP reductase, chloroplastic	EC:1.18.1;EC:1.18.1.2	C	AT1G20020.1	ferredoxin-NADP[+]-oxidoreductase_2
REFERENCE	evm.model.scaffold335_size320703.47	Phosphoserine aminotransferase	EC:2.6.1.52;EC:3.1.3.3	E	AT2G17630.1	Pyridoxal_phosphate_(PLP)-dependent_transferases_superfamily_protein
REFERENCE	evm.model.scaffold335_size320703.35	ATP-dependent Clp protease proteolytic subunit	EC:3.4.21;EC:3.6.1.3;EC:3.6.1.15	O	AT1G09130.2	ATP-dependent_caseinolytic_(Clp)_protease/crotonase_family_protein
REFERENCE	evm.model.scaffold335_size320703.14	Putative NADPH:quinone reductase	noEC	C	AT4G13010.1	Oxidoreductase%2C_zinc-binding_dehydrogenase_family_protein
REFERENCE	evm.model.scaffold333_size321185.23	33 kDa ribonucleoprotein, chloroplastic	noEC	A	AT3G52380.1	chloroplast_RNA-binding_protein_33
REFERENCE	evm.model.scaffold333_size321185.22	2-cys peroxiredoxin bas1, chloroplastic	EC:1.11.1;EC:1.11.1.15;EC:1.11.1.7	O	AT5G06290.1	2-cysteine_peroxiredoxin_B
REFERENCE	evm.model.scaffold331_size322110.69	Chlorophyll a-b binding protein, chloroplastic	noEC	C	AT1G29930.1	chlorophyll_A/B_binding_protein_1
REFERENCE	evm.model.scaffold331_size322110.68	Chlorophyll a-b binding protein, chloroplastic	noEC	C	AT2G34430.1	light-harvesting_chlorophyll-protein_complex_II_subunit_B1
REFERENCE	evm.model.scaffold331_size322110.65	probable 9-cis-epoxycarotenoid dioxygenase NCED5, chloroplastic	EC:1.13.11;EC:1.13.11.51	Q	AT1G30100.1	nine-cis-epoxycarotenoid_dioxygenase_5
REFERENCE	evm.model.scaffold330_size322938.9	Mar-binding filament-like protein 1-1	noEC	K	AT3G16000.1	MAR_binding_filament-like_protein_1
REFERENCE	evm.model.scaffold329_size323464.34	Lipase/lipooxygenase, PLAT/LH2	EC:1.11.1.7;EC:1.11.1.6	S	AT4G39730.1	Lipase/lipooxygenase%2C_PLAT/LH2_family_protein
REFERENCE	evm.model.scaffold327_size324060.46	Protein disulfide isomerase pTAC5, chloroplastic	EC:5.3.4.1	S	AT4G13670.1	plastid_transcriptionally_active_5
REFERENCE	evm.model.scaffold327_size324060.38	DNA mismatch repair protein MSH1, mitochondrial isoform X2	EC:3.6.1.3;EC:3.6.1.15	L	AT3G24320.1	MUTL_protein_homolog_1
REFERENCE	evm.model.scaffold326_size324086.2	50S ribosomal protein L12, chloroplastic	noEC	J	AT3G27850.1	ribosomal_protein_L12-C
REFERENCE	evm.model.scaffold323_size325199.24	Photosystem II PsbX	noEC	M	AT2G06520.1	photosystem_II_subunit_X
REFERENCE	evm.model.scaffold322_size332738.11	Glycine cleavage system P protein	EC:1.4.4.2	E	AT4G33010.1	glycine_decarboxylase_P-protein_1
REFERENCE	evm.model.scaffold322_size332738.5	Chlorophyll a-b binding protein, chloroplastic	noEC	C	AT1G29930.1	chlorophyll_A/B_binding_protein_1
REFERENCE	evm.model.scaffold321_size333409.13	Glycine cleavage system P protein	EC:1.4.4.2	E	AT4G33010.1	glycine_decarboxylase_P-protein_1
REFERENCE	evm.model.scaffold321_size333409.7	Chlorophyll a-b binding protein, chloroplastic	noEC	C	AT1G29930.1	chlorophyll_A/B_binding_protein_1
REFERENCE	evm.model.scaffold320_size333601.54	Pilus biogenesis/stability type IV	noEC	none	AT1G55480.1	protein_containing_PDZ_domain%2C_a_K-box_domain%2C_and_a_TPR_region
REFERENCE	evm.model.scaffold320_size333601.3	probable plastid-lipid-associated protein 6, chloroplastic	noEC	S	AT3G23400.1	Plastid-lipid_associated_protein_PAP_/_fibrillin_family_protein
REFERENCE	evm.model.scaffold318_size334380.1	30S ribosomal protein 2, chloroplastic	noEC	A	AT3G52150.2	RNA-binding_(RRM/RBD/RNP_motifs)_family_protein
REFERENCE	evm.model.scaffold317_size334483.39	Lipoxygenase	EC:1.13.11;EC:1.13.11.12	E	AT3G45140.1	lipoxygenase_2
REFERENCE	evm.model.scaffold317_size334483.33	Photosystem i reaction center subunit iv b, chloroplastic	noEC	S	AT2G20260.1	photosystem_I_subunit_E-2
REFERENCE	evm.model.scaffold316_size337115.75	signal recognition particle 43 kDa protein, chloroplastic	noEC	S	AT2G47450.1	chloroplast_signal_recognition_particle_component_(CAO)
REFERENCE	evm.model.scaffold315_size338688.53	Putative e3 ubiquitin-protein ligase rf298	EC:6.3.1.2	E	AT5G35630.3	glutamine_synthetase_2
REFERENCE	evm.model.scaffold313_size338943.27	translocon-associated protein subunit alpha-like	noEC	U	AT2G16595.1	Translocon-associated_protein_(TRAP)%2C_alpha_subunit
REFERENCE	evm.model.scaffold312_size339379.80	Photosystem II D1 processing protein PSB27-H2, chloroplastic	noEC	S	AT1G05385.2	photosystem_II_11_kDa_protein-like_protein
REFERENCE	evm.model.scaffold311_size339713.48	Phosphatidate cytidylyltransferase	EC:2.7.7.41	I	AT2G45150.3	cytidinediphosphate_diacylglycerol_synthase_4
REFERENCE	evm.model.scaffold311_size339713.47	Phosphatidate cytidylyltransferase	EC:2.7.7.41	I	AT2G45150.3	cytidinediphosphate_diacylglycerol_synthase_4
REFERENCE	evm.model.scaffold310_size340163.45	Chaperone protein DnaJ	noEC	O	AT3G17830.1	Molecular_chaperone_Hsp40/DnaJ_family_protein
REFERENCE	evm.model.scaffold309_size341406.35	Stress enhanced protein 1, chloroplastic	noEC	S	AT4G34190.1	stress_enhanced_protein_1
REFERENCE	evm.model.scaffold309_size341406.3	stress enhanced protein 1, chloroplastic	noEC	S	AT4G34190.1	stress_enhanced_protein_1
REFERENCE	evm.model.scaffold304_size344087.92	protein THYLAKOID FORMATION1, chloroplastic	noEC	U	AT2G20890.1	photosystem_II_reaction_center_PSB29_protein
REFERENCE	evm.model.scaffold303_size344171.53	Adenylate kinase	EC:2.7.4.4;EC:2.7.4.3	F	AT5G35170.1	adenylate_kinase_family_protein
REFERENCE	evm.model.scaffold302_size345264.103	Glycine cleavage system P protein	EC:1.4.4.2	E	AT4G33010.1	glycine_decarboxylase_P-protein_1
REFERENCE	evm.model.scaffold301_size346720.84	rhodanese-like domain-containing protein 14, chloroplastic	noEC	L	AT4G27700.1	Rhodanese/Cell_cycle_control_phosphatase_superfamily_protein
REFERENCE	evm.model.scaffold298_size348755.40	thylakoidal processing peptidase 1, chloroplastic-like	EC:3.4.21	O	AT2G30440.1	thylakoid_processing_peptide
REFERENCE	evm.model.scaffold297_size348767.14	Rubredoxin-like domain containing protein	noEC	S	AT5G17170.2	rubredoxin_family_protein
REFERENCE	evm.model.scaffold296_size349755.93	Protein PLASTID TRANSCRIPTIONALLY ACTIVE 16, chloroplastic	noEC	G	AT3G46780.1	plastid_transcriptionally_active_16
REFERENCE	evm.model.scaffold295_size350362.65	ACT domain containing protein	noEC	S	AT5G04740.1	ACT_domain-containing_protein
REFERENCE	evm.model.scaffold294_size351170.63	Light-harvesting complex-like protein 3 isotype	noEC	S	AT4G17600.1	Chlorophyll_A-B_binding_family_protein
REFERENCE	evm.model.scaffold292_size352950.57	Bifunctional inhibitor/plant lipid transfer protein/seed storage helical domain-containing protein	noEC	S	AT2G10940.2	Bifunctional_inhibitor/lipid-transfer_protein/seed_storage_2S_albumin_superfamily_protein
REFERENCE	evm.model.scaffold292_size352950.34	Cell division protein FtsZ	EC:3.6.1.15	D	AT2G36250.3	Tubulin/FtsZ_family_protein
REFERENCE	evm.model.scaffold292_size352950.3	Photosystem II reaction center PsbP family protein	noEC	S	AT1G77090.1	thylakoid_lumenal_protein_(Mog1/PsbP/DUF1795-like_photosystem_II_reaction_center_PsbP_family_protein)
REFERENCE	evm.model.scaffold291_size352991.55	Mg-protoporphyrin IX chelatase	EC:6.6.1.1	Z	AT1G08520.1	ALBINA_1
REFERENCE	evm.model.scaffold291_size352991.8	Carbonic anhydrase	EC:4.2.1.1	P	AT5G14740.9	carbonic_anhydrase_2
REFERENCE	evm.model.scaffold288_size356667.20	Chloride channel protein	noEC	P	AT4G35440.1	chloride_channel_E
REFERENCE	evm.model.scaffold288_size356667.6	Formate dehydrogenase, mitochondrial	EC:1.2.1.2	C	AT5G14780.1	formate_dehydrogenase
REFERENCE	evm.model.scaffold285_size358112.28	Pentatricopeptide repeat-containing protein	noEC	S	AT2G37230.1	Tetratricopeptide_repeat_(TPR)-like_superfamily_protein
REFERENCE	evm.model.scaffold284_size359695.3	ACT domain-containing protein DS12, chloroplastic	noEC	S	AT1G16880.1	uridylyltransferase-like_protein
REFERENCE	evm.model.scaffold283_size361165.50	thioredoxin Y1, chloroplastic-like	EC:1.8.1.9;EC:1.8.1.8	O	AT1G76760.1	thioredoxin_Y1
REFERENCE	evm.model.scaffold283_size361165.11	Abelson tyrosine-protein kinase	noEC	none	AT5G42765.1	plasma_membrane_fusion_protein
REFERENCE	evm.model.scaffold280_size365250.89	Chlorophyll a-b binding protein, chloroplastic	noEC	P	AT3G47470.1	light-harvesting_chlorophyll-protein_complex_I_subunit_A4
REFERENCE	evm.model.scaffold278_size365576.38	30S ribosomal protein S6 alpha, chloroplastic	noEC	J	AT1G64510.1	Translation_elongation_factor_EF1B/ribosomal_protein_S6_family_protein
REFERENCE	evm.model.scaffold276_size366521.61	Dihydrolipoamide acetyltransferase component of pyruvate dehydrogenase complex	EC:2.3.1.38;EC:2.3.1.12	C	AT3G25860.1	2-oxoacid_dehydrogenases_acyltransferase_family_protein
REFERENCE	evm.model.scaffold276_size366521.26	30S ribosomal protein S6 alpha, chloroplastic	noEC	J	AT1G64510.1	Translation_elongation_factor_EF1B/ribosomal_protein_S6_family_protein
REFERENCE	evm.model.scaffold272_size369917.19	Protein MAINTENANCE OF PSII UNDER HIGH LIGHT 1	noEC	S	AT5G07020.1	proline-rich_family_protein
REFERENCE	evm.model.scaffold271_size370178.68	Protein EXECUTER 1, chloroplastic	noEC	S	noTAIR	NULL
REFERENCE	evm.model.scaffold271_size370178.39	50S ribosomal protein 5, chloroplastic	noEC	J	noTAIR	NULL
REFERENCE	evm.model.scaffold266_size374472.30	divinyl chlorophyllide a 8-vinyl-reductase, chloroplastic	EC:1.3.1.75	G	AT5G18660.1	NAD(P)-binding_Rossmann-fold_superfamily_protein
REFERENCE	evm.model.scaffold266_size374472.7	Nucleoid-associated protein YbaB/EbfC family	noEC	L	AT4G30620.1	Putative_BCR%2C_YbaB_family_COG0718
REFERENCE	evm.model.scaffold266_size374472.2	Chlorophyll a-b binding protein, chloroplastic	noEC	C	AT1G29930.1	chlorophyll_A/B_binding_protein_1
REFERENCE	evm.model.scaffold266_size374472.1	Chlorophyll a-b binding protein, chloroplastic	noEC	C	AT1G29930.1	chlorophyll_A/B_binding_protein_1
REFERENCE	evm.model.scaffold265_size376597.76	Chlorophyll a-b binding protein, chloroplastic (Fragment)	noEC	C	AT1G61520.3	PSI_type_III_chlorophyll_a/b-binding_protein
REFERENCE	evm.model.scaffold265_size376597.75	Chlorophyll a-b binding protein, chloroplastic (Fragment)	noEC	C	AT1G61520.2	PSI_type_III_chlorophyll_a/b-binding_protein
REFERENCE	evm.model.scaffold265_size376597.52	Histone H4	noEC	B	AT5G59970.2	Histone_superfamily_protein
REFERENCE	evm.model.scaffold264_size378400.27	EG2771	noEC	S	AT5G14910.2	Heavy_metal_transport/detoxification_superfamily_protein
REFERENCE	evm.model.scaffold261_size381946.38	protein phosphatase 2C 57	EC:3.1.3.16	T	AT4G27800.1	thylakoid-associated_phosphatase_38
REFERENCE	evm.model.scaffold260_size384151.82	Lipoxygenase	EC:1.13.11;EC:1.13.11.12	E	AT1G17420.1	lipoxygenase_3
REFERENCE	evm.model.scaffold260_size384151.75	ribulose-phosphate 3-epimerase, chloroplastic	EC:5.1.3.1	G	AT5G61410.2	D-ribulose-5-phosphate-3-epimerase
REFERENCE	evm.model.scaffold260_size384151.34	Photosystem I subunit O	noEC	S	AT1G08380.1	photosystem_I_subunit_O
REFERENCE	evm.model.scaffold256_size386676.83	Peroxiredoxin	EC:1.11.1.15;EC:1.11.1.7	O	AT3G52960.1	Thioredoxin_superfamily_protein
REFERENCE	evm.model.scaffold256_size386676.54	Uncharacterized protein	noEC	S	AT1G74730.1	transmembrane_protein%2C_putative_(DUF1118)
REFERENCE	evm.model.scaffold256_size386676.53	Uncharacterized protein	noEC	S	AT1G74730.1	transmembrane_protein%2C_putative_(DUF1118)
REFERENCE	evm.model.scaffold253_size390581.32	3-isopropylmalate dehydrogenase	EC:1.1.1.85	E	AT1G80560.1	isopropylmalate_dehydrogenase_2
REFERENCE	evm.model.scaffold251_size391187.62	protein ECERIFERUM 26-like	noEC	S	AT4G13840.1	HXXXD-type_acyl-transferase_family_protein
REFERENCE	evm.model.scaffold251_size391187.23	Putative oxidoreductase	EC:1.6.99.3	GM	AT1G32220.1	NAD(P)-binding_Rossmann-fold_superfamily_protein
REFERENCE	evm.model.scaffold249_size395244.2	high-light-induced protein, chloroplastic	noEC	S	AT5G02120.1	one_helix_protein
REFERENCE	evm.model.scaffold244_size401050.83	2-methylene-furan-3-one reductase	EC:1.3.1.105;EC:1.3.1.74;EC:1.6.5.5	C	AT1G23740.1	Oxidoreductase%2C_zinc-binding_dehydrogenase_family_protein
REFERENCE	evm.model.scaffold241_size405056.19	Protein disulfide-isomerase SCO2	EC:5.3.4.1	S	AT3G19220.1	protein_disulfide_isomerase
REFERENCE	evm.model.scaffold241_size405056.18	protein disulfide-isomerase SCO2-like isoform X2	EC:5.3.4.1	S	AT3G19220.1	protein_disulfide_isomerase
REFERENCE	evm.model.scaffold239_size408147.13	Dihydrolipoamide acetyltransferase component of pyruvate dehydrogenase complex	EC:2.3.1.38;EC:2.3.1.12	C	AT3G25860.1	2-oxoacid_dehydrogenases_acyltransferase_family_protein
REFERENCE	evm.model.scaffold237_size412359.33	Chloroplast stem-loop binding protein of 41 kDa a, chloroplastic	EC:5.1.3.2	S	AT3G63140.1	chloroplast_stem-loop_binding_protein_of_41_kDa
REFERENCE	evm.model.scaffold236_size412999.22	psbP domain-containing protein 3, chloroplastic	noEC	S	AT1G76450.1	Photosystem_II_reaction_center_PsbP_family_protein
REFERENCE	evm.model.scaffold236_size412999.2	Ribulose bisphosphate carboxylase/oxygenase activase, chloroplastic-like	noEC	O	AT1G73110.1	P-loop_containing_nucleoside_triphosphate_hydrolases_superfamily_protein
REFERENCE	evm.model.scaffold236_size412999.1	protein TIC 40, chloroplastic	noEC	OT	AT5G16620.1	hydroxyproline-rich_glycoprotein_family_protein
REFERENCE	evm.model.scaffold234_size415727.79	Sec-independent protein translocase protein TATA, chloroplastic	EC:7.4.2.3;EC:7.4.2.4	U	AT5G28750.1	Bacterial_sec-independent_translocation_protein_mttA/Hcf106
REFERENCE	evm.model.scaffold234_size415727.74	ATP-dependent Clp protease proteolytic subunit	EC:3.4.21	O	AT5G45390.1	CLP_protease_P4
REFERENCE	evm.model.scaffold233_size415906.87	2-methylene-furan-3-one reductase	EC:1.3.1.105;EC:1.3.1.74;EC:1.6.5.5	C	AT1G23740.1	Oxidoreductase%2C_zinc-binding_dehydrogenase_family_protein
REFERENCE	evm.model.scaffold231_size422325.103	Plastocyanin	noEC	C	AT1G76100.1	plastocyanin_1
REFERENCE	evm.model.scaffold227_size428916.92	inner membrane protein PPF-1, chloroplastic	noEC	OU	AT2G28800.1	63_kDa_inner_membrane_family_protein
REFERENCE	evm.model.scaffold225_size433522.31	Oxygen-evolving enhancer protein 2, chloroplastic	noEC	S	AT1G06680.1	photosystem_II_subunit_P-1
REFERENCE	evm.model.scaffold223_size435064.52	Chlorophyll a-b binding protein, chloroplastic	noEC	P	AT5G01530.1	light_harvesting_complex_photosystem_II
REFERENCE	evm.model.scaffold221_size436046.13	Signal recognition particle 43 kDa protein, chloroplastic	noEC	S	AT2G47450.1	chloroplast_signal_recognition_particle_component_(CAO)
REFERENCE	evm.model.scaffold218_size439493.63	Chlorophyll a-b binding protein, chloroplastic	EC:3.1.1.73;EC:3.1.1.1	I	AT3G47560.4	alpha/beta-Hydrolases_superfamily_protein
REFERENCE	evm.model.scaffold217_size439810.40	photosystem I reaction center subunit V, chloroplastic-like	noEC	S	AT1G55670.1	photosystem_I_subunit_G
REFERENCE	evm.model.scaffold217_size439810.39	photosystem I reaction center subunit V, chloroplastic-like	noEC	S	AT1G55670.1	photosystem_I_subunit_G
REFERENCE	evm.model.scaffold216_size441981.76	Rhodanese-like domain-containing protein 10	noEC	S	AT3G08920.1	Rhodanese/Cell_cycle_control_phosphatase_superfamily_protein
REFERENCE	evm.model.scaffold216_size441981.26	Alpha/beta hydrolase fold	EC:3.1.1.1	S	AT5G13800.2	pheophytinase
REFERENCE	evm.model.scaffold215_size442783.53	Glutathione S-transferase	EC:2.5.1.18	O	AT2G47730.2	glutathione_S-transferase_phi_8
REFERENCE	evm.model.scaffold215_size442783.51	Glutathione S-transferase	EC:2.5.1.18	O	AT2G47730.2	glutathione_S-transferase_phi_8
REFERENCE	evm.model.scaffold215_size442783.50	Glutathione S-transferase	EC:2.5.1.18	O	AT2G47730.2	glutathione_S-transferase_phi_8
REFERENCE	evm.model.scaffold215_size442783.47	Glutathione S-transferase	EC:2.5.1.18	O	AT2G47730.2	glutathione_S-transferase_phi_8
REFERENCE	evm.model.scaffold213_size443723.58	Pheophorbide a oxygenase, chloroplastic	EC:1.13.12;EC:1.14.13.122;EC:1.14.15.17	P	AT3G44880.1	Pheophorbide_a_oxygenase_family_protein_with_Rieske_2Fe-2S_domain-containing_protein
REFERENCE	evm.model.scaffold210_size448060.5	50S ribosomal protein L14, chloroplastic	noEC	J	ATCG00780.1	ribosomal_protein_L14
REFERENCE	evm.model.scaffold210_size448060.4	Photosystem II CP47 reaction center protein	noEC	C	ATCG00680.1	photosystem_II_reaction_center_protein_B
REFERENCE	evm.model.scaffold209_size449185.48	Geranyl diphosphate synthase small subunit	EC:2.5.1.1	H	AT4G38460.1	geranylgeranyl_reductase
REFERENCE	evm.model.scaffold208_size452143.3	Divinyl chlorophyllide a 8-vinyl-reductase, chloroplastic	noEC	G	AT5G18660.1	NAD(P)-binding_Rossmann-fold_superfamily_protein
REFERENCE	evm.model.scaffold207_size453297.47	Plastocyanin	noEC	C	AT1G76100.1	plastocyanin_1
REFERENCE	evm.model.scaffold207_size453297.27	Uncharacterized protein	noEC	S	AT4G13200.1	hypothetical_protein
REFERENCE	evm.model.scaffold206_size458013.98	Glutathione S-transferase	EC:2.5.1.18	O	AT1G02920.1	glutathione_S-transferase_7
REFERENCE	evm.model.scaffold206_size458013.96	Glutathione S-transferase	EC:2.5.1.18	O	AT2G47730.2	glutathione_S-transferase_phi_8
REFERENCE	evm.model.scaffold206_size458013.94	Glutathione S-transferase	EC:2.5.1.18	O	AT2G47730.2	glutathione_S-transferase_phi_8
REFERENCE	evm.model.scaffold204_size461939.114	33 kDa ribonucleoprotein, chloroplastic	noEC	A	AT3G52380.1	chloroplast_RNA-binding_protein_33
REFERENCE	evm.model.scaffold203_size463369.13	30s ribosomal protein s5, chloroplastic	noEC	J	AT2G33800.1	Ribosomal_protein_S5_family_protein
REFERENCE	evm.model.scaffold202_size463854.8	Fructose-bisphosphate aldolase	EC:4.1.2.13	G	AT4G38970.1	fructose-bisphosphate_aldolase_2
REFERENCE	evm.model.scaffold198_size466070.1	Chaperone protein DnaJ 1	EC:5.3.4.1	S	AT4G13670.1	plastid_transcriptionally_active_5
REFERENCE	evm.model.scaffold197_size466181.96	Histone H4	noEC	B	AT5G59970.2	Histone_superfamily_protein
REFERENCE	evm.model.scaffold196_size466988.129	calmodulin-interacting protein 111 isoform X1	EC:3.6.1.3;EC:3.6.1.15	O	AT3G56690.1	Cam_interacting_protein_111
REFERENCE	evm.model.scaffold196_size466988.2	Localized to the inner membrane of the chloroplast	noEC	none	AT1G42960.1	inner_membrane_localized_protein
REFERENCE	evm.model.scaffold191_size479834.26	Putative ovule protein	noEC	S	AT5G08540.1	ribosomal_RNA_small_subunit_methyltransferase_J
REFERENCE	evm.model.scaffold190_size480112.102	Ferritin	EC:1.16.3.1;EC:1.16.3	P	AT5G01600.1	ferretin_1
REFERENCE	evm.model.scaffold190_size480112.10	Photosystem II reaction center PsbP family protein	noEC	S	AT1G77090.1	thylakoid_lumenal_protein_(Mog1/PsbP/DUF1795-like_photosystem_II_reaction_center_PsbP_family_protein)
REFERENCE	evm.model.scaffold189_size480584.103	Polyphenol oxidase	EC:1.10.3;EC:1.10.3.1	Q	noTAIR	NULL
REFERENCE	evm.model.scaffold189_size480584.13	Chlorophyll a-b binding protein, chloroplastic	noEC	P	AT3G47470.1	light-harvesting_chlorophyll-protein_complex_I_subunit_A4
REFERENCE	evm.model.scaffold188_size480585.76	NADPH-protochlorophyllide oxidoreductase	EC:1.6.99.1;EC:1.3.1.33	Q	AT1G03630.2	protochlorophyllide_oxidoreductase_C
REFERENCE	evm.model.scaffold187_size480904.111	Phospho-2-dehydro-3-deoxyheptonate aldolase	EC:2.5.1.54	E	AT4G33510.1	3-deoxy-d-arabino-heptulosonate_7-phosphate_synthase
REFERENCE	evm.model.scaffold185_size485439.86	Chlorophyll A-B binding protein	noEC	S	AT4G28025.2	hypothetical_protein
REFERENCE	evm.model.scaffold185_size485439.50	Serine protease SPPA, chloroplastic	EC:3.4.21	OU	AT1G73990.1	signal_peptide_peptidase
REFERENCE	evm.model.scaffold185_size485439.48	protein CHAPERONE-LIKE PROTEIN OF POR1, chloroplastic	noEC	S	AT5G23040.2	cell_growth_defect_factor-like_protein_(DUF3353)
REFERENCE	evm.model.scaffold185_size485439.47	calcium sensing receptor, chloroplastic	noEC	V	AT5G23060.1	calcium_sensing_receptor
REFERENCE	evm.model.scaffold184_size485503.54	Chlorophyll synthase	EC:2.5.1.62	H	AT3G51820.1	UbiA_prenyltransferase_family_protein
REFERENCE	evm.model.scaffold183_size488004.2	probable plastid-lipid-associated protein 8, chloroplastic	noEC	S	AT5G19940.1	Plastid-lipid_associated_protein_PAP_/_fibrillin_family_protein
REFERENCE	evm.model.scaffold182_size489013.60	photosystem II reaction center W protein, chloroplastic-like	noEC	S	AT2G30570.1	photosystem_II_reaction_center_W
REFERENCE	evm.model.scaffold182_size489013.25	membrane steroid-binding protein 2-like	EC:1.3.1.74	J	AT3G48890.1	membrane-associated_progesterone_binding_protein_3
REFERENCE	evm.model.scaffold181_size493926.91	Protein PLASTID TRANSCRIPTIONALLY ACTIVE 16, chloroplastic	noEC	G	AT3G46780.1	plastid_transcriptionally_active_16
REFERENCE	evm.model.scaffold178_size500592.53	Putative lipase/lipooxygenase, PLAT/LH2 family protein	noEC	S	AT4G39730.1	Lipase/lipooxygenase%2C_PLAT/LH2_family_protein
REFERENCE	evm.model.scaffold176_size503880.73	NADPH-protochlorophyllide oxidoreductase	EC:1.3.1.33	Q	AT5G54190.1	protochlorophyllide_oxidoreductase_A
REFERENCE	evm.model.scaffold175_size507515.75	Chlorophyll a-b binding protein, chloroplastic	noEC	P	AT1G76570.1	Chlorophyll_A-B_binding_family_protein
REFERENCE	evm.model.scaffold173_size512803.76	stromal 70 kDa heat shock-related protein, chloroplastic	EC:3.6.1.3;EC:3.6.1.15	O	AT4G24280.1	chloroplast_heat_shock_protein_70-1
REFERENCE	evm.model.scaffold173_size512803.75	Stromal 70 kDa heat shock-related protein chloroplastic-like (Fragment)	EC:1.3.1.74;EC:3.6.1.3;EC:3.6.1.15	O	AT5G49910.1	chloroplast_heat_shock_protein_70-2
REFERENCE	evm.model.scaffold172_size512938.38	magnesium-protoporphyrin IX monomethyl ester [oxidative] cyclase, chloroplastic	EC:1.14.13.81;EC:1.14.13	S	AT3G56940.1	dicarboxylate_diiron_protein%2C_putative_(Crd1)
REFERENCE	evm.model.scaffold171_size516701.36	Chlorophyll synthase	noEC	H	noTAIR	NULL
REFERENCE	evm.model.scaffold169_size519396.21	Protein TIC 20-v, chloroplastic	noEC	S	AT5G55710.1	TIC_20-v-like_protein
REFERENCE	evm.model.scaffold168_size520293.36	Photosystem II PsbX	noEC	M	AT2G06520.1	photosystem_II_subunit_X
REFERENCE	evm.model.scaffold165_size523336.101	ATP-dependent Clp protease proteolytic subunit	EC:3.4.21;EC:3.6.1.3;EC:3.6.1.15	O	AT1G66670.1	CLP_protease_proteolytic_subunit_3
REFERENCE	evm.model.scaffold165_size523336.77	Allene oxide synthase	EC:4.2.1.92	Q	AT5G42650.1	allene_oxide_synthase
REFERENCE	evm.model.scaffold160_size534036.93	rhodanese-like domain-containing protein 4, chloroplastic	EC:3.2.1.14	S	AT4G01050.1	thylakoid_rhodanese-like_protein
REFERENCE	evm.model.scaffold160_size534036.75	Peroxiredoxin	EC:1.11.1.15;EC:1.11.1.7	O	AT3G52960.1	Thioredoxin_superfamily_protein
REFERENCE	evm.model.scaffold160_size534036.73	Splicing factor 3b, subunit 4	noEC	A	AT2G37220.1	RNA-binding_(RRM/RBD/RNP_motifs)_family_protein
REFERENCE	evm.model.scaffold157_size542792.8	Carboxyl-terminal-processing peptidase 2, chloroplastic	noEC	M	AT4G17740.2	Peptidase_S41_family_protein
REFERENCE	evm.model.scaffold155_size543531.131	probable 9-cis-epoxycarotenoid dioxygenase NCED5, chloroplastic	EC:1.13.11;EC:1.13.11.51	Q	AT1G30100.1	nine-cis-epoxycarotenoid_dioxygenase_5
REFERENCE	evm.model.scaffold155_size543531.125	GDSL esterase/lipase At5g45670-like	EC:3.1.1.1;EC:3.1.1.3	L	AT5G45670.1	GDSL-like_Lipase/Acylhydrolase_superfamily_protein
REFERENCE	evm.model.scaffold155_size543531.51	chaperone protein dnaJ A6, chloroplastic-like	noEC	O	AT2G22360.1	DNAJ_heat_shock_family_protein
REFERENCE	evm.model.scaffold155_size543531.14	probable inactive ATP-dependent zinc metalloprotease FTSHI 4, chloroplastic	EC:3.4.24;EC:3.6.1.3;EC:3.6.3.52;EC:7.4.2.5;EC:3.6.1.15	O	AT5G64580.1	AAA-type_ATPase_family_protein
REFERENCE	evm.model.scaffold155_size543531.9	Zeaxanthin epoxidase, chloroplastic	EC:1.14.13.90;EC:1.14.13	C	AT5G67030.1	zeaxanthin_epoxidase_(ZEP)_(ABA1)
REFERENCE	evm.model.scaffold154_size551747.33	protein CURVATURE THYLAKOID 1A, chloroplastic-like	noEC	S	AT4G01150.1	CURVATURE_THYLAKOID_1A-like_protein
REFERENCE	evm.model.scaffold151_size559051.39	Protein translocase subunit SecA	EC:3.6.1.3;EC:7.4.2.3;EC:7.4.2.4;EC:7.4.2.5;EC:3.6.1.15	C	AT4G01800.3	Albino_or_Glassy_Yellow_1
REFERENCE	evm.model.scaffold150_size559803.90	Cytochrome b6-f complex subunit 7	noEC	S	AT2G26500.2	cytochrome_b6f_complex_subunit_(petM)
REFERENCE	evm.model.scaffold150_size559803.78	Protein CURVATURE THYLAKOID 1A, chloroplastic	noEC	S	AT4G01150.1	CURVATURE_THYLAKOID_1A-like_protein
REFERENCE	evm.model.scaffold148_size560834.57	Thioredoxin-like protein HCF164, chloroplastic	EC:5.3.4.1;EC:1.8.1.9;EC:1.8.1.8	O	AT4G37200.1	Thioredoxin_superfamily_protein
REFERENCE	evm.model.scaffold148_size560834.48	Photosystem II 22 kDa protein, chloroplastic	noEC	C	AT1G44575.3	Chlorophyll_A-B_binding_family_protein
REFERENCE	evm.model.scaffold148_size560834.41	chaperone protein dnaJ A6, chloroplastic-like	noEC	O	AT2G22360.1	DNAJ_heat_shock_family_protein
REFERENCE	evm.model.scaffold145_size568489.163	Dicarboxylate transporter 2.1, chloroplastic	noEC	P	AT5G64290.1	dicarboxylate_transport_2.1
REFERENCE	evm.model.scaffold144_size572261.138	Oxygen-evolving enhancer protein 1, chloroplastic	noEC	S	AT3G50820.1	photosystem_II_subunit_O-2
REFERENCE	evm.model.scaffold144_size572261.123	membrane steroid-binding protein 2-like	noEC	S	AT5G52240.1	membrane_steroid_binding_protein_1
REFERENCE	evm.model.scaffold143_size572353.71	Calmodulin-interacting protein	EC:3.6.1.3;EC:3.6.1.15	O	AT3G56690.1	Cam_interacting_protein_111
REFERENCE	evm.model.scaffold143_size572353.55	protein EXECUTER 1, chloroplastic	noEC	S	AT4G33630.3	UvrB/UvrC_domain_protein_(DUF3506)
REFERENCE	evm.model.scaffold141_size577029.33	Oxygen-evolving enhancer protein 2, chloroplastic	noEC	C	AT1G06680.1	photosystem_II_subunit_P-1
REFERENCE	evm.model.scaffold136_size581398.66	Sanguinarine reductase	noEC	G	AT2G37660.1	NAD(P)-binding_Rossmann-fold_superfamily_protein
REFERENCE	evm.model.scaffold135_size590554.168	Calcium homeostasis regulator CHoR1	noEC	S	AT3G55250.1	calcium_homeostasis_regulator
REFERENCE	evm.model.scaffold135_size590554.166	Protease do-like 1, chloroplastic	EC:3.4.21	O	AT3G27925.2	DegP_protease_1
REFERENCE	evm.model.scaffold134_size590630.158	peptidyl-prolyl cis-trans isomerase CYP37, chloroplastic	EC:5.2.1.8	O	AT3G15520.3	Cyclophilin-like_peptidyl-prolyl_cis-trans_isomerase_family_protein
REFERENCE	evm.model.scaffold132_size599623.91	Photosystem II 5 kDa protein, chloroplastic	noEC	S	AT3G21055.1	photosystem_II_subunit_T
REFERENCE	evm.model.scaffold132_size599623.46	Uncharacterized protein	noEC	none	AT5G16660.1	Low-density_receptor-like_protein
REFERENCE	evm.model.scaffold131_size602077.52	Glutathione peroxidase	EC:1.11.1.9;EC:1.11.1.7	O	AT4G31870.1	glutathione_peroxidase_7
REFERENCE	evm.model.scaffold130_size602244.97	Photosystem ii 10 kDa polypeptide, chloroplastic	noEC	S	AT1G79040.1	photosystem_II_subunit_R
REFERENCE	evm.model.scaffold129_size605804.19	Chlorophyll a-b binding protein, chloroplastic	noEC	C	AT1G15820.1	light_harvesting_complex_photosystem_II_subunit_6
REFERENCE	evm.model.scaffold128_size606351.96	PGR5-like protein 1A, chloroplastic	noEC	S	AT4G22890.3	PGR5-LIKE_A
REFERENCE	evm.model.scaffold126_size606685.95	Ubiquinol oxidase	EC:1.10.3.11;EC:1.10.3	Q	AT4G22260.1	Alternative_oxidase_family_protein
REFERENCE	evm.model.scaffold125_size608205.84	Annexin	EC:3.6.1.3;EC:3.6.1.15;EC:1.11.1.7	U	AT1G35720.1	annexin_1
REFERENCE	evm.model.scaffold125_size608205.43	photosystem II reaction center W protein, chloroplastic-like	noEC	S	AT2G30570.1	photosystem_II_reaction_center_W
REFERENCE	evm.model.scaffold124_size609810.2	Rho GTPase-activating protein 7	noEC	T	AT5G19390.2	Rho_GTPase_activation_protein_(RhoGAP)_with_PH_domain-containing_protein
REFERENCE	evm.model.scaffold121_size616638.18	Glycine cleavage system H protein	noEC	E	AT1G32470.1	Single_hybrid_motif_superfamily_protein
REFERENCE	evm.model.scaffold121_size616638.9	Cytochrome P450 CYP2 subfamily	noEC	A	AT4G24770.2	31-kDa_RNA_binding_protein
REFERENCE	evm.model.scaffold120_size617610.155	Chlorophyll a-b binding protein, chloroplastic	noEC	P	AT1G29930.1	chlorophyll_A/B_binding_protein_1
REFERENCE	evm.model.scaffold120_size617610.154	Chlorophyll a-b binding protein, chloroplastic	noEC	C	AT2G34430.1	light-harvesting_chlorophyll-protein_complex_II_subunit_B1
REFERENCE	evm.model.scaffold120_size617610.100	Zeaxanthin epoxidase, chloroplastic	EC:1.14.13.90;EC:1.14.13	C	AT5G67030.1	zeaxanthin_epoxidase_(ZEP)_(ABA1)
REFERENCE	evm.model.scaffold120_size617610.97	Polyphenol oxidase	EC:1.10.3;EC:1.10.3.1	Q	noTAIR	NULL
REFERENCE	evm.model.scaffold120_size617610.90	Dicarboxylate transporter 2.1, chloroplastic-like	noEC	P	AT5G64290.1	dicarboxylate_transport_2.1
REFERENCE	evm.model.scaffold120_size617610.31	30S ribosomal protein 3, chloroplastic	noEC	J	AT5G15760.1	Ribosomal_protein_PSRP-3/Ycf65
REFERENCE	evm.model.scaffold118_size635519.20	Phospho-2-dehydro-3-deoxyheptonate aldolase	EC:2.5.1.54	E	AT4G33510.1	3-deoxy-d-arabino-heptulosonate_7-phosphate_synthase
REFERENCE	evm.model.scaffold117_size639039.96	Protease do-like 2, chloroplastic	EC:3.4.21;EC:1.3.1.74	O	AT2G47940.2	DEGP_protease_2
REFERENCE	evm.model.scaffold117_size639039.57	Glutamine synthetase	EC:6.3.1.2	E	AT5G35630.3	glutamine_synthetase_2
REFERENCE	evm.model.scaffold116_size639307.109	photosystem II core complex proteins psbY, chloroplastic-like	noEC	S	AT1G67740.1	photosystem_II_BY
REFERENCE	evm.model.scaffold114_size641222.51	Enoyl-ACP Reductase	EC:2.3.1.85;EC:1.3.1.9	Q	AT2G05990.2	NAD(P)-binding_Rossmann-fold_superfamily_protein
REFERENCE	evm.model.scaffold112_size645884.121	Phosphatidate cytidylyltransferase	EC:2.7.7.41	I	AT2G45150.3	cytidinediphosphate_diacylglycerol_synthase_4
REFERENCE	evm.model.scaffold112_size645884.105	Sodium/pyruvate cotransporter BASS2, chloroplastic	noEC	P	AT2G26900.1	Sodium_Bile_acid_symporter_family
REFERENCE	evm.model.scaffold111_size649699.126	NHL repeat-containing protein 2	noEC	O	AT1G56500.1	haloacid_dehalogenase-like_hydrolase_family_protein
REFERENCE	evm.model.scaffold111_size649699.65	Glutathione S-transferase	EC:2.5.1.18	O	AT2G47730.2	glutathione_S-transferase_phi_8
REFERENCE	evm.model.scaffold111_size649699.64	Glutathione S-transferase	EC:2.5.1.18	O	AT2G47730.2	glutathione_S-transferase_phi_8
REFERENCE	evm.model.scaffold111_size649699.62	Glutathione S-transferase	EC:2.5.1.18	O	AT2G47730.2	glutathione_S-transferase_phi_8
REFERENCE	evm.model.scaffold111_size649699.13	Photosystem II 22 kDa protein, chloroplastic	noEC	C	AT1G44575.2	Chlorophyll_A-B_binding_family_protein
REFERENCE	evm.model.scaffold110_size649966.110	Chlorophyll A-B binding protein	noEC	O	AT3G12345.1	FKBP-type_peptidyl-prolyl_cis-trans_isomerase
REFERENCE	evm.model.scaffold110_size649966.109	Superoxide dismutase	EC:1.15.1.1	P	AT5G23310.1	Fe_superoxide_dismutase_3
REFERENCE	evm.model.scaffold110_size649966.101	Protease do-like 1, chloroplastic	EC:3.4.21	O	AT3G27925.2	DegP_protease_1
REFERENCE	evm.model.scaffold110_size649966.99	Calcium homeostasis regulator CHoR1	noEC	S	AT3G55250.1	calcium_homeostasis_regulator
REFERENCE	evm.model.scaffold108_size655003.1	oxygen-evolving enhancer protein 3-2, chloroplastic-like	noEC	S	AT4G05180.2	photosystem_II_subunit_Q-2
REFERENCE	evm.model.scaffold107_size656107.33	Phosphoribulokinase	EC:2.7.1.48;EC:2.7.1.19	TZ	AT1G32060.1	phosphoribulokinase
REFERENCE	evm.model.scaffold105_size659173.147	Sanguinarine reductase	noEC	G	AT2G37660.1	NAD(P)-binding_Rossmann-fold_superfamily_protein
REFERENCE	evm.model.scaffold105_size659173.127	Peptidylprolyl isomerase	EC:5.2.1.8	O	AT3G10060.1	FKBP-like_peptidyl-prolyl_cis-trans_isomerase_family_protein
REFERENCE	evm.model.scaffold105_size659173.84	29 kDa ribonucleoprotein A, chloroplastic-like	noEC	A	AT2G37220.1	RNA-binding_(RRM/RBD/RNP_motifs)_family_protein
REFERENCE	evm.model.scaffold105_size659173.73	Cell division protein FtsZ	EC:3.6.1.15	D	AT3G52750.3	Tubulin/FtsZ_family_protein
REFERENCE	evm.model.scaffold104_size664890.150	red chlorophyll catabolite reductase, chloroplastic	noEC	S	AT4G37000.1	accelerated_cell_death_2_(ACD2)
REFERENCE	evm.model.scaffold104_size664890.119	ATP-dependent Clp protease proteolytic subunit	EC:3.4.21;EC:3.6.1.3;EC:3.6.1.15	O	AT5G45390.1	CLP_protease_P4
REFERENCE	evm.model.scaffold104_size664890.114	sec-independent protein translocase protein TATA, chloroplastic-like	EC:7.4.2.3;EC:7.4.2.4	U	AT5G28750.1	Bacterial_sec-independent_translocation_protein_mttA/Hcf106
REFERENCE	evm.model.scaffold104_size664890.13	Malate dehydrogenase	EC:1.6.1.1;EC:1.1.1.37;EC:1.1.1.82	C	AT5G58330.1	lactate/malate_dehydrogenase_family_protein
REFERENCE	evm.model.scaffold102_size677817.157	Chlorophyll a-b binding protein, chloroplastic	noEC	C	AT1G61520.3	PSI_type_III_chlorophyll_a/b-binding_protein
REFERENCE	evm.model.scaffold102_size677817.139	probable 9-cis-epoxycarotenoid dioxygenase NCED5, chloroplastic	EC:1.13.11;EC:1.13.11.51	Q	AT1G30100.1	nine-cis-epoxycarotenoid_dioxygenase_5
REFERENCE	evm.model.scaffold102_size677817.132	General substrate transporter	noEC	S	AT3G20660.1	organic_cation/carnitine_transporter4
REFERENCE	evm.model.scaffold102_size677817.55	Protease Do-like 5, chloroplastic	EC:3.4.21	O	AT4G18370.1	DEGP_protease_5
REFERENCE	evm.model.scaffold102_size677817.10	Photosystem II D1 processing protein PSB27-H2, chloroplastic	noEC	S	AT1G05385.2	photosystem_II_11_kDa_protein-like_protein
REFERENCE	evm.model.scaffold102_size677817.4	Glutamine synthetase	EC:6.3.1.2	E	AT5G35630.3	glutamine_synthetase_2
REFERENCE	evm.model.scaffold101_size679088.98	Malate dehydrogenase	EC:1.6.1.1;EC:1.1.1.37;EC:1.1.1.82	C	AT5G58330.1	lactate/malate_dehydrogenase_family_protein
REFERENCE	evm.model.scaffold99_size687872.52	Peroxiredoxin Q, chloroplastic	EC:1.11.1.15;EC:1.11.1.7	O	AT3G26060.1	Thioredoxin_superfamily_protein
REFERENCE	evm.model.scaffold98_size696804.84	Photosystem i reaction center subunit ii, chloroplastic	noEC	C	AT1G03130.1	photosystem_I_subunit_D-2
REFERENCE	evm.model.scaffold98_size696804.60	ATP-dependent zinc metalloprotease FTSH 10, mitochondrial-like isoform X1	EC:3.4.24	O	AT1G07510.1	FTSH_protease_10
REFERENCE	evm.model.scaffold97_size696948.149	Putative ovule protein	noEC	S	AT1G36320.1	hypothetical_protein
REFERENCE	evm.model.scaffold97_size696948.123	Phosphoglycerate kinase	EC:2.7.2.3	G	AT1G56190.1	Phosphoglycerate_kinase_family_protein
REFERENCE	evm.model.scaffold96_size698077.72	28 kDa ribonucleoprotein, chloroplastic	noEC	A	AT5G50250.1	chloroplast_RNA-binding_protein_31B
REFERENCE	evm.model.scaffold96_size698077.62	Glycine cleavage system H protein	noEC	E	AT1G32470.1	Single_hybrid_motif_superfamily_protein
REFERENCE	evm.model.scaffold95_size706132.145	50S ribosomal protein L13, chloroplastic	noEC	J	AT1G78630.1	Ribosomal_protein_L13_family_protein
REFERENCE	evm.model.scaffold95_size706132.105	Pyridoxal reductase, chloroplastic	EC:1.1.1.65	C	AT5G53580.1	NAD(P)-linked_oxidoreductase_superfamily_protein
REFERENCE	evm.model.scaffold95_size706132.90	probable zinc metalloprotease EGY2, chloroplastic	noEC	M	AT5G05740.3	ethylene-dependent_gravitropism-deficient_and_yellow-green-like_2
REFERENCE	evm.model.scaffold95_size706132.3	Aldo/keto reductase	EC:1.1.1.65	C	AT1G06690.1	NAD(P)-linked_oxidoreductase_superfamily_protein
REFERENCE	evm.model.scaffold93_size714796.117	Dicarboxylate transporter 2.1, chloroplastic-like	noEC	P	AT5G64290.1	dicarboxylate_transport_2.1
REFERENCE	evm.model.scaffold92_size718879.98	thioredoxin-like protein HCF164, chloroplastic	EC:5.3.4.1;EC:1.8.1.9;EC:1.8.1.8	O	AT4G37200.1	Thioredoxin_superfamily_protein
REFERENCE	evm.model.scaffold91_size726399.141	Sedoheptulose-1,7-bisphosphatase, chloroplastic	EC:3.1.3.37;EC:3.1.3.23;EC:3.1.3.11	G	AT3G55800.1	sedoheptulose-bisphosphatase
REFERENCE	evm.model.scaffold87_size752611.115	Geranylgeranyl reductase	EC:1.3.1.83	C	AT1G74470.1	Pyridine_nucleotide-disulfide_oxidoreductase_family_protein
REFERENCE	evm.model.scaffold86_size753315.197	Photosystem II reaction center PsbP family protein	noEC	S	AT1G77090.1	thylakoid_lumenal_protein_(Mog1/PsbP/DUF1795-like_photosystem_II_reaction_center_PsbP_family_protein)
REFERENCE	evm.model.scaffold86_size753315.9	Chlorophyll A-B binding protein	noEC	S	AT3G22840.1	Chlorophyll_A-B_binding_family_protein
REFERENCE	evm.model.scaffold85_size755756.40	Heterodimeric geranylgeranyl pyrophosphate synthase small subunit, chloroplastic	EC:1.3.1.74	H	AT4G38460.1	geranylgeranyl_reductase
REFERENCE	evm.model.scaffold84_size759781.187	Thylakoidal processing peptidase 1, chloroplastic-like	noEC	O	AT1G06870.1	Peptidase_S24/S26A/S26B/S26C_family_protein
REFERENCE	evm.model.scaffold84_size759781.95	stromal 70 kDa heat shock-related protein, chloroplastic	EC:1.3.1.74;EC:3.6.1.3;EC:3.6.1.15	O	AT5G49910.1	chloroplast_heat_shock_protein_70-2
REFERENCE	evm.model.scaffold84_size759781.53	chloroplast processing peptidase-like isoform X1	EC:3.4.21	O	AT3G24590.1	plastidic_type_i_signal_peptidase_1
REFERENCE	evm.model.scaffold83_size766868.107	ATP synthase subunit alpha, chloroplastic	noEC	C	ATCG00120.1	ATP_synthase_subunit_alpha
REFERENCE	evm.model.scaffold82_size768308.205	Glycine cleavage system P protein	EC:1.4.4.2	E	AT4G33010.1	glycine_decarboxylase_P-protein_1
REFERENCE	evm.model.scaffold82_size768308.202	Chlorophyll a-b binding protein, chloroplastic	noEC	C	AT1G29930.1	chlorophyll_A/B_binding_protein_1
REFERENCE	evm.model.scaffold82_size768308.201	Chlorophyll a-b binding protein, chloroplastic	noEC	C	AT2G34430.1	light-harvesting_chlorophyll-protein_complex_II_subunit_B1
REFERENCE	evm.model.scaffold80_size769704.134	Superoxide dismutase	EC:1.15.1.1	P	AT5G51100.1	Fe_superoxide_dismutase_2
REFERENCE	evm.model.scaffold80_size769704.44	Psbp domain-containing protein 1, chloroplastic	noEC	S	AT4G15510.1	Photosystem_II_reaction_center_PsbP_family_protein
REFERENCE	evm.model.scaffold77_size793173.58	RuBisCO large subunit-binding protein subunit alpha	noEC	O	AT2G28000.1	chaperonin-60alpha
REFERENCE	evm.model.scaffold76_size807220.208	Ferrochelatase	EC:4.99.1.1	H	AT2G30390.1	ferrochelatase_2
REFERENCE	evm.model.scaffold76_size807220.15	psbP domain-containing protein 2, chloroplastic	noEC	S	AT2G28605.1	Photosystem_II_reaction_center_PsbP_family_protein
REFERENCE	evm.model.scaffold75_size815677.34	GDSL esterase/lipase At5g45670-like	noEC	L	AT5G45670.1	GDSL-like_Lipase/Acylhydrolase_superfamily_protein
REFERENCE	evm.model.scaffold74_size818217.153	Dicarboxylate transporter 2.1, chloroplastic	noEC	P	AT5G64290.1	dicarboxylate_transport_2.1
REFERENCE	evm.model.scaffold74_size818217.34	Putative lipase/lipooxygenase, PLAT/LH2 family protein	noEC	S	AT4G39730.1	Lipase/lipooxygenase%2C_PLAT/LH2_family_protein
REFERENCE	evm.model.scaffold74_size818217.3	Protein disulfide isomerase pTAC5, chloroplastic	EC:5.3.4.1	S	AT4G13670.4	plastid_transcriptionally_active_5
REFERENCE	evm.model.scaffold73_size822997.145	Putative plastid-lipid-associated protein 3, chloroplastic	noEC	S	AT2G35490.1	Plastid-lipid_associated_protein_PAP_/_fibrillin_family_protein
REFERENCE	evm.model.scaffold72_size829870.225	Protein CURVATURE THYLAKOID 1C, chloroplastic	noEC	S	AT1G52220.1	CURVATURE_THYLAKOID_protein
REFERENCE	evm.model.scaffold72_size829870.18	Chlorophyll a-b binding protein, chloroplastic	noEC	P	AT4G10340.1	light_harvesting_complex_of_photosystem_II_5
REFERENCE	evm.model.scaffold71_size832853.234	Protein tic 62, chloroplastic	noEC	G	AT3G18890.1	NAD(P)-binding_Rossmann-fold_superfamily_protein
REFERENCE	evm.model.scaffold71_size832853.58	Translocon-associated protein subunit alpha	noEC	U	AT2G16595.1	Translocon-associated_protein_(TRAP)%2C_alpha_subunit
REFERENCE	evm.model.scaffold70_size835982.86	Photosystem ii 10 kDa polypeptide, chloroplastic	noEC	S	AT1G79040.1	photosystem_II_subunit_R
REFERENCE	evm.model.scaffold70_size835982.84	Photosystem ii 10 kDa polypeptide, chloroplastic	noEC	S	AT1G79040.1	photosystem_II_subunit_R
REFERENCE	evm.model.scaffold70_size835982.16	30S ribosomal protein S1, chloroplastic	noEC	J	AT5G30510.1	ribosomal_protein_S1
REFERENCE	evm.model.scaffold69_size841560.167	Photosystem II 22 kDa protein, chloroplastic	noEC	C	AT1G44575.3	Chlorophyll_A-B_binding_family_protein
REFERENCE	evm.model.scaffold68_size843662.242	preprotein translocase subunit SCY1, chloroplastic	noEC	U	AT2G18710.1	SECY_homolog_1
REFERENCE	evm.model.scaffold68_size843662.228	Chlorophyll A-B binding protein	noEC	S	AT4G17600.1	Chlorophyll_A-B_binding_family_protein
REFERENCE	evm.model.scaffold68_size843662.193	Phytoene desaturase	noEC	Q	AT4G14210.3	phytoene_desaturase_3
REFERENCE	evm.model.scaffold68_size843662.186	Ribulose-phosphate 3-epimerase, chloroplastic	EC:5.1.3.1	S	noTAIR	NULL
REFERENCE	evm.model.scaffold68_size843662.166	magnesium protoporphyrin IX methyltransferase, chloroplastic	EC:2.1.1.11	H	AT4G25080.6	magnesium-protoporphyrin_IX_methyltransferase
REFERENCE	evm.model.scaffold68_size843662.77	Chlorophyll a-b binding protein, chloroplastic	noEC	C	AT1G15820.1	light_harvesting_complex_photosystem_II_subunit_6
REFERENCE	evm.model.scaffold68_size843662.41	Chlorophyll a-b binding protein, chloroplastic	noEC	C	AT1G15820.1	light_harvesting_complex_photosystem_II_subunit_6
REFERENCE	evm.model.scaffold67_size845796.177	thioredoxin F-type, chloroplastic-like	EC:1.6.5.4;EC:1.8.1.9;EC:1.8.1.8	O	AT3G02730.1	thioredoxin_F-type_1
REFERENCE	evm.model.scaffold67_size845796.130	Photosystem I reaction centre subunit N	noEC	none	AT1G49975.1	photosystem_I_reaction_center_subunit_N
REFERENCE	evm.model.scaffold67_size845796.70	ATP-dependent Clp protease proteolytic subunit	EC:3.4.21	O	AT1G49970.1	CLP_protease_proteolytic_subunit_1
REFERENCE	evm.model.scaffold67_size845796.53	Ferrochelatase	EC:4.99.1.1	H	AT2G30390.1	ferrochelatase_2
REFERENCE	evm.model.scaffold66_size848830.41	Photosystem II reaction center PsbP family protein	noEC	S	AT1G77090.1	thylakoid_lumenal_protein_(Mog1/PsbP/DUF1795-like_photosystem_II_reaction_center_PsbP_family_protein)
REFERENCE	evm.model.scaffold65_size853472.139	Pentatricopeptide repeat-containing protein, mitochondrial	noEC	S	AT5G42310.1	Pentatricopeptide_repeat_(PPR-like)_superfamily_protein
REFERENCE	evm.model.scaffold65_size853472.93	Carboxyl-terminal-processing peptidase 1, chloroplastic	noEC	M	AT5G46390.2	Peptidase_S41_family_protein
REFERENCE	evm.model.scaffold65_size853472.91	cold-regulated 413 inner membrane protein 1, chloroplastic-like	noEC	S	AT1G29390.2	cold_regulated_314_thylakoid_membrane_2
REFERENCE	evm.model.scaffold64_size856543.195	Non-specific lipid-transfer protein	noEC	T	AT5G59310.1	lipid_transfer_protein_4
REFERENCE	evm.model.scaffold63_size858018.24	Nucleoside diphosphate kinase	EC:2.7.4.6	F	AT5G63310.1	nucleoside_diphosphate_kinase_2
REFERENCE	evm.model.scaffold62_size859589.185	Plastid-lipid-associated protein	noEC	S	AT4G22240.1	Plastid-lipid_associated_protein_PAP_/_fibrillin_family_protein
REFERENCE	evm.model.scaffold62_size859589.154	ATP-dependent Clp protease proteolytic subunit	EC:3.4.21;EC:3.6.1.3;EC:3.6.1.15	O	AT1G02560.1	nuclear_encoded_CLP_protease_5
REFERENCE	evm.model.scaffold62_size859589.53	Chlorophyll a-b binding protein, chloroplastic	noEC	C	AT3G54890.1	chlorophyll_a-b_binding_protein_6
REFERENCE	evm.model.scaffold59_size887255.215	Tetratricopeptide-like helical	noEC	none	AT3G26580.1	Tetratricopeptide_repeat_(TPR)-like_superfamily_protein
REFERENCE	evm.model.scaffold57_size904867.111	magnesium protoporphyrin IX methyltransferase, chloroplastic	EC:2.1.1.11	H	AT4G25080.6	magnesium-protoporphyrin_IX_methyltransferase
REFERENCE	evm.model.scaffold57_size904867.43	Photosystem I P700 chlorophyll a apoprotein A1	noEC	C	ATCG00350.1	Photosystem_I%2C_PsaA/PsaB_protein
REFERENCE	evm.model.scaffold57_size904867.42	Photosystem I P700 chlorophyll a apoprotein A2	noEC	C	ATCG00340.1	Photosystem_I%2C_PsaA/PsaB_protein
REFERENCE	evm.model.scaffold56_size905644.101	Photosystem II 5 kDa protein, chloroplastic	noEC	S	AT3G21055.1	photosystem_II_subunit_T
REFERENCE	evm.model.scaffold56_size905644.81	Chaperone protein DnaJ	noEC	O	AT1G80030.3	Molecular_chaperone_Hsp40/DnaJ_family_protein
REFERENCE	evm.model.scaffold56_size905644.38	30s ribosomal protein s5, chloroplastic	noEC	J	AT2G33800.1	Ribosomal_protein_S5_family_protein
REFERENCE	evm.model.scaffold54_size918619.240	MAR-binding filament-like protein 1-1	noEC	K	AT3G16000.1	MAR_binding_filament-like_protein_1
REFERENCE	evm.model.scaffold52_size936991.21	2-methylene-furan-3-one reductase-like	EC:1.3.1.74;EC:1.6.5.5	C	AT1G23740.1	Oxidoreductase%2C_zinc-binding_dehydrogenase_family_protein
REFERENCE	evm.model.scaffold51_size953629.177	ylmG homolog protein 1-2, chloroplastic-like	noEC	S	AT4G27990.1	YGGT_family_protein
REFERENCE	evm.model.scaffold51_size953629.175	ylmG homolog protein 1-2, chloroplastic-like	noEC	S	AT4G27990.1	YGGT_family_protein
REFERENCE	evm.model.scaffold51_size953629.173	putative quinone-oxidoreductase homolog, chloroplastic	EC:1.6.5.5	C	AT4G13010.1	Oxidoreductase%2C_zinc-binding_dehydrogenase_family_protein
REFERENCE	evm.model.scaffold51_size953629.36	PGR5-like protein 1A, chloroplastic	noEC	S	AT4G22890.4	PGR5-LIKE_A
REFERENCE	evm.model.scaffold50_size963328.218	Sedoheptulose-1,7-bisphosphatase, chloroplastic	EC:3.1.3.37;EC:3.1.3.23;EC:3.1.3.11	G	AT3G55800.1	sedoheptulose-bisphosphatase
REFERENCE	evm.model.scaffold50_size963328.162	Cytochrome b5	noEC	C	AT5G53560.1	cytochrome_B5_isoform_E
REFERENCE	evm.model.scaffold50_size963328.159	Cytochrome b5	noEC	C	AT5G53560.1	cytochrome_B5_isoform_E
REFERENCE	evm.model.scaffold50_size963328.146	Uncharacterized protein	noEC	none	AT5G16660.1	Low-density_receptor-like_protein
REFERENCE	evm.model.scaffold48_size992202.57	Photosystem II reaction center PsbP family protein	noEC	S	AT3G05410.2	Photosystem_II_reaction_center_PsbP_family_protein
REFERENCE	evm.model.scaffold48_size992202.37	Signal recognition particle 43 kDa protein, chloroplastic	noEC	S	AT2G47450.1	chloroplast_signal_recognition_particle_component_(CAO)
REFERENCE	evm.model.scaffold48_size992202.11	Plastocyanin	noEC	C	AT1G76100.2	plastocyanin_1
REFERENCE	evm.model.scaffold47_size1002735.88	Lipoxygenase	EC:1.13.11;EC:1.13.11.12	E	AT1G17420.1	lipoxygenase_3
REFERENCE	evm.model.scaffold46_size1006163.62	Enoyl-ACP Reductase	EC:2.3.1.85;EC:1.3.1.9	Q	AT2G05990.2	NAD(P)-binding_Rossmann-fold_superfamily_protein
REFERENCE	evm.model.scaffold46_size1006163.61	Enoyl-ACP Reductase	EC:1.3.1.9	Q	noTAIR	NULL
REFERENCE	evm.model.scaffold46_size1006163.47	trihelix transcription factor ASR3-like	noEC	S	AT2G35640.1	Homeodomain-like_superfamily_protein
REFERENCE	evm.model.scaffold46_size1006163.43	[Ribulose-bisphosphate carboxylase]-lysine N-methyltransferase	EC:2.1.1.127	S	AT4G20130.1	plastid_transcriptionally_active_14
REFERENCE	evm.model.scaffold45_size1012159.210	ALBINO3-like protein 1, chloroplastic	noEC	OU	noTAIR	NULL
REFERENCE	evm.model.scaffold45_size1012159.31	Photosystem II D2 protein	noEC	C	ATCG00270.1	photosystem_II_reaction_center_protein_D
REFERENCE	evm.model.scaffold45_size1012159.30	Photosystem II CP43 reaction center protein	noEC	C	ATCG00280.1	photosystem_II_reaction_center_protein_C
REFERENCE	evm.model.scaffold45_size1012159.29	Photosystem I P700 chlorophyll a apoprotein A2	noEC	C	ATCG00340.1	Photosystem_I%2C_PsaA/PsaB_protein
REFERENCE	evm.model.scaffold45_size1012159.12	20 kDa chaperonin, chloroplastic-like	noEC	O	AT5G20720.4	chaperonin_20
REFERENCE	evm.model.scaffold44_size1017685.201	Rhodanese-like domain-containing protein 10	noEC	S	AT3G08920.1	Rhodanese/Cell_cycle_control_phosphatase_superfamily_protein
REFERENCE	evm.model.scaffold44_size1017685.94	psbP domain-containing protein 4, chloroplastic	noEC	S	AT1G77090.1	thylakoid_lumenal_protein_(Mog1/PsbP/DUF1795-like_photosystem_II_reaction_center_PsbP_family_protein)
REFERENCE	evm.model.scaffold44_size1017685.25	33 kDa ribonucleoprotein, chloroplastic	noEC	A	AT3G52380.1	chloroplast_RNA-binding_protein_33
REFERENCE	evm.model.scaffold43_size1025288.213	nucleoid-associated protein At4g30620, chloroplastic-like	noEC	L	AT4G30620.1	Putative_BCR%2C_YbaB_family_COG0718
REFERENCE	evm.model.scaffold43_size1025288.209	Chlorophyll a-b binding protein, chloroplastic	noEC	C	AT1G29920.1	chlorophyll_A/B-binding_protein_2
REFERENCE	evm.model.scaffold43_size1025288.206	Chlorophyll a-b binding protein, chloroplastic	noEC	C	AT2G34430.1	light-harvesting_chlorophyll-protein_complex_II_subunit_B1
REFERENCE	evm.model.scaffold43_size1025288.75	Mitochodrial transcription termination factor-related protein	noEC	K	AT4G38160.4	Mitochondrial_transcription_termination_factor_family_protein
REFERENCE	evm.model.scaffold41_size1047198.214	Photosystem II core complex proteins psbY, chloroplastic	noEC	S	AT1G67740.1	photosystem_II_BY
REFERENCE	evm.model.scaffold41_size1047198.75	NAD(P)-binding domain containing protein	noEC	G	AT2G34460.1	NAD(P)-binding_Rossmann-fold_superfamily_protein
REFERENCE	evm.model.scaffold41_size1047198.45	putative quinone-oxidoreductase homolog, chloroplastic	EC:1.6.5.5	C	AT4G13010.1	Oxidoreductase%2C_zinc-binding_dehydrogenase_family_protein
REFERENCE	evm.model.scaffold39_size1053542.235	20 kDa chaperonin, chloroplastic	noEC	O	AT5G20720.4	chaperonin_20
REFERENCE	evm.model.scaffold39_size1053542.205	Uncharacterized protein	noEC	none	AT5G16660.1	Low-density_receptor-like_protein
REFERENCE	evm.model.scaffold38_size1053794.198	Rho GTPase activator	noEC	T	AT5G19390.2	Rho_GTPase_activation_protein_(RhoGAP)_with_PH_domain-containing_protein
REFERENCE	evm.model.scaffold37_size1057303.258	DUF3082 domain-containing protein	noEC	S	AT3G15110.1	transmembrane_protein
REFERENCE	evm.model.scaffold37_size1057303.148	Porphobilinogen deaminase	noEC	none	AT2G36145.1	hypothetical_protein
REFERENCE	evm.model.scaffold37_size1057303.70	Photosystem II protein D1	EC:1.10.3	C	ATCG00020.1	photosystem_II_reaction_center_protein_A
REFERENCE	evm.model.scaffold37_size1057303.66	Photosystem II CP47 reaction center protein	noEC	C	ATCG00680.1	photosystem_II_reaction_center_protein_B
REFERENCE	evm.model.scaffold37_size1057303.61	Cytochrome f	noEC	C	ATCG00540.1	photosynthetic_electron_transfer_A
REFERENCE	evm.model.scaffold37_size1057303.59	ATP synthase subunit beta, chloroplastic	EC:7.1.1.2;EC:1.6.99.5;EC:1.6.99.3	C	ATCG00480.1	ATP_synthase_subunit_beta
REFERENCE	evm.model.scaffold37_size1057303.58	Photosystem I P700 chlorophyll a apoprotein A1	noEC	C	ATCG00350.1	Photosystem_I%2C_PsaA/PsaB_protein
REFERENCE	evm.model.scaffold37_size1057303.57	Photosystem I P700 apoprotein A2 (Fragment)	noEC	C	ATCG00340.1	Photosystem_I%2C_PsaA/PsaB_protein
REFERENCE	evm.model.scaffold37_size1057303.56	Cytochrome f	noEC	C	ATCG00540.1	photosynthetic_electron_transfer_A
REFERENCE	evm.model.scaffold37_size1057303.55	Photosystem II CP43 reaction center protein	noEC	C	ATCG00280.1	photosystem_II_reaction_center_protein_C
REFERENCE	evm.model.scaffold37_size1057303.54	Photosystem II D2 protein	noEC	C	ATCG00270.1	photosystem_II_reaction_center_protein_D
REFERENCE	evm.model.scaffold35_size1080921.286	Rhodanese-like domain-containing protein 9, chloroplastic	noEC	V	AT2G42220.1	Rhodanese/Cell_cycle_control_phosphatase_superfamily_protein
REFERENCE	evm.model.scaffold35_size1080921.268	Non-specific lipid-transfer protein	noEC	W	AT2G38530.1	lipid_transfer_protein_2
REFERENCE	evm.model.scaffold35_size1080921.20	Photosystem I reaction center subunit III, chloroplastic	noEC	S	AT1G31330.1	photosystem_I_subunit_F
REFERENCE	evm.model.scaffold34_size1082081.217	ATP synthase gamma chain, chloroplastic	noEC	C	AT4G04640.1	ATPase%2C_F1_complex%2C_gamma_subunit_protein
REFERENCE	evm.model.scaffold34_size1082081.98	28 kDa ribonucleoprotein, chloroplastic-like	noEC	A	AT4G24770.2	31-kDa_RNA_binding_protein
REFERENCE	evm.model.scaffold33_size1110170.315	Stromal 70 kDa heat shock-related protein, chloroplastic	EC:1.3.1.74;EC:3.6.1.3;EC:3.6.1.15	O	AT5G49910.1	chloroplast_heat_shock_protein_70-2
REFERENCE	evm.model.scaffold33_size1110170.269	serine/threonine-protein kinase STN8, chloroplastic	EC:2.7.11	T	AT5G01920.2	Protein_kinase_superfamily_protein
REFERENCE	evm.model.scaffold33_size1110170.35	Lactoylglutathione lyase	EC:4.4.1.5	G	AT1G67280.1	Glyoxalase/Bleomycin_resistance_protein/Dioxygenase_superfamily_protein
REFERENCE	evm.model.scaffold32_size1119335.83	Protein kinase	EC:7.2.2.2	I	AT3G07700.4	Protein_kinase_superfamily_protein
REFERENCE	evm.model.scaffold32_size1119335.42	Polyphenol oxidase	EC:1.10.3;EC:1.10.3.1	Q	noTAIR	NULL
REFERENCE	evm.model.scaffold31_size1122664.299	Protein PLASTID TRANSCRIPTIONALLY ACTIVE 16, chloroplastic	noEC	G	AT3G46780.1	plastid_transcriptionally_active_16
REFERENCE	evm.model.scaffold31_size1122664.296	high-light-induced protein, chloroplastic	noEC	S	AT5G02120.1	one_helix_protein
REFERENCE	evm.model.scaffold31_size1122664.209	Chlorophyll a-b binding protein, chloroplastic	noEC	C	AT4G10340.1	light_harvesting_complex_of_photosystem_II_5
REFERENCE	evm.model.scaffold31_size1122664.40	Protein CURVATURE THYLAKOID 1D, chloroplastic (Fragment)	noEC	S	AT4G38100.2	CURVATURE_THYLAKOID_1D-like_protein
REFERENCE	evm.model.scaffold29_size1161289.289	Mar-binding filament-like protein 1-1	noEC	K	AT3G16000.1	MAR_binding_filament-like_protein_1
REFERENCE	evm.model.scaffold29_size1161289.280	ATP-dependent Clp protease proteolytic subunit	EC:3.4.21	O	AT5G23140.1	nuclear-encoded_CLP_protease_P7
REFERENCE	evm.model.scaffold29_size1161289.113	Elongation factor Tu	EC:2.7.11;EC:3.6.1.15	J	AT4G20360.2	RAB_GTPase_homolog_E1B
REFERENCE	evm.model.scaffold29_size1161289.84	Peptidyl-prolyl cis-trans isomerase	EC:5.2.1.8	O	AT5G35100.3	Cyclophilin-like_peptidyl-prolyl_cis-trans_isomerase_family_protein
REFERENCE	evm.model.scaffold29_size1161289.68	psbP domain-containing protein 6, chloroplastic	noEC	S	AT3G56650.1	thylakoid_lumenal_protein_(Mog1/PsbP/DUF1795-like_photosystem_II_reaction_center_PsbP_family_protein)
REFERENCE	evm.model.scaffold28_size1211183.326	protein TIC 40, chloroplastic	noEC	OT	AT5G16620.1	hydroxyproline-rich_glycoprotein_family_protein
REFERENCE	evm.model.scaffold28_size1211183.325	Ribulose bisphosphate carboxylase/oxygenase activase, chloroplastic-like	noEC	O	AT1G73110.1	P-loop_containing_nucleoside_triphosphate_hydrolases_superfamily_protein
REFERENCE	evm.model.scaffold28_size1211183.312	psbP domain-containing protein 3, chloroplastic	noEC	S	AT1G76450.1	Photosystem_II_reaction_center_PsbP_family_protein
REFERENCE	evm.model.scaffold28_size1211183.271	Chlorophyll a-b binding protein, chloroplastic	noEC	S	noTAIR	NULL
REFERENCE	evm.model.scaffold27_size1214473.234	Monofunctional biosynthetic peptidoglycan transglycosylase	noEC	none	AT2G17972.1	transmembrane_protein
REFERENCE	evm.model.scaffold27_size1214473.135	Chlorophyll a-b binding protein, chloroplastic	noEC	P	AT3G08940.2	light_harvesting_complex_photosystem_II
REFERENCE	evm.model.scaffold25_size1264610.8	ATP synthase subunit d, mitochondrial	noEC	C	AT3G52300.2	ATP_synthase_D_chain
REFERENCE	evm.model.scaffold24_size1299124.160	Ribulose bisphosphate carboxylase/oxygenase activase 1, chloroplastic	noEC	O	AT2G39730.1	rubisco_activase
REFERENCE	evm.model.scaffold24_size1299124.26	Enoyl-[acyl-carrier-protein] reductase [NADH], chloroplastic	EC:2.3.1.85;EC:1.3.1.9	Q	AT2G05990.2	NAD(P)-binding_Rossmann-fold_superfamily_protein
REFERENCE	evm.model.scaffold23_size1301348.89	Chlorophyllide a oxygenase, chloroplastic	EC:1.13.12;EC:1.14.13.122	P	AT1G44446.1	Pheophorbide_a_oxygenase_family_protein_with_Rieske_2Fe-2S_domain-containing_protein
REFERENCE	evm.model.scaffold23_size1301348.88	Chlorophyllide a oxygenase, chloroplastic	EC:1.13.12;EC:1.14.13.122	P	AT1G44446.2	Pheophorbide_a_oxygenase_family_protein_with_Rieske_2Fe-2S_domain-containing_protein
REFERENCE	evm.model.scaffold22_size1326342.109	Ribulose bisphosphate carboxylase/oxygenase activase 1, chloroplastic	EC:3.6.1.3;EC:3.6.1.15	O	AT2G39730.2	rubisco_activase
REFERENCE	evm.model.scaffold21_size1333958.347	Cytochrome b6-f complex subunit 7	noEC	K	AT2G26500.2	cytochrome_b6f_complex_subunit_(petM)
REFERENCE	evm.model.scaffold21_size1333958.318	Triosephosphate isomerase, chloroplastic	EC:5.3.1.1	G	AT2G21170.3	triosephosphate_isomerase
REFERENCE	evm.model.scaffold21_size1333958.305	30S ribosomal protein 3, chloroplastic	noEC	J	AT5G15760.1	Ribosomal_protein_PSRP-3/Ycf65
REFERENCE	evm.model.scaffold21_size1333958.215	Protein kinase	EC:7.2.2.2	I	AT3G07700.4	Protein_kinase_superfamily_protein
REFERENCE	evm.model.scaffold21_size1333958.19	protein CURVATURE THYLAKOID 1B, chloroplastic	noEC	S	AT2G46820.2	photosystem_I_P_subunit
REFERENCE	evm.model.scaffold20_size1366081.268	ATP-dependent zinc metalloprotease FTSH 11, chloroplastic/mitochondrial-like	EC:3.4.24;EC:3.6.1.3;EC:3.6.1.15	O	AT5G53170.1	FTSH_protease_11
REFERENCE	evm.model.scaffold20_size1366081.2	36.4 kDa proline-rich protein	noEC	S	AT2G10940.2	Bifunctional_inhibitor/lipid-transfer_protein/seed_storage_2S_albumin_superfamily_protein
REFERENCE	evm.model.scaffold19_size1367837.63	Histone H4	noEC	B	AT5G59970.2	Histone_superfamily_protein
REFERENCE	evm.model.scaffold18_size1404391.103	Enoyl-ACP Reductase	EC:2.3.1.85;EC:1.3.1.9	Q	AT2G05990.2	NAD(P)-binding_Rossmann-fold_superfamily_protein
REFERENCE	evm.model.scaffold18_size1404391.93	Alpha carbonic anhydrase	EC:4.2.1.1	P	AT4G20990.1	alpha_carbonic_anhydrase_4
REFERENCE	evm.model.scaffold17_size1411551.290	serine/threonine-protein kinase STN7, chloroplastic	EC:2.7.11	T	AT1G68830.1	Serine/Threonine_kinase_domain_protein
REFERENCE	evm.model.scaffold17_size1411551.81	K(+) efflux antiporter 3, chloroplastic	EC:1.8.4.12	P	AT4G04850.2	K+_efflux_antiporter_3
REFERENCE	evm.model.scaffold16_size1429268.238	ATP synthase epsilon chain, chloroplastic	noEC	S	AT3G19480.1	D-3-phosphoglycerate_dehydrogenase
REFERENCE	evm.model.scaffold16_size1429268.92	Histone H4	noEC	B	AT5G59970.2	Histone_superfamily_protein
REFERENCE	evm.model.scaffold15_size1429888.418	Rhodanese-like domain-containing protein 14, chloroplastic	noEC	L	AT4G27700.1	Rhodanese/Cell_cycle_control_phosphatase_superfamily_protein
REFERENCE	evm.model.scaffold15_size1429888.302	Superoxide dismutase [fe] 2, chloroplastic	EC:1.15.1.1	P	AT5G51100.1	Fe_superoxide_dismutase_2
REFERENCE	evm.model.scaffold15_size1429888.264	Photosystem II subunit Q-2	noEC	S	AT4G05180.2	photosystem_II_subunit_Q-2
REFERENCE	evm.model.scaffold15_size1429888.196	Annexin	EC:3.6.1.3;EC:3.6.1.15;EC:1.11.1.7	U	AT1G35720.1	annexin_1
REFERENCE	evm.model.scaffold15_size1429888.65	Ribulose bisphosphate carboxylase/oxygenase activase 1, chloroplastic	EC:3.6.1.3;EC:3.6.1.15	O	AT2G39730.3	rubisco_activase
REFERENCE	evm.model.scaffold15_size1429888.60	Ribulose bisphosphate carboxylase/oxygenase activase 2, chloroplastic	noEC	O	AT2G39730.3	rubisco_activase
REFERENCE	evm.model.scaffold15_size1429888.29	K(+) efflux antiporter 3, chloroplastic	EC:1.8.4.12	P	AT4G04850.2	K+_efflux_antiporter_3
REFERENCE	evm.model.scaffold14_size1455245.276	ATP synthase subunit d, mitochondrial	noEC	C	AT3G52300.1	ATP_synthase_D_chain
REFERENCE	evm.model.scaffold14_size1455245.275	ATP synthase subunit d, mitochondrial	noEC	C	AT3G52300.1	ATP_synthase_D_chain
REFERENCE	evm.model.scaffold14_size1455245.169	ALBINO3-like protein 1, chloroplastic	noEC	OU	noTAIR	NULL
REFERENCE	evm.model.scaffold12_size1484567.163	Cytochrome c oxidase subunit 6b-1	noEC	C	AT1G22450.1	cytochrome_C_oxidase_6B
REFERENCE	evm.model.scaffold10_size1516488.313	Putative ribose-5-phosphate isomerase 3, chloroplastic	EC:5.3.1.6	G	AT3G04790.1	Ribose_5-phosphate_isomerase%2C_type_A_protein
REFERENCE	evm.model.scaffold10_size1516488.263	50S ribosomal protein L27, chloroplastic	noEC	J	AT5G40950.1	ribosomal_protein_large_subunit_27
REFERENCE	evm.model.scaffold8_size1575602.306	Mg-protoporphyrin IX chelatase	EC:6.6.1.1	Z	AT1G08520.1	ALBINA_1
REFERENCE	evm.model.scaffold8_size1575602.3	Adenylate kinase 5, chloroplastic	EC:2.7.4.4;EC:2.7.4.3	F	AT5G35170.2	adenylate_kinase_family_protein
REFERENCE	evm.model.scaffold7_size1580086.369	ATP-dependent Clp protease proteolytic subunit	EC:3.4.21;EC:3.6.1.3;EC:3.6.1.15	O	AT1G02560.1	nuclear_encoded_CLP_protease_5
REFERENCE	evm.model.scaffold7_size1580086.334	Fructose-bisphosphate aldolase	EC:4.1.2.13	G	AT2G01140.1	Aldolase_superfamily_protein
REFERENCE	evm.model.scaffold7_size1580086.38	UPF0187 protein At3g61320, chloroplastic-like	noEC	S	AT3G61320.1	Bestrophin-like_protein
REFERENCE	evm.model.scaffold5_size1651677.317	ACT domain-containing protein DS12, chloroplastic	noEC	S	AT1G16880.1	uridylyltransferase-like_protein
REFERENCE	evm.model.scaffold5_size1651677.301	Ribosome recycling factor	noEC	J	AT3G63190.1	ribosome_recycling_factor%2C_chloroplast_precursor
REFERENCE	evm.model.scaffold5_size1651677.300	rho GTPase-activating protein 7-like	noEC	T	AT5G19390.2	Rho_GTPase_activation_protein_(RhoGAP)_with_PH_domain-containing_protein
REFERENCE	evm.model.scaffold4_size1665106.332	Cleavage and polyadenylation specificity factor subunit like	noEC	S	AT5G08050.1	wiskott-aldrich_syndrome_family_protein%2C_putative_(DUF1118)
REFERENCE	evm.model.scaffold4_size1665106.106	Cytochrome b5	EC:1.6.2.2	C	AT5G53560.1	cytochrome_B5_isoform_E
REFERENCE	evm.model.scaffold4_size1665106.42	Thylakoid lumenal 15 kDa protein 1, chloroplastic	noEC	S	AT2G44920.2	Tetratricopeptide_repeat_(TPR)-like_superfamily_protein
REFERENCE	evm.model.scaffold4_size1665106.18	Allene oxide synthase	EC:4.2.1.92	Q	AT5G42650.1	allene_oxide_synthase
REFERENCE	evm.model.scaffold2_size1816428.449	Carbonic anhydrase	EC:4.2.1.1	P	AT3G01500.3	carbonic_anhydrase_1
REFERENCE	evm.model.scaffold2_size1816428.436	protease Do-like 8, chloroplastic	EC:3.4.21;EC:1.3.1.74	O	AT5G39830.1	Trypsin_family_protein_with_PDZ_domain-containing_protein
REFERENCE	evm.model.scaffold2_size1816428.181	translocon-associated protein subunit alpha-like	noEC	U	AT2G16595.1	Translocon-associated_protein_(TRAP)%2C_alpha_subunit
REFERENCE	evm.model.scaffold2_size1816428.45	Photosystem I subunit O	noEC	S	AT1G08380.1	photosystem_I_subunit_O
REFERENCE	evm.model.scaffold1_size1862935.377	Cytochrome b6-f complex subunit 7	noEC	S	AT2G26500.2	cytochrome_b6f_complex_subunit_(petM)
[OVER]	GO:0009507	chloroplast	CELLULAR_COMPONENT	9.068480610292137E-9	4.207027087248929E-10	226	2783	1175	23567
REFERENCE	evm.model.scaffold1803_size1184.1	D-amino-acid transaminase, chloroplastic-like	EC:4.1.3.38;EC:2.6.1.42	E	AT5G57850.2	D-aminoacid_aminotransferase-like_PLP-dependent_enzymes_superfamily_protein
REFERENCE	evm.model.scaffold1737_size1665.1	probable GTP diphosphokinase RSH2, chloroplastic	EC:2.7.6.5;EC:3.1.7.2	T	AT1G54130.1	RELA/SPOT_homolog_3
REFERENCE	evm.model.scaffold1709_size1949.2	BnaC09g29260D protein	noEC	none	noTAIR	NULL
REFERENCE	evm.model.scaffold1705_size1996.1	protein DJ-1 homolog C	noEC	V	AT4G34020.1	Class_I_glutamine_amidotransferase-like_superfamily_protein
REFERENCE	evm.model.scaffold1635_size3358.1	glucose and ribitol dehydrogenase homolog 1-like	EC:2.3.1.85;EC:1.1.1.100;EC:1.1.1.2	Q	AT1G54870.2	NAD(P)-binding_Rossmann-fold_superfamily_protein
REFERENCE	evm.model.scaffold1603_size4267.2	Anthranilate synthase component II	EC:4.1.1.48;EC:5.3.1.24	E	AT5G48220.3	Aldolase-type_TIM_barrel_family_protein
REFERENCE	evm.model.scaffold1602_size4270.1	Thiamine thiazole synthase, chloroplastic	noEC	H	AT5G54770.1	thiazole_biosynthetic_enzyme%2C_chloroplast_(ARA6)_(THI1)_(THI4)
REFERENCE	evm.model.scaffold1593_size4461.1	Ferredoxin--nitrite reductase, chloroplastic	EC:1.7.2.1;EC:1.7.7.1	P	AT2G15620.1	nitrite_reductase_1
REFERENCE	evm.model.scaffold1586_size4565.2	Ribonuclease J-like (Fragment)	noEC	AK	AT5G63420.1	RNA-metabolising_metallo-beta-lactamase_family_protein
REFERENCE	evm.model.scaffold1573_size5057.1	Nuclear pore complex protein NUP155	noEC	UY	AT1G14850.1	nucleoporin_155
REFERENCE	evm.model.scaffold1569_size5082.1	Nuclear pore complex protein NUP155	noEC	UY	AT1G14850.1	nucleoporin_155
REFERENCE	evm.model.scaffold1558_size5242.1	probable ribosome-binding factor A, chloroplastic	noEC	C	AT4G34730.3	ribosome-binding_factor_A_family_protein
REFERENCE	evm.model.scaffold1541_size5404.1	peroxisomal fatty acid beta-oxidation multifunctional protein AIM1-like	EC:1.1.1.35;EC:5.3.3.8;EC:4.2.1.17;EC:5.1.2.3	I	AT4G29010.1	Enoyl-CoA_hydratase/isomerase_family
REFERENCE	evm.model.scaffold1528_size5622.2	Phosphoglycerate kinase	EC:2.7.2.3	G	AT1G56190.1	Phosphoglycerate_kinase_family_protein
REFERENCE	evm.model.scaffold1528_size5622.1	Sulfurtransferase	EC:2.8.1.2;EC:2.8.1.1	H	AT1G79230.2	mercaptopyruvate_sulfurtransferase_1
REFERENCE	evm.model.scaffold1524_size5672.1	Chlorophyll a-b binding protein, chloroplastic	noEC	C	AT5G01530.1	light_harvesting_complex_photosystem_II
REFERENCE	evm.model.scaffold1508_size5810.1	Glutathione peroxidase	EC:1.11.1.9;EC:1.11.1.7	O	AT4G11600.1	glutathione_peroxidase_6
REFERENCE	evm.model.scaffold1503_size5883.1	Acyl-[acyl-carrier-protein] hydrolase	EC:2.3.1.85;EC:3.1.2.14	I	AT4G13050.1	Acyl-ACP_thioesterase
REFERENCE	evm.model.scaffold1496_size5945.2	GDP-fucose protein O-fucosyltransferase (Fragment)	noEC	G	AT5G35570.1	O-fucosyltransferase_family_protein
REFERENCE	evm.model.scaffold1485_size6042.1	Aquaporin PIP2-1	noEC	P	AT2G37170.2	plasma_membrane_intrinsic_protein_2
REFERENCE	evm.model.scaffold1476_size6158.2	GTP pyrophosphokinase	noEC	S	noTAIR	NULL
REFERENCE	evm.model.scaffold1467_size6224.2	Putative plastid-lipid-associated protein 7, chloroplastic	noEC	S	AT5G09820.2	Plastid-lipid_associated_protein_PAP_/_fibrillin_family_protein
REFERENCE	evm.model.scaffold1453_size6555.3	Alpha-amylase	EC:3.2.1.1	G	AT1G69830.1	alpha-amylase-like_3
REFERENCE	evm.model.scaffold1449_size6619.2	DEAD-box ATP-dependent RNA helicase 3, chloroplastic	EC:3.6.1.3;EC:3.6.4.13;EC:3.6.1.15	A	AT5G26742.1	DEAD_box_RNA_helicase_(RH3)
REFERENCE	evm.model.scaffold1449_size6619.1	DEAD-box ATP-dependent RNA helicase 3, chloroplastic	EC:3.6.1.3;EC:3.6.4.13;EC:3.6.1.15	A	AT5G26742.3	DEAD_box_RNA_helicase_(RH3)
REFERENCE	evm.model.scaffold1447_size6641.1	protein RETICULATA-RELATED 1, chloroplastic-like	noEC	S	AT5G24690.1	plant/protein%2C_putative_(DUF3411)
REFERENCE	evm.model.scaffold1446_size6647.3	Monofunctional biosynthetic peptidoglycan transglycosylase	noEC	none	AT2G17972.1	transmembrane_protein
REFERENCE	evm.model.scaffold1445_size6657.1	protein RETICULATA-RELATED 1, chloroplastic-like	noEC	S	AT5G24690.1	plant/protein%2C_putative_(DUF3411)
REFERENCE	evm.model.scaffold1440_size6702.1	Protein CURVATURE THYLAKOID 1B, chloroplastic	noEC	S	AT2G46820.2	photosystem_I_P_subunit
REFERENCE	evm.model.scaffold1406_size7174.1	Phosphatidylinositol transfer protein SEC14	noEC	I	AT4G09160.3	SEC14_cytosolic_factor_family_protein_/_phosphoglyceride_transfer_family_protein
REFERENCE	evm.model.scaffold1365_size8052.1	Protein translocase subunit SecA	EC:3.6.1.3;EC:7.4.2.3;EC:7.4.2.4;EC:7.4.2.5;EC:3.6.1.15	U	AT1G21650.2	Preprotein_translocase_SecA_family_protein
REFERENCE	evm.model.scaffold1357_size8139.1	RNA recognition motif domain protein	noEC	A	AT2G37220.1	RNA-binding_(RRM/RBD/RNP_motifs)_family_protein
REFERENCE	evm.model.scaffold1350_size8229.3	GrpE protein homolog	noEC	O	AT5G17710.3	Co-chaperone_GrpE_family_protein
REFERENCE	evm.model.scaffold1337_size8463.1	WAT1-related protein, chloroplastic	noEC	EG	AT3G02690.1	nodulin_MtN21_/EamA-like_transporter_family_protein
REFERENCE	evm.model.scaffold1332_size8611.4	probable mitochondrial intermediate peptidase, mitochondrial isoform X2	EC:3.4.11;EC:3.4.24	O	AT5G51540.1	Zincin-like_metalloproteases_family_protein
REFERENCE	evm.model.scaffold1329_size8672.1	glycine--tRNA ligase, chloroplastic/mitochondrial 2 isoform X3	EC:6.1.1.14;EC:6.1.1.19	J	AT3G48110.1	glycine-tRNA_ligase
REFERENCE	evm.model.scaffold1328_size8685.1	MOS4-associated complex 3A	noEC	S	AT2G33340.2	MOS4-associated_complex_3B
REFERENCE	evm.model.scaffold1321_size8904.2	3-isopropylmalate dehydrogenase	EC:1.1.1.85	E	AT1G80560.1	isopropylmalate_dehydrogenase_2
REFERENCE	evm.model.scaffold1318_size8943.3	Serine protease SPPA, chloroplastic	EC:3.4.21	OU	AT1G73990.1	signal_peptide_peptidase
REFERENCE	evm.model.scaffold1318_size8943.2	enolase 1, chloroplastic-like	EC:4.2.1.11	G	AT1G74030.1	enolase_1
REFERENCE	evm.model.scaffold1318_size8943.1	protein CHAPERONE-LIKE PROTEIN OF POR1, chloroplastic	noEC	S	AT5G23040.2	cell_growth_defect_factor-like_protein_(DUF3353)
REFERENCE	evm.model.scaffold1307_size9241.2	Peptide deformylase	EC:3.5.1.88	J	AT1G15390.1	peptide_deformylase_1A
REFERENCE	evm.model.scaffold1307_size9241.1	Pre-mrna-processing-splicing factor 8a	noEC	A	AT1G80070.1	Pre-mRNA-processing-splicing_factor
REFERENCE	evm.model.scaffold1300_size9405.2	photosystem I reaction center subunit V, chloroplastic-like	noEC	S	AT1G55670.1	photosystem_I_subunit_G
REFERENCE	evm.model.scaffold1294_size9512.1	Glutamine synthetase	EC:6.3.1.2	E	AT5G35630.3	glutamine_synthetase_2
REFERENCE	evm.model.scaffold1292_size9548.1	protein EMBRYO SAC DEVELOPMENT ARREST 3, chloroplastic	EC:1.8.1.8	S	AT2G34860.2	DnaJ/Hsp40_cysteine-rich_domain_superfamily_protein
REFERENCE	evm.model.scaffold1290_size9572.1	CSC1-like protein ERD4	noEC	S	AT1G30360.1	Early-responsive_to_dehydration_stress_protein_(ERD4)
REFERENCE	evm.model.scaffold1283_size9704.4	Pentatricopeptide repeat-containing protein mitochondrial	noEC	S	noTAIR	NULL
REFERENCE	evm.model.scaffold1279_size9773.1	MOS4-associated complex 3A	noEC	S	AT2G33340.2	MOS4-associated_complex_3B
REFERENCE	evm.model.scaffold1277_size9836.1	Malic enzyme	EC:1.1.1.38;EC:1.1.1.39;EC:1.1.1.40	C	AT5G25880.1	NADP-malic_enzyme_3
REFERENCE	evm.model.scaffold1274_size9886.2	GrpE protein homolog	noEC	O	AT5G17710.3	Co-chaperone_GrpE_family_protein
REFERENCE	evm.model.scaffold1270_size10000.3	ATP-dependent 6-phosphofructokinase	EC:2.7.1.11	G	AT2G22480.1	phosphofructokinase_5
REFERENCE	evm.model.scaffold1259_size10481.2	FHA domain-containing protein DDL	noEC	T	AT3G20550.1	SMAD/FHA_domain-containing_protein
REFERENCE	evm.model.scaffold1259_size10481.1	Smad nuclear-interacting protein 1	noEC	T	AT3G20550.1	SMAD/FHA_domain-containing_protein
REFERENCE	evm.model.scaffold1256_size10580.1	50S ribosomal protein L4, chloroplastic	noEC	J	AT1G07320.2	ribosomal_protein_L4
REFERENCE	evm.model.scaffold1252_size10664.1	Diaminopimelate epimerase	EC:5.1.1.7;EC:5.1.1.10	E	AT3G53580.1	diaminopimelate_epimerase_family_protein
REFERENCE	evm.model.scaffold1250_size10749.3	Bifunctional phosphatase IMPL2, chloroplastic	EC:3.1.3.25;EC:3.1.3.15	G	AT4G39120.1	inositol_monophosphatase_family_protein
REFERENCE	evm.model.scaffold1241_size10950.1	Ribonuclease iii domain-containing protein rnc1, chloroplastic	EC:3.1.30;EC:3.1.26;EC:3.1.26.3	S	AT4G37510.1	Ribonuclease_III_family_protein
REFERENCE	evm.model.scaffold1238_size10990.5	DAR GTPase 3, chloroplastic-like	EC:3.6.1.15	S	AT4G02790.1	GTP-binding_family_protein
REFERENCE	evm.model.scaffold1234_size11197.1	Acyl-[acyl-carrier-protein] desaturase	EC:1.14.19.2;EC:1.14.19	C	AT2G43710.2	Plant_stearoyl-acyl-carrier-protein_desaturase_family_protein
REFERENCE	evm.model.scaffold1233_size11201.1	Acyl-[acyl-carrier-protein] desaturase	EC:1.14.19.2;EC:1.14.19	C	AT2G43710.2	Plant_stearoyl-acyl-carrier-protein_desaturase_family_protein
REFERENCE	evm.model.scaffold1222_size11527.4	Elongation factor Ts, mitochondrial	noEC	J	AT4G29060.2	elongation_factor_Ts_family_protein
REFERENCE	evm.model.scaffold1217_size11707.2	Psbp-like protein 1, chloroplastic	noEC	O	AT3G55330.1	PsbP-like_protein_1
REFERENCE	evm.model.scaffold1216_size11741.1	reactive oxygen species modulator 1	EC:2.8.1.8	S	AT3G07910.1	reactive_oxygen_species_modulator-like_protein
REFERENCE	evm.model.scaffold1214_size11807.7	Glutaredoxin-C5, chloroplastic	EC:1.8.1.7;EC:1.8.1.9	O	AT2G20270.1	Thioredoxin_superfamily_protein
REFERENCE	evm.model.scaffold1214_size11807.6	photosystem I reaction center subunit IV A, chloroplastic	noEC	S	AT2G20260.1	photosystem_I_subunit_E-2
REFERENCE	evm.model.scaffold1205_size12494.3	inactive LRR receptor-like serine/threonine-protein kinase BIR2	EC:2.7.11	T	AT3G28450.1	Leucine-rich_repeat_protein_kinase_family_protein
REFERENCE	evm.model.scaffold1202_size12764.3	Heat shock protein DnaJ, cysteine-rich domain containing protein	noEC	none	AT1G22630.1	SSUH2-like_protein
REFERENCE	evm.model.scaffold1193_size13189.1	Putative ovule protein	noEC	S	AT4G18425.1	transmembrane_protein%2C_putative_(DUF679)
REFERENCE	evm.model.scaffold1192_size13234.1	ATP synthase protein I-related protein (Fragment)	noEC	S	AT2G31040.1	ATP_synthase_protein_I-like_protein
REFERENCE	evm.model.scaffold1188_size13387.3	Serine protease SPPA, chloroplastic	EC:3.4.21	OU	AT1G73990.1	signal_peptide_peptidase
REFERENCE	evm.model.scaffold1188_size13387.2	enolase 1, chloroplastic-like	EC:4.2.1.11	G	AT1G74030.1	enolase_1
REFERENCE	evm.model.scaffold1188_size13387.1	protein CHAPERONE-LIKE PROTEIN OF POR1, chloroplastic	noEC	S	AT5G23040.2	cell_growth_defect_factor-like_protein_(DUF3353)
REFERENCE	evm.model.scaffold1185_size13504.4	Uroporphyrinogen decarboxylase	EC:4.1.1.37	H	AT3G14930.2	Uroporphyrinogen_decarboxylase
REFERENCE	evm.model.scaffold1179_size13919.5	xylulose 5-phosphate/phosphate translocator, chloroplastic	EC:2.7.11;EC:2.7.11.22	EG	AT5G17630.1	Nucleotide/sugar_transporter_family_protein
REFERENCE	evm.model.scaffold1179_size13919.2	Chaperone DnaJ-domain superfamily protein	noEC	O	AT5G59610.4	Chaperone_DnaJ-domain_superfamily_protein
REFERENCE	evm.model.scaffold1176_size14172.5	Dihydroxy-acid dehydratase	EC:4.2.1.9	E	AT3G23940.1	dehydratase_family
REFERENCE	evm.model.scaffold1176_size14172.4	Reactive intermediate deaminase a, chloroplastic	noEC	J	AT3G20390.1	endoribonuclease_L-PSP_family_protein
REFERENCE	evm.model.scaffold1174_size14282.1	Malate dehydrogenase	EC:1.1.1.37	C	AT5G43330.1	Lactate/malate_dehydrogenase_family_protein
REFERENCE	evm.model.scaffold1173_size14360.3	Chaperone protein DnaJ	noEC	O	AT1G77930.2	Chaperone_DnaJ-domain_superfamily_protein
REFERENCE	evm.model.scaffold1172_size14410.2	DNA-damage-repair/toleration protein DRT100-like	EC:3.2.1.15	S	AT3G20820.1	Leucine-rich_repeat_(LRR)_family_protein
REFERENCE	evm.model.scaffold1170_size14543.5	Phospholipase-like protein	noEC	G	AT4G18810.2	NAD(P)-binding_Rossmann-fold_superfamily_protein
REFERENCE	evm.model.scaffold1170_size14543.3	outer envelope pore protein 37, chloroplastic	noEC	S	AT2G43950.1	chloroplast_outer_envelope_protein_37
REFERENCE	evm.model.scaffold1162_size14770.3	inactive LRR receptor-like serine/threonine-protein kinase BIR2	EC:2.7.11	T	AT3G28450.1	Leucine-rich_repeat_protein_kinase_family_protein
REFERENCE	evm.model.scaffold1157_size14928.2	Os01g0235100 protein	noEC	S	noTAIR	NULL
REFERENCE	evm.model.scaffold1157_size14928.1	Heat shock protein Hsp90 family protein	noEC	none	AT2G48070.2	resistance_to_phytophthora_1
REFERENCE	evm.model.scaffold1156_size14945.1	RNA polymerase sigma factor sigA	noEC	K	AT1G64860.1	sigma_factor_A
REFERENCE	evm.model.scaffold1155_size15020.1	multiple organellar RNA editing factor 8, chloroplastic/mitochondrial-like	noEC	S	AT3G15000.1	cobalt_ion_binding_protein
REFERENCE	evm.model.scaffold1152_size15161.3	Prohibitin-6, mitochondrial	noEC	O	AT1G03860.2	prohibitin_2
REFERENCE	evm.model.scaffold1152_size15161.2	prohibitin-1, mitochondrial-like	noEC	O	AT4G28510.1	prohibitin_1
REFERENCE	evm.model.scaffold1147_size15341.4	Protein fatty acid export 3, chloroplastic	noEC	S	AT2G38550.1	Transmembrane_proteins_14C
REFERENCE	evm.model.scaffold1144_size15427.3	protein SPA, chloroplastic	EC:5.3.4.1	S	AT1G75690.1	DnaJ/Hsp40_cysteine-rich_domain_superfamily_protein
REFERENCE	evm.model.scaffold1142_size15455.5	xylulose 5-phosphate/phosphate translocator, chloroplastic	EC:2.7.11;EC:2.7.11.22	EG	AT5G17630.1	Nucleotide/sugar_transporter_family_protein
REFERENCE	evm.model.scaffold1142_size15455.2	Chaperone DnaJ-domain superfamily protein	noEC	O	AT5G59610.4	Chaperone_DnaJ-domain_superfamily_protein
REFERENCE	evm.model.scaffold1141_size15467.3	psbP domain-containing protein 6, chloroplastic	noEC	S	AT3G56650.1	thylakoid_lumenal_protein_(Mog1/PsbP/DUF1795-like_photosystem_II_reaction_center_PsbP_family_protein)
REFERENCE	evm.model.scaffold1140_size15692.1	Lon protease homolog, mitochondrial	EC:3.4.21;EC:3.6.1.3;EC:3.6.1.15	O	AT5G26860.1	lon_protease_1
REFERENCE	evm.model.scaffold1136_size15778.2	Allene oxide synthase	EC:4.2.1.92	Q	AT5G42650.1	allene_oxide_synthase
REFERENCE	evm.model.scaffold1134_size15918.1	Phosphoribosylformylglycinamidine synthase	EC:6.3.5.3	F	AT1G74260.1	purine_biosynthesis_4
REFERENCE	evm.model.scaffold1127_size16359.4	Fructokinase-like 2, chloroplastic	noEC	G	AT1G69200.1	fructokinase-like_protein
REFERENCE	evm.model.scaffold1126_size16433.1	bifunctional 3-dehydroquinate dehydratase/shikimate dehydrogenase, chloroplastic-like	EC:1.1.1.25;EC:4.2.1.10;EC:1.1.1.282	E	AT3G06350.1	dehydroquinate_dehydratase%2C_putative_/_shikimate_dehydrogenase
REFERENCE	evm.model.scaffold1125_size16441.2	CDP-diacylglycerol--glycerol-3-phosphate 3-phosphatidyltransferase	EC:2.7.8.5	I	AT2G39290.1	phosphatidylglycerolphosphate_synthase_1
REFERENCE	evm.model.scaffold1123_size16487.3	Proline--tRNA ligase	EC:6.1.1.15	J	AT5G52520.1	Class_II_aaRS_and_biotin_synthetases_superfamily_protein
REFERENCE	evm.model.scaffold1121_size16516.1	probable GTP diphosphokinase RSH2, chloroplastic	EC:2.7.6.5;EC:3.1.7.2	T	AT1G54130.1	RELA/SPOT_homolog_3
REFERENCE	evm.model.scaffold1106_size16974.4	DAR GTPase 3, chloroplastic	EC:3.6.1.15	S	AT4G02790.1	GTP-binding_family_protein
REFERENCE	evm.model.scaffold1101_size17343.5	V-type proton ATPase subunit C	EC:3.6.1.3;EC:7.1.2.1;EC:3.6.1.15	C	AT1G12840.1	vacuolar_ATP_synthase_subunit_C_(VATC)_/_V-ATPase_C_subunit_/_vacuolar_proton_pump_C_subunit_(DET3)
REFERENCE	evm.model.scaffold1092_size17866.3	Methionine aminopeptidase	EC:3.4.11	O	AT1G13270.1	methionine_aminopeptidase_1B
REFERENCE	evm.model.scaffold1091_size17896.3	inactive LRR receptor-like serine/threonine-protein kinase BIR2	EC:2.7.11	T	AT3G28450.1	Leucine-rich_repeat_protein_kinase_family_protein
REFERENCE	evm.model.scaffold1087_size18152.3	50S ribosomal protein L5, chloroplastic	noEC	J	AT4G01310.1	Ribosomal_L5P_family_protein
REFERENCE	evm.model.scaffold1083_size18907.2	GTP-binding protein BRASSINAZOLE INSENSITIVE PALE GREEN 2, chloroplastic-like	EC:1.14.13.39;EC:1.14.13;EC:3.6.1.15	C	AT3G57180.1	P-loop_containing_nucleoside_triphosphate_hydrolases_superfamily_protein
REFERENCE	evm.model.scaffold1080_size18956.6	Chloroplastic heat shock protein 90	noEC	O	AT2G04030.2	Chaperone_protein_htpG_family_protein
REFERENCE	evm.model.scaffold1080_size18956.2	NAD(P)-binding Rossmann-fold superfamily protein isoform 1	noEC	none	AT2G39080.1	NAD(P)-binding_Rossmann-fold_superfamily_protein
REFERENCE	evm.model.scaffold1076_size19232.4	GDP-fucose protein O-fucosyltransferase (Fragment)	noEC	G	AT5G35570.1	O-fucosyltransferase_family_protein
REFERENCE	evm.model.scaffold1076_size19232.3	Tubulin--tyrosine ligase-like protein 12	noEC	O	AT1G77550.1	tubulin-tyrosine_ligase
REFERENCE	evm.model.scaffold1063_size20688.2	Pentatricopeptide repeat-containing protein, chloroplastic	noEC	S	AT3G63370.1	Tetratricopeptide_repeat_(TPR)-like_superfamily_protein
REFERENCE	evm.model.scaffold1055_size21087.4	Peptidyl-prolyl cis-trans isomerase	EC:5.2.1.8	O	AT2G16600.1	rotamase_CYP_3
REFERENCE	evm.model.scaffold1046_size21631.3	Malate dehydrogenase, chloroplastic	EC:1.6.1.1;EC:1.1.1.37	C	AT3G47520.1	malate_dehydrogenase
REFERENCE	evm.model.scaffold1043_size21697.3	Serine/threonine protein kinase	EC:2.7.11	T	AT2G01210.1	Leucine-rich_repeat_protein_kinase_family_protein
REFERENCE	evm.model.scaffold1042_size21777.5	Dihydroorotase, mitochondrial	EC:3.5.2.3	F	AT4G22930.2	pyrimidin_4
REFERENCE	evm.model.scaffold1041_size21800.3	Chaperonin CPN60-2, mitochondrial	noEC	O	AT3G23990.1	heat_shock_protein_60
REFERENCE	evm.model.scaffold1038_size22408.2	protein RETICULATA-RELATED 3, chloroplastic-like	noEC	S	AT3G08640.1	alphavirus_core_family_protein_(DUF3411)
REFERENCE	evm.model.scaffold1036_size22764.5	probable sodium/metabolite cotransporter BASS5, chloroplastic isoform X1	noEC	P	AT4G22840.1	Sodium_Bile_acid_symporter_family
REFERENCE	evm.model.scaffold1033_size23071.1	1,4-alpha-glucan-branching enzyme 1, chloroplastic/amyloplastic	EC:2.4.1.18	G	AT5G03650.1	starch_branching_enzyme_2.2
REFERENCE	evm.model.scaffold1032_size23090.2	Cysteine protease	EC:3.4.22;EC:1.3.1.74	O	AT1G47128.1	Granulin_repeat_cysteine_protease_family_protein
REFERENCE	evm.model.scaffold1029_size23488.7	Potassium transporter	noEC	P	AT1G60160.1	Potassium_transporter_family_protein
REFERENCE	evm.model.scaffold1029_size23488.4	Beta-glucosidase 40-like	EC:3.2.1.21;EC:3.2.1.23;EC:3.2.1.39;EC:3.2.1.38	G	AT1G26560.1	beta_glucosidase_40
REFERENCE	evm.model.scaffold1029_size23488.3	beta-glucosidase 40-like	EC:3.2.1.21;EC:3.2.1.23;EC:3.2.1.39;EC:3.2.1.38	G	AT5G54570.3	beta_glucosidase_41
REFERENCE	evm.model.scaffold1022_size23813.5	Pentatricopeptide repeat-containing protein	noEC	S	AT5G04780.1	Pentatricopeptide_repeat_(PPR)_superfamily_protein
REFERENCE	evm.model.scaffold1019_size23903.3	Serine protease SPPA, chloroplastic	EC:3.4.21	OU	AT1G73990.1	signal_peptide_peptidase
REFERENCE	evm.model.scaffold1019_size23903.2	enolase 1, chloroplastic-like	EC:4.2.1.11	G	AT1G74030.1	enolase_1
REFERENCE	evm.model.scaffold1019_size23903.1	protein CHAPERONE-LIKE PROTEIN OF POR1, chloroplastic	noEC	S	AT5G23040.2	cell_growth_defect_factor-like_protein_(DUF3353)
REFERENCE	evm.model.scaffold1018_size24047.3	Peptidyl-prolyl cis-trans isomerase	EC:5.2.1.8	O	AT2G21130.1	Cyclophilin-like_peptidyl-prolyl_cis-trans_isomerase_family_protein
REFERENCE	evm.model.scaffold1014_size24417.1	MLP-like protein 34-like	noEC	S	AT1G70830.5	MLP-like_protein_28
REFERENCE	evm.model.scaffold1012_size24664.2	Ribulose bisphosphate carboxylase/oxygenase activase, chloroplastic-like	noEC	O	AT1G73110.1	P-loop_containing_nucleoside_triphosphate_hydrolases_superfamily_protein
REFERENCE	evm.model.scaffold1012_size24664.1	protein TIC 40, chloroplastic	noEC	OT	AT5G16620.1	hydroxyproline-rich_glycoprotein_family_protein
REFERENCE	evm.model.scaffold993_size26001.5	Ferredoxin--nitrite reductase, chloroplastic	EC:1.7.2.1;EC:1.7.7.1	P	AT2G15620.1	nitrite_reductase_1
REFERENCE	evm.model.scaffold991_size26200.5	DEAD-box ATP-dependent RNA helicase 31-like	EC:3.6.1.3;EC:3.6.4.13;EC:3.6.1.15	A	AT5G08610.1	P-loop_containing_nucleoside_triphosphate_hydrolases_superfamily_protein
REFERENCE	evm.model.scaffold987_size26497.5	Alpha-glucan water dikinase, chloroplastic	EC:2.7.9.4	G	AT1G10760.3	Pyruvate_phosphate_dikinase%2C_PEP/pyruvate_binding_domain-containing_protein
REFERENCE	evm.model.scaffold986_size26532.2	Pentatricopeptide repeat-containing protein	noEC	S	AT1G30290.1	Tetratricopeptide_repeat_(TPR)-like_superfamily_protein
REFERENCE	evm.model.scaffold978_size26980.7	Monofunctional riboflavin biosynthesis protein riba 3, chloroplastic	EC:3.5.4.25;EC:4.1.99.12	H	AT5G59750.1	monofunctional_riboflavin_biosynthesis_protein_RIBA_3
REFERENCE	evm.model.scaffold976_size27186.6	CDP-diacylglycerol--glycerol-3-phosphate 3-phosphatidyltransferase	EC:2.7.8.5	I	AT2G39290.1	phosphatidylglycerolphosphate_synthase_1
REFERENCE	evm.model.scaffold976_size27186.2	probable protein phosphatase 2C 26 isoform X2	EC:3.1.3.16	T	AT2G30170.1	Protein_phosphatase_2C_family_protein
REFERENCE	evm.model.scaffold975_size27401.1	Thiamin biosynthesis protein isoform 1	EC:2.7.1.49;EC:2.7.4.7;EC:2.5.1.3	HK	AT1G22940.1	thiamin_biosynthesis_protein
REFERENCE	evm.model.scaffold971_size27813.3	RING-type E3 ubiquitin transferase	noEC	S	AT1G24330.2	ARM_repeat_superfamily_protein
REFERENCE	evm.model.scaffold971_size27813.2	Chlorophyll a-b binding protein, chloroplastic	noEC	C	AT3G61470.1	photosystem_I_light_harvesting_complex_protein
REFERENCE	evm.model.scaffold965_size28123.1	Threonine--tRNA ligase, cytoplasmic	EC:6.1.1.3	J	AT5G26830.1	Threonyl-tRNA_synthetase
REFERENCE	evm.model.scaffold964_size28131.8	Digalactosyldiacylglycerol synthase 2, chloroplastic	EC:2.4.1.241	S	AT4G00550.2	digalactosyl_diacylglycerol_deficient_2
REFERENCE	evm.model.scaffold955_size29548.4	ATP-dependent zinc metalloprotease FTSH 7, chloroplastic	EC:3.4.24;EC:3.6.1.3;EC:3.6.1.15;EC:3.6.4.3	O	AT5G58870.1	FTSH_protease_9
REFERENCE	evm.model.scaffold949_size30103.1	DNA mismatch repair protein MSH1, mitochondrial isoform X2	EC:3.6.1.3;EC:3.6.1.15	L	AT3G24320.1	MUTL_protein_homolog_1
REFERENCE	evm.model.scaffold947_size30245.4	Peptidyl-prolyl cis-trans isomerase	EC:5.2.1.8	O	AT2G16600.1	rotamase_CYP_3
REFERENCE	evm.model.scaffold943_size30680.6	sec-independent protein translocase protein TATB, chloroplastic-like isoform X4	EC:7.4.2.3;EC:7.4.2.4	U	AT5G52440.1	Bacterial_sec-independent_translocation_protein_mttA/Hcf106
REFERENCE	evm.model.scaffold941_size30928.2	Pentatricopeptide repeat-containing protein	noEC	S	AT4G19220.1	Tetratricopeptide_repeat_(TPR)-like_superfamily_protein
REFERENCE	evm.model.scaffold932_size32227.6	Ascorbate peroxidase	EC:1.11.1.5;EC:1.11.1.7;EC:1.11.1.11	E	AT4G35000.1	ascorbate_peroxidase_3
REFERENCE	evm.model.scaffold932_size32227.1	Protein-methionine-sulfoxide reductase catalytic subunit MsrP like	noEC	S	AT3G20680.1	plant/protein_(DUF1995)
REFERENCE	evm.model.scaffold931_size32507.2	Heterodimeric geranylgeranyl pyrophosphate synthase small subunit, chloroplastic	EC:1.3.1.74;EC:2.5.1.29	H	AT4G38460.1	geranylgeranyl_reductase
REFERENCE	evm.model.scaffold929_size32888.6	Chloroplast channel forming outer membrane protein	noEC	S	AT1G76405.2	outer_envelope_pore_21B-like_protein
REFERENCE	evm.model.scaffold929_size32888.5	Localized to the inner membrane of the chloroplast	noEC	none	AT1G42960.1	inner_membrane_localized_protein
REFERENCE	evm.model.scaffold927_size33562.4	(-)-alpha-terpineol synthase	EC:4.2.3.20;EC:4.2.3.14;EC:4.2.3.15;EC:4.2.3.106;EC:4.2.3.16	S	AT3G25820.4	terpene_synthase-like_sequence-1%2C8-cineole
REFERENCE	evm.model.scaffold925_size33834.6	Chlorophyll a-b binding protein, chloroplastic	noEC	C	AT3G61470.1	photosystem_I_light_harvesting_complex_protein
REFERENCE	evm.model.scaffold925_size33834.5	40S ribosomal protein SA	noEC	J	AT3G04770.2	40s_ribosomal_protein_SA_B
REFERENCE	evm.model.scaffold925_size33834.3	RING-type E3 ubiquitin transferase	noEC	S	AT1G24330.2	ARM_repeat_superfamily_protein
REFERENCE	evm.model.scaffold921_size34329.11	Kinesin-like protein	EC:3.6.1.3;EC:3.6.1.15	Z	AT5G02370.1	ATP_binding_microtubule_motor_family_protein
REFERENCE	evm.model.scaffold921_size34329.10	Kinesin-like protein	EC:3.6.1.3;EC:3.6.1.15	Z	AT5G02370.1	ATP_binding_microtubule_motor_family_protein
REFERENCE	evm.model.scaffold919_size34446.5	Lipoxygenase	EC:1.13.11;EC:1.13.11.12	E	AT1G17420.1	lipoxygenase_3
REFERENCE	evm.model.scaffold919_size34446.2	Alanine aminotransferase 2	EC:2.6.1.12;EC:2.6.1.2	E	AT1G72330.1	alanine_aminotransferase_2
REFERENCE	evm.model.scaffold918_size34464.5	Bifunctional aspartate aminotransferase and glutamate/aspartate-prephenate aminotransferase	EC:2.6.1.78;EC:2.6.1.79;EC:2.6.1.1	E	AT2G22250.3	aspartate_aminotransferase
REFERENCE	evm.model.scaffold917_size34847.9	Rhodanese-like domain-containing protein 11, chloroplastic	noEC	S	AT4G24750.1	Rhodanese/Cell_cycle_control_phosphatase_superfamily_protein
REFERENCE	evm.model.scaffold917_size34847.2	Solanesyl diphosphate synthase	EC:2.5.1.29;EC:2.5.1.30;EC:2.5.1.85;EC:2.5.1.84	H	AT1G78510.1	solanesyl_diphosphate_synthase_1
REFERENCE	evm.model.scaffold917_size34847.1	Putative membrane protein	noEC	S	AT1G78620.2	integral_membrane_protein_(Protein_of_unknown_function_DUF92%2C_transmembrane)
REFERENCE	evm.model.scaffold915_size35427.4	Early light-induced protein 1, chloroplastic	noEC	S	AT3G22840.1	Chlorophyll_A-B_binding_family_protein
REFERENCE	evm.model.scaffold914_size35904.1	Delta-1-pyrroline-5-carboxylate synthase	EC:1.2.1.41;EC:2.7.2.11	E	AT3G55610.1	delta_1-pyrroline-5-carboxylate_synthase_2
REFERENCE	evm.model.scaffold910_size36566.5	probable plastid-lipid-associated protein 7, chloroplastic	noEC	S	AT5G09820.2	Plastid-lipid_associated_protein_PAP_/_fibrillin_family_protein
REFERENCE	evm.model.scaffold908_size36787.12	Uncharacterized protein	noEC	none	AT5G16660.1	Low-density_receptor-like_protein
REFERENCE	evm.model.scaffold907_size36840.3	Pyruvate, phosphate dikinase	EC:2.7.9.1	F	AT4G15530.4	pyruvate_orthophosphate_dikinase
REFERENCE	evm.model.scaffold906_size36960.7	Probable 6-phosphogluconolactonase	EC:3.1.1.31;EC:3.1.1.1	G	AT5G24400.1	NagB/RpiA/CoA_transferase-like_superfamily_protein
REFERENCE	evm.model.scaffold906_size36960.6	Probable 6-phosphogluconolactonase	EC:3.1.1.31;EC:3.1.1.1	G	AT5G24400.1	NagB/RpiA/CoA_transferase-like_superfamily_protein
REFERENCE	evm.model.scaffold905_size37019.8	Pentatricopeptide repeat-containing protein	noEC	S	AT2G15690.1	Tetratricopeptide_repeat_(TPR)-like_superfamily_protein
REFERENCE	evm.model.scaffold905_size37019.4	40s ribosomal protein s16	noEC	J	AT2G09990.1	Ribosomal_protein_S5_domain_2-like_superfamily_protein
REFERENCE	evm.model.scaffold904_size37068.4	Thiamine phosphate synthase	noEC	O	AT1G03160.1	FZO-like_protein
REFERENCE	evm.model.scaffold904_size37068.1	rho GTPase-activating protein 7-like	noEC	T	AT5G19390.2	Rho_GTPase_activation_protein_(RhoGAP)_with_PH_domain-containing_protein
REFERENCE	evm.model.scaffold902_size37658.9	Allene oxide synthase	EC:4.2.1.92	Q	AT5G42650.1	allene_oxide_synthase
REFERENCE	evm.model.scaffold901_size37753.2	Chlorophyll a-b binding protein, chloroplastic	noEC	C	AT1G29930.1	chlorophyll_A/B_binding_protein_1
REFERENCE	evm.model.scaffold901_size37753.1	Chlorophyll a-b binding protein, chloroplastic	noEC	C	AT1G29930.1	chlorophyll_A/B_binding_protein_1
REFERENCE	evm.model.scaffold900_size37806.4	Glyceraldehyde-3-phosphate dehydrogenase	noEC	G	AT1G42970.1	glyceraldehyde-3-phosphate_dehydrogenase_B_subunit
REFERENCE	evm.model.scaffold900_size37806.2	serine/threonine-protein kinase CDL1-like	EC:2.7.11	T	AT1G20650.1	Protein_kinase_superfamily_protein
REFERENCE	evm.model.scaffold900_size37806.1	Serine/threonine-protein kinase	EC:2.7.11	T	AT1G20650.1	Protein_kinase_superfamily_protein
REFERENCE	evm.model.scaffold899_size37830.3	glycine-rich RNA-binding protein 4, mitochondrial-like	noEC	A	AT5G06210.1	RNA_binding_(RRM/RBD/RNP_motifs)_family_protein
REFERENCE	evm.model.scaffold898_size38958.8	RAP domain-containing protein, chloroplastic	noEC	S	AT2G31890.1	RAP
REFERENCE	evm.model.scaffold897_size38969.4	mitochondrial outer membrane protein porin of 34 kDa	noEC	P	AT3G01280.1	voltage_dependent_anion_channel_1
REFERENCE	evm.model.scaffold893_size39817.1	Isocitrate dehydrogenase [NADP]	EC:1.1.1.42	C	AT1G65930.1	cytosolic_NADP+-dependent_isocitrate_dehydrogenase
REFERENCE	evm.model.scaffold892_size39960.5	sulfoquinovosyl transferase SQD2	EC:3.6.1.15	IMO	AT5G01220.2	sulfoquinovosyldiacylglycerol_2
REFERENCE	evm.model.scaffold892_size39960.4	sulfoquinovosyl transferase SQD2-like	noEC	IMO	AT5G01220.1	sulfoquinovosyldiacylglycerol_2
REFERENCE	evm.model.scaffold891_size40067.9	9-cis-epoxycarotenoid dioxygenase nced1, chloroplastic	EC:1.13.11;EC:1.13.11.51	Q	AT3G14440.1	nine-cis-epoxycarotenoid_dioxygenase_3
REFERENCE	evm.model.scaffold891_size40067.8	Pyruvate dehydrogenase E1 component subunit beta	EC:1.2.4.1	C	AT2G34590.1	Transketolase_family_protein
REFERENCE	evm.model.scaffold891_size40067.5	translation initiation factor IF-2, chloroplastic	EC:3.6.1.15	J	AT1G17220.1	Translation_initiation_factor_2%2C_small_GTP-binding_protein
REFERENCE	evm.model.scaffold888_size40586.4	DEAD-box ATP-dependent RNA helicase 31-like	EC:3.6.1.3;EC:3.6.4.13;EC:3.6.1.15	A	AT5G08610.1	P-loop_containing_nucleoside_triphosphate_hydrolases_superfamily_protein
REFERENCE	evm.model.scaffold887_size41067.7	Putative WAS/WASL-interacting protein family member 1-like	noEC	none	AT1G30475.3	hypothetical_protein
REFERENCE	evm.model.scaffold886_size41218.6	ribonuclease J-like isoform X1	noEC	AK	AT5G63420.1	RNA-metabolising_metallo-beta-lactamase_family_protein
REFERENCE	evm.model.scaffold885_size41222.11	Acyl-[acyl-carrier-protein] hydrolase	noEC	I	AT1G08510.1	fatty_acyl-ACP_thioesterases_B
REFERENCE	evm.model.scaffold885_size41222.10	Heme oxygenase 1, chloroplastic-like	EC:1.14.99.3	P	AT2G26670.2	Plant_heme_oxygenase_(decyclizing)_family_protein
REFERENCE	evm.model.scaffold884_size41633.6	probable Xaa-Pro aminopeptidase P	EC:3.4.11	E	AT3G05350.1	Metallopeptidase_M24_family_protein
REFERENCE	evm.model.scaffold884_size41633.5	Xaa-Pro aminopeptidase	EC:3.4.11	E	AT3G05350.1	Metallopeptidase_M24_family_protein
REFERENCE	evm.model.scaffold884_size41633.1	Photosystem II reaction center PsbP family protein	noEC	S	AT3G05410.1	Photosystem_II_reaction_center_PsbP_family_protein
REFERENCE	evm.model.scaffold880_size42587.8	Sal-like protein	noEC	K	AT3G47850.1	tRNA_(Ile)-lysidine_synthase
REFERENCE	evm.model.scaffold879_size42848.3	vacuolar amino acid transporter 1-like isoform X1	noEC	E	AT2G39130.2	Transmembrane_amino_acid_transporter_family_protein
REFERENCE	evm.model.scaffold879_size42848.2	Ribonuclease II, chloroplastic/mitochondrial	EC:3.1.13;EC:3.1.15	J	AT5G02250.1	Ribonuclease_II/R_family_protein
REFERENCE	evm.model.scaffold872_size43666.3	Cell division protein FtsY-like protein, chloroplastic	EC:3.6.1.15	U	AT2G45770.1	signal_recognition_particle_receptor_protein%2C_chloroplast_(FTSY)
REFERENCE	evm.model.scaffold870_size44295.10	1,4-alpha-glucan-branching enzyme 1, chloroplastic/amyloplastic	EC:2.4.1.18	G	AT5G03650.1	starch_branching_enzyme_2.2
REFERENCE	evm.model.scaffold868_size44554.9	4-diphosphocytidyl-2-C-methyl-D-erythritol kinase	EC:2.7.1.148	H	AT2G26930.1	4-(cytidine_5-phospho)-2-C-methyl-D-erithritol_kinase
REFERENCE	evm.model.scaffold866_size44941.6	Uncharacterized protein	noEC	S	AT5G46090.1	transmembrane_protein%2C_putative_(DUF679)
REFERENCE	evm.model.scaffold865_size45177.4	20 kDa chaperonin, chloroplastic	noEC	O	AT5G20720.4	chaperonin_20
REFERENCE	evm.model.scaffold862_size45560.20	thioredoxin M3, chloroplastic	EC:1.8.1.9;EC:1.8.1.8	O	AT2G15570.1	Thioredoxin_superfamily_protein
REFERENCE	evm.model.scaffold860_size45686.3	ATP-dependent 6-phosphofructokinase	EC:2.7.1.11	G	AT5G61580.1	phosphofructokinase_4
REFERENCE	evm.model.scaffold859_size45766.3	ATP-dependent 6-phosphofructokinase	EC:2.7.1.11	G	AT5G61580.1	phosphofructokinase_4
REFERENCE	evm.model.scaffold855_size46386.2	Fha domain-containing protein ddl	noEC	T	AT3G20550.1	SMAD/FHA_domain-containing_protein
REFERENCE	evm.model.scaffold854_size46396.6	28 kDa ribonucleoprotein, chloroplastic	noEC	A	AT5G50250.1	chloroplast_RNA-binding_protein_31B
REFERENCE	evm.model.scaffold853_size46902.12	Wd-40 repeat-containing protein msi1	noEC	B	AT5G58230.1	Transducin/WD40_repeat-like_superfamily_protein
REFERENCE	evm.model.scaffold851_size47108.5	Stromal 70 kDa heat shock-related protein, chloroplastic	noEC	O	AT4G24280.1	chloroplast_heat_shock_protein_70-1
REFERENCE	evm.model.scaffold849_size47571.6	U-box domain-containing protein 4	noEC	S	AT5G14510.1	ARM_repeat_superfamily_protein
REFERENCE	evm.model.scaffold847_size47669.6	Phospho-2-dehydro-3-deoxyheptonate aldolase	EC:2.5.1.54	E	AT4G33510.2	3-deoxy-d-arabino-heptulosonate_7-phosphate_synthase
REFERENCE	evm.model.scaffold847_size47669.2	D-3-phosphoglycerate dehydrogenase	EC:1.1.1.95	E	AT3G19480.1	D-3-phosphoglycerate_dehydrogenase
REFERENCE	evm.model.scaffold841_size49873.10	Chlorophyll a-b binding protein, chloroplastic	noEC	C	AT1G29930.1	chlorophyll_A/B_binding_protein_1
REFERENCE	evm.model.scaffold841_size49873.5	Nucleoid-associated protein YbaB/EbfC family	noEC	L	AT4G30620.1	Putative_BCR%2C_YbaB_family_COG0718
REFERENCE	evm.model.scaffold839_size50828.10	50S ribosomal protein L19, chloroplastic-like	noEC	J	AT5G47190.1	Ribosomal_protein_L19_family_protein
REFERENCE	evm.model.scaffold834_size52220.11	50S ribosomal protein L4, chloroplastic	EC:5.2.1.8	J	AT1G07320.2	ribosomal_protein_L4
REFERENCE	evm.model.scaffold829_size53678.1	Serine/threonine protein kinase	EC:2.7.11;EC:1.3.1.74	T	AT2G01210.1	Leucine-rich_repeat_protein_kinase_family_protein
REFERENCE	evm.model.scaffold828_size53878.20	protein high chlorophyll fluorescent 107-like	noEC	S	AT3G17040.1	high_chlorophyll_fluorescent_107
REFERENCE	evm.model.scaffold825_size54338.14	NAD-dependent malate dehydrogenase	EC:1.6.1.1;EC:1.1.1.37	C	AT3G47520.1	malate_dehydrogenase
REFERENCE	evm.model.scaffold825_size54338.11	Betaine aldehyde dehydrogenase 1, chloroplastic	EC:1.2.1.8;EC:1.2.1.3	C	AT1G74920.1	aldehyde_dehydrogenase_10A8
REFERENCE	evm.model.scaffold825_size54338.3	protein PTST, chloroplastic isoform X2	noEC	G	AT5G39790.3	PROTEIN_TARGETING_TO_STARCH_(PTST)
REFERENCE	evm.model.scaffold823_size54560.12	Fatty acyl-CoA reductase	EC:1.2.1.84	I	AT3G44540.1	fatty_acid_reductase_4
REFERENCE	evm.model.scaffold823_size54560.7	Malic enzyme	EC:1.1.1.38;EC:1.1.1.39;EC:1.1.1.40	C	AT1G79750.1	NADP-malic_enzyme_4
REFERENCE	evm.model.scaffold823_size54560.5	Carotenoid cleavage dioxygenase 1	EC:1.13.11;EC:1.13.11.51	Q	AT3G63520.1	carotenoid_cleavage_dioxygenase_1
REFERENCE	evm.model.scaffold822_size54770.13	triose phosphate/phosphate translocator, chloroplastic	noEC	EG	AT5G46110.2	Glucose-6-phosphate/phosphate_translocator-like_protein
REFERENCE	evm.model.scaffold820_size56079.15	Oxalate--CoA ligase-like	EC:6.2.1.12;EC:6.2.1.8	I	AT3G48990.1	AMP-dependent_synthetase_and_ligase_family_protein
REFERENCE	evm.model.scaffold820_size56079.12	Sal-like protein	noEC	K	AT3G47850.1	tRNA_(Ile)-lysidine_synthase
REFERENCE	evm.model.scaffold820_size56079.10	Putative beta-1,3-galactosyltransferase 20	noEC	G	AT5G62620.2	Galactosyltransferase_family_protein
REFERENCE	evm.model.scaffold820_size56079.9	Putative aldehyde dehydrogenase	EC:1.5.1.12	C	AT5G62530.1	aldehyde_dehydrogenase_12A1
REFERENCE	evm.model.scaffold820_size56079.3	Chaperone protein ClpC1, chloroplastic	noEC	O	AT5G50920.1	CLPC_homologue_1
REFERENCE	evm.model.scaffold820_size56079.2	ATP-dependent Clp protease ATP-binding subunit ClpA homolog CD4B, chloroplastic-like	noEC	O	AT5G50920.1	CLPC_homologue_1
REFERENCE	evm.model.scaffold818_size56322.10	Calnexin-like protein	noEC	O	AT5G61790.1	calnexin_1
REFERENCE	evm.model.scaffold818_size56322.9	magnesium protoporphyrin IX methyltransferase, chloroplastic	EC:2.1.1.11	H	AT4G25080.6	magnesium-protoporphyrin_IX_methyltransferase
REFERENCE	evm.model.scaffold816_size56846.5	alpha-glucan water dikinase, chloroplastic isoform X2	EC:2.7.9.4	H	noTAIR	NULL
REFERENCE	evm.model.scaffold816_size56846.3	Alpha-glucan water dikinase, chloroplastic	EC:2.7.9.4	G	AT1G10760.3	Pyruvate_phosphate_dikinase%2C_PEP/pyruvate_binding_domain-containing_protein
REFERENCE	evm.model.scaffold816_size56846.1	alpha-glucan water dikinase, chloroplastic isoform X2	EC:2.7.9.4	G	AT1G10760.3	Pyruvate_phosphate_dikinase%2C_PEP/pyruvate_binding_domain-containing_protein
REFERENCE	evm.model.scaffold810_size58437.13	Transcription factor, putative	noEC	S	AT5G47110.1	Chlorophyll_A-B_binding_family_protein
REFERENCE	evm.model.scaffold809_size58674.11	Uracil phosphoribosyltransferase	EC:2.7.1.48;EC:2.4.2.9	TZ	AT3G53900.1	uracil_phosphoribosyltransferase
REFERENCE	evm.model.scaffold809_size58674.9	Acetyl-coenzyme a carboxylase carboxyl transferase subunit alpha, chloroplastic	EC:6.4.1.2	I	AT2G38040.2	acetyl_Co-enzyme_a_carboxylase_carboxyltransferase_alpha_subunit
REFERENCE	evm.model.scaffold809_size58674.5	Chlorophyll synthase, chloroplastic	EC:2.5.1.62	H	AT3G51820.1	UbiA_prenyltransferase_family_protein
REFERENCE	evm.model.scaffold809_size58674.2	elongation factor P-like	noEC	J	AT3G08740.1	elongation_factor_P_(EF-P)_family_protein
REFERENCE	evm.model.scaffold806_size59925.12	magnesium transporter MRS2-11, chloroplastic	noEC	P	AT5G22830.2	magnesium_(Mg)_transporter_10
REFERENCE	evm.model.scaffold806_size59925.3	Protein kinase	EC:7.2.2.2	I	AT3G07700.4	Protein_kinase_superfamily_protein
TEST	evm.model.scaffold805_size60286.2	phenylalanine--tRNA ligase, chloroplastic/mitochondrial-like	EC:6.1.1.20	J	AT3G58140.1	phenylalanyl-tRNA_synthetase_class_IIc_family_protein
REFERENCE	evm.model.scaffold801_size61522.6	Histone H4	noEC	B	AT5G59970.2	Histone_superfamily_protein
REFERENCE	evm.model.scaffold799_size61746.3	Argininosuccinate lyase	EC:4.3.2.1	E	AT5G10920.1	L-Aspartase-like_family_protein
TEST	evm.model.scaffold798_size61987.14	Rossmann-like alpha/beta/alpha sandwich fold containing protein	noEC	none	AT5G66090.1	cell_wall_integrity/stress_response_component
REFERENCE	evm.model.scaffold796_size62676.12	glucose and ribitol dehydrogenase-like	EC:1.1.1.2	Q	AT1G54870.2	NAD(P)-binding_Rossmann-fold_superfamily_protein
REFERENCE	evm.model.scaffold795_size62889.8	40s ribosomal protein s16	noEC	J	AT2G09990.1	Ribosomal_protein_S5_domain_2-like_superfamily_protein
REFERENCE	evm.model.scaffold791_size64248.3	Histone H4	noEC	B	AT5G59970.2	Histone_superfamily_protein
REFERENCE	evm.model.scaffold791_size64248.1	3-ketoacyl-coa thiolase 2, peroxisomal	EC:2.3.1.16	I	AT2G33150.1	peroxisomal_3-ketoacyl-CoA_thiolase_3
REFERENCE	evm.model.scaffold790_size64319.2	Dihydrolipoyl dehydrogenase 2, chloroplastic	EC:1.8.1.4	C	AT3G16950.1	lipoamide_dehydrogenase_1
REFERENCE	evm.model.scaffold788_size64895.1	Protein spirrig	noEC	TU	AT1G03060.1	BEACH-DOMAIN_HOMOLOG_A1
REFERENCE	evm.model.scaffold782_size66320.16	Eukaryotic translation initiation factor 3 subunit C like	noEC	none	AT3G32930.2	6%2C7-dimethyl-8-ribityllumazine_synthase
REFERENCE	evm.model.scaffold782_size66320.14	Peptidylprolyl isomerase	EC:5.2.1.8	O	AT5G45680.1	FK506-binding_protein_13
REFERENCE	evm.model.scaffold782_size66320.1	Glutamate--cysteine ligase	EC:6.3.2.2	H	AT4G23100.3	glutamate-cysteine_ligase
REFERENCE	evm.model.scaffold781_size66705.16	Coatomer beta subunit	noEC	S	AT1G66330.2	senescence-associated_family_protein
REFERENCE	evm.model.scaffold781_size66705.7	pentatricopeptide repeat-containing protein At1g80270, mitochondrial-like	noEC	S	AT1G80270.5	PENTATRICOPEPTIDE_REPEAT_596
REFERENCE	evm.model.scaffold781_size66705.1	Chlorophyll a-b binding protein, chloroplastic	noEC	C	AT1G29930.1	chlorophyll_A/B_binding_protein_1
REFERENCE	evm.model.scaffold779_size67710.27	Phosphoenolpyruvate carboxylase	EC:4.1.1.31;EC:4.1.1.32	C	AT2G42600.3	phosphoenolpyruvate_carboxylase_2
REFERENCE	evm.model.scaffold774_size69362.15	Ferredoxin--NADP reductase, chloroplastic	EC:1.18.1;EC:1.18.1.2	C	AT1G20020.1	ferredoxin-NADP[+]-oxidoreductase_2
REFERENCE	evm.model.scaffold774_size69362.11	Phosphoserine aminotransferase	EC:2.6.1.52;EC:3.1.3.3	E	AT2G17630.1	Pyridoxal_phosphate_(PLP)-dependent_transferases_superfamily_protein
REFERENCE	evm.model.scaffold774_size69362.1	Phosphoribosylaminoimidazole carboxylase	EC:4.1.1.21	F	AT2G05140.1	phosphoribosylaminoimidazole_carboxylase_family_protein_/_AIR_carboxylase_family_protein
REFERENCE	evm.model.scaffold772_size70005.8	Photosystem II 22 kDa protein, chloroplastic	noEC	C	AT1G44575.3	Chlorophyll_A-B_binding_family_protein
REFERENCE	evm.model.scaffold765_size72457.13	Pyruvate kinase	EC:2.7.1.40	G	AT5G52920.1	plastidic_pyruvate_kinase_beta_subunit_1
REFERENCE	evm.model.scaffold765_size72457.3	Protein PLASTID TRANSCRIPTIONALLY ACTIVE 7	noEC	none	AT5G24314.1	plastid_transcriptionally_active7
REFERENCE	evm.model.scaffold765_size72457.2	Importin subunit beta-1	noEC	U	AT5G53480.1	ARM_repeat_superfamily_protein
REFERENCE	evm.model.scaffold762_size73340.1	Nuclear pore complex protein	noEC	UY	AT1G14850.1	nucleoporin_155
REFERENCE	evm.model.scaffold761_size73556.10	pentatricopeptide repeat-containing protein At4g30700-like	noEC	S	AT4G30700.1	Pentatricopeptide_repeat_(PPR)_superfamily_protein
REFERENCE	evm.model.scaffold760_size73572.9	threonine--tRNA ligase, chloroplastic/mitochondrial 2	EC:6.1.1.3	J	AT2G04842.2	threonyl-tRNA_synthetase%2C_putative_/_threonine-tRNA_ligase
REFERENCE	evm.model.scaffold760_size73572.8	heat shock protein 90-6, mitochondrial-like	noEC	O	AT3G07770.3	HEAT_SHOCK_PROTEIN_89.1
REFERENCE	evm.model.scaffold756_size75642.20	Dihydrolipoyl dehydrogenase	EC:1.8.1.4	C	AT1G48030.5	mitochondrial_lipoamide_dehydrogenase_1
REFERENCE	evm.model.scaffold756_size75642.19	Dihydrolipoyl dehydrogenase	EC:1.8.1.4;EC:1.6.2.6	C	AT3G17240.3	lipoamide_dehydrogenase_2
REFERENCE	evm.model.scaffold755_size76505.10	14 kDa zinc-binding protein	noEC	T	AT1G31160.1	HISTIDINE_TRIAD_NUCLEOTIDE-BINDING_2
REFERENCE	evm.model.scaffold752_size77146.22	(-)-alpha-terpineol synthase	EC:4.2.3.20;EC:4.2.3.14;EC:4.2.3.15;EC:4.2.3.106;EC:4.2.3.16	S	AT4G16730.2	terpene_synthase_02
REFERENCE	evm.model.scaffold752_size77146.21	Limonene synthase	EC:4.2.3.20;EC:4.2.3.14;EC:4.2.3.15;EC:4.2.3.106;EC:4.2.3.16	S	AT4G16730.2	terpene_synthase_02
REFERENCE	evm.model.scaffold752_size77146.12	valine--tRNA ligase, chloroplastic/mitochondrial 2 isoform X1	EC:6.1.1.9;EC:3.1.1.1	J	AT5G16715.1	protein_EMBRYO_DEFECTIVE_2247
REFERENCE	evm.model.scaffold752_size77146.6	Riboflavin biosynthesis protein pyrd, chloroplastic	EC:3.5.4.26	F	AT4G20960.1	Cytidine/deoxycytidylate_deaminase_family_protein
REFERENCE	evm.model.scaffold752_size77146.3	thioredoxin-like protein CITRX, chloroplastic	EC:5.3.4.1;EC:1.8.1.9;EC:1.8.1.8	C	AT3G06730.1	Thioredoxin_z
REFERENCE	evm.model.scaffold749_size78080.4	1-(5-phosphoribosyl)-5-[(5-phosphoribosylamino)methylideneamino] imidazole-4-carboxamide isomerase, chloroplastic	EC:5.3.1.16	E	AT2G36230.1	Aldolase-type_TIM_barrel_family_protein
TEST	evm.model.scaffold746_size79265.19	thylakoid lumenal 17.9 kDa protein, chloroplastic	noEC	S	AT4G24930.1	thylakoid_lumenal_17.9_kDa_protein%2C_chloroplast
REFERENCE	evm.model.scaffold745_size79788.19	Protein POLLENLESS 3-LIKE 2	noEC	S	AT3G51280.1	Tetratricopeptide_repeat_(TPR)-like_superfamily_protein
REFERENCE	evm.model.scaffold745_size79788.18	protein POLLENLESS 3-LIKE 2-like	noEC	S	AT3G51280.1	Tetratricopeptide_repeat_(TPR)-like_superfamily_protein
REFERENCE	evm.model.scaffold745_size79788.8	ATP-dependent Clp protease proteolytic subunit	EC:3.4.21;EC:3.6.1.3;EC:3.6.1.15	O	AT5G45390.1	CLP_protease_P4
REFERENCE	evm.model.scaffold745_size79788.3	sec-independent protein translocase protein TATA, chloroplastic-like	EC:7.4.2.3;EC:7.4.2.4	U	AT5G28750.1	Bacterial_sec-independent_translocation_protein_mttA/Hcf106
REFERENCE	evm.model.scaffold744_size79833.10	Chlorophyll a-b binding protein, chloroplastic	noEC	P	AT1G29930.1	chlorophyll_A/B_binding_protein_1
REFERENCE	evm.model.scaffold742_size80456.15	Superoxide dismutase	EC:1.15.1.1	P	AT5G23310.1	Fe_superoxide_dismutase_3
REFERENCE	evm.model.scaffold742_size80456.14	Chlorophyll A-B binding protein	noEC	O	AT3G12345.1	FKBP-type_peptidyl-prolyl_cis-trans_isomerase
REFERENCE	evm.model.scaffold742_size80456.3	adenine nucleotide transporter BT1, chloroplastic/mitochondrial	noEC	C	AT4G32400.1	Mitochondrial_substrate_carrier_family_protein
REFERENCE	evm.model.scaffold742_size80456.2	adenine nucleotide transporter BT1, chloroplastic/mitochondrial	noEC	C	AT4G32400.1	Mitochondrial_substrate_carrier_family_protein
REFERENCE	evm.model.scaffold741_size80477.18	lipoxygenase homology domain-containing protein 1-like	noEC	S	AT4G39730.1	Lipase/lipooxygenase%2C_PLAT/LH2_family_protein
REFERENCE	evm.model.scaffold740_size80664.9	Mitochodrial transcription termination factor-related protein	noEC	K	AT4G38160.4	Mitochondrial_transcription_termination_factor_family_protein
REFERENCE	evm.model.scaffold738_size81203.6	Aquaporin PIP2-1	noEC	P	AT2G37170.2	plasma_membrane_intrinsic_protein_2
REFERENCE	evm.model.scaffold737_size81492.2	probable GTP diphosphokinase CRSH, chloroplastic	EC:2.7.6.5	T	AT3G17470.2	Ca2+-activated_RelA/spot-like_protein
REFERENCE	evm.model.scaffold736_size81958.22	Betaine aldehyde dehydrogenase 1, chloroplastic	EC:1.2.1.8;EC:1.2.1.3	C	AT1G74920.1	aldehyde_dehydrogenase_10A8
REFERENCE	evm.model.scaffold734_size82491.3	Lipoxygenase	EC:1.13.11;EC:1.13.11.12	E	noTAIR	NULL
REFERENCE	evm.model.scaffold731_size85304.6	Calreticulin	noEC	O	AT1G56340.2	calreticulin_1a
REFERENCE	evm.model.scaffold730_size86902.12	Nicotinamide adenine dinucleotide transporter 1, chloroplastic	noEC	C	AT2G47490.1	NAD+_transporter_1
REFERENCE	evm.model.scaffold729_size86916.12	K(+) efflux antiporter 2, chloroplastic-like	noEC	P	AT4G00630.1	K+_efflux_antiporter_2
REFERENCE	evm.model.scaffold729_size86916.9	Protein-ribulosamine 3-kinase, chloroplastic	EC:2.7.1.172	G	AT3G61080.1	Protein_kinase_superfamily_protein
REFERENCE	evm.model.scaffold728_size87572.7	DDT domain-containing protein PTM-like	noEC	BK	AT5G22760.1	PHD_finger_family_protein
REFERENCE	evm.model.scaffold726_size87774.1	Calcium-transporting ATPase	EC:3.6.1.3;EC:7.2.2.10;EC:3.6.1.15	P	AT3G57330.1	autoinhibited_Ca2+-ATPase_11
REFERENCE	evm.model.scaffold725_size88532.1	tyrosine-specific transport protein	noEC	E	AT5G19500.1	Tryptophan/tyrosine_permease
REFERENCE	evm.model.scaffold724_size89489.17	oxygen-evolving enhancer protein 3-2, chloroplastic-like	noEC	S	AT4G05180.2	photosystem_II_subunit_Q-2
REFERENCE	evm.model.scaffold721_size90222.13	protein EMBRYO SAC DEVELOPMENT ARREST 3, chloroplastic	EC:1.8.1.8	S	AT2G34860.2	DnaJ/Hsp40_cysteine-rich_domain_superfamily_protein
REFERENCE	evm.model.scaffold720_size90262.11	thioredoxin-like protein AAED1, chloroplastic	EC:1.11.1.15;EC:1.11.1.7	S	AT2G37240.1	Thioredoxin_superfamily_protein
REFERENCE	evm.model.scaffold720_size90262.7	Adenosine kinase	EC:2.7.1.20	G	AT5G03300.1	adenosine_kinase_2
REFERENCE	evm.model.scaffold720_size90262.5	Limonene synthase	EC:4.2.3.20;EC:4.2.3.14;EC:4.2.3.15;EC:4.2.3.106;EC:4.2.3.16	S	AT3G25830.1	terpene_synthase-like_sequence-1%2C8-cineole
REFERENCE	evm.model.scaffold720_size90262.4	(-)-alpha-terpineol synthase	EC:4.2.3.20;EC:4.2.3.14;EC:4.2.3.15;EC:4.2.3.106;EC:4.2.3.16	S	AT4G16730.1	terpene_synthase_02
REFERENCE	evm.model.scaffold720_size90262.3	(-)-alpha-terpineol synthase	EC:4.2.3.20;EC:4.2.3.14;EC:4.2.3.15;EC:4.2.3.106;EC:4.2.3.16	S	AT4G16730.1	terpene_synthase_02
REFERENCE	evm.model.scaffold719_size90700.19	Protein PALE CRESS, chloroplastic	noEC	S	AT2G48120.1	pale_cress_protein_(PAC)
REFERENCE	evm.model.scaffold719_size90700.13	U-box domain-containing protein 35-like	EC:2.7.11	T	AT5G61550.4	U-box_domain-containing_protein_kinase_family_protein
REFERENCE	evm.model.scaffold719_size90700.8	sugar transporter ERD6-like 7	EC:1.3.1.74	U	AT2G48020.2	Major_facilitator_superfamily_protein
REFERENCE	evm.model.scaffold719_size90700.7	probable plastid-lipid-associated protein 6, chloroplastic	noEC	S	AT3G23400.1	Plastid-lipid_associated_protein_PAP_/_fibrillin_family_protein
REFERENCE	evm.model.scaffold718_size90744.14	ATP-dependent 6-phosphofructokinase	EC:2.7.1.11	G	AT5G61580.1	phosphofructokinase_4
REFERENCE	evm.model.scaffold717_size90790.22	Branched-chain-amino-acid aminotransferase	EC:2.6.1.42	E	AT3G49680.2	branched-chain_aminotransferase_3
REFERENCE	evm.model.scaffold717_size90790.14	Endoribonuclease E-like protein	noEC	C	AT4G37920.1	endoribonuclease_E-like_protein
REFERENCE	evm.model.scaffold717_size90790.9	Shikimate kinase	EC:2.7.1.71	F	AT2G21940.4	shikimate_kinase_1
REFERENCE	evm.model.scaffold717_size90790.1	Chaperone protein dnaJ C76, chloroplastic	noEC	O	AT5G23240.1	DNAJ_heat_shock_N-terminal_domain-containing_protein
REFERENCE	evm.model.scaffold714_size91440.22	Xyloglucan endotransglucosylase/hydrolase	EC:2.4.1.207	G	AT5G13870.3	xyloglucan_endotransglucosylase/hydrolase_5
REFERENCE	evm.model.scaffold712_size91892.26	Ribulose bisphosphate carboxylase small chain	EC:4.1.1.39	E	AT5G38430.2	Ribulose_bisphosphate_carboxylase_(small_chain)_family_protein
REFERENCE	evm.model.scaffold712_size91892.24	ATP-dependent Clp protease proteolytic subunit	EC:3.4.21;EC:3.6.1.3;EC:3.6.1.15	O	AT1G66670.1	CLP_protease_proteolytic_subunit_3
REFERENCE	evm.model.scaffold712_size91892.17	Outer envelope pore protein 16-2, chloroplastic	noEC	U	AT4G16160.2	Mitochondrial_import_inner_membrane_translocase_subunit_Tim17/Tim22/Tim23_family_protein
REFERENCE	evm.model.scaffold712_size91892.13	prohibitin-3, mitochondrial	noEC	O	AT5G40770.1	prohibitin_3
REFERENCE	evm.model.scaffold712_size91892.8	Adenylyl-sulfate kinase	EC:2.7.1.25	F	AT2G14750.1	APS_kinase
REFERENCE	evm.model.scaffold712_size91892.5	7-hydroxymethyl chlorophyll a reductase, chloroplastic	EC:1.17.7	C	AT1G04620.1	coenzyme_F420_hydrogenase_family_/_dehydrogenase%2C_beta_subunit_family
REFERENCE	evm.model.scaffold711_size92162.13	Glucose-1-phosphate adenylyltransferase	EC:2.7.7.27	H	AT4G39210.2	Glucose-1-phosphate_adenylyltransferase_family_protein
REFERENCE	evm.model.scaffold711_size92162.5	Chalcone-flavonone isomerase family protein	noEC	S	AT1G53520.1	Chalcone-flavanone_isomerase_family_protein
REFERENCE	evm.model.scaffold711_size92162.4	translation initiation factor IF-2, chloroplastic	EC:3.6.1.15	J	AT1G17220.1	Translation_initiation_factor_2%2C_small_GTP-binding_protein
REFERENCE	evm.model.scaffold710_size92978.13	Spermatogenesis-associated protein 20-like	noEC	O	AT4G03200.1	catalytics
REFERENCE	evm.model.scaffold710_size92978.8	Citrate synthase	EC:2.3.3.1	C	AT2G44350.4	Citrate_synthase_family_protein
REFERENCE	evm.model.scaffold708_size93858.4	cytochrome b5-like	EC:1.6.2.2	C	AT5G53560.1	cytochrome_B5_isoform_E
REFERENCE	evm.model.scaffold707_size94148.16	LL-diaminopimelate aminotransferase, chloroplastic	EC:2.6.1.83	E	AT4G33680.1	Pyridoxal_phosphate_(PLP)-dependent_transferases_superfamily_protein
REFERENCE	evm.model.scaffold706_size94229.2	Putative NAD(P)-binding domain-containing protein	noEC	G	AT4G18810.1	NAD(P)-binding_Rossmann-fold_superfamily_protein
REFERENCE	evm.model.scaffold706_size94229.1	protein CHUP1, chloroplastic	noEC	S	AT4G18570.1	Tetratricopeptide_repeat_(TPR)-like_superfamily_protein
REFERENCE	evm.model.scaffold705_size94633.19	Putative zinc metalloprotease EGY1, chloroplastic	EC:3.4.24	M	AT5G35220.1	Peptidase_M50_family_protein
REFERENCE	evm.model.scaffold705_size94633.12	Structural maintenance of chromosomes protein	noEC	D	AT3G54670.1	Structural_maintenance_of_chromosomes_(SMC)_family_protein
REFERENCE	evm.model.scaffold704_size94736.2	Dihydrolipoyl dehydrogenase 2, chloroplastic	EC:1.8.1.4	C	AT3G16950.1	lipoamide_dehydrogenase_1
REFERENCE	evm.model.scaffold703_size94923.9	Peptidylprolyl isomerase	EC:5.2.1.8	O	AT5G13410.1	FKBP-like_peptidyl-prolyl_cis-trans_isomerase_family_protein
REFERENCE	evm.model.scaffold703_size94923.2	Fad synthetase 2, chloroplastic	EC:2.7.7.2	H	AT5G23330.1	Nucleotidylyl_transferase_superfamily_protein
TEST	evm.model.scaffold700_size95485.9	Imidazole glycerol phosphate synthase hisHF	EC:3.5.1.2	E	AT4G26900.1	HIS_HF
REFERENCE	evm.model.scaffold699_size96700.11	thioredoxin X, chloroplastic	EC:1.8.1.9;EC:1.8.1.8	O	AT1G50320.1	thioredoxin_X
REFERENCE	evm.model.scaffold699_size96700.4	serine/threonine-protein kinase CDL1-like	EC:2.7.11	T	AT1G20650.1	Protein_kinase_superfamily_protein
REFERENCE	evm.model.scaffold698_size97389.20	Protein TIC 62, chloroplastic	noEC	G	AT3G18890.1	NAD(P)-binding_Rossmann-fold_superfamily_protein
REFERENCE	evm.model.scaffold698_size97389.19	4-hydroxy-3-methylbut-2-enyl diphosphate reductase	EC:1.17.1;EC:1.17.1.2;EC:1.17.7.1;EC:1.17.7	IM	AT4G34350.1	4-hydroxy-3-methylbut-2-enyl_diphosphate_reductase
REFERENCE	evm.model.scaffold698_size97389.6	Protein DETOXIFICATION	noEC	V	AT2G21340.1	MATE_efflux_family_protein
REFERENCE	evm.model.scaffold697_size97550.2	6,7-dimethyl-8-ribityllumazine synthase	EC:2.5.1.78	H	AT2G44050.1	6%2C7-dimethyl-8-ribityllumazine_synthase_/_DMRL_synthase_/_lumazine_synthase_/_riboflavin_synthase
REFERENCE	evm.model.scaffold695_size97738.25	40S ribosomal protein S13-like	noEC	J	AT4G00100.1	ribosomal_protein_S13A
REFERENCE	evm.model.scaffold694_size97836.13	Actin-depolymerizing factor 2	noEC	Z	AT5G59880.1	actin_depolymerizing_factor_3
REFERENCE	evm.model.scaffold692_size98101.13	Protein CHUP1, chloroplastic	noEC	none	AT4G18570.1	Tetratricopeptide_repeat_(TPR)-like_superfamily_protein
REFERENCE	evm.model.scaffold690_size98446.24	Riboflavin biosynthesis protein pyrd, chloroplastic	EC:3.5.4.26	F	AT4G20960.1	Cytidine/deoxycytidylate_deaminase_family_protein
REFERENCE	evm.model.scaffold690_size98446.21	thioredoxin-like protein CITRX, chloroplastic	EC:5.3.4.1;EC:1.8.1.9;EC:1.8.1.8	C	AT3G06730.1	Thioredoxin_z
REFERENCE	evm.model.scaffold687_size100329.6	Copal-8-ol diphosphate hydratase	EC:5.5.1.13	S	AT4G02780.1	Terpenoid_cyclases/Protein_prenyltransferases_superfamily_protein
REFERENCE	evm.model.scaffold686_size102709.5	Putative fructokinase-5 isoform B	noEC	S	AT4G10300.1	RmlC-like_cupins_superfamily_protein
REFERENCE	evm.model.scaffold684_size103286.27	Glucose-1-phosphate adenylyltransferase	EC:2.7.7.27	H	AT4G39210.2	Glucose-1-phosphate_adenylyltransferase_family_protein
REFERENCE	evm.model.scaffold684_size103286.18	probable alkaline/neutral invertase B	EC:3.2.1.97;EC:3.2.1.26	S	AT4G34860.3	Plant_neutral_invertase_family_protein
REFERENCE	evm.model.scaffold684_size103286.8	30S ribosomal protein 3, chloroplastic	noEC	J	AT1G68590.1	Ribosomal_protein_PSRP-3/Ycf65
REFERENCE	evm.model.scaffold683_size103566.9	Acyl-[acyl-carrier-protein] desaturase	EC:1.14.19.2;EC:1.14.19	C	AT2G43710.1	Plant_stearoyl-acyl-carrier-protein_desaturase_family_protein
REFERENCE	evm.model.scaffold679_size106169.19	PsbP domain-containing protein 4, chloroplastic	noEC	S	AT1G77090.1	thylakoid_lumenal_protein_(Mog1/PsbP/DUF1795-like_photosystem_II_reaction_center_PsbP_family_protein)
REFERENCE	evm.model.scaffold678_size107199.12	Putative L-ascorbate peroxidase 3	EC:1.11.1.5;EC:1.11.1.7;EC:1.11.1.11	E	AT4G35000.1	ascorbate_peroxidase_3
REFERENCE	evm.model.scaffold677_size107734.25	mitochondrial carnitine/acylcarnitine carrier-like protein	noEC	C	AT5G46800.3	Mitochondrial_substrate_carrier_family_protein
REFERENCE	evm.model.scaffold677_size107734.12	Phosphatidylinositol transfer protein SEC14	noEC	I	AT4G09160.1	SEC14_cytosolic_factor_family_protein_/_phosphoglyceride_transfer_family_protein
REFERENCE	evm.model.scaffold677_size107734.8	Luminal-binding protein 5	EC:1.3.1.74;EC:3.6.1.3;EC:3.6.1.15	O	AT5G42020.1	Heat_shock_protein_70_(Hsp_70)_family_protein
REFERENCE	evm.model.scaffold675_size109163.21	ATP-dependent Clp protease proteolytic subunit	EC:3.4.21;EC:3.6.1.3;EC:3.6.1.15	O	AT1G12410.1	CLP_protease_proteolytic_subunit_2
REFERENCE	evm.model.scaffold675_size109163.14	Psbp-like protein 1, chloroplastic	noEC	O	AT3G55330.1	PsbP-like_protein_1
REFERENCE	evm.model.scaffold672_size109657.23	Starch synthase, chloroplastic/amyloplastic	EC:2.4.1.11	H	AT4G18240.1	starch_synthase_4
REFERENCE	evm.model.scaffold670_size110176.30	Aconitate hydratase	EC:4.2.1.3	C	AT2G05710.1	aconitase_3
REFERENCE	evm.model.scaffold670_size110176.21	Cytochrome b6-f complex iron-sulfur subunit	EC:1.10.9;EC:1.10.2;EC:1.10.9.1;EC:1.10.2.2	C	AT4G03280.1	photosynthetic_electron_transfer_C
REFERENCE	evm.model.scaffold670_size110176.18	UPF0051 protein ABCI8, chloroplastic-like	EC:3.6.1.3;EC:3.6.1.15	O	AT4G04770.1	ATP_binding_cassette_protein_1
REFERENCE	evm.model.scaffold669_size110238.18	DNA-directed RNA polymerase subunit	EC:2.7.7.6	K	AT4G35800.2	RNA_polymerase_II_large_subunit
REFERENCE	evm.model.scaffold669_size110238.1	protein LOW PSII ACCUMULATION 3, chloroplastic isoform X2	noEC	S	AT5G48790.1	LOW_PSII_ACCUMULATION_protein_(DUF1995)
REFERENCE	evm.model.scaffold668_size110816.21	Pentatricopeptide repeat-containing protein	noEC	S	AT1G30290.1	Tetratricopeptide_repeat_(TPR)-like_superfamily_protein
REFERENCE	evm.model.scaffold668_size110816.13	Chlorophyll a-b binding protein, chloroplastic	noEC	C	AT1G29930.1	chlorophyll_A/B_binding_protein_1
REFERENCE	evm.model.scaffold668_size110816.12	Chlorophyll a-b binding protein, chloroplastic	noEC	C	AT1G29930.1	chlorophyll_A/B_binding_protein_1
REFERENCE	evm.model.scaffold668_size110816.9	GDSL esterase/lipase At5g45670-like	EC:3.1.1.1;EC:3.1.1.3	L	AT5G45670.1	GDSL-like_Lipase/Acylhydrolase_superfamily_protein
REFERENCE	evm.model.scaffold667_size110899.25	Pentatricopeptide repeat-containing protein, chloroplastic	noEC	S	AT3G63370.1	Tetratricopeptide_repeat_(TPR)-like_superfamily_protein
REFERENCE	evm.model.scaffold667_size110899.16	Arginine--tRNA ligase	noEC	S	AT4G28590.1	polyadenylate-binding_protein_2-binding_protein
REFERENCE	evm.model.scaffold666_size111503.11	probable inactive ATP-dependent zinc metalloprotease FTSHI 1, chloroplastic	EC:3.4.24;EC:3.6.1.3;EC:3.6.3.52;EC:7.4.2.5;EC:3.6.1.15	O	AT4G23940.1	FtsH_extracellular_protease_family
REFERENCE	evm.model.scaffold666_size111503.4	Pentatricopeptide repeat-containing protein	noEC	S	AT3G46870.1	Pentatricopeptide_repeat_(PPR)_superfamily_protein
REFERENCE	evm.model.scaffold666_size111503.3	Aminomethyltransferase	EC:2.1.2.10;EC:1.17.1.8	E	AT1G11860.3	Glycine_cleavage_T-protein_family
REFERENCE	evm.model.scaffold665_size111511.6	psbP domain-containing protein 4, chloroplastic	noEC	S	AT1G77090.1	thylakoid_lumenal_protein_(Mog1/PsbP/DUF1795-like_photosystem_II_reaction_center_PsbP_family_protein)
REFERENCE	evm.model.scaffold664_size111833.7	Molecular chaperone (HSP90 family)	noEC	O	AT2G04030.1	Chaperone_protein_htpG_family_protein
REFERENCE	evm.model.scaffold660_size113795.21	Delta-1-pyrroline-5-carboxylate synthase	EC:1.2.1.41;EC:2.7.2.11	E	AT3G55610.1	delta_1-pyrroline-5-carboxylate_synthase_2
REFERENCE	evm.model.scaffold657_size115252.23	probable WRKY transcription factor 41	noEC	K	AT4G11070.1	WRKY_family_transcription_factor
REFERENCE	evm.model.scaffold657_size115252.22	putative PAP-specific phosphatase, mitochondrial	EC:3.1.3.7;EC:3.1.3.57;EC:3.1.3.31	FP	AT4G05090.1	Inositol_monophosphatase_family_protein
REFERENCE	evm.model.scaffold655_size115805.27	Ferritin	EC:1.16.3.1;EC:1.16.3	P	AT5G01600.1	ferretin_1
REFERENCE	evm.model.scaffold655_size115805.12	probable envelope ADP,ATP carrier protein, chloroplastic	noEC	C	AT3G51870.1	Mitochondrial_substrate_carrier_family_protein
TEST	evm.model.scaffold655_size115805.10	Protein FLUORESCENT IN BLUE LIGHT, chloroplastic	noEC	S	AT3G14110.2	Tetratricopeptide_repeat_(TPR)-like_superfamily_protein
REFERENCE	evm.model.scaffold655_size115805.5	Lipoyl synthase, chloroplastic	EC:2.8.1.8	H	AT5G08415.1	Radical_SAM_superfamily_protein
REFERENCE	evm.model.scaffold655_size115805.4	Lipoyl synthase, chloroplastic	EC:2.8.1.8	H	noTAIR	NULL
REFERENCE	evm.model.scaffold655_size115805.3	Lipoyl synthase, chloroplastic	EC:2.8.1.8	H	AT5G08415.1	Radical_SAM_superfamily_protein
REFERENCE	evm.model.scaffold654_size116285.18	Chlorophyll a-b binding protein, chloroplastic	noEC	C	AT4G10340.1	light_harvesting_complex_of_photosystem_II_5
REFERENCE	evm.model.scaffold653_size116565.23	Kinesin-like protein kca2	EC:3.6.1.3;EC:3.6.4.5;EC:3.6.1.15	Z	AT5G10470.1	kinesin_like_protein_for_actin_based_chloroplast_movement_1
REFERENCE	evm.model.scaffold651_size116853.23	Aspartate aminotransferase	EC:2.6.1.78;EC:2.6.1.79;EC:2.6.1.1	DKLT	AT4G31990.2	aspartate_aminotransferase_5
REFERENCE	evm.model.scaffold651_size116853.15	3-ketoacyl-CoA thiolase 2, peroxisomal	EC:2.3.1.16	I	AT2G33150.1	peroxisomal_3-ketoacyl-CoA_thiolase_3
REFERENCE	evm.model.scaffold651_size116853.7	Glutamyl-tRNA(Gln) amidotransferase subunit B, chloroplastic/mitochondrial	EC:6.3.5.7	J	AT1G48520.1	GLU-ADT_subunit_B
REFERENCE	evm.model.scaffold650_size116903.40	Cysteine synthase	EC:2.5.1.47	E	AT4G14880.5	O-acetylserine_(thiol)_lyase_(OAS-TL)_isoform_A1
REFERENCE	evm.model.scaffold650_size116903.14	Putative lipase/lipooxygenase, PLAT/LH2 family protein	noEC	S	AT4G39730.1	Lipase/lipooxygenase%2C_PLAT/LH2_family_protein
REFERENCE	evm.model.scaffold650_size116903.12	Mitochondrial carrier protein	noEC	C	AT5G64970.1	Mitochondrial_substrate_carrier_family_protein
REFERENCE	evm.model.scaffold650_size116903.6	4-alpha-glucanotransferase	EC:2.4.1.25	G	AT5G64860.1	disproportionating_enzyme
REFERENCE	evm.model.scaffold650_size116903.3	Fructose-bisphosphate aldolase	EC:4.1.2.13	G	AT4G38970.1	fructose-bisphosphate_aldolase_2
REFERENCE	evm.model.scaffold648_size118734.16	Dehydroascorbate reductase	EC:2.5.1.18;EC:1.8.5.1	P	AT5G16710.1	dehydroascorbate_reductase_1
REFERENCE	evm.model.scaffold648_size118734.9	Ribosomal protein L9	noEC	J	AT3G44890.1	ribosomal_protein_L9
REFERENCE	evm.model.scaffold647_size119004.23	Cysteine-rich repeat secretory protein 3	noEC	S	AT1G04520.1	plasmodesmata-located_protein_2
REFERENCE	evm.model.scaffold647_size119004.13	Glycine--tRNA ligase 2, chloroplastic/mitochondrial (Fragment)	EC:6.1.1.14	J	AT3G48110.1	glycine-tRNA_ligase
REFERENCE	evm.model.scaffold647_size119004.12	Glycine--tRNA ligase 2, chloroplastic/mitochondrial	EC:6.1.1.14	J	AT3G48110.1	glycine-tRNA_ligase
REFERENCE	evm.model.scaffold645_size119521.35	FAD-dependent urate hydroxylase-like	noEC	C	AT2G35660.1	FAD/NAD(P)-binding_oxidoreductase_family_protein
REFERENCE	evm.model.scaffold643_size120596.12	transcription factor GTE8	noEC	K	AT3G01770.1	bromodomain_and_extraterminal_domain_protein_10
REFERENCE	evm.model.scaffold643_size120596.3	3-isopropylmalate dehydrogenase	EC:1.1.1.85	E	AT1G31180.1	isopropylmalate_dehydrogenase_3
REFERENCE	evm.model.scaffold642_size121732.23	Calreticulin	noEC	O	AT1G56340.2	calreticulin_1a
REFERENCE	evm.model.scaffold641_size121784.18	probable NADH dehydrogenase [ubiquinone] 1 alpha subcomplex subunit 5, mitochondrial	EC:7.1.1.2;EC:1.6.99.5;EC:1.6.99.3	C	AT5G52840.1	NADH-ubiquinone_oxidoreductase-like_protein
REFERENCE	evm.model.scaffold641_size121784.16	Anthranilate synthase component I	EC:4.1.3.27	E	AT2G29690.1	anthranilate_synthase_2
REFERENCE	evm.model.scaffold641_size121784.6	Vesicle-associated membrane protein 721	noEC	U	AT2G33120.2	synaptobrevin-related_protein_1
REFERENCE	evm.model.scaffold639_size122514.17	translocator protein homolog	noEC	S	AT2G47770.1	TSPO(outer_membrane_tryptophan-rich_sensory_protein)-like_protein
REFERENCE	evm.model.scaffold639_size122514.13	Peptide chain release factor APG3, chloroplastic	noEC	J	AT3G62910.1	Peptide_chain_release_factor_1
REFERENCE	evm.model.scaffold639_size122514.8	probable plastid-lipid-associated protein 6, chloroplastic	noEC	S	AT3G23400.1	Plastid-lipid_associated_protein_PAP_/_fibrillin_family_protein
REFERENCE	evm.model.scaffold639_size122514.6	U-box domain-containing protein 35-like	noEC	T	AT4G25160.1	U-box_domain-containing_protein_kinase_family_protein
REFERENCE	evm.model.scaffold637_size123618.31	Fructokinase-like 2, chloroplastic	noEC	G	AT1G69200.1	fructokinase-like_protein
TEST	evm.model.scaffold637_size123618.24	Metallo-hydrolase/oxidoreductase superfamily protein	noEC	S	AT1G29700.2	Metallo-hydrolase/oxidoreductase_superfamily_protein
REFERENCE	evm.model.scaffold637_size123618.12	Peptidyl-tRNA hydrolase	EC:3.1.1.29;EC:3.1.1.1	J	AT1G18440.1	Peptidyl-tRNA_hydrolase_family_protein
REFERENCE	evm.model.scaffold636_size123790.5	aminodeoxychorismate synthase, chloroplastic isoform X1	EC:2.6.1.85	J	AT2G28880.1	para-aminobenzoate_(PABA)_synthase_family_protein
REFERENCE	evm.model.scaffold635_size123795.33	Chlorophyll a-b binding protein, chloroplastic	noEC	C	AT5G54270.1	light-harvesting_chlorophyll_B-binding_protein_3
REFERENCE	evm.model.scaffold635_size123795.4	Probable alanine--tRNA ligase, chloroplastic	EC:6.1.1.7;EC:3.1.1.1	J	AT5G22800.1	Alanyl-tRNA_synthetase%2C_class_IIc
REFERENCE	evm.model.scaffold633_size124080.16	Protein CHUP1, chloroplastic	noEC	S	AT3G25690.6	Hydroxyproline-rich_glycoprotein_family_protein
REFERENCE	evm.model.scaffold633_size124080.4	Glutamine synthetase	EC:6.3.1.2	E	AT5G37600.1	hypothetical_protein
REFERENCE	evm.model.scaffold632_size124595.30	Lipase/lipooxygenase, PLAT/LH2	EC:1.11.1.7;EC:1.11.1.6	S	AT4G39730.1	Lipase/lipooxygenase%2C_PLAT/LH2_family_protein
REFERENCE	evm.model.scaffold632_size124595.1	4-diphosphocytidyl-2-C-methyl-D-erythritol kinase	EC:2.7.1.148	H	AT2G26930.1	4-(cytidine_5-phospho)-2-C-methyl-D-erithritol_kinase
REFERENCE	evm.model.scaffold631_size125893.18	zinc protease PQQL-like	EC:3.4.24	O	AT5G56730.1	Insulinase_(Peptidase_family_M16)_protein
REFERENCE	evm.model.scaffold627_size127100.29	zinc finger protein VAR3, chloroplastic	noEC	S	AT5G17790.1	zinc_finger_(Ran-binding)_family_protein
REFERENCE	evm.model.scaffold627_size127100.22	Arogenate dehydrogenase 2, chloroplastic-like	EC:1.3.1.12;EC:1.3.1.13	E	AT1G15710.1	prephenate_dehydrogenase_family_protein
REFERENCE	evm.model.scaffold627_size127100.4	rRNA methyltransferase 1, mitochondrial-like	noEC	A	AT2G19870.1	tRNA/rRNA_methyltransferase_(SpoU)_family_protein
REFERENCE	evm.model.scaffold625_size127502.33	Monodehydroascorbate reductase	EC:1.6.5.4	S	AT1G63940.2	monodehydroascorbate_reductase_6
REFERENCE	evm.model.scaffold624_size127768.36	rhodanese-like domain-containing protein 4, chloroplastic	EC:3.2.1.14	S	AT4G01050.1	thylakoid_rhodanese-like_protein
REFERENCE	evm.model.scaffold624_size127768.33	ascorbate transporter, chloroplastic-like	noEC	G	AT4G00370.1	Major_facilitator_superfamily_protein
REFERENCE	evm.model.scaffold624_size127768.27	Carotenoid isomerase	noEC	H	AT1G06820.1	carotenoid_isomerase
REFERENCE	evm.model.scaffold624_size127768.22	Iron-sulfur cluster biosynthesis family protein (Fragment)	noEC	CU	AT5G03900.2	Iron-sulfur_cluster_biosynthesis_family_protein
REFERENCE	evm.model.scaffold624_size127768.21	Peroxiredoxin	EC:1.11.1.15;EC:1.11.1.7	O	AT3G52960.1	Thioredoxin_superfamily_protein
REFERENCE	evm.model.scaffold624_size127768.19	Peroxiredoxin	EC:1.11.1.15;EC:1.11.1.7	O	AT3G52960.1	Thioredoxin_superfamily_protein
REFERENCE	evm.model.scaffold624_size127768.1	Mitochondrial ubiquitin ligase activator of nfkb 1	noEC	O	AT1G54150.1	E3_Ubiquitin_ligase_family_protein
REFERENCE	evm.model.scaffold623_size127870.14	Mitogen-activated protein kinase kinase	EC:2.7.11;EC:2.7.12.1	T	AT1G51660.1	mitogen-activated_protein_kinase_kinase_4
REFERENCE	evm.model.scaffold623_size127870.2	Peroxiredoxin	EC:1.11.1.15;EC:1.11.1.7	O	AT3G52960.1	Thioredoxin_superfamily_protein
REFERENCE	evm.model.scaffold623_size127870.1	Protein microrchidia 6	EC:3.6.1.3;EC:3.6.1.15	D	AT1G19100.1	Histidine_kinase-%2C_DNA_gyrase_B-%2C_and_HSP90-like_ATPase_family_protein
REFERENCE	evm.model.scaffold622_size128123.18	60S ribosomal protein like	noEC	J	AT3G49910.1	Translation_protein_SH3-like_family_protein
REFERENCE	evm.model.scaffold622_size128123.15	GTP-binding protein OBGC, chloroplastic	EC:3.6.1.15	J	AT5G18570.1	GTP1/OBG_family_protein
REFERENCE	evm.model.scaffold621_size128310.30	Heat-shock protein, putative	noEC	O	AT1G53540.1	HSP20-like_chaperones_superfamily_protein
REFERENCE	evm.model.scaffold621_size128310.23	chloroplast processing peptidase-like isoform X1	EC:3.4.21	O	AT3G24590.1	plastidic_type_i_signal_peptidase_1
REFERENCE	evm.model.scaffold621_size128310.13	thioredoxin Y1, chloroplastic-like	EC:1.8.1.9;EC:1.8.1.8	O	AT1G76760.1	thioredoxin_Y1
REFERENCE	evm.model.scaffold621_size128310.10	thioredoxin-like protein CDSP32, chloroplastic	EC:1.6.5.4;EC:1.8.1.9;EC:1.8.1.8	O	AT1G76080.1	chloroplastic_drought-induced_stress_protein_of_32_kD
REFERENCE	evm.model.scaffold620_size128314.28	Alpha-1,4 glucan phosphorylase	EC:2.4.1.1	G	AT3G29320.1	Glycosyl_transferase%2C_family_35
REFERENCE	evm.model.scaffold620_size128314.27	Alpha-1,4 glucan phosphorylase	EC:2.4.1.1	G	AT3G29320.1	Glycosyl_transferase%2C_family_35
REFERENCE	evm.model.scaffold620_size128314.9	Ribosomal protein L18/L5	noEC	O	AT1G14205.1	Ribosomal_L18p/L5e_family_protein
REFERENCE	evm.model.scaffold619_size128345.20	Nuclear-pore anchor	noEC	S	AT1G79280.1	nuclear_pore_anchor
REFERENCE	evm.model.scaffold616_size128914.17	Glutamate--cysteine ligase, chloroplastic	EC:6.3.2.2	H	AT4G23100.3	glutamate-cysteine_ligase
REFERENCE	evm.model.scaffold616_size128914.13	Early nodulin-like protein	noEC	S	AT1G79800.1	early_nodulin-like_protein_7
REFERENCE	evm.model.scaffold616_size128914.11	Early nodulin-like protein	noEC	S	AT1G79800.1	early_nodulin-like_protein_7
REFERENCE	evm.model.scaffold615_size129786.35	Pentatricopeptide repeat-containing protein	noEC	S	AT3G46870.1	Pentatricopeptide_repeat_(PPR)_superfamily_protein
REFERENCE	evm.model.scaffold615_size129786.34	Aminomethyltransferase	EC:2.1.2.10;EC:1.17.1.8	E	AT1G11860.2	Glycine_cleavage_T-protein_family
REFERENCE	evm.model.scaffold614_size131169.30	Acetylornithine aminotransferase, mitochondrial-like	EC:2.7.11;EC:2.6.1.11	E	AT1G80600.1	HOPW1-1-interacting_1
REFERENCE	evm.model.scaffold612_size132011.1	mitochondrial substrate carrier family protein C	noEC	C	AT2G35800.1	mitochondrial_substrate_carrier_family_protein
REFERENCE	evm.model.scaffold611_size132032.11	Psbp domain-containing protein 1, chloroplastic	noEC	S	AT4G15510.1	Photosystem_II_reaction_center_PsbP_family_protein
REFERENCE	evm.model.scaffold611_size132032.7	Carbonic anhydrase	EC:4.2.1.1	P	AT5G14740.9	carbonic_anhydrase_2
REFERENCE	evm.model.scaffold611_size132032.4	ATP sulfurylase 2-like	EC:2.7.7.4;EC:2.7.1.25	P	AT1G19920.1	Pseudouridine_synthase/archaeosine_transglycosylase-like_family_protein
REFERENCE	evm.model.scaffold609_size132898.20	Threonine--tRNA ligase	EC:6.1.1.3	J	AT2G04842.2	threonyl-tRNA_synthetase%2C_putative_/_threonine-tRNA_ligase
REFERENCE	evm.model.scaffold609_size132898.19	heat shock protein 90-6, mitochondrial-like	noEC	O	AT3G07770.3	HEAT_SHOCK_PROTEIN_89.1
REFERENCE	evm.model.scaffold606_size133267.8	pyrophosphate-energized vacuolar membrane proton pump	EC:7.1.3.1;EC:3.6.1.1	C	AT1G15690.1	Inorganic_H_pyrophosphatase_family_protein
REFERENCE	evm.model.scaffold604_size133642.3	D-cysteine desulfhydrase	EC:3.5.99.7;EC:4.4.1.15	E	AT1G48420.3	D-cysteine_desulfhydrase
REFERENCE	evm.model.scaffold603_size133874.14	probable inactive ATP-dependent zinc metalloprotease FTSHI 5, chloroplastic isoform X1	EC:3.4.24;EC:3.6.1.3;EC:3.6.3.52;EC:7.4.2.5;EC:3.6.1.15	O	AT3G04340.1	FtsH_extracellular_protease_family
REFERENCE	evm.model.scaffold602_size134299.12	40S ribosomal protein S3a	noEC	J	AT3G04840.1	Ribosomal_protein_S3Ae
REFERENCE	evm.model.scaffold602_size134299.11	Peptide deformylase	EC:3.5.1.88	J	AT5G14660.3	peptide_deformylase_1B
REFERENCE	evm.model.scaffold601_size134591.19	Putative cadmium/zinc-transporting ATPase HMA1, chloroplastic	EC:3.6.1.3;EC:7.2.2.2;EC:7.2.2.10;EC:3.6.3.3;EC:3.6.1.15	P	AT4G37270.1	heavy_metal_atpase_1
REFERENCE	evm.model.scaffold600_size134883.19	Tryptophan synthase	EC:4.2.1.20	E	AT4G27070.1	tryptophan_synthase_beta-subunit_2
REFERENCE	evm.model.scaffold599_size134888.16	sulfate transporter 3.1	noEC	P	AT3G51895.1	sulfate_transporter_3%3B1
REFERENCE	evm.model.scaffold599_size134888.13	37 kDa inner envelope membrane protein, chloroplastic	EC:2.1.1.295	H	AT3G63410.1	S-adenosyl-L-methionine-dependent_methyltransferases_superfamily_protein
REFERENCE	evm.model.scaffold599_size134888.12	beta-carotene isomerase D27, chloroplastic-like	noEC	S	AT1G03055.1	beta-carotene_isomerase_D27-like_protein
REFERENCE	evm.model.scaffold596_size138122.29	Phosphatidylinositol 4-phosphate 5-kinase MSS4-like protein	noEC	S	AT1G29195.1	phosphatidylinositol_4-phosphate_5-kinase_MSS4-like_protein
REFERENCE	evm.model.scaffold595_size138481.11	Isocitrate dehydrogenase [NADP]	EC:1.1.1.42	C	AT5G14590.1	Isocitrate/isopropylmalate_dehydrogenase_family_protein
REFERENCE	evm.model.scaffold595_size138481.8	peptidyl-prolyl cis-trans isomerase CYP38, chloroplastic	EC:3.1.30;EC:5.2.1.8;EC:3.1.26;EC:3.1.26.4	O	AT3G01480.1	cyclophilin_38
REFERENCE	evm.model.scaffold595_size138481.2	inactive LRR receptor-like serine/threonine-protein kinase BIR2	EC:2.7.11	T	AT3G28450.1	Leucine-rich_repeat_protein_kinase_family_protein
TEST	evm.model.scaffold594_size138683.5	psbP domain-containing protein 5, chloroplastic	noEC	S	AT5G11450.2	PsbP_domain_protein_(Mog1/PsbP/DUF1795-like_photosystem_II_reaction_center_PsbP_family_protein)
REFERENCE	evm.model.scaffold594_size138683.4	N6-adenosine-methyltransferase MT-A70-like	EC:2.1.1.62	A	AT4G10760.1	mRNAadenosine_methylase
REFERENCE	evm.model.scaffold592_size138862.27	Putative cadmium/zinc-transporting ATPase HMA1, chloroplastic	EC:3.6.1.3;EC:7.2.2.2;EC:3.6.3.3;EC:3.6.1.15	P	AT4G37270.1	heavy_metal_atpase_1
REFERENCE	evm.model.scaffold591_size139029.4	Pentatricopeptide repeat-containing protein	noEC	S	AT3G63370.1	Tetratricopeptide_repeat_(TPR)-like_superfamily_protein
REFERENCE	evm.model.scaffold588_size139614.29	serine/threonine-protein kinase TOUSLED-like	EC:2.7.11	T	AT5G20930.1	Protein_kinase_superfamily_protein
REFERENCE	evm.model.scaffold588_size139614.23	high-light-induced protein, chloroplastic	noEC	S	AT5G02120.1	one_helix_protein
REFERENCE	evm.model.scaffold588_size139614.18	Protein plastid transcriptionally active 16, chloroplastic	noEC	G	AT3G46780.1	plastid_transcriptionally_active_16
REFERENCE	evm.model.scaffold588_size139614.7	inner membrane protein PPF-1, chloroplastic	noEC	OU	AT2G28800.1	63_kDa_inner_membrane_family_protein
REFERENCE	evm.model.scaffold587_size140297.5	thioredoxin-like 3-1, chloroplastic	EC:1.8.1.9;EC:1.8.1.8	O	AT5G06690.1	WCRKC_thioredoxin_1
REFERENCE	evm.model.scaffold587_size140297.4	Malic enzyme	EC:1.1.1.38;EC:1.1.1.39;EC:1.1.1.40	C	AT5G25880.1	NADP-malic_enzyme_3
REFERENCE	evm.model.scaffold586_size141285.13	Glucose-6-phosphate isomerase	EC:5.3.1.9	G	AT4G24620.1	phosphoglucose_isomerase_1
REFERENCE	evm.model.scaffold586_size141285.9	F-BAR domain only protein	noEC	D	AT5G57460.1	muniscin_carboxy-terminal_mu-like_domain_protein
REFERENCE	evm.model.scaffold586_size141285.5	Glutamyl-tRNA reductase	EC:1.2.1.70	H	AT1G58290.1	Glutamyl-tRNA_reductase_family_protein
REFERENCE	evm.model.scaffold585_size141312.29	translocase of chloroplast 120, chloroplastic	noEC	S	AT2G16640.3	multimeric_translocon_complex_in_the_outer_envelope_membrane_132
REFERENCE	evm.model.scaffold585_size141312.10	Porphobilinogen deaminase, chloroplastic-like	EC:2.5.1.61	H	AT5G08280.1	hydroxymethylbilane_synthase
REFERENCE	evm.model.scaffold583_size141823.14	thioredoxin X, chloroplastic-like	EC:1.8.1.9;EC:1.8.1.8	O	AT1G50320.1	thioredoxin_X
REFERENCE	evm.model.scaffold583_size141823.13	thioredoxin X, chloroplastic	EC:1.8.1.9;EC:1.8.1.8	O	AT1G50320.1	thioredoxin_X
REFERENCE	evm.model.scaffold583_size141823.4	serine/threonine-protein kinase CDL1-like	EC:2.7.11	T	AT1G20650.1	Protein_kinase_superfamily_protein
REFERENCE	evm.model.scaffold581_size142983.32	probable transcriptional regulatory protein At2g25830	noEC	K	AT2G25830.1	YebC-like_protein
REFERENCE	evm.model.scaffold580_size143028.18	2-C-methyl-D-erythritol 4-phosphate cytidylyltransferase	EC:2.7.7.60	I	AT2G02500.2	Nucleotide-diphospho-sugar_transferases_superfamily_protein
REFERENCE	evm.model.scaffold579_size144847.28	Isocitrate dehydrogenase [NADP]	EC:1.1.1.42	C	AT1G65930.1	cytosolic_NADP+-dependent_isocitrate_dehydrogenase
REFERENCE	evm.model.scaffold579_size144847.16	Phospho-2-dehydro-3-deoxyheptonate aldolase	EC:2.5.1.54	E	AT4G39980.1	3-deoxy-D-arabino-heptulosonate_7-phosphate_synthase_1
REFERENCE	evm.model.scaffold579_size144847.13	Pyridoxal reductase, chloroplastic	EC:1.1.1.65	C	AT5G53580.1	NAD(P)-linked_oxidoreductase_superfamily_protein
REFERENCE	evm.model.scaffold578_size145013.23	glycine--tRNA ligase, chloroplastic/mitochondrial 2-like isoform X1	EC:6.1.1.14	J	AT3G48110.1	glycine-tRNA_ligase
REFERENCE	evm.model.scaffold578_size145013.22	Glycine-tRNA ligase	EC:6.1.1.14	J	noTAIR	NULL
REFERENCE	evm.model.scaffold578_size145013.17	Glycine--tRNA ligase	EC:6.1.1.14;EC:6.1.1.19	J	AT3G48110.1	glycine-tRNA_ligase
REFERENCE	evm.model.scaffold578_size145013.16	Glycyl-tRNA synthetase alpha chain/beta chain	EC:6.1.1.14;EC:6.1.1.19	J	AT3G48110.1	glycine-tRNA_ligase
REFERENCE	evm.model.scaffold576_size146812.2	Heme-binding-like protein, chloroplastic	noEC	S	AT3G10130.1	SOUL_heme-binding_family_protein
REFERENCE	evm.model.scaffold574_size148320.22	Uncharacterized protein	noEC	S	AT4G13200.1	hypothetical_protein
TEST	evm.model.scaffold574_size148320.15	Formate--tetrahydrofolate ligase	EC:6.3.4.3;EC:3.5.4.9;EC:1.5.1.5	J	AT1G50480.1	10-formyltetrahydrofolate_synthetase
REFERENCE	evm.model.scaffold574_size148320.12	protein LOW PSII ACCUMULATION 1, chloroplastic	noEC	S	AT4G28740.1	LOW_PSII_ACCUMULATION-like_protein
TEST	evm.model.scaffold574_size148320.10	Photosystem II reaction center Psb28 protein	noEC	S	AT4G28660.1	photosystem_II_reaction_center_PSB28_protein
REFERENCE	evm.model.scaffold574_size148320.6	Polyribonucleotide nucleotidyltransferase 2, mitochondrial	EC:3.1.13;EC:3.1.15;EC:2.7.7.8	J	AT5G14580.1	polyribonucleotide_nucleotidyltransferase
REFERENCE	evm.model.scaffold574_size148320.3	50s ribosomal protein l12, chloroplastic	noEC	J	AT3G27850.1	ribosomal_protein_L12-C
TEST	evm.model.scaffold573_size148756.21	50S ribosomal protein 6, chloroplastic	noEC	J	AT5G17870.2	plastid-specific_50S_ribosomal_protein_6
REFERENCE	evm.model.scaffold572_size148818.8	fruit protein pKIWI502-like	EC:1.18.1;EC:1.18.1.2	CH	AT1G15140.1	FAD/NAD(P)-binding_oxidoreductase
REFERENCE	evm.model.scaffold572_size148818.6	2-cys peroxiredoxin bas1, chloroplastic	EC:1.11.1;EC:1.11.1.15;EC:1.11.1.7	O	AT5G06290.1	2-cysteine_peroxiredoxin_B
REFERENCE	evm.model.scaffold572_size148818.5	2-Cys peroxiredoxin BAS1, chloroplastic	EC:1.11.1;EC:1.11.1.15;EC:1.11.1.7	O	AT5G06290.2	2-cysteine_peroxiredoxin_B
REFERENCE	evm.model.scaffold569_size149915.20	Asparagine--tRNA ligase, cytoplasmic 1-like	EC:6.1.1.22	J	AT5G56680.1	Class_II_aminoacyl-tRNA_and_biotin_synthetases_superfamily_protein
REFERENCE	evm.model.scaffold569_size149915.16	40S ribosomal protein S10-1-like	noEC	J	AT4G25740.1	RNA_binding_Plectin/S10_domain-containing_protein
REFERENCE	evm.model.scaffold569_size149915.15	AAA+-type ATPase containing the peptidase M41 domain	EC:3.4.24;EC:3.6.1.3;EC:3.6.1.15	O	AT5G58870.1	FTSH_protease_9
REFERENCE	evm.model.scaffold567_size152524.18	Aspartic proteinase NANA, chloroplast	EC:3.4.23	O	AT3G12700.1	Eukaryotic_aspartyl_protease_family_protein
REFERENCE	evm.model.scaffold567_size152524.15	ATP-dependent zinc metalloprotease	EC:3.4.24	none	AT1G56180.1	ATP-dependent_zinc_metalloprotease
REFERENCE	evm.model.scaffold567_size152524.11	DNA repair protein recA homolog 1, chloroplastic-like isoform X1	EC:3.6.1.3;EC:3.6.1.8;EC:3.6.1.19;EC:3.6.1.15	L	AT1G79050.1	recA_DNA_recombination_family_protein
REFERENCE	evm.model.scaffold566_size152642.32	7-hydroxymethyl chlorophyll a reductase, chloroplastic	EC:1.17.7	C	AT1G04620.1	coenzyme_F420_hydrogenase_family_/_dehydrogenase%2C_beta_subunit_family
TEST	evm.model.scaffold566_size152642.27	probable N-acetyl-gamma-glutamyl-phosphate reductase, chloroplastic	EC:1.2.1.38;EC:3.6.1.15	E	AT2G19940.2	Putative_N-acetyl-gamma-glutamyl-phosphate_reductase
REFERENCE	evm.model.scaffold566_size152642.21	Putative receptor-like protein kinase	EC:2.7.11	T	AT2G21480.1	Malectin/receptor-like_protein_kinase_family_protein
REFERENCE	evm.model.scaffold566_size152642.20	Putative receptor-like protein kinase	noEC	T	AT2G21480.1	Malectin/receptor-like_protein_kinase_family_protein
REFERENCE	evm.model.scaffold565_size154525.26	20 kDa chaperonin, chloroplastic	noEC	O	AT5G20720.4	chaperonin_20
REFERENCE	evm.model.scaffold565_size154525.10	ATP synthase subunit O, mitochondrial	noEC	C	AT5G13450.1	delta_subunit_of_Mt_ATP_synthase
REFERENCE	evm.model.scaffold565_size154525.9	50s ribosomal protein l18, chloroplastic	noEC	J	AT1G48350.1	Ribosomal_L18p/L5e_family_protein
REFERENCE	evm.model.scaffold564_size154702.30	Molybdenum cofactor biosynthesis protein 1	noEC	H	AT2G31955.5	cofactor_of_nitrate_reductase_and_xanthine_dehydrogenase_2
REFERENCE	evm.model.scaffold563_size154924.18	Protein IQ-DOMAIN 32	noEC	S	AT1G19870.2	IQ-domain_32
REFERENCE	evm.model.scaffold562_size155008.30	DNA-damage-repair/toleration protein DRT100-like	EC:1.3.1.74;EC:3.2.1.15	S	AT3G20820.1	Leucine-rich_repeat_(LRR)_family_protein
REFERENCE	evm.model.scaffold561_size156615.29	guanylate kinase 2, chloroplastic/mitochondrial-like	EC:2.7.4.4;EC:3.1.30;EC:2.7.4.8;EC:3.1.26;EC:3.1.26.4	F	AT3G06200.1	P-loop_containing_nucleoside_triphosphate_hydrolases_superfamily_protein
REFERENCE	evm.model.scaffold560_size156814.27	outer envelope pore protein 37, chloroplastic	noEC	S	AT2G43950.2	chloroplast_outer_envelope_protein_37
REFERENCE	evm.model.scaffold558_size158525.55	protein high chlorophyll fluorescent 107-like	noEC	S	AT3G17040.1	high_chlorophyll_fluorescent_107
REFERENCE	evm.model.scaffold558_size158525.32	Putative 5-AMP-activated kinase-like protein	noEC	G	AT5G39790.3	PROTEIN_TARGETING_TO_STARCH_(PTST)
TEST	evm.model.scaffold558_size158525.23	protein ABA DEFICIENT 4, chloroplastic	noEC	S	AT1G67080.1	abscisic_acid_(aba)-deficient_4
REFERENCE	evm.model.scaffold557_size158656.15	Phospho-2-dehydro-3-deoxyheptonate aldolase	EC:2.5.1.54	E	AT1G22410.1	Class-II_DAHP_synthetase_family_protein
REFERENCE	evm.model.scaffold555_size160189.2	Pentatricopeptide repeat-containing protein	EC:3.6.1.3;EC:3.6.1.15	S	AT2G41720.3	Tetratricopeptide_repeat_(TPR)-like_superfamily_protein
REFERENCE	evm.model.scaffold555_size160189.1	magnesium-chelatase subunit ChlH, chloroplastic	EC:6.6.1.1	H	AT5G13630.1	magnesium-chelatase_subunit_chlH%2C_chloroplast%2C_putative_/_Mg-protoporphyrin_IX_chelatase%2C_putative_(CHLH)
TEST	evm.model.scaffold554_size161974.32	probable plastid-lipid-associated protein 12, chloroplastic	noEC	S	AT1G51110.1	Plastid-lipid_associated_protein_PAP_/_fibrillin_family_protein
REFERENCE	evm.model.scaffold553_size162348.18	18.5 kDa class I heat shock protein	noEC	O	AT1G53540.1	HSP20-like_chaperones_superfamily_protein
REFERENCE	evm.model.scaffold553_size162348.4	Actin-1	noEC	Z	AT3G12110.1	actin-11
REFERENCE	evm.model.scaffold552_size162563.34	Histone H4	noEC	B	AT5G59970.2	Histone_superfamily_protein
REFERENCE	evm.model.scaffold551_size162907.23	Malate dehydrogenase, chloroplastic	EC:1.6.1.1;EC:1.1.1.37	C	AT3G47520.1	malate_dehydrogenase
REFERENCE	evm.model.scaffold551_size162907.12	Lipoxygenase	EC:1.13.11;EC:1.13.11.12	E	AT3G45140.1	lipoxygenase_2
REFERENCE	evm.model.scaffold551_size162907.6	Photosystem i reaction center subunit iv b, chloroplastic	noEC	S	AT2G20260.1	photosystem_I_subunit_E-2
REFERENCE	evm.model.scaffold551_size162907.5	Glutaredoxin-C5, chloroplastic	EC:1.8.1.7;EC:1.8.1.9	O	AT2G20270.1	Thioredoxin_superfamily_protein
REFERENCE	evm.model.scaffold550_size162924.34	E3 ubiquitin-protein ligase KEG-like	EC:2.7.11	T	AT4G32250.3	Protein_kinase_superfamily_protein
REFERENCE	evm.model.scaffold549_size164026.25	Ferredoxin--nitrite reductase, chloroplastic	EC:1.7.2.1;EC:1.7.7.1	P	AT2G15620.1	nitrite_reductase_1
REFERENCE	evm.model.scaffold549_size164026.24	Nitrite reductase	EC:1.7.2.1;EC:1.7.7.1	P	AT2G15620.1	nitrite_reductase_1
REFERENCE	evm.model.scaffold549_size164026.19	Multicopy suppressor of Ira1	noEC	B	AT5G58230.1	Transducin/WD40_repeat-like_superfamily_protein
REFERENCE	evm.model.scaffold546_size167141.17	Transcription factor, TCP	noEC	K	AT5G08070.2	TCP_domain_protein_17
REFERENCE	evm.model.scaffold546_size167141.2	Protein CfxQ like	EC:3.6.1.3;EC:3.6.1.15	O	AT3G24530.1	AAA-type_ATPase_family_protein_/_ankyrin_repeat_family_protein
REFERENCE	evm.model.scaffold543_size170649.1	Cationic amino acid transporter 9, chloroplastic	noEC	E	AT1G05940.2	cationic_amino_acid_transporter_9
REFERENCE	evm.model.scaffold541_size172255.2	Elongation factor 2	EC:3.6.1.15	J	AT1G56070.3	Ribosomal_protein_S5/Elongation_factor_G/III/V_family_protein
REFERENCE	evm.model.scaffold541_size172255.1	elongation factor 2	EC:3.6.1.15	J	AT1G56070.3	Ribosomal_protein_S5/Elongation_factor_G/III/V_family_protein
REFERENCE	evm.model.scaffold540_size172311.13	6-phosphogluconate dehydrogenase, decarboxylating	EC:1.1.1.43;EC:1.1.1.44	G	AT1G64190.1	6-phosphogluconate_dehydrogenase_family_protein
REFERENCE	evm.model.scaffold538_size173939.22	probable L-ascorbate peroxidase 6, chloroplastic isoform X1	EC:1.11.1.5;EC:1.11.1.7;EC:1.11.1.11	E	AT1G77490.1	thylakoidal_ascorbate_peroxidase
REFERENCE	evm.model.scaffold538_size173939.3	ATP-dependent Clp protease proteolytic subunit	EC:3.4.21;EC:3.6.1.3;EC:3.6.1.15	O	AT1G02560.1	nuclear_encoded_CLP_protease_5
REFERENCE	evm.model.scaffold537_size174685.33	pentatricopeptide repeat-containing protein At5g04810, chloroplastic	noEC	A	AT5G04810.2	pentatricopeptide_(PPR)_repeat-containing_protein
TEST	evm.model.scaffold537_size174685.22	4-sulfomuconolactone hydrolase	EC:3.1.1.1;EC:3.1.1.92	S	AT2G35450.1	catalytic/_hydrolase
REFERENCE	evm.model.scaffold537_size174685.18	Peptidyl-prolyl cis-trans isomerase	EC:5.2.1.8	O	AT5G13120.2	cyclophilin_20-2
REFERENCE	evm.model.scaffold537_size174685.7	Ferredoxin	noEC	C	AT1G32550.1	2Fe-2S_ferredoxin-like_superfamily_protein
REFERENCE	evm.model.scaffold535_size176836.13	Transcription factor like	noEC	K	AT3G01770.1	bromodomain_and_extraterminal_domain_protein_10
REFERENCE	evm.model.scaffold534_size177025.33	p-Nitrophenyl phosphatase	EC:3.1.3.3	G	AT5G10460.1	Haloacid_dehalogenase-like_hydrolase_(HAD)_superfamily_protein
REFERENCE	evm.model.scaffold534_size177025.4	ribonuclease J-like isoform X1	noEC	AK	AT5G63420.1	RNA-metabolising_metallo-beta-lactamase_family_protein
REFERENCE	evm.model.scaffold532_size179252.34	Chaperone protein dnaJ 8, chloroplastic	noEC	O	AT1G80920.1	Chaperone_DnaJ-domain_superfamily_protein
REFERENCE	evm.model.scaffold532_size179252.22	Pyrophosphate-energized vacuolar membrane proton pump	EC:7.1.3.1;EC:3.6.1.1	C	AT1G15690.1	Inorganic_H_pyrophosphatase_family_protein
REFERENCE	evm.model.scaffold532_size179252.21	Pyrophosphate-energized vacuolar membrane proton pump	EC:7.1.3.1;EC:3.6.1.1	C	AT1G15690.1	Inorganic_H_pyrophosphatase_family_protein
REFERENCE	evm.model.scaffold532_size179252.10	Methylcrotonoyl-CoA carboxylase subunit alpha, mitochondrial (Fragment)	EC:6.4.1.4	C	AT1G03090.2	methylcrotonyl-CoA_carboxylase_alpha_chain
REFERENCE	evm.model.scaffold532_size179252.7	Stress-response A/B barrel domain-containing protein	noEC	S	AT5G22580.1	Stress_responsive_A/B_Barrel_Domain-containing_protein
REFERENCE	evm.model.scaffold532_size179252.3	Beta-carotene isomerase	noEC	S	AT1G03055.1	beta-carotene_isomerase_D27-like_protein
REFERENCE	evm.model.scaffold531_size179314.3	Acetolactate synthase	EC:2.2.1.6	EH	AT3G48560.1	chlorsulfuron/imidazolinone_resistant_1
REFERENCE	evm.model.scaffold531_size179314.1	protein RETICULATA-RELATED 3, chloroplastic-like	noEC	S	AT3G08640.1	alphavirus_core_family_protein_(DUF3411)
REFERENCE	evm.model.scaffold530_size179357.23	Acetyltransferase component of pyruvate dehydrogenase complex	EC:2.3.1.38;EC:2.3.1.12	C	AT1G54220.2	Dihydrolipoamide_acetyltransferase%2C_long_form_protein
REFERENCE	evm.model.scaffold530_size179357.20	Acetyltransferase component of pyruvate dehydrogenase complex	EC:2.3.1.38;EC:2.3.1.12	C	AT1G54220.2	Dihydrolipoamide_acetyltransferase%2C_long_form_protein
REFERENCE	evm.model.scaffold530_size179357.17	Mitochondrial ubiquitin ligase activator of nfkb 1	noEC	O	AT1G54150.1	E3_Ubiquitin_ligase_family_protein
REFERENCE	evm.model.scaffold530_size179357.14	V-type proton ATPase catalytic subunit A	EC:3.6.1.3;EC:7.1.2.1;EC:3.6.1.15	C	AT1G78900.2	vacuolar_ATP_synthase_subunit_A
REFERENCE	evm.model.scaffold529_size179514.3	Phosphoribosylanthranilate transferase	EC:2.4.2.18	E	AT5G17990.1	tryptophan_biosynthesis_1
REFERENCE	evm.model.scaffold529_size179514.1	anthranilate phosphoribosyltransferase, chloroplastic-like	EC:2.4.2.18	E	AT5G17990.1	tryptophan_biosynthesis_1
REFERENCE	evm.model.scaffold528_size179813.33	Delta-1-pyrroline-5-carboxylate synthase	EC:1.2.1.41;EC:2.7.2.11	E	AT3G55610.1	delta_1-pyrroline-5-carboxylate_synthase_2
REFERENCE	evm.model.scaffold527_size181175.19	Porphobilinogen deaminase	noEC	none	AT2G36145.1	hypothetical_protein
REFERENCE	evm.model.scaffold527_size181175.9	Omega-amidase, chloroplastic	EC:3.5.1.3	E	AT5G12040.1	Nitrilase/cyanide_hydratase_and_apolipoprotein_N-acyltransferase_family_protein
REFERENCE	evm.model.scaffold526_size182367.53	Early nodulin-like protein 1	noEC	S	noTAIR	NULL
REFERENCE	evm.model.scaffold526_size182367.10	Pyrophosphate-energised proton pump	EC:7.1.3.1;EC:3.6.1.1	C	AT1G15690.1	Inorganic_H_pyrophosphatase_family_protein
TEST	evm.model.scaffold525_size182403.7	alternative NAD(P)H-ubiquinone oxidoreductase C1, chloroplastic/mitochondrial isoform X1	EC:1.6.99.3;EC:1.6.5.2	C	AT5G08740.1	NAD(P)H_dehydrogenase_C1
REFERENCE	evm.model.scaffold525_size182403.3	Pentatricopeptide repeat-containing protein, chloroplastic	noEC	S	AT3G04760.1	Pentatricopeptide_repeat_(PPR-like)_superfamily_protein
REFERENCE	evm.model.scaffold524_size182843.32	Oxygen-evolving enhancer protein 1, chloroplastic	noEC	S	AT3G50820.1	photosystem_II_subunit_O-2
REFERENCE	evm.model.scaffold524_size182843.29	Nam-like protein	noEC	K	AT1G01720.1	NAC_(No_Apical_Meristem)_domain_transcriptional_regulator_superfamily_protein
REFERENCE	evm.model.scaffold524_size182843.28	psbP domain-containing protein 2, chloroplastic	noEC	S	AT2G28605.1	Photosystem_II_reaction_center_PsbP_family_protein
REFERENCE	evm.model.scaffold524_size182843.26	Putative glucan 1,3-alpha-glucosidase	EC:3.2.1.20;EC:3.2.1.84	G	AT5G63840.1	Glycosyl_hydrolases_family_31_protein
REFERENCE	evm.model.scaffold524_size182843.24	Pentatricopeptide repeat-containing protein	noEC	S	AT3G29290.5	Pentatricopeptide_repeat_(PPR)_superfamily_protein
REFERENCE	evm.model.scaffold524_size182843.19	Non-specific serine/threonine protein kinase	EC:2.7.10;EC:2.7.11	T	AT3G01090.3	SNF1_kinase_homolog_10
REFERENCE	evm.model.scaffold524_size182843.4	mitochondrial outer membrane protein porin of 34 kDa	noEC	P	AT3G01280.1	voltage_dependent_anion_channel_1
REFERENCE	evm.model.scaffold524_size182843.1	inactive LRR receptor-like serine/threonine-protein kinase BIR2	EC:2.7.11	T	AT3G28450.1	Leucine-rich_repeat_protein_kinase_family_protein
REFERENCE	evm.model.scaffold523_size183550.38	Isocitrate dehydrogenase [NADP]	EC:1.1.1.42	C	AT1G65930.1	cytosolic_NADP+-dependent_isocitrate_dehydrogenase
REFERENCE	evm.model.scaffold523_size183550.18	Alanine aminotransferase 2	EC:2.6.1.12;EC:2.6.1.2	E	AT1G72330.1	alanine_aminotransferase_2
REFERENCE	evm.model.scaffold523_size183550.14	Lipoxygenase	EC:1.13.11;EC:1.13.11.12	E	AT1G17420.1	lipoxygenase_3
REFERENCE	evm.model.scaffold522_size183876.41	Structural maintenance of chromosomes protein	noEC	D	AT3G54670.1	Structural_maintenance_of_chromosomes_(SMC)_family_protein
REFERENCE	evm.model.scaffold522_size183876.29	Transcription termination factor mterf2, chloroplastic	noEC	K	AT2G21710.1	Mitochondrial_transcription_termination_factor_family_protein
REFERENCE	evm.model.scaffold521_size184735.3	Malic enzyme	EC:1.1.1.38;EC:1.1.1.39	C	AT4G00570.1	NAD-dependent_malic_enzyme_2
REFERENCE	evm.model.scaffold521_size184735.2	Digalactosyldiacylglycerol synthase	EC:2.4.1.241	S	AT3G11670.2	UDP-Glycosyltransferase_superfamily_protein
REFERENCE	evm.model.scaffold520_size185269.30	GDP-fucose protein O-fucosyltransferase	noEC	G	AT2G44500.1	O-fucosyltransferase_family_protein
REFERENCE	evm.model.scaffold519_size185338.16	Aquaporin PIP1-2	noEC	P	AT2G45960.1	plasma_membrane_intrinsic_protein_1B
REFERENCE	evm.model.scaffold519_size185338.15	ATG8-interacting protein 1 isoform X2	noEC	V	AT2G45980.1	mesoderm_induction_early_response_protein
REFERENCE	evm.model.scaffold519_size185338.8	50S ribosomal protein L5, chloroplastic	noEC	J	AT4G01310.1	Ribosomal_L5P_family_protein
REFERENCE	evm.model.scaffold518_size185628.12	Chlorophyll a-b binding protein, chloroplastic	noEC	C	AT2G34430.1	light-harvesting_chlorophyll-protein_complex_II_subunit_B1
TEST	evm.model.scaffold517_size186048.20	Membrane-associated protein vipp1, chloroplastic	noEC	KT	AT1G65260.1	plastid_transcriptionally_active_4
REFERENCE	evm.model.scaffold517_size186048.19	Proteinaceous RNase P 1, chloroplastic/mitochondrial	EC:3.1.30;EC:3.1.26;EC:3.1.26.5	V	AT2G32230.2	proteinaceous_RNase_P_1
REFERENCE	evm.model.scaffold516_size186372.24	Geranylgeranyl diphosphate reductase, chloroplastic	EC:1.3.1.83	C	AT1G74470.1	Pyridine_nucleotide-disulfide_oxidoreductase_family_protein
REFERENCE	evm.model.scaffold516_size186372.11	DExH-box ATP-dependent RNA helicase DExH8	EC:3.6.1.3;EC:3.6.4.13;EC:3.6.1.15	A	AT2G47680.1	zinc_finger_(CCCH_type)_helicase_family_protein
REFERENCE	evm.model.scaffold516_size186372.9	Glutathione S-transferase	EC:2.5.1.18	O	AT2G47730.2	glutathione_S-transferase_phi_8
REFERENCE	evm.model.scaffold516_size186372.8	Glutathione S-transferase	EC:2.5.1.18	O	AT2G47730.2	glutathione_S-transferase_phi_8
REFERENCE	evm.model.scaffold516_size186372.7	Glutathione S-transferase	EC:2.5.1.18	O	AT1G02920.1	glutathione_S-transferase_7
REFERENCE	evm.model.scaffold516_size186372.6	spermatogenesis-associated protein 20	noEC	O	AT4G03200.2	catalytics
REFERENCE	evm.model.scaffold516_size186372.5	spermatogenesis-associated protein 20-like	noEC	O	AT4G03200.1	catalytics
REFERENCE	evm.model.scaffold515_size186375.30	protein VTE6, chloroplastic	noEC	S	AT1G78620.1	integral_membrane_protein_(Protein_of_unknown_function_DUF92%2C_transmembrane)
REFERENCE	evm.model.scaffold512_size187211.59	membrane steroid-binding protein 2-like	noEC	S	AT5G52240.1	membrane_steroid_binding_protein_1
REFERENCE	evm.model.scaffold510_size188534.63	60S ribosomal protein L7-2-like	noEC	J	AT2G44120.2	Ribosomal_protein_L30/L7_family_protein
REFERENCE	evm.model.scaffold510_size188534.57	protein SMAX1-LIKE 4-like	noEC	O	AT4G29920.2	Double_Clp-N_motif-containing_P-loop_nucleoside_triphosphate_hydrolases_superfamily_protein
TEST	evm.model.scaffold510_size188534.42	Methyltransferase type 11	noEC	S	AT4G29590.1	S-adenosyl-L-methionine-dependent_methyltransferases_superfamily_protein
REFERENCE	evm.model.scaffold509_size189280.14	pentatricopeptide repeat-containing protein At4g18520-like	noEC	S	AT4G18520.1	Pentatricopeptide_repeat_(PPR)_superfamily_protein
REFERENCE	evm.model.scaffold509_size189280.11	endoplasmin homolog	EC:3.6.1.3;EC:3.2.1.97;EC:3.6.1.15	O	AT4G24190.1	Chaperone_protein_htpG_family_protein
TEST	evm.model.scaffold509_size189280.5	leiomodin-2-like isoform X1	noEC	S	AT1G34000.1	one-helix_protein_2
REFERENCE	evm.model.scaffold509_size189280.4	Protein MITOFERRINLIKE 1, chloroplastic	noEC	C	AT5G42130.1	Mitochondrial_substrate_carrier_family_protein
REFERENCE	evm.model.scaffold508_size190849.49	Endoglucanase	EC:3.2.1.4	G	AT1G70710.1	glycosyl_hydrolase_9B1
REFERENCE	evm.model.scaffold508_size190849.38	Chaperone protein dnaJ 11 like	noEC	O	AT3G13310.1	Chaperone_DnaJ-domain_superfamily_protein
TEST	evm.model.scaffold506_size193237.20	protein BOLA4, chloroplastic/mitochondrial	noEC	T	AT5G17560.1	BolA-like_family_protein
REFERENCE	evm.model.scaffold505_size193468.27	Protein translocase subunit SecA	EC:3.6.1.3;EC:7.4.2.3;EC:7.4.2.4;EC:7.4.2.5;EC:3.6.1.15	U	AT1G21650.2	Preprotein_translocase_SecA_family_protein
REFERENCE	evm.model.scaffold504_size193966.48	heat shock 70 kDa protein 17	noEC	O	AT4G16660.1	heat_shock_protein_70_(Hsp_70)_family_protein
REFERENCE	evm.model.scaffold503_size196565.25	Chlorophyll a-b binding protein, chloroplastic	noEC	C	AT1G29930.1	chlorophyll_A/B_binding_protein_1
REFERENCE	evm.model.scaffold503_size196565.18	GDSL esterase/lipase At5g45670-like	EC:3.1.1.1;EC:3.1.1.3	L	AT5G45670.1	GDSL-like_Lipase/Acylhydrolase_superfamily_protein
REFERENCE	evm.model.scaffold503_size196565.9	Phosphoglycerate kinase	EC:2.7.2.3	G	AT1G79550.2	phosphoglycerate_kinase
REFERENCE	evm.model.scaffold503_size196565.7	Putative ovule protein	noEC	none	AT1G16790.1	ribosomal_protein-like_protein
REFERENCE	evm.model.scaffold498_size197487.54	Phosphoglycerate kinase	EC:2.7.2.3;EC:2.1.1.33	G	AT1G56190.2	Phosphoglycerate_kinase_family_protein
REFERENCE	evm.model.scaffold498_size197487.33	Heat shock 70 kDa protein, mitochondrial	EC:3.6.1.3;EC:3.6.1.15	O	AT5G09590.1	mitochondrial_HSO70_2
REFERENCE	evm.model.scaffold498_size197487.30	Histidyl-tRNA synthetase	EC:6.1.1.21	J	AT3G46100.1	Histidyl-tRNA_synthetase_1
REFERENCE	evm.model.scaffold498_size197487.25	pentatricopeptide repeat-containing protein MRL1, chloroplastic-like isoform X2	noEC	S	AT4G34830.1	Pentatricopeptide_repeat_(PPR)_superfamily_protein
REFERENCE	evm.model.scaffold498_size197487.8	triose phosphate/phosphate translocator, non-green plastid, chloroplastic-like	noEC	EG	AT5G33320.1	Glucose-6-phosphate/phosphate_translocator-like_protein
REFERENCE	evm.model.scaffold497_size197723.24	RNA polymerase sigma factor	noEC	K	AT1G08540.1	RNApolymerase_sigma_subunit_2
REFERENCE	evm.model.scaffold495_size198985.53	PGRL1A transmembrane protein	noEC	S	AT4G22890.4	PGR5-LIKE_A
REFERENCE	evm.model.scaffold495_size198985.2	40S ribosomal protein S8	EC:3.6.1.15	J	AT5G59240.1	Ribosomal_protein_S8e_family_protein
REFERENCE	evm.model.scaffold493_size200783.42	LL-diaminopimelate aminotransferase, chloroplastic	EC:2.6.1.83	E	AT4G33680.1	Pyridoxal_phosphate_(PLP)-dependent_transferases_superfamily_protein
TEST	evm.model.scaffold493_size200783.41	Protein Iojap, chloroplastic	noEC	S	AT3G12930.1	Lojap-related_protein
REFERENCE	evm.model.scaffold493_size200783.14	stromal 70 kDa heat shock-related protein, chloroplastic-like	EC:3.1.30;EC:3.1.26;EC:3.1.26.4	O	AT4G24280.1	chloroplast_heat_shock_protein_70-1
REFERENCE	evm.model.scaffold493_size200783.13	peroxisomal fatty acid beta-oxidation multifunctional protein AIM1-like	EC:1.1.1.35;EC:5.3.3.8;EC:4.2.1.17;EC:5.1.2.3	I	AT4G29010.1	Enoyl-CoA_hydratase/isomerase_family
REFERENCE	evm.model.scaffold492_size200913.36	Alpha-1,4 glucan phosphorylase	EC:2.4.1.1	G	AT3G29320.1	Glycosyl_transferase%2C_family_35
REFERENCE	evm.model.scaffold492_size200913.12	Heat shock protein 90-5, chloroplastic	noEC	O	AT2G04030.1	Chaperone_protein_htpG_family_protein
REFERENCE	evm.model.scaffold492_size200913.9	DExH-box ATP-dependent RNA helicase DExH15 chloroplastic	EC:3.6.1.3;EC:3.6.4.13;EC:3.6.1.15	A	AT1G70070.1	DEAD/DEAH_box_helicase
REFERENCE	evm.model.scaffold491_size201213.41	prohibitin-1, mitochondrial-like	noEC	O	AT4G28510.1	prohibitin_1
TEST	evm.model.scaffold491_size201213.39	Putative ovule protein	EC:2.7.7.6	none	AT2G41950.1	DNA-directed_RNA_polymerase_subunit_beta
REFERENCE	evm.model.scaffold488_size202194.33	Electron transport accessory protein-like domain-containing protein	noEC	S	AT2G20260.1	photosystem_I_subunit_E-2
REFERENCE	evm.model.scaffold487_size202209.46	mitogen-activated protein kinase kinase 5-like	EC:2.7.11	T	AT3G21220.2	MAP_kinase_kinase_5
REFERENCE	evm.model.scaffold487_size202209.40	anthranilate synthase alpha subunit 2, chloroplastic-like isoform X1	EC:4.1.3.27	E	AT5G05730.1	anthranilate_synthase_alpha_subunit_1
REFERENCE	evm.model.scaffold486_size202863.42	Putative plasma membrane Na(+) /H(+) antiporter	noEC	P	AT2G01980.1	sodium_proton_exchanger%2C_putative_(NHX7)_(SOS1)
REFERENCE	evm.model.scaffold486_size202863.22	Beta-glucosidase 40-like	EC:3.2.1.21;EC:3.2.1.23;EC:3.2.1.39;EC:3.2.1.38	G	AT1G26560.1	beta_glucosidase_40
REFERENCE	evm.model.scaffold486_size202863.18	Potassium transporter	noEC	P	AT1G60160.1	Potassium_transporter_family_protein
REFERENCE	evm.model.scaffold486_size202863.13	Tetratricopeptide-like helical	noEC	none	AT3G26580.1	Tetratricopeptide_repeat_(TPR)-like_superfamily_protein
REFERENCE	evm.model.scaffold486_size202863.7	Putative ovule protein	noEC	none	AT1G16790.1	ribosomal_protein-like_protein
REFERENCE	evm.model.scaffold486_size202863.1	Alpha-D-phosphohexomutase superfamily	EC:5.4.2.2	G	AT1G23190.1	Phosphoglucomutase/phosphomannomutase_family_protein
REFERENCE	evm.model.scaffold485_size203089.33	Caffeoylshikimate esterase-like	EC:2.3.1.22	I	AT1G77420.1	alpha/beta-Hydrolases_superfamily_protein
REFERENCE	evm.model.scaffold483_size203934.9	Gtp-binding protein brassinazole insensitive pale green 2, chloroplastic	EC:3.6.1.15	S	AT4G10620.1	P-loop_containing_nucleoside_triphosphate_hydrolases_superfamily_protein
REFERENCE	evm.model.scaffold483_size203934.8	Acyl-[acyl-carrier-protein] hydrolase	EC:2.3.1.85;EC:3.1.2.14	I	AT3G25110.1	fatA_acyl-ACP_thioesterase
REFERENCE	evm.model.scaffold483_size203934.7	Protein DETOXIFICATION	noEC	V	AT1G71140.1	MATE_efflux_family_protein
REFERENCE	evm.model.scaffold482_size205035.44	RuBisCO large subunit-binding protein subunit alpha	noEC	O	AT2G28000.1	chaperonin-60alpha
TEST	evm.model.scaffold482_size205035.21	mini-chromosome maintenance complex-binding protein	noEC	S	AT2G40550.1	E2F_target_protein_1_(ETG1)
TEST	evm.model.scaffold481_size205178.8	photosystem II repair protein PSB27-H1, chloroplastic	noEC	S	AT1G03600.1	photosystem_II_family_protein
REFERENCE	evm.model.scaffold480_size206361.5	Magnesium-protoporphyrin IX monomethyl ester [oxidative] cyclase, chloroplastic (Fragment)	EC:1.14.13.81;EC:1.14.13	S	AT3G56940.1	dicarboxylate_diiron_protein%2C_putative_(Crd1)
REFERENCE	evm.model.scaffold478_size208472.39	30S ribosomal protein S13, chloroplastic	noEC	J	AT5G14320.1	Ribosomal_protein_S13/S18_family
REFERENCE	evm.model.scaffold478_size208472.30	Dihydrolipoamide acetyltransferase component of pyruvate dehydrogenase complex	noEC	C	AT1G34430.1	2-oxoacid_dehydrogenases_acyltransferase_family_protein
TEST	evm.model.scaffold478_size208472.28	Tetratricopeptide-like helical	noEC	S	AT1G22700.2	Tetratricopeptide_repeat_(TPR)-like_superfamily_protein
REFERENCE	evm.model.scaffold477_size208692.22	nuclear-pore anchor	noEC	Z	AT1G79280.3	nuclear_pore_anchor
REFERENCE	evm.model.scaffold477_size208692.21	Calnexin-like protein	noEC	O	AT5G61790.1	calnexin_1
REFERENCE	evm.model.scaffold476_size209410.44	Photosystem II subunit P-1	noEC	C	AT1G06680.1	photosystem_II_subunit_P-1
REFERENCE	evm.model.scaffold476_size209410.43	2,3-bisphosphoglycerate-independent phosphoglycerate mutase	EC:5.4.2.1	G	AT1G09780.1	Phosphoglycerate_mutase%2C_2%2C3-bisphosphoglycerate-independent
REFERENCE	evm.model.scaffold476_size209410.41	Acyl carrier protein	noEC	none	AT4G13500.1	transmembrane_protein
REFERENCE	evm.model.scaffold476_size209410.22	ATP-dependent zinc metalloprotease FTSH 10, mitochondrial-like isoform X1	EC:3.4.24	O	AT1G07510.1	FTSH_protease_10
REFERENCE	evm.model.scaffold476_size209410.3	Protein CURVATURE THYLAKOID 1B, chloroplastic	noEC	S	AT2G46820.2	photosystem_I_P_subunit
REFERENCE	evm.model.scaffold476_size209410.2	Protein TRIGALACTOSYLDIACYLGLYCEROL 3, chloroplastic	EC:3.6.1.3;EC:3.6.3.25;EC:7.3.2.3;EC:3.6.1.15	Q	AT1G65410.1	non-intrinsic_ABC_protein_11
REFERENCE	evm.model.scaffold475_size210170.36	Glutamate receptor	noEC	P	AT1G05200.6	glutamate_receptor_3.4
REFERENCE	evm.model.scaffold475_size210170.3	Chaperone protein DnaJ	noEC	O	AT1G80030.3	Molecular_chaperone_Hsp40/DnaJ_family_protein
REFERENCE	evm.model.scaffold474_size210406.48	isoleucine--tRNA ligase, chloroplastic/mitochondrial	EC:6.1.1.5;EC:3.1.1.1	J	AT5G49030.3	tRNA_synthetase_class_I_(I%2C_L%2C_M_and_V)_family_protein
REFERENCE	evm.model.scaffold474_size210406.43	Dihydrolipoyl dehydrogenase 2, chloroplastic	EC:1.8.1.4	C	AT3G16950.1	lipoamide_dehydrogenase_1
REFERENCE	evm.model.scaffold474_size210406.27	DEAD-box ATP-dependent RNA helicase 50	EC:3.6.1.3;EC:3.6.4.13;EC:3.6.1.15	A	AT3G06980.1	DEA(D/H)-box_RNA_helicase_family_protein
REFERENCE	evm.model.scaffold472_size211008.47	Limonene hydroxylase	EC:3.1.1.26;EC:3.1.1.1	I	AT1G02660.1	alpha/beta-Hydrolases_superfamily_protein
REFERENCE	evm.model.scaffold471_size212349.18	Protein tic 22, chloroplastic	noEC	S	AT4G33350.1	Tic22-like_family_protein
REFERENCE	evm.model.scaffold470_size212680.18	Pleiotropic drug resistance protein 12	EC:3.6.1.3;EC:3.6.3.25;EC:7.3.2.3;EC:3.6.1.15	Q	AT1G59870.1	ABC-2_and_Plant_PDR_ABC-type_transporter_family_protein
REFERENCE	evm.model.scaffold470_size212680.15	6,7-dimethyl-8-ribityllumazine synthase	EC:2.5.1.78	H	AT2G44050.1	6%2C7-dimethyl-8-ribityllumazine_synthase_/_DMRL_synthase_/_lumazine_synthase_/_riboflavin_synthase
REFERENCE	evm.model.scaffold470_size212680.9	Peptidylprolyl isomerase	EC:5.2.1.8	O	AT2G43560.1	FKBP-like_peptidyl-prolyl_cis-trans_isomerase_family_protein
REFERENCE	evm.model.scaffold470_size212680.2	rhodanese-like domain-containing protein 4, chloroplastic	EC:3.2.1.14	S	AT4G01050.1	thylakoid_rhodanese-like_protein
REFERENCE	evm.model.scaffold469_size213041.21	Glucose-1-phosphate adenylyltransferase	EC:2.7.7.27	M	AT5G48300.1	ADP_glucose_pyrophosphorylase_1
REFERENCE	evm.model.scaffold469_size213041.4	ABC transporter I family member 6, chloroplastic-like	EC:3.6.1.3;EC:7.6.2.11;EC:7.4.2.5;EC:7.4.2.6;EC:3.6.1.15	Q	AT3G10670.1	non-intrinsic_ABC_protein_7
REFERENCE	evm.model.scaffold469_size213041.3	protein ORANGE, chloroplastic	noEC	S	AT5G61670.2	orange_protein
REFERENCE	evm.model.scaffold465_size216503.28	1-(5-phosphoribosyl)-5-[(5-phosphoribosylamino)methylideneamino] imidazole-4-carboxamide isomerase, chloroplastic	EC:5.3.1.16	E	AT2G36230.1	Aldolase-type_TIM_barrel_family_protein
REFERENCE	evm.model.scaffold465_size216503.12	Ribosomal protein L7, eukaryotic	noEC	J	AT2G01250.2	Ribosomal_protein_L30/L7_family_protein
REFERENCE	evm.model.scaffold464_size216925.4	Chloroplast channel forming outer membrane protein	noEC	S	AT1G76405.2	outer_envelope_pore_21B-like_protein
REFERENCE	evm.model.scaffold464_size216925.3	Localized to the inner membrane of the chloroplast	noEC	none	AT1G42960.1	inner_membrane_localized_protein
REFERENCE	evm.model.scaffold462_size217632.45	General substrate transporter	noEC	S	AT3G20660.1	organic_cation/carnitine_transporter4
REFERENCE	evm.model.scaffold462_size217632.41	DNA gyrase subunit A, chloroplastic/mitochondrial	EC:3.6.1.3;EC:5.99.1.3;EC:3.6.1.15	B	AT3G10690.1	DNA_GYRASE_A
REFERENCE	evm.model.scaffold462_size217632.40	DNA gyrase subunit A, chloroplastic/mitochondrial	EC:3.6.1.3;EC:5.99.1.3;EC:3.6.1.15	B	AT3G10690.1	DNA_GYRASE_A
REFERENCE	evm.model.scaffold462_size217632.37	protein SPA, chloroplastic	EC:5.3.4.1	S	AT1G75690.1	DnaJ/Hsp40_cysteine-rich_domain_superfamily_protein
REFERENCE	evm.model.scaffold462_size217632.19	TVP38/TMEM64 family membrane protein slr0305-like	noEC	S	AT1G22850.1	SNARE_associated_Golgi_protein_family
REFERENCE	evm.model.scaffold462_size217632.14	Putative ovule protein	noEC	O	AT4G10000.2	Thioredoxin_family_protein
REFERENCE	evm.model.scaffold462_size217632.8	F-BAR domain only protein	noEC	D	AT5G57460.1	muniscin_carboxy-terminal_mu-like_domain_protein
TEST	evm.model.scaffold461_size219499.40	Histidinol-phosphate aminotransferase	EC:2.6.1.9	E	AT5G10330.2	histidinol_phosphate_aminotransferase_1
REFERENCE	evm.model.scaffold461_size219499.38	Potassium transporter	noEC	P	AT1G60160.1	Potassium_transporter_family_protein
REFERENCE	evm.model.scaffold461_size219499.14	Ascorbate peroxidase	EC:1.11.1.7;EC:1.11.1.11	E	AT1G07890.8	ascorbate_peroxidase_1
TEST	evm.model.scaffold461_size219499.8	PGR5-like protein 1B, chloroplastic isoform X1	noEC	S	AT5G59400.1	PGR5-like_A_protein
REFERENCE	evm.model.scaffold461_size219499.5	Chaperone DnaJ-domain superfamily protein	noEC	O	AT5G59610.4	Chaperone_DnaJ-domain_superfamily_protein
REFERENCE	evm.model.scaffold461_size219499.2	xylulose 5-phosphate/phosphate translocator, chloroplastic	EC:2.7.11;EC:2.7.11.22	EG	AT5G17630.1	Nucleotide/sugar_transporter_family_protein
REFERENCE	evm.model.scaffold460_size220093.54	Protein MAINTENANCE OF PSII UNDER HIGH LIGHT 1	noEC	S	AT5G07020.1	proline-rich_family_protein
REFERENCE	evm.model.scaffold460_size220093.52	Tyrosine--tRNA ligase	EC:6.1.1.1	J	AT3G02660.2	Tyrosyl-tRNA_synthetase%2C_class_Ib%2C_bacterial/mitochondrial
REFERENCE	evm.model.scaffold460_size220093.23	protein root UVB sensitive 2, chloroplastic	noEC	S	AT2G31190.2	root_UVB_sensitive_protein_(Protein_of_unknown_function%2C_DUF647)
REFERENCE	evm.model.scaffold460_size220093.9	Folate-biopterin transporter 1, chloroplastic	noEC	S	AT2G32040.1	Major_facilitator_superfamily_protein
REFERENCE	evm.model.scaffold460_size220093.6	Dephospho-CoA kinase	EC:2.7.1.24	H	AT2G27490.4	dephospho-CoA_kinase_family
REFERENCE	evm.model.scaffold460_size220093.4	Dephospho-CoA kinase	EC:2.7.1.24	H	AT2G27490.4	dephospho-CoA_kinase_family
REFERENCE	evm.model.scaffold459_size221187.46	Sufe-like protein 2, chloroplastic	noEC	S	AT1G67810.1	sulfur_E2
TEST	evm.model.scaffold459_size221187.6	Synechocystis YCF37	noEC	none	AT2G23670.1	homolog_of_Synechocystis_YCF37
REFERENCE	evm.model.scaffold458_size221370.47	probable 1-deoxy-D-xylulose-5-phosphate synthase, chloroplastic	EC:2.2.1.7	G	AT4G15560.1	Deoxyxylulose-5-phosphate_synthase
REFERENCE	evm.model.scaffold458_size221370.46	Photosystem i reaction center subunit ii, chloroplastic	noEC	C	noTAIR	NULL
REFERENCE	evm.model.scaffold457_size221634.52	fruit protein pKIWI502-like	EC:1.18.1;EC:1.18.1.2	CH	AT1G15140.1	FAD/NAD(P)-binding_oxidoreductase
REFERENCE	evm.model.scaffold454_size223947.5	Protein HHL1, chloroplastic	EC:3.4.24	O	AT1G67700.5	multidrug_resistance_protein
REFERENCE	evm.model.scaffold452_size225145.49	Cytochrome b5-like heme/steroid binding domain-containing protein	noEC	S	AT3G48890.1	membrane-associated_progesterone_binding_protein_3
REFERENCE	evm.model.scaffold452_size225145.25	Thylakoid lumenal protein, chloroplastic	noEC	S	AT1G12250.2	Pentapeptide_repeat-containing_protein
REFERENCE	evm.model.scaffold451_size225693.48	iron-sulfur assembly protein IscA, chloroplastic	noEC	P	AT1G10500.1	chloroplast-localized_ISCA-like_protein
REFERENCE	evm.model.scaffold451_size225693.11	red chlorophyll catabolite reductase, chloroplastic	noEC	S	AT4G37000.1	accelerated_cell_death_2_(ACD2)
REFERENCE	evm.model.scaffold448_size226196.71	glycine--tRNA ligase, chloroplastic/mitochondrial 2 isoform X3	EC:6.1.1.14;EC:6.1.1.19	J	AT3G48110.1	glycine-tRNA_ligase
REFERENCE	evm.model.scaffold448_size226196.70	Glycine--tRNA ligase	EC:6.1.1.14;EC:6.1.1.19	J	AT3G48110.1	glycine-tRNA_ligase
REFERENCE	evm.model.scaffold447_size226588.59	Ketoacyl-ACP Synthase II	EC:2.3.1.85;EC:2.3.1.41;EC:2.3.1.179	IQ	AT1G74960.3	fatty_acid_biosynthesis_1
REFERENCE	evm.model.scaffold447_size226588.51	Ribosomal protein	EC:3.2.2.23	J	AT5G35530.1	Ribosomal_protein_S3_family_protein
REFERENCE	evm.model.scaffold447_size226588.25	chaperone protein dnaJ 20, chloroplastic-like	noEC	O	AT4G13830.2	DNAJ-like_20
TEST	evm.model.scaffold447_size226588.11	Amine oxidase	noEC	H	AT3G09580.1	FAD/NAD(P)-binding_oxidoreductase_family_protein
REFERENCE	evm.model.scaffold447_size226588.7	stromal 70 kDa heat shock-related protein, chloroplastic	EC:1.3.1.74;EC:3.6.1.3;EC:3.6.1.15	O	AT5G49910.1	chloroplast_heat_shock_protein_70-2
REFERENCE	evm.model.scaffold447_size226588.1	Protein dcl, chloroplastic	noEC	S	AT3G46630.1	DCL_protein_(DUF3223)
REFERENCE	evm.model.scaffold446_size227560.3	Isopentenyl diphosphate isomerase (Fragment)	EC:5.3.3.2	Q	AT5G16440.1	isopentenyl_diphosphate_isomerase_1
TEST	evm.model.scaffold445_size228148.49	Oxygen-dependent coproporphyrinogen-III oxidase, chloroplastic	EC:1.3.3.3	H	AT1G03475.1	Coproporphyrinogen_III_oxidase
TEST	evm.model.scaffold445_size228148.48	Protein trigalactosyldiacylglycerol 2, chloroplastic	noEC	Q	AT3G20320.1	trigalactosyldiacylglycerol2
REFERENCE	evm.model.scaffold445_size228148.42	mitogen-activated protein kinase kinase 5-like	EC:2.7.11;EC:2.7.12.1	T	AT1G51660.1	mitogen-activated_protein_kinase_kinase_4
REFERENCE	evm.model.scaffold444_size228446.45	Alkaline/neutral invertase isoform 1	EC:3.2.1.97;EC:3.2.1.20;EC:3.2.1.26;EC:3.2.1.48	S	AT5G22510.2	alkaline/neutral_invertase
REFERENCE	evm.model.scaffold444_size228446.20	pheophytinase, chloroplastic	EC:3.1.1.1	S	AT5G13800.4	pheophytinase
REFERENCE	evm.model.scaffold443_size229734.69	Fructokinase-like 2, chloroplastic	noEC	G	AT1G69200.1	fructokinase-like_protein
REFERENCE	evm.model.scaffold443_size229734.65	Purple acid phosphatase	EC:3.1.3.2	G	AT1G13900.1	Purple_acid_phosphatases_superfamily_protein
REFERENCE	evm.model.scaffold443_size229734.40	ALBINO3-like protein 1, chloroplastic	noEC	OU	AT1G24490.1	OxaA/YidC-like_membrane_insertion_protein
REFERENCE	evm.model.scaffold443_size229734.37	3-oxoacyl-[acyl-carrier-protein] reductase	EC:2.3.1.85;EC:1.1.1.100	Q	AT1G24360.1	NAD(P)-binding_Rossmann-fold_superfamily_protein
REFERENCE	evm.model.scaffold443_size229734.8	Reactive intermediate deaminase a, chloroplastic	noEC	J	AT3G20390.1	endoribonuclease_L-PSP_family_protein
REFERENCE	evm.model.scaffold443_size229734.4	Dihydroxy-acid dehydratase	EC:4.2.1.9	E	AT3G23940.1	dehydratase_family
REFERENCE	evm.model.scaffold441_size232911.17	lipoxygenase homology domain-containing protein 1-like	noEC	S	AT2G22170.1	Lipase/lipooxygenase%2C_PLAT/LH2_family_protein
REFERENCE	evm.model.scaffold441_size232911.11	Trehalose 6-phosphate phosphatase	EC:3.1.3.12	G	AT5G65140.1	Haloacid_dehalogenase-like_hydrolase_(HAD)_superfamily_protein
REFERENCE	evm.model.scaffold440_size235831.19	Aminomethyltransferase	EC:3.1.30;EC:2.1.2.10;EC:3.1.26;EC:3.1.26.4	E	AT1G11860.3	Glycine_cleavage_T-protein_family
REFERENCE	evm.model.scaffold440_size235831.17	Citrate synthase	EC:2.3.3.1	C	AT2G44350.4	Citrate_synthase_family_protein
REFERENCE	evm.model.scaffold439_size236221.43	Geranylgeranyl diphosphate reductase, chloroplastic-like	EC:1.3.1.83	C	AT1G74470.1	Pyridine_nucleotide-disulfide_oxidoreductase_family_protein
REFERENCE	evm.model.scaffold439_size236221.32	uncharacterized hydrolase YNR064C isoform X1	EC:3.8.1.5	S	AT4G12830.1	alpha/beta-Hydrolases_superfamily_protein
REFERENCE	evm.model.scaffold438_size236227.46	Pentatricopeptide repeat-containing protein	noEC	S	AT4G30700.1	Pentatricopeptide_repeat_(PPR)_superfamily_protein
REFERENCE	evm.model.scaffold437_size236406.32	Mitochodrial transcription termination factor	noEC	K	AT1G79220.1	Mitochondrial_transcription_termination_factor_family_protein
TEST	evm.model.scaffold437_size236406.31	nitrogen regulatory protein P-II homolog	noEC	K	AT4G01900.1	nitrogen_regulatory_P-II-like_protein
REFERENCE	evm.model.scaffold437_size236406.17	Translocase of chloroplast	EC:7.4.2.3;EC:7.4.2.4;EC:3.6.1.15	F	AT5G05000.3	translocon_at_the_outer_envelope_membrane_of_chloroplasts_34
REFERENCE	evm.model.scaffold437_size236406.3	Tubulin beta chain	EC:3.6.1.15	Z	AT5G23860.2	tubulin_beta_8
REFERENCE	evm.model.scaffold437_size236406.2	Tubulin beta chain	EC:3.6.1.15	Z	AT5G23860.2	tubulin_beta_8
REFERENCE	evm.model.scaffold436_size236557.10	Ribulose-phosphate 3-epimerase, chloroplastic	EC:5.1.3.1	G	AT5G61410.2	D-ribulose-5-phosphate-3-epimerase
REFERENCE	evm.model.scaffold434_size237078.20	putative rRNA methylase YtqB	noEC	Q	AT1G16445.1	S-adenosyl-L-methionine-dependent_methyltransferases_superfamily_protein
REFERENCE	evm.model.scaffold434_size237078.18	Metacaspase-4 subunit p10 like	EC:3.4.22	DO	AT1G79340.1	metacaspase_4
REFERENCE	evm.model.scaffold433_size237148.90	(-)-alpha-terpineol synthase	EC:4.2.3.20;EC:4.2.3.14;EC:4.2.3.15;EC:4.2.3.106;EC:4.2.3.16	S	AT4G16730.2	terpene_synthase_02
REFERENCE	evm.model.scaffold433_size237148.89	Limonene synthase	EC:4.2.3.20;EC:4.2.3.14;EC:4.2.3.15;EC:4.2.3.106;EC:4.2.3.16	S	AT4G16730.1	terpene_synthase_02
REFERENCE	evm.model.scaffold433_size237148.88	(-)-alpha-terpineol synthase	EC:4.2.3.20;EC:4.2.3.14;EC:4.2.3.15;EC:4.2.3.106;EC:4.2.3.16	S	AT3G25820.4	terpene_synthase-like_sequence-1%2C8-cineole
REFERENCE	evm.model.scaffold432_size238105.61	Copper chaperone for superoxide dismutase	noEC	P	AT1G12520.3	copper_chaperone_for_SOD1
REFERENCE	evm.model.scaffold432_size238105.54	Bile acid-sodium symporter/arsenical resistance protein	noEC	P	AT2G26900.1	Sodium_Bile_acid_symporter_family
REFERENCE	evm.model.scaffold432_size238105.46	Sodium/pyruvate cotransporter BASS2, chloroplastic	noEC	P	AT2G26900.1	Sodium_Bile_acid_symporter_family
REFERENCE	evm.model.scaffold432_size238105.3	Glyceraldehyde-3-phosphate dehydrogenase	EC:1.2.1.59;EC:1.2.1.12	G	AT3G26650.1	glyceraldehyde_3-phosphate_dehydrogenase_A_subunit
REFERENCE	evm.model.scaffold431_size238522.33	Tryptophan synthase alpha chain	EC:4.2.1.20;EC:4.1.2.8	E	AT4G02610.1	Aldolase-type_TIM_barrel_family_protein
REFERENCE	evm.model.scaffold431_size238522.7	Nudix hydrolase 25	EC:3.6.1.9;EC:3.1.7.2;EC:3.6.1.17	G	AT1G30110.2	nudix_hydrolase_homolog_25
TEST	evm.model.scaffold430_size239863.25	Protein sickie like	noEC	none	AT1G68680.1	SH3/FCH_domain_protein
REFERENCE	evm.model.scaffold430_size239863.6	Phosphoribosylaminoimidazole carboxylase	EC:4.1.1.21	F	AT2G37690.1	phosphoribosylaminoimidazole_carboxylase%2C_putative_/_AIR_carboxylase
REFERENCE	evm.model.scaffold429_size240638.62	Inorganic pyrophosphatase	EC:3.6.1.1	C	AT5G09650.1	pyrophosphorylase_6
REFERENCE	evm.model.scaffold428_size240870.59	Phytoene desaturase	noEC	Q	AT4G14210.3	phytoene_desaturase_3
TEST	evm.model.scaffold428_size240870.45	ATP-dependent Clp protease ATP-binding subunit CLPT1, chloroplastic-like	noEC	O	AT4G25370.1	Double_Clp-N_motif_protein
REFERENCE	evm.model.scaffold428_size240870.41	probable mitochondrial intermediate peptidase, mitochondrial isoform X1	EC:3.4.11;EC:3.4.24	O	AT5G51540.1	Zincin-like_metalloproteases_family_protein
REFERENCE	evm.model.scaffold428_size240870.31	protein mago nashi homolog	noEC	A	AT1G02140.1	mago_nashi_family_protein
REFERENCE	evm.model.scaffold428_size240870.9	FkbH domain containing protein	noEC	S	AT4G28030.1	Acyl-CoA_N-acyltransferases_(NAT)_superfamily_protein
REFERENCE	evm.model.scaffold427_size242665.66	Arginine decarboxylase	EC:4.1.1.19	E	AT4G34710.2	arginine_decarboxylase_2
REFERENCE	evm.model.scaffold426_size243431.46	60S ribosomal protein L11	noEC	J	AT2G42740.1	ribosomal_protein_large_subunit_16A
REFERENCE	evm.model.scaffold426_size243431.19	Coatomer beta subunit	noEC	S	AT1G66330.2	senescence-associated_family_protein
REFERENCE	evm.model.scaffold426_size243431.13	Sec-independent protein translocase protein TATA, chloroplastic	EC:7.4.2.3;EC:7.4.2.4	U	AT5G28750.1	Bacterial_sec-independent_translocation_protein_mttA/Hcf106
REFERENCE	evm.model.scaffold426_size243431.6	ATP-dependent Clp protease proteolytic subunit	EC:3.4.21;EC:3.6.1.3;EC:3.6.1.15	O	AT5G45390.1	CLP_protease_P4
REFERENCE	evm.model.scaffold425_size243727.67	fatty acid desaturase 4, chloroplastic-like	noEC	O	AT4G27030.1	fatty_acid_desaturase_A
REFERENCE	evm.model.scaffold424_size243908.44	zinc protease PQQL-like	EC:3.4.24	O	AT5G56730.1	Insulinase_(Peptidase_family_M16)_protein
REFERENCE	evm.model.scaffold424_size243908.38	rRNA adenine N(6)-methyltransferase	EC:2.1.1.62	A	AT1G01860.1	Ribosomal_RNA_adenine_dimethylase_family_protein
REFERENCE	evm.model.scaffold424_size243908.30	40S ribosomal protein S13	noEC	J	AT4G00100.1	ribosomal_protein_S13A
REFERENCE	evm.model.scaffold424_size243908.21	Carotenoid cleavage dioxygenase 7	EC:1.13.11;EC:1.13.11.68;EC:1.13.11.51	Q	AT2G44990.3	carotenoid_cleavage_dioxygenase_7
REFERENCE	evm.model.scaffold424_size243908.17	Peptidylprolyl isomerase	EC:5.2.1.8	O	AT3G60370.1	FKBP-like_peptidyl-prolyl_cis-trans_isomerase_family_protein
REFERENCE	evm.model.scaffold424_size243908.11	Pentatricopeptide repeat-containing protein	noEC	S	AT1G02150.1	Tetratricopeptide_repeat_(TPR)-like_superfamily_protein
REFERENCE	evm.model.scaffold423_size245578.36	nudix hydrolase 26, chloroplastic	EC:3.6.1.9;EC:3.1.7.2;EC:3.6.1.17	G	AT3G10620.1	nudix_hydrolase_homolog_26
REFERENCE	evm.model.scaffold422_size246560.63	Pentatricopeptide repeat-containing protein, chloroplastic	noEC	S	AT4G16390.1	pentatricopeptide_(PPR)_repeat-containing_protein
REFERENCE	evm.model.scaffold422_size246560.62	Pentatricopeptide repeat-containing protein, chloroplastic	noEC	S	AT4G16390.1	pentatricopeptide_(PPR)_repeat-containing_protein
REFERENCE	evm.model.scaffold422_size246560.61	Pentatricopeptide repeat-containing protein, chloroplastic	noEC	S	AT4G16390.1	pentatricopeptide_(PPR)_repeat-containing_protein
REFERENCE	evm.model.scaffold421_size247372.59	Fatty acyl-CoA reductase	EC:1.2.1.84	I	AT3G11980.1	Jojoba_acyl_CoA_reductase-related_male_sterility_protein
REFERENCE	evm.model.scaffold421_size247372.54	Cleavage and polyadenylation specificity factor subunit like	noEC	S	AT5G08050.1	wiskott-aldrich_syndrome_family_protein%2C_putative_(DUF1118)
REFERENCE	evm.model.scaffold418_size248570.61	Pre-mRNA-processing factor 19	noEC	S	AT1G04510.1	MOS4-associated_complex_3A
TEST	evm.model.scaffold418_size248570.60	ATP-dependent (S)-NAD(P)H-hydrate dehydratase	EC:4.2.1.93;EC:4.2.1.136	G	AT5G19150.2	pfkB-like_carbohydrate_kinase_family_protein
TEST	evm.model.scaffold418_size248570.46	Pentatricopeptide repeat-containing protein	EC:1.11.1.7	S	AT3G04260.1	plastid_transcriptionally_active_3
REFERENCE	evm.model.scaffold418_size248570.42	mitochondrial substrate carrier family protein C	noEC	C	AT2G35800.1	mitochondrial_substrate_carrier_family_protein
TEST	evm.model.scaffold418_size248570.36	Chorismate synthase	EC:4.2.3.5	E	AT1G48850.1	chorismate_synthase%2C_putative_/_5-enolpyruvylshikimate-3-phosphate_phospholyase
REFERENCE	evm.model.scaffold418_size248570.28	NAC transcription factor	noEC	K	AT5G08790.1	NAC_(No_Apical_Meristem)_domain_transcriptional_regulator_superfamily_protein
TEST	evm.model.scaffold418_size248570.13	Sirohydrochlorin ferrochelatase, chloroplastic	EC:4.99.1.3;EC:4.99.1.4;EC:4.99.1.1	S	AT1G50170.1	sirohydrochlorin_ferrochelatase_B
REFERENCE	evm.model.scaffold417_size248619.15	probable sodium/metabolite cotransporter BASS5, chloroplastic isoform X1	noEC	P	AT4G22840.1	Sodium_Bile_acid_symporter_family
REFERENCE	evm.model.scaffold417_size248619.14	26S proteasome non-ATPase regulatory subunit 8 homolog A-like	noEC	O	AT1G64520.1	regulatory_particle_non-ATPase_12A
REFERENCE	evm.model.scaffold417_size248619.13	Copper chaperone for superoxide dismutase	EC:1.15.1.1	P	AT1G12520.1	copper_chaperone_for_SOD1
REFERENCE	evm.model.scaffold415_size249257.57	60S ribosomal protein L14	noEC	J	AT4G27090.1	Ribosomal_protein_L14
REFERENCE	evm.model.scaffold415_size249257.55	Aspartate carbamoyltransferase 1, chloroplastic	EC:2.1.3.2	EF	AT3G20330.2	PYRIMIDINE_B
REFERENCE	evm.model.scaffold415_size249257.25	Pentatricopeptide repeat-containing protein	noEC	S	AT3G49240.1	Pentatricopeptide_repeat_(PPR)_superfamily_protein
REFERENCE	evm.model.scaffold415_size249257.11	Nucleoid-associated protein YbaB/EbfC family	noEC	L	AT4G30620.1	Putative_BCR%2C_YbaB_family_COG0718
REFERENCE	evm.model.scaffold415_size249257.1	CSC1-like protein ERD4	noEC	S	AT1G30360.1	Early-responsive_to_dehydration_stress_protein_(ERD4)
REFERENCE	evm.model.scaffold414_size249511.76	Omega-3 fatty acid desaturase	EC:1.14.19	I	AT5G05580.1	fatty_acid_desaturase_8
REFERENCE	evm.model.scaffold414_size249511.73	Chaperone protein ClpB3, chloroplastic	noEC	O	AT5G15450.1	casein_lytic_proteinase_B3
REFERENCE	evm.model.scaffold414_size249511.53	Pentatricopeptide repeat-containing protein, chloroplastic	noEC	S	AT5G46580.1	pentatricopeptide_(PPR)_repeat-containing_protein
REFERENCE	evm.model.scaffold414_size249511.9	NifU-like protein 3, chloroplastic	noEC	O	AT4G25910.1	NFU_domain_protein_3
REFERENCE	evm.model.scaffold412_size250143.40	Pilus biogenesis/stability type IV	noEC	none	AT1G55480.1	protein_containing_PDZ_domain%2C_a_K-box_domain%2C_and_a_TPR_region
REFERENCE	evm.model.scaffold412_size250143.35	V-type proton ATPase subunit H	EC:3.6.1.3;EC:7.1.2.1;EC:3.6.1.15	C	AT3G42050.1	vacuolar_ATP_synthase_subunit_H_family_protein
REFERENCE	evm.model.scaffold412_size250143.27	Chaperone protein dnaJ 8, chloroplastic	noEC	O	AT1G80920.1	Chaperone_DnaJ-domain_superfamily_protein
REFERENCE	evm.model.scaffold412_size250143.3	putative uridine kinase C227.14 isoform X1	EC:2.7.1.48;EC:2.7.1.33	FH	AT1G03030.1	P-loop_containing_nucleoside_triphosphate_hydrolases_superfamily_protein
REFERENCE	evm.model.scaffold411_size250506.46	Lysine--tRNA ligase	EC:6.1.1.6	J	AT3G13490.1	Lysyl-tRNA_synthetase%2C_class_II
REFERENCE	evm.model.scaffold411_size250506.8	Branched-chain-amino-acid aminotransferase	EC:2.6.1.42	E	AT5G65780.1	branched-chain_amino_acid_aminotransferase_5_/_branched-chain_amino_acid_transaminase_5_(BCAT5)
REFERENCE	evm.model.scaffold411_size250506.7	Acyl-[acyl-carrier-protein] hydrolase	EC:2.3.1.85;EC:3.1.2.14	I	AT1G08510.1	fatty_acyl-ACP_thioesterases_B
REFERENCE	evm.model.scaffold408_size254463.51	Protein-tyrosine phosphatase-like	EC:3.1.3.16;EC:3.1.3.48;EC:2.7.7.27	S	AT3G62010.1	metal_ion-binding_protein
REFERENCE	evm.model.scaffold408_size254463.50	Protoporphyrinogen oxidase	EC:1.3.3.4	H	AT4G01690.1	Flavin_containing_amine_oxidoreductase_family
REFERENCE	evm.model.scaffold408_size254463.45	Pentatricopeptide repeat-containing protein, chloroplastic	EC:6.3.4.5	E	AT2G31400.1	s_uncoupled_1
REFERENCE	evm.model.scaffold408_size254463.35	Translocase of chloroplast	EC:7.4.2.3;EC:7.4.2.4;EC:3.6.1.15	F	AT5G05000.3	translocon_at_the_outer_envelope_membrane_of_chloroplasts_34
REFERENCE	evm.model.scaffold408_size254463.28	60S ribosomal protein L11	noEC	J	AT2G42740.1	ribosomal_protein_large_subunit_16A
REFERENCE	evm.model.scaffold408_size254463.12	GDT1 family protein	noEC	S	AT1G64150.1	Uncharacterized_protein_family_(UPF0016)
REFERENCE	evm.model.scaffold408_size254463.8	isoamylase 3, chloroplastic isoform X1	EC:3.2.1.68	G	AT4G09020.1	isoamylase_3
REFERENCE	evm.model.scaffold408_size254463.7	isoamylase 3, chloroplastic isoform X1	EC:3.2.1.68	G	AT4G09020.1	isoamylase_3
REFERENCE	evm.model.scaffold408_size254463.6	Isoamylase 3, chloroplastic	EC:3.2.1.68	G	AT4G09020.1	isoamylase_3
REFERENCE	evm.model.scaffold407_size254605.32	MLP-like protein 34-like	noEC	S	AT1G70830.5	MLP-like_protein_28
REFERENCE	evm.model.scaffold407_size254605.31	MLP-like protein 34-like	noEC	S	AT1G70850.3	MLP-like_protein_34
REFERENCE	evm.model.scaffold407_size254605.21	NADPH--cytochrome P450 reductase	EC:1.6.2.4	C	AT4G30210.1	P450_reductase_2
REFERENCE	evm.model.scaffold406_size255187.71	serine--tRNA ligase, chloroplastic/mitochondrial-like isoform X1	EC:6.1.1.11	J	AT1G11870.2	Seryl-tRNA_synthetase
REFERENCE	evm.model.scaffold406_size255187.67	Calnexin-like protein	noEC	O	AT5G61790.1	calnexin_1
REFERENCE	evm.model.scaffold406_size255187.59	DEAD-box ATP-dependent RNA helicase 31-like	EC:3.6.1.3;EC:3.6.4.13;EC:3.6.1.15	A	AT5G63630.2	P-loop_containing_nucleoside_triphosphate_hydrolases_superfamily_protein
REFERENCE	evm.model.scaffold405_size257100.6	Alpha-amylase	EC:3.2.1.1	G	AT1G69830.1	alpha-amylase-like_3
REFERENCE	evm.model.scaffold404_size257756.14	monogalactosyldiacylglycerol synthase 2, chloroplastic-like	EC:2.4.1.46	M	AT5G20410.1	monogalactosyldiacylglycerol_synthase_2
REFERENCE	evm.model.scaffold403_size258745.54	Chlorophyll a-b binding protein, chloroplastic	noEC	C	AT3G54890.1	chlorophyll_a-b_binding_protein_6
REFERENCE	evm.model.scaffold403_size258745.51	Serine/arginine repetitive matrix protein	noEC	none	AT4G25030.2	Serine/Threonine-kinase
REFERENCE	evm.model.scaffold403_size258745.45	ATPase ARSA1 isoform A	EC:3.6.3.16;EC:3.6.1.3;EC:3.6.1.15	P	AT3G10350.1	P-loop_containing_nucleoside_triphosphate_hydrolases_superfamily_protein
REFERENCE	evm.model.scaffold403_size258745.26	Putative aspartyl aminopeptidase	EC:3.4.11	E	AT5G04710.1	Zn-dependent_exopeptidases_superfamily_protein
REFERENCE	evm.model.scaffold403_size258745.24	ACT domain containing protein	noEC	S	AT5G04740.1	ACT_domain-containing_protein
REFERENCE	evm.model.scaffold403_size258745.15	Translation factor GUF1 homolog, chloroplastic	EC:3.6.1.15	J	AT5G08650.1	Small_GTP-binding_protein
REFERENCE	evm.model.scaffold403_size258745.7	Putative PDZ domain, Peptidase S1, PA clan, PDZ-like domain protein	noEC	O	AT3G03380.2	DegP_protease_7
REFERENCE	evm.model.scaffold402_size261414.64	Casein kinase II subunit alpha, chloroplastic	EC:2.7.11;EC:2.7.11.23	T	AT2G23070.1	Protein_kinase_superfamily_protein
REFERENCE	evm.model.scaffold402_size261414.49	Tryptophan synthase alpha chain	EC:4.2.1.20;EC:4.1.2.8	E	AT4G02610.1	Aldolase-type_TIM_barrel_family_protein
REFERENCE	evm.model.scaffold400_size262257.33	Trichohyalin like	noEC	none	AT1G50020.1	tubulin_alpha-6_chain
REFERENCE	evm.model.scaffold400_size262257.30	Peptide-methionine (R)-S-oxide reductase	EC:1.8.4.12	O	AT4G21860.4	methionine_sulfoxide_reductase_B_2
REFERENCE	evm.model.scaffold400_size262257.29	Glutamyl-tRNA reductase	EC:1.2.1.70	H	AT1G09940.1	Glutamyl-tRNA_reductase_family_protein
REFERENCE	evm.model.scaffold400_size262257.17	chaperone protein ClpB1	noEC	O	AT1G74310.1	heat_shock_protein_101
REFERENCE	evm.model.scaffold399_size263046.59	GDP-fucose protein O-fucosyltransferase	noEC	G	AT3G03810.2	O-fucosyltransferase_family_protein
REFERENCE	evm.model.scaffold399_size263046.23	30S ribosomal protein S13, chloroplastic	noEC	J	noTAIR	NULL
REFERENCE	evm.model.scaffold398_size264306.43	Transketolase, chloroplastic	EC:3.6.1.3;EC:2.2.1.2;EC:2.2.1.1;EC:3.6.1.15	G	AT3G60750.1	Transketolase
REFERENCE	evm.model.scaffold398_size264306.12	Glycine--tRNA ligase 2, chloroplastic/mitochondrial (Fragment)	EC:6.1.1.14	J	noTAIR	NULL
REFERENCE	evm.model.scaffold398_size264306.11	glycine--tRNA ligase, chloroplastic/mitochondrial 2 isoform X2	EC:6.1.1.14	J	AT3G48110.1	glycine-tRNA_ligase
REFERENCE	evm.model.scaffold398_size264306.8	RNA polymerase sigma factor	noEC	K	AT1G08540.1	RNApolymerase_sigma_subunit_2
REFERENCE	evm.model.scaffold398_size264306.6	50S ribosomal protein L3, chloroplastic	noEC	J	AT2G43030.1	Ribosomal_protein_L3_family_protein
REFERENCE	evm.model.scaffold398_size264306.4	Siroheme synthase	EC:4.99.1.4;EC:2.1.1.107;EC:4.99.1.1;EC:1.3.1.76	H	AT5G40850.1	urophorphyrin_methylase_1
REFERENCE	evm.model.scaffold397_size264925.40	fe-S cluster assembly factor HCF101, chloroplastic	noEC	D	AT3G24430.1	ATP_binding_protein
REFERENCE	evm.model.scaffold397_size264925.26	UPF0047 protein YjbQ-like	EC:2.5.1.3	S	AT1G21065.1	secondary_thiamine-phosphate_synthase_enzyme
REFERENCE	evm.model.scaffold397_size264925.1	Pentatricopeptide repeat-containing protein, chloroplastic	noEC	S	AT5G67570.1	Tetratricopeptide_repeat_(TPR)-like_superfamily_protein
REFERENCE	evm.model.scaffold396_size267761.27	MLP-like protein 34-like	noEC	S	AT1G70880.1	Polyketide_cyclase/dehydrase_and_lipid_transport_superfamily_protein
REFERENCE	evm.model.scaffold395_size268688.30	Zinc finger protein	noEC	S	AT1G70650.1	Ran_BP2/NZF_zinc_finger-like_superfamily_protein
REFERENCE	evm.model.scaffold395_size268688.25	3-ketoacyl-CoA thiolase 2, peroxisomal	EC:2.3.1.16	I	AT2G33150.1	peroxisomal_3-ketoacyl-CoA_thiolase_3
REFERENCE	evm.model.scaffold395_size268688.24	protein ECERIFERUM 26-like	noEC	S	AT4G13840.1	HXXXD-type_acyl-transferase_family_protein
REFERENCE	evm.model.scaffold395_size268688.2	inactive LRR receptor-like serine/threonine-protein kinase BIR2	EC:2.7.11	T	AT3G28450.1	Leucine-rich_repeat_protein_kinase_family_protein
REFERENCE	evm.model.scaffold394_size268910.54	Argininosuccinate synthase	EC:6.3.4.5	E	AT4G24830.1	arginosuccinate_synthase_family
REFERENCE	evm.model.scaffold394_size268910.38	Superoxide dismutase [fe] 2, chloroplastic	EC:1.15.1.1	P	AT5G51100.1	Fe_superoxide_dismutase_2
REFERENCE	evm.model.scaffold394_size268910.5	probable plastid-lipid-associated protein 8, chloroplastic	noEC	S	AT5G19940.1	Plastid-lipid_associated_protein_PAP_/_fibrillin_family_protein
REFERENCE	evm.model.scaffold394_size268910.4	Ferrochelatase	EC:4.99.1.1	H	AT5G26030.2	ferrochelatase_1
REFERENCE	evm.model.scaffold394_size268910.3	copper-transporting ATPase PAA2, chloroplastic	EC:7.2.2.9	P	AT5G21930.2	P-type_ATPase_of_Arabidopsis_2
REFERENCE	evm.model.scaffold393_size271938.78	Molecular chaperone (DnaJ superfamily)	noEC	O	AT2G42750.1	DNAJ_heat_shock_N-terminal_domain-containing_protein
REFERENCE	evm.model.scaffold393_size271938.61	ADP,ATP carrier protein 3, mitochondrial	noEC	C	AT4G28390.2	ADP/ATP_carrier_3
REFERENCE	evm.model.scaffold393_size271938.58	Histone H4	noEC	B	AT5G59970.2	Histone_superfamily_protein
REFERENCE	evm.model.scaffold393_size271938.49	30S ribosomal protein S10, chloroplastic	noEC	J	AT3G13120.3	Ribosomal_protein_S10p/S20e_family_protein
REFERENCE	evm.model.scaffold393_size271938.46	DUF21 domain-containing protein	noEC	S	AT1G55930.1	CBS_domain-containing_protein_/_transporter_associated_domain-containing_protein
REFERENCE	evm.model.scaffold393_size271938.42	mitochondrial import inner membrane translocase subunit TIM22-2-like	noEC	U	AT4G26670.1	Mitochondrial_import_inner_membrane_translocase_subunit_Tim17/Tim22/Tim23_family_protein
REFERENCE	evm.model.scaffold393_size271938.28	Aldo/keto reductase	EC:1.1.1.65	C	AT1G06690.1	NAD(P)-linked_oxidoreductase_superfamily_protein
REFERENCE	evm.model.scaffold391_size273082.42	nuclear pore complex protein NUP205 isoform X1	noEC	S	AT5G51200.1	nuclear_pore_complex_protein_(DUF3414)
REFERENCE	evm.model.scaffold391_size273082.16	Hybrid signal transduction histidine kinase M isoform X1	noEC	none	AT1G30475.3	hypothetical_protein
REFERENCE	evm.model.scaffold390_size273192.19	Cellular repressor of transcription	noEC	P	AT3G03890.1	FMN_binding_protein
REFERENCE	evm.model.scaffold390_size273192.7	cell division cycle 5-like protein	noEC	AD	AT1G09770.1	cell_division_cycle_5
REFERENCE	evm.model.scaffold390_size273192.4	cell division cycle 5-like protein	noEC	AD	AT1G09770.1	cell_division_cycle_5
REFERENCE	evm.model.scaffold388_size273501.71	DNA repair protein recA homolog 1, chloroplastic-like isoform X1	EC:3.6.1.3;EC:7.2.2.10;EC:3.6.1.8;EC:3.6.1.19;EC:3.6.1.15	L	AT1G79050.1	recA_DNA_recombination_family_protein
TEST	evm.model.scaffold388_size273501.51	Putative ovule protein	noEC	S	AT5G41620.1	intracellular_protein_transporter_USO1-like_protein
TEST	evm.model.scaffold388_size273501.49	2-C-methyl-D-erythritol 2,4-cyclodiphosphate synthase	EC:4.6.1.12	H	AT1G63970.1	isoprenoid_F
TEST	evm.model.scaffold388_size273501.30	30S ribosomal protein S17, chloroplastic	noEC	J	AT1G79850.1	ribosomal_protein_S17
TEST	evm.model.scaffold388_size273501.25	50S ribosomal protein L10, chloroplastic	noEC	J	AT5G13510.1	Ribosomal_protein_L10_family_protein
REFERENCE	evm.model.scaffold388_size273501.19	mitochondrial substrate carrier family protein C-like	noEC	C	AT2G35800.1	mitochondrial_substrate_carrier_family_protein
REFERENCE	evm.model.scaffold388_size273501.17	Ammonium transporter 1 member 2	noEC	none	AT5G37360.1	LOW_protein:_ammonium_transporter_1-like_protein
REFERENCE	evm.model.scaffold388_size273501.9	Protein TIC 20-II, chloroplastic	noEC	S	AT2G47840.1	Uncharacterized_conserved_protein_ycf60
REFERENCE	evm.model.scaffold388_size273501.1	Dihydrolipoamide acetyltransferase component of pyruvate dehydrogenase complex	EC:2.3.1.38;EC:2.3.1.12	C	AT3G25860.1	2-oxoacid_dehydrogenases_acyltransferase_family_protein
REFERENCE	evm.model.scaffold387_size273758.27	Actin/actin-like conserved site-containing protein	noEC	Z	AT3G12110.1	actin-11
REFERENCE	evm.model.scaffold387_size273758.4	mitochondrial phosphate carrier protein 3, mitochondrial-like	noEC	C	AT5G14040.1	phosphate_transporter_3%3B1
REFERENCE	evm.model.scaffold385_size274724.46	Kirola like	noEC	S	AT1G70880.1	Polyketide_cyclase/dehydrase_and_lipid_transport_superfamily_protein
REFERENCE	evm.model.scaffold385_size274724.38	Kirola like	noEC	S	noTAIR	NULL
REFERENCE	evm.model.scaffold384_size274972.45	Amino acid/polyamine transporter I	noEC	E	AT1G05940.1	cationic_amino_acid_transporter_9
REFERENCE	evm.model.scaffold383_size275080.43	3-oxoacyl-[acyl-carrier-protein] synthase II, chloroplastic-like	EC:2.3.1.85;EC:2.3.1.41;EC:2.3.1.179	IQ	AT1G74960.3	fatty_acid_biosynthesis_1
REFERENCE	evm.model.scaffold383_size275080.8	Nuclear pore complex protein nup133	noEC	S	AT2G05120.1	Nucleoporin%2C_Nup133/Nup155-like_protein
REFERENCE	evm.model.scaffold383_size275080.3	uncharacterized RNA pseudouridine synthase aq_1464-like	EC:5.4.99.24;EC:5.4.99.23;EC:5.4.99.19;EC:5.4.99.29;EC:5.4.99.20;EC:5.4.99.22;EC:5.4.99.21;EC:5.4.99.43	J	AT2G39140.1	pseudouridine_synthase_family_protein
REFERENCE	evm.model.scaffold382_size276227.15	Transcription factor	noEC	S	AT2G01370.1	DNA-binding_storekeeper_protein-related_transcriptional_regulator
REFERENCE	evm.model.scaffold382_size276227.1	CDP-diacylglycerol--glycerol-3-phosphate 3-phosphatidyltransferase	EC:2.7.8.5	I	AT2G39290.1	phosphatidylglycerolphosphate_synthase_1
TEST	evm.model.scaffold381_size276415.15	U2 small nuclear ribonucleoprotein A	noEC	A	AT1G09760.1	U2_small_nuclear_ribonucleoprotein_A
REFERENCE	evm.model.scaffold379_size277413.46	probable L-ascorbate peroxidase 6, chloroplastic isoform X1	EC:1.11.1.5;EC:1.11.1.7;EC:1.11.1.11	E	AT1G77490.1	thylakoidal_ascorbate_peroxidase
REFERENCE	evm.model.scaffold379_size277413.21	endoplasmin homolog	EC:3.6.1.3;EC:3.6.1.15	O	AT4G24190.1	Chaperone_protein_htpG_family_protein
REFERENCE	evm.model.scaffold379_size277413.19	Localized to the inner membrane of the chloroplast	noEC	none	AT1G42960.1	inner_membrane_localized_protein
REFERENCE	evm.model.scaffold379_size277413.8	probable beta-D-xylosidase 7	EC:3.2.1.21;EC:3.2.1.55;EC:3.2.1.37	G	AT1G78060.1	Glycosyl_hydrolase_family_protein
REFERENCE	evm.model.scaffold378_size277705.50	D-3-phosphoglycerate dehydrogenase	noEC	E	AT1G17745.2	D-3-phosphoglycerate_dehydrogenase
REFERENCE	evm.model.scaffold378_size277705.14	6-phosphogluconate dehydrogenase, decarboxylating	EC:1.1.1.43;EC:1.1.1.44	G	AT1G64190.1	6-phosphogluconate_dehydrogenase_family_protein
TEST	evm.model.scaffold378_size277705.11	plastidal glycolate/glycerate translocator 1, chloroplastic	noEC	M	AT1G32080.1	membrane_protein
REFERENCE	evm.model.scaffold377_size278145.45	Glutamyl-tRNA reductase	EC:1.2.1.70	H	AT1G58290.1	Glutamyl-tRNA_reductase_family_protein
TEST	evm.model.scaffold377_size278145.36	Protein plastid transcriptionally active 12	noEC	S	AT2G34640.1	plastid_transcriptionally_active_12
REFERENCE	evm.model.scaffold376_size278392.22	serine/threonine-protein kinase CDL1-like	EC:2.7.11	T	AT1G20650.1	Protein_kinase_superfamily_protein
REFERENCE	evm.model.scaffold375_size279719.60	Beta-glucosidase 40-like	EC:3.2.1.21;EC:3.2.1.23;EC:3.2.1.39;EC:3.2.1.38	G	AT1G26560.1	beta_glucosidase_40
REFERENCE	evm.model.scaffold375_size279719.30	Glutathione peroxidase	EC:1.11.1.9;EC:1.11.1.7	O	AT4G11600.1	glutathione_peroxidase_6
REFERENCE	evm.model.scaffold374_size280266.53	Rhodanese-like domain-containing protein 11, chloroplastic	noEC	S	AT4G24750.1	Rhodanese/Cell_cycle_control_phosphatase_superfamily_protein
REFERENCE	evm.model.scaffold374_size280266.52	Quinolinate synthase, chloroplastic	noEC	H	AT5G50210.1	quinolinate_synthase
TEST	evm.model.scaffold374_size280266.46	probable plastid-lipid-associated protein 4, chloroplastic	noEC	S	AT3G26070.1	Plastid-lipid_associated_protein_PAP_/_fibrillin_family_protein
REFERENCE	evm.model.scaffold374_size280266.7	zinc finger protein VAR3, chloroplastic	noEC	S	AT1G48570.1	zinc_finger_(Ran-binding)_family_protein
REFERENCE	evm.model.scaffold374_size280266.2	Carotenoid cleavage dioxygenase 1	EC:1.13.11;EC:1.13.11.51	Q	AT3G63520.1	carotenoid_cleavage_dioxygenase_1
REFERENCE	evm.model.scaffold373_size281293.59	plastidial lipoyltransferase 2	EC:2.3.1.181	CH	AT1G47578.1	Biotin/lipoate_A/B_protein_ligase_family
REFERENCE	evm.model.scaffold373_size281293.57	Thylakoidal processing peptidase 1, chloroplastic-like	noEC	O	AT2G30440.1	thylakoid_processing_peptide
TEST	evm.model.scaffold373_size281293.41	protein TIC 56, chloroplastic-like	noEC	S	AT5G01590.1	histone-lysine_N-methyltransferase_ATXR3-like_protein
REFERENCE	evm.model.scaffold373_size281293.4	Pentatricopeptide repeat-containing protein, chloroplastic	noEC	S	AT4G16390.1	pentatricopeptide_(PPR)_repeat-containing_protein
REFERENCE	evm.model.scaffold372_size281874.51	Clathrin heavy chain	noEC	U	AT3G11130.1	Clathrin%2C_heavy_chain
TEST	evm.model.scaffold372_size281874.45	UTP--glucose-1-phosphate uridylyltransferase 3, chloroplastic-like	EC:2.7.7.23;EC:2.7.7.64;EC:2.7.7.9	S	AT3G56040.1	UDP-glucose_pyrophosphorylase_3
REFERENCE	evm.model.scaffold371_size285767.19	Ran GTPase-activating protein 2	noEC	ATY	AT3G63130.2	RAN_GTPase_activating_protein_1
REFERENCE	evm.model.scaffold371_size285767.17	Ran GTPase activating protein 2	noEC	ATY	AT3G63130.2	RAN_GTPase_activating_protein_1
REFERENCE	evm.model.scaffold371_size285767.13	Thiamine biosynthesis protein ThiC	EC:3.6.1.21	H	AT2G29630.4	thiaminC
REFERENCE	evm.model.scaffold371_size285767.9	Leucine aminopeptidase 2, chloroplastic	EC:3.4.11;EC:3.4.13	E	AT2G24200.2	Cytosol_aminopeptidase_family_protein
REFERENCE	evm.model.scaffold371_size285767.8	lactation elevated protein 1	EC:3.6.1.3;EC:3.6.1.15;EC:2.7.1.1	S	AT4G30490.1	AFG1-like_ATPase_family_protein
REFERENCE	evm.model.scaffold370_size285785.70	probable inactive ATP-dependent zinc metalloprotease FTSHI 3, chloroplastic	EC:3.4.24;EC:3.6.1.3;EC:3.6.1.15	O	AT3G02450.1	cell_division_protein_ftsH
REFERENCE	evm.model.scaffold369_size285830.64	Alpha-glucan water dikinase, chloroplastic	EC:2.7.9.4	S	noTAIR	NULL
REFERENCE	evm.model.scaffold369_size285830.63	alpha-glucan water dikinase, chloroplastic	EC:2.7.13.3;EC:2.7.9.4	S	noTAIR	NULL
REFERENCE	evm.model.scaffold369_size285830.61	Alpha-glucan water dikinase, chloroplastic	EC:2.7.9.4	G	AT1G10760.3	Pyruvate_phosphate_dikinase%2C_PEP/pyruvate_binding_domain-containing_protein
REFERENCE	evm.model.scaffold369_size285830.59	Alpha-glucan water dikinase, chloroplastic	EC:2.7.9.4	G	AT1G10760.3	Pyruvate_phosphate_dikinase%2C_PEP/pyruvate_binding_domain-containing_protein
REFERENCE	evm.model.scaffold369_size285830.57	Pyruvate, phosphate dikinase	EC:2.7.9.4	G	noTAIR	NULL
REFERENCE	evm.model.scaffold369_size285830.23	Adenosine kinase 2	EC:2.7.1.20	G	AT5G03300.1	adenosine_kinase_2
REFERENCE	evm.model.scaffold368_size285942.80	Eukaryotic translation initiation factor 3 subunit C like	noEC	none	AT3G32930.2	6%2C7-dimethyl-8-ribityllumazine_synthase
REFERENCE	evm.model.scaffold368_size285942.72	probable aquaporin TIP1-1	noEC	G	AT2G36830.1	gamma_tonoplast_intrinsic_protein
REFERENCE	evm.model.scaffold368_size285942.41	Phytochromobilin:ferredoxin oxidoreductase, chloroplastic-like	EC:1.3.7.4	S	AT3G09150.2	phytochromobilin:ferredoxin_oxidoreductase%2C_chloroplast_/_phytochromobilin_synthase_(HY2)
REFERENCE	evm.model.scaffold367_size287238.56	17.8 kDa class I heat shock protein-like	noEC	O	AT1G07400.1	HSP20-like_chaperones_superfamily_protein
REFERENCE	evm.model.scaffold366_size288142.48	Peptide methionine sulfoxide reductase	EC:1.8.4.13;EC:1.8.4.11	O	AT4G25130.1	peptide_met_sulfoxide_reductase_4
REFERENCE	evm.model.scaffold366_size288142.47	protein mago nashi homolog	noEC	A	AT1G02140.1	mago_nashi_family_protein
REFERENCE	evm.model.scaffold366_size288142.19	sec-independent protein translocase protein TATB, chloroplastic-like isoform X4	EC:7.4.2.3;EC:7.4.2.4	U	AT5G52440.1	Bacterial_sec-independent_translocation_protein_mttA/Hcf106
REFERENCE	evm.model.scaffold366_size288142.13	Keratin-associated protein 5-4	noEC	S	AT5G52540.1	keratin-associated_protein%2C_putative_(DUF819)
REFERENCE	evm.model.scaffold366_size288142.3	RNA polymerase sigma factor sigE, chloroplastic/mitochondrial-like	noEC	K	AT5G24120.3	sigma_factor_E
REFERENCE	evm.model.scaffold365_size288368.46	Translation initiation factor IF-3	noEC	J	AT4G30690.2	Translation_initiation_factor_3_protein
REFERENCE	evm.model.scaffold364_size288414.2	Ammonium transporter 1 member 2	noEC	none	AT5G37360.1	LOW_protein:_ammonium_transporter_1-like_protein
REFERENCE	evm.model.scaffold363_size289583.80	V-type proton ATPase subunit a	EC:7.1.3.1;EC:3.6.1.3;EC:7.1.2.1;EC:3.6.4.12;EC:3.6.1.15	P	AT4G39080.1	vacuolar_proton_ATPase_A3
REFERENCE	evm.model.scaffold363_size289583.75	probable alkaline/neutral invertase B	EC:3.2.1.20;EC:3.2.1.97;EC:3.2.1.26;EC:3.2.1.48	S	AT4G34860.3	Plant_neutral_invertase_family_protein
REFERENCE	evm.model.scaffold363_size289583.62	Rho GTPase-activating protein 7	noEC	T	AT5G19390.2	Rho_GTPase_activation_protein_(RhoGAP)_with_PH_domain-containing_protein
REFERENCE	evm.model.scaffold363_size289583.59	Serrate RNA effector molecule	noEC	A	AT2G27100.1	C2H2_zinc-finger_protein_SERRATE_(SE)
REFERENCE	evm.model.scaffold362_size289980.65	Peptidylprolyl isomerase	EC:5.2.1.8	O	AT5G45680.1	FK506-binding_protein_13
TEST	evm.model.scaffold362_size289980.53	Udp-sulfoquinovose synthase, chloroplastic	EC:3.13.1.1	M	AT4G33030.1	sulfoquinovosyldiacylglycerol_1
REFERENCE	evm.model.scaffold362_size289980.39	Nucleoside diphosphate kinase	EC:2.7.4.6	F	AT4G23900.1	Nucleoside_diphosphate_kinase_family_protein
REFERENCE	evm.model.scaffold362_size289980.36	Abc transporter b family member 25, mitochondrial	EC:7.2.2.2;EC:3.6.1.3;EC:7.6.2.2;EC:3.6.1.15	Q	AT5G58270.1	ABC_transporter_of_the_mitochondrion_3
REFERENCE	evm.model.scaffold362_size289980.34	6-phosphogluconate dehydrogenase, decarboxylating	EC:1.1.1.43;EC:1.1.1.44	G	AT1G64190.1	6-phosphogluconate_dehydrogenase_family_protein
REFERENCE	evm.model.scaffold362_size289980.29	6-phosphogluconate dehydrogenase, decarboxylating	EC:1.1.1.43;EC:1.1.1.44	G	AT5G41670.4	6-phosphogluconate_dehydrogenase_family_protein
REFERENCE	evm.model.scaffold362_size289980.27	6-phosphogluconate dehydrogenase, decarboxylating	EC:1.1.1.43;EC:1.1.1.44	G	AT5G41670.4	6-phosphogluconate_dehydrogenase_family_protein
REFERENCE	evm.model.scaffold362_size289980.26	Putative CAAX amino terminal protease family protein-like (Fragment)	noEC	S	AT5G60750.1	CAAX_amino_terminal_protease_family_protein
REFERENCE	evm.model.scaffold362_size289980.12	Early nodulin-like protein	noEC	S	AT1G79800.1	early_nodulin-like_protein_7
REFERENCE	evm.model.scaffold362_size289980.7	60S ribosomal protein L28-1-like	noEC	J	AT4G29410.2	Ribosomal_L28e_protein_family
REFERENCE	evm.model.scaffold361_size292200.51	Shikimate kinase	EC:2.7.1.71	E	AT3G26900.3	shikimate_kinase_like_1
REFERENCE	evm.model.scaffold361_size292200.29	fatty acid hydroperoxide lyase, chloroplastic	noEC	Q	AT5G42650.1	allene_oxide_synthase
REFERENCE	evm.model.scaffold358_size295937.74	28 kDa ribonucleoprotein, chloroplastic-like	noEC	A	AT5G50250.1	chloroplast_RNA-binding_protein_31B
REFERENCE	evm.model.scaffold358_size295937.31	Cytochrome b6-f complex iron-sulfur subunit	EC:1.10.9;EC:1.10.2;EC:1.10.9.1;EC:1.10.2.2	C	AT4G03280.1	photosynthetic_electron_transfer_C
REFERENCE	evm.model.scaffold357_size296716.104	Bifunctional protein FolD 2	EC:3.5.4.9;EC:1.5.1.5	H	AT3G12290.1	Amino_acid_dehydrogenase_family_protein
REFERENCE	evm.model.scaffold357_size296716.94	protein LOW PSII ACCUMULATION 3, chloroplastic isoform X2	noEC	S	AT5G48790.1	LOW_PSII_ACCUMULATION_protein_(DUF1995)
REFERENCE	evm.model.scaffold357_size296716.85	Plastocyanin	noEC	C	AT1G76100.1	plastocyanin_1
REFERENCE	evm.model.scaffold355_size298094.62	ATP synthase gamma chain, chloroplastic	noEC	C	AT4G04640.1	ATPase%2C_F1_complex%2C_gamma_subunit_protein
REFERENCE	evm.model.scaffold355_size298094.10	Mitochodrial transcription termination factor	noEC	K	AT5G55580.2	Mitochondrial_transcription_termination_factor_family_protein
REFERENCE	evm.model.scaffold354_size300507.42	30S ribosomal protein 2, chloroplastic	noEC	A	AT3G52150.2	RNA-binding_(RRM/RBD/RNP_motifs)_family_protein
REFERENCE	evm.model.scaffold352_size303969.45	Putative monogalactosyldiacylglycerol synthase, chloroplastic	EC:2.4.1.46	M	AT4G31780.2	monogalactosyl_diacylglycerol_synthase_1
REFERENCE	evm.model.scaffold352_size303969.26	Pentatricopeptide repeat-containing protein	noEC	S	AT4G19220.1	Tetratricopeptide_repeat_(TPR)-like_superfamily_protein
REFERENCE	evm.model.scaffold351_size304134.97	Wd-40 repeat-containing protein msi1	noEC	B	AT5G58230.1	Transducin/WD40_repeat-like_superfamily_protein
REFERENCE	evm.model.scaffold351_size304134.89	Tropomyosin like	noEC	none	AT3G15095.1	Serine/Threonine-kinase_pakA-like_protein
REFERENCE	evm.model.scaffold351_size304134.78	Mitochondrial carrier domain-containing protein	noEC	C	AT5G19760.1	Mitochondrial_substrate_carrier_family_protein
REFERENCE	evm.model.scaffold351_size304134.75	RuBisCO large subunit-binding protein subunit beta, chloroplastic	noEC	O	AT1G55490.5	chaperonin_60_beta
REFERENCE	evm.model.scaffold351_size304134.22	40S ribosomal protein SA	noEC	J	AT3G04770.2	40s_ribosomal_protein_SA_B
REFERENCE	evm.model.scaffold351_size304134.20	Protein HHL1, chloroplastic	EC:3.4.24	O	AT1G67700.4	multidrug_resistance_protein
REFERENCE	evm.model.scaffold351_size304134.10	UPF0047 protein YjbQ	EC:2.5.1.3	S	AT1G21065.1	secondary_thiamine-phosphate_synthase_enzyme
REFERENCE	evm.model.scaffold350_size304998.65	Atp-dependent zinc metalloprotease ftsh 2, chloroplastic	EC:3.4.24;EC:3.6.1.3;EC:3.6.1.15;EC:3.6.4.3	O	AT2G30950.4	FtsH_extracellular_protease_family
REFERENCE	evm.model.scaffold350_size304998.51	dihydroorotase, mitochondrial-like isoform X1	EC:3.5.2.3	F	AT4G22930.2	pyrimidin_4
REFERENCE	evm.model.scaffold350_size304998.41	Nuclear pore complex protein nup133	noEC	S	AT2G05120.1	Nucleoporin%2C_Nup133/Nup155-like_protein
REFERENCE	evm.model.scaffold350_size304998.38	Nuclear pore complex protein	noEC	S	AT2G05120.2	Nucleoporin%2C_Nup133/Nup155-like_protein
REFERENCE	evm.model.scaffold350_size304998.31	uncharacterized RNA pseudouridine synthase aq_1464-like	EC:5.4.99.24;EC:5.4.99.23;EC:5.4.99.19;EC:5.4.99.29;EC:5.4.99.20;EC:5.4.99.22;EC:5.4.99.21;EC:5.4.99.43	J	AT2G39140.1	pseudouridine_synthase_family_protein
REFERENCE	evm.model.scaffold350_size304998.18	Ribosomal protein L9	noEC	J	AT3G44890.1	ribosomal_protein_L9
REFERENCE	evm.model.scaffold348_size306083.78	Adenylate kinase	EC:2.7.4.4;EC:2.7.4.3	F	AT5G35170.1	adenylate_kinase_family_protein
REFERENCE	evm.model.scaffold348_size306083.36	thioredoxin-like 2, chloroplastic	EC:3.5.1.52	O	AT4G29670.1	atypical_CYS_HIS_rich_thioredoxin_2
REFERENCE	evm.model.scaffold347_size306357.60	probable protein phosphatase 2C 26 isoform X2	EC:3.1.3.16	T	AT2G30170.1	Protein_phosphatase_2C_family_protein
REFERENCE	evm.model.scaffold347_size306357.2	Dexh-box atp-dependent rna helicase dexh15 chloroplastic	EC:3.6.1.3;EC:3.6.4.13;EC:3.6.1.15	A	AT1G70070.1	DEAD/DEAH_box_helicase
REFERENCE	evm.model.scaffold345_size313805.34	14-3-3 protein	noEC	O	AT5G38480.1	general_regulatory_factor_3
REFERENCE	evm.model.scaffold345_size313805.33	14-3-3 protein	noEC	DZ	AT5G38480.1	general_regulatory_factor_3
REFERENCE	evm.model.scaffold345_size313805.26	triose phosphate/phosphate translocator, non-green plastid, chloroplastic-like	noEC	EG	AT5G33320.1	Glucose-6-phosphate/phosphate_translocator-like_protein
REFERENCE	evm.model.scaffold345_size313805.5	Protein DETOXIFICATION	noEC	V	AT4G38380.5	MATE_efflux_family_protein
REFERENCE	evm.model.scaffold344_size316065.50	DEAD-box ATP-dependent RNA helicase 22	EC:3.6.1.3;EC:3.6.4.13;EC:3.6.1.15	A	AT1G59990.2	DEA(D/H)-box_RNA_helicase_family_protein
REFERENCE	evm.model.scaffold344_size316065.45	Splicing factor 3b, subunit 4	noEC	A	AT2G37220.1	RNA-binding_(RRM/RBD/RNP_motifs)_family_protein
REFERENCE	evm.model.scaffold344_size316065.43	Heme-binding-like protein, chloroplastic	noEC	S	AT3G10130.1	SOUL_heme-binding_family_protein
REFERENCE	evm.model.scaffold343_size316294.85	EG2771	noEC	S	AT5G14910.2	Heavy_metal_transport/detoxification_superfamily_protein
REFERENCE	evm.model.scaffold343_size316294.84	EG2771	noEC	S	AT5G14910.2	Heavy_metal_transport/detoxification_superfamily_protein
REFERENCE	evm.model.scaffold342_size317645.60	Pentatricopeptide repeat-containing protein	noEC	S	AT1G02150.1	Tetratricopeptide_repeat_(TPR)-like_superfamily_protein
REFERENCE	evm.model.scaffold342_size317645.58	Ent-kaurene synthase	EC:4.2.3.19	S	AT1G79460.1	Terpenoid_cyclases/Protein_prenyltransferases_superfamily_protein
REFERENCE	evm.model.scaffold342_size317645.57	Ent-kaurene synthase	EC:4.2.3.19	S	AT1G79460.1	Terpenoid_cyclases/Protein_prenyltransferases_superfamily_protein
REFERENCE	evm.model.scaffold342_size317645.56	ABC transporter D family member 2, chloroplastic	EC:3.6.1.3;EC:3.6.3.47;EC:7.6.2.2;EC:3.6.1.15	I	AT1G54350.1	ABC_transporter_family_protein
REFERENCE	evm.model.scaffold342_size317645.32	indole-3-acetic acid-amido synthetase GH3.6	noEC	S	AT5G54510.1	Auxin-responsive_GH3_family_protein
REFERENCE	evm.model.scaffold342_size317645.10	protein TPX2	noEC	S	AT1G03780.2	targeting_protein_for_XKLP2
REFERENCE	evm.model.scaffold341_size317742.28	40S ribosomal protein S3a	noEC	J	AT3G04840.1	Ribosomal_protein_S3Ae
TEST	evm.model.scaffold340_size317973.64	3-phosphoshikimate 1-carboxyvinyltransferase	EC:2.5.1.19	E	AT2G45300.4	RNA_3-terminal_phosphate_cyclase/enolpyruvate_transferase%2C_alpha/beta
REFERENCE	evm.model.scaffold339_size318728.91	protein TIC 22-like, chloroplastic	noEC	S	AT3G23710.1	Tic22-like_family_protein
REFERENCE	evm.model.scaffold339_size318728.88	CSC1-like protein ERD4	noEC	S	AT1G30360.1	Early-responsive_to_dehydration_stress_protein_(ERD4)
REFERENCE	evm.model.scaffold339_size318728.54	Putative gtp diphosphokinase rsh3, chloroplastic	EC:2.7.6.5;EC:3.1.7.2	T	AT3G14050.1	RELA/SPOT_homolog_2
REFERENCE	evm.model.scaffold339_size318728.17	OTU domain-containing protein At3g57810	EC:3.4.19.12	O	AT3G57810.4	Cysteine_proteinases_superfamily_protein
REFERENCE	evm.model.scaffold338_size319425.59	Adenylate kinase	EC:2.7.4.4;EC:2.7.4.3	F	AT2G37250.1	adenosine_kinase
REFERENCE	evm.model.scaffold338_size319425.56	interactor of constitutive active ROPs 2, chloroplastic-like isoform X1	noEC	S	AT2G37080.3	ROP_interactive_partner_3
REFERENCE	evm.model.scaffold338_size319425.55	Valine--tRNA ligase (Fragment)	EC:6.1.1.9;EC:3.1.1.1	J	AT1G14610.1	valyl-tRNA_synthetase_/_valine-tRNA_ligase_(VALRS)
REFERENCE	evm.model.scaffold338_size319425.54	Valine--tRNA ligase, mitochondrial 1	EC:6.1.1.9;EC:3.1.1.1	J	AT1G14610.1	valyl-tRNA_synthetase_/_valine-tRNA_ligase_(VALRS)
[truncated: 5,571 more rows]

## Sheet: Ugibba SINGLETONS
Tags	GO ID	GO Name	GO Category	FDR	P-Value	Nr Test	Nr Reference	Non Annot Test	Non Annot Reference
[OVER]	GO:0019825	oxygen binding	MOLECULAR_FUNCTION	0.04239006601613082	0.009832747271782924	3	1	2485	15271
TEST	evm.model.Ug_unitig_578.91	Purine-uracil permease NCS1	noEC	FH	AT5G03555.1	permease%2C_cytosine/purines%2C_uracil%2C_thiamine%2C_allantoin_family_protein
TEST	evm.model.Ug_unitig_0.2471	Truncated hemoglobin	noEC	S	AT4G32690.1	hemoglobin_3
TEST	evm.model.Ug_unitig_0.60	Non-symbiotic hemoglobin 1	noEC	C	AT2G16060.1	hemoglobin_1
REFERENCE	evm.model.Ug_unitig_22.1450	Allene oxide synthase	EC:4.2.1.92	Q	AT5G42650.1	allene_oxide_synthase
[OVER]	GO:0016043	cellular component organization	BIOLOGICAL_PROCESS	1.4678028740565075E-7	1.891498549041891E-8	496	2358	1992	12914
REFERENCE	evm.model.Ug_unitig_899.1154	DNA gyrase subunit B	EC:3.6.1.3;EC:5.99.1.3;EC:3.6.1.15	B	AT5G04130.1	DNA_GYRASE_B2
REFERENCE	evm.model.Ug_unitig_899.1153	Cysteine alpha-hairpin motif superfamily	noEC	S	AT5G09570.1	Cox19-like_CHCH_family_protein
REFERENCE	evm.model.Ug_unitig_899.1145	Bet1-like snare 1-2	noEC	U	AT4G14455.1	Target_SNARE_coiled-coil_domain_protein
REFERENCE	evm.model.Ug_unitig_899.1144	Endoglucanase	EC:3.2.1.4	G	AT1G70710.1	glycosyl_hydrolase_9B1
REFERENCE	evm.model.Ug_unitig_899.1142	HMG-Y-related protein A	noEC	B	AT1G14900.1	high_mobility_group_A
REFERENCE	evm.model.Ug_unitig_899.1134	Non-specific serine/threonine protein kinase	EC:2.7.11	T	AT5G09890.1	Protein_kinase_family_protein
TEST	evm.model.Ug_unitig_899.1129	leishmanolysin homolog	EC:3.4.24	MTVW	AT5G42620.2	metalloendopeptidase_/_zinc_ion_binding_protein
REFERENCE	evm.model.Ug_unitig_899.1122	ubiquitin domain-containing protein DSK2a-like	noEC	O	AT2G17200.1	ubiquitin_family_protein
REFERENCE	evm.model.Ug_unitig_899.1114	Tetraketide alpha-pyrone reductase 1	EC:1.1.1.219	V	AT4G35420.1	dihydroflavonol_4-reductase-like1
TEST	evm.model.Ug_unitig_899.1112	Epimerase family protein SDR39U1-like protein, chloroplastic	noEC	F	AT2G21280.1	NAD(P)-binding_Rossmann-fold_superfamily_protein
REFERENCE	evm.model.Ug_unitig_899.1106	Conserved oligomeric Golgi complex subunit 4	noEC	U	AT4G01395.1	conserved_oligomeric_Golgi_complex_subunit_4
REFERENCE	evm.model.Ug_unitig_899.1105	Rapid alkalinization factor	noEC	S	AT4G15800.1	ralf-like_33
REFERENCE	evm.model.Ug_unitig_899.1097	dof zinc finger protein DOF3.4	noEC	B	AT3G50410.1	OBF_binding_protein_1
REFERENCE	evm.model.Ug_unitig_899.1086	Signal recognition particle 43 kDa protein, chloroplastic	noEC	S	AT2G47450.1	chloroplast_signal_recognition_particle_component_(CAO)
REFERENCE	evm.model.Ug_unitig_899.1085	Putative LOV domain-containing protein	EC:2.7.11	T	AT5G58140.7	phototropin_2
REFERENCE	evm.model.Ug_unitig_899.1083	AAA+ ATPase domain-containing protein	EC:3.6.1.3;EC:3.6.1.15	O	AT3G15120.2	P-loop_containing_nucleoside_triphosphate_hydrolases_superfamily_protein
TEST	evm.model.Ug_unitig_899.1080	Embryo defective 2737	noEC	none	AT5G53860.2	embryo_defective_2737
REFERENCE	evm.model.Ug_unitig_899.1072	myosin-2-like isoform X1	EC:3.6.1.3;EC:3.6.1.15	Z	AT1G50360.1	P-loop_containing_nucleoside_triphosphate_hydrolases_superfamily_protein
REFERENCE	evm.model.Ug_unitig_899.1070	beta-glucuronosyltransferase GlcAT14A-like	noEC	G	noTAIR	NULL
REFERENCE	evm.model.Ug_unitig_899.1069	Histone-lysine N-methyltransferase family member SUVH9-like	EC:2.1.1.43	B	AT4G13460.2	SU(VAR)3-9_homolog_9
REFERENCE	evm.model.Ug_unitig_899.1042	Structural maintenance of chromosomes protein	noEC	BD	AT5G48600.2	structural_maintenance_of_chromosome_3
TEST	evm.model.Ug_unitig_899.1039	ribosome-recycling factor, chloroplastic-like	noEC	J	AT3G63190.1	ribosome_recycling_factor%2C_chloroplast_precursor
REFERENCE	evm.model.Ug_unitig_899.1033	ABC transporter B family member 19	EC:3.6.1.3;EC:7.6.2.2;EC:3.6.1.15	Q	AT3G28860.1	ATP_binding_cassette_subfamily_B19
REFERENCE	evm.model.Ug_unitig_899.1032	Transcription factor PRE5	noEC	K	AT3G28857.1	basic_helix-loop-helix_(bHLH)_DNA-binding_family_protein
REFERENCE	evm.model.Ug_unitig_899.1025	beta-glucuronosyltransferase GlcAT14B-like	EC:2.4.2.26;EC:2.4.1.17	G	AT5G15050.1	Core-2/I-branching_beta-1%2C6-N-acetylglucosaminyltransferase_family_protein
REFERENCE	evm.model.Ug_unitig_899.1008	Phospholipid-transporting ATPase	EC:3.6.1.3;EC:7.6.2.1;EC:3.6.1.15	P	AT3G27870.1	ATPase_E1-E2_type_family_protein_/_haloacid_dehalogenase-like_hydrolase_family_protein
REFERENCE	evm.model.Ug_unitig_899.1006	Putative plastid-lipid-associated protein 14, chloroplastic	EC:2.7.11;EC:2.7.11.22	G	AT5G53450.1	OBP3-responsive_protein_1
REFERENCE	evm.model.Ug_unitig_899.987	Translation initiation factor IF-3	noEC	J	AT2G24060.1	Translation_initiation_factor_3_protein
REFERENCE	evm.model.Ug_unitig_899.979	Cytosolic Fe-S cluster assembly factor NBP35	noEC	D	AT5G50960.1	nucleotide_binding_protein_35
TEST	evm.model.Ug_unitig_899.978	Cytosolic Fe-S cluster assembly factor NBP35	noEC	D	AT5G50960.1	nucleotide_binding_protein_35
REFERENCE	evm.model.Ug_unitig_899.964	Putative clathrin assembly protein	noEC	TU	AT4G32285.2	ENTH/ANTH/VHS_superfamily_protein
TEST	evm.model.Ug_unitig_899.960	3-isopropylmalate dehydratase small subunit 3-like	EC:4.2.1.33	E	AT2G43090.1	Aconitase/3-isopropylmalate_dehydratase_protein
REFERENCE	evm.model.Ug_unitig_899.957	DNA mismatch repair protein MSH7 isoform X1	EC:3.6.1.3;EC:3.6.1.15	L	AT3G24495.1	MUTS_homolog_7
REFERENCE	evm.model.Ug_unitig_899.956	inner membrane protein PPF-1, chloroplastic	noEC	OU	AT2G28800.1	63_kDa_inner_membrane_family_protein
TEST	evm.model.Ug_unitig_899.952	golgin candidate 1-like isoform X2	noEC	S	AT2G19950.2	golgin_Putative_1
REFERENCE	evm.model.Ug_unitig_899.948	Kinesin-like protein	EC:3.6.1.3;EC:3.6.1.15;EC:3.6.4.4	Z	AT1G20060.9	ATP_binding_microtubule_motor_family_protein
REFERENCE	evm.model.Ug_unitig_899.947	Kinesin-like protein	EC:3.6.1.3;EC:3.6.1.15;EC:3.6.4.4	Z	AT1G20060.3	ATP_binding_microtubule_motor_family_protein
REFERENCE	evm.model.Ug_unitig_899.946	fe-S cluster assembly factor HCF101, chloroplastic	noEC	D	AT3G24430.1	ATP_binding_protein
REFERENCE	evm.model.Ug_unitig_899.938	protein NRT1/ PTR FAMILY 8.1-like	EC:7.4.2.5	E	AT3G54140.2	peptide_transporter_1
REFERENCE	evm.model.Ug_unitig_899.929	probable glucan endo-1,3-beta-glucosidase A6	EC:3.2.1.21;EC:3.2.1.39	G	AT3G07320.1	O-Glycosyl_hydrolases_family_17_protein
REFERENCE	evm.model.Ug_unitig_899.927	66 kDa stress protein-like	noEC	Z	AT3G18060.1	transducin_family_protein_/_WD-40_repeat_family_protein
REFERENCE	evm.model.Ug_unitig_899.915	serine/threonine-protein kinase TOUSLED	EC:2.7.11	T	AT5G20930.1	Protein_kinase_superfamily_protein
REFERENCE	evm.model.Ug_unitig_899.904	V-type proton ATPase subunit E	EC:3.6.1.3;EC:7.1.2.1;EC:3.6.1.15	C	AT4G11150.1	vacuolar_ATP_synthase_subunit_E1
REFERENCE	evm.model.Ug_unitig_899.894	Vesicle-associated membrane protein 714	noEC	U	AT5G22360.1	vesicle-associated_membrane_protein_714
TEST	evm.model.Ug_unitig_899.881	uncharacterized RNA pseudouridine synthase aq_1464-like	EC:5.4.99.24;EC:5.4.99.23;EC:5.4.99.19;EC:5.4.99.29;EC:5.4.99.20;EC:5.4.99.22;EC:5.4.99.21;EC:5.4.99.43	J	AT2G39140.1	pseudouridine_synthase_family_protein
TEST	evm.model.Ug_unitig_899.879	calpain-type cysteine protease DEK1	EC:3.4.22	OT	AT1G55350.6	calpain-type_cysteine_protease_family
REFERENCE	evm.model.Ug_unitig_899.869	Acetyl-coa acetyltransferase, cytosolic 1	EC:2.3.1.16;EC:2.3.1.9	I	AT5G47720.4	Thiolase_family_protein
TEST	evm.model.Ug_unitig_899.860	ATP-dependent DNA helicase	EC:3.6.1.3;EC:3.6.4.12;EC:3.6.1.15	L	noTAIR	NULL
REFERENCE	evm.model.Ug_unitig_899.857	ATP-dependent zinc metalloprotease FTSH 2, chloroplastic	EC:3.4.24;EC:3.6.1.3;EC:3.6.1.15;EC:3.6.4.3	O	AT2G30950.3	FtsH_extracellular_protease_family
REFERENCE	evm.model.Ug_unitig_899.848	Squamosa promoter-binding-like protein	noEC	S	AT4G18425.1	transmembrane_protein%2C_putative_(DUF679)
REFERENCE	evm.model.Ug_unitig_899.847	protein NUCLEAR FUSION DEFECTIVE 6, chloroplastic/mitochondrial-like isoform X2	noEC	S	AT1G28395.3	hypothetical_protein
REFERENCE	evm.model.Ug_unitig_899.824	non-canonical poly(A) RNA polymerase PAPD5	EC:2.7.7.19	L	AT5G53770.1	Nucleotidyltransferase_family_protein
TEST	evm.model.Ug_unitig_899.817	splicing factor, suppressor of white-apricot homolog isoform X1	noEC	A	AT5G55100.1	SWAP_(Suppressor-of-White-APricot)/surp_domain-containing_protein
REFERENCE	evm.model.Ug_unitig_899.814	65-kDa microtubule-associated protein 1-like	noEC	DZ	AT4G26760.1	microtubule-associated_protein_65-2
REFERENCE	evm.model.Ug_unitig_899.805	Transcription termination factor like	noEC	K	AT5G55580.2	Mitochondrial_transcription_termination_factor_family_protein
REFERENCE	evm.model.Ug_unitig_899.803	Pectinesterase	EC:3.1.1.11;EC:3.1.1.1	G	AT5G55590.1	Pectin_lyase-like_superfamily_protein
REFERENCE	evm.model.Ug_unitig_899.802	protein RRP6-like 3 isoform X1	EC:3.1.13;EC:3.1.15	J	AT2G32415.1	Polynucleotidyl_transferase%2C_ribonuclease_H_fold_protein_with_HRDC_domain-containing_protein
REFERENCE	evm.model.Ug_unitig_899.789	E3 ubiquitin-protein ligase	noEC	O	AT3G46620.1	zinc_finger_(C3HC4-type_RING_finger)_family_protein
REFERENCE	evm.model.Ug_unitig_899.766	CLIP-associated protein	noEC	S	AT2G20190.1	CLIP-associated_protein
REFERENCE	evm.model.Ug_unitig_899.755	TBC1 domain family member 8B-like isoform X1	noEC	U	AT3G55020.1	Ypt/Rab-GAP_domain_of_gyp1p_superfamily_protein
REFERENCE	evm.model.Ug_unitig_899.753	Syntaxin/epimorphin, conserved site-containing protein	noEC	U	AT3G09740.1	syntaxin_of_plants_71
REFERENCE	evm.model.Ug_unitig_899.747	Pectinesterase	EC:3.1.1.11;EC:3.1.1.1	G	AT2G36710.1	Pectin_lyase-like_superfamily_protein
TEST	evm.model.Ug_unitig_899.735	Iron-sulfur assembly protein IscA-like 2, mitochondrial	noEC	CU	AT5G03905.1	Iron-sulfur_cluster_biosynthesis_family_protein
REFERENCE	evm.model.Ug_unitig_899.734	Small nuclear ribonucleoprotein G	noEC	A	AT3G11500.2	Small_nuclear_ribonucleoprotein_family_protein
REFERENCE	evm.model.Ug_unitig_899.732	Eukaryotic translation initiation factor 3 subunit A	noEC	J	AT4G11420.1	eukaryotic_translation_initiation_factor_3A
TEST	evm.model.Ug_unitig_899.730	FH protein interacting protein FIP2	noEC	K	AT5G55000.2	potassium_channel_tetramerization_domain-containing_protein_/_pentapeptide_repeat-containing_protein
REFERENCE	evm.model.Ug_unitig_899.729	HSP20-like chaperone	noEC	O	AT3G03773.1	HSP20-like_chaperones_superfamily_protein
TEST	evm.model.Ug_unitig_899.724	Mitochondrial import receptor subunit TOM7-1	noEC	U	AT5G41685.1	Mitochondrial_outer_membrane_translocase_complex%2C_subunit_Tom7
REFERENCE	evm.model.Ug_unitig_899.721	Putative ovule protein	noEC	none	AT5G58100.2	transmembrane_protein
REFERENCE	evm.model.Ug_unitig_899.719	Pectinesterase	EC:3.1.1.11;EC:3.1.1.1	G	AT3G43270.1	Plant_invertase/pectin_methylesterase_inhibitor_superfamily
TEST	evm.model.Ug_unitig_899.716	Eukaryotic translation initiation factor 3 subunit K	noEC	J	AT4G33250.1	eukaryotic_translation_initiation_factor_3K
REFERENCE	evm.model.Ug_unitig_899.714	Pectinesterase	EC:3.1.1.11;EC:3.1.1.1	G	AT5G20860.2	Plant_invertase/pectin_methylesterase_inhibitor_superfamily
REFERENCE	evm.model.Ug_unitig_899.701	Callose synthase 12	EC:2.4.1.34	M	AT4G03550.1	glucan_synthase-like_5
REFERENCE	evm.model.Ug_unitig_899.700	Callose synthase 12	EC:2.4.1.34	M	AT4G03550.1	glucan_synthase-like_5
REFERENCE	evm.model.Ug_unitig_899.699	callose synthase 12-like	EC:2.4.1.34	M	AT4G03550.1	glucan_synthase-like_5
REFERENCE	evm.model.Ug_unitig_899.693	Putative glucan 1,3-alpha-glucosidase	EC:3.2.1.20;EC:3.2.1.84	G	AT5G63840.2	Glycosyl_hydrolases_family_31_protein
REFERENCE	evm.model.Ug_unitig_899.690	NAC domain protein	noEC	K	AT5G08790.1	NAC_(No_Apical_Meristem)_domain_transcriptional_regulator_superfamily_protein
REFERENCE	evm.model.Ug_unitig_899.685	Oxygen-evolving enhancer protein 1, chloroplastic	noEC	S	AT3G50820.1	photosystem_II_subunit_O-2
REFERENCE	evm.model.Ug_unitig_899.680	Histone-lysine N-methyltransferase SUVR5	EC:2.1.1.43	B	AT2G23740.6	histone-lysine_N-methyltransferase_SUVR5
REFERENCE	evm.model.Ug_unitig_899.673	Protein CROWDED NUCLEI 1	noEC	S	AT1G67230.1	little_nuclei1
TEST	evm.model.Ug_unitig_899.656	Auxin transport protein big	noEC	T	AT3G02260.2	auxin_transport_protein_(BIG)
REFERENCE	evm.model.Ug_unitig_899.653	cytochrome P450 85A1	noEC	Q	AT3G30180.1	brassinosteroid-6-oxidase_2
REFERENCE	evm.model.Ug_unitig_899.637	Exocyst complex component	noEC	U	AT3G56640.1	exocyst_complex_component_sec15A
TEST	evm.model.Ug_unitig_899.630	Eukaryotic translation initiation factor 3 subunit E	noEC	J	AT3G57290.1	eukaryotic_translation_initiation_factor_3E
REFERENCE	evm.model.Ug_unitig_899.626	ras-related protein RABA4d-like	EC:3.6.1.15	U	AT3G12160.1	RAB_GTPase_homolog_A4D
REFERENCE	evm.model.Ug_unitig_899.617	40S ribosomal protein S5	noEC	J	AT3G11940.2	ribosomal_protein_5A
REFERENCE	evm.model.Ug_unitig_899.610	Peroxisome biogenesis protein 12	noEC	O	AT3G04460.1	peroxin-12
REFERENCE	evm.model.Ug_unitig_899.590	Pectate lyase	EC:4.2.2.2	G	AT5G04310.2	Pectin_lyase-like_superfamily_protein
REFERENCE	evm.model.Ug_unitig_899.588	leucine--tRNA ligase, cytoplasmic-like	EC:6.1.1.4;EC:6.1.1.9;EC:6.1.1.18;EC:3.1.1.1	J	AT1G09620.1	ATP_binding/leucine-tRNA_ligases/aminoacyl-tRNA_ligase
REFERENCE	evm.model.Ug_unitig_899.575	Tubulin alpha chain	EC:3.6.1.15	Z	AT5G19780.1	tubulin_alpha-5
REFERENCE	evm.model.Ug_unitig_899.572	Cytosine-specific methyltransferase	EC:2.1.1.37	B	AT1G69770.1	chromomethylase_3
REFERENCE	evm.model.Ug_unitig_899.566	cell division control protein 45 homolog	EC:3.6.1.3;EC:3.6.4.12;EC:3.6.1.15	L	AT3G25100.1	cell_division_cycle_45
REFERENCE	evm.model.Ug_unitig_899.558	protein SEH1	noEC	U	AT1G64350.1	Transducin/WD40_repeat-like_superfamily_protein
REFERENCE	evm.model.Ug_unitig_899.549	Cellulose synthase	EC:2.4.1.12	G	AT5G64740.1	cellulose_synthase_6
REFERENCE	evm.model.Ug_unitig_899.539	mannan endo-1,4-beta-mannosidase 7-like	EC:3.2.1.25;EC:3.2.1.78	G	AT5G66460.1	Glycosyl_hydrolase_superfamily_protein
REFERENCE	evm.model.Ug_unitig_899.538	GTPase Era	noEC	DT	AT5G66470.2	GTP-binding_protein_Era-like_protein
REFERENCE	evm.model.Ug_unitig_899.537	26S proteasome non-ATPase regulatory subunit 11 homolog	noEC	O	AT1G29150.2	non-ATPase_subunit_9
REFERENCE	evm.model.Ug_unitig_899.506	Histone-lysine N-methyltransferase	EC:2.1.1.43	K	AT2G23380.1	SET_domain-containing_protein
REFERENCE	evm.model.Ug_unitig_899.505	PI-PLC X domain-containing protein	EC:2.1.1.43	S	AT5G67130.1	PLC-like_phosphodiesterases_superfamily_protein
REFERENCE	evm.model.Ug_unitig_899.486	RuBisCO large subunit-binding protein subunit alpha	noEC	O	AT2G28000.1	chaperonin-60alpha
TEST	evm.model.Ug_unitig_899.479	protein SAND-like	noEC	S	AT2G28390.1	SAND_family_protein
REFERENCE	evm.model.Ug_unitig_899.477	60S ribosomal protein L12	noEC	J	AT2G37190.1	Ribosomal_protein_L11_family_protein
REFERENCE	evm.model.Ug_unitig_899.470	Elongation factor 1-alpha	EC:3.6.1.15	J	AT5G60390.3	GTP_binding_Elongation_factor_Tu_family_protein
REFERENCE	evm.model.Ug_unitig_899.455	K-stimulated pyrophosphate-energized sodium pump protein	noEC	none	AT5G59960.1	K-stimulated_pyrophosphate-energized_sodium_pump_protein
REFERENCE	evm.model.Ug_unitig_899.440	ATP sulfurylase 1, chloroplastic	EC:2.7.7.4;EC:2.7.1.25	P	AT3G22890.1	ATP_sulfurylase_1
REFERENCE	evm.model.Ug_unitig_899.439	dymeclin isoform X2	noEC	S	AT1G04200.3	dyggve-melchior-clausen_syndrome_protein
REFERENCE	evm.model.Ug_unitig_899.438	Protein slow green 1, chloroplastic	noEC	S	AT3G18420.1	Protein_prenylyltransferase_superfamily_protein
REFERENCE	evm.model.Ug_unitig_899.431	TBC1 domain family member 13	noEC	S	AT4G13730.1	Ypt/Rab-GAP_domain_of_gyp1p_superfamily_protein
REFERENCE	evm.model.Ug_unitig_899.420	Guanine nucleotide-binding protein, beta subunit	noEC	S	AT1G04140.1	Transducin_family_protein_/_WD-40_repeat_family_protein
REFERENCE	evm.model.Ug_unitig_899.390	Glutamine synthetase	EC:6.3.1.2	E	AT5G37600.1	hypothetical_protein
TEST	evm.model.Ug_unitig_899.346	Putative JAB1/MPN/MOV34 metalloenzyme domain-containing protein	EC:3.4.19.12	O	AT3G06820.3	Mov34/MPN/PAD-1_family_protein
TEST	evm.model.Ug_unitig_899.345	Lys-63-specific deubiquitinase BRCC36	EC:3.4.19.12	O	AT1G80210.1	Mov34/MPN/PAD-1_family_protein
REFERENCE	evm.model.Ug_unitig_899.333	mitochondrial import inner membrane translocase subunit TIM23-2-like	EC:7.4.2.3;EC:7.4.2.4	U	AT1G17530.1	translocase_of_inner_mitochondrial_membrane_23
REFERENCE	evm.model.Ug_unitig_899.325	40s ribosomal protein s10	noEC	J	AT4G25740.1	RNA_binding_Plectin/S10_domain-containing_protein
TEST	evm.model.Ug_unitig_899.303	Anamorsin homolog	noEC	S	AT5G18400.1	Cytokine-induced_anti-apoptosis_inhibitor_1%2C_Fe-S_biogenesi
REFERENCE	evm.model.Ug_unitig_899.296	SRSF protein kinase 1-like	EC:2.7.11	T	AT4G35500.1	Protein_kinase_superfamily_protein
REFERENCE	evm.model.Ug_unitig_899.291	G2/mitotic-specific cyclin-2-like	noEC	D	AT1G76310.1	CYCLIN_B2%3B4
REFERENCE	evm.model.Ug_unitig_899.286	Cytochrome c oxidase assembly protein cox15	EC:1.9.3.1	O	AT5G56090.1	cytochrome_c_oxidase_15
REFERENCE	evm.model.Ug_unitig_899.282	WD repeat-containing protein 82-B	EC:2.1.1.43	ABO	AT5G66240.1	Transducin/WD40_repeat-like_superfamily_protein
REFERENCE	evm.model.Ug_unitig_899.280	NAC domain-containing protein 37-like	noEC	K	AT2G18060.3	vascular_related_NAC-domain_protein_1
REFERENCE	evm.model.Ug_unitig_899.276	Autophagy-related protein 13	noEC	U	AT3G49590.2	Autophagy-related_protein_13
REFERENCE	evm.model.Ug_unitig_899.273	chromatin assembly factor 1 subunit FAS2-like	noEC	BL	AT5G64630.2	Transducin/WD40_repeat-like_superfamily_protein
REFERENCE	evm.model.Ug_unitig_899.250	Putative polygalacturonase	EC:3.2.1.15	G	AT4G33440.1	Pectin_lyase-like_superfamily_protein
TEST	evm.model.Ug_unitig_899.248	SWR1 complex subunit 6	noEC	S	AT5G37055.1	HIT-type_Zinc_finger_family_protein
REFERENCE	evm.model.Ug_unitig_899.246	Histone deacetylase 14	EC:3.5.1.98	B	AT4G33470.1	histone_deacetylase_14
REFERENCE	evm.model.Ug_unitig_899.238	mitogen-activated protein kinase kinase kinase 3-like	EC:2.7.11	T	AT5G67080.1	mitogen-activated_protein_kinase_kinase_kinase_19
REFERENCE	evm.model.Ug_unitig_899.237	Protein kinase, ATP binding site-containing protein	EC:2.7.11.25;EC:2.7.11	T	AT4G36950.1	mitogen-activated_protein_kinase_kinase_kinase_21
REFERENCE	evm.model.Ug_unitig_899.220	dof zinc finger protein DOF3.4-like	noEC	B	AT5G66940.1	Dof-type_zinc_finger_DNA-binding_family_protein
REFERENCE	evm.model.Ug_unitig_899.213	Histone deacetylation protein Rxt3	noEC	S	AT5G08450.3	zinc_finger_CCCH_domain_protein
REFERENCE	evm.model.Ug_unitig_899.199	Cellulose synthase	EC:2.4.1.12	G	AT5G64740.1	cellulose_synthase_6
TEST	evm.model.Ug_unitig_899.189	tRNA(His) guanylyltransferase 1	noEC	S	AT2G32320.1	tRNAHis_guanylyltransferase
REFERENCE	evm.model.Ug_unitig_899.178	Protein heat intolerant 4	noEC	none	AT5G10010.1	myosin-H_heavy_protein
REFERENCE	evm.model.Ug_unitig_899.163	probable N-acetyltransferase HLS1	EC:2.3.1.5	S	AT2G23060.1	Acyl-CoA_N-acyltransferases_(NAT)_superfamily_protein
TEST	evm.model.Ug_unitig_899.151	Dna repair protein rad4	noEC	L	AT5G16630.2	DNA_repair_protein_Rad4_family
TEST	evm.model.Ug_unitig_899.138	synaptonemal complex protein 1-like	noEC	S	AT1G22275.1	Myosin_heavy_chain-related_protein
REFERENCE	evm.model.Ug_unitig_899.127	Coatomer beta subunit	noEC	S	AT2G22125.1	binding_protein
REFERENCE	evm.model.Ug_unitig_899.126	Coatomer beta subunit	noEC	S	AT2G22125.1	binding_protein
REFERENCE	evm.model.Ug_unitig_899.123	Type I inositol polyphosphate 5-phosphatase 5	EC:3.1.3.36	T	AT5G65090.3	DNAse_I-like_superfamily_protein
REFERENCE	evm.model.Ug_unitig_899.105	DUF827 domain-containing protein	noEC	S	AT1G66840.2	PLASTID_MOVEMENT_IMPAIRED_protein_(DUF827)
TEST	evm.model.Ug_unitig_899.62	Uricase	EC:1.7.3.3	Q	AT2G26230.1	uricase_/_urate_oxidase_/_nodulin_35
TEST	evm.model.Ug_unitig_899.61	Phosphatidylinositol N-acetylglucosaminyltransferase subunit A like	EC:3.6.1.3;EC:3.6.1.15;EC:2.4.1.198	IMO	AT3G45100.3	UDP-Glycosyltransferase_superfamily_protein
REFERENCE	evm.model.Ug_unitig_899.59	nuclear pore complex protein NUP1-like	noEC	UY	AT3G10650.2	nuclear_pore_complex_protein
TEST	evm.model.Ug_unitig_899.58	protein arv1 homolog isoform X1	noEC	S	AT1G01020.1	ARV1_family_protein
REFERENCE	evm.model.Ug_unitig_899.55	NAC transcription factor	noEC	K	AT5G08790.1	NAC_(No_Apical_Meristem)_domain_transcriptional_regulator_superfamily_protein
TEST	evm.model.Ug_unitig_899.42	Vacuolar protein sorting-associated protein 53 A	noEC	U	AT1G50500.4	Membrane_trafficking_VPS53_family_protein
REFERENCE	evm.model.Ug_unitig_899.41	ethylene-responsive transcription factor RAP2-7-like isoform X2	noEC	K	AT2G28550.1	related_to_AP2.7
REFERENCE	evm.model.Ug_unitig_899.37	sporulation protein RMD1	noEC	S	AT5G13610.1	sporulation_RMD1-like_protein%2C_putative_(DUF155)
TEST	evm.model.Ug_unitig_899.29	Pentatricopeptide repeat-containing protein	EC:1.11.1.7	S	AT3G04260.1	plastid_transcriptionally_active_3
REFERENCE	evm.model.Ug_unitig_750.101	Agamous-like MADS-box protein	noEC	K	AT1G18750.4	AGAMOUS-like_65
REFERENCE	evm.model.Ug_unitig_750.95	Beta-glucosidase, lactase phlorizinhydrolase	EC:3.2.1.21	G	AT2G44490.1	Glycosyl_hydrolase_superfamily_protein
REFERENCE	evm.model.Ug_unitig_750.90	Dynein light chain LC6, flagellar outer arm	EC:3.6.1.15	Z	AT5G20110.1	Dynein_light_chain_type_1_family_protein
TEST	evm.model.Ug_unitig_750.87	cytochrome b561, DM13 and DOMON domain-containing protein At5g54830	noEC	DT	AT5G54830.1	DOMON_domain-containing_protein_/_dopamine_beta-monooxygenase_N-terminal_domain-containing_protein
REFERENCE	evm.model.Ug_unitig_750.82	RNA-dependent RNA polymerase	EC:2.7.7.48	H	AT4G11130.1	RNA-dependent_RNA_polymerase_2
TEST	evm.model.Ug_unitig_750.79	DNA topoisomerase I	EC:5.99.1.2	L	AT5G55300.1	DNA_topoisomerase_I_alpha
REFERENCE	evm.model.Ug_unitig_750.75	Iron-sulfur cluster assembly protein	noEC	C	AT4G22220.1	SufE/NifU_family_protein
REFERENCE	evm.model.Ug_unitig_750.70	E3 ubiquitin-protein ligase BOI	noEC	O	AT1G10650.1	SBP_(S-ribonuclease_binding_protein)_family_protein
REFERENCE	evm.model.Ug_unitig_750.59	Homeobox-leucine zipper protein HDG11	noEC	K	AT1G73360.1	homeodomain_GLABROUS_11
REFERENCE	evm.model.Ug_unitig_750.48	Glycosyltransferase-like KOBITO 1	noEC	S	AT3G08550.1	elongation_defective_1_protein_/_ELD1_protein
REFERENCE	evm.model.Ug_unitig_750.34	E3 ubiquitin-protein ligase RING1-like	noEC	O	AT5G59550.1	zinc_finger_(C3HC4-type_RING_finger)_family_protein
REFERENCE	evm.model.Ug_unitig_750.18	ELMO domain-containing protein C-like isoform X1	noEC	S	AT3G60260.4	ELMO/CED-12_family_protein
REFERENCE	evm.model.Ug_unitig_750.1	scarecrow-like protein 22	noEC	K	AT4G00150.1	GRAS_family_transcription_factor
REFERENCE	evm.model.Ug_unitig_749.1087	Scarecrow-like protein 22	noEC	K	AT4G00150.1	GRAS_family_transcription_factor
REFERENCE	evm.model.Ug_unitig_749.1077	AT-hook motif nuclear-localized protein 1	noEC	K	AT4G12080.1	AT-hook_motif_nuclear-localized_protein_1
REFERENCE	evm.model.Ug_unitig_749.1064	Crs2-associated factor 1, mitochondrial	noEC	J	AT4G31010.1	RNA-binding_CRS1_/_YhbY_(CRM)_domain-containing_protein
TEST	evm.model.Ug_unitig_749.1063	Peroxisomal membrane protein PEX16	noEC	U	AT2G45690.1	shrunken_seed_protein_(SSE1)
REFERENCE	evm.model.Ug_unitig_749.1053	AT-rich interactive domain-containing protein 1-like	noEC	K	AT4G21090.3	MITOCHONDRIAL_FERREDOXIN_2
REFERENCE	evm.model.Ug_unitig_749.1038	Cellulose synthase	EC:2.4.1.12	M	AT5G05170.1	Cellulose_synthase_family_protein
TEST	evm.model.Ug_unitig_749.1034	Protein TAB2 homolog, chloroplastic	noEC	S	AT3G08010.1	RNA_binding_protein
REFERENCE	evm.model.Ug_unitig_749.1030	Serine/threonine-protein kinase TIO	EC:2.7.11	T	AT1G50240.3	kinase_family_with_ARM_repeat_domain-containing_protein
REFERENCE	evm.model.Ug_unitig_749.1022	protein TPX2-like isoform X1	noEC	S	AT4G22860.1	Cell_cycle_regulated_microtubule_associated_protein
REFERENCE	evm.model.Ug_unitig_749.1019	Protein FIZZY-RELATED 2-like	noEC	DO	AT4G22910.1	FIZZY-related_2
REFERENCE	evm.model.Ug_unitig_749.1010	40S ribosomal protein S14	noEC	J	AT3G52580.1	Ribosomal_protein_S11_family_protein
REFERENCE	evm.model.Ug_unitig_749.1004	Iron-sulfur cluster biosynthesis family protein (Fragment)	noEC	CU	AT5G03900.2	Iron-sulfur_cluster_biosynthesis_family_protein
TEST	evm.model.Ug_unitig_749.981	origin of replication complex subunit 3-like isoform X1	noEC	L	AT5G16690.1	origin_recognition_complex_subunit_3
REFERENCE	evm.model.Ug_unitig_749.966	Histone H2A	noEC	B	AT5G02560.1	histone_H2A_12
REFERENCE	evm.model.Ug_unitig_749.948	vacuolar protein sorting-associated protein 2 homolog 1	noEC	U	AT2G06530.1	SNF7_family_protein
REFERENCE	evm.model.Ug_unitig_749.943	myosin-17-like isoform X1	EC:3.6.1.3;EC:3.6.1.15	Z	AT5G20490.3	myosin_family_protein_with_Dil
REFERENCE	evm.model.Ug_unitig_749.942	Myosin XI	EC:3.6.1.3;EC:5.99.1.2;EC:3.6.1.15	Z	AT5G20490.2	myosin_family_protein_with_Dil
REFERENCE	evm.model.Ug_unitig_749.937	Putative esterase	EC:3.1.1.73;EC:3.1.1.1	I	AT3G47560.4	alpha/beta-Hydrolases_superfamily_protein
REFERENCE	evm.model.Ug_unitig_749.935	probable protein arginine N-methyltransferase 1.2	EC:2.1.1.125	KOT	AT4G29510.1	arginine_methyltransferase_11
REFERENCE	evm.model.Ug_unitig_749.925	Ubiquitin carboxyl-terminal hydrolase 12	EC:3.4.22;EC:3.4.19.12	O	AT5G06600.1	ubiquitin-specific_protease_12
REFERENCE	evm.model.Ug_unitig_749.918	60S ribosomal protein L24	noEC	J	AT3G53020.1	Ribosomal_protein_L24e_family_protein
REFERENCE	evm.model.Ug_unitig_749.911	putative clathrin assembly protein At5g57200	noEC	TU	AT5G57200.1	ENTH/ANTH/VHS_superfamily_protein
REFERENCE	evm.model.Ug_unitig_749.910	putative clathrin assembly protein At5g57200	noEC	TU	AT5G57200.1	ENTH/ANTH/VHS_superfamily_protein
REFERENCE	evm.model.Ug_unitig_749.908	Xyloglucan endotransglucosylase/hydrolase	EC:2.4.1.207	G	AT4G25810.1	xyloglucan_endotransglycosylase_6
REFERENCE	evm.model.Ug_unitig_749.906	SART-1 family protein DOT2	noEC	A	AT5G16780.3	SART-1_family
REFERENCE	evm.model.Ug_unitig_749.902	Pectinesterase	EC:3.1.1.11;EC:3.1.1.1	G	AT2G26440.1	Plant_invertase/pectin_methylesterase_inhibitor_superfamily
REFERENCE	evm.model.Ug_unitig_749.901	SH3 domain-containing protein	noEC	S	AT3G43230.1	RING/FYVE/PHD-type_zinc_finger_family_protein
REFERENCE	evm.model.Ug_unitig_749.900	Sucrose synthase	EC:2.4.1.13	M	AT3G43190.2	sucrose_synthase_4
REFERENCE	evm.model.Ug_unitig_749.883	dnaJ homolog subfamily B member 13-like	noEC	O	AT5G01390.1	DNAJ_heat_shock_family_protein
REFERENCE	evm.model.Ug_unitig_749.871	Actin	noEC	Z	AT3G53750.2	actin_3
REFERENCE	evm.model.Ug_unitig_749.859	probable glycosyltransferase STELLO1	noEC	S	AT2G41770.1	transmembrane_protein%2C_putative_(DUF288)
REFERENCE	evm.model.Ug_unitig_749.856	zinc finger protein WIP2-like	noEC	S	AT3G57670.1	C2H2-type_zinc_finger_family_protein
REFERENCE	evm.model.Ug_unitig_749.854	Outer envelope pore protein 16-3, chloroplastic/mitochondrial	EC:7.1.1.2;EC:1.6.99.5;EC:1.6.99.3	U	AT2G42210.2	Mitochondrial_import_inner_membrane_translocase_subunit_Tim17/Tim22/Tim23_family_protein
REFERENCE	evm.model.Ug_unitig_749.825	Mitogen-activated protein kinase	EC:2.7.11;EC:2.7.11.24	T	AT3G18040.4	MAP_kinase_9
REFERENCE	evm.model.Ug_unitig_749.822	Transcription termination factor mtef1, chloroplastic	noEC	K	AT2G34620.1	Mitochondrial_transcription_termination_factor_family_protein
REFERENCE	evm.model.Ug_unitig_749.819	Protein breaking of asymmetry in the stomatal lineage	noEC	S	noTAIR	NULL
TEST	evm.model.Ug_unitig_749.804	eyes absent homolog 2-like isoform X1	EC:3.1.3.16;EC:3.1.3.48	K	AT2G35320.1	eyes_absent-like_protein
REFERENCE	evm.model.Ug_unitig_749.800	Transmembrane emp24 domain-containing protein p24beta3	noEC	U	AT3G22845.1	emp24/gp25L/p24_family/GOLD_family_protein
TEST	evm.model.Ug_unitig_749.799	condensin-2 complex subunit H2-like	noEC	S	AT3G16730.1	condensin-2_complex_subunit_H2-like_protein
TEST	evm.model.Ug_unitig_749.790	protein CDC73 homolog	noEC	K	AT3G22590.1	PLANT_HOMOLOGOUS_TO_PARAFIBROMIN
REFERENCE	evm.model.Ug_unitig_749.788	mitogen-activated protein kinase kinase kinase NPK1	EC:2.7.11	T	AT1G09000.1	NPK1-related_protein_kinase_1
REFERENCE	evm.model.Ug_unitig_749.786	Putative atp-dependent dna helicase chr12	EC:3.6.1.3;EC:3.6.1.15	A	AT3G06010.1	SNF2/Brahma-type_chromatin-remodeling_protein_CHR12
TEST	evm.model.Ug_unitig_749.776	Putative coiled-coil-helix-coiled-coil-helix domain-containing 8-like	noEC	none	AT5G18920.1	Cox19-like_CHCH_family_protein
REFERENCE	evm.model.Ug_unitig_749.773	DUF679 domain membrane protein 2	noEC	S	AT3G21550.1	transmembrane_protein%2C_putative_(DUF679_domain_membrane_protein_2)
REFERENCE	evm.model.Ug_unitig_749.771	Seipin-1 isoform A	noEC	S	AT5G16460.1	Putative_adipose-regulatory_protein_(Seipin)
REFERENCE	evm.model.Ug_unitig_749.758	Pectinesterase	EC:3.1.1.11;EC:3.1.1.1	I	AT1G53840.1	pectin_methylesterase_1
REFERENCE	evm.model.Ug_unitig_749.757	Protein POLYCHOME like	noEC	S	AT2G42260.2	uv-b-insensitive_4
REFERENCE	evm.model.Ug_unitig_749.755	Actin	noEC	Z	AT3G53750.2	actin_3
REFERENCE	evm.model.Ug_unitig_749.754	Protein trichome birefringence	noEC	S	AT5G06700.1	trichome_birefringence-like_protein_(DUF828)
REFERENCE	evm.model.Ug_unitig_749.753	40S ribosomal protein S5	noEC	J	AT3G11940.2	ribosomal_protein_5A
REFERENCE	evm.model.Ug_unitig_749.751	Tubulin alpha chain	EC:3.6.1.15	Z	AT5G19780.1	tubulin_alpha-5
REFERENCE	evm.model.Ug_unitig_749.749	Pre-mRNA-splicing factor 18	noEC	A	AT1G03140.1	splicing_factor_Prp18_family_protein
REFERENCE	evm.model.Ug_unitig_749.734	ATP-dependent DNA helicase MER3-like protein	EC:3.6.1.3;EC:3.6.4.12;EC:3.6.4.13;EC:3.6.1.15	A	AT3G27730.7	DNA_helicase_ROCK-N-ROLLERS
TEST	evm.model.Ug_unitig_749.733	DExH-box ATP-dependent RNA helicase DExH17 isoform X1	EC:3.6.1.3;EC:3.6.4.12;EC:3.6.4.13;EC:3.6.1.15	A	AT3G27730.7	DNA_helicase_ROCK-N-ROLLERS
REFERENCE	evm.model.Ug_unitig_749.729	Amidophosphoribosyltransferase	EC:2.4.2.14	F	AT2G16570.1	GLN_phosphoribosyl_pyrophosphate_amidotransferase_1
REFERENCE	evm.model.Ug_unitig_749.720	Rac-like GTP-binding protein 5	EC:3.6.1.15	V	AT4G35020.3	RAC-like_3
REFERENCE	evm.model.Ug_unitig_749.704	Histone H2A	noEC	B	AT1G51060.1	histone_H2A_10
REFERENCE	evm.model.Ug_unitig_749.697	glucose-6-phosphate/phosphate translocator 1, chloroplastic-like	noEC	EG	AT5G54800.1	glucose_6-phosphate/phosphate_translocator_1
REFERENCE	evm.model.Ug_unitig_749.685	photosystem II repair protein PSB27-H1, chloroplastic	noEC	S	AT1G03600.1	photosystem_II_family_protein
TEST	evm.model.Ug_unitig_749.679	frataxin, mitochondrial	EC:1.16.3.1;EC:1.16.3	P	AT4G03240.1	frataxin-like_protein
TEST	evm.model.Ug_unitig_749.674	Membrane metalloprotease ARASP, chloroplastic	EC:3.4.24	M	AT2G32480.1	chloroplastic_membrane_metallo_proteases
TEST	evm.model.Ug_unitig_749.673	probable membrane metalloprotease ARASP2, chloroplastic	EC:3.4.24	M	AT1G05140.1	Peptidase_M50_family_protein
REFERENCE	evm.model.Ug_unitig_749.667	protein PAT1 homolog 1-like	noEC	S	AT4G14990.1	Topoisomerase_II-associated_protein_PAT1
REFERENCE	evm.model.Ug_unitig_749.665	Putative WRB/Get1 family protein	noEC	S	AT4G16444.1	tail-anchored_protein_insertion_receptor_WRB-like_protein
REFERENCE	evm.model.Ug_unitig_749.635	Small GTPase superfamily	EC:3.6.1.15	V	AT1G75840.1	RAC-like_GTP_binding_protein_5
REFERENCE	evm.model.Ug_unitig_749.628	HMG box-containing protein	noEC	K	AT1G20693.2	high_mobility_group_B2
REFERENCE	evm.model.Ug_unitig_749.612	flowering-promoting factor 1-like	noEC	S	AT5G10625.1	flowering-promoting_factor-like_protein
REFERENCE	evm.model.Ug_unitig_749.603	Galactan beta-1,4-galactosyltransferase gals1	EC:2.4.1.38	S	AT2G33570.1	glycosyltransferase_family_protein_(DUF23)
REFERENCE	evm.model.Ug_unitig_749.600	Filament-like plant protein 4	noEC	S	AT1G19835.6	filament-like_protein_(DUF869)
REFERENCE	evm.model.Ug_unitig_749.588	J domain-containing protein required for chloroplast accumulation response 1 (Fragment)	noEC	S	AT1G75100.1	J-domain_protein_required_for_chloroplast_accumulation_response_1
TEST	evm.model.Ug_unitig_749.587	Peroxisomal membrane protein 11A	noEC	U	AT1G47750.1	peroxin_11A
REFERENCE	evm.model.Ug_unitig_749.586	Histone deacetylase complex subunit SAP30/SAP30-like	EC:3.5.1.98	S	AT1G19330.2	histone_deacetylase_complex_subunit
REFERENCE	evm.model.Ug_unitig_749.584	APO protein 1, chloroplastic	noEC	S	AT1G64810.2	APO_RNA-binding_protein_(DUF794)
REFERENCE	evm.model.Ug_unitig_749.581	Cellulose synthase	EC:2.4.1.12	O	AT4G32410.1	cellulose_synthase_1
REFERENCE	evm.model.Ug_unitig_749.573	Serine/threonine-protein kinase Aurora-1	EC:2.7.11	T	AT4G32830.1	ataurora1
REFERENCE	evm.model.Ug_unitig_749.572	Cell division control protein 2 homolog A	EC:2.7.11;EC:2.7.11.23;EC:2.7.11.22	L	AT3G48750.1	cell_division_control_2
REFERENCE	evm.model.Ug_unitig_749.563	Transcription factor FAMA	noEC	K	AT3G24140.2	basic_helix-loop-helix_(bHLH)_DNA-binding_superfamily_protein
REFERENCE	evm.model.Ug_unitig_749.548	protein SAD1/UNC-84 domain protein 1-like	noEC	D	AT5G04990.1	SAD1/UNC-84_domain_protein_1
REFERENCE	evm.model.Ug_unitig_749.540	Serine/threonine-protein kinase Aurora-3	EC:2.7.11	T	AT2G45490.1	ataurora3
TEST	evm.model.Ug_unitig_749.539	ATP-dependent DNA helicase 2 subunit KU80	EC:3.6.1.3;EC:3.6.4.12;EC:3.6.1.15	L	AT1G48050.1	Ku80_family_protein
REFERENCE	evm.model.Ug_unitig_749.522	membrane steroid-binding protein 2-like	noEC	S	AT3G48890.1	membrane-associated_progesterone_binding_protein_3
REFERENCE	evm.model.Ug_unitig_749.521	WD repeat-containing protein RUP2	noEC	S	AT5G23730.1	Transducin/WD40_repeat-like_superfamily_protein
REFERENCE	evm.model.Ug_unitig_749.518	Mitogen-activated protein kinase kinase kinase yoda	EC:2.7.11	T	AT1G63700.2	Protein_kinase_superfamily_protein
REFERENCE	evm.model.Ug_unitig_749.504	COMPASS-like H3K4 histone methylase component WDR5B	EC:2.7.11;EC:2.7.11.17;EC:2.7.11.7	S	AT4G02730.1	Transducin/WD40_repeat-like_superfamily_protein
REFERENCE	evm.model.Ug_unitig_749.501	Histone H2A	noEC	B	AT3G54560.2	histone_H2A_11
REFERENCE	evm.model.Ug_unitig_749.496	TBC1 domain family member 15-like isoform X1	noEC	T	AT4G28550.1	Ypt/Rab-GAP_domain_of_gyp1p_superfamily_protein
REFERENCE	evm.model.Ug_unitig_749.494	DNA-damage-repair/toleration protein	EC:3.5.1.98	S	AT3G20820.1	Leucine-rich_repeat_(LRR)_family_protein
TEST	evm.model.Ug_unitig_749.486	zinc finger HIT domain-containing protein 3	noEC	K	AT4G28820.4	HIT-type_Zinc_finger_family_protein
REFERENCE	evm.model.Ug_unitig_749.475	3-oxoacyl-[acyl-carrier-protein] synthase I, chloroplastic	EC:2.3.1.85;EC:2.3.1.41	H	AT5G46290.3	3-ketoacyl-acyl_carrier_protein_synthase_I
TEST	evm.model.Ug_unitig_749.467	Peroxisome biogenesis protein 5	noEC	S	AT5G56290.1	peroxin_5
REFERENCE	evm.model.Ug_unitig_749.386	actin-depolymerizing factor 1	noEC	Z	AT5G59890.1	actin_depolymerizing_factor_4
REFERENCE	evm.model.Ug_unitig_749.370	GDP-mannose 4,6 dehydratase 2	EC:4.2.1.47	G	AT3G51160.1	NAD(P)-binding_Rossmann-fold_superfamily_protein
REFERENCE	evm.model.Ug_unitig_749.368	40S ribosomal protein S8	EC:3.6.1.15	J	AT5G59240.1	Ribosomal_protein_S8e_family_protein
REFERENCE	evm.model.Ug_unitig_749.358	Transcription initiation factor TFIID subunit 7	noEC	K	AT1G55300.2	TBP-associated_factor_7
REFERENCE	evm.model.Ug_unitig_749.355	Tubulin alpha chain	EC:3.6.1.15	Z	AT5G19780.1	tubulin_alpha-5
REFERENCE	evm.model.Ug_unitig_749.349	GTP-binding protein ERG	noEC	DT	AT1G30960.1	GTP-binding_family_protein
REFERENCE	evm.model.Ug_unitig_749.327	Transcription factor GAMYB-like isoform X1	noEC	K	AT3G11440.2	myb_domain_protein_65
TEST	evm.model.Ug_unitig_749.326	Vacuolar protein sorting-associated protein 36	noEC	U	AT5G04920.1	EAP30/Vps36_family_protein
REFERENCE	evm.model.Ug_unitig_749.325	Arp2/3 complex 34 kDa subunit	noEC	Z	AT1G30825.1	Arp2/3_complex%2C_34_kD_subunit_p34-Arc
REFERENCE	evm.model.Ug_unitig_749.317	Zinc finger, FYVE-type	noEC	S	AT1G29800.1	RING/FYVE/PHD-type_zinc_finger_family_protein
TEST	evm.model.Ug_unitig_749.316	Polynucleotide 3-phosphatase ZDP	EC:2.7.4.4;EC:3.1.3.7;EC:3.1.3.32;EC:3.1.3.31;EC:2.7.1.78	KLO	AT3G14890.1	phosphoesterase
REFERENCE	evm.model.Ug_unitig_749.312	Increased DNA methylation 1	EC:2.3.1.5;EC:2.3.1.48	S	AT3G14980.3	Acyl-CoA_N-acyltransferase_with_RING/FYVE/PHD-type_zinc_finger_protein
TEST	evm.model.Ug_unitig_749.305	26S proteasome non-ATPase regulatory subunit 5	noEC	O	AT3G15180.1	ARM_repeat_superfamily_protein
REFERENCE	evm.model.Ug_unitig_749.292	myosin-2-like isoform X1	EC:3.6.1.3;EC:3.6.1.15	Z	AT5G54280.2	myosin_2
REFERENCE	evm.model.Ug_unitig_749.291	Arp2/3 complex 34 kDa subunit	noEC	Z	AT2G33385.3	actin-related_protein_C2B
TEST	evm.model.Ug_unitig_749.288	Meiotic nuclear division protein 1 homolog	noEC	D	AT4G29170.1	Mnd1_family_protein
REFERENCE	evm.model.Ug_unitig_749.285	Tubulin alpha chain	EC:3.6.1.15	Z	AT5G19780.1	tubulin_alpha-5
TEST	evm.model.Ug_unitig_749.278	CRIB domain-containing protein RIC4-like	noEC	S	noTAIR	NULL
TEST	evm.model.Ug_unitig_749.272	Chromatin assembly factor 1 subunit fas1	noEC	B	AT1G65470.1	chromatin_assembly_factor-1_(FASCIATA1)_(FAS1)
REFERENCE	evm.model.Ug_unitig_749.259	probable serine/threonine-protein kinase DDB_G0280111	EC:2.7.11	T	AT2G32850.2	Protein_kinase_superfamily_protein
REFERENCE	evm.model.Ug_unitig_749.250	Peroxisomal membrane protein PEX14	noEC	MOU	AT5G62810.1	peroxin_14
REFERENCE	evm.model.Ug_unitig_749.247	Putative 26S proteasome complex subunit sem1-1	noEC	S	noTAIR	NULL
REFERENCE	evm.model.Ug_unitig_749.234	Dynein light chain	EC:3.6.1.3;EC:3.6.1.15;EC:3.6.4.4	Z	noTAIR	NULL
TEST	evm.model.Ug_unitig_749.225	Microtubule-associated protein RP/EB family member 3	noEC	Z	AT5G62500.1	end_binding_protein_1B
TEST	evm.model.Ug_unitig_749.217	Protein LEO1 homolog isoform X2	noEC	S	AT5G61150.2	leo1-like_family_protein
REFERENCE	evm.model.Ug_unitig_749.216	SNAP25 homologous protein SNAP33	noEC	U	AT5G61210.2	soluble_N-ethylmaleimide-sensitive_factor_adaptor_protein_33
TEST	evm.model.Ug_unitig_749.213	Cysteine desulfurase 2, chloroplastic (Fragment)	EC:2.8.1.7;EC:4.4.1.16	E	AT1G08490.1	chloroplastic_NIFS-like_cysteine_desulfurase
TEST	evm.model.Ug_unitig_749.199	peptidyl-tRNA hydrolase ICT1, mitochondrial	EC:3.1.1.29;EC:3.1.1.1	J	AT1G62850.3	Class_I_peptide_chain_release_factor
TEST	evm.model.Ug_unitig_749.197	General transcription factor IIH subunit 5-like	noEC	S	AT1G12400.2	Nucleotide_excision_repair%2C_TFIIH%2C_subunit_TTDA
REFERENCE	evm.model.Ug_unitig_749.188	chloroplast stem-loop binding protein of 41 kDa b, chloroplastic	EC:5.1.3.2	S	AT1G09340.1	chloroplast_RNA_binding_protein
REFERENCE	evm.model.Ug_unitig_749.175	Pectinesterase	EC:3.1.1.11;EC:3.1.1.1	G	AT5G49180.1	Plant_invertase/pectin_methylesterase_inhibitor_superfamily
TEST	evm.model.Ug_unitig_749.143	cyclin-J18 isoform X1	noEC	D	AT2G01905.1	cyclin_J18
REFERENCE	evm.model.Ug_unitig_749.133	40S ribosomal protein S27	noEC	J	AT3G61110.1	ribosomal_protein_S27
REFERENCE	evm.model.Ug_unitig_749.108	DNA polymerase alpha subunit B	EC:2.7.7.7	L	AT1G67630.1	DNA_polymerase_alpha_2
REFERENCE	evm.model.Ug_unitig_749.76	Serine/threonine-protein phosphatase	EC:3.1.3.16	T	AT1G10430.2	protein_phosphatase_2A-2
REFERENCE	evm.model.Ug_unitig_749.69	single-stranded DNA-binding protein WHY1, chloroplastic	noEC	K	AT1G14410.1	ssDNA-binding_transcriptional_regulator
REFERENCE	evm.model.Ug_unitig_749.43	Transmembrane emp24 domain-containing protein p24delta9-like	noEC	U	AT1G14010.1	emp24/gp25L/p24_family/GOLD_family_protein
REFERENCE	evm.model.Ug_unitig_749.42	ARF guanine-nucleotide exchange factor GNOM	noEC	U	AT1G13980.2	sec7_domain-containing_protein
REFERENCE	evm.model.Ug_unitig_749.36	putative SNAP25 homologous protein SNAP30	noEC	U	AT1G13890.2	soluble_N-ethylmaleimide-sensitive_factor_adaptor_protein_30
REFERENCE	evm.model.Ug_unitig_749.35	protein SPIRAL1-like 1	noEC	S	AT1G26355.1	SPIRAL1-like1
REFERENCE	evm.model.Ug_unitig_749.7	mitochondrial import inner membrane translocase subunit TIM14-1	noEC	O	AT2G35795.1	Chaperone_DnaJ-domain_superfamily_protein
REFERENCE	evm.model.Ug_unitig_749.5	Uncharacterized protein	noEC	S	noTAIR	NULL
REFERENCE	evm.model.Ug_unitig_748.1548	SEC12-like protein 1	noEC	U	AT3G52190.1	phosphate_transporter_traffic_facilitator1
REFERENCE	evm.model.Ug_unitig_748.1543	vesicle-associated membrane protein 727	noEC	U	AT3G54300.3	vesicle-associated_membrane_protein_727
REFERENCE	evm.model.Ug_unitig_748.1540	Eukaryotic peptide chain release factor subunit 1-3	noEC	J	AT1G12920.1	eukaryotic_release_factor_1-2
REFERENCE	evm.model.Ug_unitig_748.1538	Exocyst subunit Exo70 family protein	noEC	U	AT5G03540.1	exocyst_subunit_exo70_family_protein_A1
TEST	evm.model.Ug_unitig_748.1535	Protein pelota homolog	noEC	J	AT4G27650.3	Eukaryotic_release_factor_1_(eRF1)_family_protein
REFERENCE	evm.model.Ug_unitig_748.1533	Cysteine protease	EC:3.4.22	UZ	AT2G44140.2	Peptidase_family_C54_protein
REFERENCE	evm.model.Ug_unitig_748.1509	Protein arginine N-methyltransferase	EC:2.1.1.125	KO	AT5G49020.1	protein_arginine_methyltransferase_4A
REFERENCE	evm.model.Ug_unitig_748.1503	Pectinesterase	EC:3.1.1.11;EC:3.1.1.1	G	AT5G27870.1	Plant_invertase/pectin_methylesterase_inhibitor_superfamily
REFERENCE	evm.model.Ug_unitig_748.1482	PsbB mRNA maturation factor Mbb1, chloroplastic	noEC	S	AT3G17040.1	high_chlorophyll_fluorescent_107
REFERENCE	evm.model.Ug_unitig_748.1481	Pectinesterase	EC:3.1.1.11;EC:3.1.1.1	G	AT3G17060.1	Pectin_lyase-like_superfamily_protein
TEST	evm.model.Ug_unitig_748.1462	Rubisco accumulation factor 1, chloroplastic	noEC	S	AT3G04550.1	rubisco_accumulation_factor-like_protein
REFERENCE	evm.model.Ug_unitig_748.1458	Putative lysine-specific demethylase jmj16	noEC	K	AT1G08620.3	Transcription_factor_jumonji_(jmj)_family_protein_/_zinc_finger_(C5HC2_type)_family_protein
REFERENCE	evm.model.Ug_unitig_748.1455	probable E3 ubiquitin-protein ligase RHC2A	noEC	O	AT3G46620.1	zinc_finger_(C3HC4-type_RING_finger)_family_protein
REFERENCE	evm.model.Ug_unitig_748.1454	Telomere repeat-binding protein 4-like	noEC	K	AT3G12560.2	TRF-like_9
REFERENCE	evm.model.Ug_unitig_748.1450	protein HYPER-SENSITIVITY-RELATED 4-like	EC:3.6.1.3;EC:3.6.1.15	O	AT3G50930.1	cytochrome_BC1_synthesi
REFERENCE	evm.model.Ug_unitig_748.1430	Histone H3	noEC	B	AT5G10980.1	Histone_superfamily_protein
REFERENCE	evm.model.Ug_unitig_748.1409	NAC domain-containing protein 86-like	noEC	K	AT1G65910.1	NAC_domain_containing_protein_28
TEST	evm.model.Ug_unitig_748.1402	FAD/NAD(P)-binding oxidoreductase family protein	noEC	S	AT5G39940.1	FAD/NAD(P)-binding_oxidoreductase_family_protein
REFERENCE	evm.model.Ug_unitig_748.1401	Pentatricopeptide repeat-containing protein, chloroplastic	noEC	S	AT1G15510.1	Tetratricopeptide_repeat_(TPR)-like_superfamily_protein
REFERENCE	evm.model.Ug_unitig_748.1398	Tubulin alpha chain	EC:3.6.1.15	Z	AT5G19780.1	tubulin_alpha-5
REFERENCE	evm.model.Ug_unitig_748.1394	Vesicle transport v-SNARE 13	noEC	U	AT3G29100.3	vesicle_transport_V-snare_13
REFERENCE	evm.model.Ug_unitig_748.1390	Hexosyltransferase	EC:2.4.1.43	G	AT3G02350.1	galacturonosyltransferase_9
REFERENCE	evm.model.Ug_unitig_748.1389	6-phosphogluconate dehydrogenase, decarboxylating	EC:1.1.1.44	G	AT3G02360.2	6-phosphogluconate_dehydrogenase_family_protein
REFERENCE	evm.model.Ug_unitig_748.1379	probable N-acetyltransferase HLS1	EC:2.3.1.5	S	AT2G23060.1	Acyl-CoA_N-acyltransferases_(NAT)_superfamily_protein
REFERENCE	evm.model.Ug_unitig_748.1324	PHD finger protein ING	EC:3.4.24	B	AT1G54390.4	PHD_finger_protein-like_protein
REFERENCE	evm.model.Ug_unitig_748.1311	NAC domain-containing protein 78-like	noEC	K	AT3G10490.1	NAC_domain_containing_protein_52
REFERENCE	evm.model.Ug_unitig_748.1305	3-ketoacyl-CoA synthase	EC:2.3.1.85	I	AT1G68530.1	3-ketoacyl-CoA_synthase_6
REFERENCE	evm.model.Ug_unitig_748.1302	3-ketoacyl-CoA synthase	EC:2.3.1.85	I	AT1G25450.1	3-ketoacyl-CoA_synthase_5
REFERENCE	evm.model.Ug_unitig_748.1299	3-ketoacyl-CoA synthase	EC:2.3.1.85	I	AT1G68530.1	3-ketoacyl-CoA_synthase_6
REFERENCE	evm.model.Ug_unitig_748.1296	3-ketoacyl-CoA synthase	EC:2.3.1.85	I	AT1G68530.1	3-ketoacyl-CoA_synthase_6
REFERENCE	evm.model.Ug_unitig_748.1292	3-ketoacyl-CoA synthase	EC:2.3.1.85	I	AT1G68530.1	3-ketoacyl-CoA_synthase_6
REFERENCE	evm.model.Ug_unitig_748.1291	3-ketoacyl-CoA synthase	EC:2.3.1.85	I	AT1G25450.1	3-ketoacyl-CoA_synthase_5
TEST	evm.model.Ug_unitig_748.1276	probable glucan 1,3-beta-glucosidase A isoform X1	noEC	G	noTAIR	NULL
TEST	evm.model.Ug_unitig_748.1275	probable glucan 1,3-beta-glucosidase A isoform X2	noEC	G	noTAIR	NULL
REFERENCE	evm.model.Ug_unitig_748.1274	Glabra2 expression modulator	noEC	S	AT2G22475.1	GRAM_domain_family_protein
TEST	evm.model.Ug_unitig_748.1265	HMG-Y-related protein A-like	noEC	B	noTAIR	NULL
REFERENCE	evm.model.Ug_unitig_748.1262	15.7 kDa heat shock protein, peroxisomal	noEC	O	AT5G37670.1	HSP20-like_chaperones_superfamily_protein
TEST	evm.model.Ug_unitig_748.1242	Protein TPX2	noEC	S	AT5G37478.2	TPX2_(targeting_protein_for_Xklp2)_protein_family
REFERENCE	evm.model.Ug_unitig_748.1231	Metalloendoproteinase 2-MMP	EC:3.4.24	O	AT1G70170.1	matrix_metalloproteinase
REFERENCE	evm.model.Ug_unitig_748.1230	beta-glucuronosyltransferase GlcAT14B-like	EC:2.4.1.17	G	AT5G15050.1	Core-2/I-branching_beta-1%2C6-N-acetylglucosaminyltransferase_family_protein
REFERENCE	evm.model.Ug_unitig_748.1225	Tubulin alpha chain	EC:3.6.1.15	Z	AT4G14960.2	Tubulin/FtsZ_family_protein
REFERENCE	evm.model.Ug_unitig_748.1219	Protein TPX2	noEC	S	AT5G15510.1	TPX2_(targeting_protein_for_Xklp2)_protein_family
REFERENCE	evm.model.Ug_unitig_748.1215	Protein LONGIFOLIA 1	noEC	S	AT3G02170.1	longifolia2
TEST	evm.model.Ug_unitig_748.1213	30S ribosomal protein S11, chloroplastic	noEC	J	ATCG00750.1	ribosomal_protein_S11
TEST	evm.model.Ug_unitig_748.1212	Eukaryotic translation initiation factor 3 subunit M	noEC	J	AT5G15610.2	Proteasome_component_(PCI)_domain_protein
REFERENCE	evm.model.Ug_unitig_748.1209	COBRA-like protein	noEC	S	AT5G60920.1	COBRA-like_extracellular_glycosyl-phosphatidyl_inositol-anchored_protein_family
TEST	evm.model.Ug_unitig_748.1207	AUGMIN subunit 5	noEC	S	AT5G38880.1	HAUS_augmin-like_complex_subunit
REFERENCE	evm.model.Ug_unitig_748.1206	Zinc finger protein CONSTANS-LIKE 2	noEC	K	AT3G02380.1	CONSTANS-like_2
REFERENCE	evm.model.Ug_unitig_748.1201	Proteasome maturation factor	noEC	O	AT5G38650.1	Proteasome_maturation_factor_UMP1
REFERENCE	evm.model.Ug_unitig_748.1181	GTP-binding protein OBGC, chloroplastic	EC:3.6.1.15	J	AT5G18570.1	GTP1/OBG_family_protein
TEST	evm.model.Ug_unitig_748.1180	E3 ubiquitin-protein ligase Topors-like isoform X1	noEC	O	AT2G39100.1	RING/U-box_superfamily_protein
REFERENCE	evm.model.Ug_unitig_748.1177	ISWI chromatin-remodeling complex ATPase CHR11	EC:3.6.1.3;EC:3.6.1.15	K	AT5G18620.2	chromatin_remodeling_factor17
REFERENCE	evm.model.Ug_unitig_748.1170	Superoxide dismutase [Cu-Zn]	EC:1.15.1.1	P	AT1G08830.2	copper/zinc_superoxide_dismutase_1
REFERENCE	evm.model.Ug_unitig_748.1165	Protein DMP2	noEC	S	AT3G21520.1	transmembrane_protein%2C_putative_(DUF679_domain_membrane_protein_1)
REFERENCE	evm.model.Ug_unitig_748.1140	Histone acetyltransferase	EC:3.6.1.3;EC:3.6.1.15	S	AT4G14920.2	Acyl-CoA_N-acyltransferase_with_RING/FYVE/PHD-type_zinc_finger_protein
REFERENCE	evm.model.Ug_unitig_748.1137	Protein XRI1	noEC	S	AT5G48720.4	x-ray_induced_transcript_1
REFERENCE	evm.model.Ug_unitig_748.1122	Math domain-containing protein	noEC	S	AT1G04300.1	TRAF-like_superfamily_protein
REFERENCE	evm.model.Ug_unitig_748.1120	Cellulose synthase (UDP-forming)	EC:2.4.1.12	G	AT4G24010.1	cellulose_synthase_like_G1
REFERENCE	evm.model.Ug_unitig_748.1107	Peroxygenase-like	EC:1.14.99.3;EC:1.11.2.3;EC:1.11.1.7	S	AT4G26740.1	peroxygenase_1
REFERENCE	evm.model.Ug_unitig_748.1095	Ammonium transporter	EC:3.1.30;EC:3.1.26;EC:3.1.26.4	P	AT4G13510.1	ammonium_transporter_1%3B1
REFERENCE	evm.model.Ug_unitig_748.1093	Chaperonin CPN60-2, mitochondrial	noEC	O	AT3G23990.1	heat_shock_protein_60
REFERENCE	evm.model.Ug_unitig_748.1090	Pectinesterase	EC:3.1.1.11;EC:3.1.1.1	G	AT3G24130.1	Pectin_lyase-like_superfamily_protein
REFERENCE	evm.model.Ug_unitig_748.1074	vacuolar protein sorting-associated protein 32 homolog 2	noEC	U	AT2G19830.2	SNF7_family_protein
REFERENCE	evm.model.Ug_unitig_748.1069	Armadillo-type fold containing protein	noEC	D	AT4G31880.2	transcriptional_regulator
REFERENCE	evm.model.Ug_unitig_748.1068	Putative ADP-ribosylation factor GTPase-activating protein AGD8	noEC	T	AT5G46750.1	ARF-GAP_domain_9
TEST	evm.model.Ug_unitig_748.1066	Checkpoint 9-1-1 complex, RAD1 component	EC:3.1.11;EC:3.1.15;EC:3.1.11.2	L	AT4G17760.1	PCNA_domain-containing_protein
REFERENCE	evm.model.Ug_unitig_748.1065	SNARE protein PEP12/VAM3/Syntaxin 7/Syntaxin 17	noEC	HMU	noTAIR	NULL
REFERENCE	evm.model.Ug_unitig_748.1063	lysine-specific demethylase JMJ706-like	noEC	K	AT5G46910.1	Transcription_factor_jumonji_(jmj)_family_protein_/_zinc_finger_(C5HC2_type)_family_protein
REFERENCE	evm.model.Ug_unitig_748.1060	Cellulose synthase-like protein d3	EC:2.4.2.24;EC:2.4.1.12	G	AT3G03050.1	cellulose_synthase-like_D3
REFERENCE	evm.model.Ug_unitig_748.1059	Xyloglucan endotransglucosylase/hydrolase	EC:2.4.1.207	G	AT1G32170.1	xyloglucan_endotransglucosylase/hydrolase_30
TEST	evm.model.Ug_unitig_748.1052	transcription factor IIIB 60 kDa subunit-like isoform X1	noEC	K	AT3G09360.3	Cyclin/Brf1-like_TBP-binding_protein
REFERENCE	evm.model.Ug_unitig_748.1047	17.3 kDa class ii heat shock protein	noEC	O	AT5G12020.1	17.6_kDa_class_II_heat_shock_protein
REFERENCE	evm.model.Ug_unitig_748.1046	peroxisome biogenesis factor 10	noEC	O	AT2G26350.1	peroxin_10
REFERENCE	evm.model.Ug_unitig_748.1041	ylmG homolog protein 2, chloroplastic	noEC	S	AT5G21920.1	YGGT_family_protein
REFERENCE	evm.model.Ug_unitig_748.1039	Ankyrin repeat-containing protein	noEC	S	AT5G04690.2	Ankyrin_repeat_family_protein
REFERENCE	evm.model.Ug_unitig_748.1036	RNA-dependent RNA polymerase	EC:2.7.7.48	H	AT3G49500.5	RNA-dependent_RNA_polymerase_6
REFERENCE	evm.model.Ug_unitig_748.1035	RNA-dependent RNA polymerase	EC:2.7.7.48	H	AT3G49500.5	RNA-dependent_RNA_polymerase_6
REFERENCE	evm.model.Ug_unitig_748.1030	Putative clathrin assembly protein	noEC	TU	AT2G25430.1	epsin_N-terminal_homology_(ENTH)_domain-containing_protein_/_clathrin_assembly_protein-like_protein
REFERENCE	evm.model.Ug_unitig_748.1012	Cytochrome b-c1 complex subunit 7	EC:1.10.2;EC:1.10.2.2	C	AT5G25450.1	Cytochrome_bd_ubiquinol_oxidase%2C_14kDa_subunit
REFERENCE	evm.model.Ug_unitig_748.1003	Dna cross-link repair protein snm1	EC:3.1.11;EC:3.1.15	L	AT2G45700.1	sterile_alpha_motif_(SAM)_domain-containing_protein
REFERENCE	evm.model.Ug_unitig_748.987	Glycosyltransferase family protein 64 C3	noEC	GMW	AT1G80290.2	Nucleotide-diphospho-sugar_transferases_superfamily_protein
REFERENCE	evm.model.Ug_unitig_748.975	ATP-dependent DNA helicase	EC:3.6.1.3;EC:3.6.4.12;EC:3.6.1.15	L	AT1G31360.1	RECQ_helicase_L2
REFERENCE	evm.model.Ug_unitig_748.970	Rop guanine nucleotide exchange factor 14	noEC	O	AT1G31650.1	RHO_guanyl-nucleotide_exchange_factor_14
REFERENCE	evm.model.Ug_unitig_748.952	probable polygalacturonase	EC:3.2.1.67;EC:3.2.1.15	G	AT4G23820.1	Pectin_lyase-like_superfamily_protein
REFERENCE	evm.model.Ug_unitig_748.937	T-complex protein 1 subunit gamma	EC:2.7.11	O	AT5G26360.1	TCP-1/cpn60_chaperonin_family_protein
REFERENCE	evm.model.Ug_unitig_748.936	T-complex protein 1 subunit gamma	EC:2.7.11	O	AT5G26360.1	TCP-1/cpn60_chaperonin_family_protein
REFERENCE	evm.model.Ug_unitig_748.914	golgin subfamily A member 6-like protein 22	noEC	none	AT4G32190.1	Myosin_heavy_chain-related_protein
TEST	evm.model.Ug_unitig_748.912	Protein nap1	noEC	S	AT2G35110.2	transcription_activator
REFERENCE	evm.model.Ug_unitig_748.910	Histone H3-K9 methyltransferase	noEC	KL	AT5G44800.1	chromatin_remodeling_4
REFERENCE	evm.model.Ug_unitig_748.905	43kDa postsynaptic protein	noEC	O	AT2G34920.2	RING/U-box_superfamily_protein
REFERENCE	evm.model.Ug_unitig_748.904	brefeldin A-inhibited guanine nucleotide-exchange protein 1	EC:6.1.1.17	U	AT4G38200.1	SEC7-like_guanine_nucleotide_exchange_family_protein
REFERENCE	evm.model.Ug_unitig_748.894	GDP-fucose protein O-fucosyltransferase protein	noEC	G	AT3G21190.1	O-fucosyltransferase_family_protein
REFERENCE	evm.model.Ug_unitig_748.871	nucleosome assembly protein 14 isoform X2	noEC	BD	AT4G26110.1	nucleosome_assembly_protein1%3B1
TEST	evm.model.Ug_unitig_748.868	protein RTF1 homolog	noEC	K	AT1G61040.3	plus-3_domain-containing_protein
TEST	evm.model.Ug_unitig_748.858	Mediator of rna polymerase ii transcription subunit 16	noEC	S	AT4G04920.2	sensitive_to_freezing_6
REFERENCE	evm.model.Ug_unitig_748.818	Ubiquinol oxidase	EC:1.10.3.11;EC:1.10.3	Q	AT4G22260.1	Alternative_oxidase_family_protein
REFERENCE	evm.model.Ug_unitig_748.797	Rho GDP-dissociation inhibitor 1	noEC	T	AT3G07880.1	Immunoglobulin_E-set_superfamily_protein
REFERENCE	evm.model.Ug_unitig_748.793	two-pore potassium channel 1-like	noEC	P	AT5G55630.2	Outward_rectifying_potassium_channel_protein
REFERENCE	evm.model.Ug_unitig_748.764	transcription termination factor MTERF4, chloroplastic	noEC	K	AT4G02990.2	Mitochondrial_transcription_termination_factor_family_protein
REFERENCE	evm.model.Ug_unitig_748.733	SH3 domain-containing protein	noEC	S	AT1G29800.2	RING/FYVE/PHD-type_zinc_finger_family_protein
REFERENCE	evm.model.Ug_unitig_748.727	Putative Seipin family protein	noEC	S	AT1G29760.1	Putative_adipose-regulatory_protein_(Seipin)
REFERENCE	evm.model.Ug_unitig_748.716	Cellulose synthase-like protein D1	EC:2.4.1.12;EC:2.4.2.24	G	AT2G33100.2	cellulose_synthase-like_D1
TEST	evm.model.Ug_unitig_748.714	Eukaryotic translation initiation factor 3 subunit L	noEC	J	AT5G25757.1	RNA_polymerase_I-associated_factor_PAF67
REFERENCE	evm.model.Ug_unitig_748.709	putative clathrin assembly protein At2g25430	noEC	TU	AT4G32285.2	ENTH/ANTH/VHS_superfamily_protein
REFERENCE	evm.model.Ug_unitig_748.706	NADPH-dependent diflavin oxidoreductase 1	EC:1.6.2.4	C	AT3G02280.3	Flavodoxin_family_protein
REFERENCE	evm.model.Ug_unitig_748.700	Protein osb1, mitochondrial	noEC	L	AT1G47720.1	Primosome_PriB/single-strand_DNA-binding_protein
REFERENCE	evm.model.Ug_unitig_748.693	Transcription factor E2FC (Fragment)	noEC	K	AT1G47870.2	winged-helix_DNA-binding_transcription_factor_family_protein
TEST	evm.model.Ug_unitig_748.691	Insulin-induced protein	noEC	S	AT4G01935.1	insulin-induced_protein
REFERENCE	evm.model.Ug_unitig_748.688	filament-like plant protein 4	noEC	S	AT1G19835.6	filament-like_protein_(DUF869)
REFERENCE	evm.model.Ug_unitig_748.673	Phosphopantothenoylcysteine decarboxylase	EC:4.1.1.36	DP	AT3G18030.1	HAL3-like_protein_A
REFERENCE	evm.model.Ug_unitig_748.672	G2/mitotic-specific cyclin-2-like	noEC	D	AT1G76310.1	CYCLIN_B2%3B4
REFERENCE	evm.model.Ug_unitig_748.659	Dynamin-2A like	EC:3.6.1.15	U	AT1G59610.1	dynamin-like_3
REFERENCE	evm.model.Ug_unitig_748.656	Chlorophyll a-b binding protein, chloroplastic	noEC	C	AT4G10340.1	light_harvesting_complex_of_photosystem_II_5
REFERENCE	evm.model.Ug_unitig_748.630	RNA polymerase II transcriptional coactivator KELP	noEC	K	AT4G10920.2	transcriptional_coactivator_p15_(PC4)_family_protein_(KELP)
REFERENCE	evm.model.Ug_unitig_748.629	Peroxisome biogenesis protein 1	EC:3.6.1.3;EC:3.6.1.15	O	AT5G08470.1	peroxisome_1
REFERENCE	evm.model.Ug_unitig_748.615	50S ribosomal protein L21, chloroplastic	noEC	J	AT1G35680.1	Ribosomal_protein_L21
REFERENCE	evm.model.Ug_unitig_748.604	Two-pore potassium channel 3	EC:2.7.6.2	P	AT4G18160.1	Ca2+_activated_outward_rectifying_K+_channel_6
REFERENCE	evm.model.Ug_unitig_748.583	ATP-dependent zinc metalloprotease FTSH 12, chloroplastic	EC:3.4.24;EC:3.6.1.3;EC:3.6.3.52;EC:7.4.2.5;EC:3.6.1.15;EC:3.6.4.3	O	AT1G79560.1	FTSH_protease_12
REFERENCE	evm.model.Ug_unitig_748.576	Serine/threonine-protein kinase AGC1-7	EC:2.7.11	T	AT3G12690.3	AGC_kinase_1.5
REFERENCE	evm.model.Ug_unitig_748.555	Plant UBX domain-containing protein 4	noEC	Y	AT4G04210.1	plant_UBX_domain_containing_protein_4
REFERENCE	evm.model.Ug_unitig_748.550	Autophagy-related protein	noEC	U	AT3G60640.1	Ubiquitin-like_superfamily_protein
TEST	evm.model.Ug_unitig_748.541	UPF0051 protein ABCI8, chloroplastic-like	EC:3.6.1.3;EC:3.6.1.15	O	AT4G04770.1	ATP_binding_cassette_protein_1
TEST	evm.model.Ug_unitig_748.540	UPF0051 protein ABCI8, chloroplastic-like	EC:3.6.1.3;EC:3.6.1.15	O	AT4G04770.1	ATP_binding_cassette_protein_1
REFERENCE	evm.model.Ug_unitig_748.528	myosin-15 isoform X1	EC:3.6.1.3;EC:3.6.1.15	Z	AT4G33200.1	myosin
REFERENCE	evm.model.Ug_unitig_748.523	Putative clathrin assembly protein	noEC	TU	AT2G25430.1	epsin_N-terminal_homology_(ENTH)_domain-containing_protein_/_clathrin_assembly_protein-like_protein
REFERENCE	evm.model.Ug_unitig_748.518	cysteine--tRNA ligase, chloroplastic/mitochondrial	EC:6.1.1.16	J	AT2G31170.1	Cysteinyl-tRNA_synthetase%2C_class_Ia_family_protein
REFERENCE	evm.model.Ug_unitig_748.514	phosphoinositide phosphatase SAC6-like	noEC	I	AT3G51460.1	Phosphoinositide_phosphatase_family_protein
REFERENCE	evm.model.Ug_unitig_748.495	Histone deacetylase 2	EC:3.5.1.98	B	AT5G26040.2	histone_deacetylase_2
REFERENCE	evm.model.Ug_unitig_748.486	Mitochondrial inner membrane protease subunit 2	noEC	OU	AT3G08980.4	Peptidase_S24/S26A/S26B/S26C_family_protein
REFERENCE	evm.model.Ug_unitig_748.485	protein EARLY FLOWERING 3-like	noEC	S	AT2G25930.1	hydroxyproline-rich_glycoprotein_family_protein
REFERENCE	evm.model.Ug_unitig_748.475	Glycosyltransferases	EC:2.4.1.17;EC:2.4.1.135	O	AT1G27600.2	Nucleotide-diphospho-sugar_transferases_superfamily_protein
REFERENCE	evm.model.Ug_unitig_748.473	60S ribosomal protein L11	noEC	J	AT2G42740.1	ribosomal_protein_large_subunit_16A
REFERENCE	evm.model.Ug_unitig_748.472	Syntaxin-32-like protein	noEC	U	AT3G24350.1	syntaxin_of_plants_32
REFERENCE	evm.model.Ug_unitig_748.467	protein RAE1-like	noEC	A	AT1G80670.1	Transducin/WD40_repeat-like_superfamily_protein
TEST	evm.model.Ug_unitig_748.466	Polygalacturonase QRT3	EC:3.2.1.15	S	AT4G20050.7	Pectin_lyase-like_superfamily_protein
TEST	evm.model.Ug_unitig_748.464	protein SUPPRESSOR OF FRI 4 isoform X2	noEC	S	AT1G30970.1	zinc_finger_(C2H2_type)_family_protein
REFERENCE	evm.model.Ug_unitig_748.456	exocyst complex component EXO84B	noEC	U	AT5G49830.1	exocyst_complex_component_84B
REFERENCE	evm.model.Ug_unitig_748.452	V-type proton ATPase catalytic subunit A	EC:3.6.1.3;EC:7.1.2.1;EC:3.6.1.15	C	AT1G78900.2	vacuolar_ATP_synthase_subunit_A
REFERENCE	evm.model.Ug_unitig_748.446	E3 ubiquitin-protein ligase spl2	noEC	O	AT1G54150.1	E3_Ubiquitin_ligase_family_protein
REFERENCE	evm.model.Ug_unitig_748.434	inorganic pyrophosphatase 1-like	EC:3.6.1.1;EC:3.1.3.75	S	AT1G17710.1	Pyridoxal_phosphate_phosphatase-related_protein
TEST	evm.model.Ug_unitig_748.433	hypothetical protein	noEC	D	noTAIR	NULL
REFERENCE	evm.model.Ug_unitig_748.424	Profilin	noEC	Z	AT4G29340.1	profilin_4
REFERENCE	evm.model.Ug_unitig_748.407	Ft-interacting protein 1	noEC	S	AT4G11610.1	C2_calcium/lipid-binding_plant_phosphoribosyltransferase_family_protein
REFERENCE	evm.model.Ug_unitig_748.401	Reticulon-like protein	noEC	U	AT4G11220.1	VIRB2-interacting_protein_2
TEST	evm.model.Ug_unitig_748.375	ABC transporter E family member 2	EC:3.6.1.3;EC:3.6.1.15	C	AT4G19210.1	RNAse_l_inhibitor_protein_2
REFERENCE	evm.model.Ug_unitig_748.371	LRR receptor-like serine/threonine-protein kinase FEI 1	EC:2.7.11	T	AT1G31420.2	Leucine-rich_repeat_protein_kinase_family_protein
REFERENCE	evm.model.Ug_unitig_748.369	G2/Mitotic-specific cyclin A	noEC	D	AT1G44110.1	Cyclin_A1%3B1
TEST	evm.model.Ug_unitig_748.345	Delta(24)-sterol reductase	EC:1.3.1.72	C	AT3G19820.3	cell_elongation_protein_/_DWARF1_/_DIMINUTO_(DIM)
REFERENCE	evm.model.Ug_unitig_748.344	Pentatricopeptide repeat-containing protein, chloroplastic	noEC	S	AT1G30610.2	pentatricopeptide_(PPR)_repeat-containing_protein
REFERENCE	evm.model.Ug_unitig_748.340	Lysine-specific demethylase JMJ18	noEC	K	AT1G30810.3	Transcription_factor_jumonji_(jmj)_family_protein_/_zinc_finger_(C5HC2_type)_family_protein
REFERENCE	evm.model.Ug_unitig_748.336	protein POLLENLESS 3-like	noEC	S	AT4G20900.2	Tetratricopeptide_repeat_(TPR)-like_superfamily_protein
REFERENCE	evm.model.Ug_unitig_748.330	Ammonium transporter	EC:3.1.30;EC:3.1.26;EC:3.1.26.4	P	AT4G13510.1	ammonium_transporter_1%3B1
REFERENCE	evm.model.Ug_unitig_748.324	Glycolipid transfer protein 1	noEC	G	AT2G33470.2	glycolipid_transfer_protein_1
REFERENCE	evm.model.Ug_unitig_748.321	Non-specific serine/threonine protein kinase	EC:2.7.11	T	AT3G23310.1	AGC_(cAMP-dependent%2C_cGMP-dependent_and_protein_kinase_C)_kinase_family_protein
TEST	evm.model.Ug_unitig_748.315	actin-related protein 9	noEC	Z	AT5G43500.2	actin-related_protein_9
REFERENCE	evm.model.Ug_unitig_748.312	Cellulose synthase (UDP-forming)	EC:2.4.1.12	G	AT4G24000.1	cellulose_synthase_like_G2
REFERENCE	evm.model.Ug_unitig_748.311	MATH domain-containing protein At5g43560-like	noEC	S	AT1G04300.1	TRAF-like_superfamily_protein
TEST	evm.model.Ug_unitig_748.302	enhanced ethylene response protein 5	noEC	D	AT2G19560.1	proteasome_family_protein
REFERENCE	evm.model.Ug_unitig_748.297	Protein xri1	noEC	S	AT5G48720.3	x-ray_induced_transcript_1
TEST	evm.model.Ug_unitig_748.294	PP2A regulatory subunit TAP46	noEC	T	AT5G53000.1	2A_phosphatase_associated_protein_of_46_kD
REFERENCE	evm.model.Ug_unitig_748.287	GTPase-activating protein GYP7	noEC	T	AT5G41940.1	Ypt/Rab-GAP_domain_of_gyp1p_superfamily_protein
TEST	evm.model.Ug_unitig_748.274	protein furry homolog-like	noEC	S	AT5G15680.1	ARM_repeat_superfamily_protein
REFERENCE	evm.model.Ug_unitig_748.273	chaperone protein ClpB3, chloroplastic	noEC	O	AT5G15450.1	casein_lytic_proteinase_B3
REFERENCE	evm.model.Ug_unitig_748.271	MRG family protein isoform 1	noEC	BK	AT4G37280.1	MRG_family_protein
TEST	evm.model.Ug_unitig_748.267	Diacylglycerol o-acyltransferase 2	EC:2.3.1.20	I	AT3G51520.1	diacylglycerol_acyltransferase_family
REFERENCE	evm.model.Ug_unitig_748.265	kinesin-like calmodulin-binding protein	EC:3.6.1.3;EC:3.6.4.5;EC:3.6.1.15	Z	AT5G65930.2	kinesin-like_calmodulin-binding_protein_(ZWICHEL)
REFERENCE	evm.model.Ug_unitig_748.260	UTP--glucose-1-phosphate uridylyltransferase	EC:2.7.7.64;EC:2.7.7.9	G	AT5G17310.2	UDP-glucose_pyrophosphorylase_2
REFERENCE	evm.model.Ug_unitig_748.251	Mechanosensitive ion channel protein 2, chloroplastic	noEC	M	AT5G10490.2	MSCS-like_2
REFERENCE	evm.model.Ug_unitig_748.241	Villin-2 like	noEC	Z	AT2G41740.2	villin_2
REFERENCE	evm.model.Ug_unitig_748.239	40S ribosomal protein S15	noEC	J	AT5G09500.1	Ribosomal_protein_S19_family_protein
TEST	evm.model.Ug_unitig_748.233	HAUS augmin-like complex subunit 1	noEC	S	AT2G41350.1	HAUS_augmin-like_complex_subunit
REFERENCE	evm.model.Ug_unitig_748.226	ELMO domain-containing protein A	noEC	S	AT3G03610.3	ELMO/CED-12_family_protein
REFERENCE	evm.model.Ug_unitig_748.221	Villin headpiece	noEC	Z	AT4G30160.4	villin_4
TEST	evm.model.Ug_unitig_748.183	Actin-related protein 2/3 complex subunit 3	noEC	Z	AT1G60430.3	actin-related_protein_C3
REFERENCE	evm.model.Ug_unitig_748.179	Putative clathrin assembly protein At5g35200	EC:1.3.1.74	TU	AT5G35200.2	ENTH/ANTH/VHS_superfamily_protein
TEST	evm.model.Ug_unitig_748.177	Lunapark domain containing protein	noEC	S	AT4G31080.1	integral_membrane_metal-binding_family_protein_(DUF2296)
REFERENCE	evm.model.Ug_unitig_748.151	Xyloglucan endotransglucosylase/hydrolase	EC:2.4.1.207	G	AT1G11545.1	xyloglucan_endotransglucosylase/hydrolase_8
REFERENCE	evm.model.Ug_unitig_748.146	Ent-kaurenoic acid oxidase 1	EC:1.14.13	Q	AT1G05160.2	cytochrome_P450%2C_family_88%2C_subfamily_A%2C_polypeptide_3
REFERENCE	evm.model.Ug_unitig_748.141	Dynamin-related protein 1E-like	EC:3.6.1.15	U	AT3G60190.1	DYNAMIN-like_1E
REFERENCE	evm.model.Ug_unitig_748.127	Peroxisomal membrane protein 11c	noEC	U	AT1G01820.1	peroxin_11c
REFERENCE	evm.model.Ug_unitig_748.124	Lim domain-containing protein plim2c	noEC	TZ	AT3G61230.1	GATA_type_zinc_finger_transcription_factor_family_protein
REFERENCE	evm.model.Ug_unitig_748.122	C-terminal binding protein AN	EC:1.1.1.29	K	AT1G01510.1	NAD(P)-binding_Rossmann-fold_superfamily_protein
REFERENCE	evm.model.Ug_unitig_748.119	Protein LAZ1-like protein 1	noEC	T	AT1G77220.1	organic_solute_transporter_ostalpha_protein_(DUF300)
REFERENCE	evm.model.Ug_unitig_748.111	Gibberellin 20 oxidase 1	EC:1.14.11	Q	AT5G51810.1	gibberellin_20_oxidase_2
REFERENCE	evm.model.Ug_unitig_748.106	Homeobox-leucine zipper protein ATHB-6-like	noEC	K	AT4G40060.1	homeobox_protein_16
REFERENCE	evm.model.Ug_unitig_748.102	GLABRA2 expression modulator-like	noEC	S	AT2G22475.1	GRAM_domain_family_protein
TEST	evm.model.Ug_unitig_748.98	ribonuclease E/G-like protein, chloroplastic isoform X2	noEC	J	AT2G04270.7	RNAse_E/G-like_protein
REFERENCE	evm.model.Ug_unitig_748.93	mitochondrial import receptor subunit TOM20-like	EC:7.4.2.3;EC:7.4.2.4	U	AT3G27080.1	translocase_of_outer_membrane_20_kDa_subunit_3
REFERENCE	evm.model.Ug_unitig_748.67	Kinesin-like protein kca2	EC:3.6.1.3;EC:3.6.4.5;EC:3.6.1.15	Z	AT5G10470.2	kinesin_like_protein_for_actin_based_chloroplast_movement_1
REFERENCE	evm.model.Ug_unitig_748.54	UTP--glucose-1-phosphate uridylyltransferase	EC:2.7.7.64;EC:2.7.7.9	G	AT5G17310.2	UDP-glucose_pyrophosphorylase_2
TEST	evm.model.Ug_unitig_748.50	Nijmegen breakage syndrome 1 protein	noEC	L	AT3G02680.1	nijmegen_breakage_syndrome_1
TEST	evm.model.Ug_unitig_748.28	SNW/SKI-interacting protein-like	noEC	AB	AT1G77180.2	chromatin_protein_family
REFERENCE	evm.model.Ug_unitig_748.14	Putative SGF29 tudor-like domain-containing protein	noEC	S	AT3G27460.1	SGF29_tudor-like_domain-containing_protein
TEST	evm.model.Ug_unitig_748.9	pre-rRNA-processing protein ESF2	noEC	A	AT3G56510.5	RNA-binding_(RRM/RBD/RNP_motifs)_family_protein
REFERENCE	evm.model.Ug_unitig_748.8	ras-related protein RABB1b	EC:3.6.1.15	U	AT4G35860.1	GTP-binding_2
REFERENCE	evm.model.Ug_unitig_747.871	Protein transport protein SEC23	noEC	U	AT2G21630.1	Sec23/Sec24_protein_transport_family_protein
REFERENCE	evm.model.Ug_unitig_747.866	protein TOC75-3, chloroplastic-like	EC:7.4.2.3;EC:7.4.2.4	M	AT3G46740.1	translocon_at_the_outer_envelope_membrane_of_chloroplasts_75-III
TEST	evm.model.Ug_unitig_747.865	Transcription initiation factor IIA large subunit-like	noEC	K	AT1G07470.2	Transcription_factor_IIA%2C_alpha/beta_subunit
REFERENCE	evm.model.Ug_unitig_747.860	Telomere repeat-binding protein 5	noEC	K	AT1G07540.1	TRF-like_2
REFERENCE	evm.model.Ug_unitig_747.857	heterogeneous nuclear ribonucleoprotein 1-like	noEC	A	AT3G13224.2	RNA-binding_(RRM/RBD/RNP_motifs)_family_protein
REFERENCE	evm.model.Ug_unitig_747.850	actin-depolymerizing factor 2	noEC	Z	AT5G59890.1	actin_depolymerizing_factor_4
REFERENCE	evm.model.Ug_unitig_747.836	Vesicle-fusing ATPase	EC:3.6.1.3;EC:3.6.1.15	O	AT4G04910.1	AAA-type_ATPase_family_protein
REFERENCE	evm.model.Ug_unitig_747.831	E3 sumo-protein ligase siz1	noEC	K	AT5G60410.5	DNA-binding_protein_with_MIZ/SP-RING_zinc_finger%2C_PHD-finger_and_SAP_domain-containing_protein
REFERENCE	evm.model.Ug_unitig_747.825	RuvB-like helicase	EC:3.6.1.3;EC:3.6.4.12;EC:3.6.1.15	L	AT5G22330.1	P-loop_containing_nucleoside_triphosphate_hydrolases_superfamily_protein
REFERENCE	evm.model.Ug_unitig_747.823	60S ribosomal protein L12	noEC	J	AT2G37190.1	Ribosomal_protein_L11_family_protein
REFERENCE	evm.model.Ug_unitig_747.803	Serine/threonine protein kinase	EC:2.7.11	T	AT3G53030.1	ser/arg-rich_protein_kinase_4
REFERENCE	evm.model.Ug_unitig_747.802	Serine/threonine protein kinase	EC:2.7.11	T	AT3G44850.1	Protein_kinase_superfamily_protein
REFERENCE	evm.model.Ug_unitig_747.798	Histone deacetylase	EC:3.5.1.98	none	AT3G44750.2	histone_deacetylase_3
TEST	evm.model.Ug_unitig_747.795	protein TIC 100	noEC	S	AT5G22640.1	MORN_(Membrane_Occupation_and_Recognition_Nexus)_repeat-containing_protein
REFERENCE	evm.model.Ug_unitig_747.785	Protein HIRA	noEC	B	AT3G44530.2	histone_chaperone_HIRA-like_protein
TEST	evm.model.Ug_unitig_747.771	plastidal glycolate/glycerate translocator 1, chloroplastic	noEC	M	AT1G32080.1	membrane_protein
TEST	evm.model.Ug_unitig_747.767	histone acetyltransferase MCC1	EC:2.3.1.5;EC:2.3.1.48;EC:2.3.1.88	S	AT5G16800.2	Acyl-CoA_N-acyltransferases_(NAT)_superfamily_protein
REFERENCE	evm.model.Ug_unitig_747.755	LRR receptor-like serine/threonine-protein kinase FEI 1	EC:2.7.11	T	AT1G31420.2	Leucine-rich_repeat_protein_kinase_family_protein
REFERENCE	evm.model.Ug_unitig_747.747	protein KAKU4	noEC	none	AT4G31430.3	flocculation_protein
REFERENCE	evm.model.Ug_unitig_747.746	COP9 signalosome complex subunit 5b-like	EC:3.4.24	OT	AT1G71230.1	COP9-signalosome_5B
REFERENCE	evm.model.Ug_unitig_747.738	Putative monogalactosyldiacylglycerol synthase, chloroplastic	EC:2.4.1.46	M	AT4G31780.2	monogalactosyl_diacylglycerol_synthase_1
REFERENCE	evm.model.Ug_unitig_747.719	Histone-lysine N-methyltransferase, H3 lysine-9 specific SUVH6-like	EC:2.1.1.43	B	AT2G22740.2	SU(VAR)3-9_homolog_6
REFERENCE	evm.model.Ug_unitig_747.715	protein ANTI-SILENCING 1-like	noEC	S	AT5G11470.2	bromo-adjacent_homology_(BAH)_domain-containing_protein
REFERENCE	evm.model.Ug_unitig_747.702	AAA+-type ATPase	EC:3.6.1.3;EC:3.6.1.15;EC:3.6.4.3	O	AT4G28000.1	P-loop_containing_nucleoside_triphosphate_hydrolases_superfamily_protein
TEST	evm.model.Ug_unitig_747.697	Myosin ID heavy chain	EC:3.6.1.3;EC:3.6.1.15	S	AT5G53310.1	myosin_heavy_chain-like_protein
REFERENCE	evm.model.Ug_unitig_747.690	LRR receptor-like serine/threonine-protein kinase RPK2	EC:2.7.11	T	AT3G02130.1	receptor-like_protein_kinase_2
REFERENCE	evm.model.Ug_unitig_747.687	Mitochondrial processing peptidase, beta subunit, and related enzymes (Insulinase superfamily)	EC:3.4.24;EC:1.10.2;EC:1.10.2.2	O	AT3G02090.1	Insulinase_(Peptidase_family_M16)_protein
REFERENCE	evm.model.Ug_unitig_747.686	Hexosyltransferase	EC:2.4.1.43	G	AT3G01040.3	galacturonosyltransferase_13
REFERENCE	evm.model.Ug_unitig_747.680	Tubulin alpha chain	EC:3.6.1.15	Z	AT4G14960.2	Tubulin/FtsZ_family_protein
REFERENCE	evm.model.Ug_unitig_747.679	transcription factor PRE5-like	noEC	K	AT3G28857.1	basic_helix-loop-helix_(bHLH)_DNA-binding_family_protein
REFERENCE	evm.model.Ug_unitig_747.677	Protein arginine methyltransferase NDUFAF7	EC:2.1.1.125	S	AT3G28700.1	NADH_dehydrogenase_ubiquinone_complex_I%2C_assembly_factor-like_protein_(DUF185)
REFERENCE	evm.model.Ug_unitig_747.674	Transcription factor HEX	noEC	K	AT4G40060.1	homeobox_protein_16
REFERENCE	evm.model.Ug_unitig_747.652	Gibberellin 20-oxidase	EC:1.14.11	Q	AT5G51810.1	gibberellin_20_oxidase_2
REFERENCE	evm.model.Ug_unitig_747.651	Gibberellin 20-oxidase	EC:1.14.11	Q	AT1G44090.1	gibberellin_20-oxidase_5
TEST	evm.model.Ug_unitig_747.646	SWR1 complex subunit 2	noEC	S	AT2G36740.1	DNA_binding_protein_SWC2
REFERENCE	evm.model.Ug_unitig_747.637	Actin-1	noEC	Z	AT3G12110.1	actin-11
REFERENCE	evm.model.Ug_unitig_747.633	Ribosomal protein L11	noEC	J	AT4G35490.2	mitochondrial_ribosomal_protein_L11
REFERENCE	evm.model.Ug_unitig_747.632	Dna mismatch repair protein mlh3	EC:3.6.1.3;EC:3.6.1.15	L	AT4G35520.3	MUTL_protein_homolog_3
TEST	evm.model.Ug_unitig_747.617	Chromosome transmission fidelity protein 8, putative isoform 2	noEC	S	AT5G52220.2	chromosome_transmission_fidelity-like_protein
REFERENCE	evm.model.Ug_unitig_747.598	UBP1-associated protein 2A-like	noEC	A	AT2G41060.3	RNA-binding_(RRM/RBD/RNP_motifs)_family_protein
TEST	evm.model.Ug_unitig_747.595	protein DEFECTIVE IN MERISTEM SILENCING 3-like isoform X1	noEC	S	AT3G49250.1	defective_in_meristem_silencing_3
REFERENCE	evm.model.Ug_unitig_747.589	Small heat shock protein, chloroplastic	noEC	O	AT4G27670.1	heat_shock_protein_21
REFERENCE	evm.model.Ug_unitig_747.582	Formin-like protein	noEC	TZ	AT3G25500.1	formin_homology_1
REFERENCE	evm.model.Ug_unitig_747.581	Formin-like protein	noEC	TZ	AT3G25500.1	formin_homology_1
REFERENCE	evm.model.Ug_unitig_747.579	Protein disulfide-isomerase	noEC	S	AT2G31840.2	Thioredoxin_superfamily_protein
REFERENCE	evm.model.Ug_unitig_747.578	Potassium transporter	noEC	P	AT3G02050.1	K+_uptake_transporter_3
REFERENCE	evm.model.Ug_unitig_747.574	protein NEDD1-like isoform X2	noEC	T	AT5G05970.2	Transducin/WD40_repeat-like_superfamily_protein
REFERENCE	evm.model.Ug_unitig_747.567	Eukaryotic translation initiation factor 3 subunit F	noEC	J	AT2G39990.1	eukaryotic_translation_initiation_factor_2
REFERENCE	evm.model.Ug_unitig_747.556	kinesin-like protein KIN12B	EC:3.6.1.3;EC:3.6.1.15;EC:3.6.4.4	Z	AT4G14150.1	phragmoplast-associated_kinesin-related_protein_1
TEST	evm.model.Ug_unitig_747.549	Protein disulfide isomerase pTAC5, chloroplastic	EC:5.3.4.1	S	AT4G13670.1	plastid_transcriptionally_active_5
REFERENCE	evm.model.Ug_unitig_747.541	Cryptochrome 2	EC:4.1.99.3;EC:4.1.99	LT	AT1G04400.2	cryptochrome_2
REFERENCE	evm.model.Ug_unitig_747.535	HMG box protein with ARID/BRIGHT DNA-binding domain isoform 1	noEC	K	AT3G59390.2	glycosyltransferase_family_protein
REFERENCE	evm.model.Ug_unitig_747.531	PHD finger protein ING	noEC	B	AT3G24010.1	RING/FYVE/PHD_zinc_finger_superfamily_protein
REFERENCE	evm.model.Ug_unitig_747.529	MSH1 (Fragment)	EC:3.6.1.3;EC:3.6.1.15	L	AT3G24320.2	MUTL_protein_homolog_1
TEST	evm.model.Ug_unitig_747.528	DNA mismatch repair protein MSH1, mitochondrial isoform X2	EC:3.6.1.3;EC:3.6.1.15	L	AT3G24320.1	MUTL_protein_homolog_1
REFERENCE	evm.model.Ug_unitig_747.510	Fimbrin-1 like	noEC	Z	AT4G26700.4	fimbrin_1
TEST	evm.model.Ug_unitig_747.504	meiotic recombination protein SPO11-1	EC:3.1.31;EC:3.6.1.3;EC:3.1.22;EC:5.99.1.3;EC:3.6.1.15	L	AT3G13170.1	Spo11/DNA_topoisomerase_VI%2C_subunit_A_protein
TEST	evm.model.Ug_unitig_747.503	Meiotic recombination protein SPO11-1	EC:3.1.31;EC:3.6.1.3;EC:3.1.22;EC:5.99.1.3;EC:3.6.1.15	L	AT3G13170.3	Spo11/DNA_topoisomerase_VI%2C_subunit_A_protein
TEST	evm.model.Ug_unitig_747.501	NAD-dependent protein deacetylase SRT1	EC:2.4.2.31	BK	AT5G55760.1	sirtuin_1
TEST	evm.model.Ug_unitig_747.499	WEB family protein	noEC	S	noTAIR	NULL
REFERENCE	evm.model.Ug_unitig_747.492	ADP,ATP carrier protein 3, mitochondrial	noEC	C	AT4G28390.2	ADP/ATP_carrier_3
REFERENCE	evm.model.Ug_unitig_747.486	Transcription activator GLK1	noEC	K	AT2G20570.1	GBFs_pro-rich_region-interacting_factor_1
TEST	evm.model.Ug_unitig_747.423	UV radiation resistance protein/autophagy-related protein 14	EC:2.7.7.6	S	AT4G08540.1	DNA-directed_RNA_polymerase_II_protein
REFERENCE	evm.model.Ug_unitig_747.421	Laccase	EC:1.10.3;EC:1.10.3.2	Q	AT5G09360.1	laccase_14
REFERENCE	evm.model.Ug_unitig_747.380	Protein STAY-GREEN LIKE, chloroplastic	noEC	S	AT1G44000.1	STAY-GREEN-like_protein
TEST	evm.model.Ug_unitig_747.377	ribosome maturation protein SBDS	noEC	J	AT1G43860.1	sequence-specific_DNA_binding_transcription_factor
REFERENCE	evm.model.Ug_unitig_747.374	Histone-lysine N-methyltransferase	EC:2.1.1.43	U	noTAIR	NULL
REFERENCE	evm.model.Ug_unitig_747.373	Histone-lysine N-methyltransferase	EC:2.1.1.43	U	AT1G77300.2	histone-lysine_N-methyltransferase
REFERENCE	evm.model.Ug_unitig_747.353	Histone-lysine n-methyltransferase atx1	EC:2.1.1.43	S	AT1G77800.7	PHD_finger_family_protein
TEST	evm.model.Ug_unitig_747.351	ATP-dependent DNA helicase mph1 isoform X1	EC:3.6.1.3;EC:3.6.4.12;EC:3.6.1.15	A	AT1G35530.1	DEAD/DEAH_box_RNA_helicase_family_protein
TEST	evm.model.Ug_unitig_747.343	Tetratricopeptide-like helical	noEC	S	AT1G22700.2	Tetratricopeptide_repeat_(TPR)-like_superfamily_protein
TEST	evm.model.Ug_unitig_747.329	Protein tic110, chloroplastic	noEC	S	AT1G06950.1	translocon_at_the_inner_envelope_membrane_of_chloroplasts_110
TEST	evm.model.Ug_unitig_747.328	Structure-specific endonuclease subunit SLX1 homolog	EC:3.1.30;EC:3.1.31;EC:3.1.21;EC:3.1.22;EC:3.1.22.4	L	AT2G30350.2	Excinuclease_ABC%2C_C_subunit%2C_N-terminal
REFERENCE	evm.model.Ug_unitig_747.322	26S protease regulatory subunit 6B-like protein	EC:3.6.1.3;EC:3.6.1.15	O	AT5G58290.1	regulatory_particle_triple-A_ATPase_3
REFERENCE	evm.model.Ug_unitig_747.321	60S ribosomal protein L10	noEC	J	AT1G26910.1	Ribosomal_protein_L16p/L10e_family_protein
REFERENCE	evm.model.Ug_unitig_747.311	Mitochondrial import inner membrane translocase subunit Tim9	noEC	U	AT3G46560.1	Tim10/DDP_family_zinc_finger_protein
TEST	evm.model.Ug_unitig_747.298	protein EMBRYO SAC DEVELOPMENT ARREST 3, chloroplastic	EC:1.8.1.8	S	AT2G34860.2	DnaJ/Hsp40_cysteine-rich_domain_superfamily_protein
REFERENCE	evm.model.Ug_unitig_747.292	LAMMER dual specificity kinase	EC:2.7.11	T	AT2G40120.1	Protein_kinase_superfamily_protein
REFERENCE	evm.model.Ug_unitig_747.255	Anthranilate N-benzoyltransferase protein 1	noEC	S	AT1G31490.1	HXXXD-type_acyl-transferase_family_protein
REFERENCE	evm.model.Ug_unitig_747.252	Phospholipid-transporting ATPase	EC:3.6.1.3;EC:7.6.2.1;EC:3.6.1.15	P	AT5G04930.1	aminophospholipid_ATPase_1
TEST	evm.model.Ug_unitig_747.251	DNA gyrase subunit A, chloroplastic/mitochondrial	EC:3.6.1.3;EC:5.99.1.3;EC:3.6.1.15	B	AT3G10690.1	DNA_GYRASE_A
TEST	evm.model.Ug_unitig_747.249	protein IWS1 homolog	noEC	K	AT1G32130.1	Transcription_elongation_factor_(TFIIS)_family_protein
REFERENCE	evm.model.Ug_unitig_747.247	Proteasome component (PCI) domain-containing protein	noEC	O	AT5G45620.1	Proteasome_component_(PCI)_domain_protein
TEST	evm.model.Ug_unitig_747.243	protein LOW PSII ACCUMULATION 3, chloroplastic isoform X2	noEC	S	AT5G48790.1	LOW_PSII_ACCUMULATION_protein_(DUF1995)
TEST	evm.model.Ug_unitig_747.240	Signal recognition particle 19 kDa protein	noEC	U	AT1G48160.2	signal_recognition_particle_19_kDa_protein%2C_putative_/_SRP19
REFERENCE	evm.model.Ug_unitig_747.238	Serine/threonine-protein phosphatase	EC:3.1.3.16	T	AT3G05580.1	Calcineurin-like_metallo-phosphoesterase_superfamily_protein
REFERENCE	evm.model.Ug_unitig_747.228	ATP-dependent DNA helicase	EC:3.6.1.3;EC:3.6.4.12;EC:3.6.1.15	L	AT3G05740.1	RECQ_helicase_l1
REFERENCE	evm.model.Ug_unitig_747.213	exosome complex component RRP41 homolog	EC:2.7.7.56;EC:3.1.13;EC:3.1.15	J	AT3G61620.2	3-5-exoribonuclease_family_protein
TEST	evm.model.Ug_unitig_747.207	centromere protein S-like	noEC	S	AT5G50930.1	Histone_superfamily_protein
TEST	evm.model.Ug_unitig_747.205	mitochondrial import inner membrane translocase subunit Tim16-like	noEC	S	AT5G61880.2	Protein_Transporter%2C_Pam16
TEST	evm.model.Ug_unitig_747.196	putative phosphatidylinositol N-acetylglucosaminyltransferase subunit C	EC:2.4.1.198	I	AT2G34980.1	phosphatidylinositolglycan_synthase_family_protein
TEST	evm.model.Ug_unitig_747.186	Pre-mrna-processing-splicing factor 8a	noEC	A	AT1G80070.1	Pre-mRNA-processing-splicing_factor
REFERENCE	evm.model.Ug_unitig_747.170	26S protease regulatory subunit 6A homolog	EC:3.6.1.3;EC:3.6.1.15	O	AT3G05530.1	regulatory_particle_triple-A_ATPase_5A
REFERENCE	evm.model.Ug_unitig_747.160	zinc finger CCCH domain-containing protein 49-like	noEC	A	AT1G07360.1	CCCH-type_zinc_fingerfamily_protein_with_RNA-binding_domain-containing_protein
REFERENCE	evm.model.Ug_unitig_747.157	nifU-like protein 2, chloroplastic	noEC	O	AT5G49940.1	NIFU-like_protein_2
REFERENCE	evm.model.Ug_unitig_747.152	40S ribosomal protein S28	noEC	J	AT5G64140.1	ribosomal_protein_S28
REFERENCE	evm.model.Ug_unitig_747.131	Putative clathrin assembly protein	noEC	TU	AT1G03050.1	ENTH/ANTH/VHS_superfamily_protein
REFERENCE	evm.model.Ug_unitig_747.127	ATP-dependent Clp protease proteolytic subunit	noEC	O	AT1G49970.1	CLP_protease_proteolytic_subunit_1
REFERENCE	evm.model.Ug_unitig_747.112	phosphatidylinositol/phosphatidylcholine transfer protein SFH8-like isoform X2	noEC	I	AT2G21520.1	Sec14p-like_phosphatidylinositol_transfer_family_protein
TEST	evm.model.Ug_unitig_747.83	N-terminal acetyltransferase A, auxiliary subunit	EC:2.1.1.43	B	AT1G26760.1	SET_domain_protein_35
REFERENCE	evm.model.Ug_unitig_747.79	Uncharacterized protein	noEC	S	AT1G09157.1	transmembrane_protein%2C_putative_(DUF679)
REFERENCE	evm.model.Ug_unitig_747.33	40S ribosomal protein SA	noEC	J	AT3G04770.2	40s_ribosomal_protein_SA_B
REFERENCE	evm.model.Ug_unitig_747.12	Glyceraldehyde-3-phosphate dehydrogenase	EC:1.2.1.59;EC:1.2.1.12	G	AT1G12900.5	glyceraldehyde_3-phosphate_dehydrogenase_A_subunit_2
REFERENCE	evm.model.Ug_unitig_747.5	Pectinesterase	EC:3.1.1.11;EC:3.1.1.1	G	AT5G49180.1	Plant_invertase/pectin_methylesterase_inhibitor_superfamily
REFERENCE	evm.model.Ug_unitig_747.4	Pectinesterase	EC:3.1.1.11;EC:3.1.1.1	G	AT3G05610.1	Plant_invertase/pectin_methylesterase_inhibitor_superfamily
REFERENCE	evm.model.Ug_unitig_747.2	HIG_1_N domain-containing protein	noEC	S	AT5G27760.1	Hypoxia-responsive_family_protein
TEST	evm.model.Ug_unitig_746.333	Mitotic-spindle organizing protein 1B	noEC	S	AT4G09550.2	AtGCP3_interacting_protein_1
REFERENCE	evm.model.Ug_unitig_746.331	Hemiasterlin resistant protein 1	noEC	S	AT5G09570.1	Cox19-like_CHCH_family_protein
REFERENCE	evm.model.Ug_unitig_746.327	Actin 7	noEC	Z	AT5G09810.1	actin_7
REFERENCE	evm.model.Ug_unitig_746.323	Endoglucanase	EC:3.2.1.4	G	AT1G70710.1	glycosyl_hydrolase_9B1
REFERENCE	evm.model.Ug_unitig_746.322	HMG-Y-related protein A	noEC	K	AT1G14900.1	high_mobility_group_A
REFERENCE	evm.model.Ug_unitig_746.311	ubiquitin domain-containing protein DSK2a-like	noEC	O	AT2G17200.1	ubiquitin_family_protein
REFERENCE	evm.model.Ug_unitig_746.303	DExH-box ATP-dependent RNA helicase	EC:3.6.1.3;EC:3.6.4.13;EC:3.6.1.15	A	AT1G48650.1	DEA(D/H)-box_RNA_helicase_family_protein
REFERENCE	evm.model.Ug_unitig_746.300	probable protein phosphatase 2C 34	EC:3.1.3.16	T	AT3G05640.3	Protein_phosphatase_2C_family_protein
REFERENCE	evm.model.Ug_unitig_746.293	Phospholipid-transporting ATPase	EC:3.6.1.3;EC:7.6.2.1;EC:3.6.1.15	P	AT5G04930.1	aminophospholipid_ATPase_1
REFERENCE	evm.model.Ug_unitig_746.292	Phospholipid-transporting ATPase	EC:3.6.1.3;EC:7.6.2.1;EC:3.6.1.15	P	AT5G04930.1	aminophospholipid_ATPase_1
REFERENCE	evm.model.Ug_unitig_746.281	Signal recognition particle 43 kDa protein, chloroplastic	noEC	S	AT2G47450.1	chloroplast_signal_recognition_particle_component_(CAO)
REFERENCE	evm.model.Ug_unitig_746.279	E3 ubiquitin-protein ligase CCNB1IP1 homolog isoform X5	noEC	S	AT1G53490.2	RING/U-box_superfamily_protein
REFERENCE	evm.model.Ug_unitig_746.276	Phosphoenolpyruvate carboxylase	EC:4.1.1.31;EC:4.1.1.32	O	AT3G14940.2	phosphoenolpyruvate_carboxylase_3
REFERENCE	evm.model.Ug_unitig_746.275	Phosphoenolpyruvate carboxylase	EC:1.3.1.74;EC:4.1.1.31;EC:4.1.1.32	C	AT3G14940.2	phosphoenolpyruvate_carboxylase_3
REFERENCE	evm.model.Ug_unitig_746.267	myosin-2-like isoform X1	EC:3.6.1.3;EC:3.6.1.15	Z	AT5G54280.2	myosin_2
REFERENCE	evm.model.Ug_unitig_746.263	beta-glucuronosyltransferase GlcAT14A-like	noEC	G	AT3G24040.1	Core-2/I-branching_beta-1%2C6-N-acetylglucosaminyltransferase_family_protein
REFERENCE	evm.model.Ug_unitig_746.238	Pectinesterase	EC:3.1.1.11;EC:3.1.1.1	G	AT5G20860.2	Plant_invertase/pectin_methylesterase_inhibitor_superfamily
REFERENCE	evm.model.Ug_unitig_746.237	Pectinesterase	EC:3.1.1.11;EC:3.1.1.1	G	AT5G20860.2	Plant_invertase/pectin_methylesterase_inhibitor_superfamily
REFERENCE	evm.model.Ug_unitig_746.220	Small nuclear ribonucleoprotein G	noEC	A	AT3G11500.2	Small_nuclear_ribonucleoprotein_family_protein
REFERENCE	evm.model.Ug_unitig_746.219	Probable cytosolic iron-sulfur protein assembly protein CIAO1 homolog	noEC	S	AT2G26060.1	Transducin/WD40_repeat-like_superfamily_protein
REFERENCE	evm.model.Ug_unitig_746.206	Syntaxin/epimorphin, conserved site-containing protein	noEC	U	AT3G09740.1	syntaxin_of_plants_71
REFERENCE	evm.model.Ug_unitig_746.198	25.3 kDa vesicle transport protein	noEC	U	AT1G11890.1	Synaptobrevin_family_protein
REFERENCE	evm.model.Ug_unitig_746.194	CLIP-associated protein	noEC	S	AT2G20190.1	CLIP-associated_protein
REFERENCE	evm.model.Ug_unitig_746.171	E3 ubiquitin-protein ligase RING1	noEC	O	AT3G46620.1	zinc_finger_(C3HC4-type_RING_finger)_family_protein
REFERENCE	evm.model.Ug_unitig_746.162	Phospholipase A-2-activating protein	noEC	I	AT3G18860.1	transducin_family_protein_/_WD-40_repeat_family_protein
REFERENCE	evm.model.Ug_unitig_746.132	Xyloglucan endotransglucosylase/hydrolase	EC:2.4.1.207	G	AT4G25810.1	xyloglucan_endotransglycosylase_6
REFERENCE	evm.model.Ug_unitig_746.129	Putative ADP-ribosylation factor GTPase-activating protein AGD5	noEC	T	AT5G54310.1	ARF-GAP_domain_5
REFERENCE	evm.model.Ug_unitig_746.127	lysine-specific histone demethylase 1 homolog 2	EC:1.5.3.17;EC:1.5.3.16;EC:1.5.3.13	Q	AT3G13682.1	LSD1-like2
REFERENCE	evm.model.Ug_unitig_746.125	Tyrosine aminotransferase	EC:4.4.1.8;EC:2.6.1.5	E	AT5G36160.1	Tyrosine_transaminase_family_protein
REFERENCE	evm.model.Ug_unitig_746.124	protein NUCLEAR FUSION DEFECTIVE 6, chloroplastic/mitochondrial-like isoform X2	noEC	S	AT2G33847.1	hypothetical_protein
REFERENCE	evm.model.Ug_unitig_746.123	transcription activator GLK1	noEC	K	AT2G20570.1	GBFs_pro-rich_region-interacting_factor_1
REFERENCE	evm.model.Ug_unitig_746.118	ATP-dependent zinc metalloprotease FTSH 2, chloroplastic	EC:3.4.24;EC:3.6.1.3;EC:3.6.1.15;EC:3.6.4.3	O	AT2G30950.3	FtsH_extracellular_protease_family
TEST	evm.model.Ug_unitig_746.105	polycomb group protein FERTILIZATION-INDEPENDENT ENDOSPERM-like	noEC	K	AT3G20740.1	Transducin/WD40_repeat-like_superfamily_protein
REFERENCE	evm.model.Ug_unitig_746.104	Acetyl-coa acetyltransferase, cytosolic 1	EC:2.3.1.16;EC:2.3.1.9	I	AT5G47720.4	Thiolase_family_protein
TEST	evm.model.Ug_unitig_746.100	Nuclear pore complex protein	noEC	S	AT2G05120.2	Nucleoporin%2C_Nup133/Nup155-like_protein
TEST	evm.model.Ug_unitig_746.85	DNA excision repair protein ERCC-1	EC:3.1.30;EC:3.1.21	L	AT3G05210.1	nucleotide_repair_protein
REFERENCE	evm.model.Ug_unitig_746.53	fructokinase-like 1, chloroplastic	EC:2.7.1.4;EC:2.7.1.1	G	AT3G54090.1	fructokinase-like_1
TEST	evm.model.Ug_unitig_746.48	26S proteasome non-ATPase regulatory subunit 9	noEC	O	AT5G57950.1	26S_proteasome_regulatory_subunit
REFERENCE	evm.model.Ug_unitig_746.45	inner membrane protein PPF-1, chloroplastic	noEC	OU	AT2G28800.1	63_kDa_inner_membrane_family_protein
TEST	evm.model.Ug_unitig_746.36	Mitochondrial import inner membrane translocase subunit TIM44-2	EC:3.6.1.3;EC:7.4.2.3;EC:7.4.2.4;EC:7.4.2.5;EC:3.6.1.15	U	AT2G36070.1	translocase_inner_membrane_subunit_44-2
TEST	evm.model.Ug_unitig_746.25	leucine aminopeptidase 2, chloroplastic	EC:3.4.11;EC:3.4.13	E	AT2G24200.2	Cytosol_aminopeptidase_family_protein
REFERENCE	evm.model.Ug_unitig_744.664	cell division protein FtsZ homolog 2-1, chloroplastic-like	EC:3.6.1.15	D	AT3G52750.3	Tubulin/FtsZ_family_protein
REFERENCE	evm.model.Ug_unitig_744.663	Cell division protein FtsZ	EC:3.6.1.15	D	AT2G36250.3	Tubulin/FtsZ_family_protein
REFERENCE	evm.model.Ug_unitig_744.658	Transcription termination factor like	noEC	K	AT4G38160.4	Mitochondrial_transcription_termination_factor_family_protein
TEST	evm.model.Ug_unitig_744.647	Telomere repeat-binding factor like-protein	noEC	K	AT1G72650.1	TRF-like_6
REFERENCE	evm.model.Ug_unitig_744.643	interactor of constitutive active ROPs 2, chloroplastic-like isoform X1	noEC	S	noTAIR	NULL
REFERENCE	evm.model.Ug_unitig_744.642	interactor of constitutive active ROPs 2, chloroplastic-like	noEC	S	AT5G60210.5	ROP_interactive_partner_5
REFERENCE	evm.model.Ug_unitig_744.620	20 kDa chaperonin, chloroplastic-like	noEC	O	AT5G20720.4	chaperonin_20
TEST	evm.model.Ug_unitig_744.614	proteasome assembly chaperone 4	noEC	F	AT1G48170.1	proteasome_assembly_chaperone
REFERENCE	evm.model.Ug_unitig_744.596	transcription factor MYB1R1-like isoform X2	noEC	K	AT5G47390.1	myb-like_transcription_factor_family_protein
REFERENCE	evm.model.Ug_unitig_744.591	preprotein translocase subunit SCY2, chloroplastic-like	noEC	U	AT2G31530.1	SecY_protein_transport_family_protein
REFERENCE	evm.model.Ug_unitig_744.579	Histone-lysine N-methyltransferase family member SUVH9-like	EC:2.1.1.43	B	AT4G13460.2	SU(VAR)3-9_homolog_9
REFERENCE	evm.model.Ug_unitig_744.551	Glycosyltransferase	noEC	G	AT4G01770.2	rhamnogalacturonan_xylosyltransferase_1
TEST	evm.model.Ug_unitig_744.542	Exocyst complex component SEC5	noEC	U	AT1G21170.1	Exocyst_complex_component_SEC5
REFERENCE	evm.model.Ug_unitig_744.541	U6 snRNA-associated Sm-like protein LSm3	noEC	A	AT1G76860.1	Small_nuclear_ribonucleoprotein_family_protein
REFERENCE	evm.model.Ug_unitig_744.536	ubinuclein-1-like isoform X2	noEC	S	AT1G77310.1	wound-responsive_family_protein
REFERENCE	evm.model.Ug_unitig_744.523	protein kinase PINOID	EC:2.7.11	T	AT2G34650.1	Protein_kinase_superfamily_protein
REFERENCE	evm.model.Ug_unitig_744.503	myb family transcription factor EFM	noEC	K	AT2G03500.1	Homeodomain-like_superfamily_protein
REFERENCE	evm.model.Ug_unitig_744.488	Putative WD repeat-containing protein C2A9.03 isoform A	EC:3.6.1.3;EC:3.6.1.15;EC:3.6.4.3	S	AT3G13340.3	Transducin/WD40_repeat-like_superfamily_protein
REFERENCE	evm.model.Ug_unitig_744.487	Ammonium transporter	EC:3.1.30;EC:3.1.26;EC:3.1.26.4	P	AT4G13510.1	ammonium_transporter_1%3B1
TEST	evm.model.Ug_unitig_744.486	2-dehydro-3-deoxyphosphooctonate aldolase	EC:2.5.1.55	M	AT1G79500.4	Aldolase-type_TIM_barrel_family_protein
REFERENCE	evm.model.Ug_unitig_744.480	WPP domain-interacting protein 1	noEC	S	noTAIR	NULL
REFERENCE	evm.model.Ug_unitig_744.478	WD-40 repeat-containing protein MSI4-like	EC:2.3.1.5;EC:2.3.1.48	B	AT2G19520.1	Transducin_family_protein_/_WD-40_repeat_family_protein
REFERENCE	evm.model.Ug_unitig_744.476	GrpE protein homolog	noEC	O	AT4G26780.1	Co-chaperone_GrpE_family_protein
REFERENCE	evm.model.Ug_unitig_744.472	exopolygalacturonase clone GBGE184	EC:3.2.1.15	G	AT1G02790.1	polygalacturonase_4
REFERENCE	evm.model.Ug_unitig_744.470	Histone H2A	noEC	B	AT1G54690.1	gamma_histone_variant_H2AX
REFERENCE	evm.model.Ug_unitig_744.458	DNA mismatch repair protein MSH4	EC:3.6.1.3;EC:3.6.1.15	L	AT4G17380.1	MUTS-like_protein_4
REFERENCE	evm.model.Ug_unitig_744.455	Phosphatidylserine decarboxylase proenzyme 1, mitochondrial	EC:3.4.24;EC:4.1.1.65	I	AT4G16700.1	phosphatidylserine_decarboxylase_1
REFERENCE	evm.model.Ug_unitig_744.450	Protein arginine N-methyltransferase	EC:2.1.1.125	Q	AT4G16570.1	protein_arginine_methyltransferase_7
TEST	evm.model.Ug_unitig_744.444	Histone deacetylase 6	EC:3.5.1.98	K	AT2G14825.1	histone_deacetylase-like_protein
REFERENCE	evm.model.Ug_unitig_744.443	acyl-protein thioesterase 1 homolog 1-like	EC:3.1.2.22;EC:3.1.1.5;EC:3.1.1.1	I	AT1G52700.3	alpha/beta-Hydrolases_superfamily_protein
REFERENCE	evm.model.Ug_unitig_744.435	probable ATP-dependent DNA helicase DDX11	EC:3.6.1.3;EC:3.6.1.15	L	AT1G79890.4	RAD3-like_DNA-binding_helicase_protein
REFERENCE	evm.model.Ug_unitig_744.434	probable ATP-dependent DNA helicase DDX11	EC:3.6.1.3;EC:3.6.4.12;EC:3.6.1.15	L	AT1G79890.1	RAD3-like_DNA-binding_helicase_protein
REFERENCE	evm.model.Ug_unitig_744.425	Lon protease homolog 2, peroxisomal	EC:3.4.21;EC:3.6.1.3;EC:3.6.1.15	O	AT5G47040.1	lon_protease_2
TEST	evm.model.Ug_unitig_744.400	AP-3 complex subunit delta	noEC	U	AT1G48760.3	delta-adaptin
TEST	evm.model.Ug_unitig_744.394	AUGMIN subunit 4-like isoform X1	noEC	S	AT1G50710.1	HAUS_augmin-like_complex_subunit
REFERENCE	evm.model.Ug_unitig_744.393	Rac-like GTP-binding protein 3	EC:3.6.1.15	S	AT3G48040.1	RHO-related_protein_from_plants_10
TEST	evm.model.Ug_unitig_744.390	Eukaryotic translation initiation factor 3 subunit C	noEC	J	AT3G56150.2	eukaryotic_translation_initiation_factor_3C
REFERENCE	evm.model.Ug_unitig_744.372	Mitochondrial import inner membrane translocase subunit Tim9	noEC	U	AT3G46560.1	Tim10/DDP_family_zinc_finger_protein
REFERENCE	evm.model.Ug_unitig_744.371	protein LONGIFOLIA 2-like	noEC	S	AT1G74160.1	LONGIFOLIA_protein
REFERENCE	evm.model.Ug_unitig_744.367	Glycosyltransferases	EC:2.4.1.17;EC:2.4.1.135	O	AT5G67230.1	Nucleotide-diphospho-sugar_transferases_superfamily_protein
REFERENCE	evm.model.Ug_unitig_744.366	phosphatidylinositol 3,4,5-trisphosphate 3-phosphatase and protein-tyrosine-phosphatase PTEN2A-like	EC:3.1.3.16;EC:3.1.3.48;EC:3.1.3.67	T	AT3G19420.1	PTEN_2
REFERENCE	evm.model.Ug_unitig_744.360	AUGMIN subunit 6-like	noEC	S	AT5G40740.1	HAUS_augmin-like_complex_subunit
REFERENCE	evm.model.Ug_unitig_744.342	Protein transport protein sec13-like b	noEC	U	AT2G30050.1	transducin_family_protein_/_WD-40_repeat_family_protein
REFERENCE	evm.model.Ug_unitig_744.338	Pentatricopeptide repeat-containing protein, chloroplastic	noEC	S	AT5G39980.1	Tetratricopeptide_repeat_(TPR)-like_superfamily_protein
REFERENCE	evm.model.Ug_unitig_744.336	Protein CDI	noEC	none	AT1G64980.2	Nucleotide-diphospho-sugar_transferases_superfamily_protein
REFERENCE	evm.model.Ug_unitig_744.333	Nuclear pore complex protein like	noEC	U	AT1G52380.4	NUP50_(Nucleoporin_50_kDa)_protein
REFERENCE	evm.model.Ug_unitig_744.314	Hsp70-Hsp90 organizing protein 2	noEC	O	AT1G62740.1	stress-inducible_protein
REFERENCE	evm.model.Ug_unitig_744.313	Protein phosphatase 2c 29	EC:3.1.3.16	T	AT2G35350.1	poltergeist_like_1
REFERENCE	evm.model.Ug_unitig_744.312	Protein phosphatase 2c 29	EC:3.1.3.16	T	AT2G35350.1	poltergeist_like_1
REFERENCE	evm.model.Ug_unitig_744.283	Rop guanine nucleotide exchange factor 1	noEC	G	AT4G38430.1	rho_guanyl-nucleotide_exchange_factor_1
TEST	evm.model.Ug_unitig_744.282	F-box protein skip23	EC:3.6.1.3;EC:3.6.4.12;EC:3.6.1.15	S	AT2G17030.1	F-box_SKIP23-like_protein_(DUF295)
REFERENCE	evm.model.Ug_unitig_744.279	Translation initiation factor IF-3 like	noEC	J	AT1G34360.3	translation_initiation_factor_3_(IF-3)_family_protein
REFERENCE	evm.model.Ug_unitig_744.264	Triosephosphate isomerase, chloroplastic	EC:5.3.1.1	G	AT2G21170.3	triosephosphate_isomerase
REFERENCE	evm.model.Ug_unitig_744.258	V-type proton ATPase subunit a	EC:7.1.3.1;EC:3.6.1.3;EC:7.1.2.1;EC:3.6.1.15	P	AT4G39080.1	vacuolar_proton_ATPase_A3
TEST	evm.model.Ug_unitig_744.251	Eukaryotic translation initiation factor 6	noEC	J	AT3G55620.1	Translation_initiation_factor_IF6
REFERENCE	evm.model.Ug_unitig_744.237	Pentatricopeptide repeat-containing protein	noEC	S	AT2G15820.1	endonuclease
REFERENCE	evm.model.Ug_unitig_744.195	Histone H3	noEC	B	AT5G65360.1	Histone_superfamily_protein
REFERENCE	evm.model.Ug_unitig_744.170	Tubulin beta chain	EC:3.6.1.15	Z	AT5G12250.1	beta-6_tubulin
REFERENCE	evm.model.Ug_unitig_744.169	stomatal closure-related actin-binding protein 3-like	noEC	S	AT2G40820.2	stomatal_closure_actin-binding-like_protein
TEST	evm.model.Ug_unitig_744.163	splicing factor 3B subunit 1	noEC	A	AT5G64270.1	splicing_factor
REFERENCE	evm.model.Ug_unitig_744.142	Homogentisate phytyltransferase	noEC	H	AT2G18950.1	homogentisate_phytyltransferase_1
REFERENCE	evm.model.Ug_unitig_744.137	Preprotein translocase subunit SECY, chloroplastic	noEC	U	AT2G18710.1	SECY_homolog_1
REFERENCE	evm.model.Ug_unitig_744.127	Pentatricopeptide repeat-containing protein	noEC	S	AT1G25360.1	Pentatricopeptide_repeat_(PPR)_superfamily_protein
REFERENCE	evm.model.Ug_unitig_744.113	RNA-binding protein 38	noEC	A	AT1G22330.1	RNA-binding_(RRM/RBD/RNP_motifs)_family_protein
REFERENCE	evm.model.Ug_unitig_744.97	bromodomain-containing protein 9-like	noEC	S	AT1G20670.1	DNA-binding_bromodomain-containing_protein
REFERENCE	evm.model.Ug_unitig_744.92	AT-hook motif nuclear-localized protein	noEC	K	AT1G76500.1	Putative_AT-hook_DNA-binding_family_protein
REFERENCE	evm.model.Ug_unitig_744.90	Small nuclear ribonucleoprotein Sm D1	noEC	A	AT4G02840.1	Small_nuclear_ribonucleoprotein_family_protein
REFERENCE	evm.model.Ug_unitig_744.67	NAC domain-containing protein 8	noEC	K	AT1G28470.1	NAC_domain_containing_protein_10
REFERENCE	evm.model.Ug_unitig_744.61	50S ribosomal protein L11, chloroplastic	noEC	J	AT1G32990.1	plastid_ribosomal_protein_l11
TEST	evm.model.Ug_unitig_744.48	Crossover junction endonuclease MUS81	EC:3.1.31;EC:3.1.22;EC:3.1.22.4	L	AT4G30870.1	Restriction_endonuclease%2C_type_II-like_superfamily_protein
REFERENCE	evm.model.Ug_unitig_744.44	Expansin	noEC	S	AT1G69530.2	expansin_A1
TEST	evm.model.Ug_unitig_744.26	Mediator of RNA polymerase II transcription subunit 18	noEC	K	AT2G22370.1	mediator_of_RNA_polymerase_II_transcription_subunit
TEST	evm.model.Ug_unitig_744.18	type 2 DNA topoisomerase 6 subunit B-like	EC:3.6.1.3;EC:5.99.1.3;EC:3.6.1.15	none	AT1G60460.2	hypothetical_protein
REFERENCE	evm.model.Ug_unitig_744.8	multidrug resistance protein 2-like	noEC	G	AT4G36790.1	Major_facilitator_superfamily_protein
TEST	evm.model.Ug_unitig_736.674	Transcription factor IIIB 50 kDa subunit	noEC	K	AT4G35540.1	POLLEN-EXPRESSED_TRANSCRIPTION_FACTOR_2
TEST	evm.model.Ug_unitig_736.664	vacuolar protein sorting-associated protein 51 homolog	noEC	S	AT4G02030.1	Vps51/Vps67_family_(components_of_vesicular_transport)_protein
TEST	evm.model.Ug_unitig_736.659	SWR1-complex protein 4	noEC	BK	AT2G47210.3	myb-like_transcription_factor_family_protein
[truncated: 8,777 more rows]

## Sheet: Urenif DISPERSED
Tags	GO ID	GO Name	GO Category	FDR	P-Value	Nr Test	Nr Reference	Non Annot Test	Non Annot Reference
[truncated: 4,076 more rows]

[truncated: 9 more sheets: Ugibba DISPERSED, Urenif PROXIMAL, Ugibba PROXIMAL, Urenif TANDEM, Ugibba TANDEM, Urenif SEGMENTAL, Ugibba SEGMENTAL, Urenif TANDEM+PROXIMAL, Ugibba TANDEM+PROXIMAL]
