# Supplementary material for: The Terrestrial Carnivorous Plant Utricularia reniformis Sheds Light on Environmental and Life-Form Genome Plasticity
Source: Int J Mol Sci. 2019 Dec 18;21(1):3. doi: 10.3390/ijms21010003 (PMC6982007; doi:10.3390/ijms21010003)
Supplement: Supplementary file 1 [file ijms-21-00003-s001.zip › Supplementary_tableS8.xls]

## Sheet: Urenif SINGLETONS
Tags	Annotation	FDR	P-Value	Nr Test	Nr Reference	Non Annot Test	Non Annot Reference
[OVER]	EC:7.1.1.2	5.01133950678081E-6	7.4022740129701775E-9	15	33	1386	26317
TEST	evm.model.scaffold1015_size24410.1	NADH-ubiquinone oxidoreductase chain 1	EC:7.1.1.2;EC:1.6.99.5;EC:1.6.99.3	C	ATMG01275.1	NADH_dehydrogenase_1A
TEST	evm.model.scaffold515_size186375.31	NADH dehydrogenase [ubiquinone] 1 alpha subcomplex subunit 6-like	EC:5.2.1.8;EC:7.1.1.2;EC:1.6.99.5;EC:1.6.99.3	C	AT3G12260.1	LYR_family_of_Fe/S_cluster_biogenesis_protein
TEST	evm.model.scaffold447_size226588.41	NADH:ubiquinone reductase (H(+)-translocating)	EC:7.1.1.2;EC:1.6.99.5;EC:1.6.99.3	none	AT3G57785.1	ESSS_subunit_of_NADH:ubiquinone_oxidoreductase_(complex_I)_protein
TEST	evm.model.scaffold240_size406237.33	NADH dehydrogenase subunit B (Fragment)	EC:7.1.1.2;EC:1.6.99.5;EC:1.6.99.3	C	ATCG01250.1	NADH-quinone_oxidoreductase_protein
TEST	evm.model.scaffold182_size489013.80	NADH dehydrogenase [ubiquinone] 1 alpha subcomplex subunit 9, mitochondrial	EC:7.1.1.2;EC:1.6.99.5;EC:1.6.99.3	C	AT2G20360.1	NAD(P)-binding_Rossmann-fold_superfamily_protein
TEST	evm.model.scaffold168_size520293.44	Nadh dehydrogenase [ubiquinone] iron-sulfur protein 7, mitochondrial	EC:7.1.1.2;EC:1.6.99.5;EC:1.6.99.3	C	AT5G11770.1	NADH-ubiquinone_oxidoreductase_20_kDa_subunit
TEST	evm.model.scaffold147_size561064.35	NADH dehydrogenase [ubiquinone] 1 alpha subcomplex subunit 12	EC:7.1.1.2;EC:1.6.99.5;EC:1.6.99.3	C	AT3G03100.1	NADH:ubiquinone_oxidoreductase%2C_17.2kDa_subunit
TEST	evm.model.scaffold106_size656854.56	NADH dehydrogenase [ubiquinone] 1 alpha subcomplex subunit 8-B like	EC:7.1.1.2;EC:1.6.99.5;EC:1.6.99.3	C	AT5G18800.2	Cox19-like_CHCH_family_protein
TEST	evm.model.scaffold70_size835982.171	NADH dehydrogenase subunit 4	EC:7.1.1.2;EC:1.6.99.5;EC:1.6.99.3	C	noTAIR	NULL
TEST	evm.model.scaffold70_size835982.78	NADH dehydrogenase [ubiquinone] 1 alpha subcomplex subunit 12	EC:7.1.1.2;EC:1.6.99.5;EC:1.6.99.3	U	AT4G26965.1	NADH:ubiquinone_oxidoreductase%2C_17.2kDa_subunit
TEST	evm.model.scaffold58_size900371.86	NADH dehydrogenase [ubiquinone] iron-sulfur protein 4, mitochondrial	EC:7.1.1.2;EC:1.6.99.5;EC:1.6.99.3	C	AT5G67590.1	NADH-ubiquinone_oxidoreductase-like_protein
TEST	evm.model.scaffold33_size1110170.28	Nadh dehydrogenase [ubiquinone] 1 alpha subcomplex subunit 1	EC:7.1.1.2;EC:1.6.99.5;EC:1.6.99.3	S	AT3G08610.1	NADH_dehydrogenase_ubiquinone_1_alpha_subcomplex_subunit
TEST	evm.model.scaffold31_size1122664.156	NADH dehydrogenase [ubiquinone] iron-sulfur protein 1, mitochondrial	EC:7.1.1.2;EC:1.6.99.5;EC:1.6.99.3	C	AT5G37510.2	NADH-ubiquinone_dehydrogenase
TEST	evm.model.scaffold19_size1367837.54	NADH dehydrogenase [ubiquinone] 1 alpha subcomplex subunit 2-like	EC:7.1.1.2;EC:1.6.99.5;EC:1.6.99.3	C	AT5G47890.1	NADH-ubiquinone_oxidoreductase_B8_subunit
TEST	evm.model.scaffold18_size1404391.84	Outer envelope pore protein 16-3, chloroplastic/mitochondrial	EC:7.1.1.2;EC:1.6.99.5;EC:1.6.99.3	U	AT2G42210.2	Mitochondrial_import_inner_membrane_translocase_subunit_Tim17/Tim22/Tim23_family_protein
REFERENCE	evm.model.scaffold1053_size21173.3	NADH dehydrogenase [ubiquinone] 1 beta subcomplex subunit 10-B	EC:7.1.1.2;EC:1.6.99.5;EC:1.6.99.3	C	AT3G18410.2	NADH_dehydrogenase_ubiquinone_1_beta_subcomplex_subunit_10-B-like_protein_(Complex_I_subunit_NDUFS6)
REFERENCE	evm.model.scaffold649_size118696.3	54S ribosomal protein L51, mitochondrial	EC:7.1.1.2;EC:1.6.99.5;EC:1.6.99.3	J	AT3G59650.1	mitochondrial_ribosomal_protein_L51/S25/CI-B8_family_protein
REFERENCE	evm.model.scaffold641_size121784.18	probable NADH dehydrogenase [ubiquinone] 1 alpha subcomplex subunit 5, mitochondrial	EC:7.1.1.2;EC:1.6.99.5;EC:1.6.99.3	C	AT5G52840.1	NADH-ubiquinone_oxidoreductase-like_protein
REFERENCE	evm.model.scaffold542_size172077.24	NADH-ubiquinone oxidoreductase	EC:7.1.1.2;EC:1.6.99.5;EC:1.6.99.3	S	AT4G16450.2	NADH-ubiquinone_oxidoreductase
REFERENCE	evm.model.scaffold530_size179357.28	NADH:ubiquinone reductase (H(+)-translocating)	EC:7.1.1.2;EC:1.6.99.5;EC:1.6.99.3	none	AT4G20150.1	excitatory_amino_acid_transporter
REFERENCE	evm.model.scaffold488_size202194.4	Excitatory amino acid transporter	EC:7.1.1.2;EC:1.6.99.5;EC:1.6.99.3	none	AT4G20150.1	excitatory_amino_acid_transporter
REFERENCE	evm.model.scaffold451_size225693.30	gamma carbonic anhydrase 1, mitochondrial	EC:7.1.1.2;EC:1.6.99.5;EC:1.6.99.3	S	AT1G19580.1	gamma_carbonic_anhydrase_1
REFERENCE	evm.model.scaffold451_size225693.28	gamma carbonic anhydrase 1, mitochondrial-like	EC:7.1.1.2;EC:1.6.99.5;EC:1.6.99.3	S	AT1G19580.2	gamma_carbonic_anhydrase_1
REFERENCE	evm.model.scaffold448_size226196.15	NADH dehydrogenase [ubiquinone] 1 beta subcomplex subunit 7	EC:7.1.1.2;EC:1.6.99.5;EC:1.6.99.3	C	AT2G02050.1	NADH-ubiquinone_oxidoreductase_B18_subunit
REFERENCE	evm.model.scaffold418_size248570.25	54S ribosomal protein L51, mitochondrial-like	EC:7.1.1.2;EC:1.6.99.5;EC:1.6.99.3	J	AT3G59650.1	mitochondrial_ribosomal_protein_L51/S25/CI-B8_family_protein
REFERENCE	evm.model.scaffold403_size258745.73	NADH dehydrogenase [ubiquinone] flavoprotein 2, mitochondrial-like	EC:7.1.1.2;EC:1.6.99.5;EC:1.6.99.3	C	AT4G02580.1	NADH-ubiquinone_oxidoreductase_24_kDa_subunit
REFERENCE	evm.model.scaffold392_size272084.43	NADH-ubiquinone oxidoreductase	EC:7.1.1.2;EC:1.6.99.5;EC:1.6.99.3	S	AT4G16450.2	NADH-ubiquinone_oxidoreductase
REFERENCE	evm.model.scaffold336_size320595.78	NADH dehydrogenase subunit 2	EC:7.1.1.2;EC:1.6.99.5;EC:1.6.99.3	C	AT2G07689.1	NADH-Ubiquinone/plastoquinone_(complex_I)_protein
REFERENCE	evm.model.scaffold336_size320595.76	NADH dehydrogenase subunit 2	EC:7.1.1.2;EC:1.6.99.5;EC:1.6.99.3	C	AT2G07689.1	NADH-Ubiquinone/plastoquinone_(complex_I)_protein
REFERENCE	evm.model.scaffold336_size320595.74	NADH dehydrogenase subunit 2	EC:7.1.1.2;EC:1.6.99.5;EC:1.6.99.3	C	AT2G07689.1	NADH-Ubiquinone/plastoquinone_(complex_I)_protein
REFERENCE	evm.model.scaffold333_size321185.20	NADH dehydrogenase [ubiquinone] iron-sulfur protein like	EC:7.1.1.2;EC:1.6.99.5;EC:1.6.99.3	S	AT2G47690.1	NADH-ubiquinone_oxidoreductase-like_protein
REFERENCE	evm.model.scaffold333_size321185.18	NADH dehydrogenase [ubiquinone] iron-sulfur protein like	EC:7.1.1.2;EC:1.6.99.5;EC:1.6.99.3	S	AT2G47690.1	NADH-ubiquinone_oxidoreductase-like_protein
REFERENCE	evm.model.scaffold254_size388685.97	K-homology type RNA binding protein	EC:7.1.1.2;EC:1.6.99.5;EC:1.6.99.3	A	AT2G25970.1	KH_domain-containing_protein
REFERENCE	evm.model.scaffold226_size429880.27	External alternative nad(P)h-ubiquinone oxidoreductase b2, mitochondrial	EC:7.1.1.2;EC:1.6.99.5;EC:1.6.99.3	C	AT4G05020.1	NAD(P)H_dehydrogenase_B2
REFERENCE	evm.model.scaffold198_size466070.101	Gamma carbonic anhydrase-like 2, mitochondrial	EC:7.1.1.2;EC:1.6.99.5;EC:1.6.99.3	S	AT5G63510.1	gamma_carbonic_anhydrase_like_1
REFERENCE	evm.model.scaffold182_size489013.57	NADH dehydrogenase [ubiquinone] flavoprotein 2, mitochondrial	EC:7.1.1.2;EC:1.6.99.5;EC:1.6.99.3	C	AT4G02580.1	NADH-ubiquinone_oxidoreductase_24_kDa_subunit
REFERENCE	evm.model.scaffold182_size489013.56	NADH dehydrogenase [ubiquinone] flavoprotein 2, mitochondrial	EC:7.1.1.2;EC:1.6.99.5;EC:1.6.99.3	C	AT4G02580.1	NADH-ubiquinone_oxidoreductase_24_kDa_subunit
REFERENCE	evm.model.scaffold174_size508446.86	54S ribosomal protein L51, mitochondrial	EC:7.1.1.2;EC:1.6.99.5;EC:1.6.99.3	J	AT3G59650.2	mitochondrial_ribosomal_protein_L51/S25/CI-B8_family_protein
REFERENCE	evm.model.scaffold167_size520804.11	NADH dehydrogenase [ubiquinone] flavoprotein 2, mitochondrial-like	EC:7.1.1.2;EC:1.6.99.5;EC:1.6.99.3	C	AT4G02580.1	NADH-ubiquinone_oxidoreductase_24_kDa_subunit
REFERENCE	evm.model.scaffold143_size572353.118	Gamma carbonic anhydrase-like 2, mitochondrial	EC:7.1.1.2;EC:1.6.99.5;EC:1.6.99.3	S	AT5G63510.1	gamma_carbonic_anhydrase_like_1
REFERENCE	evm.model.scaffold143_size572353.116	Gamma carbonic anhydrase-like 2, mitochondrial	EC:7.1.1.2;EC:1.6.99.5;EC:1.6.99.3	S	AT5G63510.1	gamma_carbonic_anhydrase_like_1
REFERENCE	evm.model.scaffold121_size616638.116	NADH dehydrogenase [ubiquinone] 1 beta subcomplex subunit 7	EC:7.1.1.2;EC:1.6.99.5;EC:1.6.99.3	C	AT2G02050.1	NADH-ubiquinone_oxidoreductase_B18_subunit
REFERENCE	evm.model.scaffold102_size677817.29	NADH dehydrogenase [ubiquinone] 1 alpha subcomplex subunit 13-B	EC:7.1.1.2;EC:1.6.99.5;EC:1.6.99.3	CD	AT1G04630.1	GRIM-19_protein
REFERENCE	evm.model.scaffold87_size752611.108	NADH dehydrogenase [ubiquinone] 1 beta subcomplex subunit 10-B	EC:7.1.1.2;EC:1.6.99.5;EC:1.6.99.3	C	AT3G18410.2	NADH_dehydrogenase_ubiquinone_1_beta_subcomplex_subunit_10-B-like_protein_(Complex_I_subunit_NDUFS6)
REFERENCE	evm.model.scaffold65_size853472.128	gamma carbonic anhydrase 1, mitochondrial	EC:7.1.1.2;EC:1.6.99.5;EC:1.6.99.3	S	AT1G47260.1	gamma_carbonic_anhydrase_2
REFERENCE	evm.model.scaffold65_size853472.36	NADH dehydrogenase [ubiquinone] flavoprotein 1, mitochondrial	EC:7.1.1.2;EC:1.6.99.5;EC:1.6.99.3	C	AT5G08530.1	51_kDa_subunit_of_complex_I
REFERENCE	evm.model.scaffold42_size1040323.71	NADH dehydrogenase [ubiquinone] flavoprotein 1, mitochondrial	EC:7.1.1.2;EC:1.6.99.5;EC:1.6.99.3	C	AT5G08530.1	51_kDa_subunit_of_complex_I
REFERENCE	evm.model.scaffold37_size1057303.59	ATP synthase subunit beta, chloroplastic	EC:7.1.1.2;EC:1.6.99.5;EC:1.6.99.3	C	ATCG00480.1	ATP_synthase_subunit_beta
[OVER]	EC:6.1.1.20	0.0434663924330754	1.2840884027496427E-4	3	0	1398	26350
TEST	evm.model.scaffold805_size60286.2	phenylalanine--tRNA ligase, chloroplastic/mitochondrial-like	EC:6.1.1.20	J	AT3G58140.1	phenylalanyl-tRNA_synthetase_class_IIc_family_protein
TEST	evm.model.scaffold198_size466070.97	phenylalanine--tRNA ligase alpha subunit, cytoplasmic-like	EC:6.1.1.20	J	AT4G39280.1	phenylalanyl-tRNA_synthetase%2C_putative_/_phenylalanine-tRNA_ligase
TEST	evm.model.scaffold1_size1862935.370	Putative phenylalanine--tRNA ligase beta subunit	EC:6.1.1.20	J	AT1G72550.1	tRNA_synthetase_beta_subunit_family_protein
[OVER]	EC:1.6.99.5	5.01133950678081E-6	7.4022740129701775E-9	15	33	1386	26317
TEST	evm.model.scaffold1015_size24410.1	NADH-ubiquinone oxidoreductase chain 1	EC:7.1.1.2;EC:1.6.99.5;EC:1.6.99.3	C	ATMG01275.1	NADH_dehydrogenase_1A
TEST	evm.model.scaffold515_size186375.31	NADH dehydrogenase [ubiquinone] 1 alpha subcomplex subunit 6-like	EC:5.2.1.8;EC:7.1.1.2;EC:1.6.99.5;EC:1.6.99.3	C	AT3G12260.1	LYR_family_of_Fe/S_cluster_biogenesis_protein
TEST	evm.model.scaffold447_size226588.41	NADH:ubiquinone reductase (H(+)-translocating)	EC:7.1.1.2;EC:1.6.99.5;EC:1.6.99.3	none	AT3G57785.1	ESSS_subunit_of_NADH:ubiquinone_oxidoreductase_(complex_I)_protein
TEST	evm.model.scaffold240_size406237.33	NADH dehydrogenase subunit B (Fragment)	EC:7.1.1.2;EC:1.6.99.5;EC:1.6.99.3	C	ATCG01250.1	NADH-quinone_oxidoreductase_protein
TEST	evm.model.scaffold182_size489013.80	NADH dehydrogenase [ubiquinone] 1 alpha subcomplex subunit 9, mitochondrial	EC:7.1.1.2;EC:1.6.99.5;EC:1.6.99.3	C	AT2G20360.1	NAD(P)-binding_Rossmann-fold_superfamily_protein
TEST	evm.model.scaffold168_size520293.44	Nadh dehydrogenase [ubiquinone] iron-sulfur protein 7, mitochondrial	EC:7.1.1.2;EC:1.6.99.5;EC:1.6.99.3	C	AT5G11770.1	NADH-ubiquinone_oxidoreductase_20_kDa_subunit
TEST	evm.model.scaffold147_size561064.35	NADH dehydrogenase [ubiquinone] 1 alpha subcomplex subunit 12	EC:7.1.1.2;EC:1.6.99.5;EC:1.6.99.3	C	AT3G03100.1	NADH:ubiquinone_oxidoreductase%2C_17.2kDa_subunit
TEST	evm.model.scaffold106_size656854.56	NADH dehydrogenase [ubiquinone] 1 alpha subcomplex subunit 8-B like	EC:7.1.1.2;EC:1.6.99.5;EC:1.6.99.3	C	AT5G18800.2	Cox19-like_CHCH_family_protein
TEST	evm.model.scaffold70_size835982.171	NADH dehydrogenase subunit 4	EC:7.1.1.2;EC:1.6.99.5;EC:1.6.99.3	C	noTAIR	NULL
TEST	evm.model.scaffold70_size835982.78	NADH dehydrogenase [ubiquinone] 1 alpha subcomplex subunit 12	EC:7.1.1.2;EC:1.6.99.5;EC:1.6.99.3	U	AT4G26965.1	NADH:ubiquinone_oxidoreductase%2C_17.2kDa_subunit
TEST	evm.model.scaffold58_size900371.86	NADH dehydrogenase [ubiquinone] iron-sulfur protein 4, mitochondrial	EC:7.1.1.2;EC:1.6.99.5;EC:1.6.99.3	C	AT5G67590.1	NADH-ubiquinone_oxidoreductase-like_protein
TEST	evm.model.scaffold33_size1110170.28	Nadh dehydrogenase [ubiquinone] 1 alpha subcomplex subunit 1	EC:7.1.1.2;EC:1.6.99.5;EC:1.6.99.3	S	AT3G08610.1	NADH_dehydrogenase_ubiquinone_1_alpha_subcomplex_subunit
TEST	evm.model.scaffold31_size1122664.156	NADH dehydrogenase [ubiquinone] iron-sulfur protein 1, mitochondrial	EC:7.1.1.2;EC:1.6.99.5;EC:1.6.99.3	C	AT5G37510.2	NADH-ubiquinone_dehydrogenase
TEST	evm.model.scaffold19_size1367837.54	NADH dehydrogenase [ubiquinone] 1 alpha subcomplex subunit 2-like	EC:7.1.1.2;EC:1.6.99.5;EC:1.6.99.3	C	AT5G47890.1	NADH-ubiquinone_oxidoreductase_B8_subunit
TEST	evm.model.scaffold18_size1404391.84	Outer envelope pore protein 16-3, chloroplastic/mitochondrial	EC:7.1.1.2;EC:1.6.99.5;EC:1.6.99.3	U	AT2G42210.2	Mitochondrial_import_inner_membrane_translocase_subunit_Tim17/Tim22/Tim23_family_protein
REFERENCE	evm.model.scaffold1053_size21173.3	NADH dehydrogenase [ubiquinone] 1 beta subcomplex subunit 10-B	EC:7.1.1.2;EC:1.6.99.5;EC:1.6.99.3	C	AT3G18410.2	NADH_dehydrogenase_ubiquinone_1_beta_subcomplex_subunit_10-B-like_protein_(Complex_I_subunit_NDUFS6)
REFERENCE	evm.model.scaffold649_size118696.3	54S ribosomal protein L51, mitochondrial	EC:7.1.1.2;EC:1.6.99.5;EC:1.6.99.3	J	AT3G59650.1	mitochondrial_ribosomal_protein_L51/S25/CI-B8_family_protein
REFERENCE	evm.model.scaffold641_size121784.18	probable NADH dehydrogenase [ubiquinone] 1 alpha subcomplex subunit 5, mitochondrial	EC:7.1.1.2;EC:1.6.99.5;EC:1.6.99.3	C	AT5G52840.1	NADH-ubiquinone_oxidoreductase-like_protein
REFERENCE	evm.model.scaffold542_size172077.24	NADH-ubiquinone oxidoreductase	EC:7.1.1.2;EC:1.6.99.5;EC:1.6.99.3	S	AT4G16450.2	NADH-ubiquinone_oxidoreductase
REFERENCE	evm.model.scaffold530_size179357.28	NADH:ubiquinone reductase (H(+)-translocating)	EC:7.1.1.2;EC:1.6.99.5;EC:1.6.99.3	none	AT4G20150.1	excitatory_amino_acid_transporter
REFERENCE	evm.model.scaffold488_size202194.4	Excitatory amino acid transporter	EC:7.1.1.2;EC:1.6.99.5;EC:1.6.99.3	none	AT4G20150.1	excitatory_amino_acid_transporter
REFERENCE	evm.model.scaffold451_size225693.30	gamma carbonic anhydrase 1, mitochondrial	EC:7.1.1.2;EC:1.6.99.5;EC:1.6.99.3	S	AT1G19580.1	gamma_carbonic_anhydrase_1
REFERENCE	evm.model.scaffold451_size225693.28	gamma carbonic anhydrase 1, mitochondrial-like	EC:7.1.1.2;EC:1.6.99.5;EC:1.6.99.3	S	AT1G19580.2	gamma_carbonic_anhydrase_1
REFERENCE	evm.model.scaffold448_size226196.15	NADH dehydrogenase [ubiquinone] 1 beta subcomplex subunit 7	EC:7.1.1.2;EC:1.6.99.5;EC:1.6.99.3	C	AT2G02050.1	NADH-ubiquinone_oxidoreductase_B18_subunit
REFERENCE	evm.model.scaffold418_size248570.25	54S ribosomal protein L51, mitochondrial-like	EC:7.1.1.2;EC:1.6.99.5;EC:1.6.99.3	J	AT3G59650.1	mitochondrial_ribosomal_protein_L51/S25/CI-B8_family_protein
REFERENCE	evm.model.scaffold403_size258745.73	NADH dehydrogenase [ubiquinone] flavoprotein 2, mitochondrial-like	EC:7.1.1.2;EC:1.6.99.5;EC:1.6.99.3	C	AT4G02580.1	NADH-ubiquinone_oxidoreductase_24_kDa_subunit
REFERENCE	evm.model.scaffold392_size272084.43	NADH-ubiquinone oxidoreductase	EC:7.1.1.2;EC:1.6.99.5;EC:1.6.99.3	S	AT4G16450.2	NADH-ubiquinone_oxidoreductase
REFERENCE	evm.model.scaffold336_size320595.78	NADH dehydrogenase subunit 2	EC:7.1.1.2;EC:1.6.99.5;EC:1.6.99.3	C	AT2G07689.1	NADH-Ubiquinone/plastoquinone_(complex_I)_protein
REFERENCE	evm.model.scaffold336_size320595.76	NADH dehydrogenase subunit 2	EC:7.1.1.2;EC:1.6.99.5;EC:1.6.99.3	C	AT2G07689.1	NADH-Ubiquinone/plastoquinone_(complex_I)_protein
REFERENCE	evm.model.scaffold336_size320595.74	NADH dehydrogenase subunit 2	EC:7.1.1.2;EC:1.6.99.5;EC:1.6.99.3	C	AT2G07689.1	NADH-Ubiquinone/plastoquinone_(complex_I)_protein
REFERENCE	evm.model.scaffold333_size321185.20	NADH dehydrogenase [ubiquinone] iron-sulfur protein like	EC:7.1.1.2;EC:1.6.99.5;EC:1.6.99.3	S	AT2G47690.1	NADH-ubiquinone_oxidoreductase-like_protein
REFERENCE	evm.model.scaffold333_size321185.18	NADH dehydrogenase [ubiquinone] iron-sulfur protein like	EC:7.1.1.2;EC:1.6.99.5;EC:1.6.99.3	S	AT2G47690.1	NADH-ubiquinone_oxidoreductase-like_protein
REFERENCE	evm.model.scaffold254_size388685.97	K-homology type RNA binding protein	EC:7.1.1.2;EC:1.6.99.5;EC:1.6.99.3	A	AT2G25970.1	KH_domain-containing_protein
REFERENCE	evm.model.scaffold226_size429880.27	External alternative nad(P)h-ubiquinone oxidoreductase b2, mitochondrial	EC:7.1.1.2;EC:1.6.99.5;EC:1.6.99.3	C	AT4G05020.1	NAD(P)H_dehydrogenase_B2
REFERENCE	evm.model.scaffold198_size466070.101	Gamma carbonic anhydrase-like 2, mitochondrial	EC:7.1.1.2;EC:1.6.99.5;EC:1.6.99.3	S	AT5G63510.1	gamma_carbonic_anhydrase_like_1
REFERENCE	evm.model.scaffold182_size489013.57	NADH dehydrogenase [ubiquinone] flavoprotein 2, mitochondrial	EC:7.1.1.2;EC:1.6.99.5;EC:1.6.99.3	C	AT4G02580.1	NADH-ubiquinone_oxidoreductase_24_kDa_subunit
REFERENCE	evm.model.scaffold182_size489013.56	NADH dehydrogenase [ubiquinone] flavoprotein 2, mitochondrial	EC:7.1.1.2;EC:1.6.99.5;EC:1.6.99.3	C	AT4G02580.1	NADH-ubiquinone_oxidoreductase_24_kDa_subunit
REFERENCE	evm.model.scaffold174_size508446.86	54S ribosomal protein L51, mitochondrial	EC:7.1.1.2;EC:1.6.99.5;EC:1.6.99.3	J	AT3G59650.2	mitochondrial_ribosomal_protein_L51/S25/CI-B8_family_protein
REFERENCE	evm.model.scaffold167_size520804.11	NADH dehydrogenase [ubiquinone] flavoprotein 2, mitochondrial-like	EC:7.1.1.2;EC:1.6.99.5;EC:1.6.99.3	C	AT4G02580.1	NADH-ubiquinone_oxidoreductase_24_kDa_subunit
REFERENCE	evm.model.scaffold143_size572353.118	Gamma carbonic anhydrase-like 2, mitochondrial	EC:7.1.1.2;EC:1.6.99.5;EC:1.6.99.3	S	AT5G63510.1	gamma_carbonic_anhydrase_like_1
REFERENCE	evm.model.scaffold143_size572353.116	Gamma carbonic anhydrase-like 2, mitochondrial	EC:7.1.1.2;EC:1.6.99.5;EC:1.6.99.3	S	AT5G63510.1	gamma_carbonic_anhydrase_like_1
REFERENCE	evm.model.scaffold121_size616638.116	NADH dehydrogenase [ubiquinone] 1 beta subcomplex subunit 7	EC:7.1.1.2;EC:1.6.99.5;EC:1.6.99.3	C	AT2G02050.1	NADH-ubiquinone_oxidoreductase_B18_subunit
REFERENCE	evm.model.scaffold102_size677817.29	NADH dehydrogenase [ubiquinone] 1 alpha subcomplex subunit 13-B	EC:7.1.1.2;EC:1.6.99.5;EC:1.6.99.3	CD	AT1G04630.1	GRIM-19_protein
REFERENCE	evm.model.scaffold87_size752611.108	NADH dehydrogenase [ubiquinone] 1 beta subcomplex subunit 10-B	EC:7.1.1.2;EC:1.6.99.5;EC:1.6.99.3	C	AT3G18410.2	NADH_dehydrogenase_ubiquinone_1_beta_subcomplex_subunit_10-B-like_protein_(Complex_I_subunit_NDUFS6)
REFERENCE	evm.model.scaffold65_size853472.128	gamma carbonic anhydrase 1, mitochondrial	EC:7.1.1.2;EC:1.6.99.5;EC:1.6.99.3	S	AT1G47260.1	gamma_carbonic_anhydrase_2
REFERENCE	evm.model.scaffold65_size853472.36	NADH dehydrogenase [ubiquinone] flavoprotein 1, mitochondrial	EC:7.1.1.2;EC:1.6.99.5;EC:1.6.99.3	C	AT5G08530.1	51_kDa_subunit_of_complex_I
REFERENCE	evm.model.scaffold42_size1040323.71	NADH dehydrogenase [ubiquinone] flavoprotein 1, mitochondrial	EC:7.1.1.2;EC:1.6.99.5;EC:1.6.99.3	C	AT5G08530.1	51_kDa_subunit_of_complex_I
REFERENCE	evm.model.scaffold37_size1057303.59	ATP synthase subunit beta, chloroplastic	EC:7.1.1.2;EC:1.6.99.5;EC:1.6.99.3	C	ATCG00480.1	ATP_synthase_subunit_beta
[OVER]	EC:1.6.99.3	7.214262059617151E-5	1.598433248068793E-7	16	51	1385	26299
TEST	evm.model.scaffold1015_size24410.1	NADH-ubiquinone oxidoreductase chain 1	EC:7.1.1.2;EC:1.6.99.5;EC:1.6.99.3	C	ATMG01275.1	NADH_dehydrogenase_1A
TEST	evm.model.scaffold525_size182403.7	alternative NAD(P)H-ubiquinone oxidoreductase C1, chloroplastic/mitochondrial isoform X1	EC:1.6.99.3;EC:1.6.5.2	C	AT5G08740.1	NAD(P)H_dehydrogenase_C1
TEST	evm.model.scaffold515_size186375.31	NADH dehydrogenase [ubiquinone] 1 alpha subcomplex subunit 6-like	EC:5.2.1.8;EC:7.1.1.2;EC:1.6.99.5;EC:1.6.99.3	C	AT3G12260.1	LYR_family_of_Fe/S_cluster_biogenesis_protein
TEST	evm.model.scaffold447_size226588.41	NADH:ubiquinone reductase (H(+)-translocating)	EC:7.1.1.2;EC:1.6.99.5;EC:1.6.99.3	none	AT3G57785.1	ESSS_subunit_of_NADH:ubiquinone_oxidoreductase_(complex_I)_protein
TEST	evm.model.scaffold240_size406237.33	NADH dehydrogenase subunit B (Fragment)	EC:7.1.1.2;EC:1.6.99.5;EC:1.6.99.3	C	ATCG01250.1	NADH-quinone_oxidoreductase_protein
TEST	evm.model.scaffold182_size489013.80	NADH dehydrogenase [ubiquinone] 1 alpha subcomplex subunit 9, mitochondrial	EC:7.1.1.2;EC:1.6.99.5;EC:1.6.99.3	C	AT2G20360.1	NAD(P)-binding_Rossmann-fold_superfamily_protein
TEST	evm.model.scaffold168_size520293.44	Nadh dehydrogenase [ubiquinone] iron-sulfur protein 7, mitochondrial	EC:7.1.1.2;EC:1.6.99.5;EC:1.6.99.3	C	AT5G11770.1	NADH-ubiquinone_oxidoreductase_20_kDa_subunit
TEST	evm.model.scaffold147_size561064.35	NADH dehydrogenase [ubiquinone] 1 alpha subcomplex subunit 12	EC:7.1.1.2;EC:1.6.99.5;EC:1.6.99.3	C	AT3G03100.1	NADH:ubiquinone_oxidoreductase%2C_17.2kDa_subunit
TEST	evm.model.scaffold106_size656854.56	NADH dehydrogenase [ubiquinone] 1 alpha subcomplex subunit 8-B like	EC:7.1.1.2;EC:1.6.99.5;EC:1.6.99.3	C	AT5G18800.2	Cox19-like_CHCH_family_protein
TEST	evm.model.scaffold70_size835982.171	NADH dehydrogenase subunit 4	EC:7.1.1.2;EC:1.6.99.5;EC:1.6.99.3	C	noTAIR	NULL
TEST	evm.model.scaffold70_size835982.78	NADH dehydrogenase [ubiquinone] 1 alpha subcomplex subunit 12	EC:7.1.1.2;EC:1.6.99.5;EC:1.6.99.3	U	AT4G26965.1	NADH:ubiquinone_oxidoreductase%2C_17.2kDa_subunit
TEST	evm.model.scaffold58_size900371.86	NADH dehydrogenase [ubiquinone] iron-sulfur protein 4, mitochondrial	EC:7.1.1.2;EC:1.6.99.5;EC:1.6.99.3	C	AT5G67590.1	NADH-ubiquinone_oxidoreductase-like_protein
TEST	evm.model.scaffold33_size1110170.28	Nadh dehydrogenase [ubiquinone] 1 alpha subcomplex subunit 1	EC:7.1.1.2;EC:1.6.99.5;EC:1.6.99.3	S	AT3G08610.1	NADH_dehydrogenase_ubiquinone_1_alpha_subcomplex_subunit
TEST	evm.model.scaffold31_size1122664.156	NADH dehydrogenase [ubiquinone] iron-sulfur protein 1, mitochondrial	EC:7.1.1.2;EC:1.6.99.5;EC:1.6.99.3	C	AT5G37510.2	NADH-ubiquinone_dehydrogenase
TEST	evm.model.scaffold19_size1367837.54	NADH dehydrogenase [ubiquinone] 1 alpha subcomplex subunit 2-like	EC:7.1.1.2;EC:1.6.99.5;EC:1.6.99.3	C	AT5G47890.1	NADH-ubiquinone_oxidoreductase_B8_subunit
TEST	evm.model.scaffold18_size1404391.84	Outer envelope pore protein 16-3, chloroplastic/mitochondrial	EC:7.1.1.2;EC:1.6.99.5;EC:1.6.99.3	U	AT2G42210.2	Mitochondrial_import_inner_membrane_translocase_subunit_Tim17/Tim22/Tim23_family_protein
REFERENCE	evm.model.scaffold1544_size5385.1	OSJNBb0118P14.7 protein	EC:1.6.99.3	GM	AT1G32220.1	NAD(P)-binding_Rossmann-fold_superfamily_protein
REFERENCE	evm.model.scaffold1116_size16635.4	internal alternative NAD(P)H-ubiquinone oxidoreductase A1, mitochondrial	EC:1.6.99.3;EC:1.6.99.1	C	AT1G07180.1	alternative_NAD(P)H_dehydrogenase_1
REFERENCE	evm.model.scaffold1053_size21173.3	NADH dehydrogenase [ubiquinone] 1 beta subcomplex subunit 10-B	EC:7.1.1.2;EC:1.6.99.5;EC:1.6.99.3	C	AT3G18410.2	NADH_dehydrogenase_ubiquinone_1_beta_subcomplex_subunit_10-B-like_protein_(Complex_I_subunit_NDUFS6)
REFERENCE	evm.model.scaffold649_size118696.3	54S ribosomal protein L51, mitochondrial	EC:7.1.1.2;EC:1.6.99.5;EC:1.6.99.3	J	AT3G59650.1	mitochondrial_ribosomal_protein_L51/S25/CI-B8_family_protein
REFERENCE	evm.model.scaffold647_size119004.2	internal alternative NAD(P)H-ubiquinone oxidoreductase A1, mitochondrial	EC:1.6.99.3;EC:1.6.99.1	C	AT1G07180.1	alternative_NAD(P)H_dehydrogenase_1
REFERENCE	evm.model.scaffold641_size121784.18	probable NADH dehydrogenase [ubiquinone] 1 alpha subcomplex subunit 5, mitochondrial	EC:7.1.1.2;EC:1.6.99.5;EC:1.6.99.3	C	AT5G52840.1	NADH-ubiquinone_oxidoreductase-like_protein
REFERENCE	evm.model.scaffold542_size172077.24	NADH-ubiquinone oxidoreductase	EC:7.1.1.2;EC:1.6.99.5;EC:1.6.99.3	S	AT4G16450.2	NADH-ubiquinone_oxidoreductase
REFERENCE	evm.model.scaffold530_size179357.28	NADH:ubiquinone reductase (H(+)-translocating)	EC:7.1.1.2;EC:1.6.99.5;EC:1.6.99.3	none	AT4G20150.1	excitatory_amino_acid_transporter
REFERENCE	evm.model.scaffold530_size179357.1	Putative oxidoreductase	EC:1.6.99.3	GM	AT1G32220.1	NAD(P)-binding_Rossmann-fold_superfamily_protein
REFERENCE	evm.model.scaffold488_size202194.4	Excitatory amino acid transporter	EC:7.1.1.2;EC:1.6.99.5;EC:1.6.99.3	none	AT4G20150.1	excitatory_amino_acid_transporter
REFERENCE	evm.model.scaffold451_size225693.30	gamma carbonic anhydrase 1, mitochondrial	EC:7.1.1.2;EC:1.6.99.5;EC:1.6.99.3	S	AT1G19580.1	gamma_carbonic_anhydrase_1
REFERENCE	evm.model.scaffold451_size225693.28	gamma carbonic anhydrase 1, mitochondrial-like	EC:7.1.1.2;EC:1.6.99.5;EC:1.6.99.3	S	AT1G19580.2	gamma_carbonic_anhydrase_1
REFERENCE	evm.model.scaffold448_size226196.15	NADH dehydrogenase [ubiquinone] 1 beta subcomplex subunit 7	EC:7.1.1.2;EC:1.6.99.5;EC:1.6.99.3	C	AT2G02050.1	NADH-ubiquinone_oxidoreductase_B18_subunit
REFERENCE	evm.model.scaffold444_size228446.5	External alternative NAD(P)H-ubiquinone oxidoreductase	EC:1.6.99.3	C	AT2G20800.1	NAD(P)H_dehydrogenase_B4
REFERENCE	evm.model.scaffold418_size248570.25	54S ribosomal protein L51, mitochondrial-like	EC:7.1.1.2;EC:1.6.99.5;EC:1.6.99.3	J	AT3G59650.1	mitochondrial_ribosomal_protein_L51/S25/CI-B8_family_protein
REFERENCE	evm.model.scaffold403_size258745.73	NADH dehydrogenase [ubiquinone] flavoprotein 2, mitochondrial-like	EC:7.1.1.2;EC:1.6.99.5;EC:1.6.99.3	C	AT4G02580.1	NADH-ubiquinone_oxidoreductase_24_kDa_subunit
REFERENCE	evm.model.scaffold392_size272084.43	NADH-ubiquinone oxidoreductase	EC:7.1.1.2;EC:1.6.99.5;EC:1.6.99.3	S	AT4G16450.2	NADH-ubiquinone_oxidoreductase
REFERENCE	evm.model.scaffold363_size289583.51	internal alternative NAD(P)H-ubiquinone oxidoreductase A1, mitochondrial	EC:1.6.99.3;EC:1.6.99.1	C	AT2G29990.1	alternative_NAD(P)H_dehydrogenase_2
REFERENCE	evm.model.scaffold352_size303969.43	NAD(P)-binding domain containing protein	EC:5.2.1.8;EC:1.6.99.3	GM	AT5G10730.1	NAD(P)-binding_Rossmann-fold_superfamily_protein
REFERENCE	evm.model.scaffold336_size320595.78	NADH dehydrogenase subunit 2	EC:7.1.1.2;EC:1.6.99.5;EC:1.6.99.3	C	AT2G07689.1	NADH-Ubiquinone/plastoquinone_(complex_I)_protein
REFERENCE	evm.model.scaffold336_size320595.76	NADH dehydrogenase subunit 2	EC:7.1.1.2;EC:1.6.99.5;EC:1.6.99.3	C	AT2G07689.1	NADH-Ubiquinone/plastoquinone_(complex_I)_protein
REFERENCE	evm.model.scaffold336_size320595.74	NADH dehydrogenase subunit 2	EC:7.1.1.2;EC:1.6.99.5;EC:1.6.99.3	C	AT2G07689.1	NADH-Ubiquinone/plastoquinone_(complex_I)_protein
REFERENCE	evm.model.scaffold333_size321185.20	NADH dehydrogenase [ubiquinone] iron-sulfur protein like	EC:7.1.1.2;EC:1.6.99.5;EC:1.6.99.3	S	AT2G47690.1	NADH-ubiquinone_oxidoreductase-like_protein
REFERENCE	evm.model.scaffold333_size321185.18	NADH dehydrogenase [ubiquinone] iron-sulfur protein like	EC:7.1.1.2;EC:1.6.99.5;EC:1.6.99.3	S	AT2G47690.1	NADH-ubiquinone_oxidoreductase-like_protein
REFERENCE	evm.model.scaffold308_size341706.13	internal alternative NAD(P)H-ubiquinone oxidoreductase A1, mitochondrial	EC:1.6.99.3;EC:1.6.99.1	C	AT1G07180.1	alternative_NAD(P)H_dehydrogenase_1
REFERENCE	evm.model.scaffold254_size388685.97	K-homology type RNA binding protein	EC:7.1.1.2;EC:1.6.99.5;EC:1.6.99.3	A	AT2G25970.1	KH_domain-containing_protein
REFERENCE	evm.model.scaffold251_size391187.23	Putative oxidoreductase	EC:1.6.99.3	GM	AT1G32220.1	NAD(P)-binding_Rossmann-fold_superfamily_protein
REFERENCE	evm.model.scaffold226_size429880.27	External alternative nad(P)h-ubiquinone oxidoreductase b2, mitochondrial	EC:7.1.1.2;EC:1.6.99.5;EC:1.6.99.3	C	AT4G05020.1	NAD(P)H_dehydrogenase_B2
REFERENCE	evm.model.scaffold198_size466070.101	Gamma carbonic anhydrase-like 2, mitochondrial	EC:7.1.1.2;EC:1.6.99.5;EC:1.6.99.3	S	AT5G63510.1	gamma_carbonic_anhydrase_like_1
REFERENCE	evm.model.scaffold182_size489013.57	NADH dehydrogenase [ubiquinone] flavoprotein 2, mitochondrial	EC:7.1.1.2;EC:1.6.99.5;EC:1.6.99.3	C	AT4G02580.1	NADH-ubiquinone_oxidoreductase_24_kDa_subunit
REFERENCE	evm.model.scaffold182_size489013.56	NADH dehydrogenase [ubiquinone] flavoprotein 2, mitochondrial	EC:7.1.1.2;EC:1.6.99.5;EC:1.6.99.3	C	AT4G02580.1	NADH-ubiquinone_oxidoreductase_24_kDa_subunit
REFERENCE	evm.model.scaffold174_size508446.86	54S ribosomal protein L51, mitochondrial	EC:7.1.1.2;EC:1.6.99.5;EC:1.6.99.3	J	AT3G59650.2	mitochondrial_ribosomal_protein_L51/S25/CI-B8_family_protein
REFERENCE	evm.model.scaffold167_size520804.11	NADH dehydrogenase [ubiquinone] flavoprotein 2, mitochondrial-like	EC:7.1.1.2;EC:1.6.99.5;EC:1.6.99.3	C	AT4G02580.1	NADH-ubiquinone_oxidoreductase_24_kDa_subunit
REFERENCE	evm.model.scaffold143_size572353.118	Gamma carbonic anhydrase-like 2, mitochondrial	EC:7.1.1.2;EC:1.6.99.5;EC:1.6.99.3	S	AT5G63510.1	gamma_carbonic_anhydrase_like_1
REFERENCE	evm.model.scaffold143_size572353.116	Gamma carbonic anhydrase-like 2, mitochondrial	EC:7.1.1.2;EC:1.6.99.5;EC:1.6.99.3	S	AT5G63510.1	gamma_carbonic_anhydrase_like_1
REFERENCE	evm.model.scaffold134_size590630.12	Cytosolic Fe-S cluster assembly factor NARFL	EC:1.6.99.3	Y	AT4G16440.1	ferredoxin_hydrogenase
REFERENCE	evm.model.scaffold134_size590630.4	protein NAR1	EC:1.6.99.3	Y	AT4G16440.1	ferredoxin_hydrogenase
REFERENCE	evm.model.scaffold121_size616638.116	NADH dehydrogenase [ubiquinone] 1 beta subcomplex subunit 7	EC:7.1.1.2;EC:1.6.99.5;EC:1.6.99.3	C	AT2G02050.1	NADH-ubiquinone_oxidoreductase_B18_subunit
REFERENCE	evm.model.scaffold102_size677817.29	NADH dehydrogenase [ubiquinone] 1 alpha subcomplex subunit 13-B	EC:7.1.1.2;EC:1.6.99.5;EC:1.6.99.3	CD	AT1G04630.1	GRIM-19_protein
REFERENCE	evm.model.scaffold93_size714796.169	internal alternative NAD(P)H-ubiquinone oxidoreductase A1, mitochondrial	EC:1.6.99.3;EC:1.6.99.1	C	AT1G07180.1	alternative_NAD(P)H_dehydrogenase_1
REFERENCE	evm.model.scaffold87_size752611.108	NADH dehydrogenase [ubiquinone] 1 beta subcomplex subunit 10-B	EC:7.1.1.2;EC:1.6.99.5;EC:1.6.99.3	C	AT3G18410.2	NADH_dehydrogenase_ubiquinone_1_beta_subcomplex_subunit_10-B-like_protein_(Complex_I_subunit_NDUFS6)
REFERENCE	evm.model.scaffold65_size853472.128	gamma carbonic anhydrase 1, mitochondrial	EC:7.1.1.2;EC:1.6.99.5;EC:1.6.99.3	S	AT1G47260.1	gamma_carbonic_anhydrase_2
REFERENCE	evm.model.scaffold65_size853472.36	NADH dehydrogenase [ubiquinone] flavoprotein 1, mitochondrial	EC:7.1.1.2;EC:1.6.99.5;EC:1.6.99.3	C	AT5G08530.1	51_kDa_subunit_of_complex_I
REFERENCE	evm.model.scaffold59_size887255.174	dihydropyrimidine dehydrogenase (NADP(+)), chloroplastic	EC:3.5.2.2;EC:1.6.99.3;EC:1.3.1.2	F	AT3G17810.1	pyrimidine_1
REFERENCE	evm.model.scaffold42_size1040323.71	NADH dehydrogenase [ubiquinone] flavoprotein 1, mitochondrial	EC:7.1.1.2;EC:1.6.99.5;EC:1.6.99.3	C	AT5G08530.1	51_kDa_subunit_of_complex_I
REFERENCE	evm.model.scaffold37_size1057303.59	ATP synthase subunit beta, chloroplastic	EC:7.1.1.2;EC:1.6.99.5;EC:1.6.99.3	C	ATCG00480.1	ATP_synthase_subunit_beta
REFERENCE	evm.model.scaffold34_size1082081.58	External alternative NAD(P)H-ubiquinone oxidoreductase	EC:1.6.99.3	C	AT2G20800.1	NAD(P)H_dehydrogenase_B4
REFERENCE	evm.model.scaffold18_size1404391.123	NADH dehydrogenase [ubiquinone] iron-sulfur protein 8, mitochondrial	EC:1.6.99.3	C	AT1G79010.1	Alpha-helical_ferredoxin
REFERENCE	evm.model.scaffold16_size1429268.88	Protein nar1	EC:1.6.99.3	Y	AT4G16440.1	ferredoxin_hydrogenase
REFERENCE	evm.model.scaffold13_size1475766.223	External alternative NAD(P)H-ubiquinone oxidoreductase	EC:1.6.99.3	C	AT2G20800.1	NAD(P)H_dehydrogenase_B4
REFERENCE	evm.model.scaffold5_size1651677.432	NADH dehydrogenase [ubiquinone] iron-sulfur protein 8, mitochondrial	EC:1.6.99.3	C	AT1G16700.1	Alpha-helical_ferredoxin

## Sheet: Ugibba SINGLETONS
Tags	Annotation	FDR	P-Value	Nr Test	Nr Reference	Non Annot Test	Non Annot Reference
[OVER]	EC:7.1.1.2	0.005990988883724327	1.3472988494132669E-5	13	13	2475	15259
TEST	evm.model.Ug_unitig_899.1090	NADH dehydrogenase [ubiquinone] 1 alpha subcomplex subunit 6	EC:5.2.1.8;EC:7.1.1.2;EC:1.6.99.5;EC:1.6.99.3	C	AT3G12260.1	LYR_family_of_Fe/S_cluster_biogenesis_protein
TEST	evm.model.Ug_unitig_748.1416	NADH dehydrogenase [ubiquinone] iron-sulfur protein 1, mitochondrial	EC:7.1.1.2;EC:1.6.99.5;EC:1.6.99.3	C	AT5G37510.1	NADH-ubiquinone_dehydrogenase
TEST	evm.model.Ug_unitig_748.1374	NADH dehydrogenase [ubiquinone] iron-sulfur protein 4, mitochondrial	EC:7.1.1.2;EC:1.6.99.5;EC:1.6.99.3	C	AT5G67590.1	NADH-ubiquinone_oxidoreductase-like_protein
TEST	evm.model.Ug_unitig_748.462	NADH:ubiquinone reductase (H(+)-translocating)	EC:7.1.1.2;EC:1.6.99.5;EC:1.6.99.3	none	AT4G20150.1	excitatory_amino_acid_transporter
TEST	evm.model.Ug_unitig_747.506	NADH-ubiquinone oxidoreductase 20.9 kDa subunit-like	EC:7.1.1.2;EC:1.6.99.5;EC:1.6.99.3	S	AT4G16450.2	NADH-ubiquinone_oxidoreductase
TEST	evm.model.Ug_unitig_699.571	NADH dehydrogenase [ubiquinone] 1 beta subcomplex subunit 7	EC:7.1.1.2;EC:1.6.99.5;EC:1.6.99.3	C	AT2G02050.1	NADH-ubiquinone_oxidoreductase_B18_subunit
TEST	evm.model.Ug_unitig_26.1290	NADH dehydrogenase [ubiquinone] flavoprotein 2, mitochondrial	EC:7.1.1.2;EC:1.6.99.5;EC:1.6.99.3	C	AT4G02580.1	NADH-ubiquinone_oxidoreductase_24_kDa_subunit
TEST	evm.model.Ug_unitig_26.731	NADH dehydrogenase-like complex L	EC:7.1.1.2;EC:1.6.99.5;EC:1.6.99.3	S	AT1G70760.1	inorganic_carbon_transport_protein-like_protein
TEST	evm.model.Ug_unitig_26.322	NADH:ubiquinone reductase (H(+)-translocating)	EC:7.1.1.2;EC:1.6.99.5;EC:1.6.99.3	none	AT2G31490.1	neuronal_acetylcholine_receptor_subunit_alpha-5
TEST	evm.model.Ug_unitig_22.1026	NADH dehydrogenase [ubiquinone] 1 alpha subcomplex subunit 9 like	EC:7.1.1.2;EC:1.6.99.5;EC:1.6.99.3	C	AT2G20360.1	NAD(P)-binding_Rossmann-fold_superfamily_protein
TEST	evm.model.Ug_unitig_8.1644	NADH dehydrogenase [ubiquinone] 1 alpha subcomplex subunit 12	EC:7.1.1.2;EC:1.6.99.5;EC:1.6.99.3	U	AT4G26965.1	NADH:ubiquinone_oxidoreductase%2C_17.2kDa_subunit
TEST	evm.model.Ug_unitig_0.2139	NADH dehydrogenase [ubiquinone] 1 alpha subcomplex subunit 12	EC:7.1.1.2;EC:1.6.99.5;EC:1.6.99.3	C	AT3G03100.1	NADH:ubiquinone_oxidoreductase%2C_17.2kDa_subunit
TEST	evm.model.Ug_unitig_0.1071	probable NADH dehydrogenase [ubiquinone] 1 alpha subcomplex subunit 5, mitochondrial	EC:7.1.1.2;EC:1.6.99.5;EC:1.6.99.3	C	AT5G52840.1	NADH-ubiquinone_oxidoreductase-like_protein
REFERENCE	evm.model.Ug_unitig_899.458	NADH dehydrogenase [ubiquinone] 1 alpha subcomplex subunit 2-like	EC:7.1.1.2;EC:1.6.99.5;EC:1.6.99.3	C	AT5G47890.1	NADH-ubiquinone_oxidoreductase_B8_subunit
REFERENCE	evm.model.Ug_unitig_749.854	Outer envelope pore protein 16-3, chloroplastic/mitochondrial	EC:7.1.1.2;EC:1.6.99.5;EC:1.6.99.3	U	AT2G42210.2	Mitochondrial_import_inner_membrane_translocase_subunit_Tim17/Tim22/Tim23_family_protein
REFERENCE	evm.model.Ug_unitig_748.679	gamma carbonic anhydrase 1, mitochondrial	EC:7.1.1.2;EC:1.6.99.5;EC:1.6.99.3	S	AT1G47260.1	gamma_carbonic_anhydrase_2
REFERENCE	evm.model.Ug_unitig_744.299	NADH dehydrogenase [ubiquinone] flavoprotein 1, mitochondrial	EC:7.1.1.2;EC:1.6.99.5;EC:1.6.99.3	C	AT5G08530.1	51_kDa_subunit_of_complex_I
REFERENCE	evm.model.Ug_unitig_744.298	NADH dehydrogenase [ubiquinone] flavoprotein 1, mitochondrial	EC:7.1.1.2;EC:1.6.99.5;EC:1.6.99.3	C	AT5G08530.1	51_kDa_subunit_of_complex_I
REFERENCE	evm.model.Ug_unitig_736.433	gamma carbonic anhydrase 1, mitochondrial	EC:7.1.1.2;EC:1.6.99.5;EC:1.6.99.3	S	AT1G19580.1	gamma_carbonic_anhydrase_1
REFERENCE	evm.model.Ug_unitig_736.248	NADH dehydrogenase [ubiquinone] 1 alpha subcomplex subunit 2-like	EC:7.1.1.2;EC:1.6.99.5;EC:1.6.99.3	C	AT5G47890.1	NADH-ubiquinone_oxidoreductase_B8_subunit
REFERENCE	evm.model.Ug_unitig_88.84	NADH dehydrogenase [ubiquinone] iron-sulfur protein 7, mitochondrial	EC:7.1.1.2;EC:1.6.99.5;EC:1.6.99.3	C	AT5G11770.1	NADH-ubiquinone_oxidoreductase_20_kDa_subunit
REFERENCE	evm.model.Ug_unitig_61.204	Gamma carbonic anhydrase-like 2, mitochondrial	EC:7.1.1.2;EC:1.6.99.5;EC:1.6.99.3	S	AT5G63510.1	gamma_carbonic_anhydrase_like_1
REFERENCE	evm.model.Ug_unitig_26.554	External alternative NAD(P)H-ubiquinone oxidoreductase B2, mitochondrial	EC:7.1.1.2;EC:1.6.99.5;EC:1.6.99.3	C	AT4G05020.1	NAD(P)H_dehydrogenase_B2
REFERENCE	evm.model.Ug_unitig_21.776	NADH dehydrogenase [ubiquinone] flavoprotein 1, mitochondrial	EC:7.1.1.2;EC:1.6.99.5;EC:1.6.99.3	C	AT5G08530.1	51_kDa_subunit_of_complex_I
REFERENCE	evm.model.Ug_unitig_0.2259	Nadh dehydrogenase [ubiquinone] iron-sulfur protein 7, mitochondrial	EC:7.1.1.2;EC:1.6.99.5;EC:1.6.99.3	C	AT5G11770.1	NADH-ubiquinone_oxidoreductase_20_kDa_subunit
REFERENCE	evm.model.Ug_unitig_0.996	Gamma carbonic anhydrase-like 2, mitochondrial	EC:7.1.1.2;EC:1.6.99.5;EC:1.6.99.3	S	AT5G63510.1	gamma_carbonic_anhydrase_like_1
[OVER]	EC:2.7.7.6	0.010670640089312502	3.1995922306784115E-5	22	42	2466	15230
TEST	evm.model.Ug_unitig_749.951	Mediator of RNA polymerase II transcription subunit 20	EC:2.7.7.6	E	AT2G28230.1	TATA-binding_related_factor_(TRF)_of_subunit_20_of_Mediator_complex
TEST	evm.model.Ug_unitig_748.301	Putative RNA polymerase III subunit C17	EC:2.7.7.6	K	AT5G62950.7	RNA_polymerase_II%2C_Rpb4%2C_core_protein
TEST	evm.model.Ug_unitig_747.423	UV radiation resistance protein/autophagy-related protein 14	EC:2.7.7.6	S	AT4G08540.1	DNA-directed_RNA_polymerase_II_protein
TEST	evm.model.Ug_unitig_92.96	DNA-directed RNA polymerases I and III subunit RPAC2	EC:2.7.7.6	K	AT2G29540.2	RNApolymerase_14_kDa_subunit
TEST	evm.model.Ug_unitig_92.72	DNA primase	EC:2.7.7.6	L	AT5G41880.1	DNA_primase_POLA3
TEST	evm.model.Ug_unitig_62.493	DNA-directed RNA polymerases I, II, and III subunit RPABC5	EC:2.7.7.6	K	AT1G11475.1	RNA_polymerases_N_/_8_kDa_subunit
TEST	evm.model.Ug_unitig_60.348	DNA-directed RNA polymerase subunit	EC:2.7.7.6	K	AT4G07950.1	DNA-directed_RNA_polymerase%2C_subunit_M%2C_archaeal
TEST	evm.model.Ug_unitig_52.669	DNA-directed RNA polymerase III subunit RPC5-like	EC:2.7.7.6	K	AT5G49530.1	SIN-like_family_protein
TEST	evm.model.Ug_unitig_52.483	putative amidohydrolase YtcJ isoform X1	EC:2.7.7.6	S	AT3G55850.6	Amidohydrolase_family
TEST	evm.model.Ug_unitig_37.903	RNA polymerase beta subunit	EC:2.7.7.6	S	noTAIR	NULL
TEST	evm.model.Ug_unitig_32.857	Dihydrofolate reductase	EC:2.7.7.6	none	AT2G25605.1	DNA-directed_RNA_polymerase_subunit_beta
TEST	evm.model.Ug_unitig_27.304	DNA-directed RNA polymerase III subunit	EC:2.7.7.6	K	AT4G01590.3	DNA-directed_RNA_polymerase_III_subunit
TEST	evm.model.Ug_unitig_26.1137	DNA-directed RNA polymerases II, IV and V subunit 12	EC:2.7.7.6	K	AT5G41010.1	DNA_directed_RNA_polymerase%2C_7_kDa_subunit
TEST	evm.model.Ug_unitig_26.678	DNA-directed RNA polymerases II, IV and V subunit 12	EC:2.7.7.6	K	AT5G41010.1	DNA_directed_RNA_polymerase%2C_7_kDa_subunit
TEST	evm.model.Ug_unitig_26.210	DNA-directed RNA polymerase I subunit rpa49	EC:2.7.7.6	K	AT3G13940.1	DNA_binding_/_DNA-directed_RNA_polymerase
TEST	evm.model.Ug_unitig_22.1472	DNA-directed RNA polymerase subunit	EC:2.7.7.6	K	AT3G25940.1	TFIIB_zinc-binding_protein
TEST	evm.model.Ug_unitig_8.1748	DNA-directed RNA polymerase I subunit RPA43	EC:2.7.7.6	S	AT1G75670.2	DNA-directed_RNA_polymerase
TEST	evm.model.Ug_unitig_8.949	DNA-directed RNA polymerase subunit beta	EC:2.7.7.6	K	noTAIR	NULL
TEST	evm.model.Ug_unitig_0.2194	Dna-directed rna polymerases ii, iv and v subunit 6a	EC:2.7.7.6	K	AT2G04630.1	RNA_polymerase_Rpb6
TEST	evm.model.Ug_unitig_0.2107	DNA-directed RNA polymerases II, IV and V subunit 11-like	EC:2.7.7.6	K	AT3G52090.1	DNA-directed_RNA_polymerase%2C_RBP11-like_protein
TEST	evm.model.Ug_unitig_0.1041	putative uridine kinase C227.14 isoform X1	EC:2.7.1.48;EC:2.7.7.6;EC:2.7.1.33	FH	AT1G03030.1	P-loop_containing_nucleoside_triphosphate_hydrolases_superfamily_protein
TEST	evm.model.Ug_unitig_0.501	DNA-directed RNA polymerase subunit	EC:2.7.7.6	K	AT4G35800.2	RNA_polymerase_II_large_subunit
REFERENCE	evm.model.Ug_unitig_899.503	DNA polymerase	EC:2.7.7.7;EC:2.7.7.6	L	AT5G67100.2	DNA-directed_DNA_polymerase
REFERENCE	evm.model.Ug_unitig_899.451	Dna-directed rna polymerase v subunit 7	EC:2.7.7.6	K	AT4G14660.3	RNA_polymerase_Rpb7-like%2C_N-terminal_domain-containing_protein
REFERENCE	evm.model.Ug_unitig_899.449	Dna-directed rna polymerase v subunit 7	EC:2.7.7.6	K	AT4G14660.3	RNA_polymerase_Rpb7-like%2C_N-terminal_domain-containing_protein
REFERENCE	evm.model.Ug_unitig_899.338	Putative DNA-directed RNA polymerase subunit beta-like	EC:2.7.7.6	none	AT3G16200.1	DNA-directed_RNA_polymerase_subunit_beta
REFERENCE	evm.model.Ug_unitig_748.1393	DNA-directed RNA polymerase	EC:2.7.7.6	KL	AT5G15700.2	DNA/RNA_polymerases_superfamily_protein
REFERENCE	evm.model.Ug_unitig_748.413	Putative DNA-directed RNA polymerase subunit beta-like	EC:2.7.7.6	none	AT3G16200.1	DNA-directed_RNA_polymerase_subunit_beta
REFERENCE	evm.model.Ug_unitig_747.140	DNA-directed RNA polymerase subunit beta	EC:2.7.7.6	none	AT5G64510.1	tunicamycin_induced_protein
REFERENCE	evm.model.Ug_unitig_699.864	DNA primase large subunit	EC:2.7.7.7;EC:2.7.7.6	L	AT1G67320.2	DNA_primase%2C_large_subunit_family
REFERENCE	evm.model.Ug_unitig_699.726	DNA-directed RNA polymerases II and IV subunit 5A	EC:2.7.7.6	K	AT3G22320.1	Eukaryotic_rpb5_RNA_polymerase_subunit_family_protein
REFERENCE	evm.model.Ug_unitig_578.893	Fc receptor-like protein	EC:2.7.7.6	S	AT5G17210.1	transmembrane_protein%2C_putative_(DUF1218)
REFERENCE	evm.model.Ug_unitig_92.117	twinkle homolog protein, chloroplastic/mitochondrial	EC:3.6.1.3;EC:3.6.4.12;EC:2.7.7.6;EC:3.6.1.15	L	AT1G30680.1	toprim_domain-containing_protein
REFERENCE	evm.model.Ug_unitig_52.830	protein DYAD-like	EC:2.7.7.6	S	AT5G51330.1	SWITCH1
REFERENCE	evm.model.Ug_unitig_46.554	DNA-directed RNA polymerase	EC:2.7.7.6	S	AT5G18460.1	carboxyl-terminal_peptidase_(DUF239)
REFERENCE	evm.model.Ug_unitig_46.536	Putative ovule protein	EC:2.7.7.6	none	AT1G45688.1	transmembrane_protein
REFERENCE	evm.model.Ug_unitig_37.782	DNA-directed RNA polymerase	EC:2.7.7.6	K	AT2G24120.1	DNA/RNA_polymerases_superfamily_protein
REFERENCE	evm.model.Ug_unitig_37.572	DNA-directed RNA polymerase III subunit rpc3 isoform X1	EC:2.7.7.6	K	AT3G49000.1	RNA_polymerase_III_subunit_RPC82_family_protein
REFERENCE	evm.model.Ug_unitig_37.348	DNA-directed RNA polymerase	EC:2.7.7.6	S	AT5G18460.1	carboxyl-terminal_peptidase_(DUF239)
REFERENCE	evm.model.Ug_unitig_37.319	Late embryogenesis abundant protein, LEA-14	EC:2.7.7.6	none	AT3G24605.1	late_embryogenesis_abundant_protein%2C_group_2
REFERENCE	evm.model.Ug_unitig_32.539	Calcium-dependent protein kinase 29	EC:2.7.11;EC:2.7.11.17;EC:2.7.7.6	T	AT1G76040.2	calcium-dependent_protein_kinase_29
REFERENCE	evm.model.Ug_unitig_32.388	DNA-directed RNA polymerase subunit	EC:2.7.7.6	K	AT3G57660.2	nuclear_RNA_polymerase_A1
REFERENCE	evm.model.Ug_unitig_32.280	DNA-directed RNA polymerases I and III subunit rpac1-like isoform X1	EC:2.7.7.6	K	AT1G60620.1	RNA_polymerase_I_subunit_43
REFERENCE	evm.model.Ug_unitig_32.26	protein REDUCED WALL ACETYLATION 2-like isoform X1	EC:2.7.7.6;EC:2.3.1.45	S	AT3G06550.1	O-acetyltransferase_family_protein
REFERENCE	evm.model.Ug_unitig_26.1373	DNA-directed RNA polymerases II, IV and V subunit 3	EC:2.7.7.6	K	AT2G15430.1	DNA-directed_RNA_polymerase_family_protein
REFERENCE	evm.model.Ug_unitig_26.1301	Receptor-like protein 12	EC:2.7.11;EC:1.3.1.74;EC:2.7.7.6	S	AT4G03010.1	RNI-like_superfamily_protein
REFERENCE	evm.model.Ug_unitig_26.546	DNA-directed RNA polymerase subunit beta	EC:2.7.7.6	K	AT4G21710.1	DNA-directed_RNA_polymerase_family_protein
REFERENCE	evm.model.Ug_unitig_22.1562	DNA-directed RNA polymerase	EC:2.7.7.6	K	AT1G68990.1	male_gametophyte_defective_3
REFERENCE	evm.model.Ug_unitig_22.1059	ubiquitin-conjugating enzyme E2 32	EC:2.7.7.6	O	AT3G17000.1	ubiquitin-conjugating_enzyme_32
REFERENCE	evm.model.Ug_unitig_22.547	DNA-directed RNA polymerases I, II, and III subunit RPABC3	EC:2.7.7.6	K	AT1G54250.1	RNA_polymerase_Rpb8
REFERENCE	evm.model.Ug_unitig_22.369	DNA-directed RNA polymerase subunit	EC:2.7.7.6	K	AT1G63020.2	nuclear_RNA_polymerase_D1A
REFERENCE	evm.model.Ug_unitig_22.234	DNA-directed RNA polymerase subunit beta	EC:2.7.7.6	K	AT5G45140.2	nuclear_RNA_polymerase_C2
REFERENCE	evm.model.Ug_unitig_21.806	DNA-directed RNA polymerase V subunit 5A	EC:2.7.7.6	K	AT3G57080.1	Eukaryotic_rpb5_RNA_polymerase_subunit_family_protein
REFERENCE	evm.model.Ug_unitig_21.465	Armadillo-like helical	EC:2.7.7.6	UY	AT2G16950.2	transportin_1
REFERENCE	evm.model.Ug_unitig_21.313	DNA-directed RNA polymerase subunit	EC:2.7.7.6	K	AT5G60040.1	nuclear_RNA_polymerase_C1
REFERENCE	evm.model.Ug_unitig_8.1565	Dna-directed rna polymerase i subunit rpa2	EC:2.7.7.6	S	AT4G29400.1	oxidoreductase/transition_metal_ion-binding_protein_(DUF3531)
REFERENCE	evm.model.Ug_unitig_8.950	DNA-directed RNA polymerase subunit beta	EC:2.7.7.6	K	AT1G29940.1	nuclear_RNA_polymerase_A2
REFERENCE	evm.model.Ug_unitig_8.213	ubiquitin-conjugating enzyme E2 32	EC:2.7.7.6	O	AT3G17000.1	ubiquitin-conjugating_enzyme_32
REFERENCE	evm.model.Ug_unitig_8.183	DNA-directed RNA polymerase subunit beta	EC:2.7.7.6	K	AT3G23780.2	nuclear_RNA_polymerase_D2A
REFERENCE	evm.model.Ug_unitig_0.2260	RNA polymerase sigma factor sigC-like	EC:2.7.7.6	K	AT3G53920.1	RNApolymerase_sigma-subunit_C
REFERENCE	evm.model.Ug_unitig_0.1280	DNA-directed RNA polymerase subunit	EC:2.7.7.6	KY	AT2G40030.1	nuclear_RNA_polymerase_D1B
REFERENCE	evm.model.Ug_unitig_0.588	DNA-directed RNA polymerase II subunit RPB7	EC:2.7.7.6	K	AT5G59180.1	DNA-directed_RNA_polymerase_II
REFERENCE	evm.model.Ug_unitig_0.500	DNA-directed RNA polymerase subunit	EC:2.7.7.6	K	AT4G35800.2	RNA_polymerase_II_large_subunit
REFERENCE	evm.model.Ug_unitig_0.499	DNA-directed RNA polymerase subunit	EC:2.7.7.6	K	AT4G35800.2	RNA_polymerase_II_large_subunit
[OVER]	EC:1.6.99.5	0.005990988883724327	1.3472988494132669E-5	13	13	2475	15259
TEST	evm.model.Ug_unitig_899.1090	NADH dehydrogenase [ubiquinone] 1 alpha subcomplex subunit 6	EC:5.2.1.8;EC:7.1.1.2;EC:1.6.99.5;EC:1.6.99.3	C	AT3G12260.1	LYR_family_of_Fe/S_cluster_biogenesis_protein
TEST	evm.model.Ug_unitig_748.1416	NADH dehydrogenase [ubiquinone] iron-sulfur protein 1, mitochondrial	EC:7.1.1.2;EC:1.6.99.5;EC:1.6.99.3	C	AT5G37510.1	NADH-ubiquinone_dehydrogenase
TEST	evm.model.Ug_unitig_748.1374	NADH dehydrogenase [ubiquinone] iron-sulfur protein 4, mitochondrial	EC:7.1.1.2;EC:1.6.99.5;EC:1.6.99.3	C	AT5G67590.1	NADH-ubiquinone_oxidoreductase-like_protein
TEST	evm.model.Ug_unitig_748.462	NADH:ubiquinone reductase (H(+)-translocating)	EC:7.1.1.2;EC:1.6.99.5;EC:1.6.99.3	none	AT4G20150.1	excitatory_amino_acid_transporter
TEST	evm.model.Ug_unitig_747.506	NADH-ubiquinone oxidoreductase 20.9 kDa subunit-like	EC:7.1.1.2;EC:1.6.99.5;EC:1.6.99.3	S	AT4G16450.2	NADH-ubiquinone_oxidoreductase
TEST	evm.model.Ug_unitig_699.571	NADH dehydrogenase [ubiquinone] 1 beta subcomplex subunit 7	EC:7.1.1.2;EC:1.6.99.5;EC:1.6.99.3	C	AT2G02050.1	NADH-ubiquinone_oxidoreductase_B18_subunit
TEST	evm.model.Ug_unitig_26.1290	NADH dehydrogenase [ubiquinone] flavoprotein 2, mitochondrial	EC:7.1.1.2;EC:1.6.99.5;EC:1.6.99.3	C	AT4G02580.1	NADH-ubiquinone_oxidoreductase_24_kDa_subunit
TEST	evm.model.Ug_unitig_26.731	NADH dehydrogenase-like complex L	EC:7.1.1.2;EC:1.6.99.5;EC:1.6.99.3	S	AT1G70760.1	inorganic_carbon_transport_protein-like_protein
TEST	evm.model.Ug_unitig_26.322	NADH:ubiquinone reductase (H(+)-translocating)	EC:7.1.1.2;EC:1.6.99.5;EC:1.6.99.3	none	AT2G31490.1	neuronal_acetylcholine_receptor_subunit_alpha-5
TEST	evm.model.Ug_unitig_22.1026	NADH dehydrogenase [ubiquinone] 1 alpha subcomplex subunit 9 like	EC:7.1.1.2;EC:1.6.99.5;EC:1.6.99.3	C	AT2G20360.1	NAD(P)-binding_Rossmann-fold_superfamily_protein
TEST	evm.model.Ug_unitig_8.1644	NADH dehydrogenase [ubiquinone] 1 alpha subcomplex subunit 12	EC:7.1.1.2;EC:1.6.99.5;EC:1.6.99.3	U	AT4G26965.1	NADH:ubiquinone_oxidoreductase%2C_17.2kDa_subunit
TEST	evm.model.Ug_unitig_0.2139	NADH dehydrogenase [ubiquinone] 1 alpha subcomplex subunit 12	EC:7.1.1.2;EC:1.6.99.5;EC:1.6.99.3	C	AT3G03100.1	NADH:ubiquinone_oxidoreductase%2C_17.2kDa_subunit
TEST	evm.model.Ug_unitig_0.1071	probable NADH dehydrogenase [ubiquinone] 1 alpha subcomplex subunit 5, mitochondrial	EC:7.1.1.2;EC:1.6.99.5;EC:1.6.99.3	C	AT5G52840.1	NADH-ubiquinone_oxidoreductase-like_protein
REFERENCE	evm.model.Ug_unitig_899.458	NADH dehydrogenase [ubiquinone] 1 alpha subcomplex subunit 2-like	EC:7.1.1.2;EC:1.6.99.5;EC:1.6.99.3	C	AT5G47890.1	NADH-ubiquinone_oxidoreductase_B8_subunit
REFERENCE	evm.model.Ug_unitig_749.854	Outer envelope pore protein 16-3, chloroplastic/mitochondrial	EC:7.1.1.2;EC:1.6.99.5;EC:1.6.99.3	U	AT2G42210.2	Mitochondrial_import_inner_membrane_translocase_subunit_Tim17/Tim22/Tim23_family_protein
REFERENCE	evm.model.Ug_unitig_748.679	gamma carbonic anhydrase 1, mitochondrial	EC:7.1.1.2;EC:1.6.99.5;EC:1.6.99.3	S	AT1G47260.1	gamma_carbonic_anhydrase_2
REFERENCE	evm.model.Ug_unitig_744.299	NADH dehydrogenase [ubiquinone] flavoprotein 1, mitochondrial	EC:7.1.1.2;EC:1.6.99.5;EC:1.6.99.3	C	AT5G08530.1	51_kDa_subunit_of_complex_I
REFERENCE	evm.model.Ug_unitig_744.298	NADH dehydrogenase [ubiquinone] flavoprotein 1, mitochondrial	EC:7.1.1.2;EC:1.6.99.5;EC:1.6.99.3	C	AT5G08530.1	51_kDa_subunit_of_complex_I
REFERENCE	evm.model.Ug_unitig_736.433	gamma carbonic anhydrase 1, mitochondrial	EC:7.1.1.2;EC:1.6.99.5;EC:1.6.99.3	S	AT1G19580.1	gamma_carbonic_anhydrase_1
REFERENCE	evm.model.Ug_unitig_736.248	NADH dehydrogenase [ubiquinone] 1 alpha subcomplex subunit 2-like	EC:7.1.1.2;EC:1.6.99.5;EC:1.6.99.3	C	AT5G47890.1	NADH-ubiquinone_oxidoreductase_B8_subunit
REFERENCE	evm.model.Ug_unitig_88.84	NADH dehydrogenase [ubiquinone] iron-sulfur protein 7, mitochondrial	EC:7.1.1.2;EC:1.6.99.5;EC:1.6.99.3	C	AT5G11770.1	NADH-ubiquinone_oxidoreductase_20_kDa_subunit
REFERENCE	evm.model.Ug_unitig_61.204	Gamma carbonic anhydrase-like 2, mitochondrial	EC:7.1.1.2;EC:1.6.99.5;EC:1.6.99.3	S	AT5G63510.1	gamma_carbonic_anhydrase_like_1
REFERENCE	evm.model.Ug_unitig_26.554	External alternative NAD(P)H-ubiquinone oxidoreductase B2, mitochondrial	EC:7.1.1.2;EC:1.6.99.5;EC:1.6.99.3	C	AT4G05020.1	NAD(P)H_dehydrogenase_B2
REFERENCE	evm.model.Ug_unitig_21.776	NADH dehydrogenase [ubiquinone] flavoprotein 1, mitochondrial	EC:7.1.1.2;EC:1.6.99.5;EC:1.6.99.3	C	AT5G08530.1	51_kDa_subunit_of_complex_I
REFERENCE	evm.model.Ug_unitig_0.2259	Nadh dehydrogenase [ubiquinone] iron-sulfur protein 7, mitochondrial	EC:7.1.1.2;EC:1.6.99.5;EC:1.6.99.3	C	AT5G11770.1	NADH-ubiquinone_oxidoreductase_20_kDa_subunit
REFERENCE	evm.model.Ug_unitig_0.996	Gamma carbonic anhydrase-like 2, mitochondrial	EC:7.1.1.2;EC:1.6.99.5;EC:1.6.99.3	S	AT5G63510.1	gamma_carbonic_anhydrase_like_1
[OVER]	EC:1.6.99.3	6.641148220444069E-4	4.97837197934338E-7	18	19	2470	15253
TEST	evm.model.Ug_unitig_899.1090	NADH dehydrogenase [ubiquinone] 1 alpha subcomplex subunit 6	EC:5.2.1.8;EC:7.1.1.2;EC:1.6.99.5;EC:1.6.99.3	C	AT3G12260.1	LYR_family_of_Fe/S_cluster_biogenesis_protein
TEST	evm.model.Ug_unitig_899.56	alternative NAD(P)H-ubiquinone oxidoreductase C1, chloroplastic/mitochondrial isoform X1	EC:1.6.99.3;EC:1.6.5.2	C	AT5G08740.1	NAD(P)H_dehydrogenase_C1
TEST	evm.model.Ug_unitig_749.388	Protein nar1	EC:1.6.99.3	Y	AT4G16440.1	ferredoxin_hydrogenase
TEST	evm.model.Ug_unitig_748.1416	NADH dehydrogenase [ubiquinone] iron-sulfur protein 1, mitochondrial	EC:7.1.1.2;EC:1.6.99.5;EC:1.6.99.3	C	AT5G37510.1	NADH-ubiquinone_dehydrogenase
TEST	evm.model.Ug_unitig_748.1374	NADH dehydrogenase [ubiquinone] iron-sulfur protein 4, mitochondrial	EC:7.1.1.2;EC:1.6.99.5;EC:1.6.99.3	C	AT5G67590.1	NADH-ubiquinone_oxidoreductase-like_protein
TEST	evm.model.Ug_unitig_748.462	NADH:ubiquinone reductase (H(+)-translocating)	EC:7.1.1.2;EC:1.6.99.5;EC:1.6.99.3	none	AT4G20150.1	excitatory_amino_acid_transporter
TEST	evm.model.Ug_unitig_747.506	NADH-ubiquinone oxidoreductase 20.9 kDa subunit-like	EC:7.1.1.2;EC:1.6.99.5;EC:1.6.99.3	S	AT4G16450.2	NADH-ubiquinone_oxidoreductase
TEST	evm.model.Ug_unitig_699.571	NADH dehydrogenase [ubiquinone] 1 beta subcomplex subunit 7	EC:7.1.1.2;EC:1.6.99.5;EC:1.6.99.3	C	AT2G02050.1	NADH-ubiquinone_oxidoreductase_B18_subunit
TEST	evm.model.Ug_unitig_62.552	NADH dehydrogenase	EC:1.6.99.3	S	AT1G67350.2	NADH-ubiquinone_oxidoreductase
TEST	evm.model.Ug_unitig_27.311	dihydropyrimidine dehydrogenase (NADP(+)), chloroplastic	EC:3.5.2.2;EC:1.6.99.3;EC:1.3.1.2	F	AT3G17810.1	pyrimidine_1
TEST	evm.model.Ug_unitig_26.1290	NADH dehydrogenase [ubiquinone] flavoprotein 2, mitochondrial	EC:7.1.1.2;EC:1.6.99.5;EC:1.6.99.3	C	AT4G02580.1	NADH-ubiquinone_oxidoreductase_24_kDa_subunit
TEST	evm.model.Ug_unitig_26.731	NADH dehydrogenase-like complex L	EC:7.1.1.2;EC:1.6.99.5;EC:1.6.99.3	S	AT1G70760.1	inorganic_carbon_transport_protein-like_protein
TEST	evm.model.Ug_unitig_26.322	NADH:ubiquinone reductase (H(+)-translocating)	EC:7.1.1.2;EC:1.6.99.5;EC:1.6.99.3	none	AT2G31490.1	neuronal_acetylcholine_receptor_subunit_alpha-5
TEST	evm.model.Ug_unitig_22.1026	NADH dehydrogenase [ubiquinone] 1 alpha subcomplex subunit 9 like	EC:7.1.1.2;EC:1.6.99.5;EC:1.6.99.3	C	AT2G20360.1	NAD(P)-binding_Rossmann-fold_superfamily_protein
TEST	evm.model.Ug_unitig_22.91	NADH dehydrogenase [ubiquinone] iron-sulfur protein 8, mitochondrial	EC:1.6.99.3	C	AT1G79010.1	Alpha-helical_ferredoxin
TEST	evm.model.Ug_unitig_8.1644	NADH dehydrogenase [ubiquinone] 1 alpha subcomplex subunit 12	EC:7.1.1.2;EC:1.6.99.5;EC:1.6.99.3	U	AT4G26965.1	NADH:ubiquinone_oxidoreductase%2C_17.2kDa_subunit
TEST	evm.model.Ug_unitig_0.2139	NADH dehydrogenase [ubiquinone] 1 alpha subcomplex subunit 12	EC:7.1.1.2;EC:1.6.99.5;EC:1.6.99.3	C	AT3G03100.1	NADH:ubiquinone_oxidoreductase%2C_17.2kDa_subunit
TEST	evm.model.Ug_unitig_0.1071	probable NADH dehydrogenase [ubiquinone] 1 alpha subcomplex subunit 5, mitochondrial	EC:7.1.1.2;EC:1.6.99.5;EC:1.6.99.3	C	AT5G52840.1	NADH-ubiquinone_oxidoreductase-like_protein
REFERENCE	evm.model.Ug_unitig_899.458	NADH dehydrogenase [ubiquinone] 1 alpha subcomplex subunit 2-like	EC:7.1.1.2;EC:1.6.99.5;EC:1.6.99.3	C	AT5G47890.1	NADH-ubiquinone_oxidoreductase_B8_subunit
REFERENCE	evm.model.Ug_unitig_749.854	Outer envelope pore protein 16-3, chloroplastic/mitochondrial	EC:7.1.1.2;EC:1.6.99.5;EC:1.6.99.3	U	AT2G42210.2	Mitochondrial_import_inner_membrane_translocase_subunit_Tim17/Tim22/Tim23_family_protein
REFERENCE	evm.model.Ug_unitig_748.679	gamma carbonic anhydrase 1, mitochondrial	EC:7.1.1.2;EC:1.6.99.5;EC:1.6.99.3	S	AT1G47260.1	gamma_carbonic_anhydrase_2
REFERENCE	evm.model.Ug_unitig_748.508	NAD(P)-binding domain containing protein	EC:1.6.99.3	GM	AT1G32220.1	NAD(P)-binding_Rossmann-fold_superfamily_protein
REFERENCE	evm.model.Ug_unitig_747.744	NAD(P)-binding domain containing protein	EC:5.2.1.8;EC:1.6.99.3	GM	AT5G10730.1	NAD(P)-binding_Rossmann-fold_superfamily_protein
REFERENCE	evm.model.Ug_unitig_744.299	NADH dehydrogenase [ubiquinone] flavoprotein 1, mitochondrial	EC:7.1.1.2;EC:1.6.99.5;EC:1.6.99.3	C	AT5G08530.1	51_kDa_subunit_of_complex_I
REFERENCE	evm.model.Ug_unitig_744.298	NADH dehydrogenase [ubiquinone] flavoprotein 1, mitochondrial	EC:7.1.1.2;EC:1.6.99.5;EC:1.6.99.3	C	AT5G08530.1	51_kDa_subunit_of_complex_I
REFERENCE	evm.model.Ug_unitig_736.433	gamma carbonic anhydrase 1, mitochondrial	EC:7.1.1.2;EC:1.6.99.5;EC:1.6.99.3	S	AT1G19580.1	gamma_carbonic_anhydrase_1
REFERENCE	evm.model.Ug_unitig_736.248	NADH dehydrogenase [ubiquinone] 1 alpha subcomplex subunit 2-like	EC:7.1.1.2;EC:1.6.99.5;EC:1.6.99.3	C	AT5G47890.1	NADH-ubiquinone_oxidoreductase_B8_subunit
REFERENCE	evm.model.Ug_unitig_88.84	NADH dehydrogenase [ubiquinone] iron-sulfur protein 7, mitochondrial	EC:7.1.1.2;EC:1.6.99.5;EC:1.6.99.3	C	AT5G11770.1	NADH-ubiquinone_oxidoreductase_20_kDa_subunit
REFERENCE	evm.model.Ug_unitig_62.126	External alternative NAD(P)H-ubiquinone oxidoreductase	EC:1.6.99.3	C	AT2G20800.1	NAD(P)H_dehydrogenase_B4
REFERENCE	evm.model.Ug_unitig_61.204	Gamma carbonic anhydrase-like 2, mitochondrial	EC:7.1.1.2;EC:1.6.99.5;EC:1.6.99.3	S	AT5G63510.1	gamma_carbonic_anhydrase_like_1
REFERENCE	evm.model.Ug_unitig_52.432	External alternative NAD(P)H-ubiquinone oxidoreductase	EC:1.6.99.3	C	AT2G20800.1	NAD(P)H_dehydrogenase_B4
REFERENCE	evm.model.Ug_unitig_27.260	internal alternative NAD(P)H-ubiquinone oxidoreductase A1, mitochondrial-like	EC:1.6.99.3;EC:1.6.99.1	C	AT2G29990.1	alternative_NAD(P)H_dehydrogenase_2
REFERENCE	evm.model.Ug_unitig_27.259	internal alternative NAD(P)H-ubiquinone oxidoreductase A1, mitochondrial	EC:1.6.99.3;EC:1.6.99.1	C	AT2G29990.1	alternative_NAD(P)H_dehydrogenase_2
REFERENCE	evm.model.Ug_unitig_26.554	External alternative NAD(P)H-ubiquinone oxidoreductase B2, mitochondrial	EC:7.1.1.2;EC:1.6.99.5;EC:1.6.99.3	C	AT4G05020.1	NAD(P)H_dehydrogenase_B2
REFERENCE	evm.model.Ug_unitig_21.776	NADH dehydrogenase [ubiquinone] flavoprotein 1, mitochondrial	EC:7.1.1.2;EC:1.6.99.5;EC:1.6.99.3	C	AT5G08530.1	51_kDa_subunit_of_complex_I
REFERENCE	evm.model.Ug_unitig_0.2259	Nadh dehydrogenase [ubiquinone] iron-sulfur protein 7, mitochondrial	EC:7.1.1.2;EC:1.6.99.5;EC:1.6.99.3	C	AT5G11770.1	NADH-ubiquinone_oxidoreductase_20_kDa_subunit
REFERENCE	evm.model.Ug_unitig_0.996	Gamma carbonic anhydrase-like 2, mitochondrial	EC:7.1.1.2;EC:1.6.99.5;EC:1.6.99.3	S	AT5G63510.1	gamma_carbonic_anhydrase_like_1

## Sheet: Urenif DISPERSED
Tags	Annotation	FDR	P-Value	Nr Test	Nr Reference	Non Annot Test	Non Annot Reference
[OVER]	EC:3.1.26	0.011318242320867996	2.5077346353474144E-5	128	42	16594	10987
TEST	evm.model.scaffold1660_size2643.1	UNC93-like protein 1	EC:3.1.30;EC:3.1.26;EC:3.1.26.4	S	AT1G18010.1	Major_facilitator_superfamily_protein
TEST	evm.model.scaffold1323_size8750.3	Dicer-like protein 3	EC:3.1.30;EC:3.1.26;EC:3.1.26.3	A	AT3G43920.2	dicer-like_3
TEST	evm.model.scaffold1241_size10950.1	Ribonuclease iii domain-containing protein rnc1, chloroplastic	EC:3.1.30;EC:3.1.26;EC:3.1.26.3	S	AT4G37510.1	Ribonuclease_III_family_protein
TEST	evm.model.scaffold1138_size15732.3	ribonucleases P/MRP protein subunit POP1 isoform X1	EC:3.1.30;EC:3.1.26;EC:3.1.26.5	A	AT2G47300.2	ribonuclease_Ps
TEST	evm.model.scaffold1064_size20511.5	Shaggy-related protein kinase alpha	EC:3.1.30;EC:2.7.11;EC:3.1.26;EC:3.1.26.4	T	AT3G05840.2	Protein_kinase_superfamily_protein
TEST	evm.model.scaffold893_size39817.6	probable acyl-activating enzyme 6	EC:3.1.30;EC:3.1.26;EC:3.1.26.4	I	AT5G16370.1	acyl_activating_enzyme_5
TEST	evm.model.scaffold874_size43416.9	nuclear ribonuclease Z-like	EC:3.1.30;EC:3.1.26	S	AT1G74700.1	tRNAse_Z1
TEST	evm.model.scaffold858_size45924.1	ribonucleases P/MRP protein subunit POP1 isoform X1	EC:3.1.30;EC:3.1.26;EC:3.1.26.5	A	AT2G47300.4	ribonuclease_Ps
TEST	evm.model.scaffold852_size47091.11	ribonuclease III domain-containing protein RNC1, chloroplastic	EC:3.1.30;EC:3.1.26;EC:3.1.26.3	S	AT4G37510.1	Ribonuclease_III_family_protein
TEST	evm.model.scaffold759_size74576.3	ribonucleases P/MRP protein subunit POP1 isoform X1	EC:3.1.30;EC:3.1.26;EC:3.1.26.5	A	AT2G47300.2	ribonuclease_Ps
TEST	evm.model.scaffold732_size84355.9	Maturase K	EC:3.1.30;EC:3.1.26;EC:3.1.26.4	L	noTAIR	NULL
TEST	evm.model.scaffold728_size87572.6	Double-stranded RNA-binding protein	EC:3.1.30;EC:3.1.26;EC:3.1.26.3	J	AT1G09700.2	dsRNA-binding_domain-like_superfamily_protein
TEST	evm.model.scaffold728_size87572.4	Proteinaceous rnase p 2	EC:3.1.30;EC:3.1.26;EC:3.1.26.5	V	AT4G21900.1	proteinaceous_RNase_P_3
TEST	evm.model.scaffold705_size94633.13	zinc phosphodiesterase ELAC protein 2-like	EC:3.1.30;EC:3.1.26	U	AT3G16260.3	tRNAse_Z4
TEST	evm.model.scaffold689_size99217.21	Uncharacterized protein	EC:3.1.30;EC:3.1.26;EC:3.1.26.4	S	noTAIR	NULL
TEST	evm.model.scaffold665_size111511.7	Ribonuclease P/MRP, subunit POP	EC:3.1.30;EC:3.1.26;EC:3.1.26.5	A	AT2G47300.3	ribonuclease_Ps
TEST	evm.model.scaffold663_size112132.3	Putative mitochondrial protein	EC:3.1.30;EC:3.1.26;EC:3.1.26.4	E	noTAIR	NULL
TEST	evm.model.scaffold647_size119004.24	Ammonium transporter	EC:3.1.30;EC:3.1.26;EC:3.1.26.4	P	AT4G13510.1	ammonium_transporter_1%3B1
TEST	evm.model.scaffold625_size127502.10	OSJNBb0115I09.5 protein	EC:3.1.30;EC:3.1.26;EC:3.1.26.4	E	noTAIR	NULL
TEST	evm.model.scaffold612_size132011.11	Uncharacterized protein	EC:3.1.30;EC:3.1.26;EC:3.1.26.4	L	noTAIR	NULL
TEST	evm.model.scaffold599_size134888.17	Putative ovule protein	EC:3.1.30;EC:3.1.26;EC:3.1.26.4	L	AT1G24090.1	RNase_H_family_protein
TEST	evm.model.scaffold595_size138481.8	peptidyl-prolyl cis-trans isomerase CYP38, chloroplastic	EC:3.1.30;EC:5.2.1.8;EC:3.1.26;EC:3.1.26.4	O	AT3G01480.1	cyclophilin_38
TEST	evm.model.scaffold579_size144847.2	putative pentatricopeptide repeat-containing protein At5g52630	EC:3.1.30;EC:3.1.26;EC:3.1.26.4	S	AT1G20230.1	Pentatricopeptide_repeat_(PPR)_superfamily_protein
TEST	evm.model.scaffold578_size145013.24	ribonuclease P protein subunit p25-like protein	EC:3.1.30;EC:3.6.1.3;EC:3.1.26;EC:3.1.26.5;EC:3.6.1.15	S	noTAIR	NULL
TEST	evm.model.scaffold573_size148756.41	H0825G02.12 protein	EC:3.1.30;EC:2.7.7.49;EC:3.1.26;EC:2.7.7.7;EC:3.1.26.4	E	noTAIR	NULL
TEST	evm.model.scaffold561_size156615.29	guanylate kinase 2, chloroplastic/mitochondrial-like	EC:2.7.4.4;EC:3.1.30;EC:2.7.4.8;EC:3.1.26;EC:3.1.26.4	F	AT3G06200.1	P-loop_containing_nucleoside_triphosphate_hydrolases_superfamily_protein
TEST	evm.model.scaffold536_size174755.7	Uncharacterized protein	EC:3.1.30;EC:3.1.26;EC:3.1.26.4	L	noTAIR	NULL
TEST	evm.model.scaffold522_size183876.42	zinc phosphodiesterase ELAC protein 2-like	EC:3.1.30;EC:3.1.26	U	AT3G16260.1	tRNAse_Z4
TEST	evm.model.scaffold517_size186048.19	Proteinaceous RNase P 1, chloroplastic/mitochondrial	EC:3.1.30;EC:3.1.26;EC:3.1.26.5	V	AT2G32230.2	proteinaceous_RNase_P_1
TEST	evm.model.scaffold496_size198102.36	DNA/RNA polymerases superfamily protein (Fragment)	EC:3.1.30;EC:2.7.7.49;EC:3.1.26;EC:2.7.7.7;EC:3.1.26.4	E	noTAIR	NULL
TEST	evm.model.scaffold493_size200783.14	stromal 70 kDa heat shock-related protein, chloroplastic-like	EC:3.1.30;EC:3.1.26;EC:3.1.26.4	O	AT4G24280.1	chloroplast_heat_shock_protein_70-1
TEST	evm.model.scaffold483_size203934.1	nuclear ribonuclease Z-like	EC:3.1.30;EC:3.1.26	S	AT1G74700.1	tRNAse_Z1
TEST	evm.model.scaffold470_size212680.21	UNC93-like protein 1	EC:3.1.30;EC:3.1.26;EC:3.1.26.4	S	AT1G18010.1	Major_facilitator_superfamily_protein
TEST	evm.model.scaffold467_size213297.13	OSJNBb0018A10.1 protein	EC:3.1.30;EC:2.7.7.49;EC:3.1.26;EC:2.7.7.7;EC:3.1.26.4	E	noTAIR	NULL
TEST	evm.model.scaffold449_size226149.10	endoribonuclease Dicer homolog 1	EC:3.1.30;EC:3.6.1.3;EC:3.1.26;EC:3.1.26.3;EC:3.6.1.15	A	AT1G01040.1	dicer-like_1
TEST	evm.model.scaffold448_size226196.44	Uncharacterized protein	EC:3.1.30;EC:3.1.26;EC:3.1.26.4	L	noTAIR	NULL
TEST	evm.model.scaffold447_size226588.32	U4/U6 small nuclear ribonucleoprotein PRP4-like protein	EC:3.1.30;EC:3.1.26;EC:3.1.26.4	A	AT2G41500.2	WD-40_repeat_family_protein_/_small_nuclear_ribonucleoprotein_Prp4p-like_protein
TEST	evm.model.scaffold428_size240870.2	Protein ROOT HAIR DEFECTIVE 3 homolog	EC:3.1.30;EC:3.1.26;EC:3.1.26.4;EC:3.6.1.15	S	AT3G13870.2	Root_hair_defective_3_GTP-binding_protein_(RHD3)
TEST	evm.model.scaffold423_size245578.22	DNA/RNA polymerases superfamily protein	EC:3.1.30;EC:3.4.23;EC:3.1.26;EC:3.1.26.4	I	noTAIR	NULL
TEST	evm.model.scaffold422_size246560.15	DNA/RNA polymerases superfamily protein	EC:3.1.30;EC:3.4.23;EC:3.1.26;EC:3.1.26.4	I	noTAIR	NULL
TEST	evm.model.scaffold405_size257100.24	hypothetical protein	EC:3.1.30;EC:3.1.26;EC:3.1.26.4	S	noTAIR	NULL
TEST	evm.model.scaffold378_size277705.26	Uncharacterized protein	EC:3.1.30;EC:3.1.26;EC:3.1.26.4	L	noTAIR	NULL
TEST	evm.model.scaffold374_size280266.55	Galactinol--sucrose galactosyltransferase	EC:3.1.30;EC:3.1.26;EC:2.4.1.82;EC:3.1.26.4	S	AT3G57520.1	seed_imbibition_2
TEST	evm.model.scaffold349_size305835.23	Putative phosphopantothenoylcysteine decarboxylase	EC:3.1.30;EC:3.1.26;EC:3.1.26.4	E	noTAIR	NULL
TEST	evm.model.scaffold331_size322110.13	Uncharacterized protein (Fragment)	EC:3.1.30;EC:3.1.26;EC:3.1.26.4	L	noTAIR	NULL
TEST	evm.model.scaffold313_size338943.66	Uncharacterized protein	EC:3.1.30;EC:3.1.26;EC:3.1.26.4	L	noTAIR	NULL
TEST	evm.model.scaffold286_size357339.24	Alba-like protein C9orf23	EC:3.1.30;EC:3.1.26;EC:3.1.26.5	S	AT3G07030.5	Alba_DNA/RNA-binding_protein
TEST	evm.model.scaffold255_size387927.21	Putative mitochondrial protein	EC:3.1.30;EC:3.1.26;EC:3.1.26.4	E	noTAIR	NULL
TEST	evm.model.scaffold255_size387927.17	DNA/RNA polymerases superfamily protein (Fragment)	EC:3.1.30;EC:3.1.26;EC:3.1.26.4	L	noTAIR	NULL
TEST	evm.model.scaffold250_size394352.36	Uncharacterized protein	EC:3.1.30;EC:3.1.26;EC:3.1.26.4	E	noTAIR	NULL
TEST	evm.model.scaffold238_size410540.29	Equilibrative nucleoside transporter	EC:3.1.30;EC:3.1.26;EC:3.1.26.4	F	AT4G05120.2	Major_facilitator_superfamily_protein
TEST	evm.model.scaffold236_size412999.66	Putative RNase H family protein	EC:3.1.30;EC:3.1.26;EC:3.1.26.4	L	AT3G01410.2	Polynucleotidyl_transferase%2C_ribonuclease_H-like_superfamily_protein
TEST	evm.model.scaffold222_size435352.98	ribonucleases P/MRP protein subunit POP1-like	EC:3.1.30;EC:3.1.26;EC:3.1.26.5	A	AT2G47300.2	ribonuclease_Ps
TEST	evm.model.scaffold221_size436046.43	Uncharacterized protein	EC:3.1.30;EC:3.1.26;EC:3.1.26.4	L	noTAIR	NULL
TEST	evm.model.scaffold218_size439493.2	nuclear ribonuclease Z-like	EC:3.1.30;EC:3.1.26	S	AT1G74700.1	tRNAse_Z1
TEST	evm.model.scaffold203_size463369.27	Maturase K (Fragment)	EC:3.1.30;EC:3.1.26;EC:3.1.26.4	S	noTAIR	NULL
TEST	evm.model.scaffold197_size466181.4	Proteinaceous rnase p 2	EC:3.1.30;EC:3.1.26;EC:3.1.26.5	V	AT4G21900.1	proteinaceous_RNase_P_3
TEST	evm.model.scaffold190_size480112.22	Os11g0617500 protein (Fragment)	EC:3.1.30;EC:3.1.26;EC:3.1.26.4	L	noTAIR	NULL
TEST	evm.model.scaffold180_size499775.1	Serine carboxypeptidase-like 13	EC:3.1.30;EC:3.4.21;EC:3.4.16;EC:3.1.26;EC:3.1.26.4;EC:2.3.1.103	E	AT2G22980.4	serine_carboxypeptidase-like_13
TEST	evm.model.scaffold175_size507515.125	Uncharacterized protein	EC:3.1.30;EC:3.1.26;EC:3.1.26.4	E	noTAIR	NULL
TEST	evm.model.scaffold173_size512803.92	zinc finger protein WIP2-like	EC:3.1.30;EC:3.1.26;EC:3.1.26.5	S	AT3G57670.1	C2H2-type_zinc_finger_family_protein
TEST	evm.model.scaffold173_size512803.56	Uncharacterized protein	EC:3.1.30;EC:3.1.26;EC:3.1.26.4	L	noTAIR	NULL
TEST	evm.model.scaffold173_size512803.7	OO_Ba0013J05-OO_Ba0033A15.25 protein	EC:3.1.30;EC:3.1.26;EC:3.1.26.4	E	noTAIR	NULL
TEST	evm.model.scaffold171_size516701.35	UNC93-like protein 1	EC:3.1.30;EC:3.1.26;EC:3.1.26.4	S	AT1G18010.1	Major_facilitator_superfamily_protein
TEST	evm.model.scaffold166_size521459.66	Ribonuclease iii domain-containing protein rnc1, chloroplastic	EC:3.1.30;EC:3.1.26;EC:3.1.26.3	S	AT4G37510.1	Ribonuclease_III_family_protein
TEST	evm.model.scaffold163_size528813.37	endoribonuclease Dicer homolog 2-like	EC:3.1.30;EC:3.1.26;EC:3.1.26.3	A	AT3G03300.3	dicer-like_2
TEST	evm.model.scaffold151_size559051.101	Uncharacterized protein	EC:3.1.30;EC:3.1.26;EC:3.1.26.4	L	noTAIR	NULL
TEST	evm.model.scaffold151_size559051.96	OSJNBb0018A10.1 protein	EC:3.1.30;EC:2.7.7.49;EC:3.1.26;EC:2.7.7.7;EC:3.1.26.4	E	noTAIR	NULL
TEST	evm.model.scaffold150_size559803.29	Uncharacterized protein	EC:3.1.30;EC:3.1.26;EC:3.1.26.4	L	noTAIR	NULL
TEST	evm.model.scaffold149_size559883.57	Uncharacterized protein	EC:3.1.30;EC:3.1.26;EC:3.1.26.4	L	noTAIR	NULL
TEST	evm.model.scaffold145_size568489.24	DNA/RNA polymerases superfamily protein (Fragment)	EC:3.1.30;EC:2.7.7.49;EC:3.1.26;EC:2.7.7.7;EC:3.1.26.4	E	noTAIR	NULL
TEST	evm.model.scaffold140_size577704.137	Uncharacterized protein	EC:3.1.30;EC:3.1.26;EC:3.1.26.4	L	noTAIR	NULL
TEST	evm.model.scaffold137_size581237.25	Uncharacterized protein	EC:3.1.30;EC:3.1.26;EC:3.1.26.4	L	noTAIR	NULL
TEST	evm.model.scaffold134_size590630.138	hypothetical protein	EC:3.1.30;EC:3.1.26;EC:3.1.26.4	S	noTAIR	NULL
TEST	evm.model.scaffold131_size602077.89	RBR-type E3 ubiquitin transferase	EC:3.1.30;EC:3.1.26;EC:3.1.26.4	O	AT4G19670.7	RING/U-box_superfamily_protein
TEST	evm.model.scaffold130_size602244.186	DNA/RNA polymerase superfamily protein	EC:3.1.30;EC:2.7.7.49;EC:3.1.26;EC:3.1.26.4	L	noTAIR	NULL
TEST	evm.model.scaffold130_size602244.138	Putative mitochondrial protein	EC:3.1.30;EC:3.4.23;EC:2.7.7.49;EC:3.1.26;EC:3.2.1.24;EC:3.1.26.4	G	noTAIR	NULL
TEST	evm.model.scaffold126_size606685.42	DNA/RNA polymerases superfamily protein	EC:3.1.30;EC:3.4.23;EC:3.1.26;EC:3.1.26.4	I	noTAIR	NULL
TEST	evm.model.scaffold126_size606685.34	Uncharacterized protein	EC:3.1.30;EC:3.1.26;EC:3.1.26.4	S	noTAIR	NULL
TEST	evm.model.scaffold121_size616638.110	ribonuclease Z, chloroplastic	EC:3.1.30;EC:3.1.26	S	AT2G04530.1	Metallo-hydrolase/oxidoreductase_superfamily_protein
TEST	evm.model.scaffold118_size635519.106	zinc finger protein WIP2-like	EC:3.1.30;EC:3.1.26;EC:3.1.26.5	S	AT3G20880.1	WIP_domain_protein_4
TEST	evm.model.scaffold117_size639039.143	Protein ROOT HAIR DEFECTIVE 3 homolog	EC:3.1.30;EC:3.1.26;EC:3.1.26.4;EC:3.6.1.15	S	AT3G13870.1	Root_hair_defective_3_GTP-binding_protein_(RHD3)
TEST	evm.model.scaffold116_size639307.127	NAC domain-containing protein 78-like	EC:3.1.30;EC:3.1.26;EC:3.1.26.4	K	AT3G10480.2	NAC_domain_containing_protein_50
TEST	evm.model.scaffold112_size645884.54	Glycosyltransferase	EC:3.1.30;EC:3.1.26;EC:3.1.26.4	G	AT4G01220.1	Nucleotide-diphospho-sugar_transferase_family_protein
TEST	evm.model.scaffold109_size652032.153	Uncharacterized protein	EC:3.1.30;EC:3.1.26;EC:3.1.26.4	L	noTAIR	NULL
TEST	evm.model.scaffold108_size655003.154	OSIGBa0118P15.14 protein	EC:3.1.30;EC:2.7.7.49;EC:3.1.26;EC:2.7.7.7;EC:3.1.26.4	E	noTAIR	NULL
TEST	evm.model.scaffold107_size656107.150	Uncharacterized protein	EC:3.1.30;EC:3.1.26;EC:3.1.26.4	S	noTAIR	NULL
TEST	evm.model.scaffold105_size659173.150	Ubiquitin fusion degradation protein UFD1	EC:3.1.30;EC:3.1.26;EC:3.1.26.4	AO	AT4G15420.2	Ubiquitin_fusion_degradation_UFD1_family_protein
TEST	evm.model.scaffold98_size696804.191	DNA/RNA polymerases superfamily protein	EC:3.1.30;EC:3.4.23;EC:3.1.26;EC:3.1.26.4	L	noTAIR	NULL
TEST	evm.model.scaffold90_size731574.28	DNA/RNA polymerases superfamily protein	EC:3.1.30;EC:3.4.23;EC:3.1.26;EC:3.1.26.4	L	noTAIR	NULL
TEST	evm.model.scaffold86_size753315.188	Ribonuclease P	EC:3.1.30;EC:3.1.26;EC:3.1.26.5	A	AT2G47300.2	ribonuclease_Ps
TEST	evm.model.scaffold77_size793173.146	Uncharacterized protein	EC:3.1.30;EC:3.1.26;EC:3.1.26.4	L	noTAIR	NULL
TEST	evm.model.scaffold70_size835982.22	guanylate kinase 2, chloroplastic/mitochondrial-like	EC:2.7.4.4;EC:3.1.30;EC:2.7.4.8;EC:3.1.26;EC:3.1.26.4	F	AT3G06200.1	P-loop_containing_nucleoside_triphosphate_hydrolases_superfamily_protein
TEST	evm.model.scaffold69_size841560.171	Uncharacterized protein	EC:3.1.30;EC:3.1.26;EC:3.1.26.4	E	noTAIR	NULL
TEST	evm.model.scaffold67_size845796.17	Protein ROOT HAIR DEFECTIVE 3 homolog	EC:3.1.30;EC:3.1.26;EC:3.1.26.4;EC:3.6.1.15	S	AT3G13870.1	Root_hair_defective_3_GTP-binding_protein_(RHD3)
TEST	evm.model.scaffold65_size853472.122	Cysteine proteinase Cathepsin L	EC:3.4.22;EC:3.1.30;EC:3.1.26;EC:3.1.26.4	O	AT1G47128.1	Granulin_repeat_cysteine_protease_family_protein
TEST	evm.model.scaffold57_size904867.212	DNA/RNA polymerases superfamily protein (Fragment)	EC:3.1.30;EC:2.7.7.49;EC:3.1.26;EC:2.7.7.7;EC:3.1.26.4	E	noTAIR	NULL
TEST	evm.model.scaffold49_size979919.33	low-temperature-induced cysteine proteinase-like	EC:3.4.22;EC:3.1.30;EC:3.1.26;EC:3.1.26.4	O	AT1G47128.1	Granulin_repeat_cysteine_protease_family_protein
TEST	evm.model.scaffold47_size1002735.122	zinc finger protein WIP6-like	EC:3.1.30;EC:3.1.26;EC:3.1.26.5	K	AT1G13290.1	C2H2-like_zinc_finger_protein
TEST	evm.model.scaffold44_size1017685.153	probable acyl-activating enzyme 6	EC:3.1.30;EC:3.1.26;EC:3.1.26.4	I	AT5G16370.1	acyl_activating_enzyme_5
TEST	evm.model.scaffold44_size1017685.74	hypothetical protein	EC:3.1.30;EC:3.1.26;EC:3.1.26.4	S	noTAIR	NULL
TEST	evm.model.scaffold36_size1071405.59	Dicer-like protein 4	EC:3.1.30;EC:3.1.26;EC:3.1.26.3	A	AT5G20320.1	dicer-like_4
TEST	evm.model.scaffold35_size1080921.242	Dicer-like 104	EC:3.1.30;EC:3.6.1.3;EC:3.1.26;EC:3.1.26.3;EC:3.6.1.15	A	AT3G43920.2	dicer-like_3
TEST	evm.model.scaffold27_size1214473.15	Uncharacterized protein	EC:3.1.30;EC:3.1.26;EC:3.1.26.4	E	noTAIR	NULL
TEST	evm.model.scaffold26_size1224954.169	Uncharacterized protein	EC:3.1.30;EC:3.1.26;EC:3.1.26.4	L	noTAIR	NULL
TEST	evm.model.scaffold26_size1224954.133	Ribonuclease iii domain-containing protein rnc1, chloroplastic	EC:3.1.30;EC:3.1.26;EC:3.1.26.3	S	AT4G37510.1	Ribonuclease_III_family_protein
TEST	evm.model.scaffold25_size1264610.291	Uncharacterized protein	EC:3.1.30;EC:3.1.26;EC:3.1.26.4	L	noTAIR	NULL
TEST	evm.model.scaffold25_size1264610.206	Uncharacterized protein	EC:3.1.30;EC:3.1.26;EC:3.1.26.4	L	noTAIR	NULL
TEST	evm.model.scaffold22_size1326342.48	Galactinol--sucrose galactosyltransferase	EC:3.1.30;EC:3.1.26;EC:2.4.1.82;EC:3.1.26.4	S	AT3G57520.1	seed_imbibition_2
TEST	evm.model.scaffold20_size1366081.282	ribonucleases P/MRP protein subunit POP1 isoform X1	EC:3.1.30;EC:3.1.26;EC:3.1.26.5	A	AT2G47300.3	ribonuclease_Ps
TEST	evm.model.scaffold19_size1367837.162	Glycosyltransferase family protein 2	EC:3.1.30;EC:3.1.26;EC:3.1.26.4	none	AT5G60700.2	glycosyltransferase_family_protein_2
TEST	evm.model.scaffold18_size1404391.226	Uncharacterized protein	EC:3.1.30;EC:3.1.26;EC:3.1.26.4	L	noTAIR	NULL
TEST	evm.model.scaffold16_size1429268.364	DNA/RNA polymerases superfamily protein (Fragment)	EC:3.1.30;EC:3.1.26;EC:3.1.26.4	L	noTAIR	NULL
TEST	evm.model.scaffold16_size1429268.128	Uncharacterized protein	EC:3.1.30;EC:3.1.26;EC:3.1.26.4	L	noTAIR	NULL
TEST	evm.model.scaffold14_size1455245.261	OSJNBb0060M15.4 protein	EC:3.1.30;EC:2.7.7.49;EC:3.1.26;EC:2.7.7.7;EC:3.1.26.4	E	noTAIR	NULL
TEST	evm.model.scaffold14_size1455245.236	Uncharacterized protein	EC:3.1.30;EC:3.1.26;EC:3.1.26.4	E	noTAIR	NULL
TEST	evm.model.scaffold13_size1475766.115	Maturase K	EC:3.1.30;EC:3.1.26;EC:3.1.26.4	L	noTAIR	NULL
TEST	evm.model.scaffold13_size1475766.91	DNA/RNA polymerases superfamily protein	EC:3.1.30;EC:3.4.23;EC:3.1.26;EC:3.1.26.4	L	noTAIR	NULL
TEST	evm.model.scaffold10_size1516488.379	proteinaceous RNase P 1, chloroplastic/mitochondrial-like	EC:3.1.30;EC:3.1.26;EC:3.1.26.5	V	AT2G32230.2	proteinaceous_RNase_P_1
TEST	evm.model.scaffold10_size1516488.303	Shaggy-related protein kinase alpha	EC:3.1.30;EC:2.7.11;EC:3.1.26;EC:3.1.26.4	T	AT3G05840.2	Protein_kinase_superfamily_protein
TEST	evm.model.scaffold9_size1555044.212	Putative mitochondrial protein	EC:3.1.30;EC:3.4.23;EC:2.7.7.49;EC:3.1.26;EC:3.1.26.4	L	noTAIR	NULL
TEST	evm.model.scaffold8_size1575602.411	Uncharacterized protein	EC:3.1.30;EC:3.1.26;EC:3.1.26.4	S	noTAIR	NULL
TEST	evm.model.scaffold7_size1580086.29	DNA/RNA polymerases superfamily protein (Fragment)	EC:3.1.30;EC:2.7.7.49;EC:3.1.26;EC:2.7.7.7;EC:3.1.26.4	E	noTAIR	NULL
TEST	evm.model.scaffold6_size1644274.262	Ribonuclease iii domain-containing protein rnc1, chloroplastic	EC:3.1.30;EC:3.1.26;EC:3.1.26.3	S	AT4G37510.1	Ribonuclease_III_family_protein
TEST	evm.model.scaffold5_size1651677.180	Cysteine proteinase Cathepsin L	EC:3.4.22;EC:3.1.30;EC:3.1.26;EC:3.1.26.4	O	AT1G47128.1	Granulin_repeat_cysteine_protease_family_protein
TEST	evm.model.scaffold4_size1665106.254	hypothetical protein	EC:3.1.30;EC:3.1.26;EC:3.1.26.4	S	noTAIR	NULL
TEST	evm.model.scaffold2_size1816428.258	OSJNBa0081G05.5 protein	EC:3.1.30;EC:2.7.7.49;EC:3.1.26;EC:2.7.7.7;EC:3.1.26.4	E	noTAIR	NULL
TEST	evm.model.scaffold2_size1816428.119	Alba-like protein C9orf23	EC:3.1.30;EC:3.1.26;EC:3.1.26.5	S	AT3G07030.5	Alba_DNA/RNA-binding_protein
REFERENCE	evm.model.scaffold687_size100329.10	endonuclease V	EC:3.1.30;EC:3.1.21;EC:3.1.26;EC:3.1.21.7	L	AT4G31150.4	endonuclease_V_family_protein
REFERENCE	evm.model.scaffold627_size127100.14	Dicer-like protein 4	EC:3.1.30;EC:3.1.26;EC:3.1.26.3	A	AT5G20320.1	dicer-like_4
REFERENCE	evm.model.scaffold627_size127100.7	Dicer-like protein 4	EC:3.1.30;EC:3.1.26;EC:3.1.26.3	A	AT5G20320.3	dicer-like_4
REFERENCE	evm.model.scaffold623_size127870.24	Cysteine proteinase Cathepsin L	EC:3.4.22;EC:3.1.30;EC:3.1.26;EC:3.1.26.4	O	AT1G47128.1	Granulin_repeat_cysteine_protease_family_protein
REFERENCE	evm.model.scaffold563_size154924.38	Cysteine proteinase Cathepsin L	EC:3.4.22;EC:3.1.30;EC:3.1.26;EC:3.1.26.4	O	AT1G47128.1	Granulin_repeat_cysteine_protease_family_protein
REFERENCE	evm.model.scaffold537_size174685.2	RBR-type E3 ubiquitin transferase	EC:3.1.30;EC:3.1.26;EC:3.1.26.4	O	AT5G60250.1	zinc_finger_(C3HC4-type_RING_finger)_family_protein
REFERENCE	evm.model.scaffold457_size221634.5	Alba-like protein C9orf23	EC:3.1.30;EC:3.1.26;EC:3.1.26.5	S	AT3G07030.5	Alba_DNA/RNA-binding_protein
REFERENCE	evm.model.scaffold440_size235831.19	Aminomethyltransferase	EC:3.1.30;EC:2.1.2.10;EC:3.1.26;EC:3.1.26.4	E	AT1G11860.3	Glycine_cleavage_T-protein_family
REFERENCE	evm.model.scaffold406_size255187.3	ribonucleases P/MRP protein subunit POP1-like	EC:3.1.30;EC:3.1.26;EC:3.1.26.5	A	AT2G47300.2	ribonuclease_Ps
REFERENCE	evm.model.scaffold406_size255187.1	ribonucleases P/MRP protein subunit POP1 isoform X1	EC:3.1.30;EC:3.1.26;EC:3.1.26.5	A	AT2G47300.2	ribonuclease_Ps
REFERENCE	evm.model.scaffold404_size257756.41	endoribonuclease Dicer homolog 3a	EC:3.1.30;EC:3.1.26;EC:3.1.26.3	A	AT3G43920.2	dicer-like_3
REFERENCE	evm.model.scaffold334_size320946.59	probable ribonuclease P/MRP protein subunit POP5	EC:3.1.30;EC:3.1.26;EC:3.1.26.5	J	AT1G04635.1	ribonuclease_P_family_protein_/_Rpp14_family_protein
REFERENCE	evm.model.scaffold300_size346845.69	Sodium/hydrogen exchanger	EC:3.1.30;EC:3.1.26;EC:3.1.26.4	P	AT5G55470.1	Na+/H+_(sodium_hydrogen)_exchanger_3
REFERENCE	evm.model.scaffold291_size352991.35	UNC93-like protein 1	EC:3.1.30;EC:3.1.26;EC:3.1.26.4	S	AT1G18010.1	Major_facilitator_superfamily_protein
REFERENCE	evm.model.scaffold288_size356667.21	probable thiol methyltransferase 2 isoform X1	EC:2.1.1.9;EC:3.1.30;EC:3.1.26;EC:3.1.26.4	S	AT2G43940.1	S-adenosyl-L-methionine-dependent_methyltransferases_superfamily_protein
REFERENCE	evm.model.scaffold272_size369917.80	endoribonuclease Dicer homolog 3a	EC:3.1.30;EC:3.1.26;EC:3.1.26.3	A	AT3G43920.6	dicer-like_3
REFERENCE	evm.model.scaffold250_size394352.7	UNC93-like protein 1	EC:3.1.30;EC:3.1.26;EC:3.1.26.4	S	AT1G18010.1	Major_facilitator_superfamily_protein
REFERENCE	evm.model.scaffold241_size405056.50	Shaggy-related protein kinase alpha	EC:3.1.30;EC:2.7.11;EC:2.7.11.26;EC:3.1.26;EC:3.1.26.4	T	AT5G26751.1	shaggy-related_kinase_11
REFERENCE	evm.model.scaffold236_size412999.52	MADS-box protein JOINTLESS	EC:3.1.30;EC:3.1.26;EC:3.1.26.4	K	AT2G22540.3	K-box_region_and_MADS-box_transcription_factor_family_protein
REFERENCE	evm.model.scaffold236_size412999.51	MADS-box protein JOINTLESS	EC:3.1.30;EC:3.1.26;EC:3.1.26.4	K	AT4G24540.1	AGAMOUS-like_24
REFERENCE	evm.model.scaffold208_size452143.86	Sodium/hydrogen exchanger	EC:3.1.30;EC:3.1.26;EC:3.1.26.4	P	AT5G55470.1	Na+/H+_(sodium_hydrogen)_exchanger_3
REFERENCE	evm.model.scaffold179_size500287.101	RBR-type E3 ubiquitin transferase	EC:3.1.30;EC:3.1.26;EC:3.1.26.4	O	AT5G60250.1	zinc_finger_(C3HC4-type_RING_finger)_family_protein
REFERENCE	evm.model.scaffold161_size531985.129	Villin-2 like	EC:3.1.30;EC:2.7.7.49;EC:3.1.26;EC:3.1.26.4	Z	AT2G41740.2	villin_2
REFERENCE	evm.model.scaffold135_size590554.28	Uncharacterized protein	EC:3.1.30;EC:3.1.26;EC:3.1.26.4	S	noTAIR	NULL
REFERENCE	evm.model.scaffold135_size590554.8	Uncharacterized protein (Fragment)	EC:3.1.30;EC:3.1.26;EC:3.1.26.4	S	noTAIR	NULL
REFERENCE	evm.model.scaffold133_size591675.122	Putative ovule protein	EC:3.1.30;EC:3.1.26;EC:3.1.26.4	L	AT1G24090.1	RNase_H_family_protein
REFERENCE	evm.model.scaffold133_size591675.121	Putative ovule protein	EC:3.1.30;EC:3.1.26;EC:3.1.26.4	L	AT1G24090.1	RNase_H_family_protein
REFERENCE	evm.model.scaffold131_size602077.74	Allantoate deiminase	EC:3.1.30;EC:3.1.26;EC:3.5.3.9;EC:3.1.26.4	E	AT4G20070.1	allantoate_amidohydrolase
REFERENCE	evm.model.scaffold110_size649966.139	DNA/RNA polymerases superfamily protein (Fragment)	EC:3.1.30;EC:3.1.26;EC:3.1.26.4	L	noTAIR	NULL
REFERENCE	evm.model.scaffold86_size753315.187	ribonucleases P/MRP protein subunit POP1-like isoform X1	EC:3.1.30;EC:3.1.26;EC:3.1.26.5	A	AT2G47300.4	ribonuclease_Ps
REFERENCE	evm.model.scaffold86_size753315.186	ribonucleases P/MRP protein subunit POP1-like isoform X1	EC:3.1.30;EC:3.1.26;EC:3.1.26.5	A	AT2G47300.3	ribonuclease_Ps
REFERENCE	evm.model.scaffold85_size755756.139	lariat debranching enzyme	EC:3.1.30;EC:3.1.26	A	AT4G31770.1	debranching_enzyme_1
REFERENCE	evm.model.scaffold74_size818217.134	Shaggy-related protein kinase alpha	EC:3.1.30;EC:2.7.11;EC:2.7.11.26;EC:3.1.26;EC:3.1.26.4	T	AT5G26751.1	shaggy-related_kinase_11
REFERENCE	evm.model.scaffold63_size858018.108	Uncharacterized protein	EC:3.1.30;EC:3.1.26;EC:3.1.26.4	L	noTAIR	NULL
REFERENCE	evm.model.scaffold56_size905644.94	Cop9 signalosome complex subunit 2	EC:3.1.30;EC:3.1.26;EC:3.1.26.4	OT	AT2G26990.1	proteasome_family_protein
REFERENCE	evm.model.scaffold44_size1017685.236	pentatricopeptide repeat-containing protein At2g38420, mitochondrial	EC:3.1.30;EC:3.1.26;EC:3.1.26.3	S	noTAIR	NULL
REFERENCE	evm.model.scaffold44_size1017685.211	pentatricopeptide repeat-containing protein At2g38420, mitochondrial	EC:3.1.30;EC:3.1.26;EC:3.1.26.3	S	AT2G38420.1	Pentatricopeptide_repeat_(PPR)_superfamily_protein
REFERENCE	evm.model.scaffold38_size1053794.51	Ribonuclease	EC:3.1.30;EC:3.1.26;EC:3.1.26.4	L	AT2G25100.1	Polynucleotidyl_transferase%2C_ribonuclease_H-like_superfamily_protein
REFERENCE	evm.model.scaffold31_size1122664.257	Ribonuclease III domain-containing protein	EC:3.1.30;EC:3.1.26;EC:3.1.26.3	J	AT3G13740.1	Ribonuclease_III_family_protein
REFERENCE	evm.model.scaffold25_size1264610.74	60S ribosomal protein l23	EC:3.1.30;EC:3.1.26;EC:3.1.26.4	S	noTAIR	NULL
REFERENCE	evm.model.scaffold23_size1301348.161	Ribonuclease	EC:3.1.30;EC:3.1.26;EC:3.1.26.4	L	AT2G25100.1	Polynucleotidyl_transferase%2C_ribonuclease_H-like_superfamily_protein
REFERENCE	evm.model.scaffold10_size1516488.250	1,4-alpha-glucan-branching enzyme 3, chloroplastic/amyloplastic isoform X1	EC:3.1.30;EC:2.4.1.18;EC:3.1.26;EC:3.1.26.3	G	AT3G20440.3	Alpha_amylase_family_protein
[OVER]	EC:3.1.26.4	0.011318242320867996	1.962650744421972E-5	94	26	16628	11003
TEST	evm.model.scaffold1660_size2643.1	UNC93-like protein 1	EC:3.1.30;EC:3.1.26;EC:3.1.26.4	S	AT1G18010.1	Major_facilitator_superfamily_protein
TEST	evm.model.scaffold1064_size20511.5	Shaggy-related protein kinase alpha	EC:3.1.30;EC:2.7.11;EC:3.1.26;EC:3.1.26.4	T	AT3G05840.2	Protein_kinase_superfamily_protein
TEST	evm.model.scaffold893_size39817.6	probable acyl-activating enzyme 6	EC:3.1.30;EC:3.1.26;EC:3.1.26.4	I	AT5G16370.1	acyl_activating_enzyme_5
TEST	evm.model.scaffold732_size84355.9	Maturase K	EC:3.1.30;EC:3.1.26;EC:3.1.26.4	L	noTAIR	NULL
TEST	evm.model.scaffold689_size99217.21	Uncharacterized protein	EC:3.1.30;EC:3.1.26;EC:3.1.26.4	S	noTAIR	NULL
TEST	evm.model.scaffold663_size112132.3	Putative mitochondrial protein	EC:3.1.30;EC:3.1.26;EC:3.1.26.4	E	noTAIR	NULL
TEST	evm.model.scaffold647_size119004.24	Ammonium transporter	EC:3.1.30;EC:3.1.26;EC:3.1.26.4	P	AT4G13510.1	ammonium_transporter_1%3B1
TEST	evm.model.scaffold625_size127502.10	OSJNBb0115I09.5 protein	EC:3.1.30;EC:3.1.26;EC:3.1.26.4	E	noTAIR	NULL
TEST	evm.model.scaffold612_size132011.11	Uncharacterized protein	EC:3.1.30;EC:3.1.26;EC:3.1.26.4	L	noTAIR	NULL
TEST	evm.model.scaffold599_size134888.17	Putative ovule protein	EC:3.1.30;EC:3.1.26;EC:3.1.26.4	L	AT1G24090.1	RNase_H_family_protein
TEST	evm.model.scaffold595_size138481.8	peptidyl-prolyl cis-trans isomerase CYP38, chloroplastic	EC:3.1.30;EC:5.2.1.8;EC:3.1.26;EC:3.1.26.4	O	AT3G01480.1	cyclophilin_38
TEST	evm.model.scaffold579_size144847.2	putative pentatricopeptide repeat-containing protein At5g52630	EC:3.1.30;EC:3.1.26;EC:3.1.26.4	S	AT1G20230.1	Pentatricopeptide_repeat_(PPR)_superfamily_protein
TEST	evm.model.scaffold573_size148756.41	H0825G02.12 protein	EC:3.1.30;EC:2.7.7.49;EC:3.1.26;EC:2.7.7.7;EC:3.1.26.4	E	noTAIR	NULL
TEST	evm.model.scaffold561_size156615.29	guanylate kinase 2, chloroplastic/mitochondrial-like	EC:2.7.4.4;EC:3.1.30;EC:2.7.4.8;EC:3.1.26;EC:3.1.26.4	F	AT3G06200.1	P-loop_containing_nucleoside_triphosphate_hydrolases_superfamily_protein
TEST	evm.model.scaffold536_size174755.7	Uncharacterized protein	EC:3.1.30;EC:3.1.26;EC:3.1.26.4	L	noTAIR	NULL
TEST	evm.model.scaffold496_size198102.36	DNA/RNA polymerases superfamily protein (Fragment)	EC:3.1.30;EC:2.7.7.49;EC:3.1.26;EC:2.7.7.7;EC:3.1.26.4	E	noTAIR	NULL
TEST	evm.model.scaffold493_size200783.14	stromal 70 kDa heat shock-related protein, chloroplastic-like	EC:3.1.30;EC:3.1.26;EC:3.1.26.4	O	AT4G24280.1	chloroplast_heat_shock_protein_70-1
TEST	evm.model.scaffold470_size212680.21	UNC93-like protein 1	EC:3.1.30;EC:3.1.26;EC:3.1.26.4	S	AT1G18010.1	Major_facilitator_superfamily_protein
TEST	evm.model.scaffold467_size213297.13	OSJNBb0018A10.1 protein	EC:3.1.30;EC:2.7.7.49;EC:3.1.26;EC:2.7.7.7;EC:3.1.26.4	E	noTAIR	NULL
TEST	evm.model.scaffold448_size226196.44	Uncharacterized protein	EC:3.1.30;EC:3.1.26;EC:3.1.26.4	L	noTAIR	NULL
TEST	evm.model.scaffold447_size226588.32	U4/U6 small nuclear ribonucleoprotein PRP4-like protein	EC:3.1.30;EC:3.1.26;EC:3.1.26.4	A	AT2G41500.2	WD-40_repeat_family_protein_/_small_nuclear_ribonucleoprotein_Prp4p-like_protein
TEST	evm.model.scaffold428_size240870.2	Protein ROOT HAIR DEFECTIVE 3 homolog	EC:3.1.30;EC:3.1.26;EC:3.1.26.4;EC:3.6.1.15	S	AT3G13870.2	Root_hair_defective_3_GTP-binding_protein_(RHD3)
TEST	evm.model.scaffold423_size245578.22	DNA/RNA polymerases superfamily protein	EC:3.1.30;EC:3.4.23;EC:3.1.26;EC:3.1.26.4	I	noTAIR	NULL
TEST	evm.model.scaffold422_size246560.15	DNA/RNA polymerases superfamily protein	EC:3.1.30;EC:3.4.23;EC:3.1.26;EC:3.1.26.4	I	noTAIR	NULL
TEST	evm.model.scaffold405_size257100.24	hypothetical protein	EC:3.1.30;EC:3.1.26;EC:3.1.26.4	S	noTAIR	NULL
TEST	evm.model.scaffold378_size277705.26	Uncharacterized protein	EC:3.1.30;EC:3.1.26;EC:3.1.26.4	L	noTAIR	NULL
TEST	evm.model.scaffold374_size280266.55	Galactinol--sucrose galactosyltransferase	EC:3.1.30;EC:3.1.26;EC:2.4.1.82;EC:3.1.26.4	S	AT3G57520.1	seed_imbibition_2
TEST	evm.model.scaffold349_size305835.23	Putative phosphopantothenoylcysteine decarboxylase	EC:3.1.30;EC:3.1.26;EC:3.1.26.4	E	noTAIR	NULL
TEST	evm.model.scaffold331_size322110.13	Uncharacterized protein (Fragment)	EC:3.1.30;EC:3.1.26;EC:3.1.26.4	L	noTAIR	NULL
TEST	evm.model.scaffold313_size338943.66	Uncharacterized protein	EC:3.1.30;EC:3.1.26;EC:3.1.26.4	L	noTAIR	NULL
TEST	evm.model.scaffold255_size387927.21	Putative mitochondrial protein	EC:3.1.30;EC:3.1.26;EC:3.1.26.4	E	noTAIR	NULL
TEST	evm.model.scaffold255_size387927.17	DNA/RNA polymerases superfamily protein (Fragment)	EC:3.1.30;EC:3.1.26;EC:3.1.26.4	L	noTAIR	NULL
TEST	evm.model.scaffold250_size394352.36	Uncharacterized protein	EC:3.1.30;EC:3.1.26;EC:3.1.26.4	E	noTAIR	NULL
TEST	evm.model.scaffold238_size410540.29	Equilibrative nucleoside transporter	EC:3.1.30;EC:3.1.26;EC:3.1.26.4	F	AT4G05120.2	Major_facilitator_superfamily_protein
TEST	evm.model.scaffold236_size412999.66	Putative RNase H family protein	EC:3.1.30;EC:3.1.26;EC:3.1.26.4	L	AT3G01410.2	Polynucleotidyl_transferase%2C_ribonuclease_H-like_superfamily_protein
TEST	evm.model.scaffold221_size436046.43	Uncharacterized protein	EC:3.1.30;EC:3.1.26;EC:3.1.26.4	L	noTAIR	NULL
TEST	evm.model.scaffold203_size463369.27	Maturase K (Fragment)	EC:3.1.30;EC:3.1.26;EC:3.1.26.4	S	noTAIR	NULL
TEST	evm.model.scaffold190_size480112.22	Os11g0617500 protein (Fragment)	EC:3.1.30;EC:3.1.26;EC:3.1.26.4	L	noTAIR	NULL
TEST	evm.model.scaffold180_size499775.1	Serine carboxypeptidase-like 13	EC:3.1.30;EC:3.4.21;EC:3.4.16;EC:3.1.26;EC:3.1.26.4;EC:2.3.1.103	E	AT2G22980.4	serine_carboxypeptidase-like_13
TEST	evm.model.scaffold175_size507515.125	Uncharacterized protein	EC:3.1.30;EC:3.1.26;EC:3.1.26.4	E	noTAIR	NULL
TEST	evm.model.scaffold173_size512803.56	Uncharacterized protein	EC:3.1.30;EC:3.1.26;EC:3.1.26.4	L	noTAIR	NULL
TEST	evm.model.scaffold173_size512803.7	OO_Ba0013J05-OO_Ba0033A15.25 protein	EC:3.1.30;EC:3.1.26;EC:3.1.26.4	E	noTAIR	NULL
TEST	evm.model.scaffold171_size516701.35	UNC93-like protein 1	EC:3.1.30;EC:3.1.26;EC:3.1.26.4	S	AT1G18010.1	Major_facilitator_superfamily_protein
TEST	evm.model.scaffold151_size559051.101	Uncharacterized protein	EC:3.1.30;EC:3.1.26;EC:3.1.26.4	L	noTAIR	NULL
TEST	evm.model.scaffold151_size559051.96	OSJNBb0018A10.1 protein	EC:3.1.30;EC:2.7.7.49;EC:3.1.26;EC:2.7.7.7;EC:3.1.26.4	E	noTAIR	NULL
TEST	evm.model.scaffold150_size559803.29	Uncharacterized protein	EC:3.1.30;EC:3.1.26;EC:3.1.26.4	L	noTAIR	NULL
TEST	evm.model.scaffold149_size559883.57	Uncharacterized protein	EC:3.1.30;EC:3.1.26;EC:3.1.26.4	L	noTAIR	NULL
TEST	evm.model.scaffold145_size568489.24	DNA/RNA polymerases superfamily protein (Fragment)	EC:3.1.30;EC:2.7.7.49;EC:3.1.26;EC:2.7.7.7;EC:3.1.26.4	E	noTAIR	NULL
TEST	evm.model.scaffold140_size577704.137	Uncharacterized protein	EC:3.1.30;EC:3.1.26;EC:3.1.26.4	L	noTAIR	NULL
TEST	evm.model.scaffold137_size581237.25	Uncharacterized protein	EC:3.1.30;EC:3.1.26;EC:3.1.26.4	L	noTAIR	NULL
TEST	evm.model.scaffold134_size590630.138	hypothetical protein	EC:3.1.30;EC:3.1.26;EC:3.1.26.4	S	noTAIR	NULL
TEST	evm.model.scaffold131_size602077.89	RBR-type E3 ubiquitin transferase	EC:3.1.30;EC:3.1.26;EC:3.1.26.4	O	AT4G19670.7	RING/U-box_superfamily_protein
TEST	evm.model.scaffold130_size602244.186	DNA/RNA polymerase superfamily protein	EC:3.1.30;EC:2.7.7.49;EC:3.1.26;EC:3.1.26.4	L	noTAIR	NULL
TEST	evm.model.scaffold130_size602244.138	Putative mitochondrial protein	EC:3.1.30;EC:3.4.23;EC:2.7.7.49;EC:3.1.26;EC:3.2.1.24;EC:3.1.26.4	G	noTAIR	NULL
TEST	evm.model.scaffold126_size606685.42	DNA/RNA polymerases superfamily protein	EC:3.1.30;EC:3.4.23;EC:3.1.26;EC:3.1.26.4	I	noTAIR	NULL
TEST	evm.model.scaffold126_size606685.34	Uncharacterized protein	EC:3.1.30;EC:3.1.26;EC:3.1.26.4	S	noTAIR	NULL
TEST	evm.model.scaffold117_size639039.143	Protein ROOT HAIR DEFECTIVE 3 homolog	EC:3.1.30;EC:3.1.26;EC:3.1.26.4;EC:3.6.1.15	S	AT3G13870.1	Root_hair_defective_3_GTP-binding_protein_(RHD3)
TEST	evm.model.scaffold116_size639307.127	NAC domain-containing protein 78-like	EC:3.1.30;EC:3.1.26;EC:3.1.26.4	K	AT3G10480.2	NAC_domain_containing_protein_50
TEST	evm.model.scaffold112_size645884.54	Glycosyltransferase	EC:3.1.30;EC:3.1.26;EC:3.1.26.4	G	AT4G01220.1	Nucleotide-diphospho-sugar_transferase_family_protein
TEST	evm.model.scaffold109_size652032.153	Uncharacterized protein	EC:3.1.30;EC:3.1.26;EC:3.1.26.4	L	noTAIR	NULL
TEST	evm.model.scaffold108_size655003.154	OSIGBa0118P15.14 protein	EC:3.1.30;EC:2.7.7.49;EC:3.1.26;EC:2.7.7.7;EC:3.1.26.4	E	noTAIR	NULL
TEST	evm.model.scaffold107_size656107.150	Uncharacterized protein	EC:3.1.30;EC:3.1.26;EC:3.1.26.4	S	noTAIR	NULL
TEST	evm.model.scaffold105_size659173.150	Ubiquitin fusion degradation protein UFD1	EC:3.1.30;EC:3.1.26;EC:3.1.26.4	AO	AT4G15420.2	Ubiquitin_fusion_degradation_UFD1_family_protein
TEST	evm.model.scaffold98_size696804.191	DNA/RNA polymerases superfamily protein	EC:3.1.30;EC:3.4.23;EC:3.1.26;EC:3.1.26.4	L	noTAIR	NULL
TEST	evm.model.scaffold90_size731574.28	DNA/RNA polymerases superfamily protein	EC:3.1.30;EC:3.4.23;EC:3.1.26;EC:3.1.26.4	L	noTAIR	NULL
TEST	evm.model.scaffold77_size793173.146	Uncharacterized protein	EC:3.1.30;EC:3.1.26;EC:3.1.26.4	L	noTAIR	NULL
TEST	evm.model.scaffold70_size835982.22	guanylate kinase 2, chloroplastic/mitochondrial-like	EC:2.7.4.4;EC:3.1.30;EC:2.7.4.8;EC:3.1.26;EC:3.1.26.4	F	AT3G06200.1	P-loop_containing_nucleoside_triphosphate_hydrolases_superfamily_protein
TEST	evm.model.scaffold69_size841560.171	Uncharacterized protein	EC:3.1.30;EC:3.1.26;EC:3.1.26.4	E	noTAIR	NULL
TEST	evm.model.scaffold67_size845796.17	Protein ROOT HAIR DEFECTIVE 3 homolog	EC:3.1.30;EC:3.1.26;EC:3.1.26.4;EC:3.6.1.15	S	AT3G13870.1	Root_hair_defective_3_GTP-binding_protein_(RHD3)
TEST	evm.model.scaffold65_size853472.122	Cysteine proteinase Cathepsin L	EC:3.4.22;EC:3.1.30;EC:3.1.26;EC:3.1.26.4	O	AT1G47128.1	Granulin_repeat_cysteine_protease_family_protein
TEST	evm.model.scaffold57_size904867.212	DNA/RNA polymerases superfamily protein (Fragment)	EC:3.1.30;EC:2.7.7.49;EC:3.1.26;EC:2.7.7.7;EC:3.1.26.4	E	noTAIR	NULL
TEST	evm.model.scaffold49_size979919.33	low-temperature-induced cysteine proteinase-like	EC:3.4.22;EC:3.1.30;EC:3.1.26;EC:3.1.26.4	O	AT1G47128.1	Granulin_repeat_cysteine_protease_family_protein
TEST	evm.model.scaffold44_size1017685.153	probable acyl-activating enzyme 6	EC:3.1.30;EC:3.1.26;EC:3.1.26.4	I	AT5G16370.1	acyl_activating_enzyme_5
TEST	evm.model.scaffold44_size1017685.74	hypothetical protein	EC:3.1.30;EC:3.1.26;EC:3.1.26.4	S	noTAIR	NULL
TEST	evm.model.scaffold27_size1214473.15	Uncharacterized protein	EC:3.1.30;EC:3.1.26;EC:3.1.26.4	E	noTAIR	NULL
TEST	evm.model.scaffold26_size1224954.169	Uncharacterized protein	EC:3.1.30;EC:3.1.26;EC:3.1.26.4	L	noTAIR	NULL
TEST	evm.model.scaffold25_size1264610.291	Uncharacterized protein	EC:3.1.30;EC:3.1.26;EC:3.1.26.4	L	noTAIR	NULL
TEST	evm.model.scaffold25_size1264610.206	Uncharacterized protein	EC:3.1.30;EC:3.1.26;EC:3.1.26.4	L	noTAIR	NULL
TEST	evm.model.scaffold22_size1326342.48	Galactinol--sucrose galactosyltransferase	EC:3.1.30;EC:3.1.26;EC:2.4.1.82;EC:3.1.26.4	S	AT3G57520.1	seed_imbibition_2
TEST	evm.model.scaffold19_size1367837.162	Glycosyltransferase family protein 2	EC:3.1.30;EC:3.1.26;EC:3.1.26.4	none	AT5G60700.2	glycosyltransferase_family_protein_2
TEST	evm.model.scaffold18_size1404391.226	Uncharacterized protein	EC:3.1.30;EC:3.1.26;EC:3.1.26.4	L	noTAIR	NULL
TEST	evm.model.scaffold16_size1429268.364	DNA/RNA polymerases superfamily protein (Fragment)	EC:3.1.30;EC:3.1.26;EC:3.1.26.4	L	noTAIR	NULL
TEST	evm.model.scaffold16_size1429268.128	Uncharacterized protein	EC:3.1.30;EC:3.1.26;EC:3.1.26.4	L	noTAIR	NULL
TEST	evm.model.scaffold14_size1455245.261	OSJNBb0060M15.4 protein	EC:3.1.30;EC:2.7.7.49;EC:3.1.26;EC:2.7.7.7;EC:3.1.26.4	E	noTAIR	NULL
TEST	evm.model.scaffold14_size1455245.236	Uncharacterized protein	EC:3.1.30;EC:3.1.26;EC:3.1.26.4	E	noTAIR	NULL
TEST	evm.model.scaffold13_size1475766.115	Maturase K	EC:3.1.30;EC:3.1.26;EC:3.1.26.4	L	noTAIR	NULL
TEST	evm.model.scaffold13_size1475766.91	DNA/RNA polymerases superfamily protein	EC:3.1.30;EC:3.4.23;EC:3.1.26;EC:3.1.26.4	L	noTAIR	NULL
TEST	evm.model.scaffold10_size1516488.303	Shaggy-related protein kinase alpha	EC:3.1.30;EC:2.7.11;EC:3.1.26;EC:3.1.26.4	T	AT3G05840.2	Protein_kinase_superfamily_protein
TEST	evm.model.scaffold9_size1555044.212	Putative mitochondrial protein	EC:3.1.30;EC:3.4.23;EC:2.7.7.49;EC:3.1.26;EC:3.1.26.4	L	noTAIR	NULL
TEST	evm.model.scaffold8_size1575602.411	Uncharacterized protein	EC:3.1.30;EC:3.1.26;EC:3.1.26.4	S	noTAIR	NULL
TEST	evm.model.scaffold7_size1580086.29	DNA/RNA polymerases superfamily protein (Fragment)	EC:3.1.30;EC:2.7.7.49;EC:3.1.26;EC:2.7.7.7;EC:3.1.26.4	E	noTAIR	NULL
TEST	evm.model.scaffold5_size1651677.180	Cysteine proteinase Cathepsin L	EC:3.4.22;EC:3.1.30;EC:3.1.26;EC:3.1.26.4	O	AT1G47128.1	Granulin_repeat_cysteine_protease_family_protein
TEST	evm.model.scaffold4_size1665106.254	hypothetical protein	EC:3.1.30;EC:3.1.26;EC:3.1.26.4	S	noTAIR	NULL
TEST	evm.model.scaffold2_size1816428.258	OSJNBa0081G05.5 protein	EC:3.1.30;EC:2.7.7.49;EC:3.1.26;EC:2.7.7.7;EC:3.1.26.4	E	noTAIR	NULL
REFERENCE	evm.model.scaffold623_size127870.24	Cysteine proteinase Cathepsin L	EC:3.4.22;EC:3.1.30;EC:3.1.26;EC:3.1.26.4	O	AT1G47128.1	Granulin_repeat_cysteine_protease_family_protein
REFERENCE	evm.model.scaffold563_size154924.38	Cysteine proteinase Cathepsin L	EC:3.4.22;EC:3.1.30;EC:3.1.26;EC:3.1.26.4	O	AT1G47128.1	Granulin_repeat_cysteine_protease_family_protein
REFERENCE	evm.model.scaffold537_size174685.2	RBR-type E3 ubiquitin transferase	EC:3.1.30;EC:3.1.26;EC:3.1.26.4	O	AT5G60250.1	zinc_finger_(C3HC4-type_RING_finger)_family_protein
REFERENCE	evm.model.scaffold440_size235831.19	Aminomethyltransferase	EC:3.1.30;EC:2.1.2.10;EC:3.1.26;EC:3.1.26.4	E	AT1G11860.3	Glycine_cleavage_T-protein_family
REFERENCE	evm.model.scaffold300_size346845.69	Sodium/hydrogen exchanger	EC:3.1.30;EC:3.1.26;EC:3.1.26.4	P	AT5G55470.1	Na+/H+_(sodium_hydrogen)_exchanger_3
REFERENCE	evm.model.scaffold291_size352991.35	UNC93-like protein 1	EC:3.1.30;EC:3.1.26;EC:3.1.26.4	S	AT1G18010.1	Major_facilitator_superfamily_protein
REFERENCE	evm.model.scaffold288_size356667.21	probable thiol methyltransferase 2 isoform X1	EC:2.1.1.9;EC:3.1.30;EC:3.1.26;EC:3.1.26.4	S	AT2G43940.1	S-adenosyl-L-methionine-dependent_methyltransferases_superfamily_protein
REFERENCE	evm.model.scaffold250_size394352.7	UNC93-like protein 1	EC:3.1.30;EC:3.1.26;EC:3.1.26.4	S	AT1G18010.1	Major_facilitator_superfamily_protein
REFERENCE	evm.model.scaffold241_size405056.50	Shaggy-related protein kinase alpha	EC:3.1.30;EC:2.7.11;EC:2.7.11.26;EC:3.1.26;EC:3.1.26.4	T	AT5G26751.1	shaggy-related_kinase_11
REFERENCE	evm.model.scaffold236_size412999.52	MADS-box protein JOINTLESS	EC:3.1.30;EC:3.1.26;EC:3.1.26.4	K	AT2G22540.3	K-box_region_and_MADS-box_transcription_factor_family_protein
REFERENCE	evm.model.scaffold236_size412999.51	MADS-box protein JOINTLESS	EC:3.1.30;EC:3.1.26;EC:3.1.26.4	K	AT4G24540.1	AGAMOUS-like_24
REFERENCE	evm.model.scaffold208_size452143.86	Sodium/hydrogen exchanger	EC:3.1.30;EC:3.1.26;EC:3.1.26.4	P	AT5G55470.1	Na+/H+_(sodium_hydrogen)_exchanger_3
REFERENCE	evm.model.scaffold179_size500287.101	RBR-type E3 ubiquitin transferase	EC:3.1.30;EC:3.1.26;EC:3.1.26.4	O	AT5G60250.1	zinc_finger_(C3HC4-type_RING_finger)_family_protein
REFERENCE	evm.model.scaffold161_size531985.129	Villin-2 like	EC:3.1.30;EC:2.7.7.49;EC:3.1.26;EC:3.1.26.4	Z	AT2G41740.2	villin_2
REFERENCE	evm.model.scaffold135_size590554.28	Uncharacterized protein	EC:3.1.30;EC:3.1.26;EC:3.1.26.4	S	noTAIR	NULL
REFERENCE	evm.model.scaffold135_size590554.8	Uncharacterized protein (Fragment)	EC:3.1.30;EC:3.1.26;EC:3.1.26.4	S	noTAIR	NULL
REFERENCE	evm.model.scaffold133_size591675.122	Putative ovule protein	EC:3.1.30;EC:3.1.26;EC:3.1.26.4	L	AT1G24090.1	RNase_H_family_protein
REFERENCE	evm.model.scaffold133_size591675.121	Putative ovule protein	EC:3.1.30;EC:3.1.26;EC:3.1.26.4	L	AT1G24090.1	RNase_H_family_protein
REFERENCE	evm.model.scaffold131_size602077.74	Allantoate deiminase	EC:3.1.30;EC:3.1.26;EC:3.5.3.9;EC:3.1.26.4	E	AT4G20070.1	allantoate_amidohydrolase
REFERENCE	evm.model.scaffold110_size649966.139	DNA/RNA polymerases superfamily protein (Fragment)	EC:3.1.30;EC:3.1.26;EC:3.1.26.4	L	noTAIR	NULL
REFERENCE	evm.model.scaffold74_size818217.134	Shaggy-related protein kinase alpha	EC:3.1.30;EC:2.7.11;EC:2.7.11.26;EC:3.1.26;EC:3.1.26.4	T	AT5G26751.1	shaggy-related_kinase_11
REFERENCE	evm.model.scaffold63_size858018.108	Uncharacterized protein	EC:3.1.30;EC:3.1.26;EC:3.1.26.4	L	noTAIR	NULL
REFERENCE	evm.model.scaffold56_size905644.94	Cop9 signalosome complex subunit 2	EC:3.1.30;EC:3.1.26;EC:3.1.26.4	OT	AT2G26990.1	proteasome_family_protein
REFERENCE	evm.model.scaffold38_size1053794.51	Ribonuclease	EC:3.1.30;EC:3.1.26;EC:3.1.26.4	L	AT2G25100.1	Polynucleotidyl_transferase%2C_ribonuclease_H-like_superfamily_protein
REFERENCE	evm.model.scaffold25_size1264610.74	60S ribosomal protein l23	EC:3.1.30;EC:3.1.26;EC:3.1.26.4	S	noTAIR	NULL
REFERENCE	evm.model.scaffold23_size1301348.161	Ribonuclease	EC:3.1.30;EC:3.1.26;EC:3.1.26.4	L	AT2G25100.1	Polynucleotidyl_transferase%2C_ribonuclease_H-like_superfamily_protein
[OVER]	EC:2.7.7.49	9.938959644631974E-5	7.340442869004412E-8	64	8	16658	11021
TEST	evm.model.scaffold867_size44793.8	Beta-porphyranase	EC:2.7.7.49;EC:2.7.7.7	E	noTAIR	NULL
TEST	evm.model.scaffold607_size133233.25	DNA/RNA polymerases superfamily protein (Fragment)	EC:2.7.7.49;EC:2.7.7.7	E	noTAIR	NULL
TEST	evm.model.scaffold573_size148756.41	H0825G02.12 protein	EC:3.1.30;EC:2.7.7.49;EC:3.1.26;EC:2.7.7.7;EC:3.1.26.4	E	noTAIR	NULL
TEST	evm.model.scaffold518_size185628.42	H0901F07.10 protein	EC:2.7.7.49;EC:2.7.7.7	E	noTAIR	NULL
TEST	evm.model.scaffold517_size186048.32	Beta-porphyranase	EC:2.7.7.49;EC:2.7.7.7	E	noTAIR	NULL
TEST	evm.model.scaffold496_size198102.36	DNA/RNA polymerases superfamily protein (Fragment)	EC:3.1.30;EC:2.7.7.49;EC:3.1.26;EC:2.7.7.7;EC:3.1.26.4	E	noTAIR	NULL
TEST	evm.model.scaffold490_size201484.12	Beta-porphyranase	EC:2.7.7.49;EC:2.7.7.7	E	noTAIR	NULL
TEST	evm.model.scaffold467_size213297.57	DNA/RNA polymerases superfamily protein	EC:3.4.23;EC:2.7.7.49	JKL	noTAIR	NULL
TEST	evm.model.scaffold467_size213297.13	OSJNBb0018A10.1 protein	EC:3.1.30;EC:2.7.7.49;EC:3.1.26;EC:2.7.7.7;EC:3.1.26.4	E	noTAIR	NULL
TEST	evm.model.scaffold438_size236227.22	uncharacterized protein LOC113461697	EC:2.7.7.49;EC:2.7.7.7	E	noTAIR	NULL
TEST	evm.model.scaffold436_size236557.40	uncharacterized protein LOC106752447	EC:2.7.7.49;EC:2.7.7.7	E	noTAIR	NULL
TEST	evm.model.scaffold422_size246560.43	DNA/RNA polymerase superfamily protein	EC:2.7.7.49;EC:2.7.7.7	H	noTAIR	NULL
TEST	evm.model.scaffold386_size274479.17	Putative mitochondrial protein	EC:3.4.23;EC:2.7.7.49;EC:2.7.7.7	L	ATMG00860.1	DNA/RNA_polymerases_superfamily_protein
TEST	evm.model.scaffold380_size276706.8	Putative mitochondrial protein	EC:2.7.7.49;EC:2.7.7.7	E	noTAIR	NULL
TEST	evm.model.scaffold371_size285767.44	uncharacterized protein LOC106780321	EC:2.7.7.49;EC:2.7.7.7	E	noTAIR	NULL
TEST	evm.model.scaffold357_size296716.13	Beta-porphyranase	EC:2.7.7.49;EC:2.7.7.7	E	noTAIR	NULL
TEST	evm.model.scaffold330_size322938.55	uncharacterized protein LOC106752715	EC:2.7.7.49;EC:2.7.7.7	E	noTAIR	NULL
TEST	evm.model.scaffold318_size334380.32	Beta-porphyranase	EC:2.7.7.49;EC:2.7.7.7	E	noTAIR	NULL
TEST	evm.model.scaffold295_size350362.41	Beta-porphyranase	EC:2.7.7.49;EC:2.7.7.7	E	noTAIR	NULL
TEST	evm.model.scaffold291_size352991.72	DNA/RNA polymerases superfamily protein	EC:3.4.23;EC:2.7.7.49	L	noTAIR	NULL
TEST	evm.model.scaffold286_size357339.83	DNA/RNA polymerases superfamily protein	EC:3.4.23;EC:2.7.7.49	JKL	noTAIR	NULL
TEST	evm.model.scaffold273_size369092.48	DNA/RNA polymerases superfamily protein	EC:2.7.7.49;EC:2.7.7.7	L	noTAIR	NULL
TEST	evm.model.scaffold273_size369092.19	Beta-porphyranase	EC:2.7.7.49;EC:2.7.7.7	E	noTAIR	NULL
TEST	evm.model.scaffold224_size434566.40	Maturase K (Fragment)	EC:2.7.7.49;EC:2.7.7.7	L	noTAIR	NULL
TEST	evm.model.scaffold213_size443723.67	OSJNBb0013O03.9 protein	EC:2.7.7.49;EC:2.7.7.7	E	noTAIR	NULL
TEST	evm.model.scaffold200_size464826.150	Beta-porphyranase	EC:2.7.7.49;EC:2.7.7.7	E	noTAIR	NULL
TEST	evm.model.scaffold181_size493926.36	OSJNBb0013O03.9 protein	EC:2.7.7.49;EC:2.7.7.7	E	noTAIR	NULL
TEST	evm.model.scaffold180_size499775.31	Beta-porphyranase	EC:2.7.7.49;EC:2.7.7.7	E	noTAIR	NULL
TEST	evm.model.scaffold176_size503880.64	Os02g0455725 protein	EC:2.7.7.49;EC:2.7.7.7	E	noTAIR	NULL
TEST	evm.model.scaffold175_size507515.59	uncharacterized protein LOC104586267	EC:2.7.7.49;EC:2.7.7.7	E	noTAIR	NULL
TEST	evm.model.scaffold158_size541355.35	uncharacterized protein LOC106780034	EC:2.7.7.49;EC:2.7.7.7	E	noTAIR	NULL
TEST	evm.model.scaffold155_size543531.148	Os02g0455725 protein	EC:2.7.7.49;EC:2.7.7.7	E	noTAIR	NULL
TEST	evm.model.scaffold151_size559051.96	OSJNBb0018A10.1 protein	EC:3.1.30;EC:2.7.7.49;EC:3.1.26;EC:2.7.7.7;EC:3.1.26.4	E	noTAIR	NULL
TEST	evm.model.scaffold146_size566370.24	H0901F07.10 protein	EC:2.7.7.49;EC:2.7.7.7	E	noTAIR	NULL
TEST	evm.model.scaffold145_size568489.24	DNA/RNA polymerases superfamily protein (Fragment)	EC:3.1.30;EC:2.7.7.49;EC:3.1.26;EC:2.7.7.7;EC:3.1.26.4	E	noTAIR	NULL
TEST	evm.model.scaffold130_size602244.186	DNA/RNA polymerase superfamily protein	EC:3.1.30;EC:2.7.7.49;EC:3.1.26;EC:3.1.26.4	L	noTAIR	NULL
TEST	evm.model.scaffold130_size602244.138	Putative mitochondrial protein	EC:3.1.30;EC:3.4.23;EC:2.7.7.49;EC:3.1.26;EC:3.2.1.24;EC:3.1.26.4	G	noTAIR	NULL
TEST	evm.model.scaffold127_size606493.99	Beta-porphyranase	EC:2.7.7.49;EC:2.7.7.7	E	noTAIR	NULL
TEST	evm.model.scaffold108_size655003.154	OSIGBa0118P15.14 protein	EC:3.1.30;EC:2.7.7.49;EC:3.1.26;EC:2.7.7.7;EC:3.1.26.4	E	noTAIR	NULL
TEST	evm.model.scaffold107_size656107.13	Beta-porphyranase	EC:2.7.7.49;EC:2.7.7.7	E	noTAIR	NULL
TEST	evm.model.scaffold102_size677817.63	Beta-porphyranase	EC:2.7.7.49;EC:2.7.7.7	E	noTAIR	NULL
TEST	evm.model.scaffold89_size737138.72	uncharacterized protein LOC104594015	EC:2.7.7.49;EC:2.7.7.7	E	noTAIR	NULL
TEST	evm.model.scaffold85_size755756.56	Beta-porphyranase	EC:3.4.23;EC:2.7.7.49;EC:2.7.7.7	E	noTAIR	NULL
TEST	evm.model.scaffold80_size769704.121	H0209A05.3 protein	EC:2.7.7.49;EC:2.7.7.7	E	noTAIR	NULL
TEST	evm.model.scaffold57_size904867.212	DNA/RNA polymerases superfamily protein (Fragment)	EC:3.1.30;EC:2.7.7.49;EC:3.1.26;EC:2.7.7.7;EC:3.1.26.4	E	noTAIR	NULL
TEST	evm.model.scaffold50_size963328.86	Beta-porphyranase	EC:2.7.7.49;EC:2.7.7.7	E	noTAIR	NULL
TEST	evm.model.scaffold41_size1047198.70	uncharacterized mitochondrial protein ymf40-like	EC:2.7.7.49	S	AT1G30010.1	Intron_maturase%2C_type_II_family_protein
TEST	evm.model.scaffold40_size1048927.214	Beta-porphyranase	EC:2.7.7.49;EC:2.7.7.7	E	noTAIR	NULL
TEST	evm.model.scaffold38_size1053794.180	OSJNBa0087O24.18 protein	EC:2.7.7.49;EC:2.7.7.7	E	noTAIR	NULL
TEST	evm.model.scaffold37_size1057303.154	uncharacterized protein LOC106762069	EC:2.7.7.49;EC:2.7.7.7	E	noTAIR	NULL
TEST	evm.model.scaffold36_size1071405.102	Maturase K (Fragment)	EC:2.7.7.49;EC:2.7.7.7	L	noTAIR	NULL
TEST	evm.model.scaffold33_size1110170.133	Maturase K	EC:2.7.7.49;EC:2.7.7.7	E	noTAIR	NULL
TEST	evm.model.scaffold32_size1119335.245	Beta-porphyranase	EC:2.7.7.49;EC:2.7.7.7	E	noTAIR	NULL
TEST	evm.model.scaffold29_size1161289.236	DNA/RNA polymerases superfamily protein	EC:3.4.23;EC:2.7.7.49;EC:2.7.7.7	H	noTAIR	NULL
TEST	evm.model.scaffold28_size1211183.239	Maturase K (Fragment)	EC:2.7.7.49;EC:2.7.7.7	E	noTAIR	NULL
TEST	evm.model.scaffold20_size1366081.135	DNA/RNA polymerases superfamily protein (Fragment)	EC:2.7.7.49;EC:2.7.7.7	E	noTAIR	NULL
TEST	evm.model.scaffold15_size1429888.137	uncharacterized protein LOC106763689	EC:2.7.7.49;EC:2.7.7.7	E	noTAIR	NULL
TEST	evm.model.scaffold15_size1429888.133	Beta-porphyranase	EC:2.7.7.49;EC:2.7.7.7	E	noTAIR	NULL
TEST	evm.model.scaffold14_size1455245.261	OSJNBb0060M15.4 protein	EC:3.1.30;EC:2.7.7.49;EC:3.1.26;EC:2.7.7.7;EC:3.1.26.4	E	noTAIR	NULL
TEST	evm.model.scaffold11_size1489916.186	uncharacterized mitochondrial protein ymf11	EC:2.7.7.49	S	AT5G46920.1	Intron_maturase%2C_type_II_family_protein
TEST	evm.model.scaffold9_size1555044.212	Putative mitochondrial protein	EC:3.1.30;EC:3.4.23;EC:2.7.7.49;EC:3.1.26;EC:3.1.26.4	L	noTAIR	NULL
TEST	evm.model.scaffold7_size1580086.29	DNA/RNA polymerases superfamily protein (Fragment)	EC:3.1.30;EC:2.7.7.49;EC:3.1.26;EC:2.7.7.7;EC:3.1.26.4	E	noTAIR	NULL
TEST	evm.model.scaffold2_size1816428.258	OSJNBa0081G05.5 protein	EC:3.1.30;EC:2.7.7.49;EC:3.1.26;EC:2.7.7.7;EC:3.1.26.4	E	noTAIR	NULL
TEST	evm.model.scaffold1_size1862935.437	Beta-porphyranase	EC:2.7.7.49;EC:2.7.7.7	E	noTAIR	NULL
REFERENCE	evm.model.scaffold406_size255187.38	Biotin/lipoyl attachment	EC:2.7.7.49;EC:2.7.7.7	L	AT3G15690.2	Single_hybrid_motif_superfamily_protein
REFERENCE	evm.model.scaffold406_size255187.37	Biotin/lipoyl attachment	EC:2.7.7.49;EC:2.7.7.7	L	AT3G15690.2	Single_hybrid_motif_superfamily_protein
REFERENCE	evm.model.scaffold361_size292200.13	Beta-porphyranase	EC:2.7.7.49;EC:2.7.7.7	E	noTAIR	NULL
REFERENCE	evm.model.scaffold164_size528297.43	Group II intron-encoded protein LtrA	EC:2.7.7.49	S	AT5G04050.1	RNA-directed_DNA_polymerase_(reverse_transcriptase)
REFERENCE	evm.model.scaffold161_size531985.129	Villin-2 like	EC:3.1.30;EC:2.7.7.49;EC:3.1.26;EC:3.1.26.4	Z	AT2G41740.2	villin_2
REFERENCE	evm.model.scaffold133_size591675.38	Beta-porphyranase	EC:2.7.7.49;EC:2.7.7.7	E	noTAIR	NULL
REFERENCE	evm.model.scaffold114_size641222.128	OSIGBa0136B09.4 protein	EC:2.7.7.49;EC:2.7.7.7	E	noTAIR	NULL
REFERENCE	evm.model.scaffold104_size664890.91	Biotin/lipoyl attachment	EC:2.7.7.49;EC:2.7.7.7	L	AT3G15690.2	Single_hybrid_motif_superfamily_protein

## Sheet: Ugibba DISPERSED
Tags	Annotation	FDR	P-Value	Nr Test	Nr Reference	Non Annot Test	Non Annot Reference
[OVER]	EC:3.6.1.15	1.4559418210153713E-5	2.1828213208626257E-8	455	349	7911	9045
TEST	evm.model.Ug_unitig_899.1154	DNA gyrase subunit B	EC:3.6.1.3;EC:5.99.1.3;EC:3.6.1.15	B	AT5G04130.1	DNA_GYRASE_B2
TEST	evm.model.Ug_unitig_899.1083	AAA+ ATPase domain-containing protein	EC:3.6.1.3;EC:3.6.1.15	O	AT3G15120.2	P-loop_containing_nucleoside_triphosphate_hydrolases_superfamily_protein
TEST	evm.model.Ug_unitig_899.1033	ABC transporter B family member 19	EC:3.6.1.3;EC:7.6.2.2;EC:3.6.1.15	Q	AT3G28860.1	ATP_binding_cassette_subfamily_B19
TEST	evm.model.Ug_unitig_899.1029	Translation factor GUF1 homolog, mitochondrial	EC:3.6.1.15	J	AT5G39900.1	Small_GTP-binding_protein
TEST	evm.model.Ug_unitig_899.1008	Phospholipid-transporting ATPase	EC:3.6.1.3;EC:7.6.2.1;EC:3.6.1.15	P	AT3G27870.1	ATPase_E1-E2_type_family_protein_/_haloacid_dehalogenase-like_hydrolase_family_protein
TEST	evm.model.Ug_unitig_899.957	DNA mismatch repair protein MSH7 isoform X1	EC:3.6.1.3;EC:3.6.1.15	L	AT3G24495.1	MUTS_homolog_7
TEST	evm.model.Ug_unitig_899.948	Kinesin-like protein	EC:3.6.1.3;EC:3.6.1.15;EC:3.6.4.4	Z	AT1G20060.9	ATP_binding_microtubule_motor_family_protein
TEST	evm.model.Ug_unitig_899.947	Kinesin-like protein	EC:3.6.1.3;EC:3.6.1.15;EC:3.6.4.4	Z	AT1G20060.3	ATP_binding_microtubule_motor_family_protein
TEST	evm.model.Ug_unitig_899.904	V-type proton ATPase subunit E	EC:3.6.1.3;EC:7.1.2.1;EC:3.6.1.15	C	AT4G11150.1	vacuolar_ATP_synthase_subunit_E1
TEST	evm.model.Ug_unitig_899.804	ABC transporter C family member 3	EC:3.6.1.3;EC:7.6.2.2;EC:3.6.1.15	Q	AT3G13080.1	multidrug_resistance-associated_protein_3
TEST	evm.model.Ug_unitig_899.686	Extra-large guanine nucleotide-binding protein 1	EC:3.6.1.15	DT	AT2G23460.1	extra-large_G-protein_1
TEST	evm.model.Ug_unitig_899.676	GDSL esterase/lipase	EC:3.2.1.51;EC:3.6.1.15	S	AT1G54790.3	GDSL-like_Lipase/Acylhydrolase_superfamily_protein
TEST	evm.model.Ug_unitig_899.664	Putative inactive ATP-dependent zinc metalloprotease FTSHI 3, chloroplastic	EC:3.4.24;EC:3.6.1.3;EC:3.6.1.15	O	AT3G02450.1	cell_division_protein_ftsH
TEST	evm.model.Ug_unitig_899.635	putative SWI/SNF-related matrix-associated actin-dependent regulator of chromatin subfamily A member 3-like 1	EC:3.6.1.3;EC:3.6.1.15	A	AT5G05130.1	DNA/RNA_helicase_protein
TEST	evm.model.Ug_unitig_899.560	Abc transporter d family member 1	EC:3.6.1.3;EC:3.6.3.47;EC:3.6.1.15	Q	AT4G39850.4	peroxisomal_ABC_transporter_1
TEST	evm.model.Ug_unitig_899.485	ABC transporter G family member 28-like	EC:3.6.1.3;EC:7.6.2.2;EC:3.6.1.15;EC:3.6.3.17	Q	AT5G60740.1	ABC_transporter_family_protein
TEST	evm.model.Ug_unitig_899.470	Elongation factor 1-alpha	EC:3.6.1.15	J	AT5G60390.3	GTP_binding_Elongation_factor_Tu_family_protein
TEST	evm.model.Ug_unitig_899.419	Dead-box atp-dependent rna helicase 13	EC:3.6.1.3;EC:3.6.4.13;EC:3.6.1.15	A	AT3G16840.1	P-loop_containing_nucleoside_triphosphate_hydrolases_superfamily_protein
TEST	evm.model.Ug_unitig_899.374	DEAD-box ATP-dependent RNA helicase 31-like	EC:3.6.1.3;EC:3.6.4.13;EC:3.6.1.15	A	AT5G63630.2	P-loop_containing_nucleoside_triphosphate_hydrolases_superfamily_protein
TEST	evm.model.Ug_unitig_899.372	Angiotensin-converting enzyme 2	EC:3.6.1.3;EC:3.6.1.15	S	AT3G61700.3	helicase_with_zinc_finger_protein
TEST	evm.model.Ug_unitig_899.305	extra-large guanine nucleotide-binding protein 3	EC:3.6.1.15	T	AT1G31930.6	extra-large_GTP-binding_protein_3
TEST	evm.model.Ug_unitig_899.186	developmentally-regulated G-protein 3	EC:3.6.1.15	T	AT4G39520.1	GTP-binding_protein-like_protein
TEST	evm.model.Ug_unitig_899.167	DEAD-box ATP-dependent RNA helicase 16	EC:3.6.1.3;EC:3.6.4.13;EC:3.6.1.15	A	AT4G34910.1	P-loop_containing_nucleoside_triphosphate_hydrolases_superfamily_protein
TEST	evm.model.Ug_unitig_899.141	ATP-dependent RNA helicase DEAH11, chloroplastic-like	EC:3.6.1.3;EC:3.6.1.15	A	AT5G10370.1	helicase_domain-containing_protein_/_IBR_domain-containing_protein_/_zinc_finger_protein-like_protein
TEST	evm.model.Ug_unitig_899.76	RNA helicase	EC:3.6.1.3;EC:3.6.4.13;EC:3.6.1.15	A	AT2G28600.1	P-loop_containing_nucleoside_triphosphate_hydrolases_superfamily_protein
TEST	evm.model.Ug_unitig_899.75	Pleiotropic drug resistance protein 2	EC:3.6.1.3;EC:3.6.1.15	Q	AT2G36380.1	pleiotropic_drug_resistance_6
TEST	evm.model.Ug_unitig_750.10	probable purine permease 11 isoform X1	EC:3.6.1.15	S	AT1G44750.6	purine_permease_11
TEST	evm.model.Ug_unitig_749.976	DEAD-box ATP-dependent RNA helicase 42	EC:3.6.1.3;EC:3.6.4.13;EC:3.6.1.15	A	AT1G20920.7	P-loop_containing_nucleoside_triphosphate_hydrolases_superfamily_protein
TEST	evm.model.Ug_unitig_749.943	myosin-17-like isoform X1	EC:3.6.1.3;EC:3.6.1.15	Z	AT5G20490.3	myosin_family_protein_with_Dil
TEST	evm.model.Ug_unitig_749.894	probable DEAD-box ATP-dependent RNA helicase 48	EC:3.6.1.3;EC:3.6.1.15	A	AT2G37920.1	copper_ion_transmembrane_transporter
TEST	evm.model.Ug_unitig_749.815	cell division control protein 48 homolog C-like	EC:3.6.1.3;EC:3.6.1.15	O	AT3G01610.2	cell_division_cycle_48C
TEST	evm.model.Ug_unitig_749.801	protein argonaute 10-like	EC:3.6.1.3;EC:3.6.1.15	J	AT5G43810.4	Stabilizer_of_iron_transporter_SufD_/_Polynucleotidyl_transferase
TEST	evm.model.Ug_unitig_749.786	Putative atp-dependent dna helicase chr12	EC:3.6.1.3;EC:3.6.1.15	A	AT3G06010.1	SNF2/Brahma-type_chromatin-remodeling_protein_CHR12
TEST	evm.model.Ug_unitig_749.751	Tubulin alpha chain	EC:3.6.1.15	Z	AT5G19780.1	tubulin_alpha-5
TEST	evm.model.Ug_unitig_749.734	ATP-dependent DNA helicase MER3-like protein	EC:3.6.1.3;EC:3.6.4.12;EC:3.6.4.13;EC:3.6.1.15	A	AT3G27730.7	DNA_helicase_ROCK-N-ROLLERS
TEST	evm.model.Ug_unitig_749.635	Small GTPase superfamily	EC:3.6.1.15	V	AT1G75840.1	RAC-like_GTP_binding_protein_5
TEST	evm.model.Ug_unitig_749.631	Putative alkaline/neutral invertase B	EC:3.2.1.97;EC:3.2.1.20;EC:3.6.1.15;EC:3.2.1.26;EC:3.2.1.48	S	AT4G34860.3	Plant_neutral_invertase_family_protein
TEST	evm.model.Ug_unitig_749.558	ABC transporter C family member 2-like	EC:1.3.1.74;EC:3.6.1.3;EC:3.6.1.15	Q	AT1G30410.6	multidrug_resistance-associated_protein_13
TEST	evm.model.Ug_unitig_749.557	DNA damage-binding protein 1	EC:3.6.1.3;EC:3.6.1.15	L	AT4G05420.1	damaged_DNA_binding_protein_1A
TEST	evm.model.Ug_unitig_748.1450	protein HYPER-SENSITIVITY-RELATED 4-like	EC:3.6.1.3;EC:3.6.1.15	O	AT3G50930.1	cytochrome_BC1_synthesi
TEST	evm.model.Ug_unitig_748.1445	Kinesin-like protein	EC:3.6.1.15	Z	AT3G51150.4	ATP_binding_microtubule_motor_family_protein
TEST	evm.model.Ug_unitig_748.1336	Putative copper-transporting ATPase HMA5	EC:3.6.1.3;EC:7.2.2.10;EC:3.6.1.15	P	AT1G63440.1	heavy_metal_atpase_5
TEST	evm.model.Ug_unitig_748.1279	ABC transporter G family member 11-like	EC:3.6.1.3;EC:7.3.2.2;EC:3.6.1.15	Q	AT1G17840.1	white-brown_complex-like_protein
TEST	evm.model.Ug_unitig_748.1188	Calcium-transporting ATPase	EC:3.6.1.3;EC:7.2.2.10;EC:3.6.1.15	P	AT4G37640.1	calcium_ATPase_2
TEST	evm.model.Ug_unitig_748.1177	ISWI chromatin-remodeling complex ATPase CHR11	EC:3.6.1.3;EC:3.6.1.15	K	AT5G18620.2	chromatin_remodeling_factor17
TEST	evm.model.Ug_unitig_748.1067	ABC transporter B family member 2-like	EC:3.6.1.3;EC:7.6.2.2;EC:3.6.1.15	Q	AT4G25960.1	P-glycoprotein_2
TEST	evm.model.Ug_unitig_748.1055	ABC transporter F family member 3	EC:3.6.1.3;EC:3.6.1.15	EJ	AT1G64550.1	general_control_non-repressible_3
TEST	evm.model.Ug_unitig_748.975	ATP-dependent DNA helicase	EC:3.6.1.3;EC:3.6.4.12;EC:3.6.1.15	L	AT1G31360.1	RECQ_helicase_L2
TEST	evm.model.Ug_unitig_748.916	DEAD-box ATP-dependent RNA helicase 20 isoform X1	EC:3.6.1.3;EC:3.6.1.15	A	AT1G55150.1	DEA(D/H)-box_RNA_helicase_family_protein
TEST	evm.model.Ug_unitig_748.893	Calcium-transporting ATPase	EC:3.6.1.3;EC:7.2.2.10;EC:3.6.1.15	P	AT3G21180.1	autoinhibited_Ca(2+)-ATPase_9
TEST	evm.model.Ug_unitig_748.892	Calcium-transporting ATPase	EC:3.6.1.3;EC:7.2.2.10;EC:3.6.1.15	P	AT3G21180.1	autoinhibited_Ca(2+)-ATPase_9
TEST	evm.model.Ug_unitig_748.725	Abc transporter c family member 2	EC:3.6.3.16;EC:3.6.1.3;EC:7.6.2.2;EC:3.6.1.15	Q	AT2G34660.2	multidrug_resistance-associated_protein_2
TEST	evm.model.Ug_unitig_748.659	Dynamin-2A like	EC:3.6.1.15	U	AT1G59610.1	dynamin-like_3
TEST	evm.model.Ug_unitig_748.644	ATP-dependent zinc metalloprotease FTSH, chloroplastic	EC:3.4.24;EC:3.6.1.3;EC:3.6.1.15	O	AT5G42270.1	FtsH_extracellular_protease_family
TEST	evm.model.Ug_unitig_748.629	Peroxisome biogenesis protein 1	EC:3.6.1.3;EC:3.6.1.15	O	AT5G08470.1	peroxisome_1
TEST	evm.model.Ug_unitig_748.583	ATP-dependent zinc metalloprotease FTSH 12, chloroplastic	EC:3.4.24;EC:3.6.1.3;EC:3.6.3.52;EC:7.4.2.5;EC:3.6.1.15;EC:3.6.4.3	O	AT1G79560.1	FTSH_protease_12
TEST	evm.model.Ug_unitig_748.528	myosin-15 isoform X1	EC:3.6.1.3;EC:3.6.1.15	Z	AT4G33200.1	myosin
TEST	evm.model.Ug_unitig_748.452	V-type proton ATPase catalytic subunit A	EC:3.6.1.3;EC:7.1.2.1;EC:3.6.1.15	C	AT1G78900.2	vacuolar_ATP_synthase_subunit_A
TEST	evm.model.Ug_unitig_748.346	endonuclease MutS2-like isoform X1	EC:3.6.1.3;EC:3.6.1.15	L	AT5G54090.1	DNA_mismatch_repair_protein_MutS%2C_type_2
TEST	evm.model.Ug_unitig_748.331	myosin-6 isoform X1	EC:3.6.1.15	Z	AT5G43900.3	myosin_2
TEST	evm.model.Ug_unitig_748.265	kinesin-like calmodulin-binding protein	EC:3.6.1.3;EC:3.6.4.5;EC:3.6.1.15	Z	AT5G65930.2	kinesin-like_calmodulin-binding_protein_(ZWICHEL)
TEST	evm.model.Ug_unitig_748.218	Plasma membrane ATPase	EC:3.6.1.3;EC:7.1.2.1;EC:6.1.1.6;EC:3.6.1.15	P	AT4G30190.1	H[+]-ATPase_2
TEST	evm.model.Ug_unitig_748.163	PDR protein 5	EC:3.6.1.3;EC:3.6.1.15	Q	AT2G26910.1	pleiotropic_drug_resistance_4
TEST	evm.model.Ug_unitig_748.143	ABC transporter C family member 9	EC:3.6.1.3;EC:7.6.2.2;EC:3.6.1.15	Q	AT3G60160.1	multidrug_resistance-associated_protein_9
TEST	evm.model.Ug_unitig_748.24	Ras-related protein rab11c	EC:3.6.1.15	U	AT1G07410.1	RAB_GTPase_homolog_A2B
TEST	evm.model.Ug_unitig_747.836	Vesicle-fusing ATPase	EC:3.6.1.3;EC:3.6.1.15	O	AT4G04910.1	AAA-type_ATPase_family_protein
TEST	evm.model.Ug_unitig_747.825	RuvB-like helicase	EC:3.6.1.3;EC:3.6.4.12;EC:3.6.1.15	L	AT5G22330.1	P-loop_containing_nucleoside_triphosphate_hydrolases_superfamily_protein
TEST	evm.model.Ug_unitig_747.812	116 kDa U5 small nuclear ribonucleoprotein component-like	EC:3.6.1.15	J	AT1G06220.3	Ribosomal_protein_S5/Elongation_factor_G/III/V_family_protein
TEST	evm.model.Ug_unitig_747.758	ABC transporter G family member 14	EC:3.6.1.3;EC:3.6.1.15	Q	AT1G31770.1	ATP-binding_cassette_14
TEST	evm.model.Ug_unitig_747.702	AAA+-type ATPase	EC:3.6.1.3;EC:3.6.1.15;EC:3.6.4.3	O	AT4G28000.1	P-loop_containing_nucleoside_triphosphate_hydrolases_superfamily_protein
TEST	evm.model.Ug_unitig_747.699	Abc transporter c family member 10	EC:1.3.1.74;EC:3.6.1.3;EC:7.6.2.2;EC:3.6.1.15	Q	AT3G59140.1	multidrug_resistance-associated_protein_14
TEST	evm.model.Ug_unitig_747.632	Dna mismatch repair protein mlh3	EC:3.6.1.3;EC:3.6.1.15	L	AT4G35520.3	MUTL_protein_homolog_3
TEST	evm.model.Ug_unitig_747.597	ABC transporter F family member 5	EC:3.6.1.3;EC:3.6.1.15	S	AT5G64840.1	general_control_non-repressible_5
TEST	evm.model.Ug_unitig_747.556	kinesin-like protein KIN12B	EC:3.6.1.3;EC:3.6.1.15;EC:3.6.4.4	Z	AT4G14150.1	phragmoplast-associated_kinesin-related_protein_1
TEST	evm.model.Ug_unitig_747.529	MSH1 (Fragment)	EC:3.6.1.3;EC:3.6.1.15	L	AT3G24320.2	MUTL_protein_homolog_1
TEST	evm.model.Ug_unitig_747.463	translation initiation factor IF-2, chloroplastic	EC:3.6.1.15	J	AT1G17220.1	Translation_initiation_factor_2%2C_small_GTP-binding_protein
TEST	evm.model.Ug_unitig_747.274	GTP-binding nuclear protein	EC:3.6.1.15	U	AT5G55190.1	RAN_GTPase_3
TEST	evm.model.Ug_unitig_747.252	Phospholipid-transporting ATPase	EC:3.6.1.3;EC:7.6.2.1;EC:3.6.1.15	P	AT5G04930.1	aminophospholipid_ATPase_1
TEST	evm.model.Ug_unitig_747.246	DEAD-box ATP-dependent RNA helicase 5	EC:3.6.1.3;EC:3.6.4.13;EC:2.3.1.225;EC:3.6.1.15	A	AT1G31970.1	DEA(D/H)-box_RNA_helicase_family_protein
TEST	evm.model.Ug_unitig_747.228	ATP-dependent DNA helicase	EC:3.6.1.3;EC:3.6.4.12;EC:3.6.1.15	L	AT3G05740.1	RECQ_helicase_l1
TEST	evm.model.Ug_unitig_747.227	Kinesin-like protein	EC:3.6.1.3;EC:3.6.4.5;EC:3.6.1.15	Z	AT2G47500.1	P-loop_nucleoside_triphosphate_hydrolases_superfamily_protein_with_CH_(Calponin_Homology)_domain-containing_protein
TEST	evm.model.Ug_unitig_747.38	putative ABC transporter C family member 15	EC:7.6.2.3;EC:3.6.1.3;EC:7.6.2.2;EC:3.6.1.15	Q	AT3G13080.1	multidrug_resistance-associated_protein_3
TEST	evm.model.Ug_unitig_746.303	DExH-box ATP-dependent RNA helicase	EC:3.6.1.3;EC:3.6.4.13;EC:3.6.1.15	A	AT1G48650.1	DEA(D/H)-box_RNA_helicase_family_protein
TEST	evm.model.Ug_unitig_746.293	Phospholipid-transporting ATPase	EC:3.6.1.3;EC:7.6.2.1;EC:3.6.1.15	P	AT5G04930.1	aminophospholipid_ATPase_1
TEST	evm.model.Ug_unitig_746.292	Phospholipid-transporting ATPase	EC:3.6.1.3;EC:7.6.2.1;EC:3.6.1.15	P	AT5G04930.1	aminophospholipid_ATPase_1
TEST	evm.model.Ug_unitig_746.273	Ras-related protein RABA1f	EC:3.6.1.15	U	AT5G60860.1	RAB_GTPase_homolog_A1F
TEST	evm.model.Ug_unitig_746.243	DEAD-box ATP-dependent RNA helicase 37-like	EC:3.6.1.3;EC:3.6.4.13;EC:3.6.1.15	A	AT2G42520.3	P-loop_containing_nucleoside_triphosphate_hydrolases_superfamily_protein
TEST	evm.model.Ug_unitig_744.664	cell division protein FtsZ homolog 2-1, chloroplastic-like	EC:3.6.1.15	D	AT3G52750.3	Tubulin/FtsZ_family_protein
TEST	evm.model.Ug_unitig_744.663	Cell division protein FtsZ	EC:3.6.1.15	D	AT2G36250.3	Tubulin/FtsZ_family_protein
TEST	evm.model.Ug_unitig_744.634	ABC transporter G family member 20-like	EC:3.6.1.3;EC:3.6.1.15	Q	AT2G37360.1	ABC-2_type_transporter_family_protein
TEST	evm.model.Ug_unitig_744.515	ras-related protein RABA1f-like	EC:3.6.1.15	U	AT5G60860.1	RAB_GTPase_homolog_A1F
TEST	evm.model.Ug_unitig_744.482	Obg-like ATPase 1	EC:3.6.1.3;EC:3.6.1.15	J	AT1G56050.1	GTP-binding_protein-like_protein
TEST	evm.model.Ug_unitig_744.463	Calcium-transporting ATPase	EC:3.6.1.3;EC:7.1.2.1;EC:7.2.2.10;EC:3.6.1.15;EC:7.2.2.5	P	AT1G10130.1	endoplasmic_reticulum-type_calcium-transporting_ATPase_3
TEST	evm.model.Ug_unitig_744.458	DNA mismatch repair protein MSH4	EC:3.6.1.3;EC:3.6.1.15	L	AT4G17380.1	MUTS-like_protein_4
TEST	evm.model.Ug_unitig_744.441	Signal recognition particle 54 kDa protein	EC:3.6.1.15	U	AT1G48900.1	Signal_recognition_particle%2C_SRP54_subunit_protein
TEST	evm.model.Ug_unitig_744.440	V-type proton ATPase subunit c1	EC:3.6.1.3;EC:7.1.2.1;EC:3.6.1.15	P	AT4G32530.1	ATPase%2C_F0/V0_complex%2C_subunit_C_protein
TEST	evm.model.Ug_unitig_744.435	probable ATP-dependent DNA helicase DDX11	EC:3.6.1.3;EC:3.6.1.15	L	AT1G79890.4	RAD3-like_DNA-binding_helicase_protein
TEST	evm.model.Ug_unitig_744.434	probable ATP-dependent DNA helicase DDX11	EC:3.6.1.3;EC:3.6.4.12;EC:3.6.1.15	L	AT1G79890.1	RAD3-like_DNA-binding_helicase_protein
TEST	evm.model.Ug_unitig_744.425	Lon protease homolog 2, peroxisomal	EC:3.4.21;EC:3.6.1.3;EC:3.6.1.15	O	AT5G47040.1	lon_protease_2
TEST	evm.model.Ug_unitig_744.422	DEAD-box ATP-dependent RNA helicase 10	EC:3.6.1.3;EC:3.6.4.13;EC:3.6.1.15	A	AT5G60990.1	DEA(D/H)-box_RNA_helicase_family_protein
TEST	evm.model.Ug_unitig_744.103	ras-related protein Rab7	EC:3.6.1.15	U	AT4G09720.1	RAB_GTPase_homolog_G3A
TEST	evm.model.Ug_unitig_736.508	Phospholipid-transporting ATPase	EC:3.6.1.3;EC:7.6.2.1;EC:3.6.1.15	P	AT5G04930.1	aminophospholipid_ATPase_1
TEST	evm.model.Ug_unitig_736.506	ATP-dependent Clp protease proteolytic subunit	EC:3.4.21;EC:3.6.1.3;EC:3.6.1.15	O	AT5G45390.1	CLP_protease_P4
TEST	evm.model.Ug_unitig_736.460	ABC transporter G family member 5-like	EC:3.6.1.3;EC:3.6.1.15	Q	AT2G13610.1	ABC-2_type_transporter_family_protein
TEST	evm.model.Ug_unitig_736.298	Dead-box atp-dependent rna helicase 58, chloroplastic	EC:3.6.1.3;EC:3.6.4.13;EC:3.6.1.15	A	AT5G19210.2	P-loop_containing_nucleoside_triphosphate_hydrolases_superfamily_protein
TEST	evm.model.Ug_unitig_736.216	Abc transporter g family member 3	EC:3.6.1.3;EC:3.6.3.25;EC:7.3.2.2;EC:7.3.2.3;EC:3.6.1.15	Q	AT2G28070.2	ABC-2_type_transporter_family_protein
TEST	evm.model.Ug_unitig_736.156	DExH-box ATP-dependent RNA helicase DExH18, mitochondrial-like	EC:3.4.21;EC:3.6.1.3;EC:3.6.4.12;EC:3.6.4.13;EC:3.6.1.15	A	AT5G39840.1	ATP-dependent_RNA_helicase
TEST	evm.model.Ug_unitig_736.133	RNA helicase	EC:3.6.1.3;EC:3.6.4.13;EC:3.6.1.15	A	AT2G28600.1	P-loop_containing_nucleoside_triphosphate_hydrolases_superfamily_protein
TEST	evm.model.Ug_unitig_736.100	PDR protein 5	EC:3.6.1.3;EC:3.6.1.15	Q	AT2G26910.1	pleiotropic_drug_resistance_4
TEST	evm.model.Ug_unitig_736.53	ABC transporter B family member 1	EC:3.6.1.3;EC:7.6.2.2;EC:3.6.1.15	Q	AT3G28860.1	ATP_binding_cassette_subfamily_B19
TEST	evm.model.Ug_unitig_699.644	fidgetin-like protein 1	EC:3.6.1.3;EC:3.6.1.15;EC:3.6.4.3	O	AT3G27120.1	P-loop_containing_nucleoside_triphosphate_hydrolases_superfamily_protein
TEST	evm.model.Ug_unitig_699.642	Replication factor C subunit 1	EC:3.6.1.3;EC:3.6.1.15	L	AT5G22010.1	replication_factor_C1
TEST	evm.model.Ug_unitig_699.497	ATPase WRNIP1	EC:3.6.1.3;EC:3.6.1.15	O	AT1G24290.1	AAA-type_ATPase_family_protein
TEST	evm.model.Ug_unitig_699.413	Protein accumulation and replication of chloroplasts 3	EC:3.6.1.15	S	AT1G75010.1	GTP_binding_protein
TEST	evm.model.Ug_unitig_699.150	putative SWI/SNF-related matrix-associated actin-dependent regulator of chromatin subfamily A member 3-like 2 isoform X1	EC:3.6.1.3;EC:3.6.1.15	KL	AT5G22750.1	DNA/RNA_helicase_protein
TEST	evm.model.Ug_unitig_699.145	V-type proton ATPase subunit E	EC:3.6.1.3;EC:7.1.2.1;EC:3.6.1.15	C	AT4G11150.1	vacuolar_ATP_synthase_subunit_E1
TEST	evm.model.Ug_unitig_699.142	GTPase LSG1-2	EC:3.6.1.15	S	AT1G08410.1	P-loop_containing_nucleoside_triphosphate_hydrolases_superfamily_protein
TEST	evm.model.Ug_unitig_699.120	Protein CHROMATIN REMODELING 5	EC:3.6.1.3;EC:3.6.1.15	K	AT2G13370.3	chromatin_remodeling_5
TEST	evm.model.Ug_unitig_699.29	helicase-like transcription factor CHR28 isoform X1	EC:3.6.1.3;EC:3.6.4.12;EC:3.6.1.15	L	AT1G50410.3	SNF2_domain-containing_protein_/_helicase_domain-containing_protein_/_zinc_finger_protein-like_protein
TEST	evm.model.Ug_unitig_578.681	ABC transporter I family member 19-like	EC:3.6.1.3;EC:7.4.2.5;EC:3.6.1.15	K	AT1G03905.1	P-loop_containing_nucleoside_triphosphate_hydrolases_superfamily_protein
TEST	evm.model.Ug_unitig_578.621	signal recognition particle 54 kDa protein, chloroplastic	EC:3.6.1.15	U	AT5G03940.1	chloroplast_signal_recognition_particle_54_kDa_subunit
TEST	evm.model.Ug_unitig_578.616	DExH-box ATP-dependent RNA helicase DExH1 isoform X1	EC:3.6.1.3;EC:3.6.4.13;EC:3.6.1.15	A	AT2G35920.1	RNA_helicase_family_protein
TEST	evm.model.Ug_unitig_578.486	DEAD-box ATP-dependent RNA helicase 39	EC:3.6.1.3;EC:3.6.4.13;EC:3.6.1.15	A	AT4G09730.1	RH39
TEST	evm.model.Ug_unitig_578.331	DEA(D/H)-box RNA helicase family protein	EC:3.6.1.3;EC:3.6.4.13;EC:3.6.1.15	A	AT1G59990.2	DEA(D/H)-box_RNA_helicase_family_protein
TEST	evm.model.Ug_unitig_578.279	DNA mismatch repair	EC:3.6.1.3;EC:3.6.1.15	L	AT3G20475.1	MUTS-homologue_5
TEST	evm.model.Ug_unitig_578.270	Pentatricopeptide repeat-containing protein	EC:3.6.1.3;EC:3.6.1.15	S	AT2G41720.1	Tetratricopeptide_repeat_(TPR)-like_superfamily_protein
TEST	evm.model.Ug_unitig_578.247	GPN-loop GTPase 1	EC:3.6.1.15	L	AT4G21800.2	P-loop_containing_nucleoside_triphosphate_hydrolases_superfamily_protein
TEST	evm.model.Ug_unitig_578.244	Atp-dependent dna helicase 2 subunit ku70	EC:3.6.1.3;EC:3.6.4.12;EC:3.6.1.15	L	AT1G16970.1	ATP-dependent_DNA_helicase_2_subunit_Ku70-like_protein
TEST	evm.model.Ug_unitig_578.173	Kinesin-like protein	EC:3.6.1.3;EC:3.6.1.15	Z	AT3G43210.5	ATP_binding_microtubule_motor_family_protein
TEST	evm.model.Ug_unitig_578.172	Kinesin-like protein	EC:3.6.1.3;EC:3.6.1.15	Z	AT3G43210.5	ATP_binding_microtubule_motor_family_protein
TEST	evm.model.Ug_unitig_578.171	Kinesin-like protein	EC:3.6.1.3;EC:3.6.1.15	Z	AT3G43210.5	ATP_binding_microtubule_motor_family_protein
TEST	evm.model.Ug_unitig_578.37	Putative DNA helicase MCM8	EC:3.6.1.3;EC:3.6.1.15	L	AT3G09660.3	minichromosome_maintenance_8
TEST	evm.model.Ug_unitig_130.19	Regulator of rDNA transcription protein 15	EC:3.6.1.3;EC:3.2.1.24;EC:3.6.1.15	G	noTAIR	NULL
TEST	evm.model.Ug_unitig_92.193	ABC transporter G family member 8	EC:3.6.1.3;EC:7.5.2.2;EC:7.5.2.1;EC:3.6.1.15	Q	AT5G52860.1	ABC-2_type_transporter_family_protein
TEST	evm.model.Ug_unitig_92.160	primase homolog protein-like isoform X1	EC:3.6.1.3;EC:3.6.4.12;EC:3.6.1.15	L	AT1G30660.3	nucleic_acid_binding_protein
TEST	evm.model.Ug_unitig_92.154	Kinesin-like protein kin12b	EC:3.6.1.3;EC:3.6.1.15;EC:3.6.4.4	Z	AT3G23670.1	phragmoplast-associated_kinesin-related_protein
TEST	evm.model.Ug_unitig_90.17	Protein translocase subunit SecA	EC:3.6.1.3;EC:7.4.2.3;EC:7.4.2.4;EC:7.4.2.5;EC:3.6.1.15	C	AT4G01800.3	Albino_or_Glassy_Yellow_1
TEST	evm.model.Ug_unitig_90.16	Protein translocase subunit SecA	EC:3.6.1.3;EC:7.4.2.3;EC:7.4.2.4;EC:7.4.2.5;EC:3.6.1.15	C	AT4G01800.3	Albino_or_Glassy_Yellow_1
TEST	evm.model.Ug_unitig_90.15	ABC transporter B family member 21-like	EC:3.6.1.3;EC:7.6.2.2;EC:3.6.1.15	Q	AT3G62150.3	P-glycoprotein_21
TEST	evm.model.Ug_unitig_88.209	pleiotropic drug resistance protein 2-like	EC:3.6.1.3;EC:3.6.1.15;EC:7.2.2.16	Q	AT1G66950.1	pleiotropic_drug_resistance_11
TEST	evm.model.Ug_unitig_88.113	Dynein light chain	EC:3.6.1.3;EC:3.6.1.15;EC:3.6.4.4	Z	AT4G15930.1	Dynein_light_chain_type_1_family_protein
TEST	evm.model.Ug_unitig_88.58	Sulfoquinovosyl transferase SQD2	EC:3.6.1.15	IMO	AT5G01220.1	sulfoquinovosyldiacylglycerol_2
TEST	evm.model.Ug_unitig_88.20	Cation transport ATPase	EC:3.6.1.3;EC:7.2.2.10;EC:3.6.1.15	P	AT1G63440.1	heavy_metal_atpase_5
TEST	evm.model.Ug_unitig_88.5	Phospholipid-transporting ATPase	EC:3.6.1.3;EC:7.6.2.1;EC:3.6.1.15	P	AT1G17500.2	ATPase_E1-E2_type_family_protein_/_haloacid_dehalogenase-like_hydrolase_family_protein
TEST	evm.model.Ug_unitig_85.167	septum-promoting GTP-binding protein 1-like	EC:3.6.1.15	S	AT5G54840.1	Ras-related_small_GTP-binding_family_protein
TEST	evm.model.Ug_unitig_85.116	myosin-6-like isoform X1	EC:3.6.1.3;EC:3.6.1.15	Z	AT5G43900.1	myosin_2
TEST	evm.model.Ug_unitig_85.62	probable inactive ATP-dependent zinc metalloprotease FTSHI 2, chloroplastic	EC:3.4.24;EC:3.6.1.3;EC:3.6.1.15	O	AT3G16290.1	AAA-type_ATPase_family_protein
TEST	evm.model.Ug_unitig_85.60	Pleiotropic drug resistance protein 12	EC:3.6.1.3;EC:3.6.3.25;EC:7.3.2.3;EC:3.6.1.15	Q	AT1G15210.1	pleiotropic_drug_resistance_7
TEST	evm.model.Ug_unitig_85.33	DNA mismatch repair protein MSH6	EC:3.6.1.3;EC:3.6.1.15	L	AT4G02070.1	MUTS_homolog_6
TEST	evm.model.Ug_unitig_82.122	ribonuclease P protein subunit p25-like protein	EC:3.6.1.3;EC:3.6.1.15	S	AT1G76010.2	Alba_DNA/RNA-binding_protein
TEST	evm.model.Ug_unitig_62.813	Abc transporter b family member 25, mitochondrial	EC:7.2.2.2;EC:3.6.1.3;EC:7.6.2.2;EC:3.6.1.15	Q	AT5G58270.1	ABC_transporter_of_the_mitochondrion_3
TEST	evm.model.Ug_unitig_62.790	Putative ARM repeat superfamily protein	EC:3.6.1.15	S	AT3G06530.2	ARM_repeat_superfamily_protein
TEST	evm.model.Ug_unitig_62.680	Calcium-transporting ATPase, endoplasmic reticulum-type	EC:3.6.1.3;EC:7.1.2.1;EC:7.2.2.10;EC:3.6.1.15	P	AT4G00900.2	ER-type_Ca2+-ATPase_2
TEST	evm.model.Ug_unitig_62.673	protein TRIGALACTOSYLDIACYLGLYCEROL 3, chloroplastic	EC:3.6.1.3;EC:3.6.3.25;EC:7.3.2.3;EC:3.6.1.15	Q	AT1G65410.1	non-intrinsic_ABC_protein_11
TEST	evm.model.Ug_unitig_62.650	Protein ROOT HAIR DEFECTIVE 3 homolog	EC:3.6.1.15	S	AT3G13870.1	Root_hair_defective_3_GTP-binding_protein_(RHD3)
TEST	evm.model.Ug_unitig_62.647	Phospholipid-transporting ATPase	EC:3.6.1.3;EC:7.6.2.1;EC:3.6.1.15	P	AT1G54280.3	ATPase_E1-E2_type_family_protein_/_haloacid_dehalogenase-like_hydrolase_family_protein
TEST	evm.model.Ug_unitig_62.623	ABC transporter G family member 7	EC:3.6.1.3;EC:3.6.3.25;EC:7.3.2.3;EC:3.6.1.15	Q	AT2G01320.3	ABC-2_type_transporter_family_protein
TEST	evm.model.Ug_unitig_62.604	Phospholipid-transporting ATPase	EC:3.6.1.3;EC:7.6.2.1;EC:3.6.1.15	P	AT1G68710.2	ATPase_E1-E2_type_family_protein_/_haloacid_dehalogenase-like_hydrolase_family_protein
TEST	evm.model.Ug_unitig_62.549	GPN-loop GTPase 2	EC:3.6.1.15	S	AT5G22370.3	P-loop_containing_nucleoside_triphosphate_hydrolases_superfamily_protein
TEST	evm.model.Ug_unitig_62.502	regulator of telomere elongation helicase 1-like isoform X1	EC:3.6.1.3;EC:3.6.4.12;EC:3.6.1.15	L	AT1G79950.1	RAD3-like_DNA-binding_helicase_protein
TEST	evm.model.Ug_unitig_62.463	ABC transporter A family member 2	EC:3.6.1.3;EC:3.6.3.25;EC:7.3.2.3;EC:3.6.1.15	I	AT3G47730.1	ATP-binding_cassette_A2
TEST	evm.model.Ug_unitig_62.451	ras-related protein RABA5b-like	EC:3.6.1.15	U	AT3G07410.1	RAB_GTPase_homolog_A5B
TEST	evm.model.Ug_unitig_62.384	DNA helicase	EC:3.6.1.3;EC:3.6.1.15	L	AT2G07690.1	Minichromosome_maintenance_(MCM2/3/5)_family_protein
TEST	evm.model.Ug_unitig_62.378	rac-like GTP-binding protein ARAC7	EC:3.6.1.15	S	AT4G28950.1	RHO-related_protein_from_plants_9
TEST	evm.model.Ug_unitig_62.337	Calcium-transporting ATPase	EC:3.6.1.3;EC:7.2.2.10;EC:3.6.1.15	P	AT4G37640.1	calcium_ATPase_2
TEST	evm.model.Ug_unitig_62.331	Putative cadmium/zinc-transporting ATPase HMA1, chloroplastic	EC:3.6.1.3;EC:7.2.2.10;EC:3.6.1.15	P	AT4G37270.1	heavy_metal_atpase_1
TEST	evm.model.Ug_unitig_62.327	Kinesin-like protein	EC:3.6.1.3;EC:3.6.4.5;EC:3.6.1.15	Z	AT2G22610.2	Di-glucose_binding_protein_with_Kinesin_motor_domain-containing_protein
TEST	evm.model.Ug_unitig_62.326	Plasma membrane ATPase	EC:3.6.1.3;EC:7.1.2.1;EC:6.1.1.6;EC:3.6.1.15	P	AT2G24520.2	plasma_membrane_H+-ATPase
TEST	evm.model.Ug_unitig_62.236	ABC transporter G family member 26-like	EC:3.6.1.3;EC:7.4.2.1;EC:7.3.2.5;EC:3.6.1.15	Q	AT3G13220.1	ABC-2_type_transporter_family_protein
TEST	evm.model.Ug_unitig_62.106	GTP-binding protein TypA/BipA homolog	EC:3.6.1.15	J	AT2G31060.2	elongation_factor_family_protein
TEST	evm.model.Ug_unitig_61.319	protein MICRORCHIDIA 2-like	EC:3.6.1.3;EC:3.6.1.15	D	AT4G36290.1	compromized_recognition_of_TCV_1
TEST	evm.model.Ug_unitig_61.284	ABC transporter C family member 14-like	EC:3.6.1.3;EC:7.6.2.2;EC:3.6.1.15	Q	AT2G47800.1	multidrug_resistance-associated_protein_4
TEST	evm.model.Ug_unitig_61.283	ABC transporter C family member 14-like	EC:3.6.1.3;EC:7.6.2.2;EC:3.6.1.15	Q	AT2G47800.1	multidrug_resistance-associated_protein_4
TEST	evm.model.Ug_unitig_61.257	ABC transporter I family member 17	EC:3.6.1.3;EC:7.3.2.1;EC:3.6.1.15	Q	AT1G67940.1	non-intrinsic_ABC_protein_3
TEST	evm.model.Ug_unitig_61.255	Short integuments 2, mitochondrial	EC:3.6.1.15	S	AT2G41670.1	P-loop_containing_nucleoside_triphosphate_hydrolases_superfamily_protein
TEST	evm.model.Ug_unitig_61.189	DNA mismatch repair protein MSH2	EC:3.6.1.3;EC:3.6.1.15	L	AT3G18524.1	MUTS_homolog_2
TEST	evm.model.Ug_unitig_61.182	RNA helicase	EC:3.6.1.3;EC:3.6.4.13;EC:3.6.1.15	A	AT3G18600.1	P-loop_containing_nucleoside_triphosphate_hydrolases_superfamily_protein
TEST	evm.model.Ug_unitig_61.164	DNA repair protein RAD51 homolog 2	EC:3.6.1.3;EC:3.6.1.8;EC:3.6.1.19;EC:3.6.1.15	L	AT2G28560.6	DNA_repair_(Rad51)_family_protein
TEST	evm.model.Ug_unitig_61.89	Helicase SEN1	EC:3.6.1.3;EC:3.6.1.15	A	AT1G16800.1	P-loop_containing_nucleoside_triphosphate_hydrolases_superfamily_protein
TEST	evm.model.Ug_unitig_61.63	Dynamin-related protein 3B	EC:3.6.1.15	U	AT4G33650.2	dynamin-related_protein_3A
TEST	evm.model.Ug_unitig_61.20	ABC transporter I family member 10, chloroplastic	EC:3.6.1.3;EC:7.6.2.11;EC:3.6.1.15	Q	AT4G33460.1	ABC_transporter_family_protein
TEST	evm.model.Ug_unitig_60.340	DExH-box ATP-dependent RNA helicase DExH14 isoform X1	EC:3.6.1.3;EC:3.6.1.15	A	AT5G61140.2	U5_small_nuclear_ribonucleoprotein_helicase
TEST	evm.model.Ug_unitig_60.148	DEAD-box ATP-dependent RNA helicase 46	EC:3.6.1.3;EC:3.6.4.13;EC:3.6.1.15	A	AT3G06480.1	DEAD_box_RNA_helicase_family_protein
TEST	evm.model.Ug_unitig_60.58	Dynamin-related protein 3A-like	EC:3.6.1.15	U	AT2G14120.1	dynamin_related_protein
TEST	evm.model.Ug_unitig_60.57	dynamin-related protein 3A-like	EC:3.6.1.15	U	AT4G33650.2	dynamin-related_protein_3A
TEST	evm.model.Ug_unitig_60.17	Kinesin-like protein (Fragment)	EC:3.6.1.3;EC:3.6.1.15	Z	AT1G18410.1	P-loop_containing_nucleoside_triphosphate_hydrolases_superfamily_protein
TEST	evm.model.Ug_unitig_52.827	putative nitric oxide synthase isoform X1	EC:1.14.13.39;EC:1.14.13;EC:3.6.1.15	S	AT3G47450.2	P-loop_containing_nucleoside_triphosphate_hydrolases_superfamily_protein
TEST	evm.model.Ug_unitig_52.768	ATP-dependent DNA helicase At3g02060, chloroplastic	EC:3.6.1.3;EC:3.6.1.15	A	AT3G02060.3	DEAD/DEAH_box_helicase
TEST	evm.model.Ug_unitig_52.688	RuvB-like helicase	EC:3.6.1.3;EC:3.6.4.12;EC:3.6.1.15	L	AT5G67630.1	P-loop_containing_nucleoside_triphosphate_hydrolases_superfamily_protein
TEST	evm.model.Ug_unitig_52.648	Heat shock 70 kDa protein	EC:1.3.1.74;EC:3.6.1.3;EC:3.6.1.15	O	AT1G16030.1	heat_shock_protein_70B
TEST	evm.model.Ug_unitig_52.627	DEAD-box ATP-dependent RNA helicase 29	EC:3.6.1.3;EC:3.6.4.13;EC:3.6.1.15	A	AT1G77030.1	putative_DEAD-box_ATP-dependent_RNA_helicase_29
TEST	evm.model.Ug_unitig_52.590	ATP-dependent Clp protease proteolytic subunit	EC:3.4.21;EC:3.6.1.3;EC:3.6.1.15	O	AT1G12410.1	CLP_protease_proteolytic_subunit_2
TEST	evm.model.Ug_unitig_52.584	endoribonuclease Dicer homolog 1	EC:3.1.30;EC:3.6.1.3;EC:3.1.26;EC:3.1.26.3;EC:3.6.1.15	A	AT1G01040.1	dicer-like_1
TEST	evm.model.Ug_unitig_52.575	Protein microrchidia 6	EC:3.6.1.3;EC:3.6.1.15	D	AT1G19100.1	Histidine_kinase-%2C_DNA_gyrase_B-%2C_and_HSP90-like_ATPase_family_protein
TEST	evm.model.Ug_unitig_52.566	ABC transporter C family member 13	EC:1.3.1.74;EC:3.6.1.3;EC:3.6.1.15	Q	AT2G07680.3	multidrug_resistance-associated_protein_11
TEST	evm.model.Ug_unitig_52.481	DExH-box ATP-dependent RNA helicase DExH3	EC:3.6.1.3;EC:3.6.4.13;EC:3.6.1.15	A	AT5G04895.1	DEA(D/H)-box_RNA_helicase_family_protein
TEST	evm.model.Ug_unitig_52.472	ATP-dependent DNA helicase homolog RECG, chloroplastic-like	EC:3.6.1.3;EC:3.6.4.12;EC:3.6.4.13;EC:3.6.1.15	A	AT2G01440.1	DEAD/DEAH_box_RNA_helicase_family_protein
TEST	evm.model.Ug_unitig_52.392	Protein CHROMATIN REMODELING 19	EC:3.6.1.3;EC:3.6.1.15	B	AT2G02090.1	SNF2_domain-containing_protein_/_helicase_domain-containing_protein
TEST	evm.model.Ug_unitig_52.333	Spastin like	EC:3.6.1.3;EC:3.6.1.15	O	AT1G64110.4	P-loop_containing_nucleoside_triphosphate_hydrolases_superfamily_protein
TEST	evm.model.Ug_unitig_52.320	replication factor C subunit 2	EC:3.6.1.3;EC:2.7.7.7;EC:3.6.1.15	L	AT1G21690.1	ATPase_family_associated_with_various_cellular_activities_(AAA)
TEST	evm.model.Ug_unitig_46.736	Dna mismatch repair protein msh3	EC:3.6.1.3;EC:3.6.1.15	L	AT4G25540.1	homolog_of_DNA_mismatch_repair_protein_MSH3
TEST	evm.model.Ug_unitig_46.731	xyloglucan galactosyltransferase XLT2	EC:3.4.24;EC:3.6.1.3;EC:3.6.1.15	GMW	AT5G62220.1	glycosyltransferase_18
TEST	evm.model.Ug_unitig_46.697	SNF2 domain-containing protein CLASSY 1-like	EC:3.6.1.3;EC:3.6.1.15	L	AT5G20420.1	chromatin_remodeling_42
TEST	evm.model.Ug_unitig_46.670	eukaryotic peptide chain release factor GTP-binding subunit ERF3A-like isoform X1	EC:3.6.1.15	J	AT1G18070.2	Translation_elongation_factor_EF1A/initiation_factor_IF2gamma_family_protein
TEST	evm.model.Ug_unitig_46.585	ATP-dependent RNA helicase SUV3, mitochondrial isoform X2	EC:3.6.1.3;EC:3.6.4.12;EC:3.6.4.13;EC:3.6.1.15	A	AT4G14790.2	ATP-dependent_RNA_helicase
TEST	evm.model.Ug_unitig_46.576	ATPase ARSA1 isoform A	EC:3.6.3.16;EC:3.6.1.3;EC:3.6.1.15	P	AT3G10350.1	P-loop_containing_nucleoside_triphosphate_hydrolases_superfamily_protein
TEST	evm.model.Ug_unitig_46.534	Tubulin beta chain	EC:3.6.1.15	Z	AT5G23860.2	tubulin_beta_8
TEST	evm.model.Ug_unitig_46.502	DEAD-box ATP-dependent RNA helicase 36	EC:3.6.1.3;EC:3.6.4.13;EC:3.6.1.15	A	AT1G16280.1	RNA_helicase_36
TEST	evm.model.Ug_unitig_46.433	DNA-binding protein SMUBP-2	EC:3.6.1.3;EC:3.6.4.12;EC:3.6.4.13;EC:3.6.1.15	L	AT2G03270.1	DNA-binding_protein
TEST	evm.model.Ug_unitig_46.374	Extra-large guanine nucleotide-binding protein 3	EC:3.6.1.15	T	AT1G31930.6	extra-large_GTP-binding_protein_3
TEST	evm.model.Ug_unitig_46.343	Protein CHROMATIN REMODELING	EC:3.6.1.3;EC:3.6.1.15	KL	AT2G18760.7	chromatin_remodeling_8
TEST	evm.model.Ug_unitig_46.328	Nuclear/nucleolar GTPase 2	EC:3.6.1.15	S	AT1G52980.1	GTP-binding_family_protein
TEST	evm.model.Ug_unitig_46.312	Kinesin-like protein	EC:3.6.1.3;EC:3.6.1.15	Z	AT1G72250.2	Di-glucose_binding_protein_with_Kinesin_motor_domain-containing_protein
TEST	evm.model.Ug_unitig_46.244	GTP-binding nuclear protein	EC:3.6.1.15	U	AT5G55190.1	RAN_GTPase_3
TEST	evm.model.Ug_unitig_46.125	ribonuclease P protein subunit p25-like protein	EC:3.1.30;EC:3.6.1.3;EC:3.1.26;EC:3.1.26.5;EC:3.6.1.15	S	AT1G20220.1	Alba_DNA/RNA-binding_protein
TEST	evm.model.Ug_unitig_46.83	Dynamin-2A-like	EC:3.6.1.15	U	AT1G59610.1	dynamin-like_3
TEST	evm.model.Ug_unitig_46.17	Kinesin-like protein FRA1	EC:3.6.1.3;EC:3.6.1.15;EC:3.6.4.4	Z	AT5G47820.2	P-loop_containing_nucleoside_triphosphate_hydrolases_superfamily_protein
TEST	evm.model.Ug_unitig_46.3	DEAD-box ATP-dependent RNA helicase 56-like isoform X1	EC:3.6.1.3;EC:3.6.4.13;EC:3.6.1.15	A	AT5G11200.1	DEAD/DEAH_box_RNA_helicase_family_protein
TEST	evm.model.Ug_unitig_37.1037	DNA helicase	EC:3.6.1.3;EC:3.6.4.12;EC:3.6.1.15	L	AT5G44635.1	minichromosome_maintenance_(MCM2/3/5)_family_protein
TEST	evm.model.Ug_unitig_37.1004	Kinesin-like protein	EC:3.6.1.3;EC:3.6.1.15	Z	AT4G24170.2	ATP_binding_microtubule_motor_family_protein
TEST	evm.model.Ug_unitig_37.941	lactation elevated protein 1 isoform X2	EC:3.6.1.3;EC:3.6.1.15	S	AT2G25530.1	AFG1-like_ATPase_family_protein
TEST	evm.model.Ug_unitig_37.794	Plasma membrane ATPase	EC:3.6.1.3;EC:7.1.2.1;EC:3.6.1.15	P	AT4G30190.1	H[+]-ATPase_2
TEST	evm.model.Ug_unitig_37.742	DNA helicase INO80 isoform X2	EC:3.6.1.3;EC:3.6.1.15	L	AT3G57300.4	DNA_helicase_INO80-like_protein
TEST	evm.model.Ug_unitig_37.642	myosin-11 isoform X2	EC:3.6.1.15	Z	AT1G04160.2	myosin_XI_B
TEST	evm.model.Ug_unitig_37.489	myosin-11-like isoform X1	EC:3.6.1.3;EC:3.6.1.15	Z	AT1G54560.2	Myosin_family_protein_with_Dil_domain-containing_protein
TEST	evm.model.Ug_unitig_37.488	myosin-11-like isoform X1	EC:3.6.1.3;EC:3.6.1.15	Z	AT1G54560.1	Myosin_family_protein_with_Dil_domain-containing_protein
TEST	evm.model.Ug_unitig_37.446	Translocase of chloroplast 159, chloroplastic-like	EC:3.6.1.15	S	AT4G02510.4	translocon_at_the_outer_envelope_membrane_of_chloroplasts_159
TEST	evm.model.Ug_unitig_37.418	ATP-dependent DNA helicase DDM1-like isoform X2	EC:3.6.1.3;EC:3.6.4.12;EC:3.6.1.15	K	AT5G66750.1	chromatin_remodeling_1
TEST	evm.model.Ug_unitig_37.411	Translation factor GUF1 homolog, chloroplastic	EC:3.6.1.15	J	AT5G08650.1	Small_GTP-binding_protein
TEST	evm.model.Ug_unitig_37.370	ABC transporter G family member 24-like	EC:3.6.1.3;EC:3.6.1.15	Q	AT1G53390.1	P-loop_containing_nucleoside_triphosphate_hydrolases_superfamily_protein
TEST	evm.model.Ug_unitig_37.349	Protein CHROMATIN REMODELING 20	EC:3.6.1.3;EC:3.6.1.15	K	AT1G08600.4	P-loop_containing_nucleoside_triphosphate_hydrolases_superfamily_protein
TEST	evm.model.Ug_unitig_37.292	PDR protein 2	EC:3.6.1.3;EC:3.6.3.25;EC:7.3.2.3;EC:3.6.1.15	Q	AT2G26910.1	pleiotropic_drug_resistance_4
TEST	evm.model.Ug_unitig_37.288	helicase and polymerase-containing protein TEBICHI isoform X1	EC:3.6.1.3;EC:3.6.4.12;EC:2.7.7.7;EC:3.6.1.15	A	AT4G32700.2	MUS308_and_mammalian_DNA_polymerase-like_protein
TEST	evm.model.Ug_unitig_37.278	DNA repair protein recA homolog 1, chloroplastic-like isoform X1	EC:3.6.1.3;EC:3.6.1.8;EC:3.6.1.19;EC:3.6.1.15	L	AT1G79050.1	recA_DNA_recombination_family_protein
TEST	evm.model.Ug_unitig_37.214	probable inactive ATP-dependent zinc metalloprotease FTSHI 1, chloroplastic	EC:3.4.24;EC:3.6.1.3;EC:3.6.3.52;EC:7.4.2.5;EC:3.6.1.15	O	AT4G23940.1	FtsH_extracellular_protease_family
TEST	evm.model.Ug_unitig_37.197	Guanine nucleotide-binding protein alpha-1 subunit	EC:3.6.1.15	DT	AT2G26300.2	G_protein_alpha_subunit_1
TEST	evm.model.Ug_unitig_37.41	ABC transporter B family member 28 isoform X1	EC:3.6.1.3;EC:7.4.2.5;EC:3.6.1.15	Q	AT4G25450.1	non-intrinsic_ABC_protein_8
TEST	evm.model.Ug_unitig_32.1020	eukaryotic peptide chain release factor GTP-binding subunit ERF3A-like isoform X1	EC:3.6.1.15	J	AT1G18070.2	Translation_elongation_factor_EF1A/initiation_factor_IF2gamma_family_protein
TEST	evm.model.Ug_unitig_32.1006	Ribulose bisphosphate carboxylase/oxygenase activase 2, chloroplastic	EC:3.6.1.3;EC:3.6.1.15	O	AT2G39730.2	rubisco_activase
TEST	evm.model.Ug_unitig_32.939	ABC transporter I family member 1	EC:7.6.2.5;EC:3.6.1.3;EC:3.6.1.15	I	AT1G63270.1	non-intrinsic_ABC_protein_10
TEST	evm.model.Ug_unitig_32.909	meiotic recombination protein DMC1 homolog	EC:3.6.1.3;EC:3.6.1.15	L	AT3G22880.2	DNA_repair_(Rad51)_family_protein
TEST	evm.model.Ug_unitig_32.740	ABC transporter I family member 20	EC:3.6.1.3;EC:3.6.1.15	K	AT5G02270.1	non-intrinsic_ABC_protein_9
TEST	evm.model.Ug_unitig_32.722	CHD3-type chromatin-remodeling factor PICKLE	EC:3.6.1.3;EC:3.6.1.15	KL	AT2G25170.2	chromatin_remodeling_factor_CHD3_(PICKLE)
TEST	evm.model.Ug_unitig_32.699	Phospholipid-transporting ATPase	EC:3.6.1.3;EC:7.6.2.1;EC:3.6.1.15	P	AT5G44240.2	aminophospholipid_ATPase_2
TEST	evm.model.Ug_unitig_32.639	ras-related protein RABA5a-like	EC:3.6.1.15	S	noTAIR	NULL
TEST	evm.model.Ug_unitig_32.528	DEAD-box ATP-dependent RNA helicase 28	EC:3.6.1.3;EC:3.6.4.13;EC:3.6.1.15	A	AT4G16630.1	DEA(D/H)-box_RNA_helicase_family_protein
TEST	evm.model.Ug_unitig_32.469	Fanconi anemia group J protein homolog	EC:3.6.1.3;EC:3.6.4.12;EC:3.6.1.15	L	AT1G20720.2	RAD3-like_DNA-binding_helicase_protein
TEST	evm.model.Ug_unitig_32.467	ATP-dependent Clp protease proteolytic subunit	EC:3.4.21;EC:3.6.1.3;EC:3.6.1.15	O	AT1G09130.2	ATP-dependent_caseinolytic_(Clp)_protease/crotonase_family_protein
TEST	evm.model.Ug_unitig_32.386	ABC transporter D family member 2, chloroplastic	EC:3.6.1.3;EC:3.6.3.47;EC:3.6.1.15	I	AT1G54350.1	ABC_transporter_family_protein
TEST	evm.model.Ug_unitig_32.304	endonuclease MutS2	EC:3.6.1.3;EC:3.6.1.15	L	AT1G65070.2	DNA_mismatch_repair_protein_MutS%2C_type_2
TEST	evm.model.Ug_unitig_32.161	Increased DNA methylation 1 isoform B	EC:3.6.1.3;EC:3.6.1.15	S	AT4G14920.3	Acyl-CoA_N-acyltransferase_with_RING/FYVE/PHD-type_zinc_finger_protein
TEST	evm.model.Ug_unitig_32.120	ABC transporter F family member 4	EC:3.6.1.3;EC:7.3.2.2;EC:3.6.1.15	J	AT3G54540.2	general_control_non-repressible_4
TEST	evm.model.Ug_unitig_32.6	Dynein light chain	EC:3.6.1.3;EC:3.6.1.15;EC:3.6.4.4	Z	AT4G15930.1	Dynein_light_chain_type_1_family_protein
TEST	evm.model.Ug_unitig_30.1	1,4-alpha-glucan-branching enzyme 1, chloroplastic/amyloplastic	EC:3.6.1.3;EC:2.4.1.18;EC:3.6.1.15	G	AT5G03650.1	starch_branching_enzyme_2.2
TEST	evm.model.Ug_unitig_28.2	Elongation factor-like GTPase 1	EC:3.6.1.15	J	AT3G22980.3	Ribosomal_protein_S5/Elongation_factor_G/III/V_family_protein
TEST	evm.model.Ug_unitig_27.585	DEAD-box ATP-dependent RNA helicase 38	EC:3.6.1.3;EC:3.6.4.13;EC:3.6.1.15	A	AT3G53110.1	P-loop_containing_nucleoside_triphosphate_hydrolases_superfamily_protein
TEST	evm.model.Ug_unitig_27.578	Ras-related protein RABC2a	EC:3.6.1.15	U	AT5G03530.2	RAB_GTPase_homolog_C2A
TEST	evm.model.Ug_unitig_27.542	probable inactive ATP-dependent zinc metalloprotease FTSHI 4, chloroplastic	EC:3.4.24;EC:3.6.1.3;EC:3.6.3.52;EC:7.4.2.5;EC:3.6.1.15	O	AT5G64580.1	AAA-type_ATPase_family_protein
TEST	evm.model.Ug_unitig_27.520	Dynein light chain	EC:3.6.1.3;EC:3.6.1.15;EC:3.6.4.4	Z	AT1G23220.1	Dynein_light_chain_type_1_family_protein
TEST	evm.model.Ug_unitig_27.168	Putative helicase magatama 3	EC:3.6.1.3;EC:3.6.1.15	L	AT4G15570.3	P-loop_containing_nucleoside_triphosphate_hydrolases_superfamily_protein
TEST	evm.model.Ug_unitig_26.1635	Myosin-1 isoform A	EC:3.6.1.3;EC:3.6.1.15	Z	AT3G19960.5	myosin_1
TEST	evm.model.Ug_unitig_26.1535	DNA helicase	EC:3.6.1.3;EC:3.6.1.15	L	AT1G44900.1	minichromosome_maintenance_(MCM2/3/5)_family_protein
TEST	evm.model.Ug_unitig_26.1347	ABC transporter G family member 31	EC:3.6.1.3;EC:3.6.1.15;EC:7.2.2.16	Q	AT2G29940.1	pleiotropic_drug_resistance_3
TEST	evm.model.Ug_unitig_26.1346	Abc transporter g family member 31	EC:3.6.1.3;EC:3.6.1.15;EC:7.2.2.16	Q	AT2G29940.1	pleiotropic_drug_resistance_3
TEST	evm.model.Ug_unitig_26.1261	myosin-11 isoform X1	EC:3.6.1.15	Z	AT1G54560.2	Myosin_family_protein_with_Dil_domain-containing_protein
TEST	evm.model.Ug_unitig_26.1020	Kinesin-like protein	EC:3.6.1.3;EC:3.6.1.15	Z	AT1G59540.1	P-loop_containing_nucleoside_triphosphate_hydrolases_superfamily_protein
TEST	evm.model.Ug_unitig_26.1017	DNA mismatch repair protein MLH1 (Fragment)	EC:3.6.1.3;EC:3.6.1.15	L	AT4G09140.1	MUTL-homologue_1
TEST	evm.model.Ug_unitig_26.999	DExH-box ATP-dependent RNA helicase DExH12-like	EC:3.6.1.3;EC:3.6.4.13;EC:3.6.1.15	A	AT1G20960.2	U5_small_nuclear_ribonucleoprotein_helicase
TEST	evm.model.Ug_unitig_26.885	Spastin like	EC:3.6.1.3;EC:3.6.1.15;EC:3.6.4.3	O	AT2G45500.1	AAA-type_ATPase_family_protein
TEST	evm.model.Ug_unitig_26.866	replication factor C subunit 2	EC:3.6.1.3;EC:2.7.7.7;EC:3.6.1.15	L	AT1G63160.1	replication_factor_C_2
TEST	evm.model.Ug_unitig_26.863	Kinesin-like protein	EC:3.6.1.3;EC:3.6.1.15	Z	AT1G63640.2	P-loop_nucleoside_triphosphate_hydrolases_superfamily_protein_with_CH_(Calponin_Homology)_domain-containing_protein
TEST	evm.model.Ug_unitig_26.783	AAA+-type ATPase	EC:3.6.1.3;EC:3.6.1.15	O	AT3G19740.1	P-loop_containing_nucleoside_triphosphate_hydrolases_superfamily_protein
TEST	evm.model.Ug_unitig_26.744	Gtp-binding protein brassinazole insensitive pale green 2, chloroplastic	EC:3.6.1.15	S	AT4G10620.1	P-loop_containing_nucleoside_triphosphate_hydrolases_superfamily_protein
TEST	evm.model.Ug_unitig_26.729	Lon protease homolog, mitochondrial	EC:3.4.21;EC:3.6.1.3;EC:3.6.1.15	O	AT5G26860.1	lon_protease_1
TEST	evm.model.Ug_unitig_26.696	Dynamin-related protein 5A	EC:3.6.1.15	U	AT1G53140.1	Dynamin_related_protein_5A
TEST	evm.model.Ug_unitig_26.593	ATP-dependent DNA helicase	EC:3.6.1.3;EC:3.6.4.12;EC:3.6.1.15	L	AT4G35740.1	DEAD/DEAH_box_RNA_helicase_family_protein
TEST	evm.model.Ug_unitig_26.516	Tubulin alpha chain	EC:3.6.1.15	Z	AT5G19780.1	tubulin_alpha-5
TEST	evm.model.Ug_unitig_26.510	Kinesin-like protein	EC:3.6.1.3;EC:3.6.1.15	Z	AT1G01950.1	armadillo_repeat_kinesin_2
TEST	evm.model.Ug_unitig_26.260	protein PHOTOPERIOD-INDEPENDENT EARLY FLOWERING 1 isoform X1	EC:3.6.1.3;EC:3.6.1.15	KL	AT3G12810.1	SNF2_domain-containing_protein_/_helicase_domain-containing_protein
TEST	evm.model.Ug_unitig_26.245	Calcium-transporting ATPase	EC:3.6.1.3;EC:7.2.2.10;EC:3.6.1.15	P	AT3G57330.1	autoinhibited_Ca2+-ATPase_11
TEST	evm.model.Ug_unitig_26.243	kinesin-4 isoform X2	EC:3.6.1.3;EC:3.6.1.15	Z	AT3G10310.2	P-loop_nucleoside_triphosphate_hydrolases_superfamily_protein_with_CH_(Calponin_Homology)_domain-containing_protein
TEST	evm.model.Ug_unitig_26.224	DExH-box ATP-dependent RNA helicase DExH7, chloroplastic isoform X1	EC:3.6.1.3;EC:3.6.4.13;EC:3.6.1.15	A	AT1G58060.1	RNA_helicase_family_protein
TEST	evm.model.Ug_unitig_26.27	pachytene checkpoint protein 2 homolog	EC:3.6.1.3;EC:3.6.1.15;EC:3.6.4.3	O	AT4G24710.3	pachytene_checkpoint-like_protein
TEST	evm.model.Ug_unitig_22.1578	Mitochondrial Rho GTPase	EC:3.6.1.15	V	AT5G27540.2	MIRO-related_GTP-ase_1
TEST	evm.model.Ug_unitig_22.1482	DEAD-box ATP-dependent RNA helicase 8	EC:3.6.1.3;EC:3.6.4.13;EC:3.6.1.15	A	AT4G00660.2	RNAhelicase-like_8
TEST	evm.model.Ug_unitig_22.1457	GTPase HflX-like	EC:3.6.1.15	S	AT5G57960.1	GTP-binding_protein%2C_HflX
TEST	evm.model.Ug_unitig_22.1422	Protein translocase subunit SecA	EC:3.6.1.3;EC:7.4.2.3;EC:7.4.2.4;EC:7.4.2.5;EC:3.6.1.15	F	AT1G21650.2	Preprotein_translocase_SecA_family_protein
TEST	evm.model.Ug_unitig_22.1375	Dar gtpase 2, mitochondrial	EC:3.6.1.15	S	AT4G10650.1	P-loop_containing_nucleoside_triphosphate_hydrolases_superfamily_protein
TEST	evm.model.Ug_unitig_22.1307	Protein CfxQ like	EC:3.6.1.3;EC:3.6.1.15	O	AT3G24530.1	AAA-type_ATPase_family_protein_/_ankyrin_repeat_family_protein
TEST	evm.model.Ug_unitig_22.1251	DNA helicase	EC:3.6.1.3;EC:3.6.4.12;EC:3.6.1.15	L	AT2G16440.1	Minichromosome_maintenance_(MCM2/3/5)_family_protein
TEST	evm.model.Ug_unitig_22.1207	Putative apyrase 6	EC:3.6.1.5;EC:3.6.1.15;EC:3.6.1.6	F	AT2G02970.1	GDA1/CD39_nucleoside_phosphatase_family_protein
TEST	evm.model.Ug_unitig_22.1178	Dexh-box atp-dependent rna helicase dexh15 chloroplastic	EC:3.6.1.3;EC:3.6.4.13;EC:3.6.1.15	A	AT1G70070.1	DEAD/DEAH_box_helicase
TEST	evm.model.Ug_unitig_22.1122	ATP-dependent DNA helicase Q-like 5	EC:3.6.1.3;EC:3.6.4.12;EC:3.6.1.15	A	AT1G27880.1	DEAD/DEAH_box_RNA_helicase_family_protein
TEST	evm.model.Ug_unitig_22.1071	myosin-1-like isoform X1	EC:3.6.1.3;EC:3.6.1.15	Z	AT3G19960.5	myosin_1
TEST	evm.model.Ug_unitig_22.1027	Abc transporter c family member 5	EC:3.6.1.3;EC:7.6.2.2;EC:3.6.1.15	Q	AT1G04120.1	multidrug_resistance-associated_protein_5
TEST	evm.model.Ug_unitig_22.1006	ABC transporter I family member 17	EC:3.6.1.3;EC:7.3.2.1;EC:3.6.1.15	Q	AT1G67940.1	non-intrinsic_ABC_protein_3
TEST	evm.model.Ug_unitig_22.954	Adaptin ear-binding coat-associated protein 1	EC:3.6.1.3;EC:3.6.1.15	S	AT3G58600.1	Adaptin_ear-binding_coat-associated_protein_1_NECAP-1
TEST	evm.model.Ug_unitig_22.930	GDP-mannose transporter GONST1-like isoform X2	EC:3.6.1.3;EC:3.6.1.15	GOU	AT2G13650.3	golgi_nucleotide_sugar_transporter_1
TEST	evm.model.Ug_unitig_22.909	Phragmoplast orienting kinesin 2	EC:3.6.1.3;EC:3.6.1.15	Z	AT3G44050.1	P-loop_containing_nucleoside_triphosphate_hydrolases_superfamily_protein
TEST	evm.model.Ug_unitig_22.826	DNA repair protein recA-like protein 2, mitochondrial	EC:3.6.1.3;EC:3.6.1.8;EC:3.6.1.19;EC:3.6.1.15	L	AT3G10140.1	RECA_homolog_3
TEST	evm.model.Ug_unitig_22.614	AAA+-type ATPase	EC:3.6.1.3;EC:3.6.1.15;EC:3.6.4.3	O	AT1G02890.1	AAA-type_ATPase_family_protein
TEST	evm.model.Ug_unitig_22.552	Translation initiation factor 2 (Fragment)	EC:3.6.1.15	J	AT4G11160.2	Translation_initiation_factor_2%2C_small_GTP-binding_protein
TEST	evm.model.Ug_unitig_22.491	Dynamin-related protein 1c	EC:3.6.1.15	U	AT1G14830.1	DYNAMIN-like_1C
TEST	evm.model.Ug_unitig_22.427	Phospholipid-transporting ATPase	EC:3.6.1.3;EC:7.6.2.1;EC:3.6.1.15	P	AT1G59820.1	aminophospholipid_ATPase_3
TEST	evm.model.Ug_unitig_22.388	Regulator of nonsense transcripts 1-like protein	EC:3.6.1.3;EC:3.6.1.15	A	AT5G47010.1	RNA_helicase
TEST	evm.model.Ug_unitig_22.385	Replication factor c subunit 3	EC:3.6.1.3;EC:3.6.1.15	L	AT1G77470.1	replication_factor_C_subunit_3
TEST	evm.model.Ug_unitig_22.316	Gtp-binding protein brassinazole insensitive pale green 2, chloroplastic	EC:1.14.13.39;EC:1.14.13;EC:3.6.1.15	S	AT3G57180.1	P-loop_containing_nucleoside_triphosphate_hydrolases_superfamily_protein
TEST	evm.model.Ug_unitig_22.180	guanylate-binding protein 4-like	EC:3.6.1.15	S	AT2G38840.1	Guanylate-binding_family_protein
TEST	evm.model.Ug_unitig_22.151	Dexh-box atp-dependent rna helicase dexh8	EC:3.6.1.3;EC:3.6.4.13;EC:3.6.1.15	A	AT2G47680.1	zinc_finger_(CCCH_type)_helicase_family_protein
TEST	evm.model.Ug_unitig_22.142	ATP-dependent RNA helicase DEAH13	EC:3.6.1.3;EC:3.6.4.13;EC:3.6.1.15	A	AT1G33390.2	RNA_helicase_family_protein
TEST	evm.model.Ug_unitig_22.141	ATP-dependent RNA helicase DEAH13-like	EC:3.6.1.3;EC:3.6.4.13;EC:3.6.1.15	AJ	AT1G33390.2	RNA_helicase_family_protein
TEST	evm.model.Ug_unitig_22.88	26S proteasome regulatory complex, ATPase RPT4	EC:3.6.1.3;EC:3.6.1.15;EC:3.6.4.3	O	AT5G43010.1	regulatory_particle_triple-A_ATPase_4A
TEST	evm.model.Ug_unitig_22.29	Replication protein A subunit	EC:3.6.1.3;EC:3.6.1.15	L	AT2G06510.1	replication_protein_A_1A
TEST	evm.model.Ug_unitig_22.26	ABC transporter B family member 1	EC:3.6.1.3;EC:7.6.2.2;EC:7.2.2.7;EC:3.6.1.15	Q	AT2G36910.1	ATP_binding_cassette_subfamily_B1
TEST	evm.model.Ug_unitig_22.22	putative white-brown complex homolog protein 30	EC:3.6.1.3;EC:3.6.3.25;EC:7.3.2.3;EC:3.6.1.15	Q	AT2G37010.2	non-intrinsic_ABC_protein_12
TEST	evm.model.Ug_unitig_21.906	Kinesin-like protein	EC:3.6.1.3;EC:3.6.1.15	Z	AT5G02370.1	ATP_binding_microtubule_motor_family_protein
TEST	evm.model.Ug_unitig_21.816	Kinesin-like protein	EC:3.6.1.3;EC:3.6.1.15	Z	AT3G10180.1	P-loop_containing_nucleoside_triphosphate_hydrolases_superfamily_protein
TEST	evm.model.Ug_unitig_21.798	probable inactive ATP-dependent zinc metalloprotease FTSHI 5, chloroplastic isoform X1	EC:3.4.21;EC:3.4.24;EC:3.6.1.3;EC:3.6.3.52;EC:7.4.2.5;EC:3.6.1.15	O	AT3G04340.1	FtsH_extracellular_protease_family
TEST	evm.model.Ug_unitig_21.708	protein CHROMATIN REMODELING 35-like isoform X2	EC:3.6.1.3;EC:3.6.1.15	A	AT2G16390.1	SNF2_domain-containing_protein_/_helicase_domain-containing_protein
TEST	evm.model.Ug_unitig_21.678	Extra-large guanine nucleotide-binding protein 1-like	EC:3.6.1.15	DT	AT2G23460.1	extra-large_G-protein_1
TEST	evm.model.Ug_unitig_21.593	Calmodulin-interacting protein	EC:3.6.1.3;EC:3.6.1.15	O	AT3G56690.1	Cam_interacting_protein_111
TEST	evm.model.Ug_unitig_21.557	Obg-like ATPase 1	EC:3.6.1.3;EC:3.6.1.15	J	AT1G30580.1	GTP_binding_protein
TEST	evm.model.Ug_unitig_21.555	DNA helicase	EC:3.6.1.3;EC:3.6.1.15	L	AT5G46280.1	Minichromosome_maintenance_(MCM2/3/5)_family_protein
TEST	evm.model.Ug_unitig_21.530	Annexin	EC:3.6.1.3;EC:3.6.1.15;EC:1.11.1.7	U	AT1G35720.1	annexin_1
TEST	evm.model.Ug_unitig_21.523	eukaryotic translation initiation factor 5B-like	EC:3.6.1.15	J	AT1G76810.1	eukaryotic_translation_initiation_factor_2_(eIF-2)_family_protein
TEST	evm.model.Ug_unitig_21.432	DEAD-box ATP-dependent RNA helicase 47, mitochondrial	EC:3.6.1.3;EC:3.6.4.13;EC:3.6.1.15	J	AT1G12770.2	P-loop_containing_nucleoside_triphosphate_hydrolases_superfamily_protein
TEST	evm.model.Ug_unitig_21.380	HBS1-like protein isoform X2	EC:3.6.1.15	J	AT5G10630.1	Translation_elongation_factor_EF1A/initiation_factor_IF2gamma_family_protein
TEST	evm.model.Ug_unitig_21.305	probable DEAD-box ATP-dependent RNA helicase 48	EC:3.6.1.3;EC:3.6.4.13;EC:3.6.1.15	A	AT2G07750.1	DEA(D/H)-box_RNA_helicase_family_protein
TEST	evm.model.Ug_unitig_21.246	DAR GTPase 3, chloroplastic-like	EC:3.6.1.15	S	AT4G02790.1	GTP-binding_family_protein
TEST	evm.model.Ug_unitig_21.232	intron-binding protein aquarius	EC:3.6.1.3;EC:3.6.1.15	L	AT2G38770.1	P-loop_containing_nucleoside_triphosphate_hydrolases_superfamily_protein
TEST	evm.model.Ug_unitig_21.228	kinesin-like protein KIN12A	EC:3.6.1.3;EC:3.6.1.15;EC:3.6.4.4	Z	AT3G20150.1	Kinesin_motor_family_protein
TEST	evm.model.Ug_unitig_21.203	ras-related protein RABB1c	EC:3.6.1.15	U	AT4G17170.1	RAB_GTPase_homolog_B1C
TEST	evm.model.Ug_unitig_21.69	ABC transporter G family member 9-like	EC:3.6.1.3;EC:7.6.2.11;EC:3.6.1.15	Q	AT4G27420.1	ABC-2_type_transporter_family_protein
TEST	evm.model.Ug_unitig_21.51	ATP-dependent RNA helicase	EC:3.6.1.3;EC:3.6.4.13;EC:3.6.1.15	A	AT3G26560.1	ATP-dependent_RNA_helicase
TEST	evm.model.Ug_unitig_21.28	Kinesin-like protein	EC:3.6.1.3;EC:3.6.4.5;EC:3.6.1.15	Z	AT5G27000.1	kinesin_4
TEST	evm.model.Ug_unitig_21.23	Kinesin-like protein	EC:3.6.1.3;EC:3.6.1.15	Z	AT2G21300.5	ATP_binding_microtubule_motor_family_protein
TEST	evm.model.Ug_unitig_21.1	DEAD-box ATP-dependent RNA helicase 50	EC:3.6.1.3;EC:3.6.4.13;EC:3.6.1.15	A	AT3G06980.1	DEA(D/H)-box_RNA_helicase_family_protein
TEST	evm.model.Ug_unitig_8.1859	Kinesin-like protein	EC:3.6.1.3;EC:3.6.1.15;EC:3.6.4.4	Z	noTAIR	NULL
TEST	evm.model.Ug_unitig_8.1823	dynamin-related protein 5A	EC:3.6.1.15	U	AT5G42080.4	dynamin-like_protein
TEST	evm.model.Ug_unitig_8.1809	ABC transporter G family member 22	EC:3.6.1.3;EC:3.6.1.15	Q	AT5G06530.2	ABC-2_type_transporter_family_protein
TEST	evm.model.Ug_unitig_8.1778	Tubulin gamma chain	EC:3.6.1.15	Z	AT3G61650.1	gamma-tubulin
TEST	evm.model.Ug_unitig_8.1726	katanin p60 ATPase-containing subunit A-like 2 isoform X1	EC:3.6.1.3;EC:3.6.1.15;EC:3.6.4.3	O	AT2G34560.2	P-loop_containing_nucleoside_triphosphate_hydrolases_superfamily_protein
TEST	evm.model.Ug_unitig_8.1627	elongation factor 2	EC:3.6.1.15	J	AT1G56070.3	Ribosomal_protein_S5/Elongation_factor_G/III/V_family_protein
TEST	evm.model.Ug_unitig_8.1532	GTPase Rab5/YPT51	EC:3.6.1.15	U	AT3G54840.1	Ras-related_small_GTP-binding_family_protein
TEST	evm.model.Ug_unitig_8.1469	RNA helicase	EC:3.6.1.3;EC:3.6.4.13;EC:3.6.1.15	A	AT5G54910.1	DEA(D/H)-box_RNA_helicase_family_protein
TEST	evm.model.Ug_unitig_8.1465	GTP-binding protein TypA/BipA homolog	EC:3.6.1.15	J	AT5G13650.1	elongation_factor_family_protein
TEST	evm.model.Ug_unitig_8.1427	ATP-dependent DNA helicase Q-like 4A isoform X1	EC:3.6.1.3;EC:3.6.4.12;EC:3.6.1.15	A	AT1G10930.1	DNA_helicase_(RECQl4A)
TEST	evm.model.Ug_unitig_8.1351	DNA repair protein RAD51 homolog	EC:3.6.1.3;EC:3.6.1.15	L	AT5G20850.1	RAS_associated_with_diabetes_protein_51
TEST	evm.model.Ug_unitig_8.1274	Cell division protein FtsZ	EC:3.6.1.15	D	AT3G52750.3	Tubulin/FtsZ_family_protein
TEST	evm.model.Ug_unitig_8.1254	RNA helicase	EC:3.6.1.3;EC:3.6.4.13;EC:3.6.1.15	A	AT2G40700.1	P-loop_containing_nucleoside_triphosphate_hydrolases_superfamily_protein
TEST	evm.model.Ug_unitig_8.938	DNA replication ATP-dependent helicase/nuclease DNA2	EC:3.1.30;EC:3.6.1.3;EC:3.1.21;EC:3.6.4.12;EC:3.6.1.15	L	AT1G08840.3	DNA_replication_helicase
TEST	evm.model.Ug_unitig_8.861	Abc transporter g family member 11	EC:3.6.1.3;EC:3.6.3.25;EC:7.3.2.2;EC:7.3.2.3;EC:3.6.1.15	Q	AT1G17840.1	white-brown_complex-like_protein
TEST	evm.model.Ug_unitig_8.852	Guanine nucleotide-binding protein-like nsn1	EC:3.6.1.15	S	AT3G07050.1	GTP-binding_family_protein
TEST	evm.model.Ug_unitig_8.835	Adaptin ear-binding coat-associated protein 1 NECAP-1 protein	EC:3.6.1.3;EC:3.6.1.15	S	AT1G03900.1	non-intrinsic_ABC_protein_4
TEST	evm.model.Ug_unitig_8.823	Mitochondrial Rho GTPase	EC:3.6.1.15	V	AT3G63150.1	MIRO-related_GTP-ase_2
TEST	evm.model.Ug_unitig_8.796	ATP-dependent zinc metalloprotease FTSH 9, chloroplastic-like	EC:3.4.24;EC:3.6.1.3;EC:3.6.1.15	O	AT5G58870.1	FTSH_protease_9
TEST	evm.model.Ug_unitig_8.762	K+ transport growth defect-like protein	EC:3.6.1.3;EC:3.6.1.15;EC:3.6.4.3	O	AT2G27600.1	AAA-type_ATPase_family_protein
TEST	evm.model.Ug_unitig_8.736	SWI/SNF-related matrix-associated actin-dependent regulator of chromatin subfamily A-like protein 1 isoform X1	EC:3.6.1.3;EC:3.6.1.15	B	AT1G48310.1	chromatin_remodeling_factor18
TEST	evm.model.Ug_unitig_8.670	Ras-related protein Rab7	EC:3.6.1.15	U	AT3G18820.1	RAB_GTPase_homolog_G3F
TEST	evm.model.Ug_unitig_8.608	ABC transporter A family member 1	EC:3.6.1.3;EC:3.6.1.15	I	AT2G41700.1	ATP-binding_cassette_A1
TEST	evm.model.Ug_unitig_8.607	Abc transporter a family member 1	EC:3.6.1.3;EC:3.6.3.25;EC:7.3.2.3;EC:3.6.1.15	I	AT2G41700.1	ATP-binding_cassette_A1
TEST	evm.model.Ug_unitig_8.561	DEAD-box ATP-dependent RNA helicase 21	EC:3.6.1.3;EC:3.6.4.13;EC:3.6.1.15	A	AT2G33730.1	P-loop_containing_nucleoside_triphosphate_hydrolases_superfamily_protein
TEST	evm.model.Ug_unitig_8.430	V-type proton ATPase subunit a	EC:3.6.1.3;EC:7.1.2.1;EC:3.6.1.15	P	AT2G28520.1	vacuolar_proton_ATPase_A1
TEST	evm.model.Ug_unitig_8.429	V-type proton ATPase subunit a	EC:3.6.1.3;EC:7.1.2.1;EC:3.6.1.15	P	AT2G28520.1	vacuolar_proton_ATPase_A1
TEST	evm.model.Ug_unitig_8.171	Chaperone protein clpd, chloroplastic	EC:3.6.1.3;EC:3.6.1.15	O	AT5G51070.1	Clp_ATPase
TEST	evm.model.Ug_unitig_8.76	Molecular chaperones mortalin/PBP74/GRP75, HSP70 superfamily	EC:3.6.1.3;EC:3.6.1.15	O	AT5G49910.1	chloroplast_heat_shock_protein_70-2
TEST	evm.model.Ug_unitig_8.61	ABC transporter B family member 26, chloroplastic	EC:3.6.1.3;EC:7.4.2.5;EC:3.6.1.15	U	AT1G70610.1	transporter_associated_with_antigen_processing_protein_1
TEST	evm.model.Ug_unitig_0.2435	Cell division protein FtsY-like protein, chloroplastic	EC:3.6.1.15	U	AT2G45770.1	signal_recognition_particle_receptor_protein%2C_chloroplast_(FTSY)
TEST	evm.model.Ug_unitig_0.2377	Putative ATPase	EC:3.6.1.3;EC:3.6.1.15;EC:2.7.1.1	S	AT4G28070.2	AFG1-like_ATPase_family_protein
TEST	evm.model.Ug_unitig_0.2313	septum-promoting GTP-binding protein 1	EC:3.6.1.15	S	AT3G21700.3	Ras-related_small_GTP-binding_family_protein
TEST	evm.model.Ug_unitig_0.2287	eukaryotic translation initiation factor 2 subunit gamma-like	EC:3.6.1.15	J	AT1G04170.2	eukaryotic_translation_initiation_factor_2_gamma_subunit
TEST	evm.model.Ug_unitig_0.2234	ABC transporter A family member 7	EC:3.6.1.3;EC:3.6.3.25;EC:7.3.2.3;EC:3.6.1.15	Q	AT3G47790.1	ABC2_homolog_7
TEST	evm.model.Ug_unitig_0.2132	DNA-binding protein SMUBP-2-like	EC:3.6.1.3;EC:3.6.4.12;EC:3.6.4.13;EC:3.6.1.15	L	AT5G35970.1	P-loop_containing_nucleoside_triphosphate_hydrolases_superfamily_protein
TEST	evm.model.Ug_unitig_0.2063	Kinesin-like protein	EC:3.6.1.3;EC:3.6.1.15	Z	AT2G21300.5	ATP_binding_microtubule_motor_family_protein
TEST	evm.model.Ug_unitig_0.1910	Putative apyrase 7	EC:3.6.1.15;EC:3.6.1.6	F	AT4G19180.3	GDA1/CD39_nucleoside_phosphatase_family_protein
TEST	evm.model.Ug_unitig_0.1872	ATPase family AAA domain-containing protein	EC:3.6.1.3;EC:3.6.1.15	O	AT1G05910.1	cell_division_cycle_protein_48-related_/_CDC48-like_protein
TEST	evm.model.Ug_unitig_0.1814	ras-related protein Rab7	EC:3.6.1.15	U	AT4G09720.1	RAB_GTPase_homolog_G3A
TEST	evm.model.Ug_unitig_0.1812	Mitochondrial GTPase	EC:3.6.1.15	J	AT1G78010.1	tRNA_modification_GTPase
TEST	evm.model.Ug_unitig_0.1769	ABC transporter G family member 6-like	EC:3.6.1.3;EC:7.3.2.2;EC:3.6.1.15	Q	AT5G13580.1	ABC-2_type_transporter_family_protein
TEST	evm.model.Ug_unitig_0.1752	Putative ATP-dependent Clp-type protease (AAA+ ATPase superfamily)	EC:3.6.1.3;EC:3.6.1.15	O	AT5G53350.1	CLP_protease_regulatory_subunit_X
TEST	evm.model.Ug_unitig_0.1702	ABC transporter I family member 11, chloroplastic	EC:3.6.1.3;EC:3.6.3.25;EC:7.3.2.3;EC:3.6.1.15	Q	AT5G14100.1	non-intrinsic_ABC_protein_14
TEST	evm.model.Ug_unitig_0.1674	Abc transporter g family member 11	EC:3.6.1.3;EC:7.3.2.2;EC:3.6.1.15	Q	AT1G17840.1	white-brown_complex-like_protein
TEST	evm.model.Ug_unitig_0.1673	ABC transporter G family member 11	EC:3.6.1.3;EC:7.3.2.2;EC:7.6.2.7;EC:3.6.1.15	Q	AT3G21090.1	ABC-2_type_transporter_family_protein
TEST	evm.model.Ug_unitig_0.1631	pentatricopeptide repeat-containing protein At1g02060, chloroplastic-like	EC:3.6.1.3;EC:3.6.4.12;EC:3.6.1.15	K	AT1G02060.1	Tetratricopeptide_repeat_(TPR)-like_superfamily_protein
TEST	evm.model.Ug_unitig_0.1513	Helicase, C-terminal	EC:3.6.1.3;EC:3.6.1.15	L	AT2G40770.3	RING-finger%2C_DEAD-like_helicase%2C_PHD_and_SNF2_domain-containing_protein
TEST	evm.model.Ug_unitig_0.1341	Sulfoquinovosyl transferase SQD2	EC:3.6.1.15	IMO	AT5G01220.1	sulfoquinovosyldiacylglycerol_2
TEST	evm.model.Ug_unitig_0.1221	Elongation factor G, mitochondrial	EC:3.6.1.15	J	AT2G45030.1	Translation_elongation_factor_EFG/EF2_protein
TEST	evm.model.Ug_unitig_0.1204	DNA repair protein RAD51 homolog 3-like isoform X1	EC:3.6.1.3;EC:3.6.1.8;EC:3.6.1.19;EC:3.6.1.15	L	AT2G45280.1	RAS_associated_with_diabetes_protein_51C
TEST	evm.model.Ug_unitig_0.1096	Peroxisome biogenesis protein 6	EC:3.6.1.3;EC:3.6.1.15	O	AT1G03000.1	peroxin_6
TEST	evm.model.Ug_unitig_0.1089	DNA mismatch repair protein	EC:3.6.1.3;EC:3.6.1.15	L	AT4G02460.1	DNA_mismatch_repair_protein
TEST	evm.model.Ug_unitig_0.1078	Kinesin-like protein KIN-14I	EC:3.6.1.3;EC:3.6.4.5;EC:3.6.1.15	Z	AT2G47500.2	P-loop_nucleoside_triphosphate_hydrolases_superfamily_protein_with_CH_(Calponin_Homology)_domain-containing_protein
TEST	evm.model.Ug_unitig_0.1077	DEAD-box ATP-dependent RNA helicase	EC:3.6.1.3;EC:3.6.4.13;EC:3.6.1.15	A	AT5G62190.1	DEAD_box_RNA_helicase_(PRH75)
TEST	evm.model.Ug_unitig_0.962	ATP-dependent Clp protease proteolytic subunit	EC:3.4.21;EC:3.6.1.3;EC:3.6.1.15	O	AT4G17040.1	CLP_protease_R_subunit_4
TEST	evm.model.Ug_unitig_0.946	kinesin-like protein KIN-5D	EC:3.6.1.3;EC:3.6.1.15;EC:3.6.4.4	Z	AT3G45850.2	P-loop_containing_nucleoside_triphosphate_hydrolases_superfamily_protein
TEST	evm.model.Ug_unitig_0.939	DNA repair protein RAD51 homolog 4 isoform X1	EC:3.6.1.3;EC:3.6.1.15	L	AT1G07745.1	DNA_repair_RAD51-like_protein
TEST	evm.model.Ug_unitig_0.827	Calcium-transporting ATPase	EC:3.6.1.3;EC:7.2.2.10;EC:3.6.1.15	P	AT5G57110.3	autoinhibited_Ca2+_-ATPase%2C_isoform_8
TEST	evm.model.Ug_unitig_0.738	Dexh-box atp-dependent rna helicase dexh11	EC:3.6.1.3;EC:3.6.4.13;EC:3.6.1.15	A	AT3G46960.1	RNA_helicase%2C_ATP-dependent%2C_SK12/DOB1_protein
TEST	evm.model.Ug_unitig_0.729	Elongation factor Tu	EC:2.7.11;EC:3.6.1.15	J	AT4G20360.2	RAB_GTPase_homolog_E1B
TEST	evm.model.Ug_unitig_0.703	ATPase	EC:3.6.1.3;EC:3.6.1.15	P	AT1G01910.4	P-loop_containing_nucleoside_triphosphate_hydrolases_superfamily_protein
TEST	evm.model.Ug_unitig_0.696	pleiotropic drug resistance protein 2-like	EC:3.6.1.3;EC:3.6.1.15;EC:7.2.2.16	Q	AT2G36380.1	pleiotropic_drug_resistance_6
TEST	evm.model.Ug_unitig_0.685	putative pentatricopeptide repeat-containing protein At3g08820	EC:3.6.1.3;EC:3.6.1.15;EC:3.6.4.3	S	AT3G08820.1	Pentatricopeptide_repeat_(PPR)_superfamily_protein
TEST	evm.model.Ug_unitig_0.631	DEAD-box ATP-dependent RNA helicase 57	EC:3.6.1.3;EC:3.6.4.13;EC:3.6.1.15	A	AT3G09720.2	P-loop_containing_nucleoside_triphosphate_hydrolases_superfamily_protein
TEST	evm.model.Ug_unitig_0.596	Translocase of chloroplast 159, chloroplastic-like	EC:3.6.1.15	S	AT4G02510.4	translocon_at_the_outer_envelope_membrane_of_chloroplasts_159
TEST	evm.model.Ug_unitig_0.559	probable DNA helicase MCM9	EC:3.6.1.3;EC:3.6.1.15	L	AT2G14050.1	minichromosome_maintenance_9
TEST	evm.model.Ug_unitig_0.521	DNA repair protein XRCC3 homolog	EC:3.1.31;EC:3.6.1.3;EC:3.1.22;EC:3.6.1.15;EC:3.1.22.4	L	AT5G57450.2	homolog_of_X-ray_repair_cross_complementing_3_(XRCC3)
TEST	evm.model.Ug_unitig_0.486	Triphosphate tunel metalloenzyme 3	EC:3.6.1.25;EC:3.6.1.3;EC:3.6.1.15	S	AT2G11890.1	adenylate_cyclase
TEST	evm.model.Ug_unitig_0.481	ABC transporter B family member 15-like	EC:3.6.1.3;EC:7.6.2.2;EC:3.6.1.15	Q	AT3G28345.1	ABC_transporter_family_protein
TEST	evm.model.Ug_unitig_0.477	ATPase family AAA domain-containing protein 3C-like	EC:3.6.1.3;EC:3.6.1.15;EC:3.6.4.3	O	AT2G18330.1	AAA-type_ATPase_family_protein
TEST	evm.model.Ug_unitig_0.470	Kinesin-like protein	EC:3.6.1.3;EC:3.6.1.15;EC:3.6.4.4	Z	AT3G12020.4	P-loop_containing_nucleoside_triphosphate_hydrolases_superfamily_protein
TEST	evm.model.Ug_unitig_0.462	signal recognition particle receptor subunit alpha-like	EC:3.6.1.15	U	AT4G30600.2	signal_recognition_particle_receptor_alpha_subunit_family_protein
TEST	evm.model.Ug_unitig_0.431	ATP-dependent RNA helicase	EC:3.6.1.3;EC:3.6.1.15	none	AT5G09960.1	sorbin/SH3_domain_protein
TEST	evm.model.Ug_unitig_0.301	ATP-dependent zinc metalloprotease FTSH 11, chloroplastic/mitochondrial	EC:3.4.24;EC:3.6.1.3;EC:3.6.1.15	O	AT5G53170.1	FTSH_protease_11
TEST	evm.model.Ug_unitig_0.265	probable pre-mRNA-splicing factor ATP-dependent RNA helicase DEAH2 isoform X1	EC:3.6.1.3;EC:3.6.4.13;EC:3.6.1.15	A	AT3G62310.1	RNA_helicase_family_protein
TEST	evm.model.Ug_unitig_0.255	DNA replication licensing factor MCM7	EC:3.6.1.3;EC:3.6.4.12;EC:3.6.1.15	L	AT4G02060.2	Minichromosome_maintenance_(MCM2/3/5)_family_protein
TEST	evm.model.Ug_unitig_0.228	RNA helicase	EC:3.6.1.3;EC:3.6.4.13;EC:3.2.1.96;EC:3.6.1.15	A	AT5G05450.1	P-loop_containing_nucleoside_triphosphate_hydrolases_superfamily_protein
TEST	evm.model.Ug_unitig_0.227	Nucleoside phosphatase GDA1/CD39	EC:3.6.1.15;EC:3.6.1.6	F	AT4G19180.3	GDA1/CD39_nucleoside_phosphatase_family_protein
TEST	evm.model.Ug_unitig_0.162	DEAD-box ATP-dependent RNA helicase 41	EC:3.6.1.3;EC:3.6.4.13;EC:3.6.1.15	A	AT3G02065.3	P-loop_containing_nucleoside_triphosphate_hydrolases_superfamily_protein
TEST	evm.model.Ug_unitig_0.124	Calcium-transporting ATPase	EC:3.6.1.3;EC:7.2.2.10;EC:3.6.1.15	P	AT3G63380.1	ATPase_E1-E2_type_family_protein_/_haloacid_dehalogenase-like_hydrolase_family_protein
TEST	evm.model.Ug_unitig_0.96	Dna repair helicase xpd	EC:2.7.11;EC:2.7.11.23;EC:3.6.1.3;EC:3.6.4.12;EC:3.6.1.15	KL	AT1G03190.2	RAD3-like_DNA-binding_helicase_protein
TEST	evm.model.Ug_unitig_0.70	Protein chromatin remodeling 25	EC:3.6.1.3;EC:3.6.1.15	L	AT3G19210.1	DNA_repair/recombination_protein
TEST	evm.model.Ug_unitig_0.8	DNA annealing helicase and endonuclease ZRANB3	EC:3.6.1.15	B	AT5G07810.1	SNF2_domain-containing_protein_/_helicase_domain-containing_protein_/_HNH_endonuclease_domain-containing_protein
REFERENCE	evm.model.Ug_unitig_899.1072	myosin-2-like isoform X1	EC:3.6.1.3;EC:3.6.1.15	Z	AT1G50360.1	P-loop_containing_nucleoside_triphosphate_hydrolases_superfamily_protein
REFERENCE	evm.model.Ug_unitig_899.860	ATP-dependent DNA helicase	EC:3.6.1.3;EC:3.6.4.12;EC:3.6.1.15	L	noTAIR	NULL
REFERENCE	evm.model.Ug_unitig_899.857	ATP-dependent zinc metalloprotease FTSH 2, chloroplastic	EC:3.4.24;EC:3.6.1.3;EC:3.6.1.15;EC:3.6.4.3	O	AT2G30950.3	FtsH_extracellular_protease_family
REFERENCE	evm.model.Ug_unitig_899.772	Mg-protoporphyrin IX chelatase	EC:3.6.1.3;EC:3.6.1.15;EC:6.6.1.1	F	AT5G45930.1	magnesium_chelatase_i2
REFERENCE	evm.model.Ug_unitig_899.626	ras-related protein RABA4d-like	EC:3.6.1.15	U	AT3G12160.1	RAB_GTPase_homolog_A4D
REFERENCE	evm.model.Ug_unitig_899.618	DEAD-box ATP-dependent RNA helicase 37	EC:3.6.1.3;EC:3.6.4.13;EC:3.6.1.15	A	AT3G58570.1	P-loop_containing_nucleoside_triphosphate_hydrolases_superfamily_protein
REFERENCE	evm.model.Ug_unitig_899.575	Tubulin alpha chain	EC:3.6.1.15	Z	AT5G19780.1	tubulin_alpha-5
REFERENCE	evm.model.Ug_unitig_899.566	cell division control protein 45 homolog	EC:3.6.1.3;EC:3.6.4.12;EC:3.6.1.15	L	AT3G25100.1	cell_division_cycle_45
REFERENCE	evm.model.Ug_unitig_899.462	calcium-transporting ATPase 4, endoplasmic reticulum-type-like	EC:3.6.1.3;EC:7.1.2.1;EC:7.2.2.10;EC:3.6.1.15	P	AT1G07670.2	endomembrane-type_CA-ATPase_4
REFERENCE	evm.model.Ug_unitig_899.399	Putative RNA helicase SDE3	EC:3.6.1.3;EC:3.6.4.13;EC:3.6.1.15	L	AT1G05460.1	P-loop_containing_nucleoside_triphosphate_hydrolases_superfamily_protein
REFERENCE	evm.model.Ug_unitig_899.368	dynamin-related protein 5A	EC:3.6.1.15	U	AT5G42080.4	dynamin-like_protein
REFERENCE	evm.model.Ug_unitig_899.289	rac-like GTP-binding protein RHO1	EC:3.6.1.15	S	AT4G35020.3	RAC-like_3
REFERENCE	evm.model.Ug_unitig_899.245	ABC transporter G family member 5-like	EC:3.6.1.3;EC:3.6.1.15	Q	AT2G13610.1	ABC-2_type_transporter_family_protein
REFERENCE	evm.model.Ug_unitig_899.230	Eukaryotic initiation factor 4A	EC:3.6.1.3;EC:3.6.1.15	J	AT4G37020.1	initiation_factor_4A-like_protein
REFERENCE	evm.model.Ug_unitig_899.135	ras-related protein Rab11D	EC:3.6.1.15	U	AT5G65270.1	RAB_GTPase_homolog_A4A
REFERENCE	evm.model.Ug_unitig_899.61	Phosphatidylinositol N-acetylglucosaminyltransferase subunit A like	EC:3.6.1.3;EC:3.6.1.15;EC:2.4.1.198	IMO	AT3G45100.3	UDP-Glycosyltransferase_superfamily_protein
REFERENCE	evm.model.Ug_unitig_750.98	ABC transporter A family member 7	EC:3.6.1.3;EC:3.6.1.15	Q	AT3G47780.1	ABC2_homolog_6
REFERENCE	evm.model.Ug_unitig_750.97	ABC transporter A family member 2	EC:3.6.1.3;EC:3.6.3.25;EC:7.3.2.3;EC:3.6.1.15	I	AT3G47730.1	ATP-binding_cassette_A2
REFERENCE	evm.model.Ug_unitig_750.94	Plasma membrane ATPase	EC:3.6.1.3;EC:7.1.2.1;EC:3.6.1.15	P	AT3G47950.2	H[+]-ATPase_4
REFERENCE	evm.model.Ug_unitig_750.90	Dynein light chain LC6, flagellar outer arm	EC:3.6.1.15	Z	AT5G20110.1	Dynein_light_chain_type_1_family_protein
REFERENCE	evm.model.Ug_unitig_750.65	DUF21 domain-containing protein	EC:3.6.1.3;EC:3.6.1.15	S	AT5G50150.1	NEP-interacting_protein%2C_putative_(DUF239)
REFERENCE	evm.model.Ug_unitig_750.45	pleiotropic drug resistance protein 2-like	EC:3.6.1.3;EC:3.6.1.15;EC:7.2.2.16	Q	AT2G36380.1	pleiotropic_drug_resistance_6
REFERENCE	evm.model.Ug_unitig_750.11	Ras-related protein RABH1b	EC:3.6.1.15	U	AT2G44610.1	Ras-related_small_GTP-binding_family_protein
REFERENCE	evm.model.Ug_unitig_749.1073	Kinesin-like protein	EC:3.6.1.3;EC:3.6.1.15	Z	AT1G01950.1	armadillo_repeat_kinesin_2
REFERENCE	evm.model.Ug_unitig_749.942	Myosin XI	EC:3.6.1.3;EC:5.99.1.2;EC:3.6.1.15	Z	AT5G20490.2	myosin_family_protein_with_Dil
REFERENCE	evm.model.Ug_unitig_749.912	Calcium-transporting ATPase	EC:3.6.1.3;EC:7.2.2.10;EC:3.6.1.15	P	AT4G29900.2	autoinhibited_Ca(2+)-ATPase_10
REFERENCE	evm.model.Ug_unitig_749.808	ATP-dependent helicase/deoxyribonuclease subunit B	EC:3.6.1.3;EC:3.6.1.15	none	AT3G51610.1	ATP-dependent_helicase/deoxyribonuclease_subunit_B
REFERENCE	evm.model.Ug_unitig_749.733	DExH-box ATP-dependent RNA helicase DExH17 isoform X1	EC:3.6.1.3;EC:3.6.4.12;EC:3.6.4.13;EC:3.6.1.15	A	AT3G27730.7	DNA_helicase_ROCK-N-ROLLERS
REFERENCE	evm.model.Ug_unitig_749.720	Rac-like GTP-binding protein 5	EC:3.6.1.15	V	AT4G35020.3	RAC-like_3
REFERENCE	evm.model.Ug_unitig_749.691	Ras-related protein raba1f	EC:3.6.1.15	U	AT5G60860.1	RAB_GTPase_homolog_A1F
REFERENCE	evm.model.Ug_unitig_749.633	endoplasmin homolog	EC:3.6.1.3;EC:3.6.1.15	O	AT4G24190.2	Chaperone_protein_htpG_family_protein
REFERENCE	evm.model.Ug_unitig_749.565	GTP-binding nuclear protein	EC:3.6.1.15	U	AT5G55190.1	RAN_GTPase_3
REFERENCE	evm.model.Ug_unitig_749.539	ATP-dependent DNA helicase 2 subunit KU80	EC:3.6.1.3;EC:3.6.4.12;EC:3.6.1.15	L	AT1G48050.1	Ku80_family_protein
REFERENCE	evm.model.Ug_unitig_749.485	26S proteasome regulatory subunit 4 homolog A	EC:3.6.1.3;EC:3.6.1.15	O	AT4G29040.1	regulatory_particle_AAA-ATPase_2A
REFERENCE	evm.model.Ug_unitig_749.368	40S ribosomal protein S8	EC:3.6.1.15	J	AT5G59240.1	Ribosomal_protein_S8e_family_protein
REFERENCE	evm.model.Ug_unitig_749.355	Tubulin alpha chain	EC:3.6.1.15	Z	AT5G19780.1	tubulin_alpha-5
REFERENCE	evm.model.Ug_unitig_749.292	myosin-2-like isoform X1	EC:3.6.1.3;EC:3.6.1.15	Z	AT5G54280.2	myosin_2
REFERENCE	evm.model.Ug_unitig_749.285	Tubulin alpha chain	EC:3.6.1.15	Z	AT5G19780.1	tubulin_alpha-5
REFERENCE	evm.model.Ug_unitig_749.234	Dynein light chain	EC:3.6.1.3;EC:3.6.1.15;EC:3.6.4.4	Z	noTAIR	NULL
REFERENCE	evm.model.Ug_unitig_748.1444	Kinesin-like protein	EC:3.6.1.15	Z	AT3G51150.1	ATP_binding_microtubule_motor_family_protein
REFERENCE	evm.model.Ug_unitig_748.1398	Tubulin alpha chain	EC:3.6.1.15	Z	AT5G19780.1	tubulin_alpha-5
REFERENCE	evm.model.Ug_unitig_748.1228	V-type proton ATPase subunit	EC:3.6.1.3;EC:7.1.2.1;EC:3.6.1.15	C	AT3G28715.1	ATPase%2C_V0/A0_complex%2C_subunit_C/D
REFERENCE	evm.model.Ug_unitig_748.1225	Tubulin alpha chain	EC:3.6.1.15	Z	AT4G14960.2	Tubulin/FtsZ_family_protein
REFERENCE	evm.model.Ug_unitig_748.1211	ABC transporter B family member 27-like	EC:3.6.1.3;EC:7.6.2.2;EC:3.6.1.15	Q	AT5G39040.1	transporter_associated_with_antigen_processing_protein_2
REFERENCE	evm.model.Ug_unitig_748.1210	ABC transporter B family member 27-like	EC:3.6.1.3;EC:7.6.2.2;EC:3.6.1.15	Q	AT5G39040.1	transporter_associated_with_antigen_processing_protein_2
REFERENCE	evm.model.Ug_unitig_748.1181	GTP-binding protein OBGC, chloroplastic	EC:3.6.1.15	J	AT5G18570.1	GTP1/OBG_family_protein
REFERENCE	evm.model.Ug_unitig_748.1140	Histone acetyltransferase	EC:3.6.1.3;EC:3.6.1.15	S	AT4G14920.2	Acyl-CoA_N-acyltransferase_with_RING/FYVE/PHD-type_zinc_finger_protein
REFERENCE	evm.model.Ug_unitig_748.1025	pleiotropic drug resistance protein 1-like	EC:3.6.1.3;EC:3.6.1.15	Q	AT1G15520.1	pleiotropic_drug_resistance_12
REFERENCE	evm.model.Ug_unitig_748.1024	pleiotropic drug resistance protein 1-like	EC:3.6.1.3;EC:3.6.3.25;EC:7.3.2.3;EC:3.6.1.15	Q	AT1G15520.1	pleiotropic_drug_resistance_12
REFERENCE	evm.model.Ug_unitig_748.1023	Pleiotropic drug resistance protein 1-like	EC:3.6.1.3;EC:3.6.3.25;EC:7.6.2.11;EC:7.3.2.2;EC:7.3.2.3;EC:3.6.1.15	Q	AT1G15520.2	pleiotropic_drug_resistance_12
REFERENCE	evm.model.Ug_unitig_748.1017	pleiotropic drug resistance protein 1-like	EC:3.6.1.3;EC:3.6.3.25;EC:7.3.2.3;EC:3.6.1.15	Q	AT4G15233.5	ABC-2_and_Plant_PDR_ABC-type_transporter_family_protein
REFERENCE	evm.model.Ug_unitig_748.978	Eukaryotic initiation factor 4A-3	EC:3.6.1.3;EC:3.6.4.13;EC:3.6.1.15	A	AT3G19760.1	eukaryotic_initiation_factor_4A-III
REFERENCE	evm.model.Ug_unitig_748.976	eukaryotic initiation factor 4A-3	EC:3.6.1.3;EC:3.6.4.13;EC:3.6.1.15	A	AT3G19760.1	eukaryotic_initiation_factor_4A-III
REFERENCE	evm.model.Ug_unitig_748.886	Calcium-transporting ATPase	EC:3.6.1.3;EC:7.2.2.10;EC:3.6.1.15	P	AT3G21180.1	autoinhibited_Ca(2+)-ATPase_9
REFERENCE	evm.model.Ug_unitig_748.885	Calcium-transporting ATPase	EC:3.6.1.3;EC:7.2.2.10;EC:3.6.1.15	P	AT3G21180.1	autoinhibited_Ca(2+)-ATPase_9
REFERENCE	evm.model.Ug_unitig_748.849	Ribosome biogenesis protein BMS1	EC:3.6.1.15	J	AT1G06720.1	P-loop_containing_nucleoside_triphosphate_hydrolases_superfamily_protein
REFERENCE	evm.model.Ug_unitig_748.569	Ras-related protein raba5a	EC:3.6.1.15	U	AT5G47520.1	RAB_GTPase_homolog_A5A
REFERENCE	evm.model.Ug_unitig_748.541	UPF0051 protein ABCI8, chloroplastic-like	EC:3.6.1.3;EC:3.6.1.15	O	AT4G04770.1	ATP_binding_cassette_protein_1
REFERENCE	evm.model.Ug_unitig_748.540	UPF0051 protein ABCI8, chloroplastic-like	EC:3.6.1.3;EC:3.6.1.15	O	AT4G04770.1	ATP_binding_cassette_protein_1
REFERENCE	evm.model.Ug_unitig_748.375	ABC transporter E family member 2	EC:3.6.1.3;EC:3.6.1.15	C	AT4G19210.1	RNAse_l_inhibitor_protein_2
REFERENCE	evm.model.Ug_unitig_748.354	developmentally-regulated G-protein 2	EC:3.6.1.15	T	AT1G72660.3	P-loop_containing_nucleoside_triphosphate_hydrolases_superfamily_protein
REFERENCE	evm.model.Ug_unitig_748.262	GTP binding protein (Fragment)	EC:3.6.1.15	U	AT4G19640.1	Ras-related_small_GTP-binding_family_protein
REFERENCE	evm.model.Ug_unitig_748.145	Putative ABC transporter C family member 15	EC:3.6.1.3;EC:7.6.2.2;EC:3.6.1.15	Q	AT3G60970.1	multidrug_resistance-associated_protein_15
REFERENCE	evm.model.Ug_unitig_748.142	Abc transporter c family member 9	EC:3.6.1.3;EC:7.6.2.2;EC:3.6.1.15	Q	AT3G60160.1	multidrug_resistance-associated_protein_9
REFERENCE	evm.model.Ug_unitig_748.141	Dynamin-related protein 1E-like	EC:3.6.1.15	U	AT3G60190.1	DYNAMIN-like_1E
REFERENCE	evm.model.Ug_unitig_748.67	Kinesin-like protein kca2	EC:3.6.1.3;EC:3.6.4.5;EC:3.6.1.15	Z	AT5G10470.2	kinesin_like_protein_for_actin_based_chloroplast_movement_1
REFERENCE	evm.model.Ug_unitig_748.8	ras-related protein RABB1b	EC:3.6.1.15	U	AT4G35860.1	GTP-binding_2
REFERENCE	evm.model.Ug_unitig_747.849	Ras-related protein rabe1c	EC:3.1.4.12;EC:3.6.1.15	U	AT3G46060.3	RAB_GTPase_homolog_8A
REFERENCE	evm.model.Ug_unitig_747.842	calcium-transporting ATPase 4, endoplasmic reticulum-type-like	EC:3.6.1.3;EC:7.1.2.1;EC:7.2.2.10;EC:3.6.1.15	P	AT1G07670.2	endomembrane-type_CA-ATPase_4
REFERENCE	evm.model.Ug_unitig_747.809	ABC transporter F family member 1-like	EC:3.6.1.3;EC:3.6.1.15	S	AT5G60790.1	ABC_transporter_family_protein
REFERENCE	evm.model.Ug_unitig_747.790	Protein translocase subunit SecA	EC:3.6.1.3;EC:3.6.1.15	none	AT3G51010.1	protein_translocase_subunit
REFERENCE	evm.model.Ug_unitig_747.697	Myosin ID heavy chain	EC:3.6.1.3;EC:3.6.1.15	S	AT5G53310.1	myosin_heavy_chain-like_protein
REFERENCE	evm.model.Ug_unitig_747.680	Tubulin alpha chain	EC:3.6.1.15	Z	AT4G14960.2	Tubulin/FtsZ_family_protein
REFERENCE	evm.model.Ug_unitig_747.657	Cancer-related nucleoside-triphosphatase	EC:3.6.1.15	O	AT5G66005.3	Expressed_protein
REFERENCE	evm.model.Ug_unitig_747.636	ABC transporter B family member 20	EC:3.6.1.3;EC:7.6.2.2;EC:3.6.1.15	Q	AT3G55320.1	P-glycoprotein_20
REFERENCE	evm.model.Ug_unitig_747.635	ABC transporter B family member 20 isoform X2	EC:3.6.1.3;EC:7.6.2.2;EC:3.6.1.15	Q	AT3G55320.1	P-glycoprotein_20
REFERENCE	evm.model.Ug_unitig_747.626	Sodium sulfate symporter	EC:3.6.3.16;EC:3.6.1.3;EC:3.6.1.15	P	AT1G02260.2	Divalent_ion_symporter
REFERENCE	evm.model.Ug_unitig_747.528	DNA mismatch repair protein MSH1, mitochondrial isoform X2	EC:3.6.1.3;EC:3.6.1.15	L	AT3G24320.1	MUTL_protein_homolog_1
REFERENCE	evm.model.Ug_unitig_747.504	meiotic recombination protein SPO11-1	EC:3.1.31;EC:3.6.1.3;EC:3.1.22;EC:5.99.1.3;EC:3.6.1.15	L	AT3G13170.1	Spo11/DNA_topoisomerase_VI%2C_subunit_A_protein
REFERENCE	evm.model.Ug_unitig_747.503	Meiotic recombination protein SPO11-1	EC:3.1.31;EC:3.6.1.3;EC:3.1.22;EC:5.99.1.3;EC:3.6.1.15	L	AT3G13170.3	Spo11/DNA_topoisomerase_VI%2C_subunit_A_protein
REFERENCE	evm.model.Ug_unitig_747.351	ATP-dependent DNA helicase mph1 isoform X1	EC:3.6.1.3;EC:3.6.4.12;EC:3.6.1.15	A	AT1G35530.1	DEAD/DEAH_box_RNA_helicase_family_protein
REFERENCE	evm.model.Ug_unitig_747.322	26S protease regulatory subunit 6B-like protein	EC:3.6.1.3;EC:3.6.1.15	O	AT5G58290.1	regulatory_particle_triple-A_ATPase_3
REFERENCE	evm.model.Ug_unitig_747.251	DNA gyrase subunit A, chloroplastic/mitochondrial	EC:3.6.1.3;EC:5.99.1.3;EC:3.6.1.15	B	AT3G10690.1	DNA_GYRASE_A
REFERENCE	evm.model.Ug_unitig_747.170	26S protease regulatory subunit 6A homolog	EC:3.6.1.3;EC:3.6.1.15	O	AT3G05530.1	regulatory_particle_triple-A_ATPase_5A
REFERENCE	evm.model.Ug_unitig_747.164	Ras-related protein RABA2a	EC:3.6.1.15	U	AT1G09630.1	RAB_GTPase_11C
REFERENCE	evm.model.Ug_unitig_747.110	Kinesin-like protein kin-7d, mitochondrial	EC:3.6.1.3;EC:3.6.1.15;EC:3.6.4.4	Z	AT4G39050.1	Kinesin_motor_family_protein
REFERENCE	evm.model.Ug_unitig_746.324	Kinesin-like protein	EC:3.6.1.3;EC:3.6.1.15;EC:3.6.4.4	Z	AT4G14330.1	P-loop_containing_nucleoside_triphosphate_hydrolases_superfamily_protein
REFERENCE	evm.model.Ug_unitig_746.267	myosin-2-like isoform X1	EC:3.6.1.3;EC:3.6.1.15	Z	AT5G54280.2	myosin_2
REFERENCE	evm.model.Ug_unitig_746.190	Mg-protoporphyrin IX chelatase	EC:3.6.1.3;EC:3.6.1.15;EC:6.6.1.1	F	AT5G45930.1	magnesium_chelatase_i2
REFERENCE	evm.model.Ug_unitig_746.118	ATP-dependent zinc metalloprotease FTSH 2, chloroplastic	EC:3.4.24;EC:3.6.1.3;EC:3.6.1.15;EC:3.6.4.3	O	AT2G30950.3	FtsH_extracellular_protease_family
REFERENCE	evm.model.Ug_unitig_746.36	Mitochondrial import inner membrane translocase subunit TIM44-2	EC:3.6.1.3;EC:7.4.2.3;EC:7.4.2.4;EC:7.4.2.5;EC:3.6.1.15	U	AT2G36070.1	translocase_inner_membrane_subunit_44-2
REFERENCE	evm.model.Ug_unitig_744.641	probable rRNA-processing protein EBP2 homolog	EC:1.3.1.74;EC:3.6.1.15	A	AT3G22660.1	rRNA_processing_protein-like_protein
REFERENCE	evm.model.Ug_unitig_744.631	ras-related protein RABE1c-like	EC:3.6.1.15	U	AT3G53610.3	RAB_GTPase_homolog_8
REFERENCE	evm.model.Ug_unitig_744.630	Heat shock cognate 70 kDa protein 2-like	EC:1.3.1.74;EC:3.6.1.3;EC:3.6.1.15	O	AT5G02500.1	heat_shock_cognate_protein_70-1
REFERENCE	evm.model.Ug_unitig_744.514	Ras-related protein RABA1f	EC:3.6.1.15	U	AT5G60860.1	RAB_GTPase_homolog_A1F
REFERENCE	evm.model.Ug_unitig_744.488	Putative WD repeat-containing protein C2A9.03 isoform A	EC:3.6.1.3;EC:3.6.1.15;EC:3.6.4.3	S	AT3G13340.3	Transducin/WD40_repeat-like_superfamily_protein
REFERENCE	evm.model.Ug_unitig_744.412	Pre-mRNA-splicing factor ATP-dependent RNA helicase DEAH7	EC:3.6.1.3;EC:3.6.1.15	S	AT5G13010.1	RNA_helicase_family_protein
REFERENCE	evm.model.Ug_unitig_744.411	pre-mRNA-splicing factor ATP-dependent RNA helicase DEAH7	EC:3.6.1.3;EC:3.6.4.13;EC:3.6.1.15	A	AT5G13010.1	RNA_helicase_family_protein
REFERENCE	evm.model.Ug_unitig_744.393	Rac-like GTP-binding protein 3	EC:3.6.1.15	S	AT3G48040.1	RHO-related_protein_from_plants_10
REFERENCE	evm.model.Ug_unitig_744.282	F-box protein skip23	EC:3.6.1.3;EC:3.6.4.12;EC:3.6.1.15	S	AT2G17030.1	F-box_SKIP23-like_protein_(DUF295)
REFERENCE	evm.model.Ug_unitig_744.258	V-type proton ATPase subunit a	EC:7.1.3.1;EC:3.6.1.3;EC:7.1.2.1;EC:3.6.1.15	P	AT4G39080.1	vacuolar_proton_ATPase_A3
REFERENCE	evm.model.Ug_unitig_744.170	Tubulin beta chain	EC:3.6.1.15	Z	AT5G12250.1	beta-6_tubulin
REFERENCE	evm.model.Ug_unitig_744.118	Kinesin-like protein	EC:3.6.1.3;EC:3.6.1.15;EC:3.6.4.4	Z	AT5G60930.3	P-loop_containing_nucleoside_triphosphate_hydrolases_superfamily_protein
REFERENCE	evm.model.Ug_unitig_744.18	type 2 DNA topoisomerase 6 subunit B-like	EC:3.6.1.3;EC:5.99.1.3;EC:3.6.1.15	none	AT1G60460.2	hypothetical_protein
REFERENCE	evm.model.Ug_unitig_736.562	Dynamin-related protein 5a	EC:3.6.1.15	U	AT5G42080.4	dynamin-like_protein
REFERENCE	evm.model.Ug_unitig_736.491	Rac-like GTP-binding protein ARAC1	EC:3.6.1.15	S	AT2G17800.2	RAC-like_1
REFERENCE	evm.model.Ug_unitig_736.459	ABC transporter G family member 5-like	EC:3.6.1.3;EC:3.6.1.15	Q	AT2G13610.1	ABC-2_type_transporter_family_protein
REFERENCE	evm.model.Ug_unitig_736.378	ras-related protein Rab11D	EC:3.6.1.15	U	AT5G65270.1	RAB_GTPase_homolog_A4A
REFERENCE	evm.model.Ug_unitig_736.242	calcium-transporting ATPase 4, endoplasmic reticulum-type-like	EC:3.6.1.3;EC:7.1.2.1;EC:7.2.2.10;EC:3.6.1.15	P	AT1G07670.2	endomembrane-type_CA-ATPase_4
REFERENCE	evm.model.Ug_unitig_736.230	Adenylate kinase isoenzyme 6 homolog	EC:2.7.4.4;EC:2.7.4.3;EC:3.6.1.3;EC:3.1.11;EC:3.1.15;EC:3.6.1.15	F	AT5G60340.1	P-loop_containing_nucleoside_triphosphate_hydrolases_superfamily_protein
REFERENCE	evm.model.Ug_unitig_736.154	cell division control protein 45 homolog	EC:3.6.1.3;EC:3.6.4.12;EC:3.6.1.15	L	AT3G25100.1	cell_division_cycle_45
REFERENCE	evm.model.Ug_unitig_736.148	Tubulin alpha chain	EC:3.6.1.15	Z	AT5G19780.1	tubulin_alpha-5
REFERENCE	evm.model.Ug_unitig_736.122	DEAD-box ATP-dependent RNA helicase 37-like	EC:3.6.1.3;EC:3.6.4.13;EC:3.6.1.15	A	AT2G42520.3	P-loop_containing_nucleoside_triphosphate_hydrolases_superfamily_protein
REFERENCE	evm.model.Ug_unitig_736.113	ras-related protein RABA4d	EC:3.6.1.15	U	AT3G12160.1	RAB_GTPase_homolog_A4D
REFERENCE	evm.model.Ug_unitig_699.789	Kinesin-like protein	EC:3.6.1.3;EC:3.6.1.15;EC:3.6.4.4	Z	AT4G39050.1	Kinesin_motor_family_protein
REFERENCE	evm.model.Ug_unitig_699.750	Ras-related protein RABA2a	EC:3.6.1.15	U	AT1G09630.1	RAB_GTPase_11C
REFERENCE	evm.model.Ug_unitig_699.742	26S protease regulatory subunit 6A homolog	EC:3.6.1.3;EC:3.6.1.15	O	AT3G05530.1	regulatory_particle_triple-A_ATPase_5A
REFERENCE	evm.model.Ug_unitig_699.664	Elongation factor G, chloroplastic	EC:3.6.1.15	J	AT1G62750.1	Translation_elongation_factor_EFG/EF2_protein
REFERENCE	evm.model.Ug_unitig_699.606	rac-like GTP-binding protein RHO1	EC:3.6.1.15	S	AT4G35020.3	RAC-like_3
REFERENCE	evm.model.Ug_unitig_699.507	ras-related protein RABH1e	EC:3.6.1.15	U	AT5G10260.1	RAB_GTPase_homolog_H1E
REFERENCE	evm.model.Ug_unitig_699.489	Kinesin-like protein	EC:3.6.1.15	Z	AT4G38950.5	ATP_binding_microtubule_motor_family_protein
REFERENCE	evm.model.Ug_unitig_699.460	ATP synthase subunit beta	EC:3.6.1.3;EC:3.6.1.15	C	AT5G08680.1	ATP_synthase_alpha/beta_family_protein
REFERENCE	evm.model.Ug_unitig_699.459	ATP synthase subunit beta	EC:3.6.1.3;EC:3.6.1.15	C	AT5G08680.1	ATP_synthase_alpha/beta_family_protein
REFERENCE	evm.model.Ug_unitig_699.423	Nucleotidylyl transferase superfamily protein	EC:2.7.7.1;EC:3.6.1.3;EC:3.6.1.15	S	AT2G01220.2	Nucleotidylyl_transferase_superfamily_protein
REFERENCE	evm.model.Ug_unitig_699.406	cell division protein FtsZ homolog 1, chloroplastic-like	EC:3.6.1.15	F	AT5G55280.1	homolog_of_bacterial_cytokinesis_Z-ring_protein_FTSZ_1-1
REFERENCE	evm.model.Ug_unitig_699.394	V-type proton ATPase subunit E-like	EC:3.6.1.3;EC:7.1.2.1;EC:3.6.1.15	C	AT4G11150.1	vacuolar_ATP_synthase_subunit_E1
REFERENCE	evm.model.Ug_unitig_699.286	Alba-like protein C9orf23	EC:3.1.30;EC:3.6.1.3;EC:3.1.26;EC:3.1.26.5;EC:3.6.1.15	S	AT3G07030.5	Alba_DNA/RNA-binding_protein
REFERENCE	evm.model.Ug_unitig_699.189	Putative ovule protein	EC:3.6.1.3;EC:3.6.1.15	none	AT1G53035.1	transmembrane_protein
REFERENCE	evm.model.Ug_unitig_699.158	cell division cycle protein 48 homolog	EC:3.6.1.3;EC:3.6.1.15;EC:3.6.4.3	O	AT5G03340.1	ATPase%2C_AAA-type%2C_CDC48_protein
REFERENCE	evm.model.Ug_unitig_699.99	Guanylate-binding protein like	EC:3.6.1.15	L	AT5G46070.1	Guanylate-binding_family_protein
REFERENCE	evm.model.Ug_unitig_578.968	pre-mRNA-splicing factor syf2-like	EC:3.6.1.15	AD	AT2G16860.2	GCIP-interacting_family_protein
REFERENCE	evm.model.Ug_unitig_578.863	DEAD-box ATP-dependent RNA helicase 24	EC:3.6.1.3;EC:3.6.1.15	S	AT2G47330.1	P-loop_containing_nucleoside_triphosphate_hydrolases_superfamily_protein
REFERENCE	evm.model.Ug_unitig_578.845	ATP-dependent DNA helicase SRS2-like protein At4g25120	EC:3.6.1.3;EC:3.6.4.12;EC:3.6.1.15	L	AT4G25120.1	P-loop_containing_nucleoside_triphosphate_hydrolases_superfamily_protein
REFERENCE	evm.model.Ug_unitig_578.844	Translocase of chloroplast	EC:7.4.2.3;EC:7.4.2.4;EC:3.6.1.15	F	AT5G05000.3	translocon_at_the_outer_envelope_membrane_of_chloroplasts_34
REFERENCE	evm.model.Ug_unitig_578.806	Eukaryotic initiation factor 4A-11	EC:3.6.1.3;EC:3.6.1.15	A	AT3G13920.1	eukaryotic_translation_initiation_factor_4A1
REFERENCE	evm.model.Ug_unitig_578.801	DEAD-box ATP-dependent RNA helicase 56	EC:3.6.1.3;EC:3.6.1.15	A	AT5G11200.1	DEAD/DEAH_box_RNA_helicase_family_protein
REFERENCE	evm.model.Ug_unitig_578.791	Calcium-transporting ATPase	EC:3.6.1.3;EC:7.2.2.10;EC:3.6.1.15	P	AT1G27770.4	autoinhibited_Ca2+-ATPase_1
REFERENCE	evm.model.Ug_unitig_578.731	ABC transporter G family member 22	EC:3.6.1.3;EC:7.3.2.5;EC:3.6.1.15	Q	AT5G06530.2	ABC-2_type_transporter_family_protein
REFERENCE	evm.model.Ug_unitig_578.684	Phytochelatin synthase	EC:3.6.3.16;EC:3.6.1.3;EC:2.3.2.15;EC:3.6.1.15	P	AT5G44070.1	phytochelatin_synthase_1_(PCS1)
REFERENCE	evm.model.Ug_unitig_578.671	DNA repair protein recA homolog 3, mitochondrial-like	EC:3.6.1.3;EC:3.6.1.8;EC:3.6.1.19;EC:3.6.1.15	L	AT2G19490.1	recA_DNA_recombination_family_protein
REFERENCE	evm.model.Ug_unitig_578.596	ras-related protein RABA5e-like	EC:3.6.1.15	U	AT2G31680.1	RAB_GTPase_homolog_A5D
REFERENCE	evm.model.Ug_unitig_578.577	elongation factor 2	EC:3.6.1.15	J	AT1G56070.3	Ribosomal_protein_S5/Elongation_factor_G/III/V_family_protein
REFERENCE	evm.model.Ug_unitig_578.575	elongation factor 2	EC:3.6.1.15	J	AT1G56070.3	Ribosomal_protein_S5/Elongation_factor_G/III/V_family_protein
REFERENCE	evm.model.Ug_unitig_578.550	heat shock cognate 70 kDa protein	EC:3.6.1.3;EC:3.6.1.15	O	AT3G12580.1	heat_shock_protein_70
REFERENCE	evm.model.Ug_unitig_578.378	Glycine-rich protein	EC:3.6.1.3;EC:3.6.1.15	none	AT4G10330.1	glycine-rich_protein
REFERENCE	evm.model.Ug_unitig_578.329	elongation factor 2	EC:3.6.1.15;EC:3.4.19.12	J	AT1G56070.3	Ribosomal_protein_S5/Elongation_factor_G/III/V_family_protein
REFERENCE	evm.model.Ug_unitig_578.242	protein CMSS1-like	EC:3.6.1.3;EC:3.6.1.15	S	AT2G43110.1	U3_containing_90S_pre-ribosomal_complex_subunit
REFERENCE	evm.model.Ug_unitig_578.94	ras-related protein RABC2a-like	EC:3.6.1.15	U	AT5G03530.2	RAB_GTPase_homolog_C2A
REFERENCE	evm.model.Ug_unitig_92.177	AAA-ATPase At2g46620-like	EC:3.6.1.3;EC:3.6.1.15	O	AT2G46620.1	P-loop_containing_nucleoside_triphosphate_hydrolases_superfamily_protein
REFERENCE	evm.model.Ug_unitig_92.117	twinkle homolog protein, chloroplastic/mitochondrial	EC:3.6.1.3;EC:3.6.4.12;EC:2.7.7.6;EC:3.6.1.15	L	AT1G30680.1	toprim_domain-containing_protein
REFERENCE	evm.model.Ug_unitig_92.115	Tubulin beta chain	EC:3.6.1.15	Z	AT5G23860.2	tubulin_beta_8
REFERENCE	evm.model.Ug_unitig_92.82	TATA-binding protein-associated factor BTAF1-like	EC:3.6.1.3;EC:3.6.1.15	K	AT3G54280.1	ROOT_GROWTH_DEFECTIVE_3
REFERENCE	evm.model.Ug_unitig_90.31	ABC-2 type transporter family protein isoform 1	EC:3.6.1.3;EC:3.6.1.15	Q	AT3G21090.1	ABC-2_type_transporter_family_protein
REFERENCE	evm.model.Ug_unitig_90.8	GTP-binding protein SAR1A	EC:3.6.1.15	U	AT4G02080.1	secretion-associated_RAS_super_family_2
REFERENCE	evm.model.Ug_unitig_88.150	Heat shock cognate 70 kDa protein 2-like	EC:1.3.1.74;EC:3.6.1.3;EC:3.6.1.15	O	AT5G02500.1	heat_shock_cognate_protein_70-1
REFERENCE	evm.model.Ug_unitig_88.123	Ras-related protein rabh1e	EC:3.6.1.15	U	AT5G10260.1	RAB_GTPase_homolog_H1E
REFERENCE	evm.model.Ug_unitig_88.118	Kinesin-like protein	EC:3.6.1.3;EC:3.6.1.15;EC:3.6.4.4	Z	AT3G49650.1	P-loop_containing_nucleoside_triphosphate_hydrolases_superfamily_protein
REFERENCE	evm.model.Ug_unitig_88.114	Kinesin-like protein	EC:3.6.1.3;EC:3.6.1.15	Z	AT3G16630.2	P-loop_containing_nucleoside_triphosphate_hydrolases_superfamily_protein
REFERENCE	evm.model.Ug_unitig_88.40	putative ribosome biogenesis GTPase RsgA	EC:3.6.1.15	S	AT1G67440.2	Minichromosome_maintenance_(MCM2/3/5)_family_protein
REFERENCE	evm.model.Ug_unitig_88.13	DNA repair protein RadA-like isoform X1	EC:3.6.1.3;EC:3.6.1.15	L	AT5G50340.2	DNA_repair_protein_RadA-like_protein
REFERENCE	evm.model.Ug_unitig_85.195	Transmembrane protein	EC:3.6.1.3;EC:3.6.1.15	V	AT5G55960.1	transmembrane_protein_C9orf5_protein
REFERENCE	evm.model.Ug_unitig_85.189	ABC transporter C family member 3	EC:3.6.1.3;EC:3.6.1.15	Q	AT3G13080.1	multidrug_resistance-associated_protein_3
REFERENCE	evm.model.Ug_unitig_85.187	DUF21 domain-containing protein	EC:3.6.1.3;EC:3.6.1.15	P	AT3G13070.1	CBS_domain-containing_protein_/_transporter_associated_domain-containing_protein
REFERENCE	evm.model.Ug_unitig_85.186	ABC transporter C family member 3	EC:3.6.1.3;EC:3.6.1.15	Q	AT3G13080.1	multidrug_resistance-associated_protein_3
REFERENCE	evm.model.Ug_unitig_85.40	DEAD-box ATP-dependent RNA helicase 24	EC:3.6.1.3;EC:3.6.4.13;EC:3.6.1.15	A	noTAIR	NULL
REFERENCE	evm.model.Ug_unitig_85.39	DEAD-box ATP-dependent RNA helicase	EC:3.6.1.3;EC:3.6.4.13;EC:3.6.1.15	A	AT2G47330.1	P-loop_containing_nucleoside_triphosphate_hydrolases_superfamily_protein
REFERENCE	evm.model.Ug_unitig_63.9	Dead-box atp-dependent rna helicase 35	EC:3.6.1.3;EC:3.6.4.13;EC:3.6.1.15	A	AT5G51280.1	DEAD-box_protein_abstrakt
REFERENCE	evm.model.Ug_unitig_62.766	Eceriferum 5 (Fragment)	EC:3.6.1.3;EC:7.3.2.5;EC:7.3.2.2;EC:3.6.1.15	Q	AT3G21090.1	ABC-2_type_transporter_family_protein
REFERENCE	evm.model.Ug_unitig_62.765	ABC transporter G family member 15-like	EC:3.6.1.3;EC:3.6.1.15	Q	AT3G21090.1	ABC-2_type_transporter_family_protein
REFERENCE	evm.model.Ug_unitig_62.764	Eceriferum 5 (Fragment)	EC:3.6.1.3;EC:3.6.1.15	Q	AT3G21090.1	ABC-2_type_transporter_family_protein
REFERENCE	evm.model.Ug_unitig_62.660	Kinesin-like protein	EC:3.6.1.3;EC:3.6.1.15	Z	AT3G16060.1	ATP_binding_microtubule_motor_family_protein
REFERENCE	evm.model.Ug_unitig_62.489	Dead-box atp-dependent rna helicase 35	EC:3.6.1.3;EC:3.6.4.13;EC:3.6.1.15	A	AT5G51280.1	DEAD-box_protein_abstrakt
REFERENCE	evm.model.Ug_unitig_62.440	DNA repair helicase XPB1	EC:2.7.11;EC:2.7.11.23;EC:3.6.1.3;EC:3.6.4.12;EC:3.6.1.15	KL	AT5G41360.2	homolog_of_Xeroderma_pigmentosum_complementation_group_B_2
REFERENCE	evm.model.Ug_unitig_62.439	DNA repair helicase XPB1	EC:2.7.11;EC:2.7.11.23;EC:3.6.1.3;EC:3.6.4.12;EC:3.6.1.15	KL	AT5G41370.1	DNA_repair_helicase_XPB1-like_protein
REFERENCE	evm.model.Ug_unitig_62.422	ras-related protein RABC1	EC:3.6.1.15	U	AT1G43890.3	RAB_GTPASE_HOMOLOG_B18
REFERENCE	evm.model.Ug_unitig_62.421	probable protein phosphatase 2C 11	EC:3.1.3.16;EC:3.1.4.12;EC:3.6.1.15	T	AT1G43900.1	Protein_phosphatase_2C_family_protein
REFERENCE	evm.model.Ug_unitig_62.274	ATP-dependent RNA helicase	EC:2.7.11;EC:3.6.1.3;EC:3.6.4.13;EC:3.6.1.15	A	AT5G14610.2	DEAD_box_RNA_helicase_family_protein
REFERENCE	evm.model.Ug_unitig_62.237	Transmembrane protein	EC:3.6.1.3;EC:3.6.1.15	V	AT5G55960.1	transmembrane_protein_C9orf5_protein
REFERENCE	evm.model.Ug_unitig_62.183	DEAD-box ATP-dependent RNA helicase 53-like	EC:3.6.1.3;EC:3.6.4.13;EC:3.6.1.15	A	AT3G22330.1	putative_mitochondrial_RNA_helicase_2
REFERENCE	evm.model.Ug_unitig_61.398	Ras-related protein rgp1	EC:3.6.1.15	U	AT3G12160.1	RAB_GTPase_homolog_A4D
REFERENCE	evm.model.Ug_unitig_61.353	DEAD-box ATP-dependent RNA helicase 8	EC:3.6.1.3;EC:3.6.4.13;EC:3.6.1.15	A	AT4G00660.2	RNAhelicase-like_8
REFERENCE	evm.model.Ug_unitig_61.342	Ribosomal RNA-processing protein	EC:3.6.1.3;EC:3.6.1.15	A	AT5G38720.1	ribosomal_RNA-processing_7_protein
REFERENCE	evm.model.Ug_unitig_61.252	V-type proton ATPase subunit H	EC:3.6.1.3;EC:7.1.2.1;EC:3.6.1.15	C	AT3G42050.1	vacuolar_ATP_synthase_subunit_H_family_protein
REFERENCE	evm.model.Ug_unitig_61.240	Katanin p60 ATPase-containing subunit A1	EC:3.6.1.3;EC:3.6.1.15;EC:3.6.4.3	O	AT1G80350.1	P-loop_containing_nucleoside_triphosphate_hydrolases_superfamily_protein
REFERENCE	evm.model.Ug_unitig_61.197	V-type proton ATPase subunit C	EC:3.6.1.3;EC:7.1.2.1;EC:3.6.1.15	C	AT1G12840.1	vacuolar_ATP_synthase_subunit_C_(VATC)_/_V-ATPase_C_subunit_/_vacuolar_proton_pump_C_subunit_(DET3)
REFERENCE	evm.model.Ug_unitig_61.148	Elongation factor Tu	EC:3.6.1.15	J	AT4G02930.1	GTP_binding_Elongation_factor_Tu_family_protein
REFERENCE	evm.model.Ug_unitig_61.129	probable RNA polymerase II transcription factor B subunit 1-1	EC:2.7.11;EC:2.7.11.23;EC:3.6.1.3;EC:3.6.1.15	KL	AT1G55750.6	BSD_domain_(BTF2-like_transcription_factors%2C_Synapse-associated_proteins_and_DOS2-like_proteins)
REFERENCE	evm.model.Ug_unitig_61.62	dynamin-related protein 3A-like	EC:3.6.1.15	U	AT4G33650.1	dynamin-related_protein_3A
REFERENCE	evm.model.Ug_unitig_61.61	heat shock 70 kDa protein, mitochondrial	EC:3.6.1.3;EC:3.6.1.15	O	AT5G09590.1	mitochondrial_HSO70_2
REFERENCE	evm.model.Ug_unitig_61.21	ABC transporter I family member 10, chloroplastic-like	EC:3.6.1.3;EC:3.6.1.15	Q	AT4G33460.1	ABC_transporter_family_protein
REFERENCE	evm.model.Ug_unitig_60.337	probable pre-mRNA-splicing factor ATP-dependent RNA helicase DEAH9 isoform X1	EC:3.6.1.3;EC:3.6.4.13;EC:3.6.1.15	A	AT4G18465.1	RNA_helicase_family_protein
REFERENCE	evm.model.Ug_unitig_60.220	ATP-dependent Clp protease proteolytic subunit	EC:3.4.21;EC:3.6.1.3;EC:3.6.1.15	O	AT1G02560.1	nuclear_encoded_CLP_protease_5
REFERENCE	evm.model.Ug_unitig_60.215	ABC transporter G family member 15-like	EC:3.6.1.3;EC:7.3.2.5;EC:3.6.1.15	Q	AT3G21090.1	ABC-2_type_transporter_family_protein
REFERENCE	evm.model.Ug_unitig_60.191	Plasma membrane ATPase	EC:3.6.1.3;EC:7.1.2.1;EC:3.6.1.15	P	AT1G80660.1	H[+]-ATPase_9
REFERENCE	evm.model.Ug_unitig_60.102	signal recognition particle receptor subunit alpha-like	EC:3.6.1.15	U	AT4G30600.2	signal_recognition_particle_receptor_alpha_subunit_family_protein
REFERENCE	evm.model.Ug_unitig_60.81	AAA+-type ATPase	EC:3.6.1.3;EC:3.6.1.15	O	AT5G57480.1	P-loop_containing_nucleoside_triphosphate_hydrolases_superfamily_protein
REFERENCE	evm.model.Ug_unitig_60.38	phragmoplast orienting kinesin 2	EC:3.6.1.3;EC:3.6.1.15	Z	AT3G19050.1	phragmoplast_orienting_kinesin_2
REFERENCE	evm.model.Ug_unitig_60.34	Guanine nucleotide-binding protein subunit beta-2	EC:2.3.1.5;EC:2.3.1.48;EC:3.6.1.15	S	AT4G34460.1	GTP_binding_protein_beta_1
REFERENCE	evm.model.Ug_unitig_52.835	Ras-related protein RABD2a	EC:3.6.1.15	U	AT1G02130.1	RAS_5
REFERENCE	evm.model.Ug_unitig_52.806	Tubulin beta chain	EC:3.6.1.15	Z	AT5G23860.2	tubulin_beta_8
REFERENCE	evm.model.Ug_unitig_52.747	DEAD-box ATP-dependent RNA helicase 14	EC:2.7.11;EC:3.6.1.3;EC:3.6.4.13;EC:3.6.1.15	A	AT5G14610.2	DEAD_box_RNA_helicase_family_protein
REFERENCE	evm.model.Ug_unitig_52.625	Ras-related protein RABC1	EC:3.6.1.15	U	AT1G43890.3	RAB_GTPASE_HOMOLOG_B18
REFERENCE	evm.model.Ug_unitig_52.467	sister chromatid cohesion protein DCC1	EC:3.6.1.3;EC:3.6.1.15	D	AT2G44580.2	zinc_ion_binding_protein
REFERENCE	evm.model.Ug_unitig_52.449	Kinesin-like protein	EC:3.6.1.3;EC:3.6.1.15	Z	AT4G21270.1	kinesin_1
REFERENCE	evm.model.Ug_unitig_52.413	DEAD-box ATP-dependent RNA helicase 53-like	EC:3.6.1.3;EC:3.6.4.13;EC:3.6.1.15	A	AT3G22330.1	putative_mitochondrial_RNA_helicase_2
REFERENCE	evm.model.Ug_unitig_52.356	Rac-like GTP-binding protein ARAC1	EC:3.6.1.15	S	AT3G51300.1	RHO-related_protein_from_plants_1
REFERENCE	evm.model.Ug_unitig_52.324	Elongation factor G, chloroplastic	EC:3.6.1.15	J	AT1G62750.1	Translation_elongation_factor_EFG/EF2_protein
REFERENCE	evm.model.Ug_unitig_52.203	Kinesin-like protein	EC:3.6.1.3;EC:3.6.1.15	Z	AT3G16060.1	ATP_binding_microtubule_motor_family_protein
REFERENCE	evm.model.Ug_unitig_52.75	ABC transporter G family member 15-like	EC:3.6.1.3;EC:3.6.1.15	Q	AT3G21090.1	ABC-2_type_transporter_family_protein
REFERENCE	evm.model.Ug_unitig_46.720	Ras-related protein RABD2a (Fragment)	EC:3.6.1.15	U	AT1G02130.1	RAS_5
REFERENCE	evm.model.Ug_unitig_46.588	V-type proton ATPase subunit G	EC:3.6.1.3;EC:7.1.2.1;EC:3.6.1.15	C	AT4G23710.1	vacuolar_ATP_synthase_subunit_G2
REFERENCE	evm.model.Ug_unitig_46.397	ras-related protein Rab11C	EC:3.6.1.15	U	AT1G07410.1	RAB_GTPase_homolog_A2B
REFERENCE	evm.model.Ug_unitig_46.284	Ras-related protein YPT3	EC:3.6.1.15	U	AT1G06400.1	Ras-related_small_GTP-binding_family_protein
REFERENCE	evm.model.Ug_unitig_46.172	DNA repair protein XRCC2 homolog isoform X1	EC:3.6.1.3;EC:3.6.1.15	L	AT5G64520.5	homolog_of_X-ray_repair_cross_complementing_2_(XRCC2)
REFERENCE	evm.model.Ug_unitig_46.91	Putative helicase MAGATAMA 3	EC:3.6.1.3;EC:3.6.1.15	A	AT4G30100.2	P-loop_containing_nucleoside_triphosphate_hydrolases_superfamily_protein
REFERENCE	evm.model.Ug_unitig_46.15	ATP-dependent zinc metalloprotease FTSH 4, mitochondrial-like	EC:3.4.24;EC:3.6.1.3;EC:3.6.1.15;EC:3.6.4.3	O	AT2G26140.1	FTSH_protease_4
REFERENCE	evm.model.Ug_unitig_41.11	Putative rna helicase sde3	EC:3.6.1.3;EC:3.6.4.13;EC:3.6.1.15	L	AT1G05460.1	P-loop_containing_nucleoside_triphosphate_hydrolases_superfamily_protein
REFERENCE	evm.model.Ug_unitig_37.947	Eukaryotic initiation factor 4A-2	EC:3.6.1.3;EC:3.6.1.15	A	AT3G13920.1	eukaryotic_translation_initiation_factor_4A1
REFERENCE	evm.model.Ug_unitig_37.944	Eukaryotic initiation factor 4a-14	EC:3.6.1.3;EC:3.6.1.15	A	AT3G13920.1	eukaryotic_translation_initiation_factor_4A1
REFERENCE	evm.model.Ug_unitig_37.882	Pentatricopeptide repeat-containing protein	EC:3.6.1.15	S	AT2G41080.1	pentatricopeptide_(PPR)_repeat_protein
REFERENCE	evm.model.Ug_unitig_37.812	DNA replication complex GINS protein SLD5	EC:3.6.1.3;EC:3.6.4.12;EC:3.6.1.15	L	AT5G49010.1	DNA_replication_protein-like_protein
REFERENCE	evm.model.Ug_unitig_37.811	Tubulin beta chain	EC:3.6.1.15	Z	AT5G12250.1	beta-6_tubulin
REFERENCE	evm.model.Ug_unitig_37.705	ras-related protein Rab11C	EC:3.6.1.15	U	AT1G07410.1	RAB_GTPase_homolog_A2B
REFERENCE	evm.model.Ug_unitig_37.383	V-type proton ATPase subunit G	EC:3.6.1.3;EC:7.1.2.1;EC:3.6.1.15	C	AT4G23710.1	vacuolar_ATP_synthase_subunit_G2
REFERENCE	evm.model.Ug_unitig_37.311	Kinesin kp1	EC:3.6.1.3;EC:3.6.1.15	Z	noTAIR	NULL
REFERENCE	evm.model.Ug_unitig_37.304	meiotic recombination protein SPO11-2	EC:3.1.31;EC:3.6.1.3;EC:3.1.22;EC:5.99.1.3;EC:3.6.1.15	L	AT1G63990.1	sporulation_11-2
REFERENCE	evm.model.Ug_unitig_37.215	probable inactive ATP-dependent zinc metalloprotease FTSHI 1, chloroplastic	EC:3.6.1.3;EC:3.6.1.15	O	AT4G23940.1	FtsH_extracellular_protease_family
REFERENCE	evm.model.Ug_unitig_37.156	Tubulin beta chain	EC:3.6.1.15	Z	AT5G12250.1	beta-6_tubulin
REFERENCE	evm.model.Ug_unitig_37.76	AAA-ATPase At2g46620-like	EC:3.6.1.3;EC:3.6.1.15	O	AT2G46620.1	P-loop_containing_nucleoside_triphosphate_hydrolases_superfamily_protein
REFERENCE	evm.model.Ug_unitig_37.72	Clp protease regulatory subunit clpx1, mitochondrial	EC:3.6.1.3;EC:3.6.1.15	O	AT5G53350.1	CLP_protease_regulatory_subunit_X
REFERENCE	evm.model.Ug_unitig_37.59	putative septum site-determining protein minD homolog, chloroplastic	EC:3.6.1.3;EC:3.6.1.15	D	AT5G24020.1	septum_site-determining_protein_(MIND)
REFERENCE	evm.model.Ug_unitig_32.962	Tubulin alpha chain	EC:3.6.1.15	Z	AT4G14960.2	Tubulin/FtsZ_family_protein
REFERENCE	evm.model.Ug_unitig_32.947	Chromatin structure-remodeling complex protein SYD	EC:3.6.1.3;EC:3.6.4.12;EC:3.6.1.15	BK	AT2G28290.6	P-loop_containing_nucleoside_triphosphate_hydrolases_superfamily_protein
REFERENCE	evm.model.Ug_unitig_32.858	Developmentally-regulated G-protein 2	EC:3.6.1.15	S	AT1G72660.3	P-loop_containing_nucleoside_triphosphate_hydrolases_superfamily_protein
REFERENCE	evm.model.Ug_unitig_32.670	urease accessory protein G	EC:3.6.1.15	KO	AT2G34470.1	urease_accessory_protein_G
REFERENCE	evm.model.Ug_unitig_32.638	Ras-related protein RABA5a	EC:3.6.1.15	U	AT5G47520.1	RAB_GTPase_homolog_A5A
REFERENCE	evm.model.Ug_unitig_32.574	probable LRR receptor-like serine/threonine-protein kinase At3g47570	EC:2.7.11;EC:3.6.1.3;EC:3.6.1.15	T	AT3G47090.1	Leucine-rich_repeat_protein_kinase_family_protein
REFERENCE	evm.model.Ug_unitig_32.391	protein strawberry notch-like	EC:3.6.1.3;EC:3.6.1.15	KT	AT1G79350.1	RING/FYVE/PHD_zinc_finger_superfamily_protein
REFERENCE	evm.model.Ug_unitig_32.277	eukaryotic initiation factor 4A-3	EC:3.6.1.3;EC:3.6.4.13;EC:3.6.1.15	A	AT3G19760.1	eukaryotic_initiation_factor_4A-III
REFERENCE	evm.model.Ug_unitig_32.160	Histone acetyltransferase	EC:3.6.1.3;EC:3.6.1.15	S	AT4G14920.2	Acyl-CoA_N-acyltransferase_with_RING/FYVE/PHD-type_zinc_finger_protein
REFERENCE	evm.model.Ug_unitig_32.103	ABC transporter B family member 27-like	EC:3.6.1.3;EC:7.6.2.2;EC:3.6.1.15	Q	AT5G39040.1	transporter_associated_with_antigen_processing_protein_2
REFERENCE	evm.model.Ug_unitig_32.93	Tubulin alpha chain	EC:3.6.1.15	Z	AT4G14960.2	Tubulin/FtsZ_family_protein
REFERENCE	evm.model.Ug_unitig_32.81	ras-related protein RHN1	EC:3.6.1.15	U	AT4G19640.1	Ras-related_small_GTP-binding_family_protein
REFERENCE	evm.model.Ug_unitig_32.58	Tubulin-folding cofactor C	EC:3.6.1.15	O	AT4G39920.1	C-CAP/cofactor_C-like_domain-containing_protein
REFERENCE	evm.model.Ug_unitig_32.43	Heat shock protein 70	EC:3.6.1.3;EC:3.6.1.15	O	AT3G12580.1	heat_shock_protein_70
REFERENCE	evm.model.Ug_unitig_28.5	Ras-related protein rabh1e	EC:3.6.1.15	U	AT5G10260.1	RAB_GTPase_homolog_H1E
REFERENCE	evm.model.Ug_unitig_28.1	elongation factor-like GTPase 1	EC:3.6.1.15	J	AT3G22980.3	Ribosomal_protein_S5/Elongation_factor_G/III/V_family_protein
REFERENCE	evm.model.Ug_unitig_27.552	Ras-related protein rabh1e	EC:3.6.1.15	U	AT5G10260.1	RAB_GTPase_homolog_H1E
REFERENCE	evm.model.Ug_unitig_27.549	elongation factor-like GTPase 1	EC:3.6.1.15	J	AT3G22980.3	Ribosomal_protein_S5/Elongation_factor_G/III/V_family_protein
REFERENCE	evm.model.Ug_unitig_27.525	Kinesin-like protein	EC:3.6.1.3;EC:3.6.1.15	Z	AT2G21300.5	ATP_binding_microtubule_motor_family_protein
REFERENCE	evm.model.Ug_unitig_27.505	Katanin p80 WD40 repeat-containing subunit B1 homolog	EC:3.6.1.3;EC:3.6.1.15;EC:3.6.4.3	Z	AT5G23430.1	Transducin/WD40_repeat-like_superfamily_protein
REFERENCE	evm.model.Ug_unitig_27.474	ATP synthase subunit beta	EC:3.6.1.3;EC:3.6.1.15	C	AT5G08680.1	ATP_synthase_alpha/beta_family_protein
REFERENCE	evm.model.Ug_unitig_27.382	cell division protein FtsZ homolog 1, chloroplastic-like	EC:3.6.1.15	F	AT5G55280.1	homolog_of_bacterial_cytokinesis_Z-ring_protein_FTSZ_1-1
REFERENCE	evm.model.Ug_unitig_27.356	V-type proton atpase subunit e	EC:3.6.1.3;EC:7.1.2.1;EC:3.6.1.15	C	AT1G64200.1	vacuolar_H+-ATPase_subunit_E_isoform_3
REFERENCE	evm.model.Ug_unitig_27.290	DNA replication complex GINS protein PSF2	EC:3.6.1.3;EC:3.6.4.12;EC:3.6.1.15	L	AT3G12530.3	PSF2
REFERENCE	evm.model.Ug_unitig_27.281	Cell division cycle protein 48-like protein	EC:3.6.1.3;EC:3.6.1.15;EC:3.6.4.3	O	AT5G03340.1	ATPase%2C_AAA-type%2C_CDC48_protein
REFERENCE	evm.model.Ug_unitig_27.213	Guanylate-binding protein like	EC:3.6.1.15	L	AT5G46070.1	Guanylate-binding_family_protein
REFERENCE	evm.model.Ug_unitig_27.170	Nucleolar protein 10	EC:3.6.1.15	S	AT3G56990.1	embryo_sac_development_arrest_7
REFERENCE	evm.model.Ug_unitig_26.1410	Phospholipid-transporting ATPase	EC:3.6.1.3;EC:7.6.2.1;EC:3.6.1.15	P	AT1G68710.2	ATPase_E1-E2_type_family_protein_/_haloacid_dehalogenase-like_hydrolase_family_protein
REFERENCE	evm.model.Ug_unitig_26.1382	Ras-related protein Rab7	EC:3.6.1.15	U	AT3G18820.1	RAB_GTPase_homolog_G3F
REFERENCE	evm.model.Ug_unitig_26.1262	Serine/threonine-protein kinase	EC:2.7.11;EC:3.6.1.3;EC:5.99.1.3;EC:3.6.1.15	T	AT3G07070.1	Protein_kinase_superfamily_protein
REFERENCE	evm.model.Ug_unitig_26.1258	26S protease regulatory subunit 4-like protein	EC:3.6.1.3;EC:3.6.1.15	O	AT4G29040.1	regulatory_particle_AAA-ATPase_2A
REFERENCE	evm.model.Ug_unitig_26.1150	Rac-like GTP-binding protein 5	EC:3.6.1.15	S	AT4G35020.3	RAC-like_3
REFERENCE	evm.model.Ug_unitig_26.1138	Kinesin-like protein	EC:3.6.1.3;EC:3.6.1.15	Z	AT5G27550.2	P-loop_containing_nucleoside_triphosphate_hydrolases_superfamily_protein
REFERENCE	evm.model.Ug_unitig_26.1107	ras-related protein RABA1f-like	EC:3.6.1.15	U	AT5G60860.1	RAB_GTPase_homolog_A1F
REFERENCE	evm.model.Ug_unitig_26.1036	endoplasmin homolog	EC:3.6.1.3;EC:3.6.1.15	O	AT4G24190.1	Chaperone_protein_htpG_family_protein
REFERENCE	evm.model.Ug_unitig_26.994	V-type proton ATPase proteolipid subunit	EC:3.6.1.3;EC:7.1.2.1;EC:3.6.1.15	C	AT4G34720.2	ATPase%2C_F0/V0_complex%2C_subunit_C_protein
REFERENCE	evm.model.Ug_unitig_26.954	ATP-dependent zinc metalloprotease FTSH 5, mitochondrial	EC:3.4.24;EC:3.6.1.3;EC:3.6.1.15;EC:3.6.4.3	O	AT2G26140.1	FTSH_protease_4
REFERENCE	evm.model.Ug_unitig_26.939	GTP-binding nuclear protein	EC:3.6.1.15	U	AT5G55190.1	RAN_GTPase_3
REFERENCE	evm.model.Ug_unitig_26.797	Dynein light chain LC6, flagellar outer arm	EC:3.6.1.3;EC:3.6.1.15;EC:3.6.4.4	Z	AT5G20110.1	Dynein_light_chain_type_1_family_protein
REFERENCE	evm.model.Ug_unitig_26.724	Tubulin alpha chain	EC:3.6.1.15	Z	AT5G19780.1	tubulin_alpha-5
REFERENCE	evm.model.Ug_unitig_26.709	myosin-2-like isoform X2	EC:3.6.1.3;EC:3.6.1.15	Z	AT5G54280.2	myosin_2
REFERENCE	evm.model.Ug_unitig_26.626	Tubulin alpha chain	EC:3.6.1.15	Z	AT5G19780.1	tubulin_alpha-5
REFERENCE	evm.model.Ug_unitig_26.612	40S ribosomal protein S8	EC:3.6.1.15	J	AT5G59240.1	Ribosomal_protein_S8e_family_protein
REFERENCE	evm.model.Ug_unitig_26.594	ATP-dependent DNA helicase	EC:3.6.1.3;EC:3.6.4.12;EC:3.6.1.15	L	AT4G35740.2	DEAD/DEAH_box_RNA_helicase_family_protein
REFERENCE	evm.model.Ug_unitig_26.509	Kinesin-like protein	EC:3.6.1.3;EC:3.6.1.15	Z	AT1G01950.1	armadillo_repeat_kinesin_2
REFERENCE	evm.model.Ug_unitig_26.365	myosin-17-like isoform X1	EC:3.6.1.3;EC:3.6.1.15	Z	AT5G20490.2	myosin_family_protein_with_Dil
REFERENCE	evm.model.Ug_unitig_26.329	Calcium-transporting ATPase	EC:3.6.1.3;EC:7.2.2.10;EC:3.6.1.15	P	AT4G29900.2	autoinhibited_Ca(2+)-ATPase_10
REFERENCE	evm.model.Ug_unitig_26.80	probable purine permease 11 isoform X2	EC:3.6.1.15	S	AT1G44750.6	purine_permease_11
REFERENCE	evm.model.Ug_unitig_26.79	Ras-related protein RABH1b	EC:3.6.1.15	U	AT2G44610.1	Ras-related_small_GTP-binding_family_protein
REFERENCE	evm.model.Ug_unitig_26.77	CM0216.310.nc protein	EC:3.6.1.15	S	AT5G65960.1	GTP_binding_protein
REFERENCE	evm.model.Ug_unitig_26.48	pleiotropic drug resistance protein 2-like	EC:3.6.1.3;EC:3.6.1.15;EC:7.2.2.16	Q	AT1G66950.1	pleiotropic_drug_resistance_11
REFERENCE	evm.model.Ug_unitig_26.26	DUF21 domain-containing protein	EC:3.6.1.3;EC:3.6.1.15	S	AT5G50150.1	NEP-interacting_protein%2C_putative_(DUF239)
REFERENCE	evm.model.Ug_unitig_26.6	Dynein light chain, cytoplasmic	EC:3.6.1.3;EC:3.6.1.15;EC:3.6.4.4	Z	AT5G20110.1	Dynein_light_chain_type_1_family_protein
REFERENCE	evm.model.Ug_unitig_22.1537	Ras-related protein Rab7	EC:3.6.1.15	U	AT3G18820.1	RAB_GTPase_homolog_G3F
REFERENCE	evm.model.Ug_unitig_22.1525	DExH-box ATP-dependent RNA helicase DExH9	EC:3.6.1.3;EC:3.6.4.13;EC:3.6.1.15	A	AT1G59760.1	RNA_helicase%2C_ATP-dependent%2C_SK12/DOB1_protein
REFERENCE	evm.model.Ug_unitig_22.1440	Putative allantoinase	EC:3.6.1.3;EC:3.5.2.5;EC:3.6.1.15	F	AT4G04955.1	allantoinase
REFERENCE	evm.model.Ug_unitig_22.1361	Ribulose bisphosphate carboxylase/oxygenase activase 2, chloroplastic	EC:3.6.1.3;EC:3.6.1.15	O	AT2G39730.3	rubisco_activase
REFERENCE	evm.model.Ug_unitig_22.1254	DExH-box ATP-dependent RNA helicase DExH10	EC:3.6.1.3;EC:3.6.4.13;EC:3.6.1.15	A	AT2G06990.1	RNA_helicase%2C_ATP-dependent%2C_SK12/DOB1_protein
REFERENCE	evm.model.Ug_unitig_22.982	Reversibly glycosylated polypeptide family	EC:5.4.99.30;EC:3.6.1.15;EC:2.4.1.186	S	AT3G02230.1	reversibly_glycosylated_polypeptide_1
REFERENCE	evm.model.Ug_unitig_22.878	Dead-box atp-dependent rna helicase 3, chloroplastic	EC:3.6.1.3;EC:3.6.4.13;EC:3.6.1.15	A	AT5G26742.1	DEAD_box_RNA_helicase_(RH3)
REFERENCE	evm.model.Ug_unitig_22.860	stromal 70 kDa heat shock-related protein, chloroplastic	EC:3.6.1.3;EC:3.6.1.15	O	AT5G49910.1	chloroplast_heat_shock_protein_70-2
REFERENCE	evm.model.Ug_unitig_22.319	pre-rRNA-processing protein TSR1 homolog	EC:3.6.1.15	S	AT1G42440.1	pre-rRNA-processing_TSR1-like_protein
REFERENCE	evm.model.Ug_unitig_22.249	ATP-dependent helicase BRM	EC:3.6.1.3;EC:3.6.1.15	A	noTAIR	NULL
REFERENCE	evm.model.Ug_unitig_22.248	ATP-dependent helicase BRM	EC:3.6.1.3;EC:3.6.1.15	A	AT2G46020.4	transcription_regulatory_protein_SNF2
REFERENCE	evm.model.Ug_unitig_22.228	DNA topoisomerase 2	EC:3.6.1.3;EC:5.99.1.3;EC:3.6.1.15	B	AT3G23890.2	topoisomerase_II
REFERENCE	evm.model.Ug_unitig_22.224	RAP domain-containing protein, chloroplastic	EC:3.6.1.15	S	AT2G31890.1	RAP
REFERENCE	evm.model.Ug_unitig_22.218	Abc transporter g family member 11	EC:3.6.1.3;EC:3.6.3.25;EC:7.3.2.2;EC:7.3.2.3;EC:3.6.1.15	Q	AT1G17840.1	white-brown_complex-like_protein
REFERENCE	evm.model.Ug_unitig_22.181	V-type proton ATPase subunit F	EC:3.6.1.3;EC:3.6.1.15	C	AT4G02620.1	vacuolar_ATPase_subunit_F_family_protein
REFERENCE	evm.model.Ug_unitig_22.143	Midasin	EC:3.6.1.3;EC:3.6.1.15	S	AT1G67120.1	midasin-like_protein
REFERENCE	evm.model.Ug_unitig_22.140	fumarate hydratase 1, mitochondrial	EC:4.2.1.2;EC:3.6.1.15	C	AT2G47510.3	fumarase_1
REFERENCE	evm.model.Ug_unitig_21.920	ras-related protein RABE1c-like	EC:3.6.1.15	U	AT5G59840.1	Ras-related_small_GTP-binding_family_protein
REFERENCE	evm.model.Ug_unitig_21.910	Heat shock cognate 70 kDa protein 2-like	EC:3.6.1.3;EC:3.6.1.15	O	AT5G02500.1	heat_shock_cognate_protein_70-1
REFERENCE	evm.model.Ug_unitig_21.711	V-type proton ATPase subunit a	EC:7.1.3.1;EC:3.6.1.3;EC:7.1.2.1;EC:3.6.1.15	P	AT4G39080.1	vacuolar_proton_ATPase_A3
REFERENCE	evm.model.Ug_unitig_21.535	Kinesin-like protein	EC:3.6.1.3;EC:3.6.1.15;EC:3.6.4.4	Z	AT5G60930.3	P-loop_containing_nucleoside_triphosphate_hydrolases_superfamily_protein
REFERENCE	evm.model.Ug_unitig_21.389	Rna polymerase ii transcription factor b subunit 4	EC:2.7.11;EC:2.7.11.23;EC:3.6.1.3;EC:3.6.1.15	KL	AT1G18340.1	basal_transcription_factor_complex_subunit-like_protein
REFERENCE	evm.model.Ug_unitig_21.388	Ras-related small GTPase, Rho type	EC:3.6.1.15	S	AT3G48040.1	RHO-related_protein_from_plants_10
REFERENCE	evm.model.Ug_unitig_21.344	probable pre-mRNA-splicing factor ATP-dependent RNA helicase DEAH4 isoform X1	EC:3.6.1.3;EC:3.6.4.13;EC:3.6.1.15	A	AT1G27900.1	RNA_helicase_family_protein
REFERENCE	evm.model.Ug_unitig_21.297	Signal recognition particle 54 kDa protein	EC:3.6.1.15	S	noTAIR	NULL
REFERENCE	evm.model.Ug_unitig_21.206	Putative WD repeat-containing protein C2A9.03 isoform A	EC:3.6.1.3;EC:3.6.1.15;EC:3.6.4.3	S	AT3G13340.3	Transducin/WD40_repeat-like_superfamily_protein
REFERENCE	evm.model.Ug_unitig_21.178	Ras-related protein RABA1f	EC:3.6.1.15	U	AT5G60860.1	RAB_GTPase_homolog_A1F
REFERENCE	evm.model.Ug_unitig_21.66	ATP-dependent RNA helicase	EC:3.6.1.3;EC:3.6.1.15	none	AT1G53035.1	transmembrane_protein
REFERENCE	evm.model.Ug_unitig_21.16	Rac-like GTP-binding protein 5	EC:3.6.1.15	V	AT4G35020.3	RAC-like_3
REFERENCE	evm.model.Ug_unitig_9.4	26S proteasome regulatory complex, ATPase RPT4	EC:3.6.1.3;EC:3.6.1.15	O	AT1G45000.1	AAA-type_ATPase_family_protein
REFERENCE	evm.model.Ug_unitig_8.1882	Eukaryotic initiation factor 4a-14	EC:3.6.1.3;EC:3.6.1.15	A	AT3G13920.1	eukaryotic_translation_initiation_factor_4A1
REFERENCE	evm.model.Ug_unitig_8.1876	DEAD-box ATP-dependent RNA helicase 56	EC:3.6.1.3;EC:3.6.1.15	A	AT5G11200.1	DEAD/DEAH_box_RNA_helicase_family_protein
REFERENCE	evm.model.Ug_unitig_8.1868	Calcium-transporting ATPase	EC:3.6.1.3;EC:7.2.2.10;EC:3.6.1.15	P	AT1G27770.4	autoinhibited_Ca2+-ATPase_1
REFERENCE	evm.model.Ug_unitig_8.1808	ABC transporter G family member 22	EC:3.6.1.3;EC:3.6.1.15	Q	AT5G06530.2	ABC-2_type_transporter_family_protein
REFERENCE	evm.model.Ug_unitig_8.1626	elongation factor 2	EC:3.6.1.15	J	AT1G56070.3	Ribosomal_protein_S5/Elongation_factor_G/III/V_family_protein
REFERENCE	evm.model.Ug_unitig_8.1610	ras-related protein RABA5c-like	EC:3.6.1.15	U	AT2G31680.1	RAB_GTPase_homolog_A5D
REFERENCE	evm.model.Ug_unitig_8.1577	glutathione gamma-glutamylcysteinyltransferase 1-like isoform X1	EC:3.6.3.16;EC:3.6.1.3;EC:2.3.2.15;EC:3.6.1.15	P	AT5G44070.1	phytochelatin_synthase_1_(PCS1)
REFERENCE	evm.model.Ug_unitig_8.1157	Ras-related protein RABC2a	EC:3.6.1.15	U	AT5G03530.2	RAB_GTPase_homolog_C2A
REFERENCE	evm.model.Ug_unitig_8.1108	26S proteasome regulatory complex, ATPase RPT4	EC:3.6.1.3;EC:3.6.1.15	O	AT1G45000.1	AAA-type_ATPase_family_protein
REFERENCE	evm.model.Ug_unitig_8.1101	Kinesin-like protein	EC:3.6.1.3;EC:3.6.1.15;EC:3.6.4.4	Z	AT2G36200.1	P-loop_containing_nucleoside_triphosphate_hydrolases_superfamily_protein
REFERENCE	evm.model.Ug_unitig_8.886	ATP-dependent helicase BRM	EC:3.6.1.3;EC:3.6.1.15	A	AT2G46020.4	transcription_regulatory_protein_SNF2
REFERENCE	evm.model.Ug_unitig_8.871	DNA topoisomerase 2	EC:3.6.1.3;EC:5.99.1.3;EC:3.6.1.15	B	AT3G23890.2	topoisomerase_II
REFERENCE	evm.model.Ug_unitig_8.860	ABC transporter G family member 11	EC:3.6.1.3;EC:7.3.2.2;EC:3.6.1.15	Q	AT1G17840.1	white-brown_complex-like_protein
REFERENCE	evm.model.Ug_unitig_8.545	Ras-related protein Rab7	EC:3.6.1.15	U	AT3G18820.1	RAB_GTPase_homolog_G3F
REFERENCE	evm.model.Ug_unitig_8.418	cell division cycle protein 48 homolog	EC:3.6.1.3;EC:3.6.1.15;EC:3.6.4.3	O	AT5G03340.1	ATPase%2C_AAA-type%2C_CDC48_protein
REFERENCE	evm.model.Ug_unitig_8.417	Cell division cycle protein 48	EC:3.6.1.3;EC:3.6.1.15	O	AT5G03340.1	ATPase%2C_AAA-type%2C_CDC48_protein
REFERENCE	evm.model.Ug_unitig_8.366	Putative centromere-associated protein E-like	EC:3.6.1.3;EC:3.6.1.15	Z	AT4G39050.1	Kinesin_motor_family_protein
REFERENCE	evm.model.Ug_unitig_8.360	Kinesin-like protein	EC:3.6.1.3;EC:3.6.1.15	Z	AT3G43210.5	ATP_binding_microtubule_motor_family_protein
REFERENCE	evm.model.Ug_unitig_8.334	Phospholipid-transporting ATPase	EC:3.6.1.3;EC:7.6.2.1;EC:3.6.1.15	P	AT1G68710.2	ATPase_E1-E2_type_family_protein_/_haloacid_dehalogenase-like_hydrolase_family_protein
REFERENCE	evm.model.Ug_unitig_8.298	pre-mRNA-splicing factor ATP-dependent RNA helicase DEAH10	EC:3.6.1.3;EC:3.6.4.13;EC:3.6.1.15	A	AT1G26370.1	RNA_helicase_family_protein
REFERENCE	evm.model.Ug_unitig_8.151	UDP-arabinopyranose mutase 1	EC:5.4.99.30;EC:3.6.1.15	S	AT3G02230.1	reversibly_glycosylated_polypeptide_1
REFERENCE	evm.model.Ug_unitig_8.84	Dead-box atp-dependent rna helicase 3, chloroplastic	EC:3.6.1.3;EC:3.6.4.13;EC:3.6.1.15	A	AT5G26742.1	DEAD_box_RNA_helicase_(RH3)
REFERENCE	evm.model.Ug_unitig_8.81	pre-mRNA-splicing factor ATP-dependent RNA helicase DEAH1-like isoform X1	EC:3.6.1.3;EC:3.6.1.15	A	AT1G32490.1	RNA_helicase_family_protein
REFERENCE	evm.model.Ug_unitig_8.75	Stromal 70 kDa heat shock-related protein, chloroplastic	EC:3.6.1.3;EC:3.6.1.15	O	AT4G24280.1	chloroplast_heat_shock_protein_70-1
REFERENCE	evm.model.Ug_unitig_7.7	Kinesin-like protein	EC:3.6.1.15	Z	AT3G51150.4	ATP_binding_microtubule_motor_family_protein
REFERENCE	evm.model.Ug_unitig_5.2	Abc transporter c family member 9	EC:3.6.1.3;EC:7.6.2.2;EC:3.6.1.15	Q	AT3G60160.1	multidrug_resistance-associated_protein_9
REFERENCE	evm.model.Ug_unitig_5.1	Dynamin-related protein 1E-like	EC:3.6.1.15	U	AT3G60190.1	DYNAMIN-like_1E
REFERENCE	evm.model.Ug_unitig_0.2421	Dynamin-related protein 1E-like	EC:2.7.4.4;EC:2.7.4.22;EC:3.6.1.15;EC:2.7.4.14	U	AT3G60190.1	DYNAMIN-like_1E
REFERENCE	evm.model.Ug_unitig_0.2327	Ras-related protein RHN1	EC:3.6.1.15	U	AT5G45130.1	Ras_small_GTP-binding_family_protein
REFERENCE	evm.model.Ug_unitig_0.2290	Kinesin-like protein	EC:3.6.1.3;EC:3.6.1.15	Z	AT3G16630.2	P-loop_containing_nucleoside_triphosphate_hydrolases_superfamily_protein
REFERENCE	evm.model.Ug_unitig_0.2215	ras-related protein RABD2a-like	EC:3.6.1.15	U	AT1G02130.1	RAS_5
REFERENCE	evm.model.Ug_unitig_0.2182	Tubulin beta chain	EC:3.6.1.15	Z	AT5G23860.2	tubulin_beta_8
REFERENCE	evm.model.Ug_unitig_0.2092	Kinesin-like protein	EC:3.6.1.3;EC:3.6.1.15	Z	AT5G54670.2	kinesin_3
REFERENCE	evm.model.Ug_unitig_0.2083	Kinesin-like protein	EC:3.6.1.3;EC:3.6.1.15	Z	AT5G27550.2	P-loop_containing_nucleoside_triphosphate_hydrolases_superfamily_protein
REFERENCE	evm.model.Ug_unitig_0.1884	26S protease regulatory subunit 6B-like protein	EC:3.6.1.3;EC:3.6.1.15	O	AT5G58290.1	regulatory_particle_triple-A_ATPase_3
REFERENCE	evm.model.Ug_unitig_0.1718	DNA repair protein RAD50	EC:2.7.4.4;EC:2.7.4.3;EC:3.6.1.3;EC:3.6.1.15	L	AT2G31970.1	DNA_repair-recombination_protein_(RAD50)
REFERENCE	evm.model.Ug_unitig_0.1615	Tubulin alpha chain	EC:3.6.1.15	Z	noTAIR	NULL
REFERENCE	evm.model.Ug_unitig_0.1546	Kinesin-like protein kca2	EC:3.6.1.3;EC:3.6.4.5;EC:3.6.1.15	Z	AT5G10470.1	kinesin_like_protein_for_actin_based_chloroplast_movement_1
REFERENCE	evm.model.Ug_unitig_0.1453	ras-related protein RABB1b	EC:3.6.1.15	U	AT4G35860.1	GTP-binding_2
REFERENCE	evm.model.Ug_unitig_0.1418	Ras-related protein rabe1c	EC:3.1.4.12;EC:3.6.1.15	U	AT3G46060.3	RAB_GTPase_homolog_8A
REFERENCE	evm.model.Ug_unitig_0.1379	ABC transporter F family member 1-like	EC:3.6.1.3;EC:3.6.1.15	S	AT5G60790.1	ABC_transporter_family_protein
REFERENCE	evm.model.Ug_unitig_0.1362	Protein HIRA	EC:3.6.1.15	B	AT3G44530.4	histone_chaperone_HIRA-like_protein
REFERENCE	evm.model.Ug_unitig_0.1351	Aspartyl/glutamyl-tRNA (Asn/Gln) amidotransferase subunit B	EC:3.6.1.15	none	AT5G22210.2	aspartyl/glutamyl-tRNA_(Asn/Gln)_amidotransferase_subunit_B
REFERENCE	evm.model.Ug_unitig_0.1309	50S ribosomal protein L19, chloroplastic	EC:3.6.1.3;EC:3.6.1.15	J	AT4G11630.1	Ribosomal_protein_L19_family_protein
REFERENCE	evm.model.Ug_unitig_0.1274	Ras-related protein rgp1	EC:3.6.1.15	U	AT5G47960.1	RAB_GTPase_homolog_A4C
REFERENCE	evm.model.Ug_unitig_0.1181	DEAD-box ATP-dependent RNA helicase 8	EC:3.6.1.3;EC:3.6.4.13;EC:3.6.1.15	A	AT4G00660.2	RNAhelicase-like_8
REFERENCE	evm.model.Ug_unitig_0.1142	Abc transporter g family member 11	EC:3.6.1.3;EC:3.6.3.25;EC:7.3.2.2;EC:7.3.2.3;EC:3.6.1.15	Q	AT1G17840.1	white-brown_complex-like_protein
REFERENCE	evm.model.Ug_unitig_0.1056	V-type proton ATPase subunit H	EC:3.6.1.3;EC:7.1.2.1;EC:3.6.1.15	C	AT3G42050.1	vacuolar_ATP_synthase_subunit_H_family_protein
REFERENCE	evm.model.Ug_unitig_0.1040	Katanin p60 ATPase-containing subunit A1	EC:3.6.1.3;EC:3.6.1.15;EC:3.6.4.3	O	AT1G80350.1	P-loop_containing_nucleoside_triphosphate_hydrolases_superfamily_protein
REFERENCE	evm.model.Ug_unitig_0.955	Elongation factor 1-alpha	EC:3.6.1.15	J	AT5G60390.3	GTP_binding_Elongation_factor_Tu_family_protein
REFERENCE	evm.model.Ug_unitig_0.953	Elongation factor 1-alpha	EC:3.6.1.15	J	AT5G60390.3	GTP_binding_Elongation_factor_Tu_family_protein
REFERENCE	evm.model.Ug_unitig_0.951	Elongation factor 1-alpha	EC:3.6.1.15	J	AT5G60390.3	GTP_binding_Elongation_factor_Tu_family_protein
REFERENCE	evm.model.Ug_unitig_0.950	Elongation factor 1-alpha	EC:3.6.1.15	J	AT5G60390.3	GTP_binding_Elongation_factor_Tu_family_protein
REFERENCE	evm.model.Ug_unitig_0.927	Cation-transporting ATPase	EC:3.6.1.3;EC:7.2.2.10;EC:3.6.1.15	P	AT5G23630.1	phosphate_deficiency_response_2
REFERENCE	evm.model.Ug_unitig_0.919	Elongation factor Tu	EC:3.6.1.15	J	AT4G02930.1	GTP_binding_Elongation_factor_Tu_family_protein
REFERENCE	evm.model.Ug_unitig_0.816	Dynamin-related protein 3A-like	EC:3.6.1.15	U	AT4G33650.2	dynamin-related_protein_3A
REFERENCE	evm.model.Ug_unitig_0.815	heat shock 70 kDa protein, mitochondrial	EC:3.6.1.3;EC:3.6.1.15	O	AT5G09590.1	mitochondrial_HSO70_2
REFERENCE	evm.model.Ug_unitig_0.813	heat shock 70 kDa protein, mitochondrial	EC:1.3.1.74;EC:3.6.1.3;EC:3.6.1.15	O	AT5G09590.1	mitochondrial_HSO70_2
REFERENCE	evm.model.Ug_unitig_0.728	Elongation factor Tu	EC:3.6.1.15	J	AT4G20360.2	RAB_GTPase_homolog_E1B
REFERENCE	evm.model.Ug_unitig_0.691	DExH-box ATP-dependent RNA helicase DExH6-like	EC:3.6.1.3;EC:3.6.1.15	A	AT2G30800.1	helicase_in_vascular_tissue_and_tapetum
REFERENCE	evm.model.Ug_unitig_0.558	probable DNA helicase MCM9	EC:3.6.1.3;EC:3.6.1.15	L	AT2G14050.2	minichromosome_maintenance_9
REFERENCE	evm.model.Ug_unitig_0.519	AAA+-type ATPase	EC:3.6.1.3;EC:3.6.1.15	O	AT5G57480.1	P-loop_containing_nucleoside_triphosphate_hydrolases_superfamily_protein
REFERENCE	evm.model.Ug_unitig_0.430	uncharacterized GTP-binding protein At5g64813	EC:3.6.1.15	U	AT5G64813.3	Ras-related_small_GTP-binding_family_protein
REFERENCE	evm.model.Ug_unitig_0.330	Plasma membrane ATPase	EC:3.6.1.3;EC:7.1.2.1;EC:3.6.1.15	P	AT2G07560.1	H[+]-ATPase_6
REFERENCE	evm.model.Ug_unitig_0.297	ATPase family AAA domain-containing protein 1-like	EC:3.6.1.3;EC:3.6.1.15;EC:3.6.4.3	O	AT4G27680.1	P-loop_containing_nucleoside_triphosphate_hydrolases_superfamily_protein
REFERENCE	evm.model.Ug_unitig_0.270	ABC transporter G family member 12	EC:3.6.1.3;EC:7.3.2.5;EC:7.3.2.2;EC:3.6.1.15	Q	AT1G51500.1	ABC-2_type_transporter_family_protein
REFERENCE	evm.model.Ug_unitig_0.240	ABC transporter I family member 6, chloroplastic-like	EC:3.6.1.3;EC:7.6.2.11;EC:7.4.2.5;EC:7.4.2.6;EC:3.6.1.15	Q	AT3G10670.1	non-intrinsic_ABC_protein_7
REFERENCE	evm.model.Ug_unitig_0.64	phragmoplast orienting kinesin 2	EC:3.6.1.3;EC:3.6.1.15	Z	AT3G19050.1	phragmoplast_orienting_kinesin_2
REFERENCE	evm.model.Ug_unitig_0.56	guanine nucleotide-binding protein subunit beta-2	EC:3.6.1.15	S	AT4G34460.1	GTP_binding_protein_beta_1
[OVER]	EC:3.6.1.3	2.863042553355139E-8	2.1462088106110486E-11	350	227	8016	9167
TEST	evm.model.Ug_unitig_899.1154	DNA gyrase subunit B	EC:3.6.1.3;EC:5.99.1.3;EC:3.6.1.15	B	AT5G04130.1	DNA_GYRASE_B2
TEST	evm.model.Ug_unitig_899.1083	AAA+ ATPase domain-containing protein	EC:3.6.1.3;EC:3.6.1.15	O	AT3G15120.2	P-loop_containing_nucleoside_triphosphate_hydrolases_superfamily_protein
TEST	evm.model.Ug_unitig_899.1033	ABC transporter B family member 19	EC:3.6.1.3;EC:7.6.2.2;EC:3.6.1.15	Q	AT3G28860.1	ATP_binding_cassette_subfamily_B19
TEST	evm.model.Ug_unitig_899.1008	Phospholipid-transporting ATPase	EC:3.6.1.3;EC:7.6.2.1;EC:3.6.1.15	P	AT3G27870.1	ATPase_E1-E2_type_family_protein_/_haloacid_dehalogenase-like_hydrolase_family_protein
TEST	evm.model.Ug_unitig_899.957	DNA mismatch repair protein MSH7 isoform X1	EC:3.6.1.3;EC:3.6.1.15	L	AT3G24495.1	MUTS_homolog_7
TEST	evm.model.Ug_unitig_899.948	Kinesin-like protein	EC:3.6.1.3;EC:3.6.1.15;EC:3.6.4.4	Z	AT1G20060.9	ATP_binding_microtubule_motor_family_protein
TEST	evm.model.Ug_unitig_899.947	Kinesin-like protein	EC:3.6.1.3;EC:3.6.1.15;EC:3.6.4.4	Z	AT1G20060.3	ATP_binding_microtubule_motor_family_protein
TEST	evm.model.Ug_unitig_899.904	V-type proton ATPase subunit E	EC:3.6.1.3;EC:7.1.2.1;EC:3.6.1.15	C	AT4G11150.1	vacuolar_ATP_synthase_subunit_E1
TEST	evm.model.Ug_unitig_899.804	ABC transporter C family member 3	EC:3.6.1.3;EC:7.6.2.2;EC:3.6.1.15	Q	AT3G13080.1	multidrug_resistance-associated_protein_3
TEST	evm.model.Ug_unitig_899.664	Putative inactive ATP-dependent zinc metalloprotease FTSHI 3, chloroplastic	EC:3.4.24;EC:3.6.1.3;EC:3.6.1.15	O	AT3G02450.1	cell_division_protein_ftsH
TEST	evm.model.Ug_unitig_899.635	putative SWI/SNF-related matrix-associated actin-dependent regulator of chromatin subfamily A member 3-like 1	EC:3.6.1.3;EC:3.6.1.15	A	AT5G05130.1	DNA/RNA_helicase_protein
TEST	evm.model.Ug_unitig_899.560	Abc transporter d family member 1	EC:3.6.1.3;EC:3.6.3.47;EC:3.6.1.15	Q	AT4G39850.4	peroxisomal_ABC_transporter_1
TEST	evm.model.Ug_unitig_899.485	ABC transporter G family member 28-like	EC:3.6.1.3;EC:7.6.2.2;EC:3.6.1.15;EC:3.6.3.17	Q	AT5G60740.1	ABC_transporter_family_protein
TEST	evm.model.Ug_unitig_899.419	Dead-box atp-dependent rna helicase 13	EC:3.6.1.3;EC:3.6.4.13;EC:3.6.1.15	A	AT3G16840.1	P-loop_containing_nucleoside_triphosphate_hydrolases_superfamily_protein
TEST	evm.model.Ug_unitig_899.374	DEAD-box ATP-dependent RNA helicase 31-like	EC:3.6.1.3;EC:3.6.4.13;EC:3.6.1.15	A	AT5G63630.2	P-loop_containing_nucleoside_triphosphate_hydrolases_superfamily_protein
TEST	evm.model.Ug_unitig_899.372	Angiotensin-converting enzyme 2	EC:3.6.1.3;EC:3.6.1.15	S	AT3G61700.3	helicase_with_zinc_finger_protein
TEST	evm.model.Ug_unitig_899.167	DEAD-box ATP-dependent RNA helicase 16	EC:3.6.1.3;EC:3.6.4.13;EC:3.6.1.15	A	AT4G34910.1	P-loop_containing_nucleoside_triphosphate_hydrolases_superfamily_protein
TEST	evm.model.Ug_unitig_899.141	ATP-dependent RNA helicase DEAH11, chloroplastic-like	EC:3.6.1.3;EC:3.6.1.15	A	AT5G10370.1	helicase_domain-containing_protein_/_IBR_domain-containing_protein_/_zinc_finger_protein-like_protein
TEST	evm.model.Ug_unitig_899.76	RNA helicase	EC:3.6.1.3;EC:3.6.4.13;EC:3.6.1.15	A	AT2G28600.1	P-loop_containing_nucleoside_triphosphate_hydrolases_superfamily_protein
TEST	evm.model.Ug_unitig_899.75	Pleiotropic drug resistance protein 2	EC:3.6.1.3;EC:3.6.1.15	Q	AT2G36380.1	pleiotropic_drug_resistance_6
TEST	evm.model.Ug_unitig_749.976	DEAD-box ATP-dependent RNA helicase 42	EC:3.6.1.3;EC:3.6.4.13;EC:3.6.1.15	A	AT1G20920.7	P-loop_containing_nucleoside_triphosphate_hydrolases_superfamily_protein
TEST	evm.model.Ug_unitig_749.943	myosin-17-like isoform X1	EC:3.6.1.3;EC:3.6.1.15	Z	AT5G20490.3	myosin_family_protein_with_Dil
TEST	evm.model.Ug_unitig_749.894	probable DEAD-box ATP-dependent RNA helicase 48	EC:3.6.1.3;EC:3.6.1.15	A	AT2G37920.1	copper_ion_transmembrane_transporter
TEST	evm.model.Ug_unitig_749.815	cell division control protein 48 homolog C-like	EC:3.6.1.3;EC:3.6.1.15	O	AT3G01610.2	cell_division_cycle_48C
TEST	evm.model.Ug_unitig_749.801	protein argonaute 10-like	EC:3.6.1.3;EC:3.6.1.15	J	AT5G43810.4	Stabilizer_of_iron_transporter_SufD_/_Polynucleotidyl_transferase
TEST	evm.model.Ug_unitig_749.786	Putative atp-dependent dna helicase chr12	EC:3.6.1.3;EC:3.6.1.15	A	AT3G06010.1	SNF2/Brahma-type_chromatin-remodeling_protein_CHR12
TEST	evm.model.Ug_unitig_749.734	ATP-dependent DNA helicase MER3-like protein	EC:3.6.1.3;EC:3.6.4.12;EC:3.6.4.13;EC:3.6.1.15	A	AT3G27730.7	DNA_helicase_ROCK-N-ROLLERS
TEST	evm.model.Ug_unitig_749.558	ABC transporter C family member 2-like	EC:1.3.1.74;EC:3.6.1.3;EC:3.6.1.15	Q	AT1G30410.6	multidrug_resistance-associated_protein_13
TEST	evm.model.Ug_unitig_749.557	DNA damage-binding protein 1	EC:3.6.1.3;EC:3.6.1.15	L	AT4G05420.1	damaged_DNA_binding_protein_1A
TEST	evm.model.Ug_unitig_748.1450	protein HYPER-SENSITIVITY-RELATED 4-like	EC:3.6.1.3;EC:3.6.1.15	O	AT3G50930.1	cytochrome_BC1_synthesi
TEST	evm.model.Ug_unitig_748.1336	Putative copper-transporting ATPase HMA5	EC:3.6.1.3;EC:7.2.2.10;EC:3.6.1.15	P	AT1G63440.1	heavy_metal_atpase_5
TEST	evm.model.Ug_unitig_748.1279	ABC transporter G family member 11-like	EC:3.6.1.3;EC:7.3.2.2;EC:3.6.1.15	Q	AT1G17840.1	white-brown_complex-like_protein
TEST	evm.model.Ug_unitig_748.1188	Calcium-transporting ATPase	EC:3.6.1.3;EC:7.2.2.10;EC:3.6.1.15	P	AT4G37640.1	calcium_ATPase_2
TEST	evm.model.Ug_unitig_748.1177	ISWI chromatin-remodeling complex ATPase CHR11	EC:3.6.1.3;EC:3.6.1.15	K	AT5G18620.2	chromatin_remodeling_factor17
TEST	evm.model.Ug_unitig_748.1067	ABC transporter B family member 2-like	EC:3.6.1.3;EC:7.6.2.2;EC:3.6.1.15	Q	AT4G25960.1	P-glycoprotein_2
TEST	evm.model.Ug_unitig_748.1055	ABC transporter F family member 3	EC:3.6.1.3;EC:3.6.1.15	EJ	AT1G64550.1	general_control_non-repressible_3
TEST	evm.model.Ug_unitig_748.975	ATP-dependent DNA helicase	EC:3.6.1.3;EC:3.6.4.12;EC:3.6.1.15	L	AT1G31360.1	RECQ_helicase_L2
TEST	evm.model.Ug_unitig_748.916	DEAD-box ATP-dependent RNA helicase 20 isoform X1	EC:3.6.1.3;EC:3.6.1.15	A	AT1G55150.1	DEA(D/H)-box_RNA_helicase_family_protein
TEST	evm.model.Ug_unitig_748.893	Calcium-transporting ATPase	EC:3.6.1.3;EC:7.2.2.10;EC:3.6.1.15	P	AT3G21180.1	autoinhibited_Ca(2+)-ATPase_9
TEST	evm.model.Ug_unitig_748.892	Calcium-transporting ATPase	EC:3.6.1.3;EC:7.2.2.10;EC:3.6.1.15	P	AT3G21180.1	autoinhibited_Ca(2+)-ATPase_9
TEST	evm.model.Ug_unitig_748.725	Abc transporter c family member 2	EC:3.6.3.16;EC:3.6.1.3;EC:7.6.2.2;EC:3.6.1.15	Q	AT2G34660.2	multidrug_resistance-associated_protein_2
TEST	evm.model.Ug_unitig_748.644	ATP-dependent zinc metalloprotease FTSH, chloroplastic	EC:3.4.24;EC:3.6.1.3;EC:3.6.1.15	O	AT5G42270.1	FtsH_extracellular_protease_family
TEST	evm.model.Ug_unitig_748.629	Peroxisome biogenesis protein 1	EC:3.6.1.3;EC:3.6.1.15	O	AT5G08470.1	peroxisome_1
TEST	evm.model.Ug_unitig_748.583	ATP-dependent zinc metalloprotease FTSH 12, chloroplastic	EC:3.4.24;EC:3.6.1.3;EC:3.6.3.52;EC:7.4.2.5;EC:3.6.1.15;EC:3.6.4.3	O	AT1G79560.1	FTSH_protease_12
TEST	evm.model.Ug_unitig_748.528	myosin-15 isoform X1	EC:3.6.1.3;EC:3.6.1.15	Z	AT4G33200.1	myosin
TEST	evm.model.Ug_unitig_748.452	V-type proton ATPase catalytic subunit A	EC:3.6.1.3;EC:7.1.2.1;EC:3.6.1.15	C	AT1G78900.2	vacuolar_ATP_synthase_subunit_A
TEST	evm.model.Ug_unitig_748.346	endonuclease MutS2-like isoform X1	EC:3.6.1.3;EC:3.6.1.15	L	AT5G54090.1	DNA_mismatch_repair_protein_MutS%2C_type_2
TEST	evm.model.Ug_unitig_748.265	kinesin-like calmodulin-binding protein	EC:3.6.1.3;EC:3.6.4.5;EC:3.6.1.15	Z	AT5G65930.2	kinesin-like_calmodulin-binding_protein_(ZWICHEL)
TEST	evm.model.Ug_unitig_748.218	Plasma membrane ATPase	EC:3.6.1.3;EC:7.1.2.1;EC:6.1.1.6;EC:3.6.1.15	P	AT4G30190.1	H[+]-ATPase_2
TEST	evm.model.Ug_unitig_748.163	PDR protein 5	EC:3.6.1.3;EC:3.6.1.15	Q	AT2G26910.1	pleiotropic_drug_resistance_4
TEST	evm.model.Ug_unitig_748.143	ABC transporter C family member 9	EC:3.6.1.3;EC:7.6.2.2;EC:3.6.1.15	Q	AT3G60160.1	multidrug_resistance-associated_protein_9
TEST	evm.model.Ug_unitig_747.836	Vesicle-fusing ATPase	EC:3.6.1.3;EC:3.6.1.15	O	AT4G04910.1	AAA-type_ATPase_family_protein
TEST	evm.model.Ug_unitig_747.825	RuvB-like helicase	EC:3.6.1.3;EC:3.6.4.12;EC:3.6.1.15	L	AT5G22330.1	P-loop_containing_nucleoside_triphosphate_hydrolases_superfamily_protein
TEST	evm.model.Ug_unitig_747.758	ABC transporter G family member 14	EC:3.6.1.3;EC:3.6.1.15	Q	AT1G31770.1	ATP-binding_cassette_14
TEST	evm.model.Ug_unitig_747.702	AAA+-type ATPase	EC:3.6.1.3;EC:3.6.1.15;EC:3.6.4.3	O	AT4G28000.1	P-loop_containing_nucleoside_triphosphate_hydrolases_superfamily_protein
TEST	evm.model.Ug_unitig_747.699	Abc transporter c family member 10	EC:1.3.1.74;EC:3.6.1.3;EC:7.6.2.2;EC:3.6.1.15	Q	AT3G59140.1	multidrug_resistance-associated_protein_14
TEST	evm.model.Ug_unitig_747.632	Dna mismatch repair protein mlh3	EC:3.6.1.3;EC:3.6.1.15	L	AT4G35520.3	MUTL_protein_homolog_3
TEST	evm.model.Ug_unitig_747.597	ABC transporter F family member 5	EC:3.6.1.3;EC:3.6.1.15	S	AT5G64840.1	general_control_non-repressible_5
TEST	evm.model.Ug_unitig_747.556	kinesin-like protein KIN12B	EC:3.6.1.3;EC:3.6.1.15;EC:3.6.4.4	Z	AT4G14150.1	phragmoplast-associated_kinesin-related_protein_1
TEST	evm.model.Ug_unitig_747.529	MSH1 (Fragment)	EC:3.6.1.3;EC:3.6.1.15	L	AT3G24320.2	MUTL_protein_homolog_1
TEST	evm.model.Ug_unitig_747.252	Phospholipid-transporting ATPase	EC:3.6.1.3;EC:7.6.2.1;EC:3.6.1.15	P	AT5G04930.1	aminophospholipid_ATPase_1
TEST	evm.model.Ug_unitig_747.246	DEAD-box ATP-dependent RNA helicase 5	EC:3.6.1.3;EC:3.6.4.13;EC:2.3.1.225;EC:3.6.1.15	A	AT1G31970.1	DEA(D/H)-box_RNA_helicase_family_protein
TEST	evm.model.Ug_unitig_747.228	ATP-dependent DNA helicase	EC:3.6.1.3;EC:3.6.4.12;EC:3.6.1.15	L	AT3G05740.1	RECQ_helicase_l1
TEST	evm.model.Ug_unitig_747.227	Kinesin-like protein	EC:3.6.1.3;EC:3.6.4.5;EC:3.6.1.15	Z	AT2G47500.1	P-loop_nucleoside_triphosphate_hydrolases_superfamily_protein_with_CH_(Calponin_Homology)_domain-containing_protein
TEST	evm.model.Ug_unitig_747.38	putative ABC transporter C family member 15	EC:7.6.2.3;EC:3.6.1.3;EC:7.6.2.2;EC:3.6.1.15	Q	AT3G13080.1	multidrug_resistance-associated_protein_3
TEST	evm.model.Ug_unitig_746.303	DExH-box ATP-dependent RNA helicase	EC:3.6.1.3;EC:3.6.4.13;EC:3.6.1.15	A	AT1G48650.1	DEA(D/H)-box_RNA_helicase_family_protein
TEST	evm.model.Ug_unitig_746.293	Phospholipid-transporting ATPase	EC:3.6.1.3;EC:7.6.2.1;EC:3.6.1.15	P	AT5G04930.1	aminophospholipid_ATPase_1
TEST	evm.model.Ug_unitig_746.292	Phospholipid-transporting ATPase	EC:3.6.1.3;EC:7.6.2.1;EC:3.6.1.15	P	AT5G04930.1	aminophospholipid_ATPase_1
TEST	evm.model.Ug_unitig_746.243	DEAD-box ATP-dependent RNA helicase 37-like	EC:3.6.1.3;EC:3.6.4.13;EC:3.6.1.15	A	AT2G42520.3	P-loop_containing_nucleoside_triphosphate_hydrolases_superfamily_protein
TEST	evm.model.Ug_unitig_744.634	ABC transporter G family member 20-like	EC:3.6.1.3;EC:3.6.1.15	Q	AT2G37360.1	ABC-2_type_transporter_family_protein
TEST	evm.model.Ug_unitig_744.482	Obg-like ATPase 1	EC:3.6.1.3;EC:3.6.1.15	J	AT1G56050.1	GTP-binding_protein-like_protein
TEST	evm.model.Ug_unitig_744.463	Calcium-transporting ATPase	EC:3.6.1.3;EC:7.1.2.1;EC:7.2.2.10;EC:3.6.1.15;EC:7.2.2.5	P	AT1G10130.1	endoplasmic_reticulum-type_calcium-transporting_ATPase_3
TEST	evm.model.Ug_unitig_744.458	DNA mismatch repair protein MSH4	EC:3.6.1.3;EC:3.6.1.15	L	AT4G17380.1	MUTS-like_protein_4
TEST	evm.model.Ug_unitig_744.440	V-type proton ATPase subunit c1	EC:3.6.1.3;EC:7.1.2.1;EC:3.6.1.15	P	AT4G32530.1	ATPase%2C_F0/V0_complex%2C_subunit_C_protein
TEST	evm.model.Ug_unitig_744.435	probable ATP-dependent DNA helicase DDX11	EC:3.6.1.3;EC:3.6.1.15	L	AT1G79890.4	RAD3-like_DNA-binding_helicase_protein
TEST	evm.model.Ug_unitig_744.434	probable ATP-dependent DNA helicase DDX11	EC:3.6.1.3;EC:3.6.4.12;EC:3.6.1.15	L	AT1G79890.1	RAD3-like_DNA-binding_helicase_protein
TEST	evm.model.Ug_unitig_744.425	Lon protease homolog 2, peroxisomal	EC:3.4.21;EC:3.6.1.3;EC:3.6.1.15	O	AT5G47040.1	lon_protease_2
TEST	evm.model.Ug_unitig_744.422	DEAD-box ATP-dependent RNA helicase 10	EC:3.6.1.3;EC:3.6.4.13;EC:3.6.1.15	A	AT5G60990.1	DEA(D/H)-box_RNA_helicase_family_protein
TEST	evm.model.Ug_unitig_736.508	Phospholipid-transporting ATPase	EC:3.6.1.3;EC:7.6.2.1;EC:3.6.1.15	P	AT5G04930.1	aminophospholipid_ATPase_1
TEST	evm.model.Ug_unitig_736.506	ATP-dependent Clp protease proteolytic subunit	EC:3.4.21;EC:3.6.1.3;EC:3.6.1.15	O	AT5G45390.1	CLP_protease_P4
TEST	evm.model.Ug_unitig_736.460	ABC transporter G family member 5-like	EC:3.6.1.3;EC:3.6.1.15	Q	AT2G13610.1	ABC-2_type_transporter_family_protein
TEST	evm.model.Ug_unitig_736.298	Dead-box atp-dependent rna helicase 58, chloroplastic	EC:3.6.1.3;EC:3.6.4.13;EC:3.6.1.15	A	AT5G19210.2	P-loop_containing_nucleoside_triphosphate_hydrolases_superfamily_protein
TEST	evm.model.Ug_unitig_736.216	Abc transporter g family member 3	EC:3.6.1.3;EC:3.6.3.25;EC:7.3.2.2;EC:7.3.2.3;EC:3.6.1.15	Q	AT2G28070.2	ABC-2_type_transporter_family_protein
TEST	evm.model.Ug_unitig_736.156	DExH-box ATP-dependent RNA helicase DExH18, mitochondrial-like	EC:3.4.21;EC:3.6.1.3;EC:3.6.4.12;EC:3.6.4.13;EC:3.6.1.15	A	AT5G39840.1	ATP-dependent_RNA_helicase
TEST	evm.model.Ug_unitig_736.133	RNA helicase	EC:3.6.1.3;EC:3.6.4.13;EC:3.6.1.15	A	AT2G28600.1	P-loop_containing_nucleoside_triphosphate_hydrolases_superfamily_protein
TEST	evm.model.Ug_unitig_736.100	PDR protein 5	EC:3.6.1.3;EC:3.6.1.15	Q	AT2G26910.1	pleiotropic_drug_resistance_4
TEST	evm.model.Ug_unitig_736.53	ABC transporter B family member 1	EC:3.6.1.3;EC:7.6.2.2;EC:3.6.1.15	Q	AT3G28860.1	ATP_binding_cassette_subfamily_B19
TEST	evm.model.Ug_unitig_699.644	fidgetin-like protein 1	EC:3.6.1.3;EC:3.6.1.15;EC:3.6.4.3	O	AT3G27120.1	P-loop_containing_nucleoside_triphosphate_hydrolases_superfamily_protein
TEST	evm.model.Ug_unitig_699.642	Replication factor C subunit 1	EC:3.6.1.3;EC:3.6.1.15	L	AT5G22010.1	replication_factor_C1
TEST	evm.model.Ug_unitig_699.497	ATPase WRNIP1	EC:3.6.1.3;EC:3.6.1.15	O	AT1G24290.1	AAA-type_ATPase_family_protein
TEST	evm.model.Ug_unitig_699.150	putative SWI/SNF-related matrix-associated actin-dependent regulator of chromatin subfamily A member 3-like 2 isoform X1	EC:3.6.1.3;EC:3.6.1.15	KL	AT5G22750.1	DNA/RNA_helicase_protein
TEST	evm.model.Ug_unitig_699.145	V-type proton ATPase subunit E	EC:3.6.1.3;EC:7.1.2.1;EC:3.6.1.15	C	AT4G11150.1	vacuolar_ATP_synthase_subunit_E1
TEST	evm.model.Ug_unitig_699.120	Protein CHROMATIN REMODELING 5	EC:3.6.1.3;EC:3.6.1.15	K	AT2G13370.3	chromatin_remodeling_5
TEST	evm.model.Ug_unitig_699.29	helicase-like transcription factor CHR28 isoform X1	EC:3.6.1.3;EC:3.6.4.12;EC:3.6.1.15	L	AT1G50410.3	SNF2_domain-containing_protein_/_helicase_domain-containing_protein_/_zinc_finger_protein-like_protein
TEST	evm.model.Ug_unitig_578.681	ABC transporter I family member 19-like	EC:3.6.1.3;EC:7.4.2.5;EC:3.6.1.15	K	AT1G03905.1	P-loop_containing_nucleoside_triphosphate_hydrolases_superfamily_protein
TEST	evm.model.Ug_unitig_578.616	DExH-box ATP-dependent RNA helicase DExH1 isoform X1	EC:3.6.1.3;EC:3.6.4.13;EC:3.6.1.15	A	AT2G35920.1	RNA_helicase_family_protein
TEST	evm.model.Ug_unitig_578.486	DEAD-box ATP-dependent RNA helicase 39	EC:3.6.1.3;EC:3.6.4.13;EC:3.6.1.15	A	AT4G09730.1	RH39
TEST	evm.model.Ug_unitig_578.331	DEA(D/H)-box RNA helicase family protein	EC:3.6.1.3;EC:3.6.4.13;EC:3.6.1.15	A	AT1G59990.2	DEA(D/H)-box_RNA_helicase_family_protein
TEST	evm.model.Ug_unitig_578.279	DNA mismatch repair	EC:3.6.1.3;EC:3.6.1.15	L	AT3G20475.1	MUTS-homologue_5
TEST	evm.model.Ug_unitig_578.270	Pentatricopeptide repeat-containing protein	EC:3.6.1.3;EC:3.6.1.15	S	AT2G41720.1	Tetratricopeptide_repeat_(TPR)-like_superfamily_protein
TEST	evm.model.Ug_unitig_578.244	Atp-dependent dna helicase 2 subunit ku70	EC:3.6.1.3;EC:3.6.4.12;EC:3.6.1.15	L	AT1G16970.1	ATP-dependent_DNA_helicase_2_subunit_Ku70-like_protein
TEST	evm.model.Ug_unitig_578.173	Kinesin-like protein	EC:3.6.1.3;EC:3.6.1.15	Z	AT3G43210.5	ATP_binding_microtubule_motor_family_protein
TEST	evm.model.Ug_unitig_578.172	Kinesin-like protein	EC:3.6.1.3;EC:3.6.1.15	Z	AT3G43210.5	ATP_binding_microtubule_motor_family_protein
TEST	evm.model.Ug_unitig_578.171	Kinesin-like protein	EC:3.6.1.3;EC:3.6.1.15	Z	AT3G43210.5	ATP_binding_microtubule_motor_family_protein
TEST	evm.model.Ug_unitig_578.37	Putative DNA helicase MCM8	EC:3.6.1.3;EC:3.6.1.15	L	AT3G09660.3	minichromosome_maintenance_8
TEST	evm.model.Ug_unitig_130.19	Regulator of rDNA transcription protein 15	EC:3.6.1.3;EC:3.2.1.24;EC:3.6.1.15	G	noTAIR	NULL
TEST	evm.model.Ug_unitig_92.193	ABC transporter G family member 8	EC:3.6.1.3;EC:7.5.2.2;EC:7.5.2.1;EC:3.6.1.15	Q	AT5G52860.1	ABC-2_type_transporter_family_protein
TEST	evm.model.Ug_unitig_92.160	primase homolog protein-like isoform X1	EC:3.6.1.3;EC:3.6.4.12;EC:3.6.1.15	L	AT1G30660.3	nucleic_acid_binding_protein
TEST	evm.model.Ug_unitig_92.154	Kinesin-like protein kin12b	EC:3.6.1.3;EC:3.6.1.15;EC:3.6.4.4	Z	AT3G23670.1	phragmoplast-associated_kinesin-related_protein
TEST	evm.model.Ug_unitig_90.17	Protein translocase subunit SecA	EC:3.6.1.3;EC:7.4.2.3;EC:7.4.2.4;EC:7.4.2.5;EC:3.6.1.15	C	AT4G01800.3	Albino_or_Glassy_Yellow_1
TEST	evm.model.Ug_unitig_90.16	Protein translocase subunit SecA	EC:3.6.1.3;EC:7.4.2.3;EC:7.4.2.4;EC:7.4.2.5;EC:3.6.1.15	C	AT4G01800.3	Albino_or_Glassy_Yellow_1
TEST	evm.model.Ug_unitig_90.15	ABC transporter B family member 21-like	EC:3.6.1.3;EC:7.6.2.2;EC:3.6.1.15	Q	AT3G62150.3	P-glycoprotein_21
TEST	evm.model.Ug_unitig_88.209	pleiotropic drug resistance protein 2-like	EC:3.6.1.3;EC:3.6.1.15;EC:7.2.2.16	Q	AT1G66950.1	pleiotropic_drug_resistance_11
TEST	evm.model.Ug_unitig_88.113	Dynein light chain	EC:3.6.1.3;EC:3.6.1.15;EC:3.6.4.4	Z	AT4G15930.1	Dynein_light_chain_type_1_family_protein
TEST	evm.model.Ug_unitig_88.20	Cation transport ATPase	EC:3.6.1.3;EC:7.2.2.10;EC:3.6.1.15	P	AT1G63440.1	heavy_metal_atpase_5
TEST	evm.model.Ug_unitig_88.5	Phospholipid-transporting ATPase	EC:3.6.1.3;EC:7.6.2.1;EC:3.6.1.15	P	AT1G17500.2	ATPase_E1-E2_type_family_protein_/_haloacid_dehalogenase-like_hydrolase_family_protein
TEST	evm.model.Ug_unitig_85.116	myosin-6-like isoform X1	EC:3.6.1.3;EC:3.6.1.15	Z	AT5G43900.1	myosin_2
TEST	evm.model.Ug_unitig_85.62	probable inactive ATP-dependent zinc metalloprotease FTSHI 2, chloroplastic	EC:3.4.24;EC:3.6.1.3;EC:3.6.1.15	O	AT3G16290.1	AAA-type_ATPase_family_protein
TEST	evm.model.Ug_unitig_85.60	Pleiotropic drug resistance protein 12	EC:3.6.1.3;EC:3.6.3.25;EC:7.3.2.3;EC:3.6.1.15	Q	AT1G15210.1	pleiotropic_drug_resistance_7
TEST	evm.model.Ug_unitig_85.33	DNA mismatch repair protein MSH6	EC:3.6.1.3;EC:3.6.1.15	L	AT4G02070.1	MUTS_homolog_6
TEST	evm.model.Ug_unitig_82.122	ribonuclease P protein subunit p25-like protein	EC:3.6.1.3;EC:3.6.1.15	S	AT1G76010.2	Alba_DNA/RNA-binding_protein
TEST	evm.model.Ug_unitig_62.813	Abc transporter b family member 25, mitochondrial	EC:7.2.2.2;EC:3.6.1.3;EC:7.6.2.2;EC:3.6.1.15	Q	AT5G58270.1	ABC_transporter_of_the_mitochondrion_3
TEST	evm.model.Ug_unitig_62.680	Calcium-transporting ATPase, endoplasmic reticulum-type	EC:3.6.1.3;EC:7.1.2.1;EC:7.2.2.10;EC:3.6.1.15	P	AT4G00900.2	ER-type_Ca2+-ATPase_2
TEST	evm.model.Ug_unitig_62.673	protein TRIGALACTOSYLDIACYLGLYCEROL 3, chloroplastic	EC:3.6.1.3;EC:3.6.3.25;EC:7.3.2.3;EC:3.6.1.15	Q	AT1G65410.1	non-intrinsic_ABC_protein_11
TEST	evm.model.Ug_unitig_62.647	Phospholipid-transporting ATPase	EC:3.6.1.3;EC:7.6.2.1;EC:3.6.1.15	P	AT1G54280.3	ATPase_E1-E2_type_family_protein_/_haloacid_dehalogenase-like_hydrolase_family_protein
TEST	evm.model.Ug_unitig_62.623	ABC transporter G family member 7	EC:3.6.1.3;EC:3.6.3.25;EC:7.3.2.3;EC:3.6.1.15	Q	AT2G01320.3	ABC-2_type_transporter_family_protein
TEST	evm.model.Ug_unitig_62.604	Phospholipid-transporting ATPase	EC:3.6.1.3;EC:7.6.2.1;EC:3.6.1.15	P	AT1G68710.2	ATPase_E1-E2_type_family_protein_/_haloacid_dehalogenase-like_hydrolase_family_protein
TEST	evm.model.Ug_unitig_62.502	regulator of telomere elongation helicase 1-like isoform X1	EC:3.6.1.3;EC:3.6.4.12;EC:3.6.1.15	L	AT1G79950.1	RAD3-like_DNA-binding_helicase_protein
TEST	evm.model.Ug_unitig_62.463	ABC transporter A family member 2	EC:3.6.1.3;EC:3.6.3.25;EC:7.3.2.3;EC:3.6.1.15	I	AT3G47730.1	ATP-binding_cassette_A2
TEST	evm.model.Ug_unitig_62.384	DNA helicase	EC:3.6.1.3;EC:3.6.1.15	L	AT2G07690.1	Minichromosome_maintenance_(MCM2/3/5)_family_protein
TEST	evm.model.Ug_unitig_62.337	Calcium-transporting ATPase	EC:3.6.1.3;EC:7.2.2.10;EC:3.6.1.15	P	AT4G37640.1	calcium_ATPase_2
TEST	evm.model.Ug_unitig_62.331	Putative cadmium/zinc-transporting ATPase HMA1, chloroplastic	EC:3.6.1.3;EC:7.2.2.10;EC:3.6.1.15	P	AT4G37270.1	heavy_metal_atpase_1
TEST	evm.model.Ug_unitig_62.327	Kinesin-like protein	EC:3.6.1.3;EC:3.6.4.5;EC:3.6.1.15	Z	AT2G22610.2	Di-glucose_binding_protein_with_Kinesin_motor_domain-containing_protein
TEST	evm.model.Ug_unitig_62.326	Plasma membrane ATPase	EC:3.6.1.3;EC:7.1.2.1;EC:6.1.1.6;EC:3.6.1.15	P	AT2G24520.2	plasma_membrane_H+-ATPase
TEST	evm.model.Ug_unitig_62.236	ABC transporter G family member 26-like	EC:3.6.1.3;EC:7.4.2.1;EC:7.3.2.5;EC:3.6.1.15	Q	AT3G13220.1	ABC-2_type_transporter_family_protein
TEST	evm.model.Ug_unitig_61.319	protein MICRORCHIDIA 2-like	EC:3.6.1.3;EC:3.6.1.15	D	AT4G36290.1	compromized_recognition_of_TCV_1
TEST	evm.model.Ug_unitig_61.284	ABC transporter C family member 14-like	EC:3.6.1.3;EC:7.6.2.2;EC:3.6.1.15	Q	AT2G47800.1	multidrug_resistance-associated_protein_4
TEST	evm.model.Ug_unitig_61.283	ABC transporter C family member 14-like	EC:3.6.1.3;EC:7.6.2.2;EC:3.6.1.15	Q	AT2G47800.1	multidrug_resistance-associated_protein_4
TEST	evm.model.Ug_unitig_61.257	ABC transporter I family member 17	EC:3.6.1.3;EC:7.3.2.1;EC:3.6.1.15	Q	AT1G67940.1	non-intrinsic_ABC_protein_3
TEST	evm.model.Ug_unitig_61.189	DNA mismatch repair protein MSH2	EC:3.6.1.3;EC:3.6.1.15	L	AT3G18524.1	MUTS_homolog_2
TEST	evm.model.Ug_unitig_61.182	RNA helicase	EC:3.6.1.3;EC:3.6.4.13;EC:3.6.1.15	A	AT3G18600.1	P-loop_containing_nucleoside_triphosphate_hydrolases_superfamily_protein
TEST	evm.model.Ug_unitig_61.164	DNA repair protein RAD51 homolog 2	EC:3.6.1.3;EC:3.6.1.8;EC:3.6.1.19;EC:3.6.1.15	L	AT2G28560.6	DNA_repair_(Rad51)_family_protein
TEST	evm.model.Ug_unitig_61.89	Helicase SEN1	EC:3.6.1.3;EC:3.6.1.15	A	AT1G16800.1	P-loop_containing_nucleoside_triphosphate_hydrolases_superfamily_protein
TEST	evm.model.Ug_unitig_61.20	ABC transporter I family member 10, chloroplastic	EC:3.6.1.3;EC:7.6.2.11;EC:3.6.1.15	Q	AT4G33460.1	ABC_transporter_family_protein
TEST	evm.model.Ug_unitig_60.340	DExH-box ATP-dependent RNA helicase DExH14 isoform X1	EC:3.6.1.3;EC:3.6.1.15	A	AT5G61140.2	U5_small_nuclear_ribonucleoprotein_helicase
TEST	evm.model.Ug_unitig_60.148	DEAD-box ATP-dependent RNA helicase 46	EC:3.6.1.3;EC:3.6.4.13;EC:3.6.1.15	A	AT3G06480.1	DEAD_box_RNA_helicase_family_protein
TEST	evm.model.Ug_unitig_60.17	Kinesin-like protein (Fragment)	EC:3.6.1.3;EC:3.6.1.15	Z	AT1G18410.1	P-loop_containing_nucleoside_triphosphate_hydrolases_superfamily_protein
TEST	evm.model.Ug_unitig_52.768	ATP-dependent DNA helicase At3g02060, chloroplastic	EC:3.6.1.3;EC:3.6.1.15	A	AT3G02060.3	DEAD/DEAH_box_helicase
TEST	evm.model.Ug_unitig_52.688	RuvB-like helicase	EC:3.6.1.3;EC:3.6.4.12;EC:3.6.1.15	L	AT5G67630.1	P-loop_containing_nucleoside_triphosphate_hydrolases_superfamily_protein
TEST	evm.model.Ug_unitig_52.648	Heat shock 70 kDa protein	EC:1.3.1.74;EC:3.6.1.3;EC:3.6.1.15	O	AT1G16030.1	heat_shock_protein_70B
TEST	evm.model.Ug_unitig_52.627	DEAD-box ATP-dependent RNA helicase 29	EC:3.6.1.3;EC:3.6.4.13;EC:3.6.1.15	A	AT1G77030.1	putative_DEAD-box_ATP-dependent_RNA_helicase_29
TEST	evm.model.Ug_unitig_52.590	ATP-dependent Clp protease proteolytic subunit	EC:3.4.21;EC:3.6.1.3;EC:3.6.1.15	O	AT1G12410.1	CLP_protease_proteolytic_subunit_2
TEST	evm.model.Ug_unitig_52.584	endoribonuclease Dicer homolog 1	EC:3.1.30;EC:3.6.1.3;EC:3.1.26;EC:3.1.26.3;EC:3.6.1.15	A	AT1G01040.1	dicer-like_1
TEST	evm.model.Ug_unitig_52.575	Protein microrchidia 6	EC:3.6.1.3;EC:3.6.1.15	D	AT1G19100.1	Histidine_kinase-%2C_DNA_gyrase_B-%2C_and_HSP90-like_ATPase_family_protein
TEST	evm.model.Ug_unitig_52.566	ABC transporter C family member 13	EC:1.3.1.74;EC:3.6.1.3;EC:3.6.1.15	Q	AT2G07680.3	multidrug_resistance-associated_protein_11
TEST	evm.model.Ug_unitig_52.481	DExH-box ATP-dependent RNA helicase DExH3	EC:3.6.1.3;EC:3.6.4.13;EC:3.6.1.15	A	AT5G04895.1	DEA(D/H)-box_RNA_helicase_family_protein
TEST	evm.model.Ug_unitig_52.472	ATP-dependent DNA helicase homolog RECG, chloroplastic-like	EC:3.6.1.3;EC:3.6.4.12;EC:3.6.4.13;EC:3.6.1.15	A	AT2G01440.1	DEAD/DEAH_box_RNA_helicase_family_protein
TEST	evm.model.Ug_unitig_52.392	Protein CHROMATIN REMODELING 19	EC:3.6.1.3;EC:3.6.1.15	B	AT2G02090.1	SNF2_domain-containing_protein_/_helicase_domain-containing_protein
TEST	evm.model.Ug_unitig_52.333	Spastin like	EC:3.6.1.3;EC:3.6.1.15	O	AT1G64110.4	P-loop_containing_nucleoside_triphosphate_hydrolases_superfamily_protein
TEST	evm.model.Ug_unitig_52.320	replication factor C subunit 2	EC:3.6.1.3;EC:2.7.7.7;EC:3.6.1.15	L	AT1G21690.1	ATPase_family_associated_with_various_cellular_activities_(AAA)
TEST	evm.model.Ug_unitig_46.736	Dna mismatch repair protein msh3	EC:3.6.1.3;EC:3.6.1.15	L	AT4G25540.1	homolog_of_DNA_mismatch_repair_protein_MSH3
TEST	evm.model.Ug_unitig_46.731	xyloglucan galactosyltransferase XLT2	EC:3.4.24;EC:3.6.1.3;EC:3.6.1.15	GMW	AT5G62220.1	glycosyltransferase_18
TEST	evm.model.Ug_unitig_46.697	SNF2 domain-containing protein CLASSY 1-like	EC:3.6.1.3;EC:3.6.1.15	L	AT5G20420.1	chromatin_remodeling_42
TEST	evm.model.Ug_unitig_46.585	ATP-dependent RNA helicase SUV3, mitochondrial isoform X2	EC:3.6.1.3;EC:3.6.4.12;EC:3.6.4.13;EC:3.6.1.15	A	AT4G14790.2	ATP-dependent_RNA_helicase
TEST	evm.model.Ug_unitig_46.576	ATPase ARSA1 isoform A	EC:3.6.3.16;EC:3.6.1.3;EC:3.6.1.15	P	AT3G10350.1	P-loop_containing_nucleoside_triphosphate_hydrolases_superfamily_protein
TEST	evm.model.Ug_unitig_46.502	DEAD-box ATP-dependent RNA helicase 36	EC:3.6.1.3;EC:3.6.4.13;EC:3.6.1.15	A	AT1G16280.1	RNA_helicase_36
TEST	evm.model.Ug_unitig_46.433	DNA-binding protein SMUBP-2	EC:3.6.1.3;EC:3.6.4.12;EC:3.6.4.13;EC:3.6.1.15	L	AT2G03270.1	DNA-binding_protein
TEST	evm.model.Ug_unitig_46.343	Protein CHROMATIN REMODELING	EC:3.6.1.3;EC:3.6.1.15	KL	AT2G18760.7	chromatin_remodeling_8
TEST	evm.model.Ug_unitig_46.312	Kinesin-like protein	EC:3.6.1.3;EC:3.6.1.15	Z	AT1G72250.2	Di-glucose_binding_protein_with_Kinesin_motor_domain-containing_protein
TEST	evm.model.Ug_unitig_46.125	ribonuclease P protein subunit p25-like protein	EC:3.1.30;EC:3.6.1.3;EC:3.1.26;EC:3.1.26.5;EC:3.6.1.15	S	AT1G20220.1	Alba_DNA/RNA-binding_protein
TEST	evm.model.Ug_unitig_46.17	Kinesin-like protein FRA1	EC:3.6.1.3;EC:3.6.1.15;EC:3.6.4.4	Z	AT5G47820.2	P-loop_containing_nucleoside_triphosphate_hydrolases_superfamily_protein
TEST	evm.model.Ug_unitig_46.3	DEAD-box ATP-dependent RNA helicase 56-like isoform X1	EC:3.6.1.3;EC:3.6.4.13;EC:3.6.1.15	A	AT5G11200.1	DEAD/DEAH_box_RNA_helicase_family_protein
TEST	evm.model.Ug_unitig_37.1037	DNA helicase	EC:3.6.1.3;EC:3.6.4.12;EC:3.6.1.15	L	AT5G44635.1	minichromosome_maintenance_(MCM2/3/5)_family_protein
TEST	evm.model.Ug_unitig_37.1004	Kinesin-like protein	EC:3.6.1.3;EC:3.6.1.15	Z	AT4G24170.2	ATP_binding_microtubule_motor_family_protein
TEST	evm.model.Ug_unitig_37.941	lactation elevated protein 1 isoform X2	EC:3.6.1.3;EC:3.6.1.15	S	AT2G25530.1	AFG1-like_ATPase_family_protein
TEST	evm.model.Ug_unitig_37.794	Plasma membrane ATPase	EC:3.6.1.3;EC:7.1.2.1;EC:3.6.1.15	P	AT4G30190.1	H[+]-ATPase_2
TEST	evm.model.Ug_unitig_37.742	DNA helicase INO80 isoform X2	EC:3.6.1.3;EC:3.6.1.15	L	AT3G57300.4	DNA_helicase_INO80-like_protein
TEST	evm.model.Ug_unitig_37.489	myosin-11-like isoform X1	EC:3.6.1.3;EC:3.6.1.15	Z	AT1G54560.2	Myosin_family_protein_with_Dil_domain-containing_protein
TEST	evm.model.Ug_unitig_37.488	myosin-11-like isoform X1	EC:3.6.1.3;EC:3.6.1.15	Z	AT1G54560.1	Myosin_family_protein_with_Dil_domain-containing_protein
TEST	evm.model.Ug_unitig_37.418	ATP-dependent DNA helicase DDM1-like isoform X2	EC:3.6.1.3;EC:3.6.4.12;EC:3.6.1.15	K	AT5G66750.1	chromatin_remodeling_1
TEST	evm.model.Ug_unitig_37.370	ABC transporter G family member 24-like	EC:3.6.1.3;EC:3.6.1.15	Q	AT1G53390.1	P-loop_containing_nucleoside_triphosphate_hydrolases_superfamily_protein
TEST	evm.model.Ug_unitig_37.349	Protein CHROMATIN REMODELING 20	EC:3.6.1.3;EC:3.6.1.15	K	AT1G08600.4	P-loop_containing_nucleoside_triphosphate_hydrolases_superfamily_protein
TEST	evm.model.Ug_unitig_37.292	PDR protein 2	EC:3.6.1.3;EC:3.6.3.25;EC:7.3.2.3;EC:3.6.1.15	Q	AT2G26910.1	pleiotropic_drug_resistance_4
TEST	evm.model.Ug_unitig_37.288	helicase and polymerase-containing protein TEBICHI isoform X1	EC:3.6.1.3;EC:3.6.4.12;EC:2.7.7.7;EC:3.6.1.15	A	AT4G32700.2	MUS308_and_mammalian_DNA_polymerase-like_protein
TEST	evm.model.Ug_unitig_37.278	DNA repair protein recA homolog 1, chloroplastic-like isoform X1	EC:3.6.1.3;EC:3.6.1.8;EC:3.6.1.19;EC:3.6.1.15	L	AT1G79050.1	recA_DNA_recombination_family_protein
TEST	evm.model.Ug_unitig_37.214	probable inactive ATP-dependent zinc metalloprotease FTSHI 1, chloroplastic	EC:3.4.24;EC:3.6.1.3;EC:3.6.3.52;EC:7.4.2.5;EC:3.6.1.15	O	AT4G23940.1	FtsH_extracellular_protease_family
TEST	evm.model.Ug_unitig_37.41	ABC transporter B family member 28 isoform X1	EC:3.6.1.3;EC:7.4.2.5;EC:3.6.1.15	Q	AT4G25450.1	non-intrinsic_ABC_protein_8
TEST	evm.model.Ug_unitig_32.1006	Ribulose bisphosphate carboxylase/oxygenase activase 2, chloroplastic	EC:3.6.1.3;EC:3.6.1.15	O	AT2G39730.2	rubisco_activase
TEST	evm.model.Ug_unitig_32.939	ABC transporter I family member 1	EC:7.6.2.5;EC:3.6.1.3;EC:3.6.1.15	I	AT1G63270.1	non-intrinsic_ABC_protein_10
TEST	evm.model.Ug_unitig_32.909	meiotic recombination protein DMC1 homolog	EC:3.6.1.3;EC:3.6.1.15	L	AT3G22880.2	DNA_repair_(Rad51)_family_protein
TEST	evm.model.Ug_unitig_32.740	ABC transporter I family member 20	EC:3.6.1.3;EC:3.6.1.15	K	AT5G02270.1	non-intrinsic_ABC_protein_9
TEST	evm.model.Ug_unitig_32.722	CHD3-type chromatin-remodeling factor PICKLE	EC:3.6.1.3;EC:3.6.1.15	KL	AT2G25170.2	chromatin_remodeling_factor_CHD3_(PICKLE)
TEST	evm.model.Ug_unitig_32.699	Phospholipid-transporting ATPase	EC:3.6.1.3;EC:7.6.2.1;EC:3.6.1.15	P	AT5G44240.2	aminophospholipid_ATPase_2
TEST	evm.model.Ug_unitig_32.528	DEAD-box ATP-dependent RNA helicase 28	EC:3.6.1.3;EC:3.6.4.13;EC:3.6.1.15	A	AT4G16630.1	DEA(D/H)-box_RNA_helicase_family_protein
TEST	evm.model.Ug_unitig_32.469	Fanconi anemia group J protein homolog	EC:3.6.1.3;EC:3.6.4.12;EC:3.6.1.15	L	AT1G20720.2	RAD3-like_DNA-binding_helicase_protein
TEST	evm.model.Ug_unitig_32.467	ATP-dependent Clp protease proteolytic subunit	EC:3.4.21;EC:3.6.1.3;EC:3.6.1.15	O	AT1G09130.2	ATP-dependent_caseinolytic_(Clp)_protease/crotonase_family_protein
TEST	evm.model.Ug_unitig_32.386	ABC transporter D family member 2, chloroplastic	EC:3.6.1.3;EC:3.6.3.47;EC:3.6.1.15	I	AT1G54350.1	ABC_transporter_family_protein
TEST	evm.model.Ug_unitig_32.304	endonuclease MutS2	EC:3.6.1.3;EC:3.6.1.15	L	AT1G65070.2	DNA_mismatch_repair_protein_MutS%2C_type_2
TEST	evm.model.Ug_unitig_32.161	Increased DNA methylation 1 isoform B	EC:3.6.1.3;EC:3.6.1.15	S	AT4G14920.3	Acyl-CoA_N-acyltransferase_with_RING/FYVE/PHD-type_zinc_finger_protein
TEST	evm.model.Ug_unitig_32.120	ABC transporter F family member 4	EC:3.6.1.3;EC:7.3.2.2;EC:3.6.1.15	J	AT3G54540.2	general_control_non-repressible_4
TEST	evm.model.Ug_unitig_32.6	Dynein light chain	EC:3.6.1.3;EC:3.6.1.15;EC:3.6.4.4	Z	AT4G15930.1	Dynein_light_chain_type_1_family_protein
TEST	evm.model.Ug_unitig_30.1	1,4-alpha-glucan-branching enzyme 1, chloroplastic/amyloplastic	EC:3.6.1.3;EC:2.4.1.18;EC:3.6.1.15	G	AT5G03650.1	starch_branching_enzyme_2.2
TEST	evm.model.Ug_unitig_27.585	DEAD-box ATP-dependent RNA helicase 38	EC:3.6.1.3;EC:3.6.4.13;EC:3.6.1.15	A	AT3G53110.1	P-loop_containing_nucleoside_triphosphate_hydrolases_superfamily_protein
TEST	evm.model.Ug_unitig_27.542	probable inactive ATP-dependent zinc metalloprotease FTSHI 4, chloroplastic	EC:3.4.24;EC:3.6.1.3;EC:3.6.3.52;EC:7.4.2.5;EC:3.6.1.15	O	AT5G64580.1	AAA-type_ATPase_family_protein
TEST	evm.model.Ug_unitig_27.520	Dynein light chain	EC:3.6.1.3;EC:3.6.1.15;EC:3.6.4.4	Z	AT1G23220.1	Dynein_light_chain_type_1_family_protein
TEST	evm.model.Ug_unitig_27.168	Putative helicase magatama 3	EC:3.6.1.3;EC:3.6.1.15	L	AT4G15570.3	P-loop_containing_nucleoside_triphosphate_hydrolases_superfamily_protein
TEST	evm.model.Ug_unitig_26.1635	Myosin-1 isoform A	EC:3.6.1.3;EC:3.6.1.15	Z	AT3G19960.5	myosin_1
TEST	evm.model.Ug_unitig_26.1535	DNA helicase	EC:3.6.1.3;EC:3.6.1.15	L	AT1G44900.1	minichromosome_maintenance_(MCM2/3/5)_family_protein
TEST	evm.model.Ug_unitig_26.1347	ABC transporter G family member 31	EC:3.6.1.3;EC:3.6.1.15;EC:7.2.2.16	Q	AT2G29940.1	pleiotropic_drug_resistance_3
TEST	evm.model.Ug_unitig_26.1346	Abc transporter g family member 31	EC:3.6.1.3;EC:3.6.1.15;EC:7.2.2.16	Q	AT2G29940.1	pleiotropic_drug_resistance_3
TEST	evm.model.Ug_unitig_26.1020	Kinesin-like protein	EC:3.6.1.3;EC:3.6.1.15	Z	AT1G59540.1	P-loop_containing_nucleoside_triphosphate_hydrolases_superfamily_protein
TEST	evm.model.Ug_unitig_26.1017	DNA mismatch repair protein MLH1 (Fragment)	EC:3.6.1.3;EC:3.6.1.15	L	AT4G09140.1	MUTL-homologue_1
TEST	evm.model.Ug_unitig_26.999	DExH-box ATP-dependent RNA helicase DExH12-like	EC:3.6.1.3;EC:3.6.4.13;EC:3.6.1.15	A	AT1G20960.2	U5_small_nuclear_ribonucleoprotein_helicase
TEST	evm.model.Ug_unitig_26.885	Spastin like	EC:3.6.1.3;EC:3.6.1.15;EC:3.6.4.3	O	AT2G45500.1	AAA-type_ATPase_family_protein
TEST	evm.model.Ug_unitig_26.866	replication factor C subunit 2	EC:3.6.1.3;EC:2.7.7.7;EC:3.6.1.15	L	AT1G63160.1	replication_factor_C_2
TEST	evm.model.Ug_unitig_26.863	Kinesin-like protein	EC:3.6.1.3;EC:3.6.1.15	Z	AT1G63640.2	P-loop_nucleoside_triphosphate_hydrolases_superfamily_protein_with_CH_(Calponin_Homology)_domain-containing_protein
TEST	evm.model.Ug_unitig_26.783	AAA+-type ATPase	EC:3.6.1.3;EC:3.6.1.15	O	AT3G19740.1	P-loop_containing_nucleoside_triphosphate_hydrolases_superfamily_protein
TEST	evm.model.Ug_unitig_26.729	Lon protease homolog, mitochondrial	EC:3.4.21;EC:3.6.1.3;EC:3.6.1.15	O	AT5G26860.1	lon_protease_1
TEST	evm.model.Ug_unitig_26.593	ATP-dependent DNA helicase	EC:3.6.1.3;EC:3.6.4.12;EC:3.6.1.15	L	AT4G35740.1	DEAD/DEAH_box_RNA_helicase_family_protein
TEST	evm.model.Ug_unitig_26.510	Kinesin-like protein	EC:3.6.1.3;EC:3.6.1.15	Z	AT1G01950.1	armadillo_repeat_kinesin_2
TEST	evm.model.Ug_unitig_26.260	protein PHOTOPERIOD-INDEPENDENT EARLY FLOWERING 1 isoform X1	EC:3.6.1.3;EC:3.6.1.15	KL	AT3G12810.1	SNF2_domain-containing_protein_/_helicase_domain-containing_protein
TEST	evm.model.Ug_unitig_26.245	Calcium-transporting ATPase	EC:3.6.1.3;EC:7.2.2.10;EC:3.6.1.15	P	AT3G57330.1	autoinhibited_Ca2+-ATPase_11
TEST	evm.model.Ug_unitig_26.243	kinesin-4 isoform X2	EC:3.6.1.3;EC:3.6.1.15	Z	AT3G10310.2	P-loop_nucleoside_triphosphate_hydrolases_superfamily_protein_with_CH_(Calponin_Homology)_domain-containing_protein
TEST	evm.model.Ug_unitig_26.224	DExH-box ATP-dependent RNA helicase DExH7, chloroplastic isoform X1	EC:3.6.1.3;EC:3.6.4.13;EC:3.6.1.15	A	AT1G58060.1	RNA_helicase_family_protein
TEST	evm.model.Ug_unitig_26.27	pachytene checkpoint protein 2 homolog	EC:3.6.1.3;EC:3.6.1.15;EC:3.6.4.3	O	AT4G24710.3	pachytene_checkpoint-like_protein
TEST	evm.model.Ug_unitig_22.1482	DEAD-box ATP-dependent RNA helicase 8	EC:3.6.1.3;EC:3.6.4.13;EC:3.6.1.15	A	AT4G00660.2	RNAhelicase-like_8
TEST	evm.model.Ug_unitig_22.1422	Protein translocase subunit SecA	EC:3.6.1.3;EC:7.4.2.3;EC:7.4.2.4;EC:7.4.2.5;EC:3.6.1.15	F	AT1G21650.2	Preprotein_translocase_SecA_family_protein
TEST	evm.model.Ug_unitig_22.1307	Protein CfxQ like	EC:3.6.1.3;EC:3.6.1.15	O	AT3G24530.1	AAA-type_ATPase_family_protein_/_ankyrin_repeat_family_protein
TEST	evm.model.Ug_unitig_22.1251	DNA helicase	EC:3.6.1.3;EC:3.6.4.12;EC:3.6.1.15	L	AT2G16440.1	Minichromosome_maintenance_(MCM2/3/5)_family_protein
TEST	evm.model.Ug_unitig_22.1178	Dexh-box atp-dependent rna helicase dexh15 chloroplastic	EC:3.6.1.3;EC:3.6.4.13;EC:3.6.1.15	A	AT1G70070.1	DEAD/DEAH_box_helicase
TEST	evm.model.Ug_unitig_22.1122	ATP-dependent DNA helicase Q-like 5	EC:3.6.1.3;EC:3.6.4.12;EC:3.6.1.15	A	AT1G27880.1	DEAD/DEAH_box_RNA_helicase_family_protein
TEST	evm.model.Ug_unitig_22.1071	myosin-1-like isoform X1	EC:3.6.1.3;EC:3.6.1.15	Z	AT3G19960.5	myosin_1
TEST	evm.model.Ug_unitig_22.1027	Abc transporter c family member 5	EC:3.6.1.3;EC:7.6.2.2;EC:3.6.1.15	Q	AT1G04120.1	multidrug_resistance-associated_protein_5
TEST	evm.model.Ug_unitig_22.1006	ABC transporter I family member 17	EC:3.6.1.3;EC:7.3.2.1;EC:3.6.1.15	Q	AT1G67940.1	non-intrinsic_ABC_protein_3
TEST	evm.model.Ug_unitig_22.954	Adaptin ear-binding coat-associated protein 1	EC:3.6.1.3;EC:3.6.1.15	S	AT3G58600.1	Adaptin_ear-binding_coat-associated_protein_1_NECAP-1
TEST	evm.model.Ug_unitig_22.930	GDP-mannose transporter GONST1-like isoform X2	EC:3.6.1.3;EC:3.6.1.15	GOU	AT2G13650.3	golgi_nucleotide_sugar_transporter_1
TEST	evm.model.Ug_unitig_22.909	Phragmoplast orienting kinesin 2	EC:3.6.1.3;EC:3.6.1.15	Z	AT3G44050.1	P-loop_containing_nucleoside_triphosphate_hydrolases_superfamily_protein
TEST	evm.model.Ug_unitig_22.826	DNA repair protein recA-like protein 2, mitochondrial	EC:3.6.1.3;EC:3.6.1.8;EC:3.6.1.19;EC:3.6.1.15	L	AT3G10140.1	RECA_homolog_3
TEST	evm.model.Ug_unitig_22.614	AAA+-type ATPase	EC:3.6.1.3;EC:3.6.1.15;EC:3.6.4.3	O	AT1G02890.1	AAA-type_ATPase_family_protein
TEST	evm.model.Ug_unitig_22.427	Phospholipid-transporting ATPase	EC:3.6.1.3;EC:7.6.2.1;EC:3.6.1.15	P	AT1G59820.1	aminophospholipid_ATPase_3
TEST	evm.model.Ug_unitig_22.388	Regulator of nonsense transcripts 1-like protein	EC:3.6.1.3;EC:3.6.1.15	A	AT5G47010.1	RNA_helicase
TEST	evm.model.Ug_unitig_22.385	Replication factor c subunit 3	EC:3.6.1.3;EC:3.6.1.15	L	AT1G77470.1	replication_factor_C_subunit_3
TEST	evm.model.Ug_unitig_22.151	Dexh-box atp-dependent rna helicase dexh8	EC:3.6.1.3;EC:3.6.4.13;EC:3.6.1.15	A	AT2G47680.1	zinc_finger_(CCCH_type)_helicase_family_protein
TEST	evm.model.Ug_unitig_22.142	ATP-dependent RNA helicase DEAH13	EC:3.6.1.3;EC:3.6.4.13;EC:3.6.1.15	A	AT1G33390.2	RNA_helicase_family_protein
TEST	evm.model.Ug_unitig_22.141	ATP-dependent RNA helicase DEAH13-like	EC:3.6.1.3;EC:3.6.4.13;EC:3.6.1.15	AJ	AT1G33390.2	RNA_helicase_family_protein
TEST	evm.model.Ug_unitig_22.88	26S proteasome regulatory complex, ATPase RPT4	EC:3.6.1.3;EC:3.6.1.15;EC:3.6.4.3	O	AT5G43010.1	regulatory_particle_triple-A_ATPase_4A
TEST	evm.model.Ug_unitig_22.29	Replication protein A subunit	EC:3.6.1.3;EC:3.6.1.15	L	AT2G06510.1	replication_protein_A_1A
TEST	evm.model.Ug_unitig_22.26	ABC transporter B family member 1	EC:3.6.1.3;EC:7.6.2.2;EC:7.2.2.7;EC:3.6.1.15	Q	AT2G36910.1	ATP_binding_cassette_subfamily_B1
TEST	evm.model.Ug_unitig_22.22	putative white-brown complex homolog protein 30	EC:3.6.1.3;EC:3.6.3.25;EC:7.3.2.3;EC:3.6.1.15	Q	AT2G37010.2	non-intrinsic_ABC_protein_12
TEST	evm.model.Ug_unitig_21.906	Kinesin-like protein	EC:3.6.1.3;EC:3.6.1.15	Z	AT5G02370.1	ATP_binding_microtubule_motor_family_protein
TEST	evm.model.Ug_unitig_21.816	Kinesin-like protein	EC:3.6.1.3;EC:3.6.1.15	Z	AT3G10180.1	P-loop_containing_nucleoside_triphosphate_hydrolases_superfamily_protein
TEST	evm.model.Ug_unitig_21.798	probable inactive ATP-dependent zinc metalloprotease FTSHI 5, chloroplastic isoform X1	EC:3.4.21;EC:3.4.24;EC:3.6.1.3;EC:3.6.3.52;EC:7.4.2.5;EC:3.6.1.15	O	AT3G04340.1	FtsH_extracellular_protease_family
TEST	evm.model.Ug_unitig_21.708	protein CHROMATIN REMODELING 35-like isoform X2	EC:3.6.1.3;EC:3.6.1.15	A	AT2G16390.1	SNF2_domain-containing_protein_/_helicase_domain-containing_protein
TEST	evm.model.Ug_unitig_21.593	Calmodulin-interacting protein	EC:3.6.1.3;EC:3.6.1.15	O	AT3G56690.1	Cam_interacting_protein_111
TEST	evm.model.Ug_unitig_21.557	Obg-like ATPase 1	EC:3.6.1.3;EC:3.6.1.15	J	AT1G30580.1	GTP_binding_protein
TEST	evm.model.Ug_unitig_21.555	DNA helicase	EC:3.6.1.3;EC:3.6.1.15	L	AT5G46280.1	Minichromosome_maintenance_(MCM2/3/5)_family_protein
TEST	evm.model.Ug_unitig_21.530	Annexin	EC:3.6.1.3;EC:3.6.1.15;EC:1.11.1.7	U	AT1G35720.1	annexin_1
TEST	evm.model.Ug_unitig_21.432	DEAD-box ATP-dependent RNA helicase 47, mitochondrial	EC:3.6.1.3;EC:3.6.4.13;EC:3.6.1.15	J	AT1G12770.2	P-loop_containing_nucleoside_triphosphate_hydrolases_superfamily_protein
TEST	evm.model.Ug_unitig_21.305	probable DEAD-box ATP-dependent RNA helicase 48	EC:3.6.1.3;EC:3.6.4.13;EC:3.6.1.15	A	AT2G07750.1	DEA(D/H)-box_RNA_helicase_family_protein
TEST	evm.model.Ug_unitig_21.232	intron-binding protein aquarius	EC:3.6.1.3;EC:3.6.1.15	L	AT2G38770.1	P-loop_containing_nucleoside_triphosphate_hydrolases_superfamily_protein
TEST	evm.model.Ug_unitig_21.228	kinesin-like protein KIN12A	EC:3.6.1.3;EC:3.6.1.15;EC:3.6.4.4	Z	AT3G20150.1	Kinesin_motor_family_protein
TEST	evm.model.Ug_unitig_21.69	ABC transporter G family member 9-like	EC:3.6.1.3;EC:7.6.2.11;EC:3.6.1.15	Q	AT4G27420.1	ABC-2_type_transporter_family_protein
TEST	evm.model.Ug_unitig_21.51	ATP-dependent RNA helicase	EC:3.6.1.3;EC:3.6.4.13;EC:3.6.1.15	A	AT3G26560.1	ATP-dependent_RNA_helicase
TEST	evm.model.Ug_unitig_21.28	Kinesin-like protein	EC:3.6.1.3;EC:3.6.4.5;EC:3.6.1.15	Z	AT5G27000.1	kinesin_4
TEST	evm.model.Ug_unitig_21.23	Kinesin-like protein	EC:3.6.1.3;EC:3.6.1.15	Z	AT2G21300.5	ATP_binding_microtubule_motor_family_protein
TEST	evm.model.Ug_unitig_21.1	DEAD-box ATP-dependent RNA helicase 50	EC:3.6.1.3;EC:3.6.4.13;EC:3.6.1.15	A	AT3G06980.1	DEA(D/H)-box_RNA_helicase_family_protein
TEST	evm.model.Ug_unitig_8.1859	Kinesin-like protein	EC:3.6.1.3;EC:3.6.1.15;EC:3.6.4.4	Z	noTAIR	NULL
TEST	evm.model.Ug_unitig_8.1809	ABC transporter G family member 22	EC:3.6.1.3;EC:3.6.1.15	Q	AT5G06530.2	ABC-2_type_transporter_family_protein
TEST	evm.model.Ug_unitig_8.1726	katanin p60 ATPase-containing subunit A-like 2 isoform X1	EC:3.6.1.3;EC:3.6.1.15;EC:3.6.4.3	O	AT2G34560.2	P-loop_containing_nucleoside_triphosphate_hydrolases_superfamily_protein
TEST	evm.model.Ug_unitig_8.1469	RNA helicase	EC:3.6.1.3;EC:3.6.4.13;EC:3.6.1.15	A	AT5G54910.1	DEA(D/H)-box_RNA_helicase_family_protein
TEST	evm.model.Ug_unitig_8.1427	ATP-dependent DNA helicase Q-like 4A isoform X1	EC:3.6.1.3;EC:3.6.4.12;EC:3.6.1.15	A	AT1G10930.1	DNA_helicase_(RECQl4A)
TEST	evm.model.Ug_unitig_8.1351	DNA repair protein RAD51 homolog	EC:3.6.1.3;EC:3.6.1.15	L	AT5G20850.1	RAS_associated_with_diabetes_protein_51
TEST	evm.model.Ug_unitig_8.1254	RNA helicase	EC:3.6.1.3;EC:3.6.4.13;EC:3.6.1.15	A	AT2G40700.1	P-loop_containing_nucleoside_triphosphate_hydrolases_superfamily_protein
TEST	evm.model.Ug_unitig_8.938	DNA replication ATP-dependent helicase/nuclease DNA2	EC:3.1.30;EC:3.6.1.3;EC:3.1.21;EC:3.6.4.12;EC:3.6.1.15	L	AT1G08840.3	DNA_replication_helicase
TEST	evm.model.Ug_unitig_8.861	Abc transporter g family member 11	EC:3.6.1.3;EC:3.6.3.25;EC:7.3.2.2;EC:7.3.2.3;EC:3.6.1.15	Q	AT1G17840.1	white-brown_complex-like_protein
TEST	evm.model.Ug_unitig_8.835	Adaptin ear-binding coat-associated protein 1 NECAP-1 protein	EC:3.6.1.3;EC:3.6.1.15	S	AT1G03900.1	non-intrinsic_ABC_protein_4
TEST	evm.model.Ug_unitig_8.796	ATP-dependent zinc metalloprotease FTSH 9, chloroplastic-like	EC:3.4.24;EC:3.6.1.3;EC:3.6.1.15	O	AT5G58870.1	FTSH_protease_9
TEST	evm.model.Ug_unitig_8.762	K+ transport growth defect-like protein	EC:3.6.1.3;EC:3.6.1.15;EC:3.6.4.3	O	AT2G27600.1	AAA-type_ATPase_family_protein
TEST	evm.model.Ug_unitig_8.736	SWI/SNF-related matrix-associated actin-dependent regulator of chromatin subfamily A-like protein 1 isoform X1	EC:3.6.1.3;EC:3.6.1.15	B	AT1G48310.1	chromatin_remodeling_factor18
TEST	evm.model.Ug_unitig_8.608	ABC transporter A family member 1	EC:3.6.1.3;EC:3.6.1.15	I	AT2G41700.1	ATP-binding_cassette_A1
TEST	evm.model.Ug_unitig_8.607	Abc transporter a family member 1	EC:3.6.1.3;EC:3.6.3.25;EC:7.3.2.3;EC:3.6.1.15	I	AT2G41700.1	ATP-binding_cassette_A1
TEST	evm.model.Ug_unitig_8.561	DEAD-box ATP-dependent RNA helicase 21	EC:3.6.1.3;EC:3.6.4.13;EC:3.6.1.15	A	AT2G33730.1	P-loop_containing_nucleoside_triphosphate_hydrolases_superfamily_protein
TEST	evm.model.Ug_unitig_8.430	V-type proton ATPase subunit a	EC:3.6.1.3;EC:7.1.2.1;EC:3.6.1.15	P	AT2G28520.1	vacuolar_proton_ATPase_A1
TEST	evm.model.Ug_unitig_8.429	V-type proton ATPase subunit a	EC:3.6.1.3;EC:7.1.2.1;EC:3.6.1.15	P	AT2G28520.1	vacuolar_proton_ATPase_A1
TEST	evm.model.Ug_unitig_8.171	Chaperone protein clpd, chloroplastic	EC:3.6.1.3;EC:3.6.1.15	O	AT5G51070.1	Clp_ATPase
TEST	evm.model.Ug_unitig_8.76	Molecular chaperones mortalin/PBP74/GRP75, HSP70 superfamily	EC:3.6.1.3;EC:3.6.1.15	O	AT5G49910.1	chloroplast_heat_shock_protein_70-2
TEST	evm.model.Ug_unitig_8.61	ABC transporter B family member 26, chloroplastic	EC:3.6.1.3;EC:7.4.2.5;EC:3.6.1.15	U	AT1G70610.1	transporter_associated_with_antigen_processing_protein_1
TEST	evm.model.Ug_unitig_0.2377	Putative ATPase	EC:3.6.1.3;EC:3.6.1.15;EC:2.7.1.1	S	AT4G28070.2	AFG1-like_ATPase_family_protein
TEST	evm.model.Ug_unitig_0.2234	ABC transporter A family member 7	EC:3.6.1.3;EC:3.6.3.25;EC:7.3.2.3;EC:3.6.1.15	Q	AT3G47790.1	ABC2_homolog_7
TEST	evm.model.Ug_unitig_0.2132	DNA-binding protein SMUBP-2-like	EC:3.6.1.3;EC:3.6.4.12;EC:3.6.4.13;EC:3.6.1.15	L	AT5G35970.1	P-loop_containing_nucleoside_triphosphate_hydrolases_superfamily_protein
TEST	evm.model.Ug_unitig_0.2063	Kinesin-like protein	EC:3.6.1.3;EC:3.6.1.15	Z	AT2G21300.5	ATP_binding_microtubule_motor_family_protein
TEST	evm.model.Ug_unitig_0.1872	ATPase family AAA domain-containing protein	EC:3.6.1.3;EC:3.6.1.15	O	AT1G05910.1	cell_division_cycle_protein_48-related_/_CDC48-like_protein
TEST	evm.model.Ug_unitig_0.1769	ABC transporter G family member 6-like	EC:3.6.1.3;EC:7.3.2.2;EC:3.6.1.15	Q	AT5G13580.1	ABC-2_type_transporter_family_protein
TEST	evm.model.Ug_unitig_0.1752	Putative ATP-dependent Clp-type protease (AAA+ ATPase superfamily)	EC:3.6.1.3;EC:3.6.1.15	O	AT5G53350.1	CLP_protease_regulatory_subunit_X
TEST	evm.model.Ug_unitig_0.1702	ABC transporter I family member 11, chloroplastic	EC:3.6.1.3;EC:3.6.3.25;EC:7.3.2.3;EC:3.6.1.15	Q	AT5G14100.1	non-intrinsic_ABC_protein_14
TEST	evm.model.Ug_unitig_0.1674	Abc transporter g family member 11	EC:3.6.1.3;EC:7.3.2.2;EC:3.6.1.15	Q	AT1G17840.1	white-brown_complex-like_protein
TEST	evm.model.Ug_unitig_0.1673	ABC transporter G family member 11	EC:3.6.1.3;EC:7.3.2.2;EC:7.6.2.7;EC:3.6.1.15	Q	AT3G21090.1	ABC-2_type_transporter_family_protein
TEST	evm.model.Ug_unitig_0.1631	pentatricopeptide repeat-containing protein At1g02060, chloroplastic-like	EC:3.6.1.3;EC:3.6.4.12;EC:3.6.1.15	K	AT1G02060.1	Tetratricopeptide_repeat_(TPR)-like_superfamily_protein
TEST	evm.model.Ug_unitig_0.1513	Helicase, C-terminal	EC:3.6.1.3;EC:3.6.1.15	L	AT2G40770.3	RING-finger%2C_DEAD-like_helicase%2C_PHD_and_SNF2_domain-containing_protein
TEST	evm.model.Ug_unitig_0.1204	DNA repair protein RAD51 homolog 3-like isoform X1	EC:3.6.1.3;EC:3.6.1.8;EC:3.6.1.19;EC:3.6.1.15	L	AT2G45280.1	RAS_associated_with_diabetes_protein_51C
TEST	evm.model.Ug_unitig_0.1096	Peroxisome biogenesis protein 6	EC:3.6.1.3;EC:3.6.1.15	O	AT1G03000.1	peroxin_6
TEST	evm.model.Ug_unitig_0.1089	DNA mismatch repair protein	EC:3.6.1.3;EC:3.6.1.15	L	AT4G02460.1	DNA_mismatch_repair_protein
TEST	evm.model.Ug_unitig_0.1078	Kinesin-like protein KIN-14I	EC:3.6.1.3;EC:3.6.4.5;EC:3.6.1.15	Z	AT2G47500.2	P-loop_nucleoside_triphosphate_hydrolases_superfamily_protein_with_CH_(Calponin_Homology)_domain-containing_protein
TEST	evm.model.Ug_unitig_0.1077	DEAD-box ATP-dependent RNA helicase	EC:3.6.1.3;EC:3.6.4.13;EC:3.6.1.15	A	AT5G62190.1	DEAD_box_RNA_helicase_(PRH75)
TEST	evm.model.Ug_unitig_0.962	ATP-dependent Clp protease proteolytic subunit	EC:3.4.21;EC:3.6.1.3;EC:3.6.1.15	O	AT4G17040.1	CLP_protease_R_subunit_4
TEST	evm.model.Ug_unitig_0.946	kinesin-like protein KIN-5D	EC:3.6.1.3;EC:3.6.1.15;EC:3.6.4.4	Z	AT3G45850.2	P-loop_containing_nucleoside_triphosphate_hydrolases_superfamily_protein
TEST	evm.model.Ug_unitig_0.939	DNA repair protein RAD51 homolog 4 isoform X1	EC:3.6.1.3;EC:3.6.1.15	L	AT1G07745.1	DNA_repair_RAD51-like_protein
TEST	evm.model.Ug_unitig_0.827	Calcium-transporting ATPase	EC:3.6.1.3;EC:7.2.2.10;EC:3.6.1.15	P	AT5G57110.3	autoinhibited_Ca2+_-ATPase%2C_isoform_8
TEST	evm.model.Ug_unitig_0.738	Dexh-box atp-dependent rna helicase dexh11	EC:3.6.1.3;EC:3.6.4.13;EC:3.6.1.15	A	AT3G46960.1	RNA_helicase%2C_ATP-dependent%2C_SK12/DOB1_protein
TEST	evm.model.Ug_unitig_0.703	ATPase	EC:3.6.1.3;EC:3.6.1.15	P	AT1G01910.4	P-loop_containing_nucleoside_triphosphate_hydrolases_superfamily_protein
TEST	evm.model.Ug_unitig_0.696	pleiotropic drug resistance protein 2-like	EC:3.6.1.3;EC:3.6.1.15;EC:7.2.2.16	Q	AT2G36380.1	pleiotropic_drug_resistance_6
TEST	evm.model.Ug_unitig_0.685	putative pentatricopeptide repeat-containing protein At3g08820	EC:3.6.1.3;EC:3.6.1.15;EC:3.6.4.3	S	AT3G08820.1	Pentatricopeptide_repeat_(PPR)_superfamily_protein
TEST	evm.model.Ug_unitig_0.631	DEAD-box ATP-dependent RNA helicase 57	EC:3.6.1.3;EC:3.6.4.13;EC:3.6.1.15	A	AT3G09720.2	P-loop_containing_nucleoside_triphosphate_hydrolases_superfamily_protein
TEST	evm.model.Ug_unitig_0.559	probable DNA helicase MCM9	EC:3.6.1.3;EC:3.6.1.15	L	AT2G14050.1	minichromosome_maintenance_9
TEST	evm.model.Ug_unitig_0.521	DNA repair protein XRCC3 homolog	EC:3.1.31;EC:3.6.1.3;EC:3.1.22;EC:3.6.1.15;EC:3.1.22.4	L	AT5G57450.2	homolog_of_X-ray_repair_cross_complementing_3_(XRCC3)
TEST	evm.model.Ug_unitig_0.486	Triphosphate tunel metalloenzyme 3	EC:3.6.1.25;EC:3.6.1.3;EC:3.6.1.15	S	AT2G11890.1	adenylate_cyclase
TEST	evm.model.Ug_unitig_0.481	ABC transporter B family member 15-like	EC:3.6.1.3;EC:7.6.2.2;EC:3.6.1.15	Q	AT3G28345.1	ABC_transporter_family_protein
TEST	evm.model.Ug_unitig_0.477	ATPase family AAA domain-containing protein 3C-like	EC:3.6.1.3;EC:3.6.1.15;EC:3.6.4.3	O	AT2G18330.1	AAA-type_ATPase_family_protein
TEST	evm.model.Ug_unitig_0.470	Kinesin-like protein	EC:3.6.1.3;EC:3.6.1.15;EC:3.6.4.4	Z	AT3G12020.4	P-loop_containing_nucleoside_triphosphate_hydrolases_superfamily_protein
TEST	evm.model.Ug_unitig_0.431	ATP-dependent RNA helicase	EC:3.6.1.3;EC:3.6.1.15	none	AT5G09960.1	sorbin/SH3_domain_protein
TEST	evm.model.Ug_unitig_0.301	ATP-dependent zinc metalloprotease FTSH 11, chloroplastic/mitochondrial	EC:3.4.24;EC:3.6.1.3;EC:3.6.1.15	O	AT5G53170.1	FTSH_protease_11
TEST	evm.model.Ug_unitig_0.265	probable pre-mRNA-splicing factor ATP-dependent RNA helicase DEAH2 isoform X1	EC:3.6.1.3;EC:3.6.4.13;EC:3.6.1.15	A	AT3G62310.1	RNA_helicase_family_protein
TEST	evm.model.Ug_unitig_0.255	DNA replication licensing factor MCM7	EC:3.6.1.3;EC:3.6.4.12;EC:3.6.1.15	L	AT4G02060.2	Minichromosome_maintenance_(MCM2/3/5)_family_protein
TEST	evm.model.Ug_unitig_0.228	RNA helicase	EC:3.6.1.3;EC:3.6.4.13;EC:3.2.1.96;EC:3.6.1.15	A	AT5G05450.1	P-loop_containing_nucleoside_triphosphate_hydrolases_superfamily_protein
TEST	evm.model.Ug_unitig_0.162	DEAD-box ATP-dependent RNA helicase 41	EC:3.6.1.3;EC:3.6.4.13;EC:3.6.1.15	A	AT3G02065.3	P-loop_containing_nucleoside_triphosphate_hydrolases_superfamily_protein
TEST	evm.model.Ug_unitig_0.124	Calcium-transporting ATPase	EC:3.6.1.3;EC:7.2.2.10;EC:3.6.1.15	P	AT3G63380.1	ATPase_E1-E2_type_family_protein_/_haloacid_dehalogenase-like_hydrolase_family_protein
TEST	evm.model.Ug_unitig_0.96	Dna repair helicase xpd	EC:2.7.11;EC:2.7.11.23;EC:3.6.1.3;EC:3.6.4.12;EC:3.6.1.15	KL	AT1G03190.2	RAD3-like_DNA-binding_helicase_protein
TEST	evm.model.Ug_unitig_0.70	Protein chromatin remodeling 25	EC:3.6.1.3;EC:3.6.1.15	L	AT3G19210.1	DNA_repair/recombination_protein
REFERENCE	evm.model.Ug_unitig_899.1072	myosin-2-like isoform X1	EC:3.6.1.3;EC:3.6.1.15	Z	AT1G50360.1	P-loop_containing_nucleoside_triphosphate_hydrolases_superfamily_protein
REFERENCE	evm.model.Ug_unitig_899.860	ATP-dependent DNA helicase	EC:3.6.1.3;EC:3.6.4.12;EC:3.6.1.15	L	noTAIR	NULL
REFERENCE	evm.model.Ug_unitig_899.857	ATP-dependent zinc metalloprotease FTSH 2, chloroplastic	EC:3.4.24;EC:3.6.1.3;EC:3.6.1.15;EC:3.6.4.3	O	AT2G30950.3	FtsH_extracellular_protease_family
REFERENCE	evm.model.Ug_unitig_899.772	Mg-protoporphyrin IX chelatase	EC:3.6.1.3;EC:3.6.1.15;EC:6.6.1.1	F	AT5G45930.1	magnesium_chelatase_i2
REFERENCE	evm.model.Ug_unitig_899.618	DEAD-box ATP-dependent RNA helicase 37	EC:3.6.1.3;EC:3.6.4.13;EC:3.6.1.15	A	AT3G58570.1	P-loop_containing_nucleoside_triphosphate_hydrolases_superfamily_protein
REFERENCE	evm.model.Ug_unitig_899.566	cell division control protein 45 homolog	EC:3.6.1.3;EC:3.6.4.12;EC:3.6.1.15	L	AT3G25100.1	cell_division_cycle_45
REFERENCE	evm.model.Ug_unitig_899.462	calcium-transporting ATPase 4, endoplasmic reticulum-type-like	EC:3.6.1.3;EC:7.1.2.1;EC:7.2.2.10;EC:3.6.1.15	P	AT1G07670.2	endomembrane-type_CA-ATPase_4
REFERENCE	evm.model.Ug_unitig_899.399	Putative RNA helicase SDE3	EC:3.6.1.3;EC:3.6.4.13;EC:3.6.1.15	L	AT1G05460.1	P-loop_containing_nucleoside_triphosphate_hydrolases_superfamily_protein
REFERENCE	evm.model.Ug_unitig_899.245	ABC transporter G family member 5-like	EC:3.6.1.3;EC:3.6.1.15	Q	AT2G13610.1	ABC-2_type_transporter_family_protein
REFERENCE	evm.model.Ug_unitig_899.230	Eukaryotic initiation factor 4A	EC:3.6.1.3;EC:3.6.1.15	J	AT4G37020.1	initiation_factor_4A-like_protein
REFERENCE	evm.model.Ug_unitig_899.61	Phosphatidylinositol N-acetylglucosaminyltransferase subunit A like	EC:3.6.1.3;EC:3.6.1.15;EC:2.4.1.198	IMO	AT3G45100.3	UDP-Glycosyltransferase_superfamily_protein
REFERENCE	evm.model.Ug_unitig_750.98	ABC transporter A family member 7	EC:3.6.1.3;EC:3.6.1.15	Q	AT3G47780.1	ABC2_homolog_6
REFERENCE	evm.model.Ug_unitig_750.97	ABC transporter A family member 2	EC:3.6.1.3;EC:3.6.3.25;EC:7.3.2.3;EC:3.6.1.15	I	AT3G47730.1	ATP-binding_cassette_A2
REFERENCE	evm.model.Ug_unitig_750.94	Plasma membrane ATPase	EC:3.6.1.3;EC:7.1.2.1;EC:3.6.1.15	P	AT3G47950.2	H[+]-ATPase_4
REFERENCE	evm.model.Ug_unitig_750.65	DUF21 domain-containing protein	EC:3.6.1.3;EC:3.6.1.15	S	AT5G50150.1	NEP-interacting_protein%2C_putative_(DUF239)
REFERENCE	evm.model.Ug_unitig_750.45	pleiotropic drug resistance protein 2-like	EC:3.6.1.3;EC:3.6.1.15;EC:7.2.2.16	Q	AT2G36380.1	pleiotropic_drug_resistance_6
REFERENCE	evm.model.Ug_unitig_749.1073	Kinesin-like protein	EC:3.6.1.3;EC:3.6.1.15	Z	AT1G01950.1	armadillo_repeat_kinesin_2
REFERENCE	evm.model.Ug_unitig_749.942	Myosin XI	EC:3.6.1.3;EC:5.99.1.2;EC:3.6.1.15	Z	AT5G20490.2	myosin_family_protein_with_Dil
REFERENCE	evm.model.Ug_unitig_749.912	Calcium-transporting ATPase	EC:3.6.1.3;EC:7.2.2.10;EC:3.6.1.15	P	AT4G29900.2	autoinhibited_Ca(2+)-ATPase_10
REFERENCE	evm.model.Ug_unitig_749.808	ATP-dependent helicase/deoxyribonuclease subunit B	EC:3.6.1.3;EC:3.6.1.15	none	AT3G51610.1	ATP-dependent_helicase/deoxyribonuclease_subunit_B
REFERENCE	evm.model.Ug_unitig_749.733	DExH-box ATP-dependent RNA helicase DExH17 isoform X1	EC:3.6.1.3;EC:3.6.4.12;EC:3.6.4.13;EC:3.6.1.15	A	AT3G27730.7	DNA_helicase_ROCK-N-ROLLERS
REFERENCE	evm.model.Ug_unitig_749.633	endoplasmin homolog	EC:3.6.1.3;EC:3.6.1.15	O	AT4G24190.2	Chaperone_protein_htpG_family_protein
REFERENCE	evm.model.Ug_unitig_749.539	ATP-dependent DNA helicase 2 subunit KU80	EC:3.6.1.3;EC:3.6.4.12;EC:3.6.1.15	L	AT1G48050.1	Ku80_family_protein
REFERENCE	evm.model.Ug_unitig_749.485	26S proteasome regulatory subunit 4 homolog A	EC:3.6.1.3;EC:3.6.1.15	O	AT4G29040.1	regulatory_particle_AAA-ATPase_2A
REFERENCE	evm.model.Ug_unitig_749.292	myosin-2-like isoform X1	EC:3.6.1.3;EC:3.6.1.15	Z	AT5G54280.2	myosin_2
REFERENCE	evm.model.Ug_unitig_749.234	Dynein light chain	EC:3.6.1.3;EC:3.6.1.15;EC:3.6.4.4	Z	noTAIR	NULL
REFERENCE	evm.model.Ug_unitig_748.1228	V-type proton ATPase subunit	EC:3.6.1.3;EC:7.1.2.1;EC:3.6.1.15	C	AT3G28715.1	ATPase%2C_V0/A0_complex%2C_subunit_C/D
REFERENCE	evm.model.Ug_unitig_748.1211	ABC transporter B family member 27-like	EC:3.6.1.3;EC:7.6.2.2;EC:3.6.1.15	Q	AT5G39040.1	transporter_associated_with_antigen_processing_protein_2
REFERENCE	evm.model.Ug_unitig_748.1210	ABC transporter B family member 27-like	EC:3.6.1.3;EC:7.6.2.2;EC:3.6.1.15	Q	AT5G39040.1	transporter_associated_with_antigen_processing_protein_2
REFERENCE	evm.model.Ug_unitig_748.1140	Histone acetyltransferase	EC:3.6.1.3;EC:3.6.1.15	S	AT4G14920.2	Acyl-CoA_N-acyltransferase_with_RING/FYVE/PHD-type_zinc_finger_protein
REFERENCE	evm.model.Ug_unitig_748.1025	pleiotropic drug resistance protein 1-like	EC:3.6.1.3;EC:3.6.1.15	Q	AT1G15520.1	pleiotropic_drug_resistance_12
REFERENCE	evm.model.Ug_unitig_748.1024	pleiotropic drug resistance protein 1-like	EC:3.6.1.3;EC:3.6.3.25;EC:7.3.2.3;EC:3.6.1.15	Q	AT1G15520.1	pleiotropic_drug_resistance_12
REFERENCE	evm.model.Ug_unitig_748.1023	Pleiotropic drug resistance protein 1-like	EC:3.6.1.3;EC:3.6.3.25;EC:7.6.2.11;EC:7.3.2.2;EC:7.3.2.3;EC:3.6.1.15	Q	AT1G15520.2	pleiotropic_drug_resistance_12
REFERENCE	evm.model.Ug_unitig_748.1017	pleiotropic drug resistance protein 1-like	EC:3.6.1.3;EC:3.6.3.25;EC:7.3.2.3;EC:3.6.1.15	Q	AT4G15233.5	ABC-2_and_Plant_PDR_ABC-type_transporter_family_protein
REFERENCE	evm.model.Ug_unitig_748.978	Eukaryotic initiation factor 4A-3	EC:3.6.1.3;EC:3.6.4.13;EC:3.6.1.15	A	AT3G19760.1	eukaryotic_initiation_factor_4A-III
REFERENCE	evm.model.Ug_unitig_748.976	eukaryotic initiation factor 4A-3	EC:3.6.1.3;EC:3.6.4.13;EC:3.6.1.15	A	AT3G19760.1	eukaryotic_initiation_factor_4A-III
REFERENCE	evm.model.Ug_unitig_748.886	Calcium-transporting ATPase	EC:3.6.1.3;EC:7.2.2.10;EC:3.6.1.15	P	AT3G21180.1	autoinhibited_Ca(2+)-ATPase_9
REFERENCE	evm.model.Ug_unitig_748.885	Calcium-transporting ATPase	EC:3.6.1.3;EC:7.2.2.10;EC:3.6.1.15	P	AT3G21180.1	autoinhibited_Ca(2+)-ATPase_9
REFERENCE	evm.model.Ug_unitig_748.541	UPF0051 protein ABCI8, chloroplastic-like	EC:3.6.1.3;EC:3.6.1.15	O	AT4G04770.1	ATP_binding_cassette_protein_1
REFERENCE	evm.model.Ug_unitig_748.540	UPF0051 protein ABCI8, chloroplastic-like	EC:3.6.1.3;EC:3.6.1.15	O	AT4G04770.1	ATP_binding_cassette_protein_1
REFERENCE	evm.model.Ug_unitig_748.375	ABC transporter E family member 2	EC:3.6.1.3;EC:3.6.1.15	C	AT4G19210.1	RNAse_l_inhibitor_protein_2
REFERENCE	evm.model.Ug_unitig_748.145	Putative ABC transporter C family member 15	EC:3.6.1.3;EC:7.6.2.2;EC:3.6.1.15	Q	AT3G60970.1	multidrug_resistance-associated_protein_15
REFERENCE	evm.model.Ug_unitig_748.142	Abc transporter c family member 9	EC:3.6.1.3;EC:7.6.2.2;EC:3.6.1.15	Q	AT3G60160.1	multidrug_resistance-associated_protein_9
REFERENCE	evm.model.Ug_unitig_748.67	Kinesin-like protein kca2	EC:3.6.1.3;EC:3.6.4.5;EC:3.6.1.15	Z	AT5G10470.2	kinesin_like_protein_for_actin_based_chloroplast_movement_1
REFERENCE	evm.model.Ug_unitig_747.842	calcium-transporting ATPase 4, endoplasmic reticulum-type-like	EC:3.6.1.3;EC:7.1.2.1;EC:7.2.2.10;EC:3.6.1.15	P	AT1G07670.2	endomembrane-type_CA-ATPase_4
REFERENCE	evm.model.Ug_unitig_747.809	ABC transporter F family member 1-like	EC:3.6.1.3;EC:3.6.1.15	S	AT5G60790.1	ABC_transporter_family_protein
REFERENCE	evm.model.Ug_unitig_747.790	Protein translocase subunit SecA	EC:3.6.1.3;EC:3.6.1.15	none	AT3G51010.1	protein_translocase_subunit
REFERENCE	evm.model.Ug_unitig_747.697	Myosin ID heavy chain	EC:3.6.1.3;EC:3.6.1.15	S	AT5G53310.1	myosin_heavy_chain-like_protein
REFERENCE	evm.model.Ug_unitig_747.636	ABC transporter B family member 20	EC:3.6.1.3;EC:7.6.2.2;EC:3.6.1.15	Q	AT3G55320.1	P-glycoprotein_20
REFERENCE	evm.model.Ug_unitig_747.635	ABC transporter B family member 20 isoform X2	EC:3.6.1.3;EC:7.6.2.2;EC:3.6.1.15	Q	AT3G55320.1	P-glycoprotein_20
REFERENCE	evm.model.Ug_unitig_747.626	Sodium sulfate symporter	EC:3.6.3.16;EC:3.6.1.3;EC:3.6.1.15	P	AT1G02260.2	Divalent_ion_symporter
REFERENCE	evm.model.Ug_unitig_747.528	DNA mismatch repair protein MSH1, mitochondrial isoform X2	EC:3.6.1.3;EC:3.6.1.15	L	AT3G24320.1	MUTL_protein_homolog_1
REFERENCE	evm.model.Ug_unitig_747.504	meiotic recombination protein SPO11-1	EC:3.1.31;EC:3.6.1.3;EC:3.1.22;EC:5.99.1.3;EC:3.6.1.15	L	AT3G13170.1	Spo11/DNA_topoisomerase_VI%2C_subunit_A_protein
REFERENCE	evm.model.Ug_unitig_747.503	Meiotic recombination protein SPO11-1	EC:3.1.31;EC:3.6.1.3;EC:3.1.22;EC:5.99.1.3;EC:3.6.1.15	L	AT3G13170.3	Spo11/DNA_topoisomerase_VI%2C_subunit_A_protein
REFERENCE	evm.model.Ug_unitig_747.351	ATP-dependent DNA helicase mph1 isoform X1	EC:3.6.1.3;EC:3.6.4.12;EC:3.6.1.15	A	AT1G35530.1	DEAD/DEAH_box_RNA_helicase_family_protein
REFERENCE	evm.model.Ug_unitig_747.322	26S protease regulatory subunit 6B-like protein	EC:3.6.1.3;EC:3.6.1.15	O	AT5G58290.1	regulatory_particle_triple-A_ATPase_3
REFERENCE	evm.model.Ug_unitig_747.251	DNA gyrase subunit A, chloroplastic/mitochondrial	EC:3.6.1.3;EC:5.99.1.3;EC:3.6.1.15	B	AT3G10690.1	DNA_GYRASE_A
REFERENCE	evm.model.Ug_unitig_747.170	26S protease regulatory subunit 6A homolog	EC:3.6.1.3;EC:3.6.1.15	O	AT3G05530.1	regulatory_particle_triple-A_ATPase_5A
REFERENCE	evm.model.Ug_unitig_747.110	Kinesin-like protein kin-7d, mitochondrial	EC:3.6.1.3;EC:3.6.1.15;EC:3.6.4.4	Z	AT4G39050.1	Kinesin_motor_family_protein
REFERENCE	evm.model.Ug_unitig_746.324	Kinesin-like protein	EC:3.6.1.3;EC:3.6.1.15;EC:3.6.4.4	Z	AT4G14330.1	P-loop_containing_nucleoside_triphosphate_hydrolases_superfamily_protein
REFERENCE	evm.model.Ug_unitig_746.267	myosin-2-like isoform X1	EC:3.6.1.3;EC:3.6.1.15	Z	AT5G54280.2	myosin_2
REFERENCE	evm.model.Ug_unitig_746.190	Mg-protoporphyrin IX chelatase	EC:3.6.1.3;EC:3.6.1.15;EC:6.6.1.1	F	AT5G45930.1	magnesium_chelatase_i2
REFERENCE	evm.model.Ug_unitig_746.118	ATP-dependent zinc metalloprotease FTSH 2, chloroplastic	EC:3.4.24;EC:3.6.1.3;EC:3.6.1.15;EC:3.6.4.3	O	AT2G30950.3	FtsH_extracellular_protease_family
REFERENCE	evm.model.Ug_unitig_746.36	Mitochondrial import inner membrane translocase subunit TIM44-2	EC:3.6.1.3;EC:7.4.2.3;EC:7.4.2.4;EC:7.4.2.5;EC:3.6.1.15	U	AT2G36070.1	translocase_inner_membrane_subunit_44-2
REFERENCE	evm.model.Ug_unitig_744.630	Heat shock cognate 70 kDa protein 2-like	EC:1.3.1.74;EC:3.6.1.3;EC:3.6.1.15	O	AT5G02500.1	heat_shock_cognate_protein_70-1
REFERENCE	evm.model.Ug_unitig_744.488	Putative WD repeat-containing protein C2A9.03 isoform A	EC:3.6.1.3;EC:3.6.1.15;EC:3.6.4.3	S	AT3G13340.3	Transducin/WD40_repeat-like_superfamily_protein
REFERENCE	evm.model.Ug_unitig_744.412	Pre-mRNA-splicing factor ATP-dependent RNA helicase DEAH7	EC:3.6.1.3;EC:3.6.1.15	S	AT5G13010.1	RNA_helicase_family_protein
REFERENCE	evm.model.Ug_unitig_744.411	pre-mRNA-splicing factor ATP-dependent RNA helicase DEAH7	EC:3.6.1.3;EC:3.6.4.13;EC:3.6.1.15	A	AT5G13010.1	RNA_helicase_family_protein
REFERENCE	evm.model.Ug_unitig_744.282	F-box protein skip23	EC:3.6.1.3;EC:3.6.4.12;EC:3.6.1.15	S	AT2G17030.1	F-box_SKIP23-like_protein_(DUF295)
REFERENCE	evm.model.Ug_unitig_744.258	V-type proton ATPase subunit a	EC:7.1.3.1;EC:3.6.1.3;EC:7.1.2.1;EC:3.6.1.15	P	AT4G39080.1	vacuolar_proton_ATPase_A3
REFERENCE	evm.model.Ug_unitig_744.118	Kinesin-like protein	EC:3.6.1.3;EC:3.6.1.15;EC:3.6.4.4	Z	AT5G60930.3	P-loop_containing_nucleoside_triphosphate_hydrolases_superfamily_protein
REFERENCE	evm.model.Ug_unitig_744.18	type 2 DNA topoisomerase 6 subunit B-like	EC:3.6.1.3;EC:5.99.1.3;EC:3.6.1.15	none	AT1G60460.2	hypothetical_protein
REFERENCE	evm.model.Ug_unitig_736.459	ABC transporter G family member 5-like	EC:3.6.1.3;EC:3.6.1.15	Q	AT2G13610.1	ABC-2_type_transporter_family_protein
REFERENCE	evm.model.Ug_unitig_736.242	calcium-transporting ATPase 4, endoplasmic reticulum-type-like	EC:3.6.1.3;EC:7.1.2.1;EC:7.2.2.10;EC:3.6.1.15	P	AT1G07670.2	endomembrane-type_CA-ATPase_4
REFERENCE	evm.model.Ug_unitig_736.230	Adenylate kinase isoenzyme 6 homolog	EC:2.7.4.4;EC:2.7.4.3;EC:3.6.1.3;EC:3.1.11;EC:3.1.15;EC:3.6.1.15	F	AT5G60340.1	P-loop_containing_nucleoside_triphosphate_hydrolases_superfamily_protein
REFERENCE	evm.model.Ug_unitig_736.154	cell division control protein 45 homolog	EC:3.6.1.3;EC:3.6.4.12;EC:3.6.1.15	L	AT3G25100.1	cell_division_cycle_45
REFERENCE	evm.model.Ug_unitig_736.122	DEAD-box ATP-dependent RNA helicase 37-like	EC:3.6.1.3;EC:3.6.4.13;EC:3.6.1.15	A	AT2G42520.3	P-loop_containing_nucleoside_triphosphate_hydrolases_superfamily_protein
REFERENCE	evm.model.Ug_unitig_699.789	Kinesin-like protein	EC:3.6.1.3;EC:3.6.1.15;EC:3.6.4.4	Z	AT4G39050.1	Kinesin_motor_family_protein
REFERENCE	evm.model.Ug_unitig_699.742	26S protease regulatory subunit 6A homolog	EC:3.6.1.3;EC:3.6.1.15	O	AT3G05530.1	regulatory_particle_triple-A_ATPase_5A
REFERENCE	evm.model.Ug_unitig_699.460	ATP synthase subunit beta	EC:3.6.1.3;EC:3.6.1.15	C	AT5G08680.1	ATP_synthase_alpha/beta_family_protein
REFERENCE	evm.model.Ug_unitig_699.459	ATP synthase subunit beta	EC:3.6.1.3;EC:3.6.1.15	C	AT5G08680.1	ATP_synthase_alpha/beta_family_protein
REFERENCE	evm.model.Ug_unitig_699.423	Nucleotidylyl transferase superfamily protein	EC:2.7.7.1;EC:3.6.1.3;EC:3.6.1.15	S	AT2G01220.2	Nucleotidylyl_transferase_superfamily_protein
REFERENCE	evm.model.Ug_unitig_699.394	V-type proton ATPase subunit E-like	EC:3.6.1.3;EC:7.1.2.1;EC:3.6.1.15	C	AT4G11150.1	vacuolar_ATP_synthase_subunit_E1
REFERENCE	evm.model.Ug_unitig_699.286	Alba-like protein C9orf23	EC:3.1.30;EC:3.6.1.3;EC:3.1.26;EC:3.1.26.5;EC:3.6.1.15	S	AT3G07030.5	Alba_DNA/RNA-binding_protein
REFERENCE	evm.model.Ug_unitig_699.189	Putative ovule protein	EC:3.6.1.3;EC:3.6.1.15	none	AT1G53035.1	transmembrane_protein
REFERENCE	evm.model.Ug_unitig_699.158	cell division cycle protein 48 homolog	EC:3.6.1.3;EC:3.6.1.15;EC:3.6.4.3	O	AT5G03340.1	ATPase%2C_AAA-type%2C_CDC48_protein
REFERENCE	evm.model.Ug_unitig_578.863	DEAD-box ATP-dependent RNA helicase 24	EC:3.6.1.3;EC:3.6.1.15	S	AT2G47330.1	P-loop_containing_nucleoside_triphosphate_hydrolases_superfamily_protein
REFERENCE	evm.model.Ug_unitig_578.845	ATP-dependent DNA helicase SRS2-like protein At4g25120	EC:3.6.1.3;EC:3.6.4.12;EC:3.6.1.15	L	AT4G25120.1	P-loop_containing_nucleoside_triphosphate_hydrolases_superfamily_protein
REFERENCE	evm.model.Ug_unitig_578.806	Eukaryotic initiation factor 4A-11	EC:3.6.1.3;EC:3.6.1.15	A	AT3G13920.1	eukaryotic_translation_initiation_factor_4A1
REFERENCE	evm.model.Ug_unitig_578.801	DEAD-box ATP-dependent RNA helicase 56	EC:3.6.1.3;EC:3.6.1.15	A	AT5G11200.1	DEAD/DEAH_box_RNA_helicase_family_protein
REFERENCE	evm.model.Ug_unitig_578.791	Calcium-transporting ATPase	EC:3.6.1.3;EC:7.2.2.10;EC:3.6.1.15	P	AT1G27770.4	autoinhibited_Ca2+-ATPase_1
REFERENCE	evm.model.Ug_unitig_578.731	ABC transporter G family member 22	EC:3.6.1.3;EC:7.3.2.5;EC:3.6.1.15	Q	AT5G06530.2	ABC-2_type_transporter_family_protein
REFERENCE	evm.model.Ug_unitig_578.684	Phytochelatin synthase	EC:3.6.3.16;EC:3.6.1.3;EC:2.3.2.15;EC:3.6.1.15	P	AT5G44070.1	phytochelatin_synthase_1_(PCS1)
REFERENCE	evm.model.Ug_unitig_578.671	DNA repair protein recA homolog 3, mitochondrial-like	EC:3.6.1.3;EC:3.6.1.8;EC:3.6.1.19;EC:3.6.1.15	L	AT2G19490.1	recA_DNA_recombination_family_protein
REFERENCE	evm.model.Ug_unitig_578.550	heat shock cognate 70 kDa protein	EC:3.6.1.3;EC:3.6.1.15	O	AT3G12580.1	heat_shock_protein_70
REFERENCE	evm.model.Ug_unitig_578.378	Glycine-rich protein	EC:3.6.1.3;EC:3.6.1.15	none	AT4G10330.1	glycine-rich_protein
REFERENCE	evm.model.Ug_unitig_578.242	protein CMSS1-like	EC:3.6.1.3;EC:3.6.1.15	S	AT2G43110.1	U3_containing_90S_pre-ribosomal_complex_subunit
REFERENCE	evm.model.Ug_unitig_92.177	AAA-ATPase At2g46620-like	EC:3.6.1.3;EC:3.6.1.15	O	AT2G46620.1	P-loop_containing_nucleoside_triphosphate_hydrolases_superfamily_protein
REFERENCE	evm.model.Ug_unitig_92.117	twinkle homolog protein, chloroplastic/mitochondrial	EC:3.6.1.3;EC:3.6.4.12;EC:2.7.7.6;EC:3.6.1.15	L	AT1G30680.1	toprim_domain-containing_protein
REFERENCE	evm.model.Ug_unitig_92.82	TATA-binding protein-associated factor BTAF1-like	EC:3.6.1.3;EC:3.6.1.15	K	AT3G54280.1	ROOT_GROWTH_DEFECTIVE_3
REFERENCE	evm.model.Ug_unitig_90.31	ABC-2 type transporter family protein isoform 1	EC:3.6.1.3;EC:3.6.1.15	Q	AT3G21090.1	ABC-2_type_transporter_family_protein
REFERENCE	evm.model.Ug_unitig_88.150	Heat shock cognate 70 kDa protein 2-like	EC:1.3.1.74;EC:3.6.1.3;EC:3.6.1.15	O	AT5G02500.1	heat_shock_cognate_protein_70-1
REFERENCE	evm.model.Ug_unitig_88.118	Kinesin-like protein	EC:3.6.1.3;EC:3.6.1.15;EC:3.6.4.4	Z	AT3G49650.1	P-loop_containing_nucleoside_triphosphate_hydrolases_superfamily_protein
REFERENCE	evm.model.Ug_unitig_88.114	Kinesin-like protein	EC:3.6.1.3;EC:3.6.1.15	Z	AT3G16630.2	P-loop_containing_nucleoside_triphosphate_hydrolases_superfamily_protein
REFERENCE	evm.model.Ug_unitig_88.13	DNA repair protein RadA-like isoform X1	EC:3.6.1.3;EC:3.6.1.15	L	AT5G50340.2	DNA_repair_protein_RadA-like_protein
REFERENCE	evm.model.Ug_unitig_85.195	Transmembrane protein	EC:3.6.1.3;EC:3.6.1.15	V	AT5G55960.1	transmembrane_protein_C9orf5_protein
REFERENCE	evm.model.Ug_unitig_85.189	ABC transporter C family member 3	EC:3.6.1.3;EC:3.6.1.15	Q	AT3G13080.1	multidrug_resistance-associated_protein_3
REFERENCE	evm.model.Ug_unitig_85.187	DUF21 domain-containing protein	EC:3.6.1.3;EC:3.6.1.15	P	AT3G13070.1	CBS_domain-containing_protein_/_transporter_associated_domain-containing_protein
REFERENCE	evm.model.Ug_unitig_85.186	ABC transporter C family member 3	EC:3.6.1.3;EC:3.6.1.15	Q	AT3G13080.1	multidrug_resistance-associated_protein_3
REFERENCE	evm.model.Ug_unitig_85.40	DEAD-box ATP-dependent RNA helicase 24	EC:3.6.1.3;EC:3.6.4.13;EC:3.6.1.15	A	noTAIR	NULL
REFERENCE	evm.model.Ug_unitig_85.39	DEAD-box ATP-dependent RNA helicase	EC:3.6.1.3;EC:3.6.4.13;EC:3.6.1.15	A	AT2G47330.1	P-loop_containing_nucleoside_triphosphate_hydrolases_superfamily_protein
REFERENCE	evm.model.Ug_unitig_63.9	Dead-box atp-dependent rna helicase 35	EC:3.6.1.3;EC:3.6.4.13;EC:3.6.1.15	A	AT5G51280.1	DEAD-box_protein_abstrakt
REFERENCE	evm.model.Ug_unitig_62.766	Eceriferum 5 (Fragment)	EC:3.6.1.3;EC:7.3.2.5;EC:7.3.2.2;EC:3.6.1.15	Q	AT3G21090.1	ABC-2_type_transporter_family_protein
REFERENCE	evm.model.Ug_unitig_62.765	ABC transporter G family member 15-like	EC:3.6.1.3;EC:3.6.1.15	Q	AT3G21090.1	ABC-2_type_transporter_family_protein
REFERENCE	evm.model.Ug_unitig_62.764	Eceriferum 5 (Fragment)	EC:3.6.1.3;EC:3.6.1.15	Q	AT3G21090.1	ABC-2_type_transporter_family_protein
REFERENCE	evm.model.Ug_unitig_62.660	Kinesin-like protein	EC:3.6.1.3;EC:3.6.1.15	Z	AT3G16060.1	ATP_binding_microtubule_motor_family_protein
REFERENCE	evm.model.Ug_unitig_62.489	Dead-box atp-dependent rna helicase 35	EC:3.6.1.3;EC:3.6.4.13;EC:3.6.1.15	A	AT5G51280.1	DEAD-box_protein_abstrakt
REFERENCE	evm.model.Ug_unitig_62.440	DNA repair helicase XPB1	EC:2.7.11;EC:2.7.11.23;EC:3.6.1.3;EC:3.6.4.12;EC:3.6.1.15	KL	AT5G41360.2	homolog_of_Xeroderma_pigmentosum_complementation_group_B_2
REFERENCE	evm.model.Ug_unitig_62.439	DNA repair helicase XPB1	EC:2.7.11;EC:2.7.11.23;EC:3.6.1.3;EC:3.6.4.12;EC:3.6.1.15	KL	AT5G41370.1	DNA_repair_helicase_XPB1-like_protein
REFERENCE	evm.model.Ug_unitig_62.274	ATP-dependent RNA helicase	EC:2.7.11;EC:3.6.1.3;EC:3.6.4.13;EC:3.6.1.15	A	AT5G14610.2	DEAD_box_RNA_helicase_family_protein
REFERENCE	evm.model.Ug_unitig_62.237	Transmembrane protein	EC:3.6.1.3;EC:3.6.1.15	V	AT5G55960.1	transmembrane_protein_C9orf5_protein
REFERENCE	evm.model.Ug_unitig_62.183	DEAD-box ATP-dependent RNA helicase 53-like	EC:3.6.1.3;EC:3.6.4.13;EC:3.6.1.15	A	AT3G22330.1	putative_mitochondrial_RNA_helicase_2
REFERENCE	evm.model.Ug_unitig_61.353	DEAD-box ATP-dependent RNA helicase 8	EC:3.6.1.3;EC:3.6.4.13;EC:3.6.1.15	A	AT4G00660.2	RNAhelicase-like_8
REFERENCE	evm.model.Ug_unitig_61.342	Ribosomal RNA-processing protein	EC:3.6.1.3;EC:3.6.1.15	A	AT5G38720.1	ribosomal_RNA-processing_7_protein
REFERENCE	evm.model.Ug_unitig_61.252	V-type proton ATPase subunit H	EC:3.6.1.3;EC:7.1.2.1;EC:3.6.1.15	C	AT3G42050.1	vacuolar_ATP_synthase_subunit_H_family_protein
REFERENCE	evm.model.Ug_unitig_61.240	Katanin p60 ATPase-containing subunit A1	EC:3.6.1.3;EC:3.6.1.15;EC:3.6.4.3	O	AT1G80350.1	P-loop_containing_nucleoside_triphosphate_hydrolases_superfamily_protein
REFERENCE	evm.model.Ug_unitig_61.197	V-type proton ATPase subunit C	EC:3.6.1.3;EC:7.1.2.1;EC:3.6.1.15	C	AT1G12840.1	vacuolar_ATP_synthase_subunit_C_(VATC)_/_V-ATPase_C_subunit_/_vacuolar_proton_pump_C_subunit_(DET3)
REFERENCE	evm.model.Ug_unitig_61.129	probable RNA polymerase II transcription factor B subunit 1-1	EC:2.7.11;EC:2.7.11.23;EC:3.6.1.3;EC:3.6.1.15	KL	AT1G55750.6	BSD_domain_(BTF2-like_transcription_factors%2C_Synapse-associated_proteins_and_DOS2-like_proteins)
REFERENCE	evm.model.Ug_unitig_61.61	heat shock 70 kDa protein, mitochondrial	EC:3.6.1.3;EC:3.6.1.15	O	AT5G09590.1	mitochondrial_HSO70_2
REFERENCE	evm.model.Ug_unitig_61.21	ABC transporter I family member 10, chloroplastic-like	EC:3.6.1.3;EC:3.6.1.15	Q	AT4G33460.1	ABC_transporter_family_protein
REFERENCE	evm.model.Ug_unitig_60.337	probable pre-mRNA-splicing factor ATP-dependent RNA helicase DEAH9 isoform X1	EC:3.6.1.3;EC:3.6.4.13;EC:3.6.1.15	A	AT4G18465.1	RNA_helicase_family_protein
REFERENCE	evm.model.Ug_unitig_60.220	ATP-dependent Clp protease proteolytic subunit	EC:3.4.21;EC:3.6.1.3;EC:3.6.1.15	O	AT1G02560.1	nuclear_encoded_CLP_protease_5
REFERENCE	evm.model.Ug_unitig_60.215	ABC transporter G family member 15-like	EC:3.6.1.3;EC:7.3.2.5;EC:3.6.1.15	Q	AT3G21090.1	ABC-2_type_transporter_family_protein
REFERENCE	evm.model.Ug_unitig_60.191	Plasma membrane ATPase	EC:3.6.1.3;EC:7.1.2.1;EC:3.6.1.15	P	AT1G80660.1	H[+]-ATPase_9
REFERENCE	evm.model.Ug_unitig_60.81	AAA+-type ATPase	EC:3.6.1.3;EC:3.6.1.15	O	AT5G57480.1	P-loop_containing_nucleoside_triphosphate_hydrolases_superfamily_protein
REFERENCE	evm.model.Ug_unitig_60.38	phragmoplast orienting kinesin 2	EC:3.6.1.3;EC:3.6.1.15	Z	AT3G19050.1	phragmoplast_orienting_kinesin_2
REFERENCE	evm.model.Ug_unitig_52.747	DEAD-box ATP-dependent RNA helicase 14	EC:2.7.11;EC:3.6.1.3;EC:3.6.4.13;EC:3.6.1.15	A	AT5G14610.2	DEAD_box_RNA_helicase_family_protein
REFERENCE	evm.model.Ug_unitig_52.467	sister chromatid cohesion protein DCC1	EC:3.6.1.3;EC:3.6.1.15	D	AT2G44580.2	zinc_ion_binding_protein
REFERENCE	evm.model.Ug_unitig_52.449	Kinesin-like protein	EC:3.6.1.3;EC:3.6.1.15	Z	AT4G21270.1	kinesin_1
REFERENCE	evm.model.Ug_unitig_52.413	DEAD-box ATP-dependent RNA helicase 53-like	EC:3.6.1.3;EC:3.6.4.13;EC:3.6.1.15	A	AT3G22330.1	putative_mitochondrial_RNA_helicase_2
REFERENCE	evm.model.Ug_unitig_52.203	Kinesin-like protein	EC:3.6.1.3;EC:3.6.1.15	Z	AT3G16060.1	ATP_binding_microtubule_motor_family_protein
REFERENCE	evm.model.Ug_unitig_52.75	ABC transporter G family member 15-like	EC:3.6.1.3;EC:3.6.1.15	Q	AT3G21090.1	ABC-2_type_transporter_family_protein
REFERENCE	evm.model.Ug_unitig_46.588	V-type proton ATPase subunit G	EC:3.6.1.3;EC:7.1.2.1;EC:3.6.1.15	C	AT4G23710.1	vacuolar_ATP_synthase_subunit_G2
REFERENCE	evm.model.Ug_unitig_46.172	DNA repair protein XRCC2 homolog isoform X1	EC:3.6.1.3;EC:3.6.1.15	L	AT5G64520.5	homolog_of_X-ray_repair_cross_complementing_2_(XRCC2)
REFERENCE	evm.model.Ug_unitig_46.91	Putative helicase MAGATAMA 3	EC:3.6.1.3;EC:3.6.1.15	A	AT4G30100.2	P-loop_containing_nucleoside_triphosphate_hydrolases_superfamily_protein
REFERENCE	evm.model.Ug_unitig_46.15	ATP-dependent zinc metalloprotease FTSH 4, mitochondrial-like	EC:3.4.24;EC:3.6.1.3;EC:3.6.1.15;EC:3.6.4.3	O	AT2G26140.1	FTSH_protease_4
REFERENCE	evm.model.Ug_unitig_41.11	Putative rna helicase sde3	EC:3.6.1.3;EC:3.6.4.13;EC:3.6.1.15	L	AT1G05460.1	P-loop_containing_nucleoside_triphosphate_hydrolases_superfamily_protein
REFERENCE	evm.model.Ug_unitig_37.947	Eukaryotic initiation factor 4A-2	EC:3.6.1.3;EC:3.6.1.15	A	AT3G13920.1	eukaryotic_translation_initiation_factor_4A1
REFERENCE	evm.model.Ug_unitig_37.944	Eukaryotic initiation factor 4a-14	EC:3.6.1.3;EC:3.6.1.15	A	AT3G13920.1	eukaryotic_translation_initiation_factor_4A1
REFERENCE	evm.model.Ug_unitig_37.812	DNA replication complex GINS protein SLD5	EC:3.6.1.3;EC:3.6.4.12;EC:3.6.1.15	L	AT5G49010.1	DNA_replication_protein-like_protein
REFERENCE	evm.model.Ug_unitig_37.383	V-type proton ATPase subunit G	EC:3.6.1.3;EC:7.1.2.1;EC:3.6.1.15	C	AT4G23710.1	vacuolar_ATP_synthase_subunit_G2
REFERENCE	evm.model.Ug_unitig_37.311	Kinesin kp1	EC:3.6.1.3;EC:3.6.1.15	Z	noTAIR	NULL
REFERENCE	evm.model.Ug_unitig_37.304	meiotic recombination protein SPO11-2	EC:3.1.31;EC:3.6.1.3;EC:3.1.22;EC:5.99.1.3;EC:3.6.1.15	L	AT1G63990.1	sporulation_11-2
REFERENCE	evm.model.Ug_unitig_37.215	probable inactive ATP-dependent zinc metalloprotease FTSHI 1, chloroplastic	EC:3.6.1.3;EC:3.6.1.15	O	AT4G23940.1	FtsH_extracellular_protease_family
REFERENCE	evm.model.Ug_unitig_37.76	AAA-ATPase At2g46620-like	EC:3.6.1.3;EC:3.6.1.15	O	AT2G46620.1	P-loop_containing_nucleoside_triphosphate_hydrolases_superfamily_protein
REFERENCE	evm.model.Ug_unitig_37.72	Clp protease regulatory subunit clpx1, mitochondrial	EC:3.6.1.3;EC:3.6.1.15	O	AT5G53350.1	CLP_protease_regulatory_subunit_X
REFERENCE	evm.model.Ug_unitig_37.59	putative septum site-determining protein minD homolog, chloroplastic	EC:3.6.1.3;EC:3.6.1.15	D	AT5G24020.1	septum_site-determining_protein_(MIND)
REFERENCE	evm.model.Ug_unitig_32.947	Chromatin structure-remodeling complex protein SYD	EC:3.6.1.3;EC:3.6.4.12;EC:3.6.1.15	BK	AT2G28290.6	P-loop_containing_nucleoside_triphosphate_hydrolases_superfamily_protein
REFERENCE	evm.model.Ug_unitig_32.574	probable LRR receptor-like serine/threonine-protein kinase At3g47570	EC:2.7.11;EC:3.6.1.3;EC:3.6.1.15	T	AT3G47090.1	Leucine-rich_repeat_protein_kinase_family_protein
REFERENCE	evm.model.Ug_unitig_32.391	protein strawberry notch-like	EC:3.6.1.3;EC:3.6.1.15	KT	AT1G79350.1	RING/FYVE/PHD_zinc_finger_superfamily_protein
REFERENCE	evm.model.Ug_unitig_32.277	eukaryotic initiation factor 4A-3	EC:3.6.1.3;EC:3.6.4.13;EC:3.6.1.15	A	AT3G19760.1	eukaryotic_initiation_factor_4A-III
REFERENCE	evm.model.Ug_unitig_32.160	Histone acetyltransferase	EC:3.6.1.3;EC:3.6.1.15	S	AT4G14920.2	Acyl-CoA_N-acyltransferase_with_RING/FYVE/PHD-type_zinc_finger_protein
REFERENCE	evm.model.Ug_unitig_32.103	ABC transporter B family member 27-like	EC:3.6.1.3;EC:7.6.2.2;EC:3.6.1.15	Q	AT5G39040.1	transporter_associated_with_antigen_processing_protein_2
REFERENCE	evm.model.Ug_unitig_32.43	Heat shock protein 70	EC:3.6.1.3;EC:3.6.1.15	O	AT3G12580.1	heat_shock_protein_70
REFERENCE	evm.model.Ug_unitig_27.525	Kinesin-like protein	EC:3.6.1.3;EC:3.6.1.15	Z	AT2G21300.5	ATP_binding_microtubule_motor_family_protein
REFERENCE	evm.model.Ug_unitig_27.505	Katanin p80 WD40 repeat-containing subunit B1 homolog	EC:3.6.1.3;EC:3.6.1.15;EC:3.6.4.3	Z	AT5G23430.1	Transducin/WD40_repeat-like_superfamily_protein
REFERENCE	evm.model.Ug_unitig_27.474	ATP synthase subunit beta	EC:3.6.1.3;EC:3.6.1.15	C	AT5G08680.1	ATP_synthase_alpha/beta_family_protein
REFERENCE	evm.model.Ug_unitig_27.356	V-type proton atpase subunit e	EC:3.6.1.3;EC:7.1.2.1;EC:3.6.1.15	C	AT1G64200.1	vacuolar_H+-ATPase_subunit_E_isoform_3
REFERENCE	evm.model.Ug_unitig_27.290	DNA replication complex GINS protein PSF2	EC:3.6.1.3;EC:3.6.4.12;EC:3.6.1.15	L	AT3G12530.3	PSF2
REFERENCE	evm.model.Ug_unitig_27.281	Cell division cycle protein 48-like protein	EC:3.6.1.3;EC:3.6.1.15;EC:3.6.4.3	O	AT5G03340.1	ATPase%2C_AAA-type%2C_CDC48_protein
REFERENCE	evm.model.Ug_unitig_26.1410	Phospholipid-transporting ATPase	EC:3.6.1.3;EC:7.6.2.1;EC:3.6.1.15	P	AT1G68710.2	ATPase_E1-E2_type_family_protein_/_haloacid_dehalogenase-like_hydrolase_family_protein
REFERENCE	evm.model.Ug_unitig_26.1262	Serine/threonine-protein kinase	EC:2.7.11;EC:3.6.1.3;EC:5.99.1.3;EC:3.6.1.15	T	AT3G07070.1	Protein_kinase_superfamily_protein
REFERENCE	evm.model.Ug_unitig_26.1258	26S protease regulatory subunit 4-like protein	EC:3.6.1.3;EC:3.6.1.15	O	AT4G29040.1	regulatory_particle_AAA-ATPase_2A
REFERENCE	evm.model.Ug_unitig_26.1138	Kinesin-like protein	EC:3.6.1.3;EC:3.6.1.15	Z	AT5G27550.2	P-loop_containing_nucleoside_triphosphate_hydrolases_superfamily_protein
REFERENCE	evm.model.Ug_unitig_26.1036	endoplasmin homolog	EC:3.6.1.3;EC:3.6.1.15	O	AT4G24190.1	Chaperone_protein_htpG_family_protein
REFERENCE	evm.model.Ug_unitig_26.994	V-type proton ATPase proteolipid subunit	EC:3.6.1.3;EC:7.1.2.1;EC:3.6.1.15	C	AT4G34720.2	ATPase%2C_F0/V0_complex%2C_subunit_C_protein
REFERENCE	evm.model.Ug_unitig_26.954	ATP-dependent zinc metalloprotease FTSH 5, mitochondrial	EC:3.4.24;EC:3.6.1.3;EC:3.6.1.15;EC:3.6.4.3	O	AT2G26140.1	FTSH_protease_4
REFERENCE	evm.model.Ug_unitig_26.797	Dynein light chain LC6, flagellar outer arm	EC:3.6.1.3;EC:3.6.1.15;EC:3.6.4.4	Z	AT5G20110.1	Dynein_light_chain_type_1_family_protein
REFERENCE	evm.model.Ug_unitig_26.709	myosin-2-like isoform X2	EC:3.6.1.3;EC:3.6.1.15	Z	AT5G54280.2	myosin_2
REFERENCE	evm.model.Ug_unitig_26.594	ATP-dependent DNA helicase	EC:3.6.1.3;EC:3.6.4.12;EC:3.6.1.15	L	AT4G35740.2	DEAD/DEAH_box_RNA_helicase_family_protein
REFERENCE	evm.model.Ug_unitig_26.509	Kinesin-like protein	EC:3.6.1.3;EC:3.6.1.15	Z	AT1G01950.1	armadillo_repeat_kinesin_2
REFERENCE	evm.model.Ug_unitig_26.365	myosin-17-like isoform X1	EC:3.6.1.3;EC:3.6.1.15	Z	AT5G20490.2	myosin_family_protein_with_Dil
REFERENCE	evm.model.Ug_unitig_26.329	Calcium-transporting ATPase	EC:3.6.1.3;EC:7.2.2.10;EC:3.6.1.15	P	AT4G29900.2	autoinhibited_Ca(2+)-ATPase_10
REFERENCE	evm.model.Ug_unitig_26.48	pleiotropic drug resistance protein 2-like	EC:3.6.1.3;EC:3.6.1.15;EC:7.2.2.16	Q	AT1G66950.1	pleiotropic_drug_resistance_11
REFERENCE	evm.model.Ug_unitig_26.26	DUF21 domain-containing protein	EC:3.6.1.3;EC:3.6.1.15	S	AT5G50150.1	NEP-interacting_protein%2C_putative_(DUF239)
REFERENCE	evm.model.Ug_unitig_26.6	Dynein light chain, cytoplasmic	EC:3.6.1.3;EC:3.6.1.15;EC:3.6.4.4	Z	AT5G20110.1	Dynein_light_chain_type_1_family_protein
REFERENCE	evm.model.Ug_unitig_22.1525	DExH-box ATP-dependent RNA helicase DExH9	EC:3.6.1.3;EC:3.6.4.13;EC:3.6.1.15	A	AT1G59760.1	RNA_helicase%2C_ATP-dependent%2C_SK12/DOB1_protein
REFERENCE	evm.model.Ug_unitig_22.1440	Putative allantoinase	EC:3.6.1.3;EC:3.5.2.5;EC:3.6.1.15	F	AT4G04955.1	allantoinase
REFERENCE	evm.model.Ug_unitig_22.1361	Ribulose bisphosphate carboxylase/oxygenase activase 2, chloroplastic	EC:3.6.1.3;EC:3.6.1.15	O	AT2G39730.3	rubisco_activase
REFERENCE	evm.model.Ug_unitig_22.1254	DExH-box ATP-dependent RNA helicase DExH10	EC:3.6.1.3;EC:3.6.4.13;EC:3.6.1.15	A	AT2G06990.1	RNA_helicase%2C_ATP-dependent%2C_SK12/DOB1_protein
REFERENCE	evm.model.Ug_unitig_22.878	Dead-box atp-dependent rna helicase 3, chloroplastic	EC:3.6.1.3;EC:3.6.4.13;EC:3.6.1.15	A	AT5G26742.1	DEAD_box_RNA_helicase_(RH3)
REFERENCE	evm.model.Ug_unitig_22.860	stromal 70 kDa heat shock-related protein, chloroplastic	EC:3.6.1.3;EC:3.6.1.15	O	AT5G49910.1	chloroplast_heat_shock_protein_70-2
REFERENCE	evm.model.Ug_unitig_22.249	ATP-dependent helicase BRM	EC:3.6.1.3;EC:3.6.1.15	A	noTAIR	NULL
REFERENCE	evm.model.Ug_unitig_22.248	ATP-dependent helicase BRM	EC:3.6.1.3;EC:3.6.1.15	A	AT2G46020.4	transcription_regulatory_protein_SNF2
REFERENCE	evm.model.Ug_unitig_22.228	DNA topoisomerase 2	EC:3.6.1.3;EC:5.99.1.3;EC:3.6.1.15	B	AT3G23890.2	topoisomerase_II
REFERENCE	evm.model.Ug_unitig_22.218	Abc transporter g family member 11	EC:3.6.1.3;EC:3.6.3.25;EC:7.3.2.2;EC:7.3.2.3;EC:3.6.1.15	Q	AT1G17840.1	white-brown_complex-like_protein
REFERENCE	evm.model.Ug_unitig_22.181	V-type proton ATPase subunit F	EC:3.6.1.3;EC:3.6.1.15	C	AT4G02620.1	vacuolar_ATPase_subunit_F_family_protein
REFERENCE	evm.model.Ug_unitig_22.143	Midasin	EC:3.6.1.3;EC:3.6.1.15	S	AT1G67120.1	midasin-like_protein
REFERENCE	evm.model.Ug_unitig_21.910	Heat shock cognate 70 kDa protein 2-like	EC:3.6.1.3;EC:3.6.1.15	O	AT5G02500.1	heat_shock_cognate_protein_70-1
REFERENCE	evm.model.Ug_unitig_21.711	V-type proton ATPase subunit a	EC:7.1.3.1;EC:3.6.1.3;EC:7.1.2.1;EC:3.6.1.15	P	AT4G39080.1	vacuolar_proton_ATPase_A3
REFERENCE	evm.model.Ug_unitig_21.535	Kinesin-like protein	EC:3.6.1.3;EC:3.6.1.15;EC:3.6.4.4	Z	AT5G60930.3	P-loop_containing_nucleoside_triphosphate_hydrolases_superfamily_protein
REFERENCE	evm.model.Ug_unitig_21.389	Rna polymerase ii transcription factor b subunit 4	EC:2.7.11;EC:2.7.11.23;EC:3.6.1.3;EC:3.6.1.15	KL	AT1G18340.1	basal_transcription_factor_complex_subunit-like_protein
REFERENCE	evm.model.Ug_unitig_21.344	probable pre-mRNA-splicing factor ATP-dependent RNA helicase DEAH4 isoform X1	EC:3.6.1.3;EC:3.6.4.13;EC:3.6.1.15	A	AT1G27900.1	RNA_helicase_family_protein
REFERENCE	evm.model.Ug_unitig_21.206	Putative WD repeat-containing protein C2A9.03 isoform A	EC:3.6.1.3;EC:3.6.1.15;EC:3.6.4.3	S	AT3G13340.3	Transducin/WD40_repeat-like_superfamily_protein
REFERENCE	evm.model.Ug_unitig_21.66	ATP-dependent RNA helicase	EC:3.6.1.3;EC:3.6.1.15	none	AT1G53035.1	transmembrane_protein
REFERENCE	evm.model.Ug_unitig_9.4	26S proteasome regulatory complex, ATPase RPT4	EC:3.6.1.3;EC:3.6.1.15	O	AT1G45000.1	AAA-type_ATPase_family_protein
REFERENCE	evm.model.Ug_unitig_8.1882	Eukaryotic initiation factor 4a-14	EC:3.6.1.3;EC:3.6.1.15	A	AT3G13920.1	eukaryotic_translation_initiation_factor_4A1
REFERENCE	evm.model.Ug_unitig_8.1876	DEAD-box ATP-dependent RNA helicase 56	EC:3.6.1.3;EC:3.6.1.15	A	AT5G11200.1	DEAD/DEAH_box_RNA_helicase_family_protein
REFERENCE	evm.model.Ug_unitig_8.1868	Calcium-transporting ATPase	EC:3.6.1.3;EC:7.2.2.10;EC:3.6.1.15	P	AT1G27770.4	autoinhibited_Ca2+-ATPase_1
REFERENCE	evm.model.Ug_unitig_8.1808	ABC transporter G family member 22	EC:3.6.1.3;EC:3.6.1.15	Q	AT5G06530.2	ABC-2_type_transporter_family_protein
REFERENCE	evm.model.Ug_unitig_8.1577	glutathione gamma-glutamylcysteinyltransferase 1-like isoform X1	EC:3.6.3.16;EC:3.6.1.3;EC:2.3.2.15;EC:3.6.1.15	P	AT5G44070.1	phytochelatin_synthase_1_(PCS1)
REFERENCE	evm.model.Ug_unitig_8.1108	26S proteasome regulatory complex, ATPase RPT4	EC:3.6.1.3;EC:3.6.1.15	O	AT1G45000.1	AAA-type_ATPase_family_protein
REFERENCE	evm.model.Ug_unitig_8.1101	Kinesin-like protein	EC:3.6.1.3;EC:3.6.1.15;EC:3.6.4.4	Z	AT2G36200.1	P-loop_containing_nucleoside_triphosphate_hydrolases_superfamily_protein
REFERENCE	evm.model.Ug_unitig_8.886	ATP-dependent helicase BRM	EC:3.6.1.3;EC:3.6.1.15	A	AT2G46020.4	transcription_regulatory_protein_SNF2
REFERENCE	evm.model.Ug_unitig_8.871	DNA topoisomerase 2	EC:3.6.1.3;EC:5.99.1.3;EC:3.6.1.15	B	AT3G23890.2	topoisomerase_II
REFERENCE	evm.model.Ug_unitig_8.860	ABC transporter G family member 11	EC:3.6.1.3;EC:7.3.2.2;EC:3.6.1.15	Q	AT1G17840.1	white-brown_complex-like_protein
REFERENCE	evm.model.Ug_unitig_8.418	cell division cycle protein 48 homolog	EC:3.6.1.3;EC:3.6.1.15;EC:3.6.4.3	O	AT5G03340.1	ATPase%2C_AAA-type%2C_CDC48_protein
REFERENCE	evm.model.Ug_unitig_8.417	Cell division cycle protein 48	EC:3.6.1.3;EC:3.6.1.15	O	AT5G03340.1	ATPase%2C_AAA-type%2C_CDC48_protein
REFERENCE	evm.model.Ug_unitig_8.366	Putative centromere-associated protein E-like	EC:3.6.1.3;EC:3.6.1.15	Z	AT4G39050.1	Kinesin_motor_family_protein
REFERENCE	evm.model.Ug_unitig_8.360	Kinesin-like protein	EC:3.6.1.3;EC:3.6.1.15	Z	AT3G43210.5	ATP_binding_microtubule_motor_family_protein
REFERENCE	evm.model.Ug_unitig_8.334	Phospholipid-transporting ATPase	EC:3.6.1.3;EC:7.6.2.1;EC:3.6.1.15	P	AT1G68710.2	ATPase_E1-E2_type_family_protein_/_haloacid_dehalogenase-like_hydrolase_family_protein
REFERENCE	evm.model.Ug_unitig_8.298	pre-mRNA-splicing factor ATP-dependent RNA helicase DEAH10	EC:3.6.1.3;EC:3.6.4.13;EC:3.6.1.15	A	AT1G26370.1	RNA_helicase_family_protein
REFERENCE	evm.model.Ug_unitig_8.84	Dead-box atp-dependent rna helicase 3, chloroplastic	EC:3.6.1.3;EC:3.6.4.13;EC:3.6.1.15	A	AT5G26742.1	DEAD_box_RNA_helicase_(RH3)
REFERENCE	evm.model.Ug_unitig_8.81	pre-mRNA-splicing factor ATP-dependent RNA helicase DEAH1-like isoform X1	EC:3.6.1.3;EC:3.6.1.15	A	AT1G32490.1	RNA_helicase_family_protein
REFERENCE	evm.model.Ug_unitig_8.75	Stromal 70 kDa heat shock-related protein, chloroplastic	EC:3.6.1.3;EC:3.6.1.15	O	AT4G24280.1	chloroplast_heat_shock_protein_70-1
REFERENCE	evm.model.Ug_unitig_5.2	Abc transporter c family member 9	EC:3.6.1.3;EC:7.6.2.2;EC:3.6.1.15	Q	AT3G60160.1	multidrug_resistance-associated_protein_9
REFERENCE	evm.model.Ug_unitig_0.2290	Kinesin-like protein	EC:3.6.1.3;EC:3.6.1.15	Z	AT3G16630.2	P-loop_containing_nucleoside_triphosphate_hydrolases_superfamily_protein
REFERENCE	evm.model.Ug_unitig_0.2092	Kinesin-like protein	EC:3.6.1.3;EC:3.6.1.15	Z	AT5G54670.2	kinesin_3
REFERENCE	evm.model.Ug_unitig_0.2083	Kinesin-like protein	EC:3.6.1.3;EC:3.6.1.15	Z	AT5G27550.2	P-loop_containing_nucleoside_triphosphate_hydrolases_superfamily_protein
REFERENCE	evm.model.Ug_unitig_0.1884	26S protease regulatory subunit 6B-like protein	EC:3.6.1.3;EC:3.6.1.15	O	AT5G58290.1	regulatory_particle_triple-A_ATPase_3
REFERENCE	evm.model.Ug_unitig_0.1718	DNA repair protein RAD50	EC:2.7.4.4;EC:2.7.4.3;EC:3.6.1.3;EC:3.6.1.15	L	AT2G31970.1	DNA_repair-recombination_protein_(RAD50)
REFERENCE	evm.model.Ug_unitig_0.1546	Kinesin-like protein kca2	EC:3.6.1.3;EC:3.6.4.5;EC:3.6.1.15	Z	AT5G10470.1	kinesin_like_protein_for_actin_based_chloroplast_movement_1
REFERENCE	evm.model.Ug_unitig_0.1379	ABC transporter F family member 1-like	EC:3.6.1.3;EC:3.6.1.15	S	AT5G60790.1	ABC_transporter_family_protein
REFERENCE	evm.model.Ug_unitig_0.1309	50S ribosomal protein L19, chloroplastic	EC:3.6.1.3;EC:3.6.1.15	J	AT4G11630.1	Ribosomal_protein_L19_family_protein
REFERENCE	evm.model.Ug_unitig_0.1181	DEAD-box ATP-dependent RNA helicase 8	EC:3.6.1.3;EC:3.6.4.13;EC:3.6.1.15	A	AT4G00660.2	RNAhelicase-like_8
REFERENCE	evm.model.Ug_unitig_0.1142	Abc transporter g family member 11	EC:3.6.1.3;EC:3.6.3.25;EC:7.3.2.2;EC:7.3.2.3;EC:3.6.1.15	Q	AT1G17840.1	white-brown_complex-like_protein
REFERENCE	evm.model.Ug_unitig_0.1056	V-type proton ATPase subunit H	EC:3.6.1.3;EC:7.1.2.1;EC:3.6.1.15	C	AT3G42050.1	vacuolar_ATP_synthase_subunit_H_family_protein
REFERENCE	evm.model.Ug_unitig_0.1040	Katanin p60 ATPase-containing subunit A1	EC:3.6.1.3;EC:3.6.1.15;EC:3.6.4.3	O	AT1G80350.1	P-loop_containing_nucleoside_triphosphate_hydrolases_superfamily_protein
REFERENCE	evm.model.Ug_unitig_0.927	Cation-transporting ATPase	EC:3.6.1.3;EC:7.2.2.10;EC:3.6.1.15	P	AT5G23630.1	phosphate_deficiency_response_2
REFERENCE	evm.model.Ug_unitig_0.815	heat shock 70 kDa protein, mitochondrial	EC:3.6.1.3;EC:3.6.1.15	O	AT5G09590.1	mitochondrial_HSO70_2
REFERENCE	evm.model.Ug_unitig_0.813	heat shock 70 kDa protein, mitochondrial	EC:1.3.1.74;EC:3.6.1.3;EC:3.6.1.15	O	AT5G09590.1	mitochondrial_HSO70_2
REFERENCE	evm.model.Ug_unitig_0.691	DExH-box ATP-dependent RNA helicase DExH6-like	EC:3.6.1.3;EC:3.6.1.15	A	AT2G30800.1	helicase_in_vascular_tissue_and_tapetum
REFERENCE	evm.model.Ug_unitig_0.558	probable DNA helicase MCM9	EC:3.6.1.3;EC:3.6.1.15	L	AT2G14050.2	minichromosome_maintenance_9
REFERENCE	evm.model.Ug_unitig_0.519	AAA+-type ATPase	EC:3.6.1.3;EC:3.6.1.15	O	AT5G57480.1	P-loop_containing_nucleoside_triphosphate_hydrolases_superfamily_protein
REFERENCE	evm.model.Ug_unitig_0.330	Plasma membrane ATPase	EC:3.6.1.3;EC:7.1.2.1;EC:3.6.1.15	P	AT2G07560.1	H[+]-ATPase_6
REFERENCE	evm.model.Ug_unitig_0.297	ATPase family AAA domain-containing protein 1-like	EC:3.6.1.3;EC:3.6.1.15;EC:3.6.4.3	O	AT4G27680.1	P-loop_containing_nucleoside_triphosphate_hydrolases_superfamily_protein
REFERENCE	evm.model.Ug_unitig_0.270	ABC transporter G family member 12	EC:3.6.1.3;EC:7.3.2.5;EC:7.3.2.2;EC:3.6.1.15	Q	AT1G51500.1	ABC-2_type_transporter_family_protein
REFERENCE	evm.model.Ug_unitig_0.240	ABC transporter I family member 6, chloroplastic-like	EC:3.6.1.3;EC:7.6.2.11;EC:7.4.2.5;EC:7.4.2.6;EC:3.6.1.15	Q	AT3G10670.1	non-intrinsic_ABC_protein_7
REFERENCE	evm.model.Ug_unitig_0.64	phragmoplast orienting kinesin 2	EC:3.6.1.3;EC:3.6.1.15	Z	AT3G19050.1	phragmoplast_orienting_kinesin_2

## Sheet: Urenif PROXIMAL
Tags	Annotation	FDR	P-Value	Nr Test	Nr Reference	Non Annot Test	Non Annot Reference
[OVER]	EC:7.1.1.2	0.011086737713374503	4.0940685795326815E-5	9	39	974	26729
TEST	evm.model.scaffold451_size225693.30	gamma carbonic anhydrase 1, mitochondrial	EC:7.1.1.2;EC:1.6.99.5;EC:1.6.99.3	S	AT1G19580.1	gamma_carbonic_anhydrase_1
TEST	evm.model.scaffold451_size225693.28	gamma carbonic anhydrase 1, mitochondrial-like	EC:7.1.1.2;EC:1.6.99.5;EC:1.6.99.3	S	AT1G19580.2	gamma_carbonic_anhydrase_1
TEST	evm.model.scaffold336_size320595.78	NADH dehydrogenase subunit 2	EC:7.1.1.2;EC:1.6.99.5;EC:1.6.99.3	C	AT2G07689.1	NADH-Ubiquinone/plastoquinone_(complex_I)_protein
TEST	evm.model.scaffold336_size320595.76	NADH dehydrogenase subunit 2	EC:7.1.1.2;EC:1.6.99.5;EC:1.6.99.3	C	AT2G07689.1	NADH-Ubiquinone/plastoquinone_(complex_I)_protein
TEST	evm.model.scaffold336_size320595.74	NADH dehydrogenase subunit 2	EC:7.1.1.2;EC:1.6.99.5;EC:1.6.99.3	C	AT2G07689.1	NADH-Ubiquinone/plastoquinone_(complex_I)_protein
TEST	evm.model.scaffold333_size321185.20	NADH dehydrogenase [ubiquinone] iron-sulfur protein like	EC:7.1.1.2;EC:1.6.99.5;EC:1.6.99.3	S	AT2G47690.1	NADH-ubiquinone_oxidoreductase-like_protein
TEST	evm.model.scaffold333_size321185.18	NADH dehydrogenase [ubiquinone] iron-sulfur protein like	EC:7.1.1.2;EC:1.6.99.5;EC:1.6.99.3	S	AT2G47690.1	NADH-ubiquinone_oxidoreductase-like_protein
TEST	evm.model.scaffold143_size572353.118	Gamma carbonic anhydrase-like 2, mitochondrial	EC:7.1.1.2;EC:1.6.99.5;EC:1.6.99.3	S	AT5G63510.1	gamma_carbonic_anhydrase_like_1
TEST	evm.model.scaffold143_size572353.116	Gamma carbonic anhydrase-like 2, mitochondrial	EC:7.1.1.2;EC:1.6.99.5;EC:1.6.99.3	S	AT5G63510.1	gamma_carbonic_anhydrase_like_1
REFERENCE	evm.model.scaffold1053_size21173.3	NADH dehydrogenase [ubiquinone] 1 beta subcomplex subunit 10-B	EC:7.1.1.2;EC:1.6.99.5;EC:1.6.99.3	C	AT3G18410.2	NADH_dehydrogenase_ubiquinone_1_beta_subcomplex_subunit_10-B-like_protein_(Complex_I_subunit_NDUFS6)
REFERENCE	evm.model.scaffold1015_size24410.1	NADH-ubiquinone oxidoreductase chain 1	EC:7.1.1.2;EC:1.6.99.5;EC:1.6.99.3	C	ATMG01275.1	NADH_dehydrogenase_1A
REFERENCE	evm.model.scaffold649_size118696.3	54S ribosomal protein L51, mitochondrial	EC:7.1.1.2;EC:1.6.99.5;EC:1.6.99.3	J	AT3G59650.1	mitochondrial_ribosomal_protein_L51/S25/CI-B8_family_protein
REFERENCE	evm.model.scaffold641_size121784.18	probable NADH dehydrogenase [ubiquinone] 1 alpha subcomplex subunit 5, mitochondrial	EC:7.1.1.2;EC:1.6.99.5;EC:1.6.99.3	C	AT5G52840.1	NADH-ubiquinone_oxidoreductase-like_protein
REFERENCE	evm.model.scaffold542_size172077.24	NADH-ubiquinone oxidoreductase	EC:7.1.1.2;EC:1.6.99.5;EC:1.6.99.3	S	AT4G16450.2	NADH-ubiquinone_oxidoreductase
REFERENCE	evm.model.scaffold530_size179357.28	NADH:ubiquinone reductase (H(+)-translocating)	EC:7.1.1.2;EC:1.6.99.5;EC:1.6.99.3	none	AT4G20150.1	excitatory_amino_acid_transporter
REFERENCE	evm.model.scaffold515_size186375.31	NADH dehydrogenase [ubiquinone] 1 alpha subcomplex subunit 6-like	EC:5.2.1.8;EC:7.1.1.2;EC:1.6.99.5;EC:1.6.99.3	C	AT3G12260.1	LYR_family_of_Fe/S_cluster_biogenesis_protein
REFERENCE	evm.model.scaffold488_size202194.4	Excitatory amino acid transporter	EC:7.1.1.2;EC:1.6.99.5;EC:1.6.99.3	none	AT4G20150.1	excitatory_amino_acid_transporter
REFERENCE	evm.model.scaffold448_size226196.15	NADH dehydrogenase [ubiquinone] 1 beta subcomplex subunit 7	EC:7.1.1.2;EC:1.6.99.5;EC:1.6.99.3	C	AT2G02050.1	NADH-ubiquinone_oxidoreductase_B18_subunit
REFERENCE	evm.model.scaffold447_size226588.41	NADH:ubiquinone reductase (H(+)-translocating)	EC:7.1.1.2;EC:1.6.99.5;EC:1.6.99.3	none	AT3G57785.1	ESSS_subunit_of_NADH:ubiquinone_oxidoreductase_(complex_I)_protein
REFERENCE	evm.model.scaffold418_size248570.25	54S ribosomal protein L51, mitochondrial-like	EC:7.1.1.2;EC:1.6.99.5;EC:1.6.99.3	J	AT3G59650.1	mitochondrial_ribosomal_protein_L51/S25/CI-B8_family_protein
REFERENCE	evm.model.scaffold403_size258745.73	NADH dehydrogenase [ubiquinone] flavoprotein 2, mitochondrial-like	EC:7.1.1.2;EC:1.6.99.5;EC:1.6.99.3	C	AT4G02580.1	NADH-ubiquinone_oxidoreductase_24_kDa_subunit
REFERENCE	evm.model.scaffold392_size272084.43	NADH-ubiquinone oxidoreductase	EC:7.1.1.2;EC:1.6.99.5;EC:1.6.99.3	S	AT4G16450.2	NADH-ubiquinone_oxidoreductase
REFERENCE	evm.model.scaffold254_size388685.97	K-homology type RNA binding protein	EC:7.1.1.2;EC:1.6.99.5;EC:1.6.99.3	A	AT2G25970.1	KH_domain-containing_protein
REFERENCE	evm.model.scaffold240_size406237.33	NADH dehydrogenase subunit B (Fragment)	EC:7.1.1.2;EC:1.6.99.5;EC:1.6.99.3	C	ATCG01250.1	NADH-quinone_oxidoreductase_protein
REFERENCE	evm.model.scaffold226_size429880.27	External alternative nad(P)h-ubiquinone oxidoreductase b2, mitochondrial	EC:7.1.1.2;EC:1.6.99.5;EC:1.6.99.3	C	AT4G05020.1	NAD(P)H_dehydrogenase_B2
REFERENCE	evm.model.scaffold198_size466070.101	Gamma carbonic anhydrase-like 2, mitochondrial	EC:7.1.1.2;EC:1.6.99.5;EC:1.6.99.3	S	AT5G63510.1	gamma_carbonic_anhydrase_like_1
REFERENCE	evm.model.scaffold182_size489013.80	NADH dehydrogenase [ubiquinone] 1 alpha subcomplex subunit 9, mitochondrial	EC:7.1.1.2;EC:1.6.99.5;EC:1.6.99.3	C	AT2G20360.1	NAD(P)-binding_Rossmann-fold_superfamily_protein
REFERENCE	evm.model.scaffold182_size489013.57	NADH dehydrogenase [ubiquinone] flavoprotein 2, mitochondrial	EC:7.1.1.2;EC:1.6.99.5;EC:1.6.99.3	C	AT4G02580.1	NADH-ubiquinone_oxidoreductase_24_kDa_subunit
REFERENCE	evm.model.scaffold182_size489013.56	NADH dehydrogenase [ubiquinone] flavoprotein 2, mitochondrial	EC:7.1.1.2;EC:1.6.99.5;EC:1.6.99.3	C	AT4G02580.1	NADH-ubiquinone_oxidoreductase_24_kDa_subunit
REFERENCE	evm.model.scaffold174_size508446.86	54S ribosomal protein L51, mitochondrial	EC:7.1.1.2;EC:1.6.99.5;EC:1.6.99.3	J	AT3G59650.2	mitochondrial_ribosomal_protein_L51/S25/CI-B8_family_protein
REFERENCE	evm.model.scaffold168_size520293.44	Nadh dehydrogenase [ubiquinone] iron-sulfur protein 7, mitochondrial	EC:7.1.1.2;EC:1.6.99.5;EC:1.6.99.3	C	AT5G11770.1	NADH-ubiquinone_oxidoreductase_20_kDa_subunit
REFERENCE	evm.model.scaffold167_size520804.11	NADH dehydrogenase [ubiquinone] flavoprotein 2, mitochondrial-like	EC:7.1.1.2;EC:1.6.99.5;EC:1.6.99.3	C	AT4G02580.1	NADH-ubiquinone_oxidoreductase_24_kDa_subunit
REFERENCE	evm.model.scaffold147_size561064.35	NADH dehydrogenase [ubiquinone] 1 alpha subcomplex subunit 12	EC:7.1.1.2;EC:1.6.99.5;EC:1.6.99.3	C	AT3G03100.1	NADH:ubiquinone_oxidoreductase%2C_17.2kDa_subunit
REFERENCE	evm.model.scaffold121_size616638.116	NADH dehydrogenase [ubiquinone] 1 beta subcomplex subunit 7	EC:7.1.1.2;EC:1.6.99.5;EC:1.6.99.3	C	AT2G02050.1	NADH-ubiquinone_oxidoreductase_B18_subunit
REFERENCE	evm.model.scaffold106_size656854.56	NADH dehydrogenase [ubiquinone] 1 alpha subcomplex subunit 8-B like	EC:7.1.1.2;EC:1.6.99.5;EC:1.6.99.3	C	AT5G18800.2	Cox19-like_CHCH_family_protein
REFERENCE	evm.model.scaffold102_size677817.29	NADH dehydrogenase [ubiquinone] 1 alpha subcomplex subunit 13-B	EC:7.1.1.2;EC:1.6.99.5;EC:1.6.99.3	CD	AT1G04630.1	GRIM-19_protein
REFERENCE	evm.model.scaffold87_size752611.108	NADH dehydrogenase [ubiquinone] 1 beta subcomplex subunit 10-B	EC:7.1.1.2;EC:1.6.99.5;EC:1.6.99.3	C	AT3G18410.2	NADH_dehydrogenase_ubiquinone_1_beta_subcomplex_subunit_10-B-like_protein_(Complex_I_subunit_NDUFS6)
REFERENCE	evm.model.scaffold70_size835982.171	NADH dehydrogenase subunit 4	EC:7.1.1.2;EC:1.6.99.5;EC:1.6.99.3	C	noTAIR	NULL
REFERENCE	evm.model.scaffold70_size835982.78	NADH dehydrogenase [ubiquinone] 1 alpha subcomplex subunit 12	EC:7.1.1.2;EC:1.6.99.5;EC:1.6.99.3	U	AT4G26965.1	NADH:ubiquinone_oxidoreductase%2C_17.2kDa_subunit
REFERENCE	evm.model.scaffold65_size853472.128	gamma carbonic anhydrase 1, mitochondrial	EC:7.1.1.2;EC:1.6.99.5;EC:1.6.99.3	S	AT1G47260.1	gamma_carbonic_anhydrase_2
REFERENCE	evm.model.scaffold65_size853472.36	NADH dehydrogenase [ubiquinone] flavoprotein 1, mitochondrial	EC:7.1.1.2;EC:1.6.99.5;EC:1.6.99.3	C	AT5G08530.1	51_kDa_subunit_of_complex_I
REFERENCE	evm.model.scaffold58_size900371.86	NADH dehydrogenase [ubiquinone] iron-sulfur protein 4, mitochondrial	EC:7.1.1.2;EC:1.6.99.5;EC:1.6.99.3	C	AT5G67590.1	NADH-ubiquinone_oxidoreductase-like_protein
REFERENCE	evm.model.scaffold42_size1040323.71	NADH dehydrogenase [ubiquinone] flavoprotein 1, mitochondrial	EC:7.1.1.2;EC:1.6.99.5;EC:1.6.99.3	C	AT5G08530.1	51_kDa_subunit_of_complex_I
REFERENCE	evm.model.scaffold37_size1057303.59	ATP synthase subunit beta, chloroplastic	EC:7.1.1.2;EC:1.6.99.5;EC:1.6.99.3	C	ATCG00480.1	ATP_synthase_subunit_beta
REFERENCE	evm.model.scaffold33_size1110170.28	Nadh dehydrogenase [ubiquinone] 1 alpha subcomplex subunit 1	EC:7.1.1.2;EC:1.6.99.5;EC:1.6.99.3	S	AT3G08610.1	NADH_dehydrogenase_ubiquinone_1_alpha_subcomplex_subunit
REFERENCE	evm.model.scaffold31_size1122664.156	NADH dehydrogenase [ubiquinone] iron-sulfur protein 1, mitochondrial	EC:7.1.1.2;EC:1.6.99.5;EC:1.6.99.3	C	AT5G37510.2	NADH-ubiquinone_dehydrogenase
REFERENCE	evm.model.scaffold19_size1367837.54	NADH dehydrogenase [ubiquinone] 1 alpha subcomplex subunit 2-like	EC:7.1.1.2;EC:1.6.99.5;EC:1.6.99.3	C	AT5G47890.1	NADH-ubiquinone_oxidoreductase_B8_subunit
REFERENCE	evm.model.scaffold18_size1404391.84	Outer envelope pore protein 16-3, chloroplastic/mitochondrial	EC:7.1.1.2;EC:1.6.99.5;EC:1.6.99.3	U	AT2G42210.2	Mitochondrial_import_inner_membrane_translocase_subunit_Tim17/Tim22/Tim23_family_protein
[OVER]	EC:5.4.2.2	0.003829146956506838	2.828025817213322E-6	5	3	978	26765
TEST	evm.model.scaffold299_size348511.13	Phosphoglucomutase, cytoplasmic	EC:5.4.2.2	G	AT1G70730.1	Phosphoglucomutase/phosphomannomutase_family_protein
TEST	evm.model.scaffold299_size348511.11	Phosphoglucomutase, cytoplasmic 2	EC:5.4.2.2	G	AT1G70730.1	Phosphoglucomutase/phosphomannomutase_family_protein
TEST	evm.model.scaffold299_size348511.4	Phosphoglucomutase, cytoplasmic	EC:5.4.2.2	G	AT1G23190.1	Phosphoglucomutase/phosphomannomutase_family_protein
TEST	evm.model.scaffold42_size1040323.123	Phosphoglucomutase, cytoplasmic	EC:5.4.2.2	G	AT1G23190.1	Phosphoglucomutase/phosphomannomutase_family_protein
TEST	evm.model.scaffold42_size1040323.121	Phosphoglucomutase, cytoplasmic	EC:5.4.2.2	G	AT1G70730.1	Phosphoglucomutase/phosphomannomutase_family_protein
REFERENCE	evm.model.scaffold486_size202863.1	Alpha-D-phosphohexomutase superfamily	EC:5.4.2.2	G	AT1G23190.1	Phosphoglucomutase/phosphomannomutase_family_protein
REFERENCE	evm.model.scaffold260_size384151.29	Phosphoglucomutase, cytoplasmic 2	EC:5.4.2.2	G	AT1G70730.2	Phosphoglucomutase/phosphomannomutase_family_protein
REFERENCE	evm.model.scaffold167_size520804.30	phosphoglucomutase, chloroplastic	EC:5.4.2.2	G	AT5G51820.1	phosphoglucomutase
[OVER]	EC:2.7.11	0.006913918765358552	1.021258310983538E-5	74	1171	909	25597
TEST	evm.model.scaffold819_size56302.3	pollen receptor-like kinase 2	EC:2.7.11	T	AT5G35390.1	Leucine-rich_repeat_protein_kinase_family_protein
TEST	evm.model.scaffold760_size73572.5	Serine/threonine-protein kinase AGC1-7	EC:2.7.11	T	AT1G79250.4	AGC_kinase_1.7
TEST	evm.model.scaffold708_size93858.25	Cysteine-rich receptor-like protein kinase 10	EC:2.7.11	T	AT4G23140.1	cysteine-rich_RLK_(RECEPTOR-like_protein_kinase)_6
TEST	evm.model.scaffold683_size103566.6	26S proteasome regulatory complex, subunit PSMD10	EC:2.7.11;EC:4.6.1.2	S	AT4G10720.2	Ankyrin_repeat_family_protein
TEST	evm.model.scaffold620_size128314.37	Non-specific serine/threonine protein kinase	EC:2.7.11	S	noTAIR	NULL
TEST	evm.model.scaffold620_size128314.29	serine/threonine-protein kinase ATM	EC:2.7.11	BDLT	AT3G48190.1	Serine/Threonine-kinase_ATM-like_protein
TEST	evm.model.scaffold608_size133036.15	serine/threonine-protein kinase ATM	EC:2.7.11	BDLT	noTAIR	NULL
TEST	evm.model.scaffold608_size133036.13	Non-specific serine/threonine protein kinase	EC:2.7.11	BDLT	AT3G48190.2	Serine/Threonine-kinase_ATM-like_protein
TEST	evm.model.scaffold608_size133036.9	Serine/threonine-protein kinase ATM	EC:2.7.11	BDLT	noTAIR	NULL
TEST	evm.model.scaffold559_size158248.40	Cysteine-rich receptor-like protein kinase 10	EC:2.7.11	T	AT4G23140.1	cysteine-rich_RLK_(RECEPTOR-like_protein_kinase)_6
TEST	evm.model.scaffold551_size162907.45	Cysteine-rich receptor-like protein kinase 10	EC:2.7.11	T	AT4G23230.1	cysteine-rich_RECEPTOR-like_kinase
TEST	evm.model.scaffold551_size162907.43	cysteine-rich receptor-like protein kinase 29	EC:2.7.11	T	AT4G23230.1	cysteine-rich_RECEPTOR-like_kinase
TEST	evm.model.scaffold546_size167141.5	Putative receptor-like protein kinase	EC:2.7.11	T	AT3G08760.3	Protein_kinase_superfamily_protein
TEST	evm.model.scaffold535_size176836.33	Serine-threonine protein kinase 19	EC:2.7.11	S	AT2G20495.1	Serine/Threonine-kinase
TEST	evm.model.scaffold524_size182843.21	Non-specific serine/threonine protein kinase	EC:2.7.10;EC:2.7.11	T	AT3G01090.2	SNF1_kinase_homolog_10
TEST	evm.model.scaffold524_size182843.19	Non-specific serine/threonine protein kinase	EC:2.7.10;EC:2.7.11	T	AT3G01090.3	SNF1_kinase_homolog_10
TEST	evm.model.scaffold521_size184735.23	probable LRR receptor-like serine/threonine-protein kinase At3g47570	EC:2.7.11	S	noTAIR	NULL
TEST	evm.model.scaffold481_size205178.2	Mitogen-activated protein kinase	EC:2.7.11;EC:2.7.11.24	T	AT5G19010.1	mitogen-activated_protein_kinase_16
TEST	evm.model.scaffold451_size225693.44	Serine/threonine-protein kinase/endoribonuclease IRE1	EC:2.7.11	T	AT2G17520.1	Endoribonuclease/protein_kinase_IRE1-like_protein
TEST	evm.model.scaffold451_size225693.42	Endoribonuclease/kinase IRE1-like protein	EC:2.7.11	T	AT5G24360.3	inositol_requiring_1-1
TEST	evm.model.scaffold451_size225693.39	serine/threonine-protein kinase/endoribonuclease IRE1a	EC:2.7.11	T	AT2G17520.1	Endoribonuclease/protein_kinase_IRE1-like_protein
TEST	evm.model.scaffold432_size238105.58	Serine/threonine protein kinase	EC:2.7.11	T	AT4G22730.2	Leucine-rich_repeat_protein_kinase_family_protein
TEST	evm.model.scaffold432_size238105.49	Putative LRR receptor-like serine/threonine-protein kinase	EC:2.7.11	T	AT4G22730.1	Leucine-rich_repeat_protein_kinase_family_protein
TEST	evm.model.scaffold426_size243431.55	Non-specific serine/threonine protein kinase	EC:2.7.11	T	AT3G08720.4	serine/threonine_protein_kinase_2
TEST	evm.model.scaffold411_size250506.16	casein kinase II subunit alpha-2	EC:2.7.11	T	AT3G50000.1	casein_kinase_II%2C_alpha_chain_2
TEST	evm.model.scaffold411_size250506.12	casein kinase II subunit alpha-like	EC:2.7.11;EC:2.7.11.23	T	AT2G23070.1	Protein_kinase_superfamily_protein
TEST	evm.model.scaffold407_size254605.15	Cysteine-rich receptor-like protein kinase 10	EC:2.7.11	T	AT4G23180.1	cysteine-rich_RLK_(RECEPTOR-like_protein_kinase)_10
TEST	evm.model.scaffold393_size271938.3	Putative serine/threonine-protein kinase	EC:2.7.11;EC:2.7.11.22	T	AT1G54610.3	Protein_kinase_superfamily_protein
TEST	evm.model.scaffold317_size334483.12	Mitogen-activated protein kinase kinase 6	EC:2.7.11;EC:2.7.12.1	T	AT5G56580.1	MAP_kinase_kinase_6
TEST	evm.model.scaffold317_size334483.6	Mitogen-activated protein kinase kinase 6	EC:2.7.11;EC:2.7.12.1	T	AT5G56580.1	MAP_kinase_kinase_6
TEST	evm.model.scaffold315_size338688.68	Serine/threonine-protein kinase PBS1	EC:2.7.11	T	AT5G18610.3	Protein_kinase_superfamily_protein
TEST	evm.model.scaffold276_size366521.41	Serine/threonine protein kinase	EC:2.7.11	T	AT1G56140.1	Leucine-rich_repeat_transmembrane_protein_kinase
TEST	evm.model.scaffold276_size366521.39	Putative LRR receptor-like serine/threonine-protein kinase	EC:2.7.11	T	AT1G56130.3	Leucine-rich_repeat_transmembrane_protein_kinase
TEST	evm.model.scaffold276_size366521.38	Putative LRR receptor-like serine/threonine-protein kinase	EC:2.7.11	T	AT1G56120.1	Leucine-rich_repeat_transmembrane_protein_kinase
TEST	evm.model.scaffold233_size415906.8	Putative receptor-like protein kinase	EC:2.7.11	T	AT2G21480.1	Malectin/receptor-like_protein_kinase_family_protein
TEST	evm.model.scaffold190_size480112.89	pollen receptor-like kinase 2	EC:2.7.11	T	AT5G35390.1	Leucine-rich_repeat_protein_kinase_family_protein
TEST	evm.model.scaffold190_size480112.80	pollen receptor-like kinase 3	EC:2.7.11	T	AT3G42880.1	Leucine-rich_repeat_protein_kinase_family_protein
TEST	evm.model.scaffold179_size500287.106	probable LRR receptor-like serine/threonine-protein kinase At1g53430	EC:2.7.11	S	AT1G53440.1	Leucine-rich_repeat_transmembrane_protein_kinase
TEST	evm.model.scaffold150_size559803.148	CDT1-like protein a, chloroplastic	EC:2.7.11;EC:2.7.11.22	L	AT2G31270.1	CDT1-like_protein_A
TEST	evm.model.scaffold150_size559803.120	serine/threonine-protein kinase STY46-like	EC:2.7.11;EC:2.7.12.1	T	AT4G38470.2	ACT-like_protein_tyrosine_kinase_family_protein
TEST	evm.model.scaffold138_size578810.98	probable LRR receptor-like serine/threonine-protein kinase At4g20940	EC:2.7.11	T	AT4G20940.1	Leucine-rich_receptor-like_protein_kinase_family_protein
TEST	evm.model.scaffold138_size578810.96	probable LRR receptor-like serine/threonine-protein kinase At4g20940 isoform X2	EC:2.7.11	T	AT4G20940.1	Leucine-rich_receptor-like_protein_kinase_family_protein
TEST	evm.model.scaffold133_size591675.129	Serine/threonine-protein kinase Nek2	EC:2.7.11	T	AT3G63280.3	NIMA-related_kinase_4
TEST	evm.model.scaffold133_size591675.125	Serine/threonine-protein kinase Nek2	EC:2.7.11	T	AT3G04810.3	NIMA-related_kinase_2
TEST	evm.model.scaffold121_size616638.41	serine/threonine-protein kinase ATM	EC:2.7.11	BDLT	AT3G48190.3	Serine/Threonine-kinase_ATM-like_protein
TEST	evm.model.scaffold121_size616638.39	Non-specific serine/threonine protein kinase	EC:2.7.11	BDLT	AT3G48190.1	Serine/Threonine-kinase_ATM-like_protein
TEST	evm.model.scaffold121_size616638.33	Non-specific serine/threonine protein kinase	EC:2.7.11	BDLT	AT3G48190.3	Serine/Threonine-kinase_ATM-like_protein
TEST	evm.model.scaffold121_size616638.32	Serine/threonine-protein kinase ATM	EC:2.7.11	BDLT	AT3G48190.2	Serine/Threonine-kinase_ATM-like_protein
TEST	evm.model.scaffold121_size616638.31	Serine/threonine-protein kinase ATM	EC:2.7.11	BDLT	AT3G48190.3	Serine/Threonine-kinase_ATM-like_protein
TEST	evm.model.scaffold107_size656107.104	Putative receptor-like protein kinase	EC:2.7.11	T	AT3G59350.2	Protein_kinase_superfamily_protein
TEST	evm.model.scaffold106_size656854.38	26S proteasome regulatory complex, subunit PSMD10	EC:2.7.11;EC:4.6.1.2	S	AT4G10720.2	Ankyrin_repeat_family_protein
TEST	evm.model.scaffold105_size659173.12	probable LRR receptor-like serine/threonine-protein kinase At1g07650 isoform X1	EC:2.7.11	T	AT1G07650.4	Leucine-rich_repeat_transmembrane_protein_kinase
TEST	evm.model.scaffold105_size659173.6	Putative LRR receptor-like serine/threonine-protein kinase	EC:2.7.11	T	AT1G07650.4	Leucine-rich_repeat_transmembrane_protein_kinase
TEST	evm.model.scaffold101_size679088.44	putative receptor-like protein kinase At4g00960	EC:2.7.10;EC:2.7.11	T	AT4G04490.1	cysteine-rich_RLK_(RECEPTOR-like_protein_kinase)_36
TEST	evm.model.scaffold101_size679088.33	putative receptor-like protein kinase At4g00960	EC:2.7.10;EC:2.7.11	T	AT4G04490.1	cysteine-rich_RLK_(RECEPTOR-like_protein_kinase)_36
TEST	evm.model.scaffold87_size752611.168	Putative LRR receptor-like serine/threonine-protein kinase	EC:2.7.11	T	AT1G56120.1	Leucine-rich_repeat_transmembrane_protein_kinase
TEST	evm.model.scaffold87_size752611.158	Putative LRR receptor-like serine/threonine-protein kinase	EC:2.7.11	T	AT1G56130.2	Leucine-rich_repeat_transmembrane_protein_kinase
TEST	evm.model.scaffold50_size963328.91	Protein strubbelig-receptor family 6	EC:2.7.10;EC:2.7.11;EC:2.7.10.2	T	AT1G53730.1	STRUBBELIG-receptor_family_6
TEST	evm.model.scaffold50_size963328.59	protein STRUBBELIG-RECEPTOR FAMILY 5-like	EC:2.7.10;EC:2.7.11	T	AT1G78980.1	STRUBBELIG-receptor_family_5
TEST	evm.model.scaffold47_size1002735.193	serine/threonine-protein kinase ATM	EC:2.7.11	BDLT	AT3G48190.3	Serine/Threonine-kinase_ATM-like_protein
TEST	evm.model.scaffold47_size1002735.190	serine/threonine-protein kinase ATM isoform X1	EC:2.7.11	BDLT	AT3G48190.2	Serine/Threonine-kinase_ATM-like_protein
TEST	evm.model.scaffold45_size1012159.75	Cysteine-rich receptor-like protein kinase 10	EC:2.7.11	T	AT4G23230.1	cysteine-rich_RECEPTOR-like_kinase
TEST	evm.model.scaffold42_size1040323.61	cysteine-rich receptor-like protein kinase 10 isoform X3	EC:2.7.10;EC:2.7.11	T	AT4G04490.1	cysteine-rich_RLK_(RECEPTOR-like_protein_kinase)_36
TEST	evm.model.scaffold42_size1040323.56	Cysteine-rich receptor-like protein kinase 10	EC:2.7.11	T	AT4G23160.1	cysteine-rich_RECEPTOR-like_kinase
TEST	evm.model.scaffold40_size1048927.190	Mitogen-activated protein kinase	EC:2.7.11;EC:2.7.11.24	T	AT3G14720.1	MAP_kinase_19
TEST	evm.model.scaffold40_size1048927.180	Mitogen-activated protein kinase	EC:2.7.11;EC:2.7.11.24	T	AT2G42880.1	MAP_kinase_20
TEST	evm.model.scaffold21_size1333958.281	probable LRR receptor-like serine/threonine-protein kinase At1g07650 isoform X1	EC:2.7.11	T	AT1G07650.2	Leucine-rich_repeat_transmembrane_protein_kinase
TEST	evm.model.scaffold21_size1333958.276	Putative LRR receptor-like serine/threonine-protein kinase	EC:2.7.11	T	AT1G07650.3	Leucine-rich_repeat_transmembrane_protein_kinase
TEST	evm.model.scaffold21_size1333958.267	probable LRR receptor-like serine/threonine-protein kinase At1g07650 isoform X1	EC:2.7.11	T	AT1G07650.4	Leucine-rich_repeat_transmembrane_protein_kinase
TEST	evm.model.scaffold12_size1484567.83	Putative LRR receptor-like serine/threonine-protein kinase	EC:2.7.11	T	AT1G56130.2	Leucine-rich_repeat_transmembrane_protein_kinase
TEST	evm.model.scaffold12_size1484567.82	Putative LRR receptor-like serine/threonine-protein kinase	EC:2.7.11	T	AT1G56130.1	Leucine-rich_repeat_transmembrane_protein_kinase
TEST	evm.model.scaffold10_size1516488.5	Somatic embryogenesis receptor kinase 1	EC:2.7.11	T	AT4G33430.1	BRI1-associated_receptor_kinase
TEST	evm.model.scaffold4_size1665106.51	Mitogen-activated protein kinase	EC:2.7.11;EC:2.7.11.24	T	AT2G18170.1	MAP_kinase_7
TEST	evm.model.scaffold4_size1665106.46	Mitogen-activated protein kinase	EC:2.7.11;EC:2.7.11.24	T	AT2G18170.1	MAP_kinase_7
REFERENCE	evm.model.scaffold1828_size1030.1	MAPK related serine/threonine protein kinase	EC:2.7.11	T	AT4G19110.3	Protein_kinase_superfamily_protein
REFERENCE	evm.model.scaffold1598_size4395.1	probable serine/threonine-protein kinase At5g41260	EC:2.7.11	T	AT1G63500.1	kinase_with_tetratricopeptide_repeat_domain-containing_protein
REFERENCE	evm.model.scaffold1563_size5169.1	Serine/threonine-protein kinase SRK2B	EC:2.7.11	T	AT1G10940.1	Protein_kinase_superfamily_protein
REFERENCE	evm.model.scaffold1542_size5399.1	Mitogen-activated protein kinase	EC:2.7.11;EC:2.7.11.24	T	AT1G73670.1	MAP_kinase_15
REFERENCE	evm.model.scaffold1534_size5505.2	Serine/threonine-protein kinase HT1	EC:2.7.11.25;EC:2.7.10;EC:2.7.11;EC:2.7.12.1	T	AT3G01490.1	Protein_kinase_superfamily_protein
REFERENCE	evm.model.scaffold1517_size5709.1	Cell division control protein 2 homolog A	EC:2.7.11;EC:2.7.11.23;EC:2.7.11.22	L	AT3G48750.1	cell_division_control_2
REFERENCE	evm.model.scaffold1473_size6182.2	serine/threonine-protein kinase D6PKL1-like	EC:2.7.11	T	AT3G52890.4	KCBP-interacting_protein_kinase
REFERENCE	evm.model.scaffold1466_size6245.1	Putative LRR receptor-like serine/threonine-protein kinase	EC:2.7.11	T	AT1G67720.1	Leucine-rich_repeat_protein_kinase_family_protein
REFERENCE	evm.model.scaffold1404_size7197.1	Protein kinase apk1a, chloroplastic	EC:2.7.11	T	AT1G07570.5	Protein_kinase_superfamily_protein
REFERENCE	evm.model.scaffold1402_size7215.1	inactive leucine-rich repeat receptor-like serine/threonine-protein kinase At1g60630	EC:2.7.11	T	AT1G10850.1	Leucine-rich_repeat_protein_kinase_family_protein
REFERENCE	evm.model.scaffold1356_size8155.1	Mitogen-activated protein kinase kinase kinase YODA-like	EC:2.7.11.25;EC:2.7.11	T	noTAIR	NULL
REFERENCE	evm.model.scaffold1349_size8246.3	Non-specific serine/threonine protein kinase	EC:2.7.11	T	AT1G03920.3	Protein_kinase_family_protein
REFERENCE	evm.model.scaffold1314_size9040.1	probable serine/threonine-protein kinase WNK5	EC:2.7.11	T	AT3G51630.2	with_no_lysine_(K)_kinase_5
REFERENCE	evm.model.scaffold1301_size9367.1	Serine/threonine-protein kinase 24	EC:2.7.11	T	AT3G15220.1	Protein_kinase_superfamily_protein
REFERENCE	evm.model.scaffold1299_size9417.2	probable LRR receptor-like serine/threonine-protein kinase MRH1	EC:2.7.11	T	AT5G45840.2	Leucine-rich_repeat_protein_kinase_family_protein
REFERENCE	evm.model.scaffold1299_size9417.1	Shaggy-related protein kinase eta	EC:2.7.11;EC:2.7.11.26	T	AT4G18710.1	Protein_kinase_superfamily_protein
REFERENCE	evm.model.scaffold1295_size9508.2	receptor-like kinase TMK4	EC:2.7.11	T	AT3G23750.1	Leucine-rich_repeat_protein_kinase_family_protein
REFERENCE	evm.model.scaffold1278_size9822.1	Putative leucine-rich repeat receptor-like protein kinase	EC:2.7.11	G	AT5G49760.1	Leucine-rich_repeat_protein_kinase_family_protein
REFERENCE	evm.model.scaffold1269_size10061.1	serine/threonine-protein kinase-like protein ACR4	EC:2.7.11	T	AT3G59420.1	crinkly4
REFERENCE	evm.model.scaffold1265_size10345.1	Mitogen-activated protein kinase kinase 3	EC:2.7.11;EC:2.7.12.1;EC:2.7.11.24	T	AT5G40440.4	mitogen-activated_protein_kinase_kinase_3
REFERENCE	evm.model.scaffold1221_size11558.2	Mitogen-activated protein kinase kinase kinase yoda	EC:2.7.11	T	AT1G63700.2	Protein_kinase_superfamily_protein
REFERENCE	evm.model.scaffold1210_size12088.2	Protein NSP-INTERACTING KINASE 3	EC:2.7.11	T	AT1G60800.1	NSP-interacting_kinase_3
REFERENCE	evm.model.scaffold1205_size12494.3	inactive LRR receptor-like serine/threonine-protein kinase BIR2	EC:2.7.11	T	AT3G28450.1	Leucine-rich_repeat_protein_kinase_family_protein
REFERENCE	evm.model.scaffold1179_size13919.5	xylulose 5-phosphate/phosphate translocator, chloroplastic	EC:2.7.11;EC:2.7.11.22	EG	AT5G17630.1	Nucleotide/sugar_transporter_family_protein
REFERENCE	evm.model.scaffold1176_size14172.7	receptor-like cytosolic serine/threonine-protein kinase RBK2 isoform X2	EC:2.7.11	T	AT3G05140.1	ROP_binding_protein_kinases_2
REFERENCE	evm.model.scaffold1162_size14770.3	inactive LRR receptor-like serine/threonine-protein kinase BIR2	EC:2.7.11	T	AT3G28450.1	Leucine-rich_repeat_protein_kinase_family_protein
REFERENCE	evm.model.scaffold1147_size15341.3	Receptor-like protein kinase feronia	EC:2.7.10;EC:2.7.11;EC:2.7.10.2	T	AT3G51550.1	Malectin/receptor-like_protein_kinase_family_protein
REFERENCE	evm.model.scaffold1147_size15341.2	Receptor-like protein kinase feronia	EC:2.7.10;EC:2.7.11;EC:2.7.10.2	T	AT3G51550.1	Malectin/receptor-like_protein_kinase_family_protein
REFERENCE	evm.model.scaffold1143_size15444.4	WD repeat-containing protein 3	EC:2.7.11;EC:2.7.11.17;EC:2.7.11.7	A	AT3G21540.1	transducin_family_protein_/_WD-40_repeat_family_protein
REFERENCE	evm.model.scaffold1142_size15455.5	xylulose 5-phosphate/phosphate translocator, chloroplastic	EC:2.7.11;EC:2.7.11.22	EG	AT5G17630.1	Nucleotide/sugar_transporter_family_protein
REFERENCE	evm.model.scaffold1141_size15467.2	CDPK-related kinase 7-like	EC:2.7.11;EC:2.7.11.17	T	AT2G41140.1	CDPK-related_kinase_1
REFERENCE	evm.model.scaffold1130_size16129.1	Serine/threonine protein kinase	EC:2.7.11	T	AT3G04910.1	with_no_lysine_(K)_kinase_1
REFERENCE	evm.model.scaffold1127_size16359.5	serine/threonine-protein kinase dst1	EC:2.7.11	T	AT1G69220.1	Protein_kinase_superfamily_protein
REFERENCE	evm.model.scaffold1126_size16433.8	Mitogen-activated protein kinase	EC:2.7.11;EC:2.7.11.24	T	AT3G18040.4	MAP_kinase_9
REFERENCE	evm.model.scaffold1125_size16441.1	serine/threonine-protein kinase CDL1-like	EC:2.7.10;EC:2.7.11;EC:2.7.10.2	T	AT5G18610.3	Protein_kinase_superfamily_protein
REFERENCE	evm.model.scaffold1124_size16449.2	Mitotic checkpoint serine/threonine-protein kinase BUB1	EC:2.7.11	D	AT2G20635.1	protein_kinase_and_Mad3-BUB1-I_domain-containing_protein
REFERENCE	evm.model.scaffold1124_size16449.1	Putative LRR receptor-like serine/threonine-protein kinase	EC:2.7.11	T	AT5G56040.1	Leucine-rich_receptor-like_protein_kinase_family_protein
REFERENCE	evm.model.scaffold1110_size16795.2	calcium-dependent protein kinase 32-like	EC:2.7.11;EC:2.7.11.17	T	AT3G57530.1	calcium-dependent_protein_kinase_32
REFERENCE	evm.model.scaffold1091_size17896.3	inactive LRR receptor-like serine/threonine-protein kinase BIR2	EC:2.7.11	T	AT3G28450.1	Leucine-rich_repeat_protein_kinase_family_protein
REFERENCE	evm.model.scaffold1076_size19232.2	probable serine/threonine-protein kinase NAK	EC:2.7.11	T	AT1G07570.5	Protein_kinase_superfamily_protein
REFERENCE	evm.model.scaffold1067_size19649.2	Cysteine-rich receptor-like protein kinase 10	EC:2.7.11.25;EC:2.7.10;EC:2.7.11;EC:2.7.10.2	T	AT1G70740.1	Protein_kinase_superfamily_protein
REFERENCE	evm.model.scaffold1066_size20206.4	Receptor protein kinase TMK1	EC:2.7.11	T	AT1G66150.1	transmembrane_kinase_1
REFERENCE	evm.model.scaffold1064_size20511.5	Shaggy-related protein kinase alpha	EC:3.1.30;EC:2.7.11;EC:3.1.26;EC:3.1.26.4	T	AT3G05840.2	Protein_kinase_superfamily_protein
REFERENCE	evm.model.scaffold1049_size21338.3	serine/threonine-protein kinase CDL1-like	EC:2.7.11	T	AT3G58690.1	Protein_kinase_superfamily_protein
REFERENCE	evm.model.scaffold1048_size21377.2	Mitogen-activated protein kinase	EC:2.7.11;EC:2.7.11.24	T	AT2G42880.1	MAP_kinase_20
REFERENCE	evm.model.scaffold1043_size21697.3	Serine/threonine protein kinase	EC:2.7.11	T	AT2G01210.1	Leucine-rich_repeat_protein_kinase_family_protein
REFERENCE	evm.model.scaffold1040_size21852.8	Serine/threonine-protein kinase RIO1	EC:2.7.11	DT	AT5G37350.1	Serine/threonine-protein_kinase_Rio1
REFERENCE	evm.model.scaffold1040_size21852.7	Serine/threonine-protein kinase RIO1	EC:2.7.11	DT	AT2G24990.1	Serine/threonine-protein_kinase_Rio1
REFERENCE	evm.model.scaffold1029_size23488.1	Putative leucine-rich repeat receptor-like protein kinase	EC:2.7.11	S	AT1G25570.1	Di-glucose_binding_protein_with_Leucine-rich_repeat_domain-containing_protein
REFERENCE	evm.model.scaffold1022_size23813.9	Non-specific serine/threonine protein kinase	EC:2.7.11	T	AT4G33080.1	AGC_(cAMP-dependent%2C_cGMP-dependent_and_protein_kinase_C)_kinase_family_protein
REFERENCE	evm.model.scaffold992_size26005.3	transformation/transcription domain-associated protein-like	EC:2.7.11	BDLT	AT2G17930.1	Phosphatidylinositol_3-_and_4-kinase_family_protein_with_FAT_domain-containing_protein
REFERENCE	evm.model.scaffold991_size26200.1	Mitogen-activated protein kinase kinase kinase 7-like	EC:2.7.10;EC:2.7.10.1;EC:2.7.11	T	AT1G64300.2	Protein_kinase_family_protein
REFERENCE	evm.model.scaffold984_size26647.4	probable receptor-like protein kinase At5g24010	EC:2.7.11	T	AT5G24010.1	Protein_kinase_superfamily_protein
REFERENCE	evm.model.scaffold982_size26748.5	pollen receptor-like kinase 1	EC:2.7.11	P	AT5G35390.1	Leucine-rich_repeat_protein_kinase_family_protein
REFERENCE	evm.model.scaffold976_size27186.7	serine/threonine-protein kinase CDL1-like	EC:2.7.10;EC:2.7.11;EC:2.7.10.2	T	AT5G18610.3	Protein_kinase_superfamily_protein
REFERENCE	evm.model.scaffold964_size28131.9	Serine/threonine protein kinase	EC:2.7.11	T	AT5G39390.1	Leucine-rich_repeat_protein_kinase_family_protein
REFERENCE	evm.model.scaffold942_size30811.3	wall-associated receptor kinase-like 14	EC:2.7.11	T	AT2G23450.2	Protein_kinase_superfamily_protein
REFERENCE	evm.model.scaffold941_size30928.3	LRR receptor-like serine/threonine-protein kinase FEI 1	EC:2.7.11	T	AT1G31420.2	Leucine-rich_repeat_protein_kinase_family_protein
REFERENCE	evm.model.scaffold937_size31582.3	Putative receptor protein kinase TMK1	EC:2.7.11	T	AT1G66150.1	transmembrane_kinase_1
REFERENCE	evm.model.scaffold935_size31967.5	probably inactive leucine-rich repeat receptor-like protein kinase At5g48380	EC:2.7.11	T	AT5G48380.1	BAK1-interacting_receptor-like_kinase_1
REFERENCE	evm.model.scaffold916_size35026.3	putative kinase-like protein TMKL1	EC:2.7.11	T	AT5G07620.1	Protein_kinase_superfamily_protein
REFERENCE	evm.model.scaffold907_size36840.2	receptor-like cytosolic serine/threonine-protein kinase RBK2	EC:2.7.11	T	AT5G18910.1	Protein_kinase_superfamily_protein
REFERENCE	evm.model.scaffold900_size37806.2	serine/threonine-protein kinase CDL1-like	EC:2.7.11	T	AT1G20650.1	Protein_kinase_superfamily_protein
REFERENCE	evm.model.scaffold900_size37806.1	Serine/threonine-protein kinase	EC:2.7.11	T	AT1G20650.1	Protein_kinase_superfamily_protein
REFERENCE	evm.model.scaffold888_size40586.8	Mitogen-activated protein kinase kinase kinase 7-like	EC:2.7.10;EC:2.7.10.1;EC:2.7.11	T	AT1G64300.2	Protein_kinase_family_protein
REFERENCE	evm.model.scaffold884_size41633.2	CDPK-related kinase 5-like	EC:2.7.11;EC:2.7.11.17	T	AT3G50530.1	CDPK-related_kinase
REFERENCE	evm.model.scaffold883_size41640.11	probable serine/threonine-protein kinase At1g01540	EC:2.7.11	T	AT4G02630.1	Protein_kinase_superfamily_protein
REFERENCE	evm.model.scaffold880_size42587.1	Serine/threonine-protein kinase ATM	EC:2.7.11	BDLT	AT3G48190.3	Serine/Threonine-kinase_ATM-like_protein
REFERENCE	evm.model.scaffold879_size42848.5	L-type lectin-domain containing receptor kinase IV.1-like	EC:2.7.11	T	AT2G37710.1	receptor_lectin_kinase
REFERENCE	evm.model.scaffold879_size42848.4	L-type lectin-domain containing receptor kinase IV.1-like	EC:2.7.11	T	AT2G37710.1	receptor_lectin_kinase
REFERENCE	evm.model.scaffold865_size45177.13	L-type lectin-domain containing receptor kinase VIII.1-like	EC:2.7.11	T	AT3G53380.1	Concanavalin_A-like_lectin_protein_kinase_family_protein
REFERENCE	evm.model.scaffold862_size45560.11	protein kinase PINOID	EC:2.7.11	T	AT2G34650.1	Protein_kinase_superfamily_protein
REFERENCE	evm.model.scaffold855_size46386.7	probable serine/threonine-protein kinase At1g54610	EC:2.7.11;EC:2.7.11.22	T	AT1G71530.4	Protein_kinase_superfamily_protein
REFERENCE	evm.model.scaffold855_size46386.6	probable serine/threonine-protein kinase At1g54610	EC:2.7.11;EC:2.7.11.22	T	AT5G50860.1	Protein_kinase_superfamily_protein
REFERENCE	evm.model.scaffold853_size46902.9	serine/threonine-protein kinase PBS1	EC:2.7.11	T	AT5G13160.1	Protein_kinase_superfamily_protein
REFERENCE	evm.model.scaffold850_size47126.7	protein kinase APK1A, chloroplastic-like	EC:2.7.11	T	AT1G07570.4	Protein_kinase_superfamily_protein
REFERENCE	evm.model.scaffold848_size47649.2	Serine/threonine-protein kinase KIPK	EC:2.7.11	T	AT3G52890.4	KCBP-interacting_protein_kinase
REFERENCE	evm.model.scaffold847_size47669.8	serine/threonine-protein kinase HT1-like isoform X2	EC:2.7.11;EC:2.7.12.1	T	AT2G43850.1	Integrin-linked_protein_kinase_family
REFERENCE	evm.model.scaffold842_size49797.1	Mitogen-activated protein kinase kinase kinase YODA-like	EC:2.7.11.25;EC:2.7.11	T	AT1G53570.3	mitogen-activated_protein_kinase_kinase_kinase_3
REFERENCE	evm.model.scaffold835_size52192.7	proline-rich receptor-like protein kinase PERK9	EC:2.7.11	T	noTAIR	NULL
REFERENCE	evm.model.scaffold831_size52652.4	ATP-dependent RNA helicase-like protein DB10 isoform X1	EC:2.7.11;EC:3.6.1.3;EC:3.6.4.13;EC:3.6.1.15	A	AT5G14610.6	DEAD_box_RNA_helicase_family_protein
REFERENCE	evm.model.scaffold829_size53678.1	Serine/threonine protein kinase	EC:2.7.11;EC:1.3.1.74	T	AT2G01210.1	Leucine-rich_repeat_protein_kinase_family_protein
REFERENCE	evm.model.scaffold828_size53878.7	Serinethreonine-protein kinase/endoribonuclease ire1a	EC:2.7.11	T	AT5G24360.3	inositol_requiring_1-1
REFERENCE	evm.model.scaffold821_size55444.1	myosin heavy chain kinase B-like	EC:2.7.11;EC:2.7.11.17;EC:2.7.11.7	S	AT3G50390.1	Transducin/WD40_repeat-like_superfamily_protein
REFERENCE	evm.model.scaffold818_size56322.16	mitogen-activated protein kinase kinase kinase YODA-like	EC:2.7.11	T	AT4G36950.1	mitogen-activated_protein_kinase_kinase_kinase_21
REFERENCE	evm.model.scaffold810_size58437.6	Non-specific serine/threonine protein kinase	EC:2.7.11	T	AT3G17510.1	CBL-interacting_protein_kinase_1
REFERENCE	evm.model.scaffold805_size60286.8	probable LRR receptor-like serine/threonine-protein kinase At1g14390	EC:2.7.11	T	AT1G14390.1	Leucine-rich_repeat_protein_kinase_family_protein
REFERENCE	evm.model.scaffold786_size65005.3	cyclin-dependent kinase G-2-like isoform X1	EC:2.7.11;EC:2.7.11.22	T	AT1G67580.2	Protein_kinase_superfamily_protein
REFERENCE	evm.model.scaffold779_size67710.26	T-complex protein 1 subunit gamma	EC:2.7.11	O	AT5G26360.1	TCP-1/cpn60_chaperonin_family_protein
REFERENCE	evm.model.scaffold777_size68218.1	dual specificity tyrosine-phosphorylation-regulated kinase 1B-like	EC:2.7.10;EC:2.7.11	T	AT5G35980.3	YAK1-like_protein_1
REFERENCE	evm.model.scaffold776_size68812.2	Casein kinase II subunit beta	EC:2.7.11	DKT	AT5G47080.2	casein_kinase_II_beta_chain_1
REFERENCE	evm.model.scaffold773_size69822.14	Mitogen-activated protein kinase	EC:2.7.11;EC:2.7.11.24	T	AT2G01450.4	MAP_kinase_17
REFERENCE	evm.model.scaffold765_size72457.22	probable receptor-like protein kinase At5g24010	EC:2.7.11	T	AT5G24010.1	Protein_kinase_superfamily_protein
REFERENCE	evm.model.scaffold764_size73013.18	Putative serine/threonine-protein kinase WNK4	EC:2.7.11	T	AT3G18750.6	with_no_lysine_(K)_kinase_6
REFERENCE	evm.model.scaffold764_size73013.12	LRR receptor-like serine/threonine-protein kinase ERECTA	EC:2.7.11;EC:1.3.1.74	T	AT2G26330.1	Leucine-rich_receptor-like_protein_kinase_family_protein
REFERENCE	evm.model.scaffold764_size73013.11	LRR receptor-like serine/threonine-protein kinase ERECTA	EC:2.7.11;EC:1.3.1.74	T	AT2G26330.1	Leucine-rich_receptor-like_protein_kinase_family_protein
REFERENCE	evm.model.scaffold760_size73572.3	Serine/threonine-protein kinase AGC1-7	EC:2.7.11	T	AT1G79250.4	AGC_kinase_1.7
REFERENCE	evm.model.scaffold757_size75512.3	transformation/transcription domain-associated protein-like	EC:2.7.11	BDLT	AT2G17930.1	Phosphatidylinositol_3-_and_4-kinase_family_protein_with_FAT_domain-containing_protein
REFERENCE	evm.model.scaffold756_size75642.1	inactive leucine-rich repeat receptor-like protein kinase CORYNE	EC:2.7.11	T	AT5G13290.2	Protein_kinase_superfamily_protein
REFERENCE	evm.model.scaffold755_size76505.14	serine/threonine-protein kinase HT1-like	EC:2.7.11	T	AT4G18950.1	Integrin-linked_protein_kinase_family
REFERENCE	evm.model.scaffold755_size76505.1	cyclin-H1-1 isoform X1	EC:2.7.11;EC:2.7.11.23	D	AT5G27620.1	cyclin_H%3B1
REFERENCE	evm.model.scaffold753_size76750.16	pto-interacting protein 1-like	EC:2.7.11	T	AT1G48210.7	Protein_kinase_superfamily_protein
REFERENCE	evm.model.scaffold748_size78166.10	Serine/threonine-protein kinase 24	EC:2.7.11	T	AT3G15220.1	Protein_kinase_superfamily_protein
REFERENCE	evm.model.scaffold745_size79788.13	SRSF protein kinase 1-like	EC:2.7.11;EC:2.7.12.1	T	AT4G35500.1	Protein_kinase_superfamily_protein
REFERENCE	evm.model.scaffold744_size79833.8	receptor-like protein kinase HSL1	EC:2.7.11	T	AT5G25930.1	kinase_family_with_leucine-rich_repeat_domain-containing_protein
REFERENCE	evm.model.scaffold743_size79864.3	putative proline-rich receptor-like protein kinase PERK6	EC:2.7.11	T	AT1G49270.1	Protein_kinase_superfamily_protein
REFERENCE	evm.model.scaffold743_size79864.2	probable receptor-like serine/threonine-protein kinase At4g34500	EC:2.7.11	T	AT4G34500.1	Protein_kinase_superfamily_protein
REFERENCE	evm.model.scaffold737_size81492.4	Putative receptor-like protein kinase	EC:2.7.11	T	AT1G56720.4	Protein_kinase_superfamily_protein
REFERENCE	evm.model.scaffold734_size82491.12	Mitogen-activated protein kinase	EC:2.7.11;EC:2.7.11.24	H	AT1G73670.1	MAP_kinase_15
REFERENCE	evm.model.scaffold730_size86902.22	Putative inactive leucine-rich repeat receptor-like protein kinase	EC:2.7.11	T	AT3G03770.3	Leucine-rich_repeat_protein_kinase_family_protein
REFERENCE	evm.model.scaffold725_size88532.12	Serine/threonine protein kinase	EC:2.7.11	T	AT5G26110.3	Protein_kinase_superfamily_protein
REFERENCE	evm.model.scaffold724_size89489.20	serine/threonine-protein kinase CDL1-like	EC:2.7.11	T	AT3G20530.1	Protein_kinase_superfamily_protein
REFERENCE	evm.model.scaffold724_size89489.19	serine/threonine-protein kinase CDL1-like	EC:2.7.11	T	AT3G20530.1	Protein_kinase_superfamily_protein
REFERENCE	evm.model.scaffold719_size90700.13	U-box domain-containing protein 35-like	EC:2.7.11	T	AT5G61550.4	U-box_domain-containing_protein_kinase_family_protein
REFERENCE	evm.model.scaffold718_size90744.8	Leucine-rich repeat receptor-like protein kinase TDR	EC:2.7.11	T	AT5G61480.1	Leucine-rich_repeat_protein_kinase_family_protein
REFERENCE	evm.model.scaffold718_size90744.3	Tyrosine-protein kinase	EC:2.7.11	T	AT5G51560.1	Leucine-rich_repeat_protein_kinase_family_protein
REFERENCE	evm.model.scaffold710_size92978.7	mitogen-activated protein kinase kinase kinase NPK1-like	EC:2.7.11	T	AT3G50310.1	mitogen-activated_protein_kinase_kinase_kinase_20
REFERENCE	evm.model.scaffold708_size93858.31	cysteine-rich receptor-like protein kinase 25	EC:2.7.11	T	noTAIR	NULL
REFERENCE	evm.model.scaffold708_size93858.28	Cysteine-rich receptor-like protein kinase 29	EC:2.7.11	T	AT4G23140.1	cysteine-rich_RLK_(RECEPTOR-like_protein_kinase)_6
REFERENCE	evm.model.scaffold703_size94923.29	cyclin-dependent kinase G-2-like isoform X1	EC:2.7.11;EC:2.7.11.22	T	AT1G67580.2	Protein_kinase_superfamily_protein
REFERENCE	evm.model.scaffold701_size95458.16	Mitogen-activated protein kinase kinase kinase 7-like	EC:2.7.10;EC:2.7.10.1;EC:2.7.11	T	AT1G64300.2	Protein_kinase_family_protein
REFERENCE	evm.model.scaffold700_size95485.10	mitogen-activated protein kinase kinase kinase 2-like	EC:2.7.11.25;EC:2.7.11	T	AT5G55090.1	mitogen-activated_protein_kinase_kinase_kinase_15
REFERENCE	evm.model.scaffold699_size96700.21	inactive leucine-rich repeat receptor-like serine/threonine-protein kinase At1g60630	EC:2.7.11	T	AT1G10850.1	Leucine-rich_repeat_protein_kinase_family_protein
REFERENCE	evm.model.scaffold699_size96700.4	serine/threonine-protein kinase CDL1-like	EC:2.7.11	T	AT1G20650.1	Protein_kinase_superfamily_protein
REFERENCE	evm.model.scaffold697_size97550.10	Serine/threonine-protein kinase	EC:2.7.11	T	AT2G07180.2	Protein_kinase_superfamily_protein
REFERENCE	evm.model.scaffold684_size103286.2	probable serine/threonine-protein kinase At1g01540	EC:2.7.11.25;EC:2.7.11	T	AT1G01540.2	Protein_kinase_superfamily_protein
REFERENCE	evm.model.scaffold683_size103566.12	26S proteasome regulatory complex, subunit PSMD10	EC:2.7.11;EC:4.6.1.2	S	AT4G10720.1	Ankyrin_repeat_family_protein
REFERENCE	evm.model.scaffold683_size103566.11	26S proteasome regulatory complex, subunit PSMD10	EC:2.7.11;EC:4.6.1.2	S	AT4G10720.1	Ankyrin_repeat_family_protein
REFERENCE	evm.model.scaffold683_size103566.10	26S proteasome regulatory complex, subunit PSMD10	EC:2.7.11;EC:4.6.1.2	S	AT4G10720.1	Ankyrin_repeat_family_protein
REFERENCE	evm.model.scaffold678_size107199.21	Protein kinase-like domain-containing protein	EC:2.7.11	T	AT2G28930.2	protein_kinase_1B
REFERENCE	evm.model.scaffold678_size107199.20	protein kinase APK1A, chloroplastic-like	EC:2.7.11	T	AT1G07570.5	Protein_kinase_superfamily_protein
REFERENCE	evm.model.scaffold676_size108253.4	PTI1-like tyrosine-protein kinase 3	EC:2.7.10;EC:2.7.11;EC:2.7.10.2	T	AT3G59350.6	Protein_kinase_superfamily_protein
REFERENCE	evm.model.scaffold672_size109657.22	Serine/threonine-protein kinase	EC:2.7.11	T	AT2G24370.1	kinase_with_adenine_nucleotide_alpha_hydrolases-like_domain-containing_protein
REFERENCE	evm.model.scaffold670_size110176.15	Non-specific serine/threonine protein kinase	EC:2.7.11	S	noTAIR	NULL
REFERENCE	evm.model.scaffold668_size110816.26	Protein kinase PINOID-like	EC:2.7.11	T	AT2G34650.1	Protein_kinase_superfamily_protein
REFERENCE	evm.model.scaffold667_size110899.8	Calcium-dependent protein kinase	EC:2.7.11;EC:2.7.11.17	T	AT1G35670.1	calcium-dependent_protein_kinase_2
REFERENCE	evm.model.scaffold658_size114973.16	protein kinase 2B, chloroplastic-like	EC:2.7.11	T	AT2G02800.2	protein_kinase_2B
REFERENCE	evm.model.scaffold653_size116565.1	protein NSP-INTERACTING KINASE 2-like isoform X1	EC:2.7.11	T	AT3G25560.2	NSP-interacting_kinase_2
REFERENCE	evm.model.scaffold651_size116853.27	Receptor-like protein 12	EC:2.7.11;EC:1.3.1.74	S	AT1G03440.1	Leucine-rich_repeat_(LRR)_family_protein
REFERENCE	evm.model.scaffold650_size116903.35	BRASSINOSTEROID INSENSITIVE 1-associated receptor kinase 1-like isoform X2	EC:2.7.11	T	AT4G33430.1	BRI1-associated_receptor_kinase
REFERENCE	evm.model.scaffold650_size116903.5	BRI1 protein	EC:2.7.11	T	AT4G39400.1	Leucine-rich_receptor-like_protein_kinase_family_protein
REFERENCE	evm.model.scaffold649_size118696.10	serine/threonine-protein kinase BLUS1-like	EC:2.7.11	T	AT5G14720.2	Protein_kinase_superfamily_protein
REFERENCE	evm.model.scaffold649_size118696.5	3-phosphoinositide-dependent protein kinase 2	EC:2.7.11	T	AT3G10540.1	3-phosphoinositide-dependent_protein_kinase
REFERENCE	evm.model.scaffold648_size118734.2	Putative receptor-like protein kinase	EC:2.7.11	T	AT5G56460.1	Protein_kinase_superfamily_protein
REFERENCE	evm.model.scaffold647_size119004.20	Non-specific serine/threonine protein kinase	EC:2.7.11	T	AT3G23310.1	AGC_(cAMP-dependent%2C_cGMP-dependent_and_protein_kinase_C)_kinase_family_protein
REFERENCE	evm.model.scaffold645_size119521.8	proline-rich receptor-like protein kinase PERK3 isoform X2	EC:2.7.11	T	AT3G26700.3	Protein_kinase_superfamily_protein
REFERENCE	evm.model.scaffold640_size121989.2	serine/threonine-protein kinase SAPK7-like	EC:2.7.11	T	AT5G63650.1	SNF1-related_protein_kinase_2.5
REFERENCE	evm.model.scaffold637_size123618.32	serine/threonine-protein kinase dst1	EC:2.7.11	T	AT1G69220.1	Protein_kinase_superfamily_protein
REFERENCE	evm.model.scaffold637_size123618.18	probable receptor-like serine/threonine-protein kinase At4g34500	EC:2.7.11	T	AT4G34500.1	Protein_kinase_superfamily_protein
REFERENCE	evm.model.scaffold637_size123618.5	Calcium-dependent protein kinase 34-like	EC:2.7.11;EC:2.7.11.17	T	AT5G12180.1	calcium-dependent_protein_kinase_17
REFERENCE	evm.model.scaffold631_size125893.28	Serine/threonine-protein kinase TIO	EC:2.7.11	T	AT1G50240.3	kinase_family_with_ARM_repeat_domain-containing_protein
REFERENCE	evm.model.scaffold631_size125893.13	Serine/threonine-protein kinase CTR1	EC:2.7.11;EC:2.7.12.1	T	AT5G03730.2	Protein_kinase_superfamily_protein
REFERENCE	evm.model.scaffold631_size125893.10	26S proteasome regulatory complex, subunit PSMD10	EC:2.7.11;EC:4.6.1.2	S	noTAIR	NULL
REFERENCE	evm.model.scaffold630_size126236.17	serine/threonine-protein kinase HT1-like	EC:2.7.11	T	AT1G62400.1	Protein_kinase_superfamily_protein
REFERENCE	evm.model.scaffold630_size126236.5	Putative receptor-like protein kinase	EC:2.7.11	T	AT4G32000.2	Protein_kinase_superfamily_protein
REFERENCE	evm.model.scaffold629_size126420.4	Calcium-dependent protein kinase 17	EC:2.7.11;EC:2.7.11.17	T	AT5G12180.1	calcium-dependent_protein_kinase_17
REFERENCE	evm.model.scaffold627_size127100.17	Mitogen-activated protein kinase	EC:2.7.11;EC:2.7.11.24	T	AT1G73670.1	MAP_kinase_15
REFERENCE	evm.model.scaffold627_size127100.15	Leucine-rich repeat receptor-like protein kinase tdr	EC:2.7.11	T	AT5G51350.1	Leucine-rich_repeat_transmembrane_protein_kinase_family_protein
REFERENCE	evm.model.scaffold626_size127221.12	PTI1-like tyrosine-protein kinase	EC:2.7.10;EC:2.7.11;EC:2.7.10.2	T	AT1G52540.1	Protein_kinase_superfamily_protein
REFERENCE	evm.model.scaffold624_size127768.25	Calcium-dependent protein kinase 20	EC:2.7.11;EC:2.7.11.17	T	AT2G38910.1	calcium-dependent_protein_kinase_20
REFERENCE	evm.model.scaffold624_size127768.8	Cysteine-rich receptor-like protein kinase 10	EC:2.7.11	T	AT4G23180.2	cysteine-rich_RLK_(RECEPTOR-like_protein_kinase)_10
REFERENCE	evm.model.scaffold623_size127870.14	Mitogen-activated protein kinase kinase	EC:2.7.11;EC:2.7.12.1	T	AT1G51660.1	mitogen-activated_protein_kinase_kinase_4
REFERENCE	evm.model.scaffold622_size128123.32	Non-specific serine/threonine protein kinase	EC:2.7.11	O	AT3G29270.2	RING/U-box_superfamily_protein
REFERENCE	evm.model.scaffold622_size128123.14	proline-rich receptor-like protein kinase PERK3 isoform X2	EC:2.7.11	T	AT3G26700.3	Protein_kinase_superfamily_protein
REFERENCE	evm.model.scaffold622_size128123.10	Serine/threonine-protein kinase PBL27	EC:2.7.10;EC:2.7.11;EC:2.7.10.2	T	AT5G18610.3	Protein_kinase_superfamily_protein
REFERENCE	evm.model.scaffold621_size128310.29	Non-specific serine/threonine protein kinase	EC:2.7.11;EC:2.7.11.13	T	AT3G08720.4	serine/threonine_protein_kinase_2
REFERENCE	evm.model.scaffold620_size128314.24	protein kinase 2B, chloroplastic-like	EC:2.7.11	T	AT2G02800.2	protein_kinase_2B
REFERENCE	evm.model.scaffold618_size128606.28	receptor-like protein kinase HSL1	EC:2.7.11	T	AT1G28440.1	HAESA-like_1
REFERENCE	evm.model.scaffold615_size129786.23	Serine/threonine-protein kinase HT1	EC:2.7.11	T	AT1G62400.1	Protein_kinase_superfamily_protein
REFERENCE	evm.model.scaffold615_size129786.10	Serine/threonine-protein kinase D6PKL2 isoform A	EC:2.7.11	T	AT5G47750.1	D6_protein_kinase_like_2
REFERENCE	evm.model.scaffold614_size131169.30	Acetylornithine aminotransferase, mitochondrial-like	EC:2.7.11;EC:2.6.1.11	E	AT1G80600.1	HOPW1-1-interacting_1
REFERENCE	evm.model.scaffold612_size132011.27	Serine/threonine protein kinase	EC:2.7.11	T	AT1G56140.1	Leucine-rich_repeat_transmembrane_protein_kinase
REFERENCE	evm.model.scaffold611_size132032.8	eIF-2-alpha kinase GCN2-like	EC:2.7.11	T	AT3G59410.2	protein_kinase_family_protein
REFERENCE	evm.model.scaffold609_size132898.17	Serine/threonine-protein kinase AGC1-7	EC:2.7.11	T	AT1G79250.4	AGC_kinase_1.7
REFERENCE	evm.model.scaffold609_size132898.16	Serine/threonine-protein kinase AGC1-7	EC:2.7.11	T	AT1G79250.4	AGC_kinase_1.7
REFERENCE	evm.model.scaffold609_size132898.5	ABC1-like kinase (Fragment)	EC:2.7.11;EC:7.2.2.2;EC:2.7.11.22	S	AT1G79600.1	Protein_kinase_superfamily_protein
REFERENCE	evm.model.scaffold608_size133036.19	Non-specific serine/threonine protein kinase	EC:2.7.11	BDLT	AT3G48190.3	Serine/Threonine-kinase_ATM-like_protein
REFERENCE	evm.model.scaffold602_size134299.21	Serine/threonine-protein kinase WNK1	EC:2.7.11	T	AT3G22420.1	with_no_lysine_(K)_kinase_2
REFERENCE	evm.model.scaffold601_size134591.18	Putative serine/threonine-protein kinase	EC:2.7.11;EC:2.7.11.22	T	AT1G54610.3	Protein_kinase_superfamily_protein
REFERENCE	evm.model.scaffold599_size134888.15	Serine/threonine-protein kinase Nek2	EC:2.7.11	T	AT3G04810.3	NIMA-related_kinase_2
REFERENCE	evm.model.scaffold599_size134888.14	Serine/threonine-protein kinase Nek2	EC:2.7.11	T	AT3G04810.3	NIMA-related_kinase_2
REFERENCE	evm.model.scaffold597_size137995.1	transformation/transcription domain-associated protein-like	EC:2.7.11	BDLT	AT2G17930.1	Phosphatidylinositol_3-_and_4-kinase_family_protein_with_FAT_domain-containing_protein
REFERENCE	evm.model.scaffold596_size138122.5	probably inactive leucine-rich repeat receptor-like protein kinase IMK2	EC:2.7.11	T	AT3G56100.1	meristematic_receptor-like_kinase
REFERENCE	evm.model.scaffold595_size138481.21	probable serine/threonine-protein kinase WNK5	EC:2.7.11	T	AT3G51630.2	with_no_lysine_(K)_kinase_5
REFERENCE	evm.model.scaffold595_size138481.2	inactive LRR receptor-like serine/threonine-protein kinase BIR2	EC:2.7.11	T	AT3G28450.1	Leucine-rich_repeat_protein_kinase_family_protein
REFERENCE	evm.model.scaffold591_size139029.21	CDPK-related kinase 4-like isoform X1	EC:2.7.11;EC:2.7.11.17	T	AT5G24430.1	Calcium-dependent_protein_kinase_(CDPK)_family_protein
REFERENCE	evm.model.scaffold590_size139453.46	Non-specific serine/threonine protein kinase	EC:2.7.11	T	AT5G45820.1	CBL-interacting_protein_kinase_20
REFERENCE	evm.model.scaffold590_size139453.19	DENN domain and WD repeat-containing protein SCD1	EC:2.7.11;EC:2.7.11.17;EC:2.7.11.7	T	AT1G49040.1	stomatal_cytokinesis_defective_/_SCD1_protein_(SCD1)
REFERENCE	evm.model.scaffold589_size139569.5	Autophagy-related protein 16	EC:2.7.11;EC:2.7.11.17;EC:2.7.11.7	S	AT5G50230.1	Transducin/WD40_repeat-like_superfamily_protein
REFERENCE	evm.model.scaffold588_size139614.29	serine/threonine-protein kinase TOUSLED-like	EC:2.7.11	T	AT5G20930.1	Protein_kinase_superfamily_protein
REFERENCE	evm.model.scaffold588_size139614.2	protein phosphatase 2C and cyclic nucleotide-binding/kinase domain-containing protein	EC:2.7.11;EC:3.1.3.16	T	AT2G20050.1	protein_phosphatase_2C_and_cyclic_nucleotide-binding/kinase_domain-containing_protein
REFERENCE	evm.model.scaffold587_size140297.34	Cysteine-rich receptor-like protein kinase 29	EC:2.7.11	T	AT4G23230.1	cysteine-rich_RECEPTOR-like_kinase
REFERENCE	evm.model.scaffold587_size140297.24	Inactive leucine-rich repeat receptor-like serine/threonine-protein kinase	EC:2.7.11;EC:1.3.1.74	T	AT1G10850.1	Leucine-rich_repeat_protein_kinase_family_protein
REFERENCE	evm.model.scaffold586_size141285.11	Non-specific serine/threonine protein kinase	EC:2.7.11	T	AT4G24400.1	CBL-interacting_protein_kinase_8
REFERENCE	evm.model.scaffold583_size141823.18	Putative serine/threonine protein kinase IRE3	EC:2.7.11	T	AT3G17850.1	Protein_kinase_superfamily_protein
REFERENCE	evm.model.scaffold583_size141823.4	serine/threonine-protein kinase CDL1-like	EC:2.7.11	T	AT1G20650.1	Protein_kinase_superfamily_protein
REFERENCE	evm.model.scaffold578_size145013.7	Casein kinase II subunit beta	EC:2.7.11	DKT	AT5G47080.1	casein_kinase_II_beta_chain_1
REFERENCE	evm.model.scaffold573_size148756.1	Serine/threonine-protein kinase ATM (Fragment)	EC:2.7.11	BDLT	AT3G48190.2	Serine/Threonine-kinase_ATM-like_protein
REFERENCE	evm.model.scaffold567_size152524.36	Serine/threonine-protein kinase D6PKL2 isoform A	EC:2.7.11	T	AT5G47750.1	D6_protein_kinase_like_2
REFERENCE	evm.model.scaffold567_size152524.10	putative serine/threonine-protein kinase	EC:2.7.10;EC:2.7.11;EC:2.7.10.2	T	AT1G16670.1	Protein_kinase_superfamily_protein
REFERENCE	evm.model.scaffold566_size152642.33	Cyclin-dependent kinase B2-2	EC:2.7.11;EC:2.7.11.22	T	AT1G76540.1	cyclin-dependent_kinase_B2%3B1
REFERENCE	evm.model.scaffold566_size152642.21	Putative receptor-like protein kinase	EC:2.7.11	T	AT2G21480.1	Malectin/receptor-like_protein_kinase_family_protein
REFERENCE	evm.model.scaffold563_size154924.7	Serine/threonine protein kinase	EC:2.7.11	T	AT1G77280.2	kinase_with_adenine_nucleotide_alpha_hydrolases-like_domain-containing_protein
REFERENCE	evm.model.scaffold562_size155008.21	Casein kinase II subunit beta	EC:2.7.11	DKT	AT5G47080.1	casein_kinase_II_beta_chain_1
REFERENCE	evm.model.scaffold562_size155008.20	Casein kinase II subunit beta	EC:2.7.11	DKT	AT4G17640.1	casein_kinase_II_beta_chain_2
REFERENCE	evm.model.scaffold561_size156615.32	serine/threonine-protein kinase D6PKL1	EC:2.7.11	T	AT2G44830.3	Protein_kinase_superfamily_protein
REFERENCE	evm.model.scaffold561_size156615.31	serine/threonine-protein kinase D6PKL1	EC:2.7.11	T	AT2G44830.3	Protein_kinase_superfamily_protein
REFERENCE	evm.model.scaffold560_size156814.2	LRR-RLK (Fragment)	EC:2.7.11;EC:1.3.1.74	S	AT1G03440.1	Leucine-rich_repeat_(LRR)_family_protein
REFERENCE	evm.model.scaffold559_size158248.28	putative receptor-like protein kinase At4g00960	EC:2.7.11	T	AT4G23180.1	cysteine-rich_RLK_(RECEPTOR-like_protein_kinase)_10
REFERENCE	evm.model.scaffold558_size158525.7	calcium-dependent protein kinase 1-like	EC:2.7.11;EC:2.7.11.17	T	AT5G04870.1	calcium_dependent_protein_kinase_1
REFERENCE	evm.model.scaffold556_size159941.37	serine/threonine-protein kinase-like protein ACR4	EC:2.7.11	T	AT3G59420.1	crinkly4
REFERENCE	evm.model.scaffold554_size161974.13	Non-specific serine/threonine protein kinase	EC:2.7.11	T	AT2G30360.1	SOS3-interacting_protein_4
REFERENCE	evm.model.scaffold552_size162563.27	Mitogen-activated protein kinase kinase kinase	EC:2.7.10;EC:2.7.11;EC:2.7.10.2	T	AT5G18610.3	Protein_kinase_superfamily_protein
REFERENCE	evm.model.scaffold551_size162907.20	probable LRR receptor-like serine/threonine-protein kinase At1g74360	EC:2.7.11	T	AT1G74360.1	Leucine-rich_repeat_protein_kinase_family_protein
REFERENCE	evm.model.scaffold550_size162924.43	pollen receptor-like kinase 2	EC:2.7.11	T	AT5G35390.1	Leucine-rich_repeat_protein_kinase_family_protein
REFERENCE	evm.model.scaffold550_size162924.34	E3 ubiquitin-protein ligase KEG-like	EC:2.7.11	T	AT4G32250.3	Protein_kinase_superfamily_protein
REFERENCE	evm.model.scaffold549_size164026.17	Protein STRUBBELIG-RECEPTOR FAMILY 2	EC:2.7.11	T	AT5G06820.1	STRUBBELIG-receptor_family_2
REFERENCE	evm.model.scaffold548_size165573.14	Serine/threonine-protein kinase CTR1	EC:2.7.11;EC:2.7.12.1	T	AT5G03730.2	Protein_kinase_superfamily_protein
REFERENCE	evm.model.scaffold546_size167141.9	probable serine/threonine-protein kinase WNK5	EC:2.7.11	T	AT3G51630.2	with_no_lysine_(K)_kinase_5
REFERENCE	evm.model.scaffold546_size167141.6	probable serine/threonine-protein kinase NAK	EC:2.7.11	T	AT3G08760.3	Protein_kinase_superfamily_protein
REFERENCE	evm.model.scaffold545_size168148.3	probable LRR receptor-like serine/threonine-protein kinase At1g56140	EC:2.7.11	T	AT1G56140.1	Leucine-rich_repeat_transmembrane_protein_kinase
REFERENCE	evm.model.scaffold535_size176836.2	proline-rich receptor-like protein kinase PERK1	EC:2.7.11	T	AT3G24550.1	proline_extensin-like_receptor_kinase_1
REFERENCE	evm.model.scaffold530_size179357.34	C-type lectin receptor-like tyrosine-protein kinase At1g52310 isoform X1	EC:2.7.10;EC:2.7.11	T	AT1G52310.1	protein_kinase_family_protein_/_C-type_lectin_domain-containing_protein
REFERENCE	evm.model.scaffold529_size179514.24	protein kinase APK1A, chloroplastic-like	EC:2.7.10;EC:2.7.11	T	AT1G07570.5	Protein_kinase_superfamily_protein
REFERENCE	evm.model.scaffold529_size179514.8	probable receptor-like protein kinase At1g49730	EC:2.7.10;EC:2.7.11	T	AT5G22050.2	Protein_kinase_superfamily_protein
REFERENCE	evm.model.scaffold527_size181175.6	mitogen-activated protein kinase kinase 2-like	EC:2.7.11;EC:2.7.12.1	T	AT4G29810.1	MAP_kinase_kinase_2
REFERENCE	evm.model.scaffold527_size181175.2	Receptor-like Serine/Threonine-kinase ALE2	EC:2.7.11	T	AT5G56890.1	Protein_kinase_superfamily_protein
REFERENCE	evm.model.scaffold524_size182843.43	Protein NSP-INTERACTING KINASE 1-like	EC:2.7.11;EC:1.3.1.74	T	AT5G16000.1	NSP-interacting_kinase_1
REFERENCE	evm.model.scaffold524_size182843.36	LysM domain receptor-like kinase 4	EC:2.7.11	T	AT2G23770.1	protein_kinase_family_protein_/_peptidoglycan-binding_LysM_domain-containing_protein
REFERENCE	evm.model.scaffold524_size182843.1	inactive LRR receptor-like serine/threonine-protein kinase BIR2	EC:2.7.11	T	AT3G28450.1	Leucine-rich_repeat_protein_kinase_family_protein
REFERENCE	evm.model.scaffold523_size183550.21	protein STRUBBELIG-RECEPTOR FAMILY 6-like	EC:2.7.10;EC:2.7.11	T	AT1G53730.1	STRUBBELIG-receptor_family_6
REFERENCE	evm.model.scaffold523_size183550.7	inactive protein kinase SELMODRAFT_444075-like	EC:2.7.11	T	AT3G13690.3	kinase_with_adenine_nucleotide_alpha_hydrolases-like_domain-containing_protein
REFERENCE	evm.model.scaffold519_size185338.6	probable serine/threonine-protein kinase At1g54610	EC:2.7.11;EC:2.7.11.22	T	AT5G50860.1	Protein_kinase_superfamily_protein
REFERENCE	evm.model.scaffold519_size185338.1	Cysteine-rich receptor-like protein kinase 29-like protein (Fragment)	EC:2.7.11	T	AT4G23180.3	cysteine-rich_RLK_(RECEPTOR-like_protein_kinase)_10
REFERENCE	evm.model.scaffold518_size185628.14	probable LRR receptor-like serine/threonine-protein kinase RFK1 isoform X1	EC:2.7.11	T	AT1G29750.2	receptor-like_kinase_in_flowers_1
REFERENCE	evm.model.scaffold515_size186375.6	E3 ubiquitin-protein ligase keg	EC:2.7.11	OT	AT5G13530.1	protein_kinases%3Bubiquitin-protein_ligase
REFERENCE	evm.model.scaffold514_size186587.45	tyrosine-sulfated glycopeptide receptor 1	EC:2.7.11	T	AT1G72300.1	Leucine-rich_receptor-like_protein_kinase_family_protein
REFERENCE	evm.model.scaffold514_size186587.38	Receptor-like cytosolic serine/threonine-protein kinase RBK2	EC:2.7.11	T	AT1G77280.2	kinase_with_adenine_nucleotide_alpha_hydrolases-like_domain-containing_protein
REFERENCE	evm.model.scaffold514_size186587.37	probable receptor-like serine/threonine-protein kinase At5g57670	EC:2.7.11	T	AT5G63940.1	kinase_with_adenine_nucleotide_alpha_hydrolases-like_domain-containing_protein
REFERENCE	evm.model.scaffold514_size186587.36	Myosin heavy chain kinase	EC:2.7.11;EC:2.7.11.17;EC:2.7.11.7	S	AT1G21651.1	zinc_ion_binding_protein
REFERENCE	evm.model.scaffold514_size186587.35	Microtubule binding protein YTM1 (Contains WD40 repeats)	EC:2.7.11;EC:2.7.11.17;EC:2.7.11.7	S	AT1G21651.1	zinc_ion_binding_protein
REFERENCE	evm.model.scaffold506_size193237.21	putative receptor-like protein kinase At1g80870	EC:2.7.11	T	AT1G80870.1	Protein_kinase_superfamily_protein
REFERENCE	evm.model.scaffold504_size193966.25	protein STRUBBELIG-RECEPTOR FAMILY 3-like	EC:2.7.11	T	AT4G03390.2	STRUBBELIG-receptor_family_3
REFERENCE	evm.model.scaffold501_size196671.48	receptor-like kinase TMK3	EC:2.7.11	T	AT2G01820.1	Leucine-rich_repeat_protein_kinase_family_protein
REFERENCE	evm.model.scaffold500_size197362.21	probable LRR receptor-like serine/threonine-protein kinase At4g20940	EC:2.7.11	T	AT4G20940.1	Leucine-rich_receptor-like_protein_kinase_family_protein
REFERENCE	evm.model.scaffold498_size197487.49	Serine/threonine protein kinase	EC:2.7.11	T	AT1G49730.1	Protein_kinase_superfamily_protein
REFERENCE	evm.model.scaffold497_size197723.2	Cysteine-rich receptor-like protein kinase 29	EC:2.7.11	T	AT4G00960.2	Protein_kinase_superfamily_protein
REFERENCE	evm.model.scaffold491_size201213.43	casein kinase I-like	EC:2.7.11	T	AT1G72710.1	casein_kinase_1-like_protein_2
REFERENCE	evm.model.scaffold490_size201484.27	Cyclin-dependent kinase F-1	EC:2.7.11;EC:2.7.11.22	T	AT4G28980.3	CDK-activating_kinase_1AT
REFERENCE	evm.model.scaffold488_size202194.34	probable serine/threonine protein kinase IRE4 isoform X1	EC:2.7.11	T	AT1G45160.2	Protein_kinase_superfamily_protein
REFERENCE	evm.model.scaffold488_size202194.29	Mitogen-activated protein kinase	EC:2.7.11;EC:2.7.11.24	T	AT1G10210.3	mitogen-activated_protein_kinase_1
REFERENCE	evm.model.scaffold488_size202194.24	probable LRR receptor-like serine/threonine-protein kinase At4g20940 isoform X2	EC:2.7.11	T	AT4G20940.1	Leucine-rich_receptor-like_protein_kinase_family_protein
REFERENCE	evm.model.scaffold488_size202194.12	UBN2_2 domain-containing protein (Fragment)	EC:2.7.11	T	noTAIR	NULL
REFERENCE	evm.model.scaffold488_size202194.6	C-type lectin receptor-like tyrosine-protein kinase	EC:2.7.10;EC:2.7.11	T	AT1G52310.1	protein_kinase_family_protein_/_C-type_lectin_domain-containing_protein
REFERENCE	evm.model.scaffold487_size202209.46	mitogen-activated protein kinase kinase 5-like	EC:2.7.11	T	AT3G21220.2	MAP_kinase_kinase_5
REFERENCE	evm.model.scaffold487_size202209.45	Serine/threonine protein kinase	EC:2.7.11	T	AT2G17520.1	Endoribonuclease/protein_kinase_IRE1-like_protein
REFERENCE	evm.model.scaffold487_size202209.41	probable serine/threonine-protein kinase WNK4 isoform X4	EC:2.7.11	T	AT5G58350.1	with_no_lysine_(K)_kinase_4
REFERENCE	evm.model.scaffold487_size202209.20	probable LRR receptor-like serine/threonine-protein kinase At1g14390	EC:2.7.11	T	AT1G14390.1	Leucine-rich_repeat_protein_kinase_family_protein
REFERENCE	evm.model.scaffold486_size202863.44	phytosulfokine receptor 1	EC:2.7.11;EC:4.6.1.2	T	AT2G02220.1	phytosulfokin_receptor_1
REFERENCE	evm.model.scaffold486_size202863.40	Cysteine-rich receptor-like protein kinase 10	EC:2.7.10;EC:2.7.11;EC:2.7.10.2	T	AT1G70740.1	Protein_kinase_superfamily_protein
REFERENCE	evm.model.scaffold486_size202863.24	Putative leucine-rich repeat receptor-like protein kinase	EC:2.7.11	S	AT1G25570.1	Di-glucose_binding_protein_with_Leucine-rich_repeat_domain-containing_protein
REFERENCE	evm.model.scaffold483_size203934.42	Non-specific serine/threonine protein kinase	EC:2.7.11	T	AT3G17510.1	CBL-interacting_protein_kinase_1
REFERENCE	evm.model.scaffold483_size203934.32	LRR receptor-like serine/threonine-protein kinase FEI 2	EC:2.7.11.25;EC:2.7.11	T	AT5G62710.2	Leucine-rich_repeat_protein_kinase_family_protein
REFERENCE	evm.model.scaffold483_size203934.25	Brassinosteroid insensitive 1-associated receptor kinase 1	EC:2.7.10;EC:2.7.10.1;EC:2.7.11	T	AT4G33430.1	BRI1-associated_receptor_kinase
REFERENCE	evm.model.scaffold482_size205035.25	Cysteine-rich receptor-like protein kinase 10	EC:2.7.10;EC:2.7.11;EC:2.7.10.2	T	AT1G70740.1	Protein_kinase_superfamily_protein
REFERENCE	evm.model.scaffold481_size205178.41	Non-specific serine/threonine protein kinase	EC:2.7.11	T	AT5G25110.1	CBL-interacting_protein_kinase_25
REFERENCE	evm.model.scaffold479_size206789.14	Non-specific serine/threonine protein kinase	EC:2.7.11	T	AT2G20470.3	AGC_(cAMP-dependent%2C_cGMP-dependent_and_protein_kinase_C)_kinase_family_protein
REFERENCE	evm.model.scaffold478_size208472.33	receptor-like protein kinase HAIKU2	EC:2.7.11	T	AT1G72180.1	Leucine-rich_receptor-like_protein_kinase_family_protein
REFERENCE	evm.model.scaffold472_size211008.52	receptor-like protein kinase ANXUR1	EC:2.7.11	T	AT3G04690.1	Malectin/receptor-like_protein_kinase_family_protein
REFERENCE	evm.model.scaffold471_size212349.14	myosin heavy chain kinase B-like	EC:2.7.11;EC:2.7.11.17;EC:2.7.11.7	S	AT2G26490.1	Transducin/WD40_repeat-like_superfamily_protein
REFERENCE	evm.model.scaffold470_size212680.58	Calcium-dependent protein kinase 32	EC:2.7.11;EC:2.7.11.17	T	AT3G57530.1	calcium-dependent_protein_kinase_32
REFERENCE	evm.model.scaffold465_size216503.46	WD repeat-containing protein 3	EC:2.7.11;EC:2.7.11.17;EC:2.7.11.7	A	AT3G21540.1	transducin_family_protein_/_WD-40_repeat_family_protein
REFERENCE	evm.model.scaffold463_size217393.40	Mitogen-activated protein kinase	EC:2.7.11;EC:2.7.11.24	T	AT5G19010.1	mitogen-activated_protein_kinase_16
REFERENCE	evm.model.scaffold461_size219499.24	Receptor-like serine/threonine-protein kinase NCRK	EC:2.7.11	T	AT2G28250.6	Protein_kinase_superfamily_protein
REFERENCE	evm.model.scaffold461_size219499.15	Mitogen-activated protein kinase	EC:2.7.11;EC:2.7.11.24	T	AT3G45640.1	mitogen-activated_protein_kinase_3
REFERENCE	evm.model.scaffold461_size219499.2	xylulose 5-phosphate/phosphate translocator, chloroplastic	EC:2.7.11;EC:2.7.11.22	EG	AT5G17630.1	Nucleotide/sugar_transporter_family_protein
REFERENCE	evm.model.scaffold458_size221370.15	Serine/threonine-protein kinase CTR1	EC:2.7.11;EC:2.7.12.1	T	AT5G03730.2	Protein_kinase_superfamily_protein
REFERENCE	evm.model.scaffold453_size224172.28	Receptor-like protein 12	EC:2.7.11;EC:1.3.1.74	S	AT4G03010.1	RNI-like_superfamily_protein
REFERENCE	evm.model.scaffold453_size224172.18	receptor-like cytosolic serine/threonine-protein kinase RBK2	EC:2.7.11	T	AT5G35960.2	Protein_kinase_family_protein
REFERENCE	evm.model.scaffold451_size225693.37	serine/threonine-protein kinase/endoribonuclease IRE1a	EC:2.7.11	T	AT2G17520.1	Endoribonuclease/protein_kinase_IRE1-like_protein
REFERENCE	evm.model.scaffold451_size225693.36	serine/threonine-protein kinase/endoribonuclease IRE1a	EC:2.7.11	T	AT2G17520.1	Endoribonuclease/protein_kinase_IRE1-like_protein
REFERENCE	evm.model.scaffold451_size225693.35	Serine/threonine protein kinase	EC:2.7.11	T	AT5G24360.1	inositol_requiring_1-1
REFERENCE	evm.model.scaffold451_size225693.16	Serine/threonine protein kinase	EC:2.7.11	T	AT5G66880.2	sucrose_nonfermenting_1(SNF1)-related_protein_kinase_2.3
REFERENCE	evm.model.scaffold451_size225693.15	CDPK-related kinase 5-like	EC:2.7.11;EC:2.7.11.17;EC:1.11.1.7	T	AT3G50530.1	CDPK-related_kinase
REFERENCE	evm.model.scaffold449_size226149.4	Protein QUIRKY	EC:2.7.11;EC:2.7.11.13	S	AT1G74720.1	C2_calcium/lipid-binding_plant_phosphoribosyltransferase_family_protein
REFERENCE	evm.model.scaffold447_size226588.47	casein kinase I isoform delta-like	EC:2.7.11	T	AT1G72710.1	casein_kinase_1-like_protein_2
REFERENCE	evm.model.scaffold445_size228148.42	mitogen-activated protein kinase kinase 5-like	EC:2.7.11;EC:2.7.12.1	T	AT1G51660.1	mitogen-activated_protein_kinase_kinase_4
REFERENCE	evm.model.scaffold443_size229734.68	serine/threonine-protein kinase dst1	EC:2.7.11	T	AT1G69220.1	Protein_kinase_superfamily_protein
REFERENCE	evm.model.scaffold443_size229734.36	Cyclin-dependent kinase G-2	EC:2.7.11;EC:2.7.11.22	T	AT1G67580.2	Protein_kinase_superfamily_protein
REFERENCE	evm.model.scaffold443_size229734.20	Putative serine/threonine-protein kinase	EC:2.7.11;EC:2.7.11.22	T	AT1G54610.3	Protein_kinase_superfamily_protein
REFERENCE	evm.model.scaffold443_size229734.19	Putative serine/threonine-protein kinase	EC:2.7.11;EC:2.7.11.22	T	AT1G54610.3	Protein_kinase_superfamily_protein
REFERENCE	evm.model.scaffold443_size229734.18	probable LRR receptor-like serine/threonine-protein kinase At1g67720	EC:2.7.11	S	AT3G05990.1	Leucine-rich_repeat_(LRR)_family_protein
REFERENCE	evm.model.scaffold443_size229734.2	receptor-like cytosolic serine/threonine-protein kinase RBK2	EC:2.7.11	T	AT3G05140.1	ROP_binding_protein_kinases_2
REFERENCE	evm.model.scaffold441_size232911.38	putative leucine-rich repeat receptor-like serine/threonine-protein kinase At2g14440	EC:2.7.11	S	AT1G25570.1	Di-glucose_binding_protein_with_Leucine-rich_repeat_domain-containing_protein
REFERENCE	evm.model.scaffold441_size232911.32	Protein NSP-INTERACTING KINASE 1	EC:2.7.11	T	AT5G16000.1	NSP-interacting_kinase_1
REFERENCE	evm.model.scaffold441_size232911.2	Mitogen-activated protein kinase kinase kinase 1	EC:2.7.11.25;EC:2.7.11	O	AT5G11620.2	SWIM_zinc_finger_family_protein_/_mitogen-activated_protein_kinase_kinase_kinase_(MAPKKK)-like_protein
REFERENCE	evm.model.scaffold440_size235831.24	receptor-like serine/threonine-protein kinase SD1-8	EC:2.7.11	T	AT4G21380.1	receptor_kinase_3
REFERENCE	evm.model.scaffold439_size236221.48	Receptor-like serine/threonine-protein kinase	EC:2.7.11	T	AT2G45590.1	Protein_kinase_superfamily_protein
REFERENCE	evm.model.scaffold439_size236221.41	myosin heavy chain kinase B-like	EC:2.7.11;EC:2.7.11.17;EC:2.7.11.7	S	AT3G51930.1	Transducin/WD40_repeat-like_superfamily_protein
REFERENCE	evm.model.scaffold437_size236406.42	Putative serine/threonine-protein kinase WNK4	EC:2.7.11	T	AT3G18750.5	with_no_lysine_(K)_kinase_6
REFERENCE	evm.model.scaffold435_size236645.34	Protein QUIRKY	EC:2.7.11;EC:2.7.11.13	S	AT1G74720.1	C2_calcium/lipid-binding_plant_phosphoribosyltransferase_family_protein
REFERENCE	evm.model.scaffold435_size236645.16	Serine/threonine-protein kinase D6PKL2 isoform A	EC:2.7.11	T	AT5G47750.1	D6_protein_kinase_like_2
REFERENCE	evm.model.scaffold434_size237078.62	Serine/threonine-protein kinase	EC:2.7.11;EC:2.7.11.22	T	AT5G50860.1	Protein_kinase_superfamily_protein
REFERENCE	evm.model.scaffold432_size238105.53	L-type lectin-domain containing receptor kinase IV.1-like	EC:2.7.11	T	AT2G37710.1	receptor_lectin_kinase
REFERENCE	evm.model.scaffold432_size238105.51	L-type lectin-domain containing receptor kinase IV.1	EC:2.7.11	T	AT3G53810.1	Concanavalin_A-like_lectin_protein_kinase_family_protein
REFERENCE	evm.model.scaffold431_size238522.32	Mitogen-activated protein kinase	EC:2.7.11;EC:2.7.11.24	T	AT5G19010.1	mitogen-activated_protein_kinase_16
REFERENCE	evm.model.scaffold430_size239863.68	calcium-dependent protein kinase 2-like	EC:2.7.11;EC:2.7.11.17	T	AT4G04720.2	calcium-dependent_protein_kinase_21
REFERENCE	evm.model.scaffold430_size239863.24	Non-specific serine/threonine protein kinase	EC:2.7.11	T	AT4G33080.1	AGC_(cAMP-dependent%2C_cGMP-dependent_and_protein_kinase_C)_kinase_family_protein
REFERENCE	evm.model.scaffold428_size240870.40	probable serine/threonine protein kinase IRE	EC:2.7.11	T	AT5G62310.1	AGC_(cAMP-dependent%2C_cGMP-dependent_and_protein_kinase_C)_kinase_family_protein
REFERENCE	evm.model.scaffold426_size243431.56	Putative inactive receptor kinase	EC:2.7.11	T	AT5G58300.3	Leucine-rich_repeat_protein_kinase_family_protein
REFERENCE	evm.model.scaffold426_size243431.54	Non-specific serine/threonine protein kinase	EC:2.7.11	T	AT3G08720.4	serine/threonine_protein_kinase_2
REFERENCE	evm.model.scaffold426_size243431.53	Non-specific serine/threonine protein kinase	EC:2.7.11	T	AT3G08720.4	serine/threonine_protein_kinase_2
REFERENCE	evm.model.scaffold424_size243908.60	Serine/threonine-protein kinase TIO	EC:2.7.11	T	AT1G50240.3	kinase_family_with_ARM_repeat_domain-containing_protein
REFERENCE	evm.model.scaffold419_size248360.48	LEAF RUST 10 DISEASE-RESISTANCE LOCUS RECEPTOR-LIKE PROTEIN KINASE-like 1.5	EC:2.7.11	T	AT1G69910.1	Protein_kinase_superfamily_protein
REFERENCE	evm.model.scaffold419_size248360.21	serine/threonine-protein kinase CDL1-like	EC:2.7.11	T	AT1G07870.1	Protein_kinase_superfamily_protein
REFERENCE	evm.model.scaffold418_size248570.20	3-phosphoinositide-dependent protein kinase 2	EC:2.7.11	T	AT3G10540.1	3-phosphoinositide-dependent_protein_kinase
REFERENCE	evm.model.scaffold418_size248570.11	DEAD-box ATP-dependent RNA helicase 46	EC:2.7.11;EC:3.6.1.3;EC:3.6.4.13;EC:3.6.1.15	A	AT5G14610.2	DEAD_box_RNA_helicase_family_protein
REFERENCE	evm.model.scaffold418_size248570.4	Serine/threonine-protein kinase fray2	EC:2.7.11	T	AT5G14720.2	Protein_kinase_superfamily_protein
REFERENCE	evm.model.scaffold415_size249257.48	Serine/threonine-protein phosphatase	EC:3.4.21;EC:2.7.11;EC:3.1.3.16	DT	AT3G19980.1	flower-specific%2C_phytochrome-associated_protein_phosphatase_3
REFERENCE	evm.model.scaffold415_size249257.37	Ankyrin repeat-containing protein	EC:2.7.11;EC:4.6.1.2	S	AT4G10720.2	Ankyrin_repeat_family_protein
REFERENCE	evm.model.scaffold414_size249511.8	Shaggy-related protein kinase eta	EC:2.7.11	G	AT2G30980.1	SHAGGY-related_protein_kinase_dZeta
REFERENCE	evm.model.scaffold413_size249949.26	Calcium-dependent protein kinase 29	EC:2.7.11;EC:2.7.11.17;EC:2.7.7.6	T	AT1G76040.2	calcium-dependent_protein_kinase_29
REFERENCE	evm.model.scaffold413_size249949.5	receptor protein kinase CLAVATA1	EC:2.7.11	T	AT1G75820.1	Leucine-rich_receptor-like_protein_kinase_family_protein
REFERENCE	evm.model.scaffold412_size250143.43	GPCR kinase	EC:2.7.11	T	AT1G06840.1	Leucine-rich_repeat_protein_kinase_family_protein
REFERENCE	evm.model.scaffold411_size250506.38	switch-associated protein 70	EC:2.7.11	T	AT2G30880.1	Pleckstrin_homology_(PH)_domain-containing_protein
REFERENCE	evm.model.scaffold411_size250506.5	Non-specific serine/threonine protein kinase	EC:2.7.11	T	AT5G35410.1	Protein_kinase_superfamily_protein
REFERENCE	evm.model.scaffold410_size252252.14	Serine/threonine-protein kinase	EC:2.7.11	T	AT2G07180.2	Protein_kinase_superfamily_protein
REFERENCE	evm.model.scaffold409_size254044.15	serine/threonine-protein kinase BLUS1-like	EC:2.7.11	T	AT1G79640.1	Protein_kinase_superfamily_protein
REFERENCE	evm.model.scaffold407_size254605.22	Cysteine rich receptor like kinase	EC:2.7.11	T	AT4G23180.3	cysteine-rich_RLK_(RECEPTOR-like_protein_kinase)_10
REFERENCE	evm.model.scaffold407_size254605.10	Protein kinase-like domain, Concanavalin A-like lectin/glucanase domain protein	EC:2.7.10;EC:2.7.11	T	AT4G21410.3	cysteine-rich_RLK_(RECEPTOR-like_protein_kinase)_29
REFERENCE	evm.model.scaffold407_size254605.7	Serine/threonine-protein kinase fray2	EC:2.7.11	T	AT4G10730.1	Protein_kinase_superfamily_protein
REFERENCE	evm.model.scaffold406_size255187.15	Putative receptor-like protein kinase	EC:2.7.11.25;EC:2.7.11	T	AT5G15080.1	Protein_kinase_superfamily_protein
REFERENCE	evm.model.scaffold403_size258745.6	Serine/threonine protein kinase	EC:2.7.11	T	AT5G37790.1	Protein_kinase_superfamily_protein
REFERENCE	evm.model.scaffold402_size261414.64	Casein kinase II subunit alpha, chloroplastic	EC:2.7.11;EC:2.7.11.23	T	AT2G23070.1	Protein_kinase_superfamily_protein
REFERENCE	evm.model.scaffold402_size261414.62	probable serine/threonine-protein kinase At1g54610	EC:2.7.11;EC:2.7.11.23;EC:2.7.11.22	T	AT1G53050.2	Protein_kinase_superfamily_protein
REFERENCE	evm.model.scaffold398_size264306.22	Casein kinase II subunit beta	EC:2.7.11	DKT	AT5G47080.1	casein_kinase_II_beta_chain_1
REFERENCE	evm.model.scaffold397_size264925.36	Mitogen-activated protein kinase	EC:2.7.11;EC:2.7.11.24	T	AT5G19010.1	mitogen-activated_protein_kinase_16
REFERENCE	evm.model.scaffold396_size267761.52	probable receptor-like protein kinase At5g47070	EC:2.7.11	T	AT5G47070.1	Protein_kinase_superfamily_protein
REFERENCE	evm.model.scaffold395_size268688.12	Protein NSP-INTERACTING KINASE 1-like	EC:2.7.11;EC:1.3.1.74	T	AT5G16000.1	NSP-interacting_kinase_1
REFERENCE	evm.model.scaffold395_size268688.2	inactive LRR receptor-like serine/threonine-protein kinase BIR2	EC:2.7.11	T	AT3G28450.1	Leucine-rich_repeat_protein_kinase_family_protein
REFERENCE	evm.model.scaffold394_size268910.58	receptor-like protein kinase ANXUR1	EC:2.7.11	T	AT3G04690.1	Malectin/receptor-like_protein_kinase_family_protein
REFERENCE	evm.model.scaffold393_size271938.27	mitogen-activated protein kinase kinase kinase A-like	EC:2.7.11	T	AT4G26890.1	mitogen-activated_protein_kinase_kinase_kinase_16
REFERENCE	evm.model.scaffold393_size271938.26	mitogen-activated protein kinase kinase kinase A-like	EC:2.7.11	T	AT4G26890.1	mitogen-activated_protein_kinase_kinase_kinase_16
REFERENCE	evm.model.scaffold393_size271938.12	pto-interacting protein 1-like	EC:2.7.11	T	AT1G48210.7	Protein_kinase_superfamily_protein
REFERENCE	evm.model.scaffold393_size271938.1	probable serine/threonine-protein kinase At1g54610	EC:2.7.11;EC:2.7.11.22	T	AT1G54610.3	Protein_kinase_superfamily_protein
REFERENCE	evm.model.scaffold392_size272084.30	Protein kinase G11A	EC:2.7.11	T	AT5G47750.1	D6_protein_kinase_like_2
REFERENCE	evm.model.scaffold392_size272084.29	Putative LRR receptor-like serine/threonine-protein kinase	EC:2.7.11	T	AT5G56040.2	Leucine-rich_receptor-like_protein_kinase_family_protein
REFERENCE	evm.model.scaffold391_size273082.14	probable serine/threonine-protein kinase WNK11	EC:2.7.11	T	AT5G55560.1	Protein_kinase_superfamily_protein
REFERENCE	evm.model.scaffold390_size273192.2	E3 ubiquitin-protein ligase KEG-like	EC:2.7.11	T	AT4G32250.3	Protein_kinase_superfamily_protein
REFERENCE	evm.model.scaffold389_size273484.51	putative MO25-like protein At5g47540	EC:2.7.11	S	AT5G47540.1	Mo25_family_protein
REFERENCE	evm.model.scaffold389_size273484.40	probable inactive leucine-rich repeat receptor-like protein kinase At1g66830	EC:2.7.11	T	AT1G67510.1	Leucine-rich_repeat_protein_kinase_family_protein
REFERENCE	evm.model.scaffold389_size273484.26	Serine/threonine-protein kinase fray2	EC:2.7.11	T	AT4G10730.2	Protein_kinase_superfamily_protein
REFERENCE	evm.model.scaffold389_size273484.12	putative receptor-like protein kinase At4g00960	EC:2.7.11	T	AT4G23180.3	cysteine-rich_RLK_(RECEPTOR-like_protein_kinase)_10
[truncated: 945 more rows]

## Sheet: Ugibba PROXIMAL
Tags	Annotation	FDR	P-Value	Nr Test	Nr Reference	Non Annot Test	Non Annot Reference
[truncated: 191 more rows]

[truncated: 6 more sheets: Urenif TANDEM, Ugibba TANDEM, Urenif SEGMENTAL, Ugibba SEGMENTAL, Urenif PROXIMAL+TANDEM, Ugibba PROXIMAL + TANDEM]
