# Supplementary material for: The Terrestrial Carnivorous Plant Utricularia reniformis Sheds Light on Environmental and Life-Form Genome Plasticity
Source: Int J Mol Sci. 2019 Dec 18;21(1):3. doi: 10.3390/ijms21010003 (PMC6982007; doi:10.3390/ijms21010003)
Supplement: Supplementary file 1 [file ijms-21-00003-s001.zip › Supplementary_tableS9.xls]

## Sheet: Urenif SINGLETONS
go-basic.obo: fmt(1.2) rel(2019-06-10) 47,442 GO Terms; optional_attrs(relationship)
goslim_plant.obo: fmt(1.2) rel(None) 156 GO Terms
Sections: goatools.test_data.sections.data2018_07_find_enrichment
protein
GO	NS	enrichment	p_fdr_bh	dcnt	tinfo	depth	ratio_in_study	ratio_in_pop	name	p_uncorrected	study_count	study_items
GO:0036211	BP	p	6.04e-04	1322	4.32859	5	151/1401	3912/27751	protein modification process	1.79e-04	151	evm.model.scaffold104_size664890.92, evm.model.scaffold104_size664890.93, evm.model.scaffold108_size655003.85, evm.model.scaffold117_size639039.137, evm.model.scaffold117_size639039.139, evm.model.scaffold117_size639039.146, evm.model.scaffold119_size622808.54, evm.model.scaffold11_size1489916.274, evm.model.scaffold121_size616638.109, evm.model.scaffold125_size608205.64, evm.model.scaffold128_si…
GO:0006464	BP	p	6.04e-04	1320	4.32859	6	151/1401	3912/27751	cellular protein modification process	1.79e-04	151	evm.model.scaffold104_size664890.92, evm.model.scaffold104_size664890.93, evm.model.scaffold108_size655003.85, evm.model.scaffold117_size639039.137, evm.model.scaffold117_size639039.139, evm.model.scaffold117_size639039.146, evm.model.scaffold119_size622808.54, evm.model.scaffold11_size1489916.274, evm.model.scaffold121_size616638.109, evm.model.scaffold125_size608205.64, evm.model.scaffold128_si…
GO:0044267	BP	p	2.78e-03	1726	4.12798	5	197/1401	4781/27751	cellular protein metabolic process	1.08e-03	197	evm.model.scaffold100_size686073.114, evm.model.scaffold102_size677817.49, evm.model.scaffold104_size664890.92, evm.model.scaffold104_size664890.93, evm.model.scaffold108_size655003.85, evm.model.scaffold117_size639039.137, evm.model.scaffold117_size639039.139, evm.model.scaffold117_size639039.146, evm.model.scaffold119_size622808.54, evm.model.scaffold119_size622808.6, evm.model.scaffold11_size1…
GO:0019538	BP	p	1.09e-02	2175	3.91328	4	257/1401	5926/27751	protein metabolic process	4.45e-03	257	evm.model.scaffold100_size686073.114, evm.model.scaffold102_size677817.49, evm.model.scaffold104_size664890.74, evm.model.scaffold104_size664890.92, evm.model.scaffold104_size664890.93, evm.model.scaffold105_size659173.71, evm.model.scaffold108_size655003.85, evm.model.scaffold117_size639039.137, evm.model.scaffold117_size639039.139, evm.model.scaffold117_size639039.146, evm.model.scaffold119_siz…
phosph
GO:0016772	MF	p	1.81e-05	601	4.10353	3	49/1401	2206/27751	transferase activity, transferring phosphorus-containing groups	4.68e-06	49	evm.model.scaffold10_size1516488.254, evm.model.scaffold10_size1516488.282, evm.model.scaffold10_size1516488.311, evm.model.scaffold143_size572353.16, evm.model.scaffold153_size555728.142, evm.model.scaffold180_size499775.58, evm.model.scaffold18_size1404391.105, evm.model.scaffold196_size466988.11, evm.model.scaffold215_size442783.108, evm.model.scaffold216_size441981.25, evm.model.scaffold225_s…
GO:0016301	MF	p	1.81e-05	352	4.10353	4	49/1401	2206/27751	kinase activity	4.68e-06	49	evm.model.scaffold10_size1516488.254, evm.model.scaffold10_size1516488.282, evm.model.scaffold10_size1516488.311, evm.model.scaffold143_size572353.16, evm.model.scaffold153_size555728.142, evm.model.scaffold180_size499775.58, evm.model.scaffold18_size1404391.105, evm.model.scaffold196_size466988.11, evm.model.scaffold215_size442783.108, evm.model.scaffold216_size441981.25, evm.model.scaffold225_s…
metabolic
GO:0005975	BP	p	3.90e-05	794	5.22827	3	34/1401	1591/27751	carbohydrate metabolic process	3.80e-06	34	evm.model.scaffold107_size656107.65, evm.model.scaffold110_size649966.25, evm.model.scaffold138_size578810.73, evm.model.scaffold150_size559803.104, evm.model.scaffold155_size543531.15, evm.model.scaffold169_size519396.33, evm.model.scaffold18_size1404391.105, evm.model.scaffold18_size1404391.88, evm.model.scaffold220_size437153.41, evm.model.scaffold220_size437153.77, evm.model.scaffold229_size4…
cellular_component
GO:0005783	CC	e	9.60e-03	107	5.28757	5	51/1401	676/27751	endoplasmic reticulum	4.29e-03	51	evm.model.scaffold108_size655003.85, evm.model.scaffold116_size639307.63, evm.model.scaffold121_size616638.109, evm.model.scaffold142_size574908.38, evm.model.scaffold148_size560834.42, evm.model.scaffold166_size521459.73, evm.model.scaffold16_size1429268.381, evm.model.scaffold177_size501284.137, evm.model.scaffold189_size480584.93, evm.model.scaffold18_size1404391.67, evm.model.scaffold193_size…
GO:0005739	CC	e	1.65e-02	95	5.38052	5	46/1401	616/27751	mitochondrion	8.81e-03	46	evm.model.scaffold106_size656854.171, evm.model.scaffold106_size656854.56, evm.model.scaffold11_size1489916.63, evm.model.scaffold147_size561064.35, evm.model.scaffold150_size559803.104, evm.model.scaffold154_size551747.148, evm.model.scaffold167_size520804.91, evm.model.scaffold168_size520293.108, evm.model.scaffold168_size520293.44, evm.model.scaffold182_size489013.80, evm.model.scaffold18_size…
GO:0031410	CC	e	3.12e-02	290	6.02302	5	26/1401	324/27751	cytoplasmic vesicle	2.06e-02	26	evm.model.scaffold104_size664890.85, evm.model.scaffold11_size1489916.65, evm.model.scaffold144_size572261.59, evm.model.scaffold151_size559051.46, evm.model.scaffold155_size543531.21, evm.model.scaffold257_size385841.53, evm.model.scaffold265_size376597.18, evm.model.scaffold294_size351170.85, evm.model.scaffold299_size348511.28, evm.model.scaffold342_size317645.17, evm.model.scaffold373_size281…
GO:0005768	CC	e	3.12e-02	77	6.02302	6	26/1401	324/27751	endosome	2.06e-02	26	evm.model.scaffold104_size664890.85, evm.model.scaffold11_size1489916.65, evm.model.scaffold144_size572261.59, evm.model.scaffold151_size559051.46, evm.model.scaffold155_size543531.21, evm.model.scaffold257_size385841.53, evm.model.scaffold265_size376597.18, evm.model.scaffold294_size351170.85, evm.model.scaffold299_size348511.28, evm.model.scaffold342_size317645.17, evm.model.scaffold373_size281…
GO:0005773	CC	p	3.26e-02	87	5.11168	5	27/1401	806/27751	vacuole	2.22e-02	27	evm.model.scaffold104_size664890.111, evm.model.scaffold120_size617610.103, evm.model.scaffold120_size617610.107, evm.model.scaffold134_size590630.34, evm.model.scaffold138_size578810.73, evm.model.scaffold150_size559803.104, evm.model.scaffold166_size521459.81, evm.model.scaffold188_size480585.79, evm.model.scaffold228_size428413.2, evm.model.scaffold27_size1214473.161, evm.model.scaffold283_siz…
Broad
GO	NS	enrichment	p_fdr_bh	dcnt	tinfo	depth	ratio_in_study	ratio_in_pop	name	p_uncorrected	study_count	study_items
GO:0005886	CC	p	3.32e-05	473	3.55054	2	81/1401	3840/27751	plasma membrane	4.74e-06	81	evm.model.scaffold1015_size24410.1, evm.model.scaffold105_size659173.80, evm.model.scaffold110_size649966.25, evm.model.scaffold117_size639039.119, evm.model.scaffold11_size1489916.274, evm.model.scaffold11_size1489916.65, evm.model.scaffold120_size617610.103, evm.model.scaffold120_size617610.143, evm.model.scaffold121_size616638.109, evm.model.scaffold12_size1484567.317, evm.model.scaffold143_si…
GO:0019748	BP	p	3.90e-05	578	6.28322	2	5/1401	554/27751	secondary metabolic process	1.84e-06	5	evm.model.scaffold234_size415727.98, evm.model.scaffold29_size1161289.43, evm.model.scaffold49_size979919.137, evm.model.scaffold537_size174685.22, evm.model.scaffold58_size900371.186
GO:0030312	CC	p	6.58e-05	88	5.44766	2	9/1401	576/27751	external encapsulating structure	1.82e-05	9	evm.model.scaffold102_size677817.178, evm.model.scaffold11_size1489916.274, evm.model.scaffold139_size577731.164, evm.model.scaffold18_size1404391.88, evm.model.scaffold19_size1367837.47, evm.model.scaffold424_size243908.9, evm.model.scaffold473_size210511.26, evm.model.scaffold49_size979919.137, evm.model.scaffold698_size97389.22
GO:0071704	BP	p	4.74e-04	9043	3.10344	2	602/1401	13319/27751	organic substance metabolic process	1.21e-04	602	evm.model.scaffold100_size686073.114, evm.model.scaffold100_size686073.179, evm.model.scaffold102_size677817.49, evm.model.scaffold104_size664890.109, evm.model.scaffold104_size664890.143, evm.model.scaffold104_size664890.74, evm.model.scaffold104_size664890.86, evm.model.scaffold104_size664890.92, evm.model.scaffold104_size664890.93, evm.model.scaffold105_size659173.71, evm.model.scaffold105_siz…
GO:0044238	BP	p	4.74e-04	6646	3.10344	2	602/1401	13319/27751	primary metabolic process	1.21e-04	602	evm.model.scaffold100_size686073.114, evm.model.scaffold100_size686073.179, evm.model.scaffold102_size677817.49, evm.model.scaffold104_size664890.109, evm.model.scaffold104_size664890.143, evm.model.scaffold104_size664890.74, evm.model.scaffold104_size664890.86, evm.model.scaffold104_size664890.92, evm.model.scaffold104_size664890.93, evm.model.scaffold105_size659173.71, evm.model.scaffold105_siz…
GO:0043412	BP	p	6.04e-04	1487	4.32859	4	151/1401	3912/27751	macromolecule modification	1.79e-04	151	evm.model.scaffold104_size664890.92, evm.model.scaffold104_size664890.93, evm.model.scaffold108_size655003.85, evm.model.scaffold117_size639039.137, evm.model.scaffold117_size639039.139, evm.model.scaffold117_size639039.146, evm.model.scaffold119_size622808.54, evm.model.scaffold11_size1489916.274, evm.model.scaffold121_size616638.109, evm.model.scaffold125_size608205.64, evm.model.scaffold128_si…
GO:0044464	CC	e	1.22e-03	3335	2.17867	1	828/1401	15140/27751	cell part	4.68e-04	828	evm.model.scaffold100_size686073.114, evm.model.scaffold100_size686073.155, evm.model.scaffold100_size686073.78, evm.model.scaffold1015_size24410.1, evm.model.scaffold101_size679088.151, evm.model.scaffold101_size679088.78, evm.model.scaffold102_size677817.178, evm.model.scaffold102_size677817.49, evm.model.scaffold103_size665001.157, evm.model.scaffold103_size665001.87, evm.model.scaffold104_siz…
GO:1901564	BP	p	1.09e-02	4182	3.91328	3	257/1401	5926/27751	organonitrogen compound metabolic process	4.45e-03	257	evm.model.scaffold100_size686073.114, evm.model.scaffold102_size677817.49, evm.model.scaffold104_size664890.74, evm.model.scaffold104_size664890.92, evm.model.scaffold104_size664890.93, evm.model.scaffold105_size659173.71, evm.model.scaffold108_size655003.85, evm.model.scaffold117_size639039.137, evm.model.scaffold117_size639039.139, evm.model.scaffold117_size639039.146, evm.model.scaffold119_siz…
GO:0031975	CC	e	1.65e-02	164	6.49056	2	19/1401	203/27751	envelope	9.13e-03	19	evm.model.scaffold11_size1489916.76, evm.model.scaffold275_size367480.70, evm.model.scaffold27_size1214473.131, evm.model.scaffold28_size1211183.330, evm.model.scaffold2_size1816428.314, evm.model.scaffold406_size255187.25, evm.model.scaffold408_size254463.25, evm.model.scaffold411_size250506.19, evm.model.scaffold424_size243908.20, evm.model.scaffold447_size226588.61, evm.model.scaffold477_size2…
GO:0009987	BP	p	2.60e-02	18757	2.8421	1	828/1401	17297/27751	cellular process	1.09e-02	828	evm.model.scaffold100_size686073.114, evm.model.scaffold100_size686073.179, evm.model.scaffold101_size679088.151, evm.model.scaffold102_size677817.178, evm.model.scaffold102_size677817.49, evm.model.scaffold104_size664890.109, evm.model.scaffold104_size664890.141, evm.model.scaffold104_size664890.143, evm.model.scaffold104_size664890.74, evm.model.scaffold104_size664890.82, evm.model.scaffold104_…
GO:0008152	BP	p	4.11e-02	9767	2.89987	1	782/1401	16326/27751	metabolic process	1.93e-02	782	evm.model.scaffold100_size686073.114, evm.model.scaffold100_size686073.179, evm.model.scaffold1015_size24410.1, evm.model.scaffold101_size679088.151, evm.model.scaffold102_size677817.178, evm.model.scaffold102_size677817.49, evm.model.scaffold104_size664890.109, evm.model.scaffold104_size664890.141, evm.model.scaffold104_size664890.143, evm.model.scaffold104_size664890.74, evm.model.scaffold104_s…
Misc.
GO	NS	enrichment	p_fdr_bh	dcnt	tinfo	depth	ratio_in_study	ratio_in_pop	name	p_uncorrected	study_count	study_items
GO:0003674	MF	p	1.81e-05	11075	1.72865	0	1027/1401	23714/27751	molecular_function	5.16e-06	1027	evm.model.scaffold100_size686073.155, evm.model.scaffold100_size686073.179, evm.model.scaffold1015_size24410.1, evm.model.scaffold101_size679088.151, evm.model.scaffold101_size679088.78, evm.model.scaffold102_size677817.178, evm.model.scaffold102_size677817.49, evm.model.scaffold103_size665001.157, evm.model.scaffold104_size664890.109, evm.model.scaffold104_size664890.141, evm.model.scaffold104_s…
GO:0005488	MF	p	1.81e-05	1903	2.10404	1	627/1401	16292/27751	binding	7.21e-06	627	evm.model.scaffold101_size679088.151, evm.model.scaffold102_size677817.178, evm.model.scaffold102_size677817.49, evm.model.scaffold103_size665001.157, evm.model.scaffold104_size664890.109, evm.model.scaffold104_size664890.141, evm.model.scaffold104_size664890.143, evm.model.scaffold104_size664890.74, evm.model.scaffold104_size664890.82, evm.model.scaffold104_size664890.85, evm.model.scaffold104_s…
GO:0097159	MF	p	1.81e-05	493	2.64616	2	315/1401	9474/27751	organic cyclic compound binding	7.25e-06	315	evm.model.scaffold102_size677817.178, evm.model.scaffold103_size665001.157, evm.model.scaffold104_size664890.74, evm.model.scaffold105_size659173.142, evm.model.scaffold105_size659173.54, evm.model.scaffold105_size659173.71, evm.model.scaffold105_size659173.98, evm.model.scaffold108_size655003.27, evm.model.scaffold108_size655003.28, evm.model.scaffold109_size652032.98, evm.model.scaffold10_size1…
GO:1901363	MF	p	1.81e-05	452	2.64616	2	315/1401	9474/27751	heterocyclic compound binding	7.25e-06	315	evm.model.scaffold102_size677817.178, evm.model.scaffold103_size665001.157, evm.model.scaffold104_size664890.74, evm.model.scaffold105_size659173.142, evm.model.scaffold105_size659173.54, evm.model.scaffold105_size659173.71, evm.model.scaffold105_size659173.98, evm.model.scaffold108_size655003.27, evm.model.scaffold108_size655003.28, evm.model.scaffold109_size652032.98, evm.model.scaffold10_size1…
GO:0036094	MF	p	1.81e-05	186	3.50842	2	94/1401	4000/27751	small molecule binding	4.72e-06	94	evm.model.scaffold102_size677817.178, evm.model.scaffold105_size659173.54, evm.model.scaffold108_size655003.27, evm.model.scaffold108_size655003.28, evm.model.scaffold10_size1516488.282, evm.model.scaffold114_size641222.171, evm.model.scaffold11_size1489916.165, evm.model.scaffold11_size1489916.65, evm.model.scaffold139_size577731.55, evm.model.scaffold13_size1475766.162, evm.model.scaffold13_siz…
GO:1901265	MF	p	1.81e-05	58	3.50967	3	93/1401	3995/27751	nucleoside phosphate binding	5.63e-06	93	evm.model.scaffold102_size677817.178, evm.model.scaffold105_size659173.54, evm.model.scaffold108_size655003.27, evm.model.scaffold108_size655003.28, evm.model.scaffold10_size1516488.282, evm.model.scaffold114_size641222.171, evm.model.scaffold11_size1489916.165, evm.model.scaffold11_size1489916.65, evm.model.scaffold139_size577731.55, evm.model.scaffold13_size1475766.162, evm.model.scaffold13_siz…
GO:0005215	MF	p	1.81e-05	1056	4.28332	1	45/1401	1843/27751	transporter activity	3.37e-06	45	evm.model.scaffold101_size679088.78, evm.model.scaffold105_size659173.80, evm.model.scaffold117_size639039.99, evm.model.scaffold122_size611765.133, evm.model.scaffold141_size577029.99, evm.model.scaffold154_size551747.148, evm.model.scaffold160_size534036.62, evm.model.scaffold160_size534036.63, evm.model.scaffold166_size521459.81, evm.model.scaffold167_size520804.68, evm.model.scaffold168_size5…
GO:0005515	MF	p	1.81e-05	969	2.98118	2	264/1401	6777/27751	protein binding	7.69e-06	264	evm.model.scaffold101_size679088.151, evm.model.scaffold102_size677817.178, evm.model.scaffold104_size664890.109, evm.model.scaffold104_size664890.141, evm.model.scaffold104_size664890.82, evm.model.scaffold104_size664890.85, evm.model.scaffold104_size664890.92, evm.model.scaffold104_size664890.93, evm.model.scaffold105_size659173.20, evm.model.scaffold105_size659173.98, evm.model.scaffold107_siz…
GO:0060089	MF	p	1.81e-05	413	5.77419	1	2/1401	415/27751	molecular transducer activity	2.15e-06	2	evm.model.scaffold269_size371661.66, evm.model.scaffold488_size202194.12
GO:0038023	MF	p	1.81e-05	397	5.77419	2	2/1401	415/27751	signaling receptor activity	2.15e-06	2	evm.model.scaffold269_size371661.66, evm.model.scaffold488_size202194.12
GO:0003676	MF	p	1.81e-05	328	3.08348	3	233/1401	6118/27751	nucleic acid binding	6.67e-06	233	evm.model.scaffold103_size665001.157, evm.model.scaffold104_size664890.74, evm.model.scaffold105_size659173.142, evm.model.scaffold105_size659173.71, evm.model.scaffold105_size659173.98, evm.model.scaffold108_size655003.27, evm.model.scaffold109_size652032.98, evm.model.scaffold10_size1516488.298, evm.model.scaffold10_size1516488.312, evm.model.scaffold117_size639039.137, evm.model.scaffold11_siz…
GO:0003677	MF	p	1.81e-05	146	3.75849	4	90/1401	3115/27751	DNA binding	4.86e-06	90	evm.model.scaffold104_size664890.74, evm.model.scaffold105_size659173.71, evm.model.scaffold108_size655003.27, evm.model.scaffold109_size652032.98, evm.model.scaffold117_size639039.137, evm.model.scaffold11_size1489916.143, evm.model.scaffold135_size590554.21, evm.model.scaffold143_size572353.50, evm.model.scaffold143_size572353.76, evm.model.scaffold144_size572261.136, evm.model.scaffold151_size…
GO:0000166	MF	p	1.81e-05	56	3.50967	4	93/1401	3995/27751	nucleotide binding	5.63e-06	93	evm.model.scaffold102_size677817.178, evm.model.scaffold105_size659173.54, evm.model.scaffold108_size655003.27, evm.model.scaffold108_size655003.28, evm.model.scaffold10_size1516488.282, evm.model.scaffold114_size641222.171, evm.model.scaffold11_size1489916.165, evm.model.scaffold11_size1489916.65, evm.model.scaffold139_size577731.55, evm.model.scaffold13_size1475766.162, evm.model.scaffold13_siz…
GO:0140110	MF	p	1.81e-05	29	4.05487	1	45/1401	2316/27751	transcription regulator activity	3.73e-06	45	evm.model.scaffold105_size659173.71, evm.model.scaffold11_size1489916.143, evm.model.scaffold135_size590554.21, evm.model.scaffold143_size572353.50, evm.model.scaffold143_size572353.76, evm.model.scaffold151_size559051.44, evm.model.scaffold151_size559051.49, evm.model.scaffold165_size523336.15, evm.model.scaffold201_size464543.11, evm.model.scaffold20_size1366081.50, evm.model.scaffold230_size42…
GO:0003700	MF	p	1.81e-05	8	4.15564	2	26/1401	2094/27751	DNA-binding transcription factor activity	3.51e-06	26	evm.model.scaffold135_size590554.21, evm.model.scaffold143_size572353.76, evm.model.scaffold151_size559051.44, evm.model.scaffold165_size523336.15, evm.model.scaffold201_size464543.11, evm.model.scaffold20_size1366081.50, evm.model.scaffold230_size422617.19, evm.model.scaffold243_size401479.10, evm.model.scaffold249_size395244.45, evm.model.scaffold266_size374472.76, evm.model.scaffold275_size367…
GO:0005575	CC	e	3.32e-05	4212	1.92976	0	1076/1401	19419/27751	cellular_component	7.07e-06	1076	evm.model.scaffold100_size686073.114, evm.model.scaffold100_size686073.155, evm.model.scaffold100_size686073.179, evm.model.scaffold100_size686073.78, evm.model.scaffold1015_size24410.1, evm.model.scaffold101_size679088.151, evm.model.scaffold101_size679088.78, evm.model.scaffold102_size677817.178, evm.model.scaffold102_size677817.49, evm.model.scaffold103_size665001.157, evm.model.scaffold103_si…
GO:0043226	CC	e	3.32e-05	1957	2.85726	1	514/1401	7681/27751	organelle	6.48e-06	514	evm.model.scaffold100_size686073.114, evm.model.scaffold100_size686073.155, evm.model.scaffold101_size679088.151, evm.model.scaffold101_size679088.78, evm.model.scaffold102_size677817.178, evm.model.scaffold102_size677817.49, evm.model.scaffold103_size665001.157, evm.model.scaffold103_size665001.87, evm.model.scaffold104_size664890.111, evm.model.scaffold104_size664890.141, evm.model.scaffold104_…
GO:0043229	CC	e	3.32e-05	1784	2.85726	3	514/1401	7681/27751	intracellular organelle	6.48e-06	514	evm.model.scaffold100_size686073.114, evm.model.scaffold100_size686073.155, evm.model.scaffold101_size679088.151, evm.model.scaffold101_size679088.78, evm.model.scaffold102_size677817.178, evm.model.scaffold102_size677817.49, evm.model.scaffold103_size665001.157, evm.model.scaffold103_size665001.87, evm.model.scaffold104_size664890.111, evm.model.scaffold104_size664890.141, evm.model.scaffold104_…
GO:0043227	CC	e	3.32e-05	1367	3.06199	2	442/1401	6259/27751	membrane-bounded organelle	5.80e-06	442	evm.model.scaffold100_size686073.114, evm.model.scaffold100_size686073.155, evm.model.scaffold101_size679088.151, evm.model.scaffold101_size679088.78, evm.model.scaffold102_size677817.178, evm.model.scaffold102_size677817.49, evm.model.scaffold103_size665001.157, evm.model.scaffold104_size664890.111, evm.model.scaffold104_size664890.141, evm.model.scaffold104_size664890.74, evm.model.scaffold104_…
GO:0043231	CC	e	3.32e-05	1050	3.08445	4	429/1401	6120/27751	intracellular membrane-bounded organelle	6.68e-06	429	evm.model.scaffold100_size686073.114, evm.model.scaffold100_size686073.155, evm.model.scaffold101_size679088.151, evm.model.scaffold101_size679088.78, evm.model.scaffold102_size677817.178, evm.model.scaffold102_size677817.49, evm.model.scaffold103_size665001.157, evm.model.scaffold104_size664890.111, evm.model.scaffold104_size664890.141, evm.model.scaffold104_size664890.74, evm.model.scaffold104_…
GO:0044444	CC	e	3.32e-05	1270	2.81133	3	515/1401	8042/27751	cytoplasmic part	6.54e-06	515	evm.model.scaffold100_size686073.114, evm.model.scaffold100_size686073.155, evm.model.scaffold101_size679088.151, evm.model.scaffold101_size679088.78, evm.model.scaffold102_size677817.178, evm.model.scaffold102_size677817.49, evm.model.scaffold103_size665001.157, evm.model.scaffold103_size665001.87, evm.model.scaffold104_size664890.111, evm.model.scaffold104_size664890.141, evm.model.scaffold104_…
GO:0005634	CC	e	3.32e-05	517	5.43729	5	56/1401	582/27751	nucleus	5.00e-06	56	evm.model.scaffold104_size664890.74, evm.model.scaffold104_size664890.92, evm.model.scaffold104_size664890.93, evm.model.scaffold107_size656107.97, evm.model.scaffold109_size652032.98, evm.model.scaffold118_size635519.100, evm.model.scaffold120_size617610.49, evm.model.scaffold120_size617610.80, evm.model.scaffold139_size577731.55, evm.model.scaffold139_size577731.70, evm.model.scaffold151_size55…
GO:0009536	CC	e	3.32e-05	137	3.75147	5	237/1401	3141/27751	plastid	4.24e-06	237	evm.model.scaffold100_size686073.114, evm.model.scaffold100_size686073.155, evm.model.scaffold101_size679088.151, evm.model.scaffold101_size679088.78, evm.model.scaffold102_size677817.178, evm.model.scaffold102_size677817.49, evm.model.scaffold103_size665001.157, evm.model.scaffold104_size664890.141, evm.model.scaffold105_size659173.39, evm.model.scaffold105_size659173.54, evm.model.scaffold105_s…
GO:0009507	CC	e	3.32e-05	49	3.7944	6	226/1401	3009/27751	chloroplast	5.25e-06	226	evm.model.scaffold100_size686073.114, evm.model.scaffold100_size686073.155, evm.model.scaffold101_size679088.151, evm.model.scaffold101_size679088.78, evm.model.scaffold102_size677817.178, evm.model.scaffold102_size677817.49, evm.model.scaffold103_size665001.157, evm.model.scaffold104_size664890.141, evm.model.scaffold105_size659173.39, evm.model.scaffold105_size659173.54, evm.model.scaffold105_s…
GO:0044424	CC	e	3.49e-05	2384	2.41319	2	761/1401	11975/27751	intracellular part	8.17e-06	761	evm.model.scaffold100_size686073.114, evm.model.scaffold100_size686073.155, evm.model.scaffold101_size679088.151, evm.model.scaffold101_size679088.78, evm.model.scaffold102_size677817.178, evm.model.scaffold102_size677817.49, evm.model.scaffold103_size665001.157, evm.model.scaffold103_size665001.87, evm.model.scaffold104_size664890.109, evm.model.scaffold104_size664890.111, evm.model.scaffold104_…
GO:0065007	BP	p	3.90e-05	13140	4.46241	1	112/1401	3422/27751	biological regulation	5.22e-06	112	evm.model.scaffold104_size664890.109, evm.model.scaffold104_size664890.74, evm.model.scaffold104_size664890.82, evm.model.scaffold104_size664890.92, evm.model.scaffold104_size664890.93, evm.model.scaffold105_size659173.98, evm.model.scaffold107_size656107.65, evm.model.scaffold109_size652032.98, evm.model.scaffold11_size1489916.76, evm.model.scaffold120_size617610.80, evm.model.scaffold125_size60…
GO:0050789	BP	p	3.90e-05	11820	4.67451	2	84/1401	2768/27751	regulation of biological process	4.52e-06	84	evm.model.scaffold104_size664890.109, evm.model.scaffold104_size664890.74, evm.model.scaffold104_size664890.92, evm.model.scaffold104_size664890.93, evm.model.scaffold105_size659173.98, evm.model.scaffold107_size656107.65, evm.model.scaffold109_size652032.98, evm.model.scaffold11_size1489916.76, evm.model.scaffold120_size617610.80, evm.model.scaffold125_size608205.35, evm.model.scaffold13_size147…
GO:0050794	BP	p	3.90e-05	8358	4.78438	3	67/1401	2480/27751	regulation of cellular process	3.66e-06	67	evm.model.scaffold104_size664890.109, evm.model.scaffold104_size664890.74, evm.model.scaffold104_size664890.92, evm.model.scaffold104_size664890.93, evm.model.scaffold107_size656107.65, evm.model.scaffold11_size1489916.76, evm.model.scaffold125_size608205.35, evm.model.scaffold13_size1475766.162, evm.model.scaffold143_size572353.50, evm.model.scaffold143_size572353.76, evm.model.scaffold152_size5…
GO:0032501	BP	p	3.90e-05	7576	4.39217	1	124/1401	3671/27751	multicellular organismal process	5.57e-06	124	evm.model.scaffold101_size679088.151, evm.model.scaffold104_size664890.74, evm.model.scaffold105_size659173.98, evm.model.scaffold108_size655003.27, evm.model.scaffold109_size652032.98, evm.model.scaffold10_size1516488.282, evm.model.scaffold11_size1489916.274, evm.model.scaffold120_size617610.103, evm.model.scaffold120_size617610.143, evm.model.scaffold128_size606351.45, evm.model.scaffold12_siz…
GO:0032502	BP	p	3.90e-05	6491	4.38295	1	110/1401	3705/27751	developmental process	4.98e-06	110	evm.model.scaffold104_size664890.74, evm.model.scaffold105_size659173.98, evm.model.scaffold109_size652032.98, evm.model.scaffold10_size1516488.282, evm.model.scaffold120_size617610.103, evm.model.scaffold120_size617610.107, evm.model.scaffold134_size590630.46, evm.model.scaffold138_size578810.73, evm.model.scaffold13_size1475766.163, evm.model.scaffold141_size577029.99, evm.model.scaffold145_siz…
GO:0048869	BP	p	3.90e-05	2573	5.51532	2	21/1401	1194/27751	cellular developmental process	2.65e-06	21	evm.model.scaffold105_size659173.98, evm.model.scaffold145_size568489.142, evm.model.scaffold21_size1333958.351, evm.model.scaffold230_size422617.19, evm.model.scaffold231_size422325.85, evm.model.scaffold275_size367480.63, evm.model.scaffold275_size367480.70, evm.model.scaffold317_size334483.56, evm.model.scaffold335_size320703.17, evm.model.scaffold375_size279719.34, evm.model.scaffold473_size2…
GO:0048856	BP	p	3.90e-05	6082	4.50327	2	107/1401	3285/27751	anatomical structure development	5.30e-06	107	evm.model.scaffold104_size664890.74, evm.model.scaffold105_size659173.98, evm.model.scaffold109_size652032.98, evm.model.scaffold10_size1516488.282, evm.model.scaffold120_size617610.103, evm.model.scaffold120_size617610.107, evm.model.scaffold134_size590630.46, evm.model.scaffold138_size578810.73, evm.model.scaffold13_size1475766.163, evm.model.scaffold141_size577029.99, evm.model.scaffold145_siz…
GO:0042221	BP	p	3.90e-05	2467	4.1705	2	138/1401	4582/27751	response to chemical	5.35e-06	138	evm.model.scaffold102_size677817.178, evm.model.scaffold104_size664890.111, evm.model.scaffold104_size664890.74, evm.model.scaffold107_size656107.65, evm.model.scaffold117_size639039.119, evm.model.scaffold117_size639039.137, evm.model.scaffold11_size1489916.274, evm.model.scaffold11_size1489916.63, evm.model.scaffold11_size1489916.76, evm.model.scaffold120_size617610.143, evm.model.scaffold122_s…
GO:0030154	BP	p	3.90e-05	2428	5.51532	3	21/1401	1194/27751	cell differentiation	2.65e-06	21	evm.model.scaffold105_size659173.98, evm.model.scaffold145_size568489.142, evm.model.scaffold21_size1333958.351, evm.model.scaffold230_size422617.19, evm.model.scaffold231_size422325.85, evm.model.scaffold275_size367480.63, evm.model.scaffold275_size367480.70, evm.model.scaffold317_size334483.56, evm.model.scaffold335_size320703.17, evm.model.scaffold375_size279719.34, evm.model.scaffold473_size2…
GO:0007165	BP	p	3.90e-05	1750	4.78438	4	67/1401	2480/27751	signal transduction	3.66e-06	67	evm.model.scaffold104_size664890.109, evm.model.scaffold104_size664890.74, evm.model.scaffold104_size664890.92, evm.model.scaffold104_size664890.93, evm.model.scaffold107_size656107.65, evm.model.scaffold11_size1489916.76, evm.model.scaffold125_size608205.35, evm.model.scaffold13_size1475766.162, evm.model.scaffold143_size572353.50, evm.model.scaffold143_size572353.76, evm.model.scaffold152_size5…
GO:0009719	BP	p	3.90e-05	564	4.71544	2	68/1401	2657/27751	response to endogenous stimulus	4.64e-06	68	evm.model.scaffold104_size664890.111, evm.model.scaffold104_size664890.74, evm.model.scaffold107_size656107.65, evm.model.scaffold11_size1489916.274, evm.model.scaffold11_size1489916.76, evm.model.scaffold120_size617610.143, evm.model.scaffold122_size611765.74, evm.model.scaffold13_size1475766.162, evm.model.scaffold143_size572353.76, evm.model.scaffold145_size568489.142, evm.model.scaffold147_si…
GO:0016049	BP	p	3.90e-05	118	5.92079	2	13/1401	796/27751	cell growth	2.18e-06	13	evm.model.scaffold109_size652032.98, evm.model.scaffold120_size617610.107, evm.model.scaffold145_size568489.142, evm.model.scaffold16_size1429268.381, evm.model.scaffold18_size1404391.66, evm.model.scaffold354_size300507.25, evm.model.scaffold473_size210511.26, evm.model.scaffold47_size1002735.146, evm.model.scaffold48_size992202.196, evm.model.scaffold502_size196668.12, evm.model.scaffold525_siz…
GO:0008150	BP	p	4.32e-05	29700	2.61238	0	1021/1401	21764/27751	biological_process	6.62e-06	1021	evm.model.scaffold100_size686073.114, evm.model.scaffold100_size686073.179, evm.model.scaffold1015_size24410.1, evm.model.scaffold101_size679088.151, evm.model.scaffold101_size679088.78, evm.model.scaffold102_size677817.178, evm.model.scaffold102_size677817.49, evm.model.scaffold103_size665001.127, evm.model.scaffold104_size664890.109, evm.model.scaffold104_size664890.111, evm.model.scaffold104_s…
GO:0050896	BP	p	4.46e-05	5954	3.6804	1	277/1401	7480/27751	response to stimulus	7.28e-06	277	evm.model.scaffold102_size677817.178, evm.model.scaffold104_size664890.109, evm.model.scaffold104_size664890.111, evm.model.scaffold104_size664890.74, evm.model.scaffold104_size664890.92, evm.model.scaffold104_size664890.93, evm.model.scaffold105_size659173.54, evm.model.scaffold107_size656107.65, evm.model.scaffold107_size656107.97, evm.model.scaffold108_size655003.27, evm.model.scaffold109_size…
GO:0009628	BP	p	5.82e-05	393	4.52077	2	111/1401	3228/27751	response to abiotic stimulus	1.01e-05	111	evm.model.scaffold104_size664890.109, evm.model.scaffold104_size664890.111, evm.model.scaffold104_size664890.92, evm.model.scaffold104_size664890.93, evm.model.scaffold107_size656107.65, evm.model.scaffold108_size655003.27, evm.model.scaffold109_size652032.98, evm.model.scaffold117_size639039.119, evm.model.scaffold117_size639039.99, evm.model.scaffold11_size1489916.200, evm.model.scaffold128_siz…
GO:0005618	CC	p	6.58e-05	45	5.45463	3	9/1401	572/27751	cell wall	1.77e-05	9	evm.model.scaffold102_size677817.178, evm.model.scaffold11_size1489916.274, evm.model.scaffold139_size577731.164, evm.model.scaffold18_size1404391.88, evm.model.scaffold19_size1367837.47, evm.model.scaffold424_size243908.9, evm.model.scaffold473_size210511.26, evm.model.scaffold49_size979919.137, evm.model.scaffold698_size97389.22
GO:0040007	BP	p	7.45e-05	432	5.6129	1	26/1401	1083/27751	growth	1.37e-05	26	evm.model.scaffold103_size665001.127, evm.model.scaffold109_size652032.98, evm.model.scaffold120_size617610.107, evm.model.scaffold145_size568489.142, evm.model.scaffold16_size1429268.381, evm.model.scaffold18_size1404391.66, evm.model.scaffold234_size415727.52, evm.model.scaffold275_size367480.33, evm.model.scaffold340_size317973.18, evm.model.scaffold354_size300507.25, evm.model.scaffold375_siz…
GO:0009791	BP	p	9.20e-05	381	4.8344	2	77/1401	2359/27751	post-embryonic development	1.78e-05	77	evm.model.scaffold101_size679088.151, evm.model.scaffold105_size659173.98, evm.model.scaffold108_size655003.27, evm.model.scaffold109_size652032.98, evm.model.scaffold10_size1516488.282, evm.model.scaffold11_size1489916.274, evm.model.scaffold120_size617610.143, evm.model.scaffold128_size606351.45, evm.model.scaffold12_size1484567.105, evm.model.scaffold134_size590630.46, evm.model.scaffold13_siz…
GO:0022414	BP	p	1.83e-04	1244	5.64384	1	26/1401	1050/27751	reproductive process	3.74e-05	26	evm.model.scaffold105_size659173.98, evm.model.scaffold109_size652032.98, evm.model.scaffold154_size551747.41, evm.model.scaffold155_size543531.53, evm.model.scaffold182_size489013.84, evm.model.scaffold19_size1367837.64, evm.model.scaffold230_size422617.19, evm.model.scaffold234_size415727.52, evm.model.scaffold243_size401479.10, evm.model.scaffold248_size396238.70, evm.model.scaffold293_size352…
GO:0003824	MF	p	2.72e-04	7519	2.24925	1	641/1401	14090/27751	catalytic activity	1.22e-04	641	evm.model.scaffold100_size686073.155, evm.model.scaffold100_size686073.179, evm.model.scaffold1015_size24410.1, evm.model.scaffold102_size677817.178, evm.model.scaffold104_size664890.109, evm.model.scaffold104_size664890.141, evm.model.scaffold104_size664890.143, evm.model.scaffold104_size664890.86, evm.model.scaffold104_size664890.92, evm.model.scaffold104_size664890.93, evm.model.scaffold105_si…
GO:0009605	BP	p	2.83e-04	1564	4.92717	2	71/1401	2150/27751	response to external stimulus	6.06e-05	71	evm.model.scaffold104_size664890.111, evm.model.scaffold105_size659173.54, evm.model.scaffold107_size656107.65, evm.model.scaffold117_size639039.119, evm.model.scaffold117_size639039.137, evm.model.scaffold117_size639039.99, evm.model.scaffold139_size577731.55, evm.model.scaffold143_size572353.50, evm.model.scaffold154_size551747.41, evm.model.scaffold167_size520804.41, evm.model.scaffold16_size1…
GO:0009607	BP	p	2.84e-04	859	5.27854	2	45/1401	1513/27751	response to biotic stimulus	6.37e-05	45	evm.model.scaffold107_size656107.65, evm.model.scaffold117_size639039.119, evm.model.scaffold154_size551747.41, evm.model.scaffold167_size520804.41, evm.model.scaffold16_size1429268.213, evm.model.scaffold187_size480904.105, evm.model.scaffold18_size1404391.70, evm.model.scaffold192_size479242.5, evm.model.scaffold196_size466988.11, evm.model.scaffold201_size464543.11, evm.model.scaffold230_size4…
GO:0006950	BP	p	3.96e-04	1602	4.18745	2	176/1401	4505/27751	response to stress	9.30e-05	176	evm.model.scaffold104_size664890.109, evm.model.scaffold104_size664890.92, evm.model.scaffold104_size664890.93, evm.model.scaffold105_size659173.54, evm.model.scaffold107_size656107.65, evm.model.scaffold107_size656107.97, evm.model.scaffold109_size652032.98, evm.model.scaffold114_size641222.171, evm.model.scaffold117_size639039.119, evm.model.scaffold11_size1489916.165, evm.model.scaffold11_size…
GO:0005654	CC	e	4.31e-04	122	4.88606	5	79/1401	1010/27751	nucleoplasm	1.28e-04	79	evm.model.scaffold104_size664890.109, evm.model.scaffold105_size659173.71, evm.model.scaffold105_size659173.98, evm.model.scaffold107_size656107.65, evm.model.scaffold10_size1516488.282, evm.model.scaffold117_size639039.137, evm.model.scaffold117_size639039.146, evm.model.scaffold135_size590554.154, evm.model.scaffold144_size572261.57, evm.model.scaffold151_size559051.44, evm.model.scaffold151_si…
GO:0003006	BP	p	6.04e-04	733	5.98835	2	17/1401	744/27751	developmental process involved in reproduction	1.71e-04	17	evm.model.scaffold105_size659173.98, evm.model.scaffold109_size652032.98, evm.model.scaffold155_size543531.53, evm.model.scaffold182_size489013.84, evm.model.scaffold230_size422617.19, evm.model.scaffold234_size415727.52, evm.model.scaffold243_size401479.10, evm.model.scaffold35_size1080921.135, evm.model.scaffold372_size281874.52, evm.model.scaffold375_size279719.34, evm.model.scaffold395_size26…
GO:0044422	CC	e	6.30e-04	1634	4.27651	1	129/1401	1858/27751	organelle part	2.28e-04	129	evm.model.scaffold104_size664890.109, evm.model.scaffold105_size659173.71, evm.model.scaffold105_size659173.98, evm.model.scaffold107_size656107.65, evm.model.scaffold10_size1516488.282, evm.model.scaffold117_size639039.137, evm.model.scaffold117_size639039.146, evm.model.scaffold11_size1489916.76, evm.model.scaffold122_size611765.134, evm.model.scaffold135_size590554.154, evm.model.scaffold143_s…
GO:0044446	CC	e	6.30e-04	1473	4.27651	3	129/1401	1858/27751	intracellular organelle part	2.28e-04	129	evm.model.scaffold104_size664890.109, evm.model.scaffold105_size659173.71, evm.model.scaffold105_size659173.98, evm.model.scaffold107_size656107.65, evm.model.scaffold10_size1516488.282, evm.model.scaffold117_size639039.137, evm.model.scaffold117_size639039.146, evm.model.scaffold11_size1489916.76, evm.model.scaffold122_size611765.134, evm.model.scaffold135_size590554.154, evm.model.scaffold143_s…
GO:0044428	CC	e	6.30e-04	496	4.27651	4	129/1401	1858/27751	nuclear part	2.28e-04	129	evm.model.scaffold104_size664890.109, evm.model.scaffold105_size659173.71, evm.model.scaffold105_size659173.98, evm.model.scaffold107_size656107.65, evm.model.scaffold10_size1516488.282, evm.model.scaffold117_size639039.137, evm.model.scaffold117_size639039.146, evm.model.scaffold11_size1489916.76, evm.model.scaffold122_size611765.134, evm.model.scaffold135_size590554.154, evm.model.scaffold143_s…
GO:0048731	BP	p	6.39e-04	4540	5.99916	3	17/1401	736/27751	system development	2.22e-04	17	evm.model.scaffold105_size659173.98, evm.model.scaffold109_size652032.98, evm.model.scaffold155_size543531.53, evm.model.scaffold182_size489013.84, evm.model.scaffold230_size422617.19, evm.model.scaffold234_size415727.52, evm.model.scaffold243_size401479.10, evm.model.scaffold35_size1080921.135, evm.model.scaffold372_size281874.52, evm.model.scaffold375_size279719.34, evm.model.scaffold395_size26…
GO:0048367	BP	p	6.39e-04	146	5.99916	4	17/1401	736/27751	shoot system development	2.22e-04	17	evm.model.scaffold105_size659173.98, evm.model.scaffold109_size652032.98, evm.model.scaffold155_size543531.53, evm.model.scaffold182_size489013.84, evm.model.scaffold230_size422617.19, evm.model.scaffold234_size415727.52, evm.model.scaffold243_size401479.10, evm.model.scaffold35_size1080921.135, evm.model.scaffold372_size281874.52, evm.model.scaffold375_size279719.34, evm.model.scaffold395_size26…
GO:0048608	BP	p	6.39e-04	413	5.99916	3	17/1401	736/27751	reproductive structure development	2.22e-04	17	evm.model.scaffold105_size659173.98, evm.model.scaffold109_size652032.98, evm.model.scaffold155_size543531.53, evm.model.scaffold182_size489013.84, evm.model.scaffold230_size422617.19, evm.model.scaffold234_size415727.52, evm.model.scaffold243_size401479.10, evm.model.scaffold35_size1080921.135, evm.model.scaffold372_size281874.52, evm.model.scaffold375_size279719.34, evm.model.scaffold395_size26…
GO:0090567	BP	p	6.39e-04	95	5.99916	5	17/1401	736/27751	reproductive shoot system development	2.22e-04	17	evm.model.scaffold105_size659173.98, evm.model.scaffold109_size652032.98, evm.model.scaffold155_size543531.53, evm.model.scaffold182_size489013.84, evm.model.scaffold230_size422617.19, evm.model.scaffold234_size415727.52, evm.model.scaffold243_size401479.10, evm.model.scaffold35_size1080921.135, evm.model.scaffold372_size281874.52, evm.model.scaffold375_size279719.34, evm.model.scaffold395_size26…
GO:0009908	BP	p	6.39e-04	88	5.99916	6	17/1401	736/27751	flower development	2.22e-04	17	evm.model.scaffold105_size659173.98, evm.model.scaffold109_size652032.98, evm.model.scaffold155_size543531.53, evm.model.scaffold182_size489013.84, evm.model.scaffold230_size422617.19, evm.model.scaffold234_size415727.52, evm.model.scaffold243_size401479.10, evm.model.scaffold35_size1080921.135, evm.model.scaffold372_size281874.52, evm.model.scaffold375_size279719.34, evm.model.scaffold395_size26…
GO:0090304	BP	e	7.59e-04	1714	5.61567	5	82/1401	1080/27751	nucleic acid metabolic process	2.79e-04	82	evm.model.scaffold104_size664890.109, evm.model.scaffold104_size664890.143, evm.model.scaffold104_size664890.92, evm.model.scaffold104_size664890.93, evm.model.scaffold107_size656107.97, evm.model.scaffold114_size641222.171, evm.model.scaffold120_size617610.93, evm.model.scaffold135_size590554.154, evm.model.scaffold143_size572353.50, evm.model.scaffold148_size560834.62, evm.model.scaffold151_siz…
GO:0006259	BP	e	7.59e-04	519	5.61567	6	82/1401	1080/27751	DNA metabolic process	2.79e-04	82	evm.model.scaffold104_size664890.109, evm.model.scaffold104_size664890.143, evm.model.scaffold104_size664890.92, evm.model.scaffold104_size664890.93, evm.model.scaffold107_size656107.97, evm.model.scaffold114_size641222.171, evm.model.scaffold120_size617610.93, evm.model.scaffold135_size590554.154, evm.model.scaffold143_size572353.50, evm.model.scaffold148_size560834.62, evm.model.scaffold151_siz…
GO:0015979	BP	e	1.24e-03	38	6.97637	3	28/1401	277/27751	photosynthesis	4.68e-04	28	evm.model.scaffold101_size679088.151, evm.model.scaffold104_size664890.141, evm.model.scaffold122_size611765.74, evm.model.scaffold131_size602077.68, evm.model.scaffold132_size599623.44, evm.model.scaffold144_size572261.144, evm.model.scaffold155_size543531.49, evm.model.scaffold21_size1333958.350, evm.model.scaffold240_size406237.33, evm.model.scaffold243_size401479.61, evm.model.scaffold285_siz…
GO:0016787	MF	p	1.56e-03	1490	3.18997	2	229/1401	5500/27751	hydrolase activity	7.43e-04	229	evm.model.scaffold104_size664890.109, evm.model.scaffold104_size664890.143, evm.model.scaffold104_size664890.86, evm.model.scaffold104_size664890.92, evm.model.scaffold104_size664890.93, evm.model.scaffold105_size659173.142, evm.model.scaffold105_size659173.71, evm.model.scaffold108_size655003.27, evm.model.scaffold108_size655003.85, evm.model.scaffold109_size652032.98, evm.model.scaffold110_size…
GO:0009579	CC	e	3.64e-03	62	5.26563	3	54/1401	691/27751	thylakoid	1.47e-03	54	evm.model.scaffold101_size679088.151, evm.model.scaffold102_size677817.49, evm.model.scaffold104_size664890.141, evm.model.scaffold112_size645884.50, evm.model.scaffold122_size611765.74, evm.model.scaffold132_size599623.44, evm.model.scaffold141_size577029.36, evm.model.scaffold141_size577029.99, evm.model.scaffold144_size572261.144, evm.model.scaffold146_size566370.56, evm.model.scaffold160_size…
GO:0005576	CC	p	5.38e-03	181	5.5461	1	12/1401	522/27751	extracellular region	2.29e-03	12	evm.model.scaffold11_size1489916.68, evm.model.scaffold27_size1214473.184, evm.model.scaffold28_size1211183.135, evm.model.scaffold315_size338688.58, evm.model.scaffold326_size324086.30, evm.model.scaffold336_size320595.65, evm.model.scaffold363_size289583.70, evm.model.scaffold400_size262257.36, evm.model.scaffold457_size221634.21, evm.model.scaffold59_size887255.40, evm.model.scaffold80_size769…
GO:0030246	MF	p	9.53e-03	47	5.92194	2	7/1401	358/27751	carbohydrate binding	4.76e-03	7	evm.model.scaffold169_size519396.42, evm.model.scaffold244_size401050.25, evm.model.scaffold261_size381946.97, evm.model.scaffold266_size374472.52, evm.model.scaffold269_size371661.66, evm.model.scaffold70_size835982.141, evm.model.scaffold82_size768308.63
GO:0005622	CC	p	1.65e-02	2386	4.9452	2	31/1401	952/27751	intracellular	8.25e-03	31	evm.model.scaffold100_size686073.78, evm.model.scaffold105_size659173.142, evm.model.scaffold122_size611765.133, evm.model.scaffold128_size606351.45, evm.model.scaffold141_size577029.44, evm.model.scaffold155_size543531.48, evm.model.scaffold156_size543371.26, evm.model.scaffold160_size534036.49, evm.model.scaffold161_size531985.14, evm.model.scaffold201_size464543.103, evm.model.scaffold245_size…
GO:0031967	CC	e	1.65e-02	137	6.49056	4	19/1401	203/27751	organelle envelope	9.13e-03	19	evm.model.scaffold11_size1489916.76, evm.model.scaffold275_size367480.70, evm.model.scaffold27_size1214473.131, evm.model.scaffold28_size1211183.330, evm.model.scaffold2_size1816428.314, evm.model.scaffold406_size255187.25, evm.model.scaffold408_size254463.25, evm.model.scaffold411_size250506.19, evm.model.scaffold424_size243908.20, evm.model.scaffold447_size226588.61, evm.model.scaffold477_size2…
GO:0005635	CC	e	1.65e-02	30	6.49056	5	19/1401	203/27751	nuclear envelope	9.13e-03	19	evm.model.scaffold11_size1489916.76, evm.model.scaffold275_size367480.70, evm.model.scaffold27_size1214473.131, evm.model.scaffold28_size1211183.330, evm.model.scaffold2_size1816428.314, evm.model.scaffold406_size255187.25, evm.model.scaffold408_size254463.25, evm.model.scaffold411_size250506.19, evm.model.scaffold424_size243908.20, evm.model.scaffold447_size226588.61, evm.model.scaffold477_size2…
GO:0005794	CC	p	2.27e-02	45	5.133	5	25/1401	789/27751	Golgi apparatus	1.30e-02	25	evm.model.scaffold108_size655003.85, evm.model.scaffold120_size617610.103, evm.model.scaffold127_size606493.151, evm.model.scaffold151_size559051.46, evm.model.scaffold16_size1429268.3, evm.model.scaffold18_size1404391.88, evm.model.scaffold21_size1333958.338, evm.model.scaffold238_size410540.85, evm.model.scaffold261_size381946.97, evm.model.scaffold299_size348511.28, evm.model.scaffold335_size3…
GO:0031982	CC	e	3.12e-02	306	6.02302	3	26/1401	324/27751	vesicle	2.06e-02	26	evm.model.scaffold104_size664890.85, evm.model.scaffold11_size1489916.65, evm.model.scaffold144_size572261.59, evm.model.scaffold151_size559051.46, evm.model.scaffold155_size543531.21, evm.model.scaffold257_size385841.53, evm.model.scaffold265_size376597.18, evm.model.scaffold294_size351170.85, evm.model.scaffold299_size348511.28, evm.model.scaffold342_size317645.17, evm.model.scaffold373_size281…
GO:0097708	CC	e	3.12e-02	293	6.02302	4	26/1401	324/27751	intracellular vesicle	2.06e-02	26	evm.model.scaffold104_size664890.85, evm.model.scaffold11_size1489916.65, evm.model.scaffold144_size572261.59, evm.model.scaffold151_size559051.46, evm.model.scaffold155_size543531.21, evm.model.scaffold257_size385841.53, evm.model.scaffold265_size376597.18, evm.model.scaffold294_size351170.85, evm.model.scaffold299_size348511.28, evm.model.scaffold342_size317645.17, evm.model.scaffold373_size281…
GO:0051179	BP	p	3.40e-02	4383	4.34456	1	164/1401	3850/27751	localization	1.55e-02	164	evm.model.scaffold101_size679088.78, evm.model.scaffold104_size664890.111, evm.model.scaffold104_size664890.74, evm.model.scaffold104_size664890.85, evm.model.scaffold105_size659173.80, evm.model.scaffold117_size639039.99, evm.model.scaffold11_size1489916.356, evm.model.scaffold11_size1489916.65, evm.model.scaffold11_size1489916.76, evm.model.scaffold120_size617610.103, evm.model.scaffold122_size…
GO:0051234	BP	p	3.40e-02	3139	4.34456	2	164/1401	3850/27751	establishment of localization	1.55e-02	164	evm.model.scaffold101_size679088.78, evm.model.scaffold104_size664890.111, evm.model.scaffold104_size664890.74, evm.model.scaffold104_size664890.85, evm.model.scaffold105_size659173.80, evm.model.scaffold117_size639039.99, evm.model.scaffold11_size1489916.356, evm.model.scaffold11_size1489916.65, evm.model.scaffold11_size1489916.76, evm.model.scaffold120_size617610.103, evm.model.scaffold122_size…
GO:0006810	BP	p	3.40e-02	3012	4.34456	3	164/1401	3850/27751	transport	1.55e-02	164	evm.model.scaffold101_size679088.78, evm.model.scaffold104_size664890.111, evm.model.scaffold104_size664890.74, evm.model.scaffold104_size664890.85, evm.model.scaffold105_size659173.80, evm.model.scaffold117_size639039.99, evm.model.scaffold11_size1489916.356, evm.model.scaffold11_size1489916.65, evm.model.scaffold11_size1489916.76, evm.model.scaffold120_size617610.103, evm.model.scaffold122_size…
GO:0006091	BP	e	3.40e-02	225	6.09162	3	48/1401	671/27751	generation of precursor metabolites and energy	1.56e-02	48	evm.model.scaffold101_size679088.151, evm.model.scaffold106_size656854.171, evm.model.scaffold106_size656854.56, evm.model.scaffold122_size611765.74, evm.model.scaffold125_size608205.64, evm.model.scaffold131_size602077.68, evm.model.scaffold132_size599623.44, evm.model.scaffold138_size578810.73, evm.model.scaffold143_size572353.50, evm.model.scaffold144_size572261.144, evm.model.scaffold147_size…

## Sheet: Ugibba SINGLETONS
go-basic.obo: fmt(1.2) rel(2019-06-10) 47,442 GO Terms; optional_attrs(relationship)
goslim_plant.obo: fmt(1.2) rel(None) 156 GO Terms
Sections: goatools.test_data.sections.data2018_07_find_enrichment
protein
GO	NS	enrichment	p_fdr_bh	dcnt	tinfo	depth	ratio_in_study	ratio_in_pop	name	p_uncorrected	study_count	study_items
GO:0036211	BP	p	4.36e-05	1322	4.3457	5	273/2488	2446/17760	protein modification process	1.69e-05	273	evm.model.Ug_unitig_0.1, evm.model.Ug_unitig_0.1093, evm.model.Ug_unitig_0.119, evm.model.Ug_unitig_0.1287, evm.model.Ug_unitig_0.140, evm.model.Ug_unitig_0.141, evm.model.Ug_unitig_0.1494, evm.model.Ug_unitig_0.179, evm.model.Ug_unitig_0.1821, evm.model.Ug_unitig_0.1926, evm.model.Ug_unitig_0.1955, evm.model.Ug_unitig_0.2059, evm.model.Ug_unitig_0.207, evm.model.Ug_unitig_0.2143, evm.model.Ug_un…
GO:0006464	BP	p	4.36e-05	1320	4.3457	6	273/2488	2446/17760	cellular protein modification process	1.69e-05	273	evm.model.Ug_unitig_0.1, evm.model.Ug_unitig_0.1093, evm.model.Ug_unitig_0.119, evm.model.Ug_unitig_0.1287, evm.model.Ug_unitig_0.140, evm.model.Ug_unitig_0.141, evm.model.Ug_unitig_0.1494, evm.model.Ug_unitig_0.179, evm.model.Ug_unitig_0.1821, evm.model.Ug_unitig_0.1926, evm.model.Ug_unitig_0.1955, evm.model.Ug_unitig_0.2059, evm.model.Ug_unitig_0.207, evm.model.Ug_unitig_0.2143, evm.model.Ug_un…
GO:0044267	BP	p	4.32e-04	1726	4.14756	5	354/2488	2982/17760	cellular protein metabolic process	1.90e-04	354	evm.model.Ug_unitig_0.1, evm.model.Ug_unitig_0.1093, evm.model.Ug_unitig_0.119, evm.model.Ug_unitig_0.1216, evm.model.Ug_unitig_0.1252, evm.model.Ug_unitig_0.1260, evm.model.Ug_unitig_0.1287, evm.model.Ug_unitig_0.140, evm.model.Ug_unitig_0.141, evm.model.Ug_unitig_0.1478, evm.model.Ug_unitig_0.1494, evm.model.Ug_unitig_0.179, evm.model.Ug_unitig_0.1821, evm.model.Ug_unitig_0.1898, evm.model.Ug_u…
GO:0019538	BP	p	2.29e-02	2175	3.93752	4	469/2488	3679/17760	protein metabolic process	1.31e-02	469	evm.model.Ug_unitig_0.1, evm.model.Ug_unitig_0.1063, evm.model.Ug_unitig_0.1093, evm.model.Ug_unitig_0.119, evm.model.Ug_unitig_0.1216, evm.model.Ug_unitig_0.1252, evm.model.Ug_unitig_0.1260, evm.model.Ug_unitig_0.1287, evm.model.Ug_unitig_0.1355, evm.model.Ug_unitig_0.1396, evm.model.Ug_unitig_0.140, evm.model.Ug_unitig_0.141, evm.model.Ug_unitig_0.1478, evm.model.Ug_unitig_0.1494, evm.model.Ug_…
phosph
GO:0016772	MF	p	2.29e-05	601	4.14324	3	102/2488	1341/17760	transferase activity, transferring phosphorus-containing groups	5.35e-06	102	evm.model.Ug_unitig_0.1, evm.model.Ug_unitig_0.1026, evm.model.Ug_unitig_0.1041, evm.model.Ug_unitig_0.119, evm.model.Ug_unitig_0.1327, evm.model.Ug_unitig_0.1457, evm.model.Ug_unitig_0.1718, evm.model.Ug_unitig_0.2088, evm.model.Ug_unitig_0.2337, evm.model.Ug_unitig_0.552, evm.model.Ug_unitig_0.597, evm.model.Ug_unitig_0.600, evm.model.Ug_unitig_0.661, evm.model.Ug_unitig_0.662, evm.model.Ug_uni…
GO:0016301	MF	p	2.29e-05	352	4.14324	4	102/2488	1341/17760	kinase activity	5.35e-06	102	evm.model.Ug_unitig_0.1, evm.model.Ug_unitig_0.1026, evm.model.Ug_unitig_0.1041, evm.model.Ug_unitig_0.119, evm.model.Ug_unitig_0.1327, evm.model.Ug_unitig_0.1457, evm.model.Ug_unitig_0.1718, evm.model.Ug_unitig_0.2088, evm.model.Ug_unitig_0.2337, evm.model.Ug_unitig_0.552, evm.model.Ug_unitig_0.597, evm.model.Ug_unitig_0.600, evm.model.Ug_unitig_0.661, evm.model.Ug_unitig_0.662, evm.model.Ug_uni…
metabolic
GO:0005975	BP	p	2.62e-05	794	5.24819	3	71/2488	992/17760	carbohydrate metabolic process	4.63e-06	71	evm.model.Ug_unitig_0.1139, evm.model.Ug_unitig_0.1457, evm.model.Ug_unitig_21.274, evm.model.Ug_unitig_21.525, evm.model.Ug_unitig_21.805, evm.model.Ug_unitig_21.892, evm.model.Ug_unitig_22.101, evm.model.Ug_unitig_22.1119, evm.model.Ug_unitig_22.1120, evm.model.Ug_unitig_22.1206, evm.model.Ug_unitig_22.1481, evm.model.Ug_unitig_22.1487, evm.model.Ug_unitig_22.489, evm.model.Ug_unitig_22.673, ev…
cellular_component
GO:0005773	CC	p	2.40e-05	87	5.12966	5	37/2488	505/17760	vacuole	6.37e-06	37	evm.model.Ug_unitig_0.1355, evm.model.Ug_unitig_0.396, evm.model.Ug_unitig_0.817, evm.model.Ug_unitig_21.17, evm.model.Ug_unitig_22.1186, evm.model.Ug_unitig_22.1313, evm.model.Ug_unitig_22.181, evm.model.Ug_unitig_26.1023, evm.model.Ug_unitig_26.269, evm.model.Ug_unitig_26.350, evm.model.Ug_unitig_26.374, evm.model.Ug_unitig_27.540, evm.model.Ug_unitig_32.957, evm.model.Ug_unitig_37.150, evm.mod…
GO:0005739	CC	e	1.08e-04	95	5.35034	5	86/2488	405/17760	mitochondrion	6.18e-05	86	evm.model.Ug_unitig_0.1071, evm.model.Ug_unitig_0.1157, evm.model.Ug_unitig_0.1260, evm.model.Ug_unitig_0.2139, evm.model.Ug_unitig_0.2191, evm.model.Ug_unitig_0.2430, evm.model.Ug_unitig_0.2499, evm.model.Ug_unitig_0.311, evm.model.Ug_unitig_0.345, evm.model.Ug_unitig_0.383, evm.model.Ug_unitig_0.603, evm.model.Ug_unitig_0.607, evm.model.Ug_unitig_21.229, evm.model.Ug_unitig_21.373, evm.model.Ug…
GO:0005783	CC	e	9.18e-04	107	5.27658	5	87/2488	436/17760	endoplasmic reticulum	5.86e-04	87	evm.model.Ug_unitig_0.1091, evm.model.Ug_unitig_0.1093, evm.model.Ug_unitig_0.1355, evm.model.Ug_unitig_0.1813, evm.model.Ug_unitig_0.1821, evm.model.Ug_unitig_0.2023, evm.model.Ug_unitig_0.213, evm.model.Ug_unitig_0.343, evm.model.Ug_unitig_0.454, evm.model.Ug_unitig_0.468, evm.model.Ug_unitig_0.634, evm.model.Ug_unitig_0.762, evm.model.Ug_unitig_0.835, evm.model.Ug_unitig_0.900, evm.model.Ug_un…
GO:0031410	CC	e	2.07e-03	290	6.04102	5	45/2488	203/17760	cytoplasmic vesicle	1.50e-03	45	evm.model.Ug_unitig_0.1320, evm.model.Ug_unitig_0.1984, evm.model.Ug_unitig_0.2532, evm.model.Ug_unitig_0.714, evm.model.Ug_unitig_0.839, evm.model.Ug_unitig_0.932, evm.model.Ug_unitig_21.509, evm.model.Ug_unitig_21.861, evm.model.Ug_unitig_22.1313, evm.model.Ug_unitig_22.538, evm.model.Ug_unitig_26.1114, evm.model.Ug_unitig_26.350, evm.model.Ug_unitig_26.374, evm.model.Ug_unitig_26.77, evm.model…
GO:0005768	CC	e	2.07e-03	77	6.04102	6	45/2488	203/17760	endosome	1.50e-03	45	evm.model.Ug_unitig_0.1320, evm.model.Ug_unitig_0.1984, evm.model.Ug_unitig_0.2532, evm.model.Ug_unitig_0.714, evm.model.Ug_unitig_0.839, evm.model.Ug_unitig_0.932, evm.model.Ug_unitig_21.509, evm.model.Ug_unitig_21.861, evm.model.Ug_unitig_22.1313, evm.model.Ug_unitig_22.538, evm.model.Ug_unitig_26.1114, evm.model.Ug_unitig_26.350, evm.model.Ug_unitig_26.374, evm.model.Ug_unitig_26.77, evm.model…
Broad
GO	NS	enrichment	p_fdr_bh	dcnt	tinfo	depth	ratio_in_study	ratio_in_pop	name	p_uncorrected	study_count	study_items
GO:0030312	CC	p	2.40e-05	88	5.51358	2	6/2488	344/17760	external encapsulating structure	1.97e-06	6	evm.model.Ug_unitig_0.2002, evm.model.Ug_unitig_0.60, evm.model.Ug_unitig_26.68, evm.model.Ug_unitig_27.166, evm.model.Ug_unitig_37.634, evm.model.Ug_unitig_747.673
GO:0005886	CC	p	2.40e-05	473	3.54104	2	137/2488	2473/17760	plasma membrane	6.79e-06	137	evm.model.Ug_unitig_0.1305, evm.model.Ug_unitig_0.1353, evm.model.Ug_unitig_0.1355, evm.model.Ug_unitig_0.140, evm.model.Ug_unitig_0.141, evm.model.Ug_unitig_0.1813, evm.model.Ug_unitig_0.1855, evm.model.Ug_unitig_0.2120, evm.model.Ug_unitig_0.22, evm.model.Ug_unitig_0.288, evm.model.Ug_unitig_0.379, evm.model.Ug_unitig_0.60, evm.model.Ug_unitig_0.600, evm.model.Ug_unitig_0.900, evm.model.Ug_unit…
GO:0044464	CC	e	2.46e-05	3335	2.18013	1	1482/2488	9644/17760	cell part	1.05e-05	1482	evm.model.Ug_unitig_0.1, evm.model.Ug_unitig_0.1006, evm.model.Ug_unitig_0.1035, evm.model.Ug_unitig_0.1041, evm.model.Ug_unitig_0.1052, evm.model.Ug_unitig_0.1063, evm.model.Ug_unitig_0.1071, evm.model.Ug_unitig_0.1076, evm.model.Ug_unitig_0.1091, evm.model.Ug_unitig_0.1093, evm.model.Ug_unitig_0.1099, evm.model.Ug_unitig_0.11, evm.model.Ug_unitig_0.1100, evm.model.Ug_unitig_0.1108, evm.model.Ug…
GO:0071840	BP	e	2.62e-05	3545	4.19144	1	496/2488	2854/17760	cellular component organization or biogenesis	7.53e-06	496	evm.model.Ug_unitig_0.1, evm.model.Ug_unitig_0.1035, evm.model.Ug_unitig_0.1063, evm.model.Ug_unitig_0.1146, evm.model.Ug_unitig_0.1224, evm.model.Ug_unitig_0.1279, evm.model.Ug_unitig_0.1320, evm.model.Ug_unitig_0.1351, evm.model.Ug_unitig_0.1422, evm.model.Ug_unitig_0.1441, evm.model.Ug_unitig_0.1615, evm.model.Ug_unitig_0.1718, evm.model.Ug_unitig_0.1926, evm.model.Ug_unitig_0.195, evm.model.U…
GO:0019748	BP	p	2.62e-05	578	6.44413	2	11/2488	300/17760	secondary metabolic process	2.00e-06	11	evm.model.Ug_unitig_0.1353, evm.model.Ug_unitig_0.2120, evm.model.Ug_unitig_21.435, evm.model.Ug_unitig_52.758, evm.model.Ug_unitig_699.814, evm.model.Ug_unitig_736.105, evm.model.Ug_unitig_736.286, evm.model.Ug_unitig_748.345, evm.model.Ug_unitig_8.17, evm.model.Ug_unitig_88.23, evm.model.Ug_unitig_899.960
GO:0071704	BP	p	3.89e-05	9043	3.10174	2	1081/2488	8486/17760	organic substance metabolic process	1.35e-05	1081	evm.model.Ug_unitig_0.1, evm.model.Ug_unitig_0.1006, evm.model.Ug_unitig_0.1035, evm.model.Ug_unitig_0.1041, evm.model.Ug_unitig_0.1052, evm.model.Ug_unitig_0.1063, evm.model.Ug_unitig_0.1093, evm.model.Ug_unitig_0.1099, evm.model.Ug_unitig_0.11, evm.model.Ug_unitig_0.1100, evm.model.Ug_unitig_0.1108, evm.model.Ug_unitig_0.1139, evm.model.Ug_unitig_0.115, evm.model.Ug_unitig_0.117, evm.model.Ug_u…
GO:0044238	BP	p	3.89e-05	6646	3.10174	2	1081/2488	8486/17760	primary metabolic process	1.35e-05	1081	evm.model.Ug_unitig_0.1, evm.model.Ug_unitig_0.1006, evm.model.Ug_unitig_0.1035, evm.model.Ug_unitig_0.1041, evm.model.Ug_unitig_0.1052, evm.model.Ug_unitig_0.1063, evm.model.Ug_unitig_0.1093, evm.model.Ug_unitig_0.1099, evm.model.Ug_unitig_0.11, evm.model.Ug_unitig_0.1100, evm.model.Ug_unitig_0.1108, evm.model.Ug_unitig_0.1139, evm.model.Ug_unitig_0.115, evm.model.Ug_unitig_0.117, evm.model.Ug_u…
GO:0043412	BP	p	4.36e-05	1487	4.3457	4	273/2488	2446/17760	macromolecule modification	1.69e-05	273	evm.model.Ug_unitig_0.1, evm.model.Ug_unitig_0.1093, evm.model.Ug_unitig_0.119, evm.model.Ug_unitig_0.1287, evm.model.Ug_unitig_0.140, evm.model.Ug_unitig_0.141, evm.model.Ug_unitig_0.1494, evm.model.Ug_unitig_0.179, evm.model.Ug_unitig_0.1821, evm.model.Ug_unitig_0.1926, evm.model.Ug_unitig_0.1955, evm.model.Ug_unitig_0.2059, evm.model.Ug_unitig_0.207, evm.model.Ug_unitig_0.2143, evm.model.Ug_un…
GO:0031975	CC	e	6.76e-05	164	6.54204	2	35/2488	123/17760	envelope	3.45e-05	35	evm.model.Ug_unitig_0.217, evm.model.Ug_unitig_21.489, evm.model.Ug_unitig_21.490, evm.model.Ug_unitig_22.1118, evm.model.Ug_unitig_22.1133, evm.model.Ug_unitig_22.236, evm.model.Ug_unitig_22.387, evm.model.Ug_unitig_22.645, evm.model.Ug_unitig_22.646, evm.model.Ug_unitig_26.185, evm.model.Ug_unitig_26.274, evm.model.Ug_unitig_26.93, evm.model.Ug_unitig_27.383, evm.model.Ug_unitig_27.392, evm.mod…
GO:0016020	CC	p	1.02e-04	1048	2.38532	1	1007/2488	7855/17760	membrane	5.64e-05	1007	evm.model.Ug_unitig_0.1052, evm.model.Ug_unitig_0.1063, evm.model.Ug_unitig_0.1064, evm.model.Ug_unitig_0.1071, evm.model.Ug_unitig_0.1091, evm.model.Ug_unitig_0.1093, evm.model.Ug_unitig_0.1122, evm.model.Ug_unitig_0.1146, evm.model.Ug_unitig_0.1195, evm.model.Ug_unitig_0.1203, evm.model.Ug_unitig_0.1252, evm.model.Ug_unitig_0.1287, evm.model.Ug_unitig_0.1305, evm.model.Ug_unitig_0.1320, evm.mod…
GO:0009987	BP	p	2.06e-02	18757	2.83375	1	1497/2488	11094/17760	cellular process	1.09e-02	1497	evm.model.Ug_unitig_0.1, evm.model.Ug_unitig_0.1006, evm.model.Ug_unitig_0.1035, evm.model.Ug_unitig_0.1041, evm.model.Ug_unitig_0.1052, evm.model.Ug_unitig_0.1063, evm.model.Ug_unitig_0.1071, evm.model.Ug_unitig_0.1076, evm.model.Ug_unitig_0.1091, evm.model.Ug_unitig_0.1093, evm.model.Ug_unitig_0.1099, evm.model.Ug_unitig_0.11, evm.model.Ug_unitig_0.1100, evm.model.Ug_unitig_0.1108, evm.model.Ug…
GO:0034641	BP	e	2.10e-02	3512	3.75447	3	670/2488	4418/17760	cellular nitrogen compound metabolic process	1.15e-02	670	evm.model.Ug_unitig_0.1, evm.model.Ug_unitig_0.1006, evm.model.Ug_unitig_0.1035, evm.model.Ug_unitig_0.1041, evm.model.Ug_unitig_0.1099, evm.model.Ug_unitig_0.11, evm.model.Ug_unitig_0.1100, evm.model.Ug_unitig_0.1108, evm.model.Ug_unitig_0.115, evm.model.Ug_unitig_0.117, evm.model.Ug_unitig_0.119, evm.model.Ug_unitig_0.1216, evm.model.Ug_unitig_0.1252, evm.model.Ug_unitig_0.1260, evm.model.Ug_un…
GO:0009056	BP	p	2.10e-02	1842	4.76455	2	192/2488	1609/17760	catabolic process	1.16e-02	192	evm.model.Ug_unitig_0.1108, evm.model.Ug_unitig_0.1353, evm.model.Ug_unitig_0.179, evm.model.Ug_unitig_0.180, evm.model.Ug_unitig_0.2050, evm.model.Ug_unitig_0.2120, evm.model.Ug_unitig_0.2137, evm.model.Ug_unitig_0.2138, evm.model.Ug_unitig_0.2329, evm.model.Ug_unitig_0.26, evm.model.Ug_unitig_0.350, evm.model.Ug_unitig_0.363, evm.model.Ug_unitig_0.454, evm.model.Ug_unitig_0.456, evm.model.Ug_un…
GO:1901564	BP	p	2.29e-02	4182	3.93752	3	469/2488	3679/17760	organonitrogen compound metabolic process	1.31e-02	469	evm.model.Ug_unitig_0.1, evm.model.Ug_unitig_0.1063, evm.model.Ug_unitig_0.1093, evm.model.Ug_unitig_0.119, evm.model.Ug_unitig_0.1216, evm.model.Ug_unitig_0.1252, evm.model.Ug_unitig_0.1260, evm.model.Ug_unitig_0.1287, evm.model.Ug_unitig_0.1355, evm.model.Ug_unitig_0.1396, evm.model.Ug_unitig_0.140, evm.model.Ug_unitig_0.141, evm.model.Ug_unitig_0.1478, evm.model.Ug_unitig_0.1494, evm.model.Ug_…
GO:0019222	BP	e	3.64e-02	3380	6.95496	3	36/2488	180/17760	regulation of metabolic process	2.34e-02	36	evm.model.Ug_unitig_0.1108, evm.model.Ug_unitig_0.1441, evm.model.Ug_unitig_0.453, evm.model.Ug_unitig_0.641, evm.model.Ug_unitig_0.843, evm.model.Ug_unitig_21.280, evm.model.Ug_unitig_21.489, evm.model.Ug_unitig_21.490, evm.model.Ug_unitig_21.595, evm.model.Ug_unitig_26.351, evm.model.Ug_unitig_26.910, evm.model.Ug_unitig_32.262, evm.model.Ug_unitig_32.391, evm.model.Ug_unitig_37.1071, evm.model…
GO:0060255	BP	e	3.64e-02	2128	6.95496	4	36/2488	180/17760	regulation of macromolecule metabolic process	2.34e-02	36	evm.model.Ug_unitig_0.1108, evm.model.Ug_unitig_0.1441, evm.model.Ug_unitig_0.453, evm.model.Ug_unitig_0.641, evm.model.Ug_unitig_0.843, evm.model.Ug_unitig_21.280, evm.model.Ug_unitig_21.489, evm.model.Ug_unitig_21.490, evm.model.Ug_unitig_21.595, evm.model.Ug_unitig_26.351, evm.model.Ug_unitig_26.910, evm.model.Ug_unitig_32.262, evm.model.Ug_unitig_32.391, evm.model.Ug_unitig_37.1071, evm.model…
GO:0010468	BP	e	3.64e-02	866	6.95496	5	36/2488	180/17760	regulation of gene expression	2.34e-02	36	evm.model.Ug_unitig_0.1108, evm.model.Ug_unitig_0.1441, evm.model.Ug_unitig_0.453, evm.model.Ug_unitig_0.641, evm.model.Ug_unitig_0.843, evm.model.Ug_unitig_21.280, evm.model.Ug_unitig_21.489, evm.model.Ug_unitig_21.490, evm.model.Ug_unitig_21.595, evm.model.Ug_unitig_26.351, evm.model.Ug_unitig_26.910, evm.model.Ug_unitig_32.262, evm.model.Ug_unitig_32.391, evm.model.Ug_unitig_37.1071, evm.model…
GO:1901360	BP	e	4.70e-02	3874	3.84714	3	606/2488	4027/17760	organic cyclic compound metabolic process	3.21e-02	606	evm.model.Ug_unitig_0.1, evm.model.Ug_unitig_0.1006, evm.model.Ug_unitig_0.1035, evm.model.Ug_unitig_0.1041, evm.model.Ug_unitig_0.1099, evm.model.Ug_unitig_0.11, evm.model.Ug_unitig_0.1100, evm.model.Ug_unitig_0.1108, evm.model.Ug_unitig_0.115, evm.model.Ug_unitig_0.117, evm.model.Ug_unitig_0.119, evm.model.Ug_unitig_0.1252, evm.model.Ug_unitig_0.1279, evm.model.Ug_unitig_0.1287, evm.model.Ug_un…
GO:0006725	BP	e	4.70e-02	3345	3.84714	3	606/2488	4027/17760	cellular aromatic compound metabolic process	3.21e-02	606	evm.model.Ug_unitig_0.1, evm.model.Ug_unitig_0.1006, evm.model.Ug_unitig_0.1035, evm.model.Ug_unitig_0.1041, evm.model.Ug_unitig_0.1099, evm.model.Ug_unitig_0.11, evm.model.Ug_unitig_0.1100, evm.model.Ug_unitig_0.1108, evm.model.Ug_unitig_0.115, evm.model.Ug_unitig_0.117, evm.model.Ug_unitig_0.119, evm.model.Ug_unitig_0.1252, evm.model.Ug_unitig_0.1279, evm.model.Ug_unitig_0.1287, evm.model.Ug_un…
GO:0046483	BP	e	4.70e-02	3260	3.84714	3	606/2488	4027/17760	heterocycle metabolic process	3.21e-02	606	evm.model.Ug_unitig_0.1, evm.model.Ug_unitig_0.1006, evm.model.Ug_unitig_0.1035, evm.model.Ug_unitig_0.1041, evm.model.Ug_unitig_0.1099, evm.model.Ug_unitig_0.11, evm.model.Ug_unitig_0.1100, evm.model.Ug_unitig_0.1108, evm.model.Ug_unitig_0.115, evm.model.Ug_unitig_0.117, evm.model.Ug_unitig_0.119, evm.model.Ug_unitig_0.1252, evm.model.Ug_unitig_0.1279, evm.model.Ug_unitig_0.1287, evm.model.Ug_un…
Misc.
GO	NS	enrichment	p_fdr_bh	dcnt	tinfo	depth	ratio_in_study	ratio_in_pop	name	p_uncorrected	study_count	study_items
GO:0003674	MF	p	2.29e-05	11075	1.72402	0	1824/2488	15069/17760	molecular_function	6.93e-06	1824	evm.model.Ug_unitig_0.1, evm.model.Ug_unitig_0.1006, evm.model.Ug_unitig_0.1026, evm.model.Ug_unitig_0.1035, evm.model.Ug_unitig_0.1041, evm.model.Ug_unitig_0.1052, evm.model.Ug_unitig_0.1055, evm.model.Ug_unitig_0.1063, evm.model.Ug_unitig_0.1071, evm.model.Ug_unitig_0.1076, evm.model.Ug_unitig_0.1082, evm.model.Ug_unitig_0.1087, evm.model.Ug_unitig_0.1091, evm.model.Ug_unitig_0.1093, evm.model.…
GO:0097159	MF	p	2.29e-05	493	2.64473	2	562/2488	6001/17760	organic cyclic compound binding	9.16e-06	562	evm.model.Ug_unitig_0.1, evm.model.Ug_unitig_0.1006, evm.model.Ug_unitig_0.1035, evm.model.Ug_unitig_0.1041, evm.model.Ug_unitig_0.1099, evm.model.Ug_unitig_0.1100, evm.model.Ug_unitig_0.1108, evm.model.Ug_unitig_0.1122, evm.model.Ug_unitig_0.119, evm.model.Ug_unitig_0.1252, evm.model.Ug_unitig_0.1279, evm.model.Ug_unitig_0.1326, evm.model.Ug_unitig_0.1327, evm.model.Ug_unitig_0.1330, evm.model.U…
GO:1901363	MF	p	2.29e-05	452	2.64473	2	562/2488	6001/17760	heterocyclic compound binding	9.16e-06	562	evm.model.Ug_unitig_0.1, evm.model.Ug_unitig_0.1006, evm.model.Ug_unitig_0.1035, evm.model.Ug_unitig_0.1041, evm.model.Ug_unitig_0.1099, evm.model.Ug_unitig_0.1100, evm.model.Ug_unitig_0.1108, evm.model.Ug_unitig_0.1122, evm.model.Ug_unitig_0.119, evm.model.Ug_unitig_0.1252, evm.model.Ug_unitig_0.1279, evm.model.Ug_unitig_0.1326, evm.model.Ug_unitig_0.1327, evm.model.Ug_unitig_0.1330, evm.model.U…
GO:0036094	MF	p	2.29e-05	186	3.51518	2	173/2488	2513/17760	small molecule binding	7.76e-06	173	evm.model.Ug_unitig_0.1, evm.model.Ug_unitig_0.1041, evm.model.Ug_unitig_0.1122, evm.model.Ug_unitig_0.119, evm.model.Ug_unitig_0.1252, evm.model.Ug_unitig_0.1326, evm.model.Ug_unitig_0.1327, evm.model.Ug_unitig_0.1330, evm.model.Ug_unitig_0.1351, evm.model.Ug_unitig_0.1457, evm.model.Ug_unitig_0.1615, evm.model.Ug_unitig_0.1718, evm.model.Ug_unitig_0.1938, evm.model.Ug_unitig_0.198, evm.model.Ug…
GO:1901265	MF	p	2.29e-05	58	3.51677	3	170/2488	2509/17760	nucleoside phosphate binding	6.61e-06	170	evm.model.Ug_unitig_0.1, evm.model.Ug_unitig_0.1041, evm.model.Ug_unitig_0.1122, evm.model.Ug_unitig_0.119, evm.model.Ug_unitig_0.1252, evm.model.Ug_unitig_0.1326, evm.model.Ug_unitig_0.1327, evm.model.Ug_unitig_0.1330, evm.model.Ug_unitig_0.1351, evm.model.Ug_unitig_0.1457, evm.model.Ug_unitig_0.1615, evm.model.Ug_unitig_0.1718, evm.model.Ug_unitig_0.1938, evm.model.Ug_unitig_0.198, evm.model.Ug…
GO:0005215	MF	p	2.29e-05	1056	4.26607	1	86/2488	1186/17760	transporter activity	5.14e-06	86	evm.model.Ug_unitig_0.1195, evm.model.Ug_unitig_0.1305, evm.model.Ug_unitig_0.1818, evm.model.Ug_unitig_0.1950, evm.model.Ug_unitig_0.217, evm.model.Ug_unitig_0.240, evm.model.Ug_unitig_0.2471, evm.model.Ug_unitig_0.288, evm.model.Ug_unitig_0.345, evm.model.Ug_unitig_0.60, evm.model.Ug_unitig_0.607, evm.model.Ug_unitig_0.927, evm.model.Ug_unitig_21.489, evm.model.Ug_unitig_21.490, evm.model.Ug_un…
GO:0005515	MF	p	2.29e-05	969	2.9546	2	466/2488	4402/17760	protein binding	8.22e-06	466	evm.model.Ug_unitig_0.1, evm.model.Ug_unitig_0.1006, evm.model.Ug_unitig_0.1063, evm.model.Ug_unitig_0.1076, evm.model.Ug_unitig_0.1087, evm.model.Ug_unitig_0.1122, evm.model.Ug_unitig_0.117, evm.model.Ug_unitig_0.1224, evm.model.Ug_unitig_0.1252, evm.model.Ug_unitig_0.1320, evm.model.Ug_unitig_0.1322, evm.model.Ug_unitig_0.1330, evm.model.Ug_unitig_0.1391, evm.model.Ug_unitig_0.140, evm.model.Ug…
GO:0060089	MF	p	2.29e-05	413	5.77226	1	1/2488	263/17760	molecular transducer activity	2.51e-06	1	evm.model.Ug_unitig_8.1692
GO:0038023	MF	p	2.29e-05	397	5.77226	2	1/2488	263/17760	signaling receptor activity	2.51e-06	1	evm.model.Ug_unitig_8.1692
GO:0003676	MF	p	2.29e-05	328	3.08988	3	431/2488	3845/17760	nucleic acid binding	8.01e-06	431	evm.model.Ug_unitig_0.1006, evm.model.Ug_unitig_0.1035, evm.model.Ug_unitig_0.1099, evm.model.Ug_unitig_0.1100, evm.model.Ug_unitig_0.1108, evm.model.Ug_unitig_0.119, evm.model.Ug_unitig_0.1279, evm.model.Ug_unitig_0.141, evm.model.Ug_unitig_0.1414, evm.model.Ug_unitig_0.1422, evm.model.Ug_unitig_0.1440, evm.model.Ug_unitig_0.1441, evm.model.Ug_unitig_0.1457, evm.model.Ug_unitig_0.1478, evm.model…
GO:0003677	MF	p	2.29e-05	146	3.68618	4	176/2488	2118/17760	DNA binding	6.53e-06	176	evm.model.Ug_unitig_0.1006, evm.model.Ug_unitig_0.1099, evm.model.Ug_unitig_0.1100, evm.model.Ug_unitig_0.1279, evm.model.Ug_unitig_0.1441, evm.model.Ug_unitig_0.1478, evm.model.Ug_unitig_0.1718, evm.model.Ug_unitig_0.1784, evm.model.Ug_unitig_0.196, evm.model.Ug_unitig_0.2054, evm.model.Ug_unitig_0.2107, evm.model.Ug_unitig_0.2194, evm.model.Ug_unitig_0.2357, evm.model.Ug_unitig_0.26, evm.model.…
GO:0000166	MF	p	2.29e-05	56	3.51677	4	170/2488	2509/17760	nucleotide binding	6.61e-06	170	evm.model.Ug_unitig_0.1, evm.model.Ug_unitig_0.1041, evm.model.Ug_unitig_0.1122, evm.model.Ug_unitig_0.119, evm.model.Ug_unitig_0.1252, evm.model.Ug_unitig_0.1326, evm.model.Ug_unitig_0.1327, evm.model.Ug_unitig_0.1330, evm.model.Ug_unitig_0.1351, evm.model.Ug_unitig_0.1457, evm.model.Ug_unitig_0.1615, evm.model.Ug_unitig_0.1718, evm.model.Ug_unitig_0.1938, evm.model.Ug_unitig_0.198, evm.model.Ug…
GO:0140110	MF	p	2.29e-05	29	3.93286	1	72/2488	1655/17760	transcription regulator activity	5.48e-06	72	evm.model.Ug_unitig_0.1, evm.model.Ug_unitig_0.1797, evm.model.Ug_unitig_0.2231, evm.model.Ug_unitig_0.2357, evm.model.Ug_unitig_0.385, evm.model.Ug_unitig_0.713, evm.model.Ug_unitig_0.79, evm.model.Ug_unitig_21.595, evm.model.Ug_unitig_21.687, evm.model.Ug_unitig_21.812, evm.model.Ug_unitig_22.1550, evm.model.Ug_unitig_22.53, evm.model.Ug_unitig_22.54, evm.model.Ug_unitig_22.80, evm.model.Ug_uni…
GO:0003700	MF	p	2.29e-05	8	4.01466	2	39/2488	1525/17760	DNA-binding transcription factor activity	5.06e-06	39	evm.model.Ug_unitig_0.1797, evm.model.Ug_unitig_0.2357, evm.model.Ug_unitig_0.713, evm.model.Ug_unitig_0.79, evm.model.Ug_unitig_21.595, evm.model.Ug_unitig_22.1550, evm.model.Ug_unitig_22.53, evm.model.Ug_unitig_22.54, evm.model.Ug_unitig_22.80, evm.model.Ug_unitig_26.115, evm.model.Ug_unitig_26.1308, evm.model.Ug_unitig_26.1505, evm.model.Ug_unitig_26.506, evm.model.Ug_unitig_27.119, evm.model.…
GO:0005575	CC	e	2.40e-05	4212	1.91182	0	1895/2488	12612/17760	cellular_component	8.26e-06	1895	evm.model.Ug_unitig_0.1, evm.model.Ug_unitig_0.1006, evm.model.Ug_unitig_0.1035, evm.model.Ug_unitig_0.1041, evm.model.Ug_unitig_0.1052, evm.model.Ug_unitig_0.1063, evm.model.Ug_unitig_0.1064, evm.model.Ug_unitig_0.1071, evm.model.Ug_unitig_0.1076, evm.model.Ug_unitig_0.1091, evm.model.Ug_unitig_0.1093, evm.model.Ug_unitig_0.1099, evm.model.Ug_unitig_0.11, evm.model.Ug_unitig_0.1100, evm.model.Ug…
GO:0043226	CC	e	2.40e-05	1957	2.86235	1	950/2488	4875/17760	organelle	9.18e-06	950	evm.model.Ug_unitig_0.1006, evm.model.Ug_unitig_0.1035, evm.model.Ug_unitig_0.1041, evm.model.Ug_unitig_0.1052, evm.model.Ug_unitig_0.1063, evm.model.Ug_unitig_0.1071, evm.model.Ug_unitig_0.1091, evm.model.Ug_unitig_0.1093, evm.model.Ug_unitig_0.1099, evm.model.Ug_unitig_0.11, evm.model.Ug_unitig_0.1100, evm.model.Ug_unitig_0.1108, evm.model.Ug_unitig_0.1139, evm.model.Ug_unitig_0.1146, evm.model…
GO:0043229	CC	e	2.40e-05	1784	2.86235	3	950/2488	4875/17760	intracellular organelle	9.18e-06	950	evm.model.Ug_unitig_0.1006, evm.model.Ug_unitig_0.1035, evm.model.Ug_unitig_0.1041, evm.model.Ug_unitig_0.1052, evm.model.Ug_unitig_0.1063, evm.model.Ug_unitig_0.1071, evm.model.Ug_unitig_0.1091, evm.model.Ug_unitig_0.1093, evm.model.Ug_unitig_0.1099, evm.model.Ug_unitig_0.11, evm.model.Ug_unitig_0.1100, evm.model.Ug_unitig_0.1108, evm.model.Ug_unitig_0.1139, evm.model.Ug_unitig_0.1146, evm.model…
GO:0043227	CC	e	2.40e-05	1367	3.06218	2	787/2488	3992/17760	membrane-bounded organelle	8.29e-06	787	evm.model.Ug_unitig_0.1006, evm.model.Ug_unitig_0.1041, evm.model.Ug_unitig_0.1052, evm.model.Ug_unitig_0.1063, evm.model.Ug_unitig_0.1071, evm.model.Ug_unitig_0.1091, evm.model.Ug_unitig_0.1093, evm.model.Ug_unitig_0.1100, evm.model.Ug_unitig_0.1139, evm.model.Ug_unitig_0.1146, evm.model.Ug_unitig_0.1157, evm.model.Ug_unitig_0.1203, evm.model.Ug_unitig_0.1252, evm.model.Ug_unitig_0.1260, evm.mod…
GO:0043231	CC	e	2.40e-05	1050	3.08523	4	759/2488	3901/17760	intracellular membrane-bounded organelle	8.91e-06	759	evm.model.Ug_unitig_0.1006, evm.model.Ug_unitig_0.1041, evm.model.Ug_unitig_0.1052, evm.model.Ug_unitig_0.1063, evm.model.Ug_unitig_0.1071, evm.model.Ug_unitig_0.1091, evm.model.Ug_unitig_0.1093, evm.model.Ug_unitig_0.1100, evm.model.Ug_unitig_0.1139, evm.model.Ug_unitig_0.1146, evm.model.Ug_unitig_0.1157, evm.model.Ug_unitig_0.1203, evm.model.Ug_unitig_0.1252, evm.model.Ug_unitig_0.1260, evm.mod…
GO:0044422	CC	e	2.40e-05	1634	4.34211	1	259/2488	1110/17760	organelle part	4.92e-06	259	evm.model.Ug_unitig_0.1, evm.model.Ug_unitig_0.1035, evm.model.Ug_unitig_0.1099, evm.model.Ug_unitig_0.11, evm.model.Ug_unitig_0.1108, evm.model.Ug_unitig_0.115, evm.model.Ug_unitig_0.140, evm.model.Ug_unitig_0.141, evm.model.Ug_unitig_0.1422, evm.model.Ug_unitig_0.1491, evm.model.Ug_unitig_0.1600, evm.model.Ug_unitig_0.1751, evm.model.Ug_unitig_0.2107, evm.model.Ug_unitig_0.2143, evm.model.Ug_un…
GO:0044446	CC	e	2.40e-05	1473	4.34211	3	259/2488	1110/17760	intracellular organelle part	4.92e-06	259	evm.model.Ug_unitig_0.1, evm.model.Ug_unitig_0.1035, evm.model.Ug_unitig_0.1099, evm.model.Ug_unitig_0.11, evm.model.Ug_unitig_0.1108, evm.model.Ug_unitig_0.115, evm.model.Ug_unitig_0.140, evm.model.Ug_unitig_0.141, evm.model.Ug_unitig_0.1422, evm.model.Ug_unitig_0.1491, evm.model.Ug_unitig_0.1600, evm.model.Ug_unitig_0.1751, evm.model.Ug_unitig_0.2107, evm.model.Ug_unitig_0.2143, evm.model.Ug_un…
GO:0044444	CC	e	2.40e-05	1270	2.80398	3	914/2488	5168/17760	cytoplasmic part	8.47e-06	914	evm.model.Ug_unitig_0.1041, evm.model.Ug_unitig_0.1052, evm.model.Ug_unitig_0.1063, evm.model.Ug_unitig_0.1071, evm.model.Ug_unitig_0.1091, evm.model.Ug_unitig_0.1093, evm.model.Ug_unitig_0.1126, evm.model.Ug_unitig_0.1139, evm.model.Ug_unitig_0.1146, evm.model.Ug_unitig_0.1157, evm.model.Ug_unitig_0.117, evm.model.Ug_unitig_0.119, evm.model.Ug_unitig_0.1203, evm.model.Ug_unitig_0.1252, evm.model…
GO:0005634	CC	e	2.40e-05	517	5.54308	5	102/2488	334/17760	nucleus	2.07e-06	102	evm.model.Ug_unitig_0.1006, evm.model.Ug_unitig_0.1100, evm.model.Ug_unitig_0.1279, evm.model.Ug_unitig_0.1441, evm.model.Ug_unitig_0.1525, evm.model.Ug_unitig_0.1718, evm.model.Ug_unitig_0.1784, evm.model.Ug_unitig_0.275, evm.model.Ug_unitig_0.305, evm.model.Ug_unitig_0.309, evm.model.Ug_unitig_0.485, evm.model.Ug_unitig_21.137, evm.model.Ug_unitig_21.817, evm.model.Ug_unitig_22.1448, evm.model.…
GO:0044428	CC	e	2.40e-05	496	4.34211	4	259/2488	1110/17760	nuclear part	4.92e-06	259	evm.model.Ug_unitig_0.1, evm.model.Ug_unitig_0.1035, evm.model.Ug_unitig_0.1099, evm.model.Ug_unitig_0.11, evm.model.Ug_unitig_0.1108, evm.model.Ug_unitig_0.115, evm.model.Ug_unitig_0.140, evm.model.Ug_unitig_0.141, evm.model.Ug_unitig_0.1422, evm.model.Ug_unitig_0.1491, evm.model.Ug_unitig_0.1600, evm.model.Ug_unitig_0.1751, evm.model.Ug_unitig_0.2107, evm.model.Ug_unitig_0.2143, evm.model.Ug_un…
GO:0005654	CC	e	2.40e-05	122	4.94076	5	148/2488	610/17760	nucleoplasm	3.23e-06	148	evm.model.Ug_unitig_0.1, evm.model.Ug_unitig_0.1108, evm.model.Ug_unitig_0.140, evm.model.Ug_unitig_0.141, evm.model.Ug_unitig_0.1751, evm.model.Ug_unitig_0.2107, evm.model.Ug_unitig_0.2178, evm.model.Ug_unitig_0.2194, evm.model.Ug_unitig_0.2231, evm.model.Ug_unitig_0.2250, evm.model.Ug_unitig_0.229, evm.model.Ug_unitig_0.2337, evm.model.Ug_unitig_0.2485, evm.model.Ug_unitig_0.2486, evm.model.Ug_…
GO:0005576	CC	p	2.40e-05	181	5.50202	1	20/2488	348/17760	extracellular region	3.36e-06	20	evm.model.Ug_unitig_0.2002, evm.model.Ug_unitig_0.396, evm.model.Ug_unitig_21.290, evm.model.Ug_unitig_21.604, evm.model.Ug_unitig_22.187, evm.model.Ug_unitig_26.975, evm.model.Ug_unitig_26.976, evm.model.Ug_unitig_27.15, evm.model.Ug_unitig_32.957, evm.model.Ug_unitig_46.578, evm.model.Ug_unitig_46.98, evm.model.Ug_unitig_578.487, evm.model.Ug_unitig_578.917, evm.model.Ug_unitig_62.206, evm.mode…
GO:0009536	CC	e	2.40e-05	137	3.73695	5	413/2488	2033/17760	plastid	6.16e-06	413	evm.model.Ug_unitig_0.1041, evm.model.Ug_unitig_0.1052, evm.model.Ug_unitig_0.1063, evm.model.Ug_unitig_0.1071, evm.model.Ug_unitig_0.1091, evm.model.Ug_unitig_0.1139, evm.model.Ug_unitig_0.1203, evm.model.Ug_unitig_0.1252, evm.model.Ug_unitig_0.1326, evm.model.Ug_unitig_0.1330, evm.model.Ug_unitig_0.1351, evm.model.Ug_unitig_0.1353, evm.model.Ug_unitig_0.1441, evm.model.Ug_unitig_0.160, evm.mode…
GO:0009507	CC	e	2.40e-05	49	3.78018	6	397/2488	1947/17760	chloroplast	6.64e-06	397	evm.model.Ug_unitig_0.1041, evm.model.Ug_unitig_0.1052, evm.model.Ug_unitig_0.1063, evm.model.Ug_unitig_0.1071, evm.model.Ug_unitig_0.1091, evm.model.Ug_unitig_0.1139, evm.model.Ug_unitig_0.1203, evm.model.Ug_unitig_0.1252, evm.model.Ug_unitig_0.1326, evm.model.Ug_unitig_0.1330, evm.model.Ug_unitig_0.1351, evm.model.Ug_unitig_0.1353, evm.model.Ug_unitig_0.1441, evm.model.Ug_unitig_0.160, evm.mode…
GO:0005618	CC	p	2.40e-05	45	5.51358	3	6/2488	344/17760	cell wall	1.97e-06	6	evm.model.Ug_unitig_0.2002, evm.model.Ug_unitig_0.60, evm.model.Ug_unitig_26.68, evm.model.Ug_unitig_27.166, evm.model.Ug_unitig_37.634, evm.model.Ug_unitig_747.673
GO:0044424	CC	e	2.46e-05	2384	2.42122	2	1360/2488	7578/17760	intracellular part	1.00e-05	1360	evm.model.Ug_unitig_0.1, evm.model.Ug_unitig_0.1006, evm.model.Ug_unitig_0.1035, evm.model.Ug_unitig_0.1041, evm.model.Ug_unitig_0.1052, evm.model.Ug_unitig_0.1063, evm.model.Ug_unitig_0.1071, evm.model.Ug_unitig_0.1076, evm.model.Ug_unitig_0.1091, evm.model.Ug_unitig_0.1093, evm.model.Ug_unitig_0.1099, evm.model.Ug_unitig_0.11, evm.model.Ug_unitig_0.1100, evm.model.Ug_unitig_0.1108, evm.model.Ug…
GO:0005488	MF	p	2.47e-05	1903	2.10141	1	1139/2488	10332/17760	binding	1.05e-05	1139	evm.model.Ug_unitig_0.1, evm.model.Ug_unitig_0.1006, evm.model.Ug_unitig_0.1035, evm.model.Ug_unitig_0.1041, evm.model.Ug_unitig_0.1052, evm.model.Ug_unitig_0.1063, evm.model.Ug_unitig_0.1076, evm.model.Ug_unitig_0.1087, evm.model.Ug_unitig_0.1091, evm.model.Ug_unitig_0.1099, evm.model.Ug_unitig_0.1100, evm.model.Ug_unitig_0.1108, evm.model.Ug_unitig_0.1122, evm.model.Ug_unitig_0.1139, evm.model.…
GO:0008150	BP	p	2.62e-05	29700	2.6131	0	1808/2488	13833/17760	biological_process	8.30e-06	1808	evm.model.Ug_unitig_0.1, evm.model.Ug_unitig_0.1006, evm.model.Ug_unitig_0.1026, evm.model.Ug_unitig_0.1035, evm.model.Ug_unitig_0.1041, evm.model.Ug_unitig_0.1052, evm.model.Ug_unitig_0.1055, evm.model.Ug_unitig_0.1063, evm.model.Ug_unitig_0.1064, evm.model.Ug_unitig_0.1071, evm.model.Ug_unitig_0.1076, evm.model.Ug_unitig_0.1087, evm.model.Ug_unitig_0.1091, evm.model.Ug_unitig_0.1093, evm.model.…
GO:0065007	BP	p	2.62e-05	13140	4.42347	1	202/2488	2263/17760	biological regulation	6.46e-06	202	evm.model.Ug_unitig_0.1108, evm.model.Ug_unitig_0.1122, evm.model.Ug_unitig_0.1195, evm.model.Ug_unitig_0.1355, evm.model.Ug_unitig_0.1441, evm.model.Ug_unitig_0.2231, evm.model.Ug_unitig_0.2250, evm.model.Ug_unitig_0.2337, evm.model.Ug_unitig_0.244, evm.model.Ug_unitig_0.2531, evm.model.Ug_unitig_0.309, evm.model.Ug_unitig_0.453, evm.model.Ug_unitig_0.575, evm.model.Ug_unitig_0.602, evm.model.Ug…
GO:0050789	BP	p	2.62e-05	11820	4.66074	2	156/2488	1785/17760	regulation of biological process	5.70e-06	156	evm.model.Ug_unitig_0.1108, evm.model.Ug_unitig_0.1122, evm.model.Ug_unitig_0.1355, evm.model.Ug_unitig_0.1441, evm.model.Ug_unitig_0.2231, evm.model.Ug_unitig_0.2250, evm.model.Ug_unitig_0.2337, evm.model.Ug_unitig_0.244, evm.model.Ug_unitig_0.2531, evm.model.Ug_unitig_0.309, evm.model.Ug_unitig_0.453, evm.model.Ug_unitig_0.575, evm.model.Ug_unitig_0.602, evm.model.Ug_unitig_0.641, evm.model.Ug_…
GO:0050794	BP	p	2.62e-05	8358	4.7565	3	129/2488	1622/17760	regulation of cellular process	5.38e-06	129	evm.model.Ug_unitig_0.1122, evm.model.Ug_unitig_0.1355, evm.model.Ug_unitig_0.2231, evm.model.Ug_unitig_0.2250, evm.model.Ug_unitig_0.2337, evm.model.Ug_unitig_0.244, evm.model.Ug_unitig_0.2531, evm.model.Ug_unitig_0.309, evm.model.Ug_unitig_0.575, evm.model.Ug_unitig_0.602, evm.model.Ug_unitig_0.641, evm.model.Ug_unitig_0.661, evm.model.Ug_unitig_0.662, evm.model.Ug_unitig_0.669, evm.model.Ug_un…
GO:0032501	BP	p	2.62e-05	7576	4.37558	1	246/2488	2374/17760	multicellular organismal process	7.30e-06	246	evm.model.Ug_unitig_0.1006, evm.model.Ug_unitig_0.1026, evm.model.Ug_unitig_0.1035, evm.model.Ug_unitig_0.1087, evm.model.Ug_unitig_0.1224, evm.model.Ug_unitig_0.1252, evm.model.Ug_unitig_0.1279, evm.model.Ug_unitig_0.1320, evm.model.Ug_unitig_0.1355, evm.model.Ug_unitig_0.1441, evm.model.Ug_unitig_0.1767, evm.model.Ug_unitig_0.1926, evm.model.Ug_unitig_0.1930, evm.model.Ug_unitig_0.1938, evm.mod…
GO:0032502	BP	p	2.62e-05	6491	4.36719	1	234/2488	2394/17760	developmental process	6.82e-06	234	evm.model.Ug_unitig_0.1006, evm.model.Ug_unitig_0.1026, evm.model.Ug_unitig_0.1035, evm.model.Ug_unitig_0.1224, evm.model.Ug_unitig_0.1252, evm.model.Ug_unitig_0.1279, evm.model.Ug_unitig_0.1320, evm.model.Ug_unitig_0.1355, evm.model.Ug_unitig_0.1441, evm.model.Ug_unitig_0.1457, evm.model.Ug_unitig_0.1767, evm.model.Ug_unitig_0.1926, evm.model.Ug_unitig_0.1930, evm.model.Ug_unitig_0.1938, evm.mod…
GO:0048869	BP	p	2.62e-05	2573	5.52252	2	50/2488	754/17760	cellular developmental process	3.65e-06	50	evm.model.Ug_unitig_0.1320, evm.model.Ug_unitig_0.2231, evm.model.Ug_unitig_0.229, evm.model.Ug_unitig_0.2412, evm.model.Ug_unitig_0.927, evm.model.Ug_unitig_21.110, evm.model.Ug_unitig_21.251, evm.model.Ug_unitig_21.595, evm.model.Ug_unitig_21.604, evm.model.Ug_unitig_21.671, evm.model.Ug_unitig_21.744, evm.model.Ug_unitig_22.1000, evm.model.Ug_unitig_22.1119, evm.model.Ug_unitig_22.1120, evm.mo…
GO:0048856	BP	p	2.62e-05	6082	4.48733	2	225/2488	2123/17760	anatomical structure development	6.64e-06	225	evm.model.Ug_unitig_0.1006, evm.model.Ug_unitig_0.1026, evm.model.Ug_unitig_0.1035, evm.model.Ug_unitig_0.1224, evm.model.Ug_unitig_0.1252, evm.model.Ug_unitig_0.1279, evm.model.Ug_unitig_0.1320, evm.model.Ug_unitig_0.1355, evm.model.Ug_unitig_0.1441, evm.model.Ug_unitig_0.1457, evm.model.Ug_unitig_0.1767, evm.model.Ug_unitig_0.1926, evm.model.Ug_unitig_0.1930, evm.model.Ug_unitig_0.1938, evm.mod…
GO:0048731	BP	p	2.62e-05	4540	5.97205	3	28/2488	481/17760	system development	2.66e-06	28	evm.model.Ug_unitig_0.1026, evm.model.Ug_unitig_0.1441, evm.model.Ug_unitig_0.1926, evm.model.Ug_unitig_0.1950, evm.model.Ug_unitig_0.843, evm.model.Ug_unitig_22.1003, evm.model.Ug_unitig_26.115, evm.model.Ug_unitig_26.1252, evm.model.Ug_unitig_26.1277, evm.model.Ug_unitig_26.919, evm.model.Ug_unitig_27.462, evm.model.Ug_unitig_32.262, evm.model.Ug_unitig_52.213, evm.model.Ug_unitig_578.595, evm.…
GO:0009791	BP	p	2.62e-05	381	4.82937	2	152/2488	1508/17760	post-embryonic development	7.86e-06	152	evm.model.Ug_unitig_0.1006, evm.model.Ug_unitig_0.1026, evm.model.Ug_unitig_0.1087, evm.model.Ug_unitig_0.1252, evm.model.Ug_unitig_0.1441, evm.model.Ug_unitig_0.1926, evm.model.Ug_unitig_0.1930, evm.model.Ug_unitig_0.1950, evm.model.Ug_unitig_0.1955, evm.model.Ug_unitig_0.196, evm.model.Ug_unitig_0.240, evm.model.Ug_unitig_0.2430, evm.model.Ug_unitig_0.2532, evm.model.Ug_unitig_0.456, evm.model.…
GO:0048367	BP	p	2.62e-05	146	5.97205	4	28/2488	481/17760	shoot system development	2.66e-06	28	evm.model.Ug_unitig_0.1026, evm.model.Ug_unitig_0.1441, evm.model.Ug_unitig_0.1926, evm.model.Ug_unitig_0.1950, evm.model.Ug_unitig_0.843, evm.model.Ug_unitig_22.1003, evm.model.Ug_unitig_26.115, evm.model.Ug_unitig_26.1252, evm.model.Ug_unitig_26.1277, evm.model.Ug_unitig_26.919, evm.model.Ug_unitig_27.462, evm.model.Ug_unitig_32.262, evm.model.Ug_unitig_52.213, evm.model.Ug_unitig_578.595, evm.…
GO:0016043	BP	e	2.62e-05	3363	4.19144	2	496/2488	2854/17760	cellular component organization	7.53e-06	496	evm.model.Ug_unitig_0.1, evm.model.Ug_unitig_0.1035, evm.model.Ug_unitig_0.1063, evm.model.Ug_unitig_0.1146, evm.model.Ug_unitig_0.1224, evm.model.Ug_unitig_0.1279, evm.model.Ug_unitig_0.1320, evm.model.Ug_unitig_0.1351, evm.model.Ug_unitig_0.1422, evm.model.Ug_unitig_0.1441, evm.model.Ug_unitig_0.1615, evm.model.Ug_unitig_0.1718, evm.model.Ug_unitig_0.1926, evm.model.Ug_unitig_0.195, evm.model.U…
GO:0042221	BP	p	2.62e-05	2467	4.14891	2	243/2488	2978/17760	response to chemical	8.17e-06	243	evm.model.Ug_unitig_0.1026, evm.model.Ug_unitig_0.1035, evm.model.Ug_unitig_0.1091, evm.model.Ug_unitig_0.1305, evm.model.Ug_unitig_0.1353, evm.model.Ug_unitig_0.140, evm.model.Ug_unitig_0.141, evm.model.Ug_unitig_0.1813, evm.model.Ug_unitig_0.1955, evm.model.Ug_unitig_0.2139, evm.model.Ug_unitig_0.2231, evm.model.Ug_unitig_0.2337, evm.model.Ug_unitig_0.2471, evm.model.Ug_unitig_0.2531, evm.model…
GO:0090304	BP	e	2.62e-05	1714	5.79877	5	172/2488	572/17760	nucleic acid metabolic process	2.87e-06	172	evm.model.Ug_unitig_0.1, evm.model.Ug_unitig_0.1006, evm.model.Ug_unitig_0.1100, evm.model.Ug_unitig_0.1279, evm.model.Ug_unitig_0.1718, evm.model.Ug_unitig_0.2238, evm.model.Ug_unitig_0.275, evm.model.Ug_unitig_0.398, evm.model.Ug_unitig_0.456, evm.model.Ug_unitig_0.558, evm.model.Ug_unitig_0.641, evm.model.Ug_unitig_21.153, evm.model.Ug_unitig_21.171, evm.model.Ug_unitig_21.234, evm.model.Ug_un…
GO:0030154	BP	p	2.62e-05	2428	5.52252	3	50/2488	754/17760	cell differentiation	3.65e-06	50	evm.model.Ug_unitig_0.1320, evm.model.Ug_unitig_0.2231, evm.model.Ug_unitig_0.229, evm.model.Ug_unitig_0.2412, evm.model.Ug_unitig_0.927, evm.model.Ug_unitig_21.110, evm.model.Ug_unitig_21.251, evm.model.Ug_unitig_21.595, evm.model.Ug_unitig_21.604, evm.model.Ug_unitig_21.671, evm.model.Ug_unitig_21.744, evm.model.Ug_unitig_22.1000, evm.model.Ug_unitig_22.1119, evm.model.Ug_unitig_22.1120, evm.mo…
GO:0007165	BP	p	2.62e-05	1750	4.7565	4	129/2488	1622/17760	signal transduction	5.38e-06	129	evm.model.Ug_unitig_0.1122, evm.model.Ug_unitig_0.1355, evm.model.Ug_unitig_0.2231, evm.model.Ug_unitig_0.2250, evm.model.Ug_unitig_0.2337, evm.model.Ug_unitig_0.244, evm.model.Ug_unitig_0.2531, evm.model.Ug_unitig_0.309, evm.model.Ug_unitig_0.575, evm.model.Ug_unitig_0.602, evm.model.Ug_unitig_0.641, evm.model.Ug_unitig_0.661, evm.model.Ug_unitig_0.662, evm.model.Ug_unitig_0.669, evm.model.Ug_un…
GO:0009605	BP	p	2.62e-05	1564	4.91807	2	132/2488	1380/17760	response to external stimulus	4.80e-06	132	evm.model.Ug_unitig_0.1026, evm.model.Ug_unitig_0.1076, evm.model.Ug_unitig_0.1320, evm.model.Ug_unitig_0.1353, evm.model.Ug_unitig_0.195, evm.model.Ug_unitig_0.217, evm.model.Ug_unitig_0.2329, evm.model.Ug_unitig_0.600, evm.model.Ug_unitig_0.602, evm.model.Ug_unitig_0.641, evm.model.Ug_unitig_0.651, evm.model.Ug_unitig_0.713, evm.model.Ug_unitig_0.843, evm.model.Ug_unitig_0.927, evm.model.Ug_uni…
GO:0003006	BP	p	2.62e-05	733	5.94336	2	28/2488	495/17760	developmental process involved in reproduction	3.68e-06	28	evm.model.Ug_unitig_0.1026, evm.model.Ug_unitig_0.1441, evm.model.Ug_unitig_0.1926, evm.model.Ug_unitig_0.1950, evm.model.Ug_unitig_0.843, evm.model.Ug_unitig_22.1003, evm.model.Ug_unitig_26.115, evm.model.Ug_unitig_26.1252, evm.model.Ug_unitig_26.1277, evm.model.Ug_unitig_26.919, evm.model.Ug_unitig_27.462, evm.model.Ug_unitig_32.262, evm.model.Ug_unitig_52.213, evm.model.Ug_unitig_578.595, evm.…
GO:0048608	BP	p	2.62e-05	413	5.97205	3	28/2488	481/17760	reproductive structure development	2.66e-06	28	evm.model.Ug_unitig_0.1026, evm.model.Ug_unitig_0.1441, evm.model.Ug_unitig_0.1926, evm.model.Ug_unitig_0.1950, evm.model.Ug_unitig_0.843, evm.model.Ug_unitig_22.1003, evm.model.Ug_unitig_26.115, evm.model.Ug_unitig_26.1252, evm.model.Ug_unitig_26.1277, evm.model.Ug_unitig_26.919, evm.model.Ug_unitig_27.462, evm.model.Ug_unitig_32.262, evm.model.Ug_unitig_52.213, evm.model.Ug_unitig_578.595, evm.…
GO:0090567	BP	p	2.62e-05	95	5.97205	5	28/2488	481/17760	reproductive shoot system development	2.66e-06	28	evm.model.Ug_unitig_0.1026, evm.model.Ug_unitig_0.1441, evm.model.Ug_unitig_0.1926, evm.model.Ug_unitig_0.1950, evm.model.Ug_unitig_0.843, evm.model.Ug_unitig_22.1003, evm.model.Ug_unitig_26.115, evm.model.Ug_unitig_26.1252, evm.model.Ug_unitig_26.1277, evm.model.Ug_unitig_26.919, evm.model.Ug_unitig_27.462, evm.model.Ug_unitig_32.262, evm.model.Ug_unitig_52.213, evm.model.Ug_unitig_578.595, evm.…
GO:0007049	BP	e	2.62e-05	937	5.66787	2	142/2488	652/17760	cell cycle	3.80e-06	142	evm.model.Ug_unitig_0.1100, evm.model.Ug_unitig_0.1615, evm.model.Ug_unitig_0.1718, evm.model.Ug_unitig_0.1984, evm.model.Ug_unitig_0.2218, evm.model.Ug_unitig_0.2320, evm.model.Ug_unitig_0.2334, evm.model.Ug_unitig_0.275, evm.model.Ug_unitig_0.485, evm.model.Ug_unitig_0.641, evm.model.Ug_unitig_0.661, evm.model.Ug_unitig_0.662, evm.model.Ug_unitig_0.846, evm.model.Ug_unitig_21.154, evm.model.Ug_…
GO:0009607	BP	p	2.62e-05	859	5.27475	2	80/2488	966/17760	response to biotic stimulus	4.43e-06	80	evm.model.Ug_unitig_0.1076, evm.model.Ug_unitig_0.195, evm.model.Ug_unitig_0.217, evm.model.Ug_unitig_0.2329, evm.model.Ug_unitig_0.600, evm.model.Ug_unitig_0.641, evm.model.Ug_unitig_0.651, evm.model.Ug_unitig_0.843, evm.model.Ug_unitig_21.209, evm.model.Ug_unitig_21.435, evm.model.Ug_unitig_21.665, evm.model.Ug_unitig_21.853, evm.model.Ug_unitig_22.387, evm.model.Ug_unitig_26.115, evm.model.Ug_…
GO:0009719	BP	p	2.62e-05	564	4.71721	2	121/2488	1687/17760	response to endogenous stimulus	5.54e-06	121	evm.model.Ug_unitig_0.1091, evm.model.Ug_unitig_0.1813, evm.model.Ug_unitig_0.1955, evm.model.Ug_unitig_0.2139, evm.model.Ug_unitig_0.2231, evm.model.Ug_unitig_0.2337, evm.model.Ug_unitig_0.2471, evm.model.Ug_unitig_0.2531, evm.model.Ug_unitig_0.309, evm.model.Ug_unitig_0.468, evm.model.Ug_unitig_0.575, evm.model.Ug_unitig_0.600, evm.model.Ug_unitig_0.641, evm.model.Ug_unitig_21.403, evm.model.Ug…
GO:0006259	BP	e	2.62e-05	519	5.79877	6	172/2488	572/17760	DNA metabolic process	2.87e-06	172	evm.model.Ug_unitig_0.1, evm.model.Ug_unitig_0.1006, evm.model.Ug_unitig_0.1100, evm.model.Ug_unitig_0.1279, evm.model.Ug_unitig_0.1718, evm.model.Ug_unitig_0.2238, evm.model.Ug_unitig_0.275, evm.model.Ug_unitig_0.398, evm.model.Ug_unitig_0.456, evm.model.Ug_unitig_0.558, evm.model.Ug_unitig_0.641, evm.model.Ug_unitig_21.153, evm.model.Ug_unitig_21.171, evm.model.Ug_unitig_21.234, evm.model.Ug_un…
GO:0040007	BP	p	2.62e-05	432	5.62435	1	57/2488	681/17760	growth	7.99e-06	57	evm.model.Ug_unitig_0.1087, evm.model.Ug_unitig_0.1224, evm.model.Ug_unitig_0.1279, evm.model.Ug_unitig_0.1441, evm.model.Ug_unitig_0.229, evm.model.Ug_unitig_0.957, evm.model.Ug_unitig_21.110, evm.model.Ug_unitig_21.170, evm.model.Ug_unitig_21.807, evm.model.Ug_unitig_22.1000, evm.model.Ug_unitig_22.1188, evm.model.Ug_unitig_22.143, evm.model.Ug_unitig_22.516, evm.model.Ug_unitig_22.638, evm.mod…
GO:0009628	BP	p	2.62e-05	393	4.51261	2	193/2488	2070/17760	response to abiotic stimulus	6.16e-06	193	evm.model.Ug_unitig_0.1063, evm.model.Ug_unitig_0.1091, evm.model.Ug_unitig_0.1100, evm.model.Ug_unitig_0.1320, evm.model.Ug_unitig_0.1441, evm.model.Ug_unitig_0.1767, evm.model.Ug_unitig_0.1813, evm.model.Ug_unitig_0.1926, evm.model.Ug_unitig_0.1938, evm.model.Ug_unitig_0.1955, evm.model.Ug_unitig_0.2471, evm.model.Ug_unitig_0.398, evm.model.Ug_unitig_0.454, evm.model.Ug_unitig_0.575, evm.model.…
GO:0016049	BP	p	2.62e-05	118	5.95351	2	34/2488	490/17760	cell growth	3.33e-06	34	evm.model.Ug_unitig_0.1224, evm.model.Ug_unitig_0.1441, evm.model.Ug_unitig_0.229, evm.model.Ug_unitig_21.110, evm.model.Ug_unitig_22.1000, evm.model.Ug_unitig_22.516, evm.model.Ug_unitig_22.638, evm.model.Ug_unitig_22.663, evm.model.Ug_unitig_26.216, evm.model.Ug_unitig_27.123, evm.model.Ug_unitig_27.419, evm.model.Ug_unitig_37.615, evm.model.Ug_unitig_37.731, evm.model.Ug_unitig_46.361, evm.mod…
GO:0009908	BP	p	2.62e-05	88	5.97205	6	28/2488	481/17760	flower development	2.66e-06	28	evm.model.Ug_unitig_0.1026, evm.model.Ug_unitig_0.1441, evm.model.Ug_unitig_0.1926, evm.model.Ug_unitig_0.1950, evm.model.Ug_unitig_0.843, evm.model.Ug_unitig_22.1003, evm.model.Ug_unitig_26.115, evm.model.Ug_unitig_26.1252, evm.model.Ug_unitig_26.1277, evm.model.Ug_unitig_26.919, evm.model.Ug_unitig_27.462, evm.model.Ug_unitig_32.262, evm.model.Ug_unitig_52.213, evm.model.Ug_unitig_578.595, evm.…
GO:0003824	MF	p	2.77e-05	7519	2.26795	1	1117/2488	8747/17760	catalytic activity	1.24e-05	1117	evm.model.Ug_unitig_0.1, evm.model.Ug_unitig_0.1006, evm.model.Ug_unitig_0.1026, evm.model.Ug_unitig_0.1041, evm.model.Ug_unitig_0.1052, evm.model.Ug_unitig_0.1055, evm.model.Ug_unitig_0.1071, evm.model.Ug_unitig_0.1082, evm.model.Ug_unitig_0.1093, evm.model.Ug_unitig_0.1122, evm.model.Ug_unitig_0.1139, evm.model.Ug_unitig_0.117, evm.model.Ug_unitig_0.119, evm.model.Ug_unitig_0.1203, evm.model.Ug…
GO:0005730	CC	e	2.90e-05	26	5.08892	5	110/2488	526/17760	nucleolus	1.29e-05	110	evm.model.Ug_unitig_0.1035, evm.model.Ug_unitig_0.1099, evm.model.Ug_unitig_0.11, evm.model.Ug_unitig_0.1108, evm.model.Ug_unitig_0.115, evm.model.Ug_unitig_0.1422, evm.model.Ug_unitig_0.1491, evm.model.Ug_unitig_0.1600, evm.model.Ug_unitig_0.2143, evm.model.Ug_unitig_0.2178, evm.model.Ug_unitig_0.2194, evm.model.Ug_unitig_0.2357, evm.model.Ug_unitig_0.599, evm.model.Ug_unitig_0.728, evm.model.Ug…
GO:0050896	BP	p	2.94e-05	5954	3.66676	1	517/2488	4823/17760	response to stimulus	9.59e-06	517	evm.model.Ug_unitig_0.1, evm.model.Ug_unitig_0.1006, evm.model.Ug_unitig_0.1026, evm.model.Ug_unitig_0.1035, evm.model.Ug_unitig_0.1063, evm.model.Ug_unitig_0.1076, evm.model.Ug_unitig_0.1091, evm.model.Ug_unitig_0.1100, evm.model.Ug_unitig_0.1122, evm.model.Ug_unitig_0.1305, evm.model.Ug_unitig_0.1320, evm.model.Ug_unitig_0.1327, evm.model.Ug_unitig_0.1353, evm.model.Ug_unitig_0.140, evm.model.U…
GO:0022414	BP	p	4.36e-05	1244	5.63024	1	58/2488	677/17760	reproductive process	1.64e-05	58	evm.model.Ug_unitig_0.1026, evm.model.Ug_unitig_0.1441, evm.model.Ug_unitig_0.1457, evm.model.Ug_unitig_0.1926, evm.model.Ug_unitig_0.1950, evm.model.Ug_unitig_0.229, evm.model.Ug_unitig_0.843, evm.model.Ug_unitig_0.927, evm.model.Ug_unitig_21.290, evm.model.Ug_unitig_22.1000, evm.model.Ug_unitig_22.1003, evm.model.Ug_unitig_22.140, evm.model.Ug_unitig_26.115, evm.model.Ug_unitig_26.1252, evm.mod…
GO:0031967	CC	e	6.76e-05	137	6.54204	4	35/2488	123/17760	organelle envelope	3.45e-05	35	evm.model.Ug_unitig_0.217, evm.model.Ug_unitig_21.489, evm.model.Ug_unitig_21.490, evm.model.Ug_unitig_22.1118, evm.model.Ug_unitig_22.1133, evm.model.Ug_unitig_22.236, evm.model.Ug_unitig_22.387, evm.model.Ug_unitig_22.645, evm.model.Ug_unitig_22.646, evm.model.Ug_unitig_26.185, evm.model.Ug_unitig_26.274, evm.model.Ug_unitig_26.93, evm.model.Ug_unitig_27.383, evm.model.Ug_unitig_27.392, evm.mod…
GO:0005635	CC	e	6.76e-05	30	6.54204	5	35/2488	123/17760	nuclear envelope	3.45e-05	35	evm.model.Ug_unitig_0.217, evm.model.Ug_unitig_21.489, evm.model.Ug_unitig_21.490, evm.model.Ug_unitig_22.1118, evm.model.Ug_unitig_22.1133, evm.model.Ug_unitig_22.236, evm.model.Ug_unitig_22.387, evm.model.Ug_unitig_22.645, evm.model.Ug_unitig_22.646, evm.model.Ug_unitig_26.185, evm.model.Ug_unitig_26.274, evm.model.Ug_unitig_26.93, evm.model.Ug_unitig_27.383, evm.model.Ug_unitig_27.392, evm.mod…
GO:0009579	CC	e	8.19e-05	62	5.14967	3	102/2488	495/17760	thylakoid	4.36e-05	102	evm.model.Ug_unitig_0.1063, evm.model.Ug_unitig_0.1203, evm.model.Ug_unitig_0.160, evm.model.Ug_unitig_0.1735, evm.model.Ug_unitig_0.1770, evm.model.Ug_unitig_0.1939, evm.model.Ug_unitig_0.195, evm.model.Ug_unitig_0.1953, evm.model.Ug_unitig_0.710, evm.model.Ug_unitig_0.728, evm.model.Ug_unitig_0.905, evm.model.Ug_unitig_21.4, evm.model.Ug_unitig_21.584, evm.model.Ug_unitig_21.803, evm.model.Ug_u…
GO:0030246	MF	p	8.64e-05	47	5.97377	2	11/2488	215/17760	carbohydrate binding	4.10e-05	11	evm.model.Ug_unitig_0.634, evm.model.Ug_unitig_22.1372, evm.model.Ug_unitig_32.361, evm.model.Ug_unitig_37.142, evm.model.Ug_unitig_37.38, evm.model.Ug_unitig_37.698, evm.model.Ug_unitig_37.747, evm.model.Ug_unitig_52.217, evm.model.Ug_unitig_60.134, evm.model.Ug_unitig_744.665, evm.model.Ug_unitig_748.98
GO:0006950	BP	p	1.09e-04	1602	4.18829	2	332/2488	2863/17760	response to stress	4.32e-05	332	evm.model.Ug_unitig_0.1, evm.model.Ug_unitig_0.1006, evm.model.Ug_unitig_0.1063, evm.model.Ug_unitig_0.1076, evm.model.Ug_unitig_0.1091, evm.model.Ug_unitig_0.1100, evm.model.Ug_unitig_0.1122, evm.model.Ug_unitig_0.1305, evm.model.Ug_unitig_0.1327, evm.model.Ug_unitig_0.1353, evm.model.Ug_unitig_0.1441, evm.model.Ug_unitig_0.1718, evm.model.Ug_unitig_0.1813, evm.model.Ug_unitig_0.1926, evm.model.…
GO:0051179	BP	p	3.07e-04	4383	4.32227	1	290/2488	2504/17760	localization	1.31e-04	290	evm.model.Ug_unitig_0.1064, evm.model.Ug_unitig_0.1146, evm.model.Ug_unitig_0.1157, evm.model.Ug_unitig_0.1195, evm.model.Ug_unitig_0.1305, evm.model.Ug_unitig_0.1320, evm.model.Ug_unitig_0.1818, evm.model.Ug_unitig_0.1898, evm.model.Ug_unitig_0.1950, evm.model.Ug_unitig_0.1984, evm.model.Ug_unitig_0.2097, evm.model.Ug_unitig_0.213, evm.model.Ug_unitig_0.2160, evm.model.Ug_unitig_0.217, evm.model…
GO:0051234	BP	p	3.07e-04	3139	4.32227	2	290/2488	2504/17760	establishment of localization	1.31e-04	290	evm.model.Ug_unitig_0.1064, evm.model.Ug_unitig_0.1146, evm.model.Ug_unitig_0.1157, evm.model.Ug_unitig_0.1195, evm.model.Ug_unitig_0.1305, evm.model.Ug_unitig_0.1320, evm.model.Ug_unitig_0.1818, evm.model.Ug_unitig_0.1898, evm.model.Ug_unitig_0.1950, evm.model.Ug_unitig_0.1984, evm.model.Ug_unitig_0.2097, evm.model.Ug_unitig_0.213, evm.model.Ug_unitig_0.2160, evm.model.Ug_unitig_0.217, evm.model…
GO:0006810	BP	p	3.07e-04	3012	4.32227	3	290/2488	2504/17760	transport	1.31e-04	290	evm.model.Ug_unitig_0.1064, evm.model.Ug_unitig_0.1146, evm.model.Ug_unitig_0.1157, evm.model.Ug_unitig_0.1195, evm.model.Ug_unitig_0.1305, evm.model.Ug_unitig_0.1320, evm.model.Ug_unitig_0.1818, evm.model.Ug_unitig_0.1898, evm.model.Ug_unitig_0.1950, evm.model.Ug_unitig_0.1984, evm.model.Ug_unitig_0.2097, evm.model.Ug_unitig_0.213, evm.model.Ug_unitig_0.2160, evm.model.Ug_unitig_0.217, evm.model…
GO:0043228	CC	e	5.57e-04	629	4.29032	2	206/2488	1169/17760	non-membrane-bounded organelle	3.44e-04	206	evm.model.Ug_unitig_0.1035, evm.model.Ug_unitig_0.1099, evm.model.Ug_unitig_0.11, evm.model.Ug_unitig_0.1108, evm.model.Ug_unitig_0.115, evm.model.Ug_unitig_0.1224, evm.model.Ug_unitig_0.1260, evm.model.Ug_unitig_0.1422, evm.model.Ug_unitig_0.1478, evm.model.Ug_unitig_0.1491, evm.model.Ug_unitig_0.1600, evm.model.Ug_unitig_0.1615, evm.model.Ug_unitig_0.1898, evm.model.Ug_unitig_0.1942, evm.model.…
GO:0043232	CC	e	5.57e-04	601	4.29032	4	206/2488	1169/17760	intracellular non-membrane-bounded organelle	3.44e-04	206	evm.model.Ug_unitig_0.1035, evm.model.Ug_unitig_0.1099, evm.model.Ug_unitig_0.11, evm.model.Ug_unitig_0.1108, evm.model.Ug_unitig_0.115, evm.model.Ug_unitig_0.1224, evm.model.Ug_unitig_0.1260, evm.model.Ug_unitig_0.1422, evm.model.Ug_unitig_0.1478, evm.model.Ug_unitig_0.1491, evm.model.Ug_unitig_0.1600, evm.model.Ug_unitig_0.1615, evm.model.Ug_unitig_0.1898, evm.model.Ug_unitig_0.1942, evm.model.…
GO:0016787	MF	p	1.90e-03	1490	3.21819	2	414/2488	3382/17760	hydrolase activity	9.49e-04	414	evm.model.Ug_unitig_0.1122, evm.model.Ug_unitig_0.1139, evm.model.Ug_unitig_0.1326, evm.model.Ug_unitig_0.1351, evm.model.Ug_unitig_0.1353, evm.model.Ug_unitig_0.1355, evm.model.Ug_unitig_0.1391, evm.model.Ug_unitig_0.1396, evm.model.Ug_unitig_0.1414, evm.model.Ug_unitig_0.1441, evm.model.Ug_unitig_0.1500, evm.model.Ug_unitig_0.1615, evm.model.Ug_unitig_0.168, evm.model.Ug_unitig_0.17, evm.model.…
GO:0031982	CC	e	2.07e-03	306	6.04102	3	45/2488	203/17760	vesicle	1.50e-03	45	evm.model.Ug_unitig_0.1320, evm.model.Ug_unitig_0.1984, evm.model.Ug_unitig_0.2532, evm.model.Ug_unitig_0.714, evm.model.Ug_unitig_0.839, evm.model.Ug_unitig_0.932, evm.model.Ug_unitig_21.509, evm.model.Ug_unitig_21.861, evm.model.Ug_unitig_22.1313, evm.model.Ug_unitig_22.538, evm.model.Ug_unitig_26.1114, evm.model.Ug_unitig_26.350, evm.model.Ug_unitig_26.374, evm.model.Ug_unitig_26.77, evm.model…
GO:0097708	CC	e	2.07e-03	293	6.04102	4	45/2488	203/17760	intracellular vesicle	1.50e-03	45	evm.model.Ug_unitig_0.1320, evm.model.Ug_unitig_0.1984, evm.model.Ug_unitig_0.2532, evm.model.Ug_unitig_0.714, evm.model.Ug_unitig_0.839, evm.model.Ug_unitig_0.932, evm.model.Ug_unitig_21.509, evm.model.Ug_unitig_21.861, evm.model.Ug_unitig_22.1313, evm.model.Ug_unitig_22.538, evm.model.Ug_unitig_26.1114, evm.model.Ug_unitig_26.350, evm.model.Ug_unitig_26.374, evm.model.Ug_unitig_26.77, evm.model…
GO:0065008	BP	p	2.86e-03	1946	6.29284	2	29/2488	349/17760	regulation of biological quality	1.34e-03	29	evm.model.Ug_unitig_0.1195, evm.model.Ug_unitig_0.669, evm.model.Ug_unitig_0.713, evm.model.Ug_unitig_0.900, evm.model.Ug_unitig_0.927, evm.model.Ug_unitig_21.515, evm.model.Ug_unitig_22.501, evm.model.Ug_unitig_22.633, evm.model.Ug_unitig_26.1055, evm.model.Ug_unitig_26.1196, evm.model.Ug_unitig_27.109, evm.model.Ug_unitig_27.419, evm.model.Ug_unitig_37.552, evm.model.Ug_unitig_46.13, evm.model.…
GO:0042592	BP	p	2.86e-03	480	6.29284	3	29/2488	349/17760	homeostatic process	1.34e-03	29	evm.model.Ug_unitig_0.1195, evm.model.Ug_unitig_0.669, evm.model.Ug_unitig_0.713, evm.model.Ug_unitig_0.900, evm.model.Ug_unitig_0.927, evm.model.Ug_unitig_21.515, evm.model.Ug_unitig_22.501, evm.model.Ug_unitig_22.633, evm.model.Ug_unitig_26.1055, evm.model.Ug_unitig_26.1196, evm.model.Ug_unitig_27.109, evm.model.Ug_unitig_27.419, evm.model.Ug_unitig_37.552, evm.model.Ug_unitig_46.13, evm.model.…
GO:0019725	BP	p	2.86e-03	193	6.29284	4	29/2488	349/17760	cellular homeostasis	1.34e-03	29	evm.model.Ug_unitig_0.1195, evm.model.Ug_unitig_0.669, evm.model.Ug_unitig_0.713, evm.model.Ug_unitig_0.900, evm.model.Ug_unitig_0.927, evm.model.Ug_unitig_21.515, evm.model.Ug_unitig_22.501, evm.model.Ug_unitig_22.633, evm.model.Ug_unitig_26.1055, evm.model.Ug_unitig_26.1196, evm.model.Ug_unitig_27.109, evm.model.Ug_unitig_27.419, evm.model.Ug_unitig_37.552, evm.model.Ug_unitig_46.13, evm.model.…
GO:0016817	MF	p	4.17e-03	159	6.89006	3	3/2488	86/17760	hydrolase activity, acting on acid anhydrides	2.61e-03	3	evm.model.Ug_unitig_22.140, evm.model.Ug_unitig_37.311, evm.model.Ug_unitig_747.697
GO:0016818	MF	p	4.17e-03	155	6.89006	4	3/2488	86/17760	hydrolase activity, acting on acid anhydrides, in phosphorus-containing anhydrides	2.61e-03	3	evm.model.Ug_unitig_22.140, evm.model.Ug_unitig_37.311, evm.model.Ug_unitig_747.697
GO:0016462	MF	p	4.17e-03	138	6.89006	5	3/2488	86/17760	pyrophosphatase activity	2.61e-03	3	evm.model.Ug_unitig_22.140, evm.model.Ug_unitig_37.311, evm.model.Ug_unitig_747.697
GO:0017111	MF	p	4.17e-03	61	6.89006	6	3/2488	86/17760	nucleoside-triphosphatase activity	2.61e-03	3	evm.model.Ug_unitig_22.140, evm.model.Ug_unitig_37.311, evm.model.Ug_unitig_747.697
GO:0003774	MF	p	4.17e-03	9	6.89006	7	3/2488	86/17760	motor activity	2.61e-03	3	evm.model.Ug_unitig_22.140, evm.model.Ug_unitig_37.311, evm.model.Ug_unitig_747.697
GO:0016740	MF	p	6.63e-03	2462	3.08314	2	488/2488	3871/17760	transferase activity	4.31e-03	488	evm.model.Ug_unitig_0.1, evm.model.Ug_unitig_0.1006, evm.model.Ug_unitig_0.1026, evm.model.Ug_unitig_0.1041, evm.model.Ug_unitig_0.1093, evm.model.Ug_unitig_0.1139, evm.model.Ug_unitig_0.117, evm.model.Ug_unitig_0.119, evm.model.Ug_unitig_0.1203, evm.model.Ug_unitig_0.1260, evm.model.Ug_unitig_0.1279, evm.model.Ug_unitig_0.1287, evm.model.Ug_unitig_0.1327, evm.model.Ug_unitig_0.1351, evm.model.Ug…
GO:0048511	BP	p	7.49e-03	84	7.09806	1	10/2488	156/17760	rhythmic process	3.67e-03	10	evm.model.Ug_unitig_21.604, evm.model.Ug_unitig_21.853, evm.model.Ug_unitig_32.204, evm.model.Ug_unitig_37.945, evm.model.Ug_unitig_46.745, evm.model.Ug_unitig_578.949, evm.model.Ug_unitig_744.193, evm.model.Ug_unitig_744.263, evm.model.Ug_unitig_748.858, evm.model.Ug_unitig_899.940
GO:0007623	BP	p	7.49e-03	41	7.09806	2	10/2488	156/17760	circadian rhythm	3.67e-03	10	evm.model.Ug_unitig_21.604, evm.model.Ug_unitig_21.853, evm.model.Ug_unitig_32.204, evm.model.Ug_unitig_37.945, evm.model.Ug_unitig_46.745, evm.model.Ug_unitig_578.949, evm.model.Ug_unitig_744.193, evm.model.Ug_unitig_744.263, evm.model.Ug_unitig_748.858, evm.model.Ug_unitig_899.940
GO:0015979	BP	e	8.34e-03	38	6.76342	3	46/2488	218/17760	photosynthesis	4.17e-03	46	evm.model.Ug_unitig_0.1063, evm.model.Ug_unitig_0.1939, evm.model.Ug_unitig_0.1953, evm.model.Ug_unitig_0.556, evm.model.Ug_unitig_0.710, evm.model.Ug_unitig_0.905, evm.model.Ug_unitig_21.4, evm.model.Ug_unitig_22.597, evm.model.Ug_unitig_26.156, evm.model.Ug_unitig_26.731, evm.model.Ug_unitig_27.109, evm.model.Ug_unitig_27.188, evm.model.Ug_unitig_27.333, evm.model.Ug_unitig_32.162, evm.model.Ug…
GO:0023052	BP	p	1.25e-02	2291	7.97353	1	2/2488	65/17760	signaling	6.48e-03	2	evm.model.Ug_unitig_21.491, evm.model.Ug_unitig_46.498
GO:0007267	BP	p	1.25e-02	657	7.97353	3	2/2488	65/17760	cell-cell signaling	6.48e-03	2	evm.model.Ug_unitig_21.491, evm.model.Ug_unitig_46.498
GO:0008144	MF	e	1.40e-02	59	9.95812	2	3/2488	4/17760	drug binding	9.83e-03	3	evm.model.Ug_unitig_0.2471, evm.model.Ug_unitig_0.60, evm.model.Ug_unitig_578.91
GO:0019825	MF	e	1.40e-02	1	9.95812	3	3/2488	4/17760	oxygen binding	9.83e-03	3	evm.model.Ug_unitig_0.2471, evm.model.Ug_unitig_0.60, evm.model.Ug_unitig_578.91
GO:0098772	MF	p	1.58e-02	227	5.44178	1	35/2488	366/17760	molecular function regulator	1.19e-02	35	evm.model.Ug_unitig_0.2261, evm.model.Ug_unitig_0.2337, evm.model.Ug_unitig_0.26, evm.model.Ug_unitig_22.1440, evm.model.Ug_unitig_22.187, evm.model.Ug_unitig_26.1238, evm.model.Ug_unitig_26.975, evm.model.Ug_unitig_26.976, evm.model.Ug_unitig_27.311, evm.model.Ug_unitig_32.233, evm.model.Ug_unitig_32.303, evm.model.Ug_unitig_32.552, evm.model.Ug_unitig_32.692, evm.model.Ug_unitig_37.347, evm.mod…
GO:0030234	MF	p	1.58e-02	152	5.44178	2	35/2488	366/17760	enzyme regulator activity	1.19e-02	35	evm.model.Ug_unitig_0.2261, evm.model.Ug_unitig_0.2337, evm.model.Ug_unitig_0.26, evm.model.Ug_unitig_22.1440, evm.model.Ug_unitig_22.187, evm.model.Ug_unitig_26.1238, evm.model.Ug_unitig_26.975, evm.model.Ug_unitig_26.976, evm.model.Ug_unitig_27.311, evm.model.Ug_unitig_32.233, evm.model.Ug_unitig_32.303, evm.model.Ug_unitig_32.552, evm.model.Ug_unitig_32.692, evm.model.Ug_unitig_37.347, evm.mod…
GO:0008289	MF	p	2.27e-02	96	5.73494	2	25/2488	273/17760	lipid binding	1.76e-02	25	evm.model.Ug_unitig_0.1052, evm.model.Ug_unitig_0.1813, evm.model.Ug_unitig_21.828, evm.model.Ug_unitig_22.1133, evm.model.Ug_unitig_22.1186, evm.model.Ug_unitig_26.704, evm.model.Ug_unitig_26.779, evm.model.Ug_unitig_26.853, evm.model.Ug_unitig_26.93, evm.model.Ug_unitig_27.543, evm.model.Ug_unitig_32.696, evm.model.Ug_unitig_46.686, evm.model.Ug_unitig_578.341, evm.model.Ug_unitig_62.206, evm.m…
GO:0005794	CC	p	2.37e-02	45	5.15371	5	51/2488	493/17760	Golgi apparatus	1.76e-02	51	evm.model.Ug_unitig_0.1091, evm.model.Ug_unitig_0.1146, evm.model.Ug_unitig_0.1984, evm.model.Ug_unitig_0.2097, evm.model.Ug_unitig_0.213, evm.model.Ug_unitig_0.714, evm.model.Ug_unitig_0.735, evm.model.Ug_unitig_0.839, evm.model.Ug_unitig_0.900, evm.model.Ug_unitig_21.154, evm.model.Ug_unitig_21.170, evm.model.Ug_unitig_21.223, evm.model.Ug_unitig_22.1313, evm.model.Ug_unitig_32.424, evm.model.U…
GO:0009790	BP	e	2.48e-02	649	6.07027	4	79/2488	436/17760	embryo development	1.44e-02	79	evm.model.Ug_unitig_0.1006, evm.model.Ug_unitig_0.1252, evm.model.Ug_unitig_0.1320, evm.model.Ug_unitig_0.1930, evm.model.Ug_unitig_0.240, evm.model.Ug_unitig_0.2532, evm.model.Ug_unitig_0.456, evm.model.Ug_unitig_0.471, evm.model.Ug_unitig_0.79, evm.model.Ug_unitig_0.85, evm.model.Ug_unitig_0.957, evm.model.Ug_unitig_21.110, evm.model.Ug_unitig_21.154, evm.model.Ug_unitig_21.595, evm.model.Ug_un…
GO:0009838	BP	p	2.86e-02	18	8.71393	2	0/2488	31/17760	abscission	1.69e-02	0
GO:0005622	CC	p	3.61e-02	2386	4.88963	2	71/2488	642/17760	intracellular	2.77e-02	71	evm.model.Ug_unitig_0.1216, evm.model.Ug_unitig_0.1414, evm.model.Ug_unitig_0.2235, evm.model.Ug_unitig_0.2334, evm.model.Ug_unitig_0.26, evm.model.Ug_unitig_0.328, evm.model.Ug_unitig_0.398, evm.model.Ug_unitig_0.456, evm.model.Ug_unitig_21.234, evm.model.Ug_unitig_21.892, evm.model.Ug_unitig_22.1028, evm.model.Ug_unitig_22.1188, evm.model.Ug_unitig_22.161, evm.model.Ug_unitig_22.359, evm.model.…
GO:0009058	BP	p	3.62e-02	3649	3.64462	2	643/2488	4931/17760	biosynthetic process	2.18e-02	643	evm.model.Ug_unitig_0.1, evm.model.Ug_unitig_0.1006, evm.model.Ug_unitig_0.1041, evm.model.Ug_unitig_0.1093, evm.model.Ug_unitig_0.1099, evm.model.Ug_unitig_0.1122, evm.model.Ug_unitig_0.1216, evm.model.Ug_unitig_0.1252, evm.model.Ug_unitig_0.1260, evm.model.Ug_unitig_0.1279, evm.model.Ug_unitig_0.1287, evm.model.Ug_unitig_0.1326, evm.model.Ug_unitig_0.1330, evm.model.Ug_unitig_0.1353, evm.model.…
GO:0040029	BP	e	3.64e-02	126	6.95496	6	36/2488	180/17760	regulation of gene expression, epigenetic	2.34e-02	36	evm.model.Ug_unitig_0.1108, evm.model.Ug_unitig_0.1441, evm.model.Ug_unitig_0.453, evm.model.Ug_unitig_0.641, evm.model.Ug_unitig_0.843, evm.model.Ug_unitig_21.280, evm.model.Ug_unitig_21.489, evm.model.Ug_unitig_21.490, evm.model.Ug_unitig_21.595, evm.model.Ug_unitig_26.351, evm.model.Ug_unitig_26.910, evm.model.Ug_unitig_32.262, evm.model.Ug_unitig_32.391, evm.model.Ug_unitig_37.1071, evm.model…
GO:0006139	BP	e	4.70e-02	2463	3.84714	4	606/2488	4027/17760	nucleobase-containing compound metabolic process	3.21e-02	606	evm.model.Ug_unitig_0.1, evm.model.Ug_unitig_0.1006, evm.model.Ug_unitig_0.1035, evm.model.Ug_unitig_0.1041, evm.model.Ug_unitig_0.1099, evm.model.Ug_unitig_0.11, evm.model.Ug_unitig_0.1100, evm.model.Ug_unitig_0.1108, evm.model.Ug_unitig_0.115, evm.model.Ug_unitig_0.117, evm.model.Ug_unitig_0.119, evm.model.Ug_unitig_0.1252, evm.model.Ug_unitig_0.1279, evm.model.Ug_unitig_0.1287, evm.model.Ug_un…

## Sheet: Urenif DISPERSED
go-basic.obo: fmt(1.2) rel(2019-06-10) 47,442 GO Terms; optional_attrs(relationship)
goslim_plant.obo: fmt(1.2) rel(None) 156 GO Terms
Sections: goatools.test_data.sections.data2018_07_find_enrichment
cellular_component
GO	NS	enrichment	p_fdr_bh	dcnt	tinfo	depth	ratio_in_study	ratio_in_pop	name	p_uncorrected	study_count	study_items
GO:0005783	CC	p	3.89e-03	107	5.28757	5	365/16722	676/27751	endoplasmic reticulum	8.25e-04	365	evm.model.scaffold1008_size24807.5, evm.model.scaffold100_size686073.140, evm.model.scaffold100_size686073.204, evm.model.scaffold100_size686073.89, evm.model.scaffold101_size679088.71, evm.model.scaffold101_size679088.85, evm.model.scaffold102_size677817.22, evm.model.scaffold1041_size21800.7, evm.model.scaffold104_size664890.66, evm.model.scaffold104_size664890.83, evm.model.scaffold105_size659…
Broad
GO:0044464	CC	p	4.31e-02	3335	2.17867	1	9026/16722	15140/27751	cell part	1.74e-02	9026	evm.model.scaffold1000_size25310.2, evm.model.scaffold1001_size25237.5, evm.model.scaffold1002_size25184.1, evm.model.scaffold1004_size25060.3, evm.model.scaffold1005_size24999.1, evm.model.scaffold1006_size24908.1, evm.model.scaffold1006_size24908.4, evm.model.scaffold1007_size24833.3, evm.model.scaffold1007_size24833.4, evm.model.scaffold1008_size24807.5, evm.model.scaffold100_size686073.10, ev…
Misc.
GO	NS	enrichment	p_fdr_bh	dcnt	tinfo	depth	ratio_in_study	ratio_in_pop	name	p_uncorrected	study_count	study_items
GO:0097159	MF	e	1.74e-04	493	2.64616	2	5883/16722	9474/27751	organic cyclic compound binding	2.48e-05	5883	evm.model.scaffold1002_size25184.1, evm.model.scaffold1004_size25060.3, evm.model.scaffold1005_size24999.3, evm.model.scaffold1006_size24908.1, evm.model.scaffold1006_size24908.4, evm.model.scaffold1008_size24807.3, evm.model.scaffold100_size686073.113, evm.model.scaffold100_size686073.139, evm.model.scaffold100_size686073.140, evm.model.scaffold100_size686073.156, evm.model.scaffold100_size68607…
GO:1901363	MF	e	1.74e-04	452	2.64616	2	5883/16722	9474/27751	heterocyclic compound binding	2.48e-05	5883	evm.model.scaffold1002_size25184.1, evm.model.scaffold1004_size25060.3, evm.model.scaffold1005_size24999.3, evm.model.scaffold1006_size24908.1, evm.model.scaffold1006_size24908.4, evm.model.scaffold1008_size24807.3, evm.model.scaffold100_size686073.113, evm.model.scaffold100_size686073.139, evm.model.scaffold100_size686073.140, evm.model.scaffold100_size686073.156, evm.model.scaffold100_size68607…
GO:0016788	MF	e	1.74e-04	559	4.89172	3	671/16722	1003/27751	hydrolase activity, acting on ester bonds	1.63e-05	671	evm.model.scaffold100_size686073.65, evm.model.scaffold100_size686073.8, evm.model.scaffold1013_size24420.4, evm.model.scaffold102_size677817.179, evm.model.scaffold102_size677817.63, evm.model.scaffold103_size665001.3, evm.model.scaffold104_size664890.6, evm.model.scaffold1051_size21287.4, evm.model.scaffold105_size659173.150, evm.model.scaffold105_size659173.40, evm.model.scaffold105_size659173…
GO:0003676	MF	e	1.74e-04	328	3.08348	3	3864/16722	6118/27751	nucleic acid binding	1.45e-05	3864	evm.model.scaffold1002_size25184.1, evm.model.scaffold1004_size25060.3, evm.model.scaffold1005_size24999.3, evm.model.scaffold1006_size24908.1, evm.model.scaffold1008_size24807.3, evm.model.scaffold100_size686073.139, evm.model.scaffold100_size686073.167, evm.model.scaffold100_size686073.187, evm.model.scaffold100_size686073.65, evm.model.scaffold100_size686073.66, evm.model.scaffold100_size68607…
GO:0004518	MF	e	1.74e-04	107	4.89172	4	671/16722	1003/27751	nuclease activity	1.63e-05	671	evm.model.scaffold100_size686073.65, evm.model.scaffold100_size686073.8, evm.model.scaffold1013_size24420.4, evm.model.scaffold102_size677817.179, evm.model.scaffold102_size677817.63, evm.model.scaffold103_size665001.3, evm.model.scaffold104_size664890.6, evm.model.scaffold1051_size21287.4, evm.model.scaffold105_size659173.150, evm.model.scaffold105_size659173.40, evm.model.scaffold105_size659173…
GO:0003700	MF	e	1.74e-04	8	4.15564	2	1354/16722	2094/27751	DNA-binding transcription factor activity	2.61e-05	1354	evm.model.scaffold1005_size24999.3, evm.model.scaffold100_size686073.167, evm.model.scaffold100_size686073.66, evm.model.scaffold100_size686073.71, evm.model.scaffold1016_size24194.5, evm.model.scaffold1028_size23508.3, evm.model.scaffold102_size677817.124, evm.model.scaffold102_size677817.131, evm.model.scaffold102_size677817.135, evm.model.scaffold102_size677817.31, evm.model.scaffold102_size67…
GO:0140110	MF	e	2.31e-04	29	4.05487	1	1489/16722	2316/27751	transcription regulator activity	4.05e-05	1489	evm.model.scaffold1005_size24999.3, evm.model.scaffold100_size686073.167, evm.model.scaffold100_size686073.66, evm.model.scaffold100_size686073.71, evm.model.scaffold1016_size24194.5, evm.model.scaffold1028_size23508.3, evm.model.scaffold102_size677817.124, evm.model.scaffold102_size677817.131, evm.model.scaffold102_size677817.135, evm.model.scaffold102_size677817.137, evm.model.scaffold102_size6…
GO:0005575	CC	p	4.59e-04	4212	1.92976	0	11528/16722	19419/27751	cellular_component	2.09e-05	11528	evm.model.scaffold1000_size25310.1, evm.model.scaffold1000_size25310.2, evm.model.scaffold1001_size25237.5, evm.model.scaffold1002_size25184.1, evm.model.scaffold1004_size25060.3, evm.model.scaffold1005_size24999.1, evm.model.scaffold1006_size24908.1, evm.model.scaffold1006_size24908.2, evm.model.scaffold1006_size24908.3, evm.model.scaffold1006_size24908.4, evm.model.scaffold1007_size24833.3, evm…
GO:0044424	CC	p	4.59e-04	2384	2.41319	2	7037/16722	11975/27751	intracellular part	2.84e-05	7037	evm.model.scaffold1001_size25237.5, evm.model.scaffold1002_size25184.1, evm.model.scaffold1004_size25060.3, evm.model.scaffold1005_size24999.1, evm.model.scaffold1006_size24908.1, evm.model.scaffold1006_size24908.4, evm.model.scaffold1007_size24833.4, evm.model.scaffold1008_size24807.5, evm.model.scaffold100_size686073.113, evm.model.scaffold100_size686073.12, evm.model.scaffold100_size686073.131…
GO:0043226	CC	p	4.59e-04	1957	2.85726	1	4473/16722	7681/27751	organelle	3.91e-05	4473	evm.model.scaffold1001_size25237.5, evm.model.scaffold1005_size24999.1, evm.model.scaffold1006_size24908.4, evm.model.scaffold1007_size24833.4, evm.model.scaffold1008_size24807.5, evm.model.scaffold100_size686073.12, evm.model.scaffold100_size686073.131, evm.model.scaffold100_size686073.132, evm.model.scaffold100_size686073.139, evm.model.scaffold100_size686073.140, evm.model.scaffold100_size6860…
GO:0043229	CC	p	4.59e-04	1784	2.85726	3	4473/16722	7681/27751	intracellular organelle	3.91e-05	4473	evm.model.scaffold1001_size25237.5, evm.model.scaffold1005_size24999.1, evm.model.scaffold1006_size24908.4, evm.model.scaffold1007_size24833.4, evm.model.scaffold1008_size24807.5, evm.model.scaffold100_size686073.12, evm.model.scaffold100_size686073.131, evm.model.scaffold100_size686073.132, evm.model.scaffold100_size686073.139, evm.model.scaffold100_size686073.140, evm.model.scaffold100_size6860…
GO:0005488	MF	e	8.01e-04	1903	2.10404	1	9970/16722	16292/27751	binding	1.60e-04	9970	evm.model.scaffold1001_size25237.5, evm.model.scaffold1002_size25184.1, evm.model.scaffold1004_size25060.3, evm.model.scaffold1005_size24999.3, evm.model.scaffold1006_size24908.1, evm.model.scaffold1006_size24908.4, evm.model.scaffold1008_size24807.3, evm.model.scaffold1008_size24807.5, evm.model.scaffold100_size686073.10, evm.model.scaffold100_size686073.113, evm.model.scaffold100_size686073.115…
GO:0043228	CC	p	1.32e-03	629	4.25205	2	1069/16722	1904/27751	non-membrane-bounded organelle	1.68e-04	1069	evm.model.scaffold1005_size24999.1, evm.model.scaffold1006_size24908.4, evm.model.scaffold100_size686073.12, evm.model.scaffold100_size686073.139, evm.model.scaffold1011_size24759.4, evm.model.scaffold1013_size24420.5, evm.model.scaffold101_size679088.123, evm.model.scaffold101_size679088.86, evm.model.scaffold1028_size23508.1, evm.model.scaffold102_size677817.160, evm.model.scaffold102_size67781…
GO:0043232	CC	p	1.32e-03	601	4.25205	4	1069/16722	1904/27751	intracellular non-membrane-bounded organelle	1.68e-04	1069	evm.model.scaffold1005_size24999.1, evm.model.scaffold1006_size24908.4, evm.model.scaffold100_size686073.12, evm.model.scaffold100_size686073.139, evm.model.scaffold1011_size24759.4, evm.model.scaffold1013_size24420.5, evm.model.scaffold101_size679088.123, evm.model.scaffold101_size679088.86, evm.model.scaffold1028_size23508.1, evm.model.scaffold102_size677817.160, evm.model.scaffold102_size67781…
GO:0005622	CC	e	1.59e-03	2386	4.9452	2	628/16722	952/27751	intracellular	2.37e-04	628	evm.model.scaffold100_size686073.191, evm.model.scaffold100_size686073.65, evm.model.scaffold101_size679088.10, evm.model.scaffold102_size677817.114, evm.model.scaffold102_size677817.179, evm.model.scaffold102_size677817.27, evm.model.scaffold102_size677817.56, evm.model.scaffold103_size665001.3, evm.model.scaffold1041_size21800.5, evm.model.scaffold104_size664890.22, evm.model.scaffold104_size66…
GO:0043227	CC	p	3.89e-03	1367	3.06199	2	3657/16722	6259/27751	membrane-bounded organelle	8.19e-04	3657	evm.model.scaffold1001_size25237.5, evm.model.scaffold1006_size24908.4, evm.model.scaffold1007_size24833.4, evm.model.scaffold1008_size24807.5, evm.model.scaffold100_size686073.131, evm.model.scaffold100_size686073.132, evm.model.scaffold100_size686073.140, evm.model.scaffold100_size686073.148, evm.model.scaffold100_size686073.204, evm.model.scaffold100_size686073.8, evm.model.scaffold100_size686…
GO:0043231	CC	p	3.89e-03	1050	3.08445	4	3574/16722	6120/27751	intracellular membrane-bounded organelle	8.27e-04	3574	evm.model.scaffold1001_size25237.5, evm.model.scaffold1006_size24908.4, evm.model.scaffold1007_size24833.4, evm.model.scaffold1008_size24807.5, evm.model.scaffold100_size686073.131, evm.model.scaffold100_size686073.132, evm.model.scaffold100_size686073.140, evm.model.scaffold100_size686073.148, evm.model.scaffold100_size686073.204, evm.model.scaffold100_size686073.8, evm.model.scaffold100_size686…
GO:0044444	CC	p	6.35e-03	1270	2.81133	3	4728/16722	8042/27751	cytoplasmic part	1.49e-03	4728	evm.model.scaffold1001_size25237.5, evm.model.scaffold1004_size25060.3, evm.model.scaffold1005_size24999.1, evm.model.scaffold1006_size24908.4, evm.model.scaffold1007_size24833.4, evm.model.scaffold1008_size24807.5, evm.model.scaffold100_size686073.12, evm.model.scaffold100_size686073.131, evm.model.scaffold100_size686073.132, evm.model.scaffold100_size686073.133, evm.model.scaffold100_size686073…
GO:0016787	MF	e	6.43e-03	1490	3.18997	2	3418/16722	5500/27751	hydrolase activity	1.45e-03	3418	evm.model.scaffold1004_size25060.3, evm.model.scaffold1005_size24999.2, evm.model.scaffold1005_size24999.5, evm.model.scaffold1006_size24908.4, evm.model.scaffold100_size686073.10, evm.model.scaffold100_size686073.116, evm.model.scaffold100_size686073.139, evm.model.scaffold100_size686073.140, evm.model.scaffold100_size686073.142, evm.model.scaffold100_size686073.156, evm.model.scaffold100_size68…
GO:0098772	MF	p	9.35e-03	227	5.41896	1	321/16722	592/27751	molecular function regulator	2.57e-03	321	evm.model.scaffold1005_size24999.2, evm.model.scaffold1005_size24999.5, evm.model.scaffold100_size686073.150, evm.model.scaffold100_size686073.191, evm.model.scaffold1012_size24664.2, evm.model.scaffold103_size665001.129, evm.model.scaffold104_size664890.104, evm.model.scaffold104_size664890.67, evm.model.scaffold1056_size21079.3, evm.model.scaffold105_size659173.29, evm.model.scaffold1085_size18…
GO:0030234	MF	p	9.35e-03	152	5.41896	2	321/16722	592/27751	enzyme regulator activity	2.57e-03	321	evm.model.scaffold1005_size24999.2, evm.model.scaffold1005_size24999.5, evm.model.scaffold100_size686073.150, evm.model.scaffold100_size686073.191, evm.model.scaffold1012_size24664.2, evm.model.scaffold103_size665001.129, evm.model.scaffold104_size664890.104, evm.model.scaffold104_size664890.67, evm.model.scaffold1056_size21079.3, evm.model.scaffold105_size659173.29, evm.model.scaffold1085_size18…
GO:0044422	CC	p	1.27e-02	1634	4.27651	1	1060/16722	1858/27751	organelle part	3.77e-03	1060	evm.model.scaffold1006_size24908.1, evm.model.scaffold1006_size24908.4, evm.model.scaffold100_size686073.139, evm.model.scaffold100_size686073.143, evm.model.scaffold100_size686073.156, evm.model.scaffold100_size686073.183, evm.model.scaffold101_size679088.123, evm.model.scaffold101_size679088.85, evm.model.scaffold102_size677817.160, evm.model.scaffold104_size664890.14, evm.model.scaffold104_siz…
GO:0044446	CC	p	1.27e-02	1473	4.27651	3	1060/16722	1858/27751	intracellular organelle part	3.77e-03	1060	evm.model.scaffold1006_size24908.1, evm.model.scaffold1006_size24908.4, evm.model.scaffold100_size686073.139, evm.model.scaffold100_size686073.143, evm.model.scaffold100_size686073.156, evm.model.scaffold100_size686073.183, evm.model.scaffold101_size679088.123, evm.model.scaffold101_size679088.85, evm.model.scaffold102_size677817.160, evm.model.scaffold104_size664890.14, evm.model.scaffold104_siz…
GO:0044428	CC	p	1.27e-02	496	4.27651	4	1060/16722	1858/27751	nuclear part	3.77e-03	1060	evm.model.scaffold1006_size24908.1, evm.model.scaffold1006_size24908.4, evm.model.scaffold100_size686073.139, evm.model.scaffold100_size686073.143, evm.model.scaffold100_size686073.156, evm.model.scaffold100_size686073.183, evm.model.scaffold101_size679088.123, evm.model.scaffold101_size679088.85, evm.model.scaffold102_size677817.160, evm.model.scaffold104_size664890.14, evm.model.scaffold104_siz…
GO:0005730	CC	p	1.79e-02	26	4.99583	5	505/16722	905/27751	nucleolus	5.72e-03	505	evm.model.scaffold100_size686073.139, evm.model.scaffold102_size677817.160, evm.model.scaffold104_size664890.14, evm.model.scaffold104_size664890.18, evm.model.scaffold1056_size21079.3, evm.model.scaffold105_size659173.97, evm.model.scaffold106_size656854.178, evm.model.scaffold1075_size19277.1, evm.model.scaffold108_size655003.142, evm.model.scaffold109_size652032.1, evm.model.scaffold109_size65…
GO:0009606	BP	e	1.91e-02	7	7.22975	3	156/16722	215/27751	tropism	1.95e-04	156	evm.model.scaffold1008_size24807.5, evm.model.scaffold100_size686073.71, evm.model.scaffold103_size665001.159, evm.model.scaffold104_size664890.106, evm.model.scaffold105_size659173.131, evm.model.scaffold108_size655003.115, evm.model.scaffold10_size1516488.236, evm.model.scaffold11_size1489916.319, evm.model.scaffold121_size616638.95, evm.model.scaffold1225_size11489.1, evm.model.scaffold1252_si…
GO:0003677	MF	e	2.17e-02	146	3.75849	4	1947/16722	3115/27751	DNA binding	6.52e-03	1947	evm.model.scaffold1004_size25060.3, evm.model.scaffold1005_size24999.3, evm.model.scaffold1008_size24807.3, evm.model.scaffold100_size686073.167, evm.model.scaffold100_size686073.66, evm.model.scaffold100_size686073.71, evm.model.scaffold100_size686073.9, evm.model.scaffold1016_size24194.5, evm.model.scaffold101_size679088.123, evm.model.scaffold1028_size23508.3, evm.model.scaffold102_size677817.…
GO:0032991	CC	p	2.46e-02	2121	5.52712	1	291/16722	532/27751	protein-containing complex	9.41e-03	291	evm.model.scaffold1005_size24999.1, evm.model.scaffold100_size686073.12, evm.model.scaffold102_size677817.30, evm.model.scaffold1041_size21800.3, evm.model.scaffold1047_size21624.8, evm.model.scaffold105_size659173.87, evm.model.scaffold1075_size19277.3, evm.model.scaffold107_size656107.136, evm.model.scaffold107_size656107.170, evm.model.scaffold107_size656107.53, evm.model.scaffold108_size65500…
GO:1990904	CC	p	2.46e-02	127	5.52712	2	291/16722	532/27751	ribonucleoprotein complex	9.41e-03	291	evm.model.scaffold1005_size24999.1, evm.model.scaffold100_size686073.12, evm.model.scaffold102_size677817.30, evm.model.scaffold1041_size21800.3, evm.model.scaffold1047_size21624.8, evm.model.scaffold105_size659173.87, evm.model.scaffold1075_size19277.3, evm.model.scaffold107_size656107.136, evm.model.scaffold107_size656107.170, evm.model.scaffold107_size656107.53, evm.model.scaffold108_size65500…
GO:0005840	CC	p	2.46e-02	19	5.52712	5	291/16722	532/27751	ribosome	9.41e-03	291	evm.model.scaffold1005_size24999.1, evm.model.scaffold100_size686073.12, evm.model.scaffold102_size677817.30, evm.model.scaffold1041_size21800.3, evm.model.scaffold1047_size21624.8, evm.model.scaffold105_size659173.87, evm.model.scaffold1075_size19277.3, evm.model.scaffold107_size656107.136, evm.model.scaffold107_size656107.170, evm.model.scaffold107_size656107.53, evm.model.scaffold108_size65500…
GO:0045182	MF	p	3.96e-02	14	5.95315	1	186/16722	347/27751	translation regulator activity	1.29e-02	186	evm.model.scaffold1002_size25184.1, evm.model.scaffold1017_size24084.6, evm.model.scaffold101_size679088.9, evm.model.scaffold1038_size22408.4, evm.model.scaffold105_size659173.15, evm.model.scaffold1087_size18152.2, evm.model.scaffold110_size649966.73, evm.model.scaffold1133_size15929.3, evm.model.scaffold114_size641222.177, evm.model.scaffold1165_size14718.2, evm.model.scaffold1195_size13126.1,…

## Sheet: Ugibba DISPERSED
go-basic.obo: fmt(1.2) rel(2019-06-10) 47,442 GO Terms; optional_attrs(relationship)
goslim_plant.obo: fmt(1.2) rel(None) 156 GO Terms
Sections: goatools.test_data.sections.data2018_07_find_enrichment
microtubule
GO	NS	enrichment	p_fdr_bh	dcnt	tinfo	depth	ratio_in_study	ratio_in_pop	name	p_uncorrected	study_count	study_items
GO:0005856	CC	p	2.06e-02	274	5.33807	5	164/8366	410/17760	cytoskeleton	3.66e-03	164	evm.model.Ug_unitig_0.1078, evm.model.Ug_unitig_0.1089, evm.model.Ug_unitig_0.173, evm.model.Ug_unitig_0.2063, evm.model.Ug_unitig_0.2221, evm.model.Ug_unitig_0.2244, evm.model.Ug_unitig_0.2263, evm.model.Ug_unitig_0.2313, evm.model.Ug_unitig_0.437, evm.model.Ug_unitig_0.470, evm.model.Ug_unitig_0.473, evm.model.Ug_unitig_0.526, evm.model.Ug_unitig_0.581, evm.model.Ug_unitig_0.644, evm.model.Ug_u…
protein
GO:0006412	BP	p	8.21e-05	215	5.78489	7	221/8366	580/17760	translation	1.54e-05	221	evm.model.Ug_unitig_0.105, evm.model.Ug_unitig_0.106, evm.model.Ug_unitig_0.1259, evm.model.Ug_unitig_0.144, evm.model.Ug_unitig_0.1545, evm.model.Ug_unitig_0.1690, evm.model.Ug_unitig_0.2032, evm.model.Ug_unitig_0.2291, evm.model.Ug_unitig_0.235, evm.model.Ug_unitig_0.2446, evm.model.Ug_unitig_0.25, evm.model.Ug_unitig_0.282, evm.model.Ug_unitig_0.401, evm.model.Ug_unitig_0.588, evm.model.Ug_uni…
GO:0036211	BP	e	5.88e-03	1322	4.3457	5	1223/8366	2446/17760	protein modification process	2.10e-03	1223	evm.model.Ug_unitig_0.1015, evm.model.Ug_unitig_0.1044, evm.model.Ug_unitig_0.1049, evm.model.Ug_unitig_0.1067, evm.model.Ug_unitig_0.1068, evm.model.Ug_unitig_0.108, evm.model.Ug_unitig_0.1104, evm.model.Ug_unitig_0.1116, evm.model.Ug_unitig_0.1123, evm.model.Ug_unitig_0.1124, evm.model.Ug_unitig_0.1235, evm.model.Ug_unitig_0.1248, evm.model.Ug_unitig_0.1249, evm.model.Ug_unitig_0.127, evm.model…
GO:0006464	BP	e	5.88e-03	1320	4.3457	6	1223/8366	2446/17760	cellular protein modification process	2.10e-03	1223	evm.model.Ug_unitig_0.1015, evm.model.Ug_unitig_0.1044, evm.model.Ug_unitig_0.1049, evm.model.Ug_unitig_0.1067, evm.model.Ug_unitig_0.1068, evm.model.Ug_unitig_0.108, evm.model.Ug_unitig_0.1104, evm.model.Ug_unitig_0.1116, evm.model.Ug_unitig_0.1123, evm.model.Ug_unitig_0.1124, evm.model.Ug_unitig_0.1235, evm.model.Ug_unitig_0.1248, evm.model.Ug_unitig_0.1249, evm.model.Ug_unitig_0.127, evm.model…
phosph
GO:0016772	MF	e	5.20e-05	601	4.14324	3	708/8366	1341/17760	transferase activity, transferring phosphorus-containing groups	2.21e-05	708	evm.model.Ug_unitig_0.1015, evm.model.Ug_unitig_0.1049, evm.model.Ug_unitig_0.1062, evm.model.Ug_unitig_0.1067, evm.model.Ug_unitig_0.1104, evm.model.Ug_unitig_0.1123, evm.model.Ug_unitig_0.1124, evm.model.Ug_unitig_0.1233, evm.model.Ug_unitig_0.1235, evm.model.Ug_unitig_0.1249, evm.model.Ug_unitig_0.1281, evm.model.Ug_unitig_0.132, evm.model.Ug_unitig_0.1328, evm.model.Ug_unitig_0.1365, evm.mode…
GO:0016301	MF	e	5.20e-05	352	4.14324	4	708/8366	1341/17760	kinase activity	2.21e-05	708	evm.model.Ug_unitig_0.1015, evm.model.Ug_unitig_0.1049, evm.model.Ug_unitig_0.1062, evm.model.Ug_unitig_0.1067, evm.model.Ug_unitig_0.1104, evm.model.Ug_unitig_0.1123, evm.model.Ug_unitig_0.1124, evm.model.Ug_unitig_0.1233, evm.model.Ug_unitig_0.1235, evm.model.Ug_unitig_0.1249, evm.model.Ug_unitig_0.1281, evm.model.Ug_unitig_0.132, evm.model.Ug_unitig_0.1328, evm.model.Ug_unitig_0.1365, evm.mode…
metabolic
GO:0005975	BP	e	1.34e-04	794	5.24819	3	532/8366	992/17760	carbohydrate metabolic process	2.73e-05	532	evm.model.Ug_unitig_0.10, evm.model.Ug_unitig_0.1027, evm.model.Ug_unitig_0.1028, evm.model.Ug_unitig_0.1031, evm.model.Ug_unitig_0.1080, evm.model.Ug_unitig_0.1243, evm.model.Ug_unitig_0.1345, evm.model.Ug_unitig_0.136, evm.model.Ug_unitig_0.1360, evm.model.Ug_unitig_0.137, evm.model.Ug_unitig_0.1378, evm.model.Ug_unitig_0.1445, evm.model.Ug_unitig_0.1462, evm.model.Ug_unitig_0.1463, evm.model.U…
Broad
GO	NS	enrichment	p_fdr_bh	dcnt	tinfo	depth	ratio_in_study	ratio_in_pop	name	p_uncorrected	study_count	study_items
GO:0009987	BP	p	8.21e-05	18757	2.83375	1	5071/8366	11094/17760	cellular process	1.59e-05	5071	evm.model.Ug_unitig_0.10, evm.model.Ug_unitig_0.1000, evm.model.Ug_unitig_0.1001, evm.model.Ug_unitig_0.1002, evm.model.Ug_unitig_0.1007, evm.model.Ug_unitig_0.1008, evm.model.Ug_unitig_0.1015, evm.model.Ug_unitig_0.1019, evm.model.Ug_unitig_0.1027, evm.model.Ug_unitig_0.1028, evm.model.Ug_unitig_0.1036, evm.model.Ug_unitig_0.1042, evm.model.Ug_unitig_0.1044, evm.model.Ug_unitig_0.1045, evm.model…
GO:0044237	BP	p	8.21e-05	8670	3.3281	2	3029/8366	6767/17760	cellular metabolic process	1.46e-05	3029	evm.model.Ug_unitig_0.1001, evm.model.Ug_unitig_0.1002, evm.model.Ug_unitig_0.1015, evm.model.Ug_unitig_0.1019, evm.model.Ug_unitig_0.1036, evm.model.Ug_unitig_0.1044, evm.model.Ug_unitig_0.1045, evm.model.Ug_unitig_0.1049, evm.model.Ug_unitig_0.105, evm.model.Ug_unitig_0.106, evm.model.Ug_unitig_0.1062, evm.model.Ug_unitig_0.1067, evm.model.Ug_unitig_0.1068, evm.model.Ug_unitig_0.1077, evm.model…
GO:1901360	BP	p	8.21e-05	3874	3.84714	3	1725/8366	4027/17760	organic cyclic compound metabolic process	1.28e-05	1725	evm.model.Ug_unitig_0.1001, evm.model.Ug_unitig_0.1002, evm.model.Ug_unitig_0.1019, evm.model.Ug_unitig_0.1036, evm.model.Ug_unitig_0.1044, evm.model.Ug_unitig_0.1045, evm.model.Ug_unitig_0.1062, evm.model.Ug_unitig_0.1077, evm.model.Ug_unitig_0.1089, evm.model.Ug_unitig_0.1090, evm.model.Ug_unitig_0.1117, evm.model.Ug_unitig_0.1148, evm.model.Ug_unitig_0.1155, evm.model.Ug_unitig_0.1191, evm.mod…
GO:0034641	BP	p	8.21e-05	3512	3.75447	3	1858/8366	4418/17760	cellular nitrogen compound metabolic process	1.27e-05	1858	evm.model.Ug_unitig_0.1001, evm.model.Ug_unitig_0.1002, evm.model.Ug_unitig_0.1019, evm.model.Ug_unitig_0.1036, evm.model.Ug_unitig_0.1044, evm.model.Ug_unitig_0.1045, evm.model.Ug_unitig_0.105, evm.model.Ug_unitig_0.106, evm.model.Ug_unitig_0.1062, evm.model.Ug_unitig_0.1077, evm.model.Ug_unitig_0.1089, evm.model.Ug_unitig_0.1090, evm.model.Ug_unitig_0.1117, evm.model.Ug_unitig_0.1148, evm.model…
GO:0006725	BP	p	8.21e-05	3345	3.84714	3	1725/8366	4027/17760	cellular aromatic compound metabolic process	1.28e-05	1725	evm.model.Ug_unitig_0.1001, evm.model.Ug_unitig_0.1002, evm.model.Ug_unitig_0.1019, evm.model.Ug_unitig_0.1036, evm.model.Ug_unitig_0.1044, evm.model.Ug_unitig_0.1045, evm.model.Ug_unitig_0.1062, evm.model.Ug_unitig_0.1077, evm.model.Ug_unitig_0.1089, evm.model.Ug_unitig_0.1090, evm.model.Ug_unitig_0.1117, evm.model.Ug_unitig_0.1148, evm.model.Ug_unitig_0.1155, evm.model.Ug_unitig_0.1191, evm.mod…
GO:0046483	BP	p	8.21e-05	3260	3.84714	3	1725/8366	4027/17760	heterocycle metabolic process	1.28e-05	1725	evm.model.Ug_unitig_0.1001, evm.model.Ug_unitig_0.1002, evm.model.Ug_unitig_0.1019, evm.model.Ug_unitig_0.1036, evm.model.Ug_unitig_0.1044, evm.model.Ug_unitig_0.1045, evm.model.Ug_unitig_0.1062, evm.model.Ug_unitig_0.1077, evm.model.Ug_unitig_0.1089, evm.model.Ug_unitig_0.1090, evm.model.Ug_unitig_0.1117, evm.model.Ug_unitig_0.1148, evm.model.Ug_unitig_0.1155, evm.model.Ug_unitig_0.1191, evm.mod…
GO:0043603	BP	p	8.21e-05	632	5.78489	4	221/8366	580/17760	cellular amide metabolic process	1.54e-05	221	evm.model.Ug_unitig_0.105, evm.model.Ug_unitig_0.106, evm.model.Ug_unitig_0.1259, evm.model.Ug_unitig_0.144, evm.model.Ug_unitig_0.1545, evm.model.Ug_unitig_0.1690, evm.model.Ug_unitig_0.2032, evm.model.Ug_unitig_0.2291, evm.model.Ug_unitig_0.235, evm.model.Ug_unitig_0.2446, evm.model.Ug_unitig_0.25, evm.model.Ug_unitig_0.282, evm.model.Ug_unitig_0.401, evm.model.Ug_unitig_0.588, evm.model.Ug_uni…
GO:0006518	BP	p	8.21e-05	356	5.78489	5	221/8366	580/17760	peptide metabolic process	1.54e-05	221	evm.model.Ug_unitig_0.105, evm.model.Ug_unitig_0.106, evm.model.Ug_unitig_0.1259, evm.model.Ug_unitig_0.144, evm.model.Ug_unitig_0.1545, evm.model.Ug_unitig_0.1690, evm.model.Ug_unitig_0.2032, evm.model.Ug_unitig_0.2291, evm.model.Ug_unitig_0.235, evm.model.Ug_unitig_0.2446, evm.model.Ug_unitig_0.25, evm.model.Ug_unitig_0.282, evm.model.Ug_unitig_0.401, evm.model.Ug_unitig_0.588, evm.model.Ug_uni…
GO:0006807	BP	p	1.38e-04	6139	3.28486	2	3188/8366	7066/17760	nitrogen compound metabolic process	2.95e-05	3188	evm.model.Ug_unitig_0.1001, evm.model.Ug_unitig_0.1002, evm.model.Ug_unitig_0.1015, evm.model.Ug_unitig_0.1019, evm.model.Ug_unitig_0.1036, evm.model.Ug_unitig_0.1044, evm.model.Ug_unitig_0.1045, evm.model.Ug_unitig_0.1049, evm.model.Ug_unitig_0.105, evm.model.Ug_unitig_0.106, evm.model.Ug_unitig_0.1062, evm.model.Ug_unitig_0.1067, evm.model.Ug_unitig_0.1068, evm.model.Ug_unitig_0.1077, evm.model…
GO:0043412	BP	e	5.88e-03	1487	4.3457	4	1223/8366	2446/17760	macromolecule modification	2.10e-03	1223	evm.model.Ug_unitig_0.1015, evm.model.Ug_unitig_0.1044, evm.model.Ug_unitig_0.1049, evm.model.Ug_unitig_0.1067, evm.model.Ug_unitig_0.1068, evm.model.Ug_unitig_0.108, evm.model.Ug_unitig_0.1104, evm.model.Ug_unitig_0.1116, evm.model.Ug_unitig_0.1123, evm.model.Ug_unitig_0.1124, evm.model.Ug_unitig_0.1235, evm.model.Ug_unitig_0.1248, evm.model.Ug_unitig_0.1249, evm.model.Ug_unitig_0.127, evm.model…
GO:0016020	CC	e	2.06e-02	1048	2.38532	1	3795/8366	7855/17760	membrane	4.23e-03	3795	evm.model.Ug_unitig_0.10, evm.model.Ug_unitig_0.1000, evm.model.Ug_unitig_0.1002, evm.model.Ug_unitig_0.1004, evm.model.Ug_unitig_0.1007, evm.model.Ug_unitig_0.1008, evm.model.Ug_unitig_0.1015, evm.model.Ug_unitig_0.1018, evm.model.Ug_unitig_0.1027, evm.model.Ug_unitig_0.1028, evm.model.Ug_unitig_0.1049, evm.model.Ug_unitig_0.1054, evm.model.Ug_unitig_0.1057, evm.model.Ug_unitig_0.1067, evm.model…
Misc.
GO	NS	enrichment	p_fdr_bh	dcnt	tinfo	depth	ratio_in_study	ratio_in_pop	name	p_uncorrected	study_count	study_items
GO:0036094	MF	e	3.54e-05	186	3.51518	2	1347/8366	2513/17760	small molecule binding	9.74e-06	1347	evm.model.Ug_unitig_0.1002, evm.model.Ug_unitig_0.1004, evm.model.Ug_unitig_0.1015, evm.model.Ug_unitig_0.1049, evm.model.Ug_unitig_0.1062, evm.model.Ug_unitig_0.1067, evm.model.Ug_unitig_0.1077, evm.model.Ug_unitig_0.1078, evm.model.Ug_unitig_0.1089, evm.model.Ug_unitig_0.1096, evm.model.Ug_unitig_0.1104, evm.model.Ug_unitig_0.1107, evm.model.Ug_unitig_0.1123, evm.model.Ug_unitig_0.1124, evm.mod…
GO:1901265	MF	e	3.54e-05	58	3.51677	3	1345/8366	2509/17760	nucleoside phosphate binding	9.60e-06	1345	evm.model.Ug_unitig_0.1002, evm.model.Ug_unitig_0.1004, evm.model.Ug_unitig_0.1015, evm.model.Ug_unitig_0.1049, evm.model.Ug_unitig_0.1062, evm.model.Ug_unitig_0.1067, evm.model.Ug_unitig_0.1077, evm.model.Ug_unitig_0.1078, evm.model.Ug_unitig_0.1089, evm.model.Ug_unitig_0.1096, evm.model.Ug_unitig_0.1104, evm.model.Ug_unitig_0.1107, evm.model.Ug_unitig_0.1123, evm.model.Ug_unitig_0.1124, evm.mod…
GO:0016788	MF	e	3.54e-05	559	5.01291	3	391/8366	562/17760	hydrolase activity, acting on ester bonds	4.08e-06	391	evm.model.Ug_unitig_0.1048, evm.model.Ug_unitig_0.1089, evm.model.Ug_unitig_0.1193, evm.model.Ug_unitig_0.1606, evm.model.Ug_unitig_0.1833, evm.model.Ug_unitig_0.1919, evm.model.Ug_unitig_0.2034, evm.model.Ug_unitig_0.2044, evm.model.Ug_unitig_0.2136, evm.model.Ug_unitig_0.2145, evm.model.Ug_unitig_0.2229, evm.model.Ug_unitig_0.2230, evm.model.Ug_unitig_0.2460, evm.model.Ug_unitig_0.2497, evm.mod…
GO:0005215	MF	e	3.54e-05	1056	4.26607	1	672/8366	1186/17760	transporter activity	7.08e-06	672	evm.model.Ug_unitig_0.1008, evm.model.Ug_unitig_0.1054, evm.model.Ug_unitig_0.1105, evm.model.Ug_unitig_0.1141, evm.model.Ug_unitig_0.124, evm.model.Ug_unitig_0.1344, evm.model.Ug_unitig_0.1447, evm.model.Ug_unitig_0.1448, evm.model.Ug_unitig_0.1557, evm.model.Ug_unitig_0.1673, evm.model.Ug_unitig_0.1674, evm.model.Ug_unitig_0.1702, evm.model.Ug_unitig_0.175, evm.model.Ug_unitig_0.1753, evm.model…
GO:0003723	MF	e	3.54e-05	171	4.05071	4	799/8366	1471/17760	RNA binding	8.62e-06	799	evm.model.Ug_unitig_0.1036, evm.model.Ug_unitig_0.106, evm.model.Ug_unitig_0.1077, evm.model.Ug_unitig_0.1090, evm.model.Ug_unitig_0.1097, evm.model.Ug_unitig_0.1155, evm.model.Ug_unitig_0.1191, evm.model.Ug_unitig_0.1198, evm.model.Ug_unitig_0.1221, evm.model.Ug_unitig_0.1226, evm.model.Ug_unitig_0.144, evm.model.Ug_unitig_0.1443, evm.model.Ug_unitig_0.1599, evm.model.Ug_unitig_0.1606, evm.model…
GO:0004518	MF	e	3.54e-05	107	5.01291	4	391/8366	562/17760	nuclease activity	4.08e-06	391	evm.model.Ug_unitig_0.1048, evm.model.Ug_unitig_0.1089, evm.model.Ug_unitig_0.1193, evm.model.Ug_unitig_0.1606, evm.model.Ug_unitig_0.1833, evm.model.Ug_unitig_0.1919, evm.model.Ug_unitig_0.2034, evm.model.Ug_unitig_0.2044, evm.model.Ug_unitig_0.2136, evm.model.Ug_unitig_0.2145, evm.model.Ug_unitig_0.2229, evm.model.Ug_unitig_0.2230, evm.model.Ug_unitig_0.2460, evm.model.Ug_unitig_0.2497, evm.mod…
GO:0000166	MF	e	3.54e-05	56	3.51677	4	1345/8366	2509/17760	nucleotide binding	9.60e-06	1345	evm.model.Ug_unitig_0.1002, evm.model.Ug_unitig_0.1004, evm.model.Ug_unitig_0.1015, evm.model.Ug_unitig_0.1049, evm.model.Ug_unitig_0.1062, evm.model.Ug_unitig_0.1067, evm.model.Ug_unitig_0.1077, evm.model.Ug_unitig_0.1078, evm.model.Ug_unitig_0.1089, evm.model.Ug_unitig_0.1096, evm.model.Ug_unitig_0.1104, evm.model.Ug_unitig_0.1107, evm.model.Ug_unitig_0.1123, evm.model.Ug_unitig_0.1124, evm.mod…
GO:0030246	MF	e	3.54e-05	47	5.97377	2	137/8366	215/17760	carbohydrate binding	4.85e-06	137	evm.model.Ug_unitig_0.1027, evm.model.Ug_unitig_0.1028, evm.model.Ug_unitig_0.1490, evm.model.Ug_unitig_0.1531, evm.model.Ug_unitig_0.1900, evm.model.Ug_unitig_0.1933, evm.model.Ug_unitig_0.384, evm.model.Ug_unitig_0.412, evm.model.Ug_unitig_0.428, evm.model.Ug_unitig_0.446, evm.model.Ug_unitig_0.494, evm.model.Ug_unitig_0.708, evm.model.Ug_unitig_0.724, evm.model.Ug_unitig_0.770, evm.model.Ug_un…
GO:0005198	MF	p	3.54e-05	42	5.10414	1	169/8366	513/17760	structural molecule activity	4.43e-06	169	evm.model.Ug_unitig_0.105, evm.model.Ug_unitig_0.106, evm.model.Ug_unitig_0.1259, evm.model.Ug_unitig_0.144, evm.model.Ug_unitig_0.1690, evm.model.Ug_unitig_0.2032, evm.model.Ug_unitig_0.235, evm.model.Ug_unitig_0.401, evm.model.Ug_unitig_0.473, evm.model.Ug_unitig_0.611, evm.model.Ug_unitig_0.619, evm.model.Ug_unitig_0.698, evm.model.Ug_unitig_0.720, evm.model.Ug_unitig_0.805, evm.model.Ug_uniti…
GO:0140110	MF	p	3.54e-05	29	3.93286	1	633/8366	1655/17760	transcription regulator activity	8.57e-06	633	evm.model.Ug_unitig_0.1001, evm.model.Ug_unitig_0.1019, evm.model.Ug_unitig_0.1045, evm.model.Ug_unitig_0.1148, evm.model.Ug_unitig_0.1192, evm.model.Ug_unitig_0.1247, evm.model.Ug_unitig_0.1295, evm.model.Ug_unitig_0.134, evm.model.Ug_unitig_0.1363, evm.model.Ug_unitig_0.1417, evm.model.Ug_unitig_0.142, evm.model.Ug_unitig_0.1438, evm.model.Ug_unitig_0.1545, evm.model.Ug_unitig_0.1549, evm.model…
GO:0003700	MF	p	3.54e-05	8	4.01466	2	592/8366	1525/17760	DNA-binding transcription factor activity	8.30e-06	592	evm.model.Ug_unitig_0.1001, evm.model.Ug_unitig_0.1019, evm.model.Ug_unitig_0.1045, evm.model.Ug_unitig_0.1148, evm.model.Ug_unitig_0.1192, evm.model.Ug_unitig_0.1247, evm.model.Ug_unitig_0.1295, evm.model.Ug_unitig_0.134, evm.model.Ug_unitig_0.1417, evm.model.Ug_unitig_0.142, evm.model.Ug_unitig_0.1438, evm.model.Ug_unitig_0.1545, evm.model.Ug_unitig_0.1549, evm.model.Ug_unitig_0.1555, evm.model…
GO:0003674	MF	e	3.55e-05	11075	1.72402	0	7275/8366	15069/17760	molecular_function	1.06e-05	7275	evm.model.Ug_unitig_0.10, evm.model.Ug_unitig_0.1000, evm.model.Ug_unitig_0.1001, evm.model.Ug_unitig_0.1002, evm.model.Ug_unitig_0.1004, evm.model.Ug_unitig_0.1007, evm.model.Ug_unitig_0.1008, evm.model.Ug_unitig_0.1013, evm.model.Ug_unitig_0.1015, evm.model.Ug_unitig_0.1019, evm.model.Ug_unitig_0.1025, evm.model.Ug_unitig_0.1027, evm.model.Ug_unitig_0.1028, evm.model.Ug_unitig_0.1031, evm.model…
GO:0016787	MF	e	3.57e-05	1490	3.21819	2	1902/8366	3382/17760	hydrolase activity	1.16e-05	1902	evm.model.Ug_unitig_0.1002, evm.model.Ug_unitig_0.1004, evm.model.Ug_unitig_0.1027, evm.model.Ug_unitig_0.1028, evm.model.Ug_unitig_0.1036, evm.model.Ug_unitig_0.1048, evm.model.Ug_unitig_0.1058, evm.model.Ug_unitig_0.1059, evm.model.Ug_unitig_0.1068, evm.model.Ug_unitig_0.1077, evm.model.Ug_unitig_0.1078, evm.model.Ug_unitig_0.1089, evm.model.Ug_unitig_0.1096, evm.model.Ug_unitig_0.1106, evm.mod…
GO:0003824	MF	e	4.26e-05	7519	2.26795	1	4554/8366	8747/17760	catalytic activity	1.49e-05	4554	evm.model.Ug_unitig_0.10, evm.model.Ug_unitig_0.1002, evm.model.Ug_unitig_0.1004, evm.model.Ug_unitig_0.1007, evm.model.Ug_unitig_0.1013, evm.model.Ug_unitig_0.1015, evm.model.Ug_unitig_0.1027, evm.model.Ug_unitig_0.1028, evm.model.Ug_unitig_0.1031, evm.model.Ug_unitig_0.1036, evm.model.Ug_unitig_0.1042, evm.model.Ug_unitig_0.1044, evm.model.Ug_unitig_0.1048, evm.model.Ug_unitig_0.1049, evm.model…
GO:0016740	MF	e	5.20e-05	2462	3.08314	2	1947/8366	3871/17760	transferase activity	2.03e-05	1947	evm.model.Ug_unitig_0.10, evm.model.Ug_unitig_0.1013, evm.model.Ug_unitig_0.1015, evm.model.Ug_unitig_0.1031, evm.model.Ug_unitig_0.1049, evm.model.Ug_unitig_0.1058, evm.model.Ug_unitig_0.1059, evm.model.Ug_unitig_0.1062, evm.model.Ug_unitig_0.1067, evm.model.Ug_unitig_0.1080, evm.model.Ug_unitig_0.1090, evm.model.Ug_unitig_0.1104, evm.model.Ug_unitig_0.1116, evm.model.Ug_unitig_0.1123, evm.model…
GO:0005622	CC	e	5.56e-05	2386	4.88963	2	393/8366	642/17760	intracellular	5.15e-06	393	evm.model.Ug_unitig_0.1015, evm.model.Ug_unitig_0.124, evm.model.Ug_unitig_0.1480, evm.model.Ug_unitig_0.1606, evm.model.Ug_unitig_0.1851, evm.model.Ug_unitig_0.186, evm.model.Ug_unitig_0.1919, evm.model.Ug_unitig_0.2033, evm.model.Ug_unitig_0.2046, evm.model.Ug_unitig_0.2136, evm.model.Ug_unitig_0.2145, evm.model.Ug_unitig_0.2230, evm.model.Ug_unitig_0.2234, evm.model.Ug_unitig_0.280, evm.model.…
GO:0032991	CC	p	5.56e-05	2121	5.54909	1	106/8366	332/17760	protein-containing complex	3.77e-06	106	evm.model.Ug_unitig_0.105, evm.model.Ug_unitig_0.106, evm.model.Ug_unitig_0.1259, evm.model.Ug_unitig_0.144, evm.model.Ug_unitig_0.1690, evm.model.Ug_unitig_0.235, evm.model.Ug_unitig_0.401, evm.model.Ug_unitig_0.619, evm.model.Ug_unitig_0.720, evm.model.Ug_unitig_0.805, evm.model.Ug_unitig_0.881, evm.model.Ug_unitig_0.988, evm.model.Ug_unitig_11.1, evm.model.Ug_unitig_21.474, evm.model.Ug_unitig…
GO:1990904	CC	p	5.56e-05	127	5.54909	2	106/8366	332/17760	ribonucleoprotein complex	3.77e-06	106	evm.model.Ug_unitig_0.105, evm.model.Ug_unitig_0.106, evm.model.Ug_unitig_0.1259, evm.model.Ug_unitig_0.144, evm.model.Ug_unitig_0.1690, evm.model.Ug_unitig_0.235, evm.model.Ug_unitig_0.401, evm.model.Ug_unitig_0.619, evm.model.Ug_unitig_0.720, evm.model.Ug_unitig_0.805, evm.model.Ug_unitig_0.881, evm.model.Ug_unitig_0.988, evm.model.Ug_unitig_11.1, evm.model.Ug_unitig_21.474, evm.model.Ug_unitig…
GO:0043228	CC	p	5.56e-05	629	4.29032	2	455/8366	1169/17760	non-membrane-bounded organelle	7.10e-06	455	evm.model.Ug_unitig_0.1036, evm.model.Ug_unitig_0.105, evm.model.Ug_unitig_0.106, evm.model.Ug_unitig_0.1077, evm.model.Ug_unitig_0.1078, evm.model.Ug_unitig_0.1089, evm.model.Ug_unitig_0.1259, evm.model.Ug_unitig_0.1280, evm.model.Ug_unitig_0.139, evm.model.Ug_unitig_0.144, evm.model.Ug_unitig_0.162, evm.model.Ug_unitig_0.1660, evm.model.Ug_unitig_0.1690, evm.model.Ug_unitig_0.173, evm.model.Ug_…
GO:0043232	CC	p	5.56e-05	601	4.29032	4	455/8366	1169/17760	intracellular non-membrane-bounded organelle	7.10e-06	455	evm.model.Ug_unitig_0.1036, evm.model.Ug_unitig_0.105, evm.model.Ug_unitig_0.106, evm.model.Ug_unitig_0.1077, evm.model.Ug_unitig_0.1078, evm.model.Ug_unitig_0.1089, evm.model.Ug_unitig_0.1259, evm.model.Ug_unitig_0.1280, evm.model.Ug_unitig_0.139, evm.model.Ug_unitig_0.144, evm.model.Ug_unitig_0.162, evm.model.Ug_unitig_0.1660, evm.model.Ug_unitig_0.1690, evm.model.Ug_unitig_0.173, evm.model.Ug_…
GO:0005840	CC	p	5.56e-05	19	5.54909	5	106/8366	332/17760	ribosome	3.77e-06	106	evm.model.Ug_unitig_0.105, evm.model.Ug_unitig_0.106, evm.model.Ug_unitig_0.1259, evm.model.Ug_unitig_0.144, evm.model.Ug_unitig_0.1690, evm.model.Ug_unitig_0.235, evm.model.Ug_unitig_0.401, evm.model.Ug_unitig_0.619, evm.model.Ug_unitig_0.720, evm.model.Ug_unitig_0.805, evm.model.Ug_unitig_0.881, evm.model.Ug_unitig_0.988, evm.model.Ug_unitig_11.1, evm.model.Ug_unitig_21.474, evm.model.Ug_unitig…
GO:0009058	BP	p	8.21e-05	3649	3.64462	2	2155/8366	4931/17760	biosynthetic process	1.38e-05	2155	evm.model.Ug_unitig_0.10, evm.model.Ug_unitig_0.1001, evm.model.Ug_unitig_0.1019, evm.model.Ug_unitig_0.1042, evm.model.Ug_unitig_0.1044, evm.model.Ug_unitig_0.1045, evm.model.Ug_unitig_0.105, evm.model.Ug_unitig_0.1057, evm.model.Ug_unitig_0.106, evm.model.Ug_unitig_0.1062, evm.model.Ug_unitig_0.1116, evm.model.Ug_unitig_0.1119, evm.model.Ug_unitig_0.1148, evm.model.Ug_unitig_0.1186, evm.model.U…
GO:1901576	BP	p	8.21e-05	3492	5.78489	3	221/8366	580/17760	organic substance biosynthetic process	1.54e-05	221	evm.model.Ug_unitig_0.105, evm.model.Ug_unitig_0.106, evm.model.Ug_unitig_0.1259, evm.model.Ug_unitig_0.144, evm.model.Ug_unitig_0.1545, evm.model.Ug_unitig_0.1690, evm.model.Ug_unitig_0.2032, evm.model.Ug_unitig_0.2291, evm.model.Ug_unitig_0.235, evm.model.Ug_unitig_0.2446, evm.model.Ug_unitig_0.25, evm.model.Ug_unitig_0.282, evm.model.Ug_unitig_0.401, evm.model.Ug_unitig_0.588, evm.model.Ug_uni…
GO:0044249	BP	p	8.21e-05	3264	5.78489	3	221/8366	580/17760	cellular biosynthetic process	1.54e-05	221	evm.model.Ug_unitig_0.105, evm.model.Ug_unitig_0.106, evm.model.Ug_unitig_0.1259, evm.model.Ug_unitig_0.144, evm.model.Ug_unitig_0.1545, evm.model.Ug_unitig_0.1690, evm.model.Ug_unitig_0.2032, evm.model.Ug_unitig_0.2291, evm.model.Ug_unitig_0.235, evm.model.Ug_unitig_0.2446, evm.model.Ug_unitig_0.25, evm.model.Ug_unitig_0.282, evm.model.Ug_unitig_0.401, evm.model.Ug_unitig_0.588, evm.model.Ug_uni…
GO:0044271	BP	p	8.21e-05	1683	5.78489	4	221/8366	580/17760	cellular nitrogen compound biosynthetic process	1.54e-05	221	evm.model.Ug_unitig_0.105, evm.model.Ug_unitig_0.106, evm.model.Ug_unitig_0.1259, evm.model.Ug_unitig_0.144, evm.model.Ug_unitig_0.1545, evm.model.Ug_unitig_0.1690, evm.model.Ug_unitig_0.2032, evm.model.Ug_unitig_0.2291, evm.model.Ug_unitig_0.235, evm.model.Ug_unitig_0.2446, evm.model.Ug_unitig_0.25, evm.model.Ug_unitig_0.282, evm.model.Ug_unitig_0.401, evm.model.Ug_unitig_0.588, evm.model.Ug_uni…
GO:0009059	BP	p	8.21e-05	1567	5.78489	4	221/8366	580/17760	macromolecule biosynthetic process	1.54e-05	221	evm.model.Ug_unitig_0.105, evm.model.Ug_unitig_0.106, evm.model.Ug_unitig_0.1259, evm.model.Ug_unitig_0.144, evm.model.Ug_unitig_0.1545, evm.model.Ug_unitig_0.1690, evm.model.Ug_unitig_0.2032, evm.model.Ug_unitig_0.2291, evm.model.Ug_unitig_0.235, evm.model.Ug_unitig_0.2446, evm.model.Ug_unitig_0.25, evm.model.Ug_unitig_0.282, evm.model.Ug_unitig_0.401, evm.model.Ug_unitig_0.588, evm.model.Ug_uni…
GO:1901566	BP	p	8.21e-05	1344	5.78489	4	221/8366	580/17760	organonitrogen compound biosynthetic process	1.54e-05	221	evm.model.Ug_unitig_0.105, evm.model.Ug_unitig_0.106, evm.model.Ug_unitig_0.1259, evm.model.Ug_unitig_0.144, evm.model.Ug_unitig_0.1545, evm.model.Ug_unitig_0.1690, evm.model.Ug_unitig_0.2032, evm.model.Ug_unitig_0.2291, evm.model.Ug_unitig_0.235, evm.model.Ug_unitig_0.2446, evm.model.Ug_unitig_0.25, evm.model.Ug_unitig_0.282, evm.model.Ug_unitig_0.401, evm.model.Ug_unitig_0.588, evm.model.Ug_uni…
GO:0034645	BP	p	8.21e-05	1256	5.78489	5	221/8366	580/17760	cellular macromolecule biosynthetic process	1.54e-05	221	evm.model.Ug_unitig_0.105, evm.model.Ug_unitig_0.106, evm.model.Ug_unitig_0.1259, evm.model.Ug_unitig_0.144, evm.model.Ug_unitig_0.1545, evm.model.Ug_unitig_0.1690, evm.model.Ug_unitig_0.2032, evm.model.Ug_unitig_0.2291, evm.model.Ug_unitig_0.235, evm.model.Ug_unitig_0.2446, evm.model.Ug_unitig_0.25, evm.model.Ug_unitig_0.282, evm.model.Ug_unitig_0.401, evm.model.Ug_unitig_0.588, evm.model.Ug_uni…
GO:0043604	BP	p	8.21e-05	389	5.78489	5	221/8366	580/17760	amide biosynthetic process	1.54e-05	221	evm.model.Ug_unitig_0.105, evm.model.Ug_unitig_0.106, evm.model.Ug_unitig_0.1259, evm.model.Ug_unitig_0.144, evm.model.Ug_unitig_0.1545, evm.model.Ug_unitig_0.1690, evm.model.Ug_unitig_0.2032, evm.model.Ug_unitig_0.2291, evm.model.Ug_unitig_0.235, evm.model.Ug_unitig_0.2446, evm.model.Ug_unitig_0.25, evm.model.Ug_unitig_0.282, evm.model.Ug_unitig_0.401, evm.model.Ug_unitig_0.588, evm.model.Ug_uni…
GO:0043043	BP	p	8.21e-05	292	5.78489	6	221/8366	580/17760	peptide biosynthetic process	1.54e-05	221	evm.model.Ug_unitig_0.105, evm.model.Ug_unitig_0.106, evm.model.Ug_unitig_0.1259, evm.model.Ug_unitig_0.144, evm.model.Ug_unitig_0.1545, evm.model.Ug_unitig_0.1690, evm.model.Ug_unitig_0.2032, evm.model.Ug_unitig_0.2291, evm.model.Ug_unitig_0.235, evm.model.Ug_unitig_0.2446, evm.model.Ug_unitig_0.25, evm.model.Ug_unitig_0.282, evm.model.Ug_unitig_0.401, evm.model.Ug_unitig_0.588, evm.model.Ug_uni…
GO:0006139	BP	p	8.21e-05	2463	3.84714	4	1725/8366	4027/17760	nucleobase-containing compound metabolic process	1.28e-05	1725	evm.model.Ug_unitig_0.1001, evm.model.Ug_unitig_0.1002, evm.model.Ug_unitig_0.1019, evm.model.Ug_unitig_0.1036, evm.model.Ug_unitig_0.1044, evm.model.Ug_unitig_0.1045, evm.model.Ug_unitig_0.1062, evm.model.Ug_unitig_0.1077, evm.model.Ug_unitig_0.1089, evm.model.Ug_unitig_0.1090, evm.model.Ug_unitig_0.1117, evm.model.Ug_unitig_0.1148, evm.model.Ug_unitig_0.1155, evm.model.Ug_unitig_0.1191, evm.mod…
GO:0097159	MF	e	2.22e-04	493	2.64473	2	2950/8366	6001/17760	organic cyclic compound binding	1.06e-04	2950	evm.model.Ug_unitig_0.1001, evm.model.Ug_unitig_0.1002, evm.model.Ug_unitig_0.1004, evm.model.Ug_unitig_0.1015, evm.model.Ug_unitig_0.1019, evm.model.Ug_unitig_0.1036, evm.model.Ug_unitig_0.1045, evm.model.Ug_unitig_0.1048, evm.model.Ug_unitig_0.1049, evm.model.Ug_unitig_0.106, evm.model.Ug_unitig_0.1062, evm.model.Ug_unitig_0.1067, evm.model.Ug_unitig_0.1077, evm.model.Ug_unitig_0.1078, evm.mode…
GO:1901363	MF	e	2.22e-04	452	2.64473	2	2950/8366	6001/17760	heterocyclic compound binding	1.06e-04	2950	evm.model.Ug_unitig_0.1001, evm.model.Ug_unitig_0.1002, evm.model.Ug_unitig_0.1004, evm.model.Ug_unitig_0.1015, evm.model.Ug_unitig_0.1019, evm.model.Ug_unitig_0.1036, evm.model.Ug_unitig_0.1045, evm.model.Ug_unitig_0.1048, evm.model.Ug_unitig_0.1049, evm.model.Ug_unitig_0.106, evm.model.Ug_unitig_0.1062, evm.model.Ug_unitig_0.1067, evm.model.Ug_unitig_0.1077, evm.model.Ug_unitig_0.1078, evm.mode…
GO:0051179	BP	e	4.11e-04	4383	4.32227	1	1270/8366	2504/17760	localization	1.01e-04	1270	evm.model.Ug_unitig_0.1002, evm.model.Ug_unitig_0.1008, evm.model.Ug_unitig_0.1015, evm.model.Ug_unitig_0.1054, evm.model.Ug_unitig_0.1070, evm.model.Ug_unitig_0.1078, evm.model.Ug_unitig_0.1096, evm.model.Ug_unitig_0.1105, evm.model.Ug_unitig_0.1120, evm.model.Ug_unitig_0.1121, evm.model.Ug_unitig_0.1161, evm.model.Ug_unitig_0.124, evm.model.Ug_unitig_0.1344, evm.model.Ug_unitig_0.1429, evm.mode…
GO:0051234	BP	e	4.11e-04	3139	4.32227	2	1270/8366	2504/17760	establishment of localization	1.01e-04	1270	evm.model.Ug_unitig_0.1002, evm.model.Ug_unitig_0.1008, evm.model.Ug_unitig_0.1015, evm.model.Ug_unitig_0.1054, evm.model.Ug_unitig_0.1070, evm.model.Ug_unitig_0.1078, evm.model.Ug_unitig_0.1096, evm.model.Ug_unitig_0.1105, evm.model.Ug_unitig_0.1120, evm.model.Ug_unitig_0.1121, evm.model.Ug_unitig_0.1161, evm.model.Ug_unitig_0.124, evm.model.Ug_unitig_0.1344, evm.model.Ug_unitig_0.1429, evm.mode…
GO:0006810	BP	e	4.11e-04	3012	4.32227	3	1270/8366	2504/17760	transport	1.01e-04	1270	evm.model.Ug_unitig_0.1002, evm.model.Ug_unitig_0.1008, evm.model.Ug_unitig_0.1015, evm.model.Ug_unitig_0.1054, evm.model.Ug_unitig_0.1070, evm.model.Ug_unitig_0.1078, evm.model.Ug_unitig_0.1096, evm.model.Ug_unitig_0.1105, evm.model.Ug_unitig_0.1120, evm.model.Ug_unitig_0.1121, evm.model.Ug_unitig_0.1161, evm.model.Ug_unitig_0.124, evm.model.Ug_unitig_0.1344, evm.model.Ug_unitig_0.1429, evm.mode…
GO:0050896	BP	p	6.42e-04	5954	3.66676	1	2160/8366	4823/17760	response to stimulus	1.64e-04	2160	evm.model.Ug_unitig_0.1001, evm.model.Ug_unitig_0.1002, evm.model.Ug_unitig_0.1007, evm.model.Ug_unitig_0.1008, evm.model.Ug_unitig_0.1015, evm.model.Ug_unitig_0.1018, evm.model.Ug_unitig_0.1019, evm.model.Ug_unitig_0.1036, evm.model.Ug_unitig_0.1057, evm.model.Ug_unitig_0.108, evm.model.Ug_unitig_0.1080, evm.model.Ug_unitig_0.1089, evm.model.Ug_unitig_0.1115, evm.model.Ug_unitig_0.1116, evm.mode…
GO:0003677	MF	p	1.09e-03	146	3.68618	4	923/8366	2118/17760	DNA binding	5.47e-04	923	evm.model.Ug_unitig_0.1001, evm.model.Ug_unitig_0.1002, evm.model.Ug_unitig_0.1019, evm.model.Ug_unitig_0.1089, evm.model.Ug_unitig_0.1107, evm.model.Ug_unitig_0.1148, evm.model.Ug_unitig_0.1192, evm.model.Ug_unitig_0.1193, evm.model.Ug_unitig_0.1204, evm.model.Ug_unitig_0.1247, evm.model.Ug_unitig_0.128, evm.model.Ug_unitig_0.1280, evm.model.Ug_unitig_0.1295, evm.model.Ug_unitig_0.1417, evm.mode…
GO:0009314	BP	p	2.27e-03	134	5.60833	3	282/8366	692/17760	response to radiation	6.26e-04	282	evm.model.Ug_unitig_0.1209, evm.model.Ug_unitig_0.1397, evm.model.Ug_unitig_0.1438, evm.model.Ug_unitig_0.145, evm.model.Ug_unitig_0.1480, evm.model.Ug_unitig_0.1549, evm.model.Ug_unitig_0.1555, evm.model.Ug_unitig_0.1557, evm.model.Ug_unitig_0.1632, evm.model.Ug_unitig_0.1782, evm.model.Ug_unitig_0.1875, evm.model.Ug_unitig_0.1876, evm.model.Ug_unitig_0.1918, evm.model.Ug_unitig_0.2, evm.model.U…
GO:0009416	BP	p	2.27e-03	117	5.60833	4	282/8366	692/17760	response to light stimulus	6.26e-04	282	evm.model.Ug_unitig_0.1209, evm.model.Ug_unitig_0.1397, evm.model.Ug_unitig_0.1438, evm.model.Ug_unitig_0.145, evm.model.Ug_unitig_0.1480, evm.model.Ug_unitig_0.1549, evm.model.Ug_unitig_0.1555, evm.model.Ug_unitig_0.1557, evm.model.Ug_unitig_0.1632, evm.model.Ug_unitig_0.1782, evm.model.Ug_unitig_0.1875, evm.model.Ug_unitig_0.1876, evm.model.Ug_unitig_0.1918, evm.model.Ug_unitig_0.2, evm.model.U…
GO:0005488	MF	e	2.48e-03	1903	2.10141	1	4973/8366	10332/17760	binding	1.30e-03	4973	evm.model.Ug_unitig_0.10, evm.model.Ug_unitig_0.1000, evm.model.Ug_unitig_0.1001, evm.model.Ug_unitig_0.1002, evm.model.Ug_unitig_0.1004, evm.model.Ug_unitig_0.1007, evm.model.Ug_unitig_0.1008, evm.model.Ug_unitig_0.1015, evm.model.Ug_unitig_0.1019, evm.model.Ug_unitig_0.1025, evm.model.Ug_unitig_0.1027, evm.model.Ug_unitig_0.1028, evm.model.Ug_unitig_0.1036, evm.model.Ug_unitig_0.1042, evm.model…
GO:0048511	BP	p	3.13e-03	84	7.09806	1	53/8366	156/17760	rhythmic process	9.27e-04	53	evm.model.Ug_unitig_0.1557, evm.model.Ug_unitig_0.2330, evm.model.Ug_unitig_0.498, evm.model.Ug_unitig_0.513, evm.model.Ug_unitig_0.633, evm.model.Ug_unitig_0.944, evm.model.Ug_unitig_22.167, evm.model.Ug_unitig_22.24, evm.model.Ug_unitig_22.307, evm.model.Ug_unitig_22.492, evm.model.Ug_unitig_22.668, evm.model.Ug_unitig_26.676, evm.model.Ug_unitig_27.564, evm.model.Ug_unitig_32.1037, evm.model.U…
GO:0007623	BP	p	3.13e-03	41	7.09806	2	53/8366	156/17760	circadian rhythm	9.27e-04	53	evm.model.Ug_unitig_0.1557, evm.model.Ug_unitig_0.2330, evm.model.Ug_unitig_0.498, evm.model.Ug_unitig_0.513, evm.model.Ug_unitig_0.633, evm.model.Ug_unitig_0.944, evm.model.Ug_unitig_22.167, evm.model.Ug_unitig_22.24, evm.model.Ug_unitig_22.307, evm.model.Ug_unitig_22.492, evm.model.Ug_unitig_22.668, evm.model.Ug_unitig_26.676, evm.model.Ug_unitig_27.564, evm.model.Ug_unitig_32.1037, evm.model.U…
GO:0042221	BP	p	3.91e-03	2467	4.14891	2	1322/8366	2978/17760	response to chemical	1.20e-03	1322	evm.model.Ug_unitig_0.1007, evm.model.Ug_unitig_0.1008, evm.model.Ug_unitig_0.1019, evm.model.Ug_unitig_0.1036, evm.model.Ug_unitig_0.1057, evm.model.Ug_unitig_0.1080, evm.model.Ug_unitig_0.1115, evm.model.Ug_unitig_0.1116, evm.model.Ug_unitig_0.114, evm.model.Ug_unitig_0.1148, evm.model.Ug_unitig_0.1191, evm.model.Ug_unitig_0.1192, evm.model.Ug_unitig_0.1221, evm.model.Ug_unitig_0.1248, evm.mode…
GO:0005515	MF	e	3.97e-03	969	2.9546	2	2162/8366	4402/17760	protein binding	2.18e-03	2162	evm.model.Ug_unitig_0.1000, evm.model.Ug_unitig_0.1001, evm.model.Ug_unitig_0.1002, evm.model.Ug_unitig_0.1025, evm.model.Ug_unitig_0.1036, evm.model.Ug_unitig_0.1070, evm.model.Ug_unitig_0.1077, evm.model.Ug_unitig_0.1078, evm.model.Ug_unitig_0.108, evm.model.Ug_unitig_0.1092, evm.model.Ug_unitig_0.1104, evm.model.Ug_unitig_0.1123, evm.model.Ug_unitig_0.1124, evm.model.Ug_unitig_0.1148, evm.mode…
GO:0009719	BP	p	5.88e-03	564	4.71721	2	734/8366	1687/17760	response to endogenous stimulus	1.92e-03	734	evm.model.Ug_unitig_0.1019, evm.model.Ug_unitig_0.1057, evm.model.Ug_unitig_0.1115, evm.model.Ug_unitig_0.1116, evm.model.Ug_unitig_0.114, evm.model.Ug_unitig_0.1148, evm.model.Ug_unitig_0.1192, evm.model.Ug_unitig_0.1295, evm.model.Ug_unitig_0.1345, evm.model.Ug_unitig_0.1397, evm.model.Ug_unitig_0.1417, evm.model.Ug_unitig_0.142, evm.model.Ug_unitig_0.1438, evm.model.Ug_unitig_0.1462, evm.model…
GO:0009628	BP	p	5.88e-03	393	4.51261	2	909/8366	2070/17760	response to abiotic stimulus	1.99e-03	909	evm.model.Ug_unitig_0.1015, evm.model.Ug_unitig_0.108, evm.model.Ug_unitig_0.1080, evm.model.Ug_unitig_0.1115, evm.model.Ug_unitig_0.1192, evm.model.Ug_unitig_0.1204, evm.model.Ug_unitig_0.1209, evm.model.Ug_unitig_0.1248, evm.model.Ug_unitig_0.128, evm.model.Ug_unitig_0.1295, evm.model.Ug_unitig_0.1328, evm.model.Ug_unitig_0.1345, evm.model.Ug_unitig_0.1397, evm.model.Ug_unitig_0.1438, evm.model…
GO:0048869	BP	p	7.53e-03	2573	5.52252	2	315/8366	754/17760	cellular developmental process	2.84e-03	315	evm.model.Ug_unitig_0.10, evm.model.Ug_unitig_0.1000, evm.model.Ug_unitig_0.1078, evm.model.Ug_unitig_0.1148, evm.model.Ug_unitig_0.1295, evm.model.Ug_unitig_0.1301, evm.model.Ug_unitig_0.1417, evm.model.Ug_unitig_0.145, evm.model.Ug_unitig_0.1495, evm.model.Ug_unitig_0.1545, evm.model.Ug_unitig_0.1555, evm.model.Ug_unitig_0.2151, evm.model.Ug_unitig_0.2208, evm.model.Ug_unitig_0.2228, evm.model.…
GO:0030154	BP	p	7.53e-03	2428	5.52252	3	315/8366	754/17760	cell differentiation	2.84e-03	315	evm.model.Ug_unitig_0.10, evm.model.Ug_unitig_0.1000, evm.model.Ug_unitig_0.1078, evm.model.Ug_unitig_0.1148, evm.model.Ug_unitig_0.1295, evm.model.Ug_unitig_0.1301, evm.model.Ug_unitig_0.1417, evm.model.Ug_unitig_0.145, evm.model.Ug_unitig_0.1495, evm.model.Ug_unitig_0.1545, evm.model.Ug_unitig_0.1555, evm.model.Ug_unitig_0.2151, evm.model.Ug_unitig_0.2208, evm.model.Ug_unitig_0.2228, evm.model.…
GO:0006629	BP	e	1.22e-02	953	5.32899	3	473/8366	915/17760	lipid metabolic process	4.75e-03	473	evm.model.Ug_unitig_0.1042, evm.model.Ug_unitig_0.1058, evm.model.Ug_unitig_0.1059, evm.model.Ug_unitig_0.1096, evm.model.Ug_unitig_0.1168, evm.model.Ug_unitig_0.118, evm.model.Ug_unitig_0.1186, evm.model.Ug_unitig_0.1283, evm.model.Ug_unitig_0.1341, evm.model.Ug_unitig_0.1347, evm.model.Ug_unitig_0.1438, evm.model.Ug_unitig_0.1442, evm.model.Ug_unitig_0.1484, evm.model.Ug_unitig_0.1516, evm.mode…
GO:0007049	BP	p	1.26e-02	937	5.66787	2	272/8366	652/17760	cell cycle	5.12e-03	272	evm.model.Ug_unitig_0.1044, evm.model.Ug_unitig_0.1204, evm.model.Ug_unitig_0.1235, evm.model.Ug_unitig_0.1328, evm.model.Ug_unitig_0.1393, evm.model.Ug_unitig_0.1763, evm.model.Ug_unitig_0.1940, evm.model.Ug_unitig_0.2008, evm.model.Ug_unitig_0.2103, evm.model.Ug_unitig_0.2240, evm.model.Ug_unitig_0.2242, evm.model.Ug_unitig_0.2313, evm.model.Ug_unitig_0.2534, evm.model.Ug_unitig_0.255, evm.mode…
GO:0015979	BP	p	1.26e-02	38	6.76342	3	82/8366	218/17760	photosynthesis	5.04e-03	82	evm.model.Ug_unitig_0.1283, evm.model.Ug_unitig_0.1345, evm.model.Ug_unitig_0.1354, evm.model.Ug_unitig_0.845, evm.model.Ug_unitig_21.236, evm.model.Ug_unitig_21.751, evm.model.Ug_unitig_22.1032, evm.model.Ug_unitig_22.1422, evm.model.Ug_unitig_22.154, evm.model.Ug_unitig_22.372, evm.model.Ug_unitig_26.1175, evm.model.Ug_unitig_26.86, evm.model.Ug_unitig_27.134, evm.model.Ug_unitig_32.828, evm.mo…
GO:0040007	BP	p	1.30e-02	432	5.62435	1	285/8366	681/17760	growth	5.42e-03	285	evm.model.Ug_unitig_0.10, evm.model.Ug_unitig_0.1000, evm.model.Ug_unitig_0.1078, evm.model.Ug_unitig_0.1116, evm.model.Ug_unitig_0.1192, evm.model.Ug_unitig_0.145, evm.model.Ug_unitig_0.1495, evm.model.Ug_unitig_0.1549, evm.model.Ug_unitig_0.1753, evm.model.Ug_unitig_0.1875, evm.model.Ug_unitig_0.1876, evm.model.Ug_unitig_0.2014, evm.model.Ug_unitig_0.2263, evm.model.Ug_unitig_0.2275, evm.model.…
GO:0005634	CC	p	1.85e-02	517	5.54308	5	130/8366	334/17760	nucleus	2.76e-03	130	evm.model.Ug_unitig_0.1204, evm.model.Ug_unitig_0.128, evm.model.Ug_unitig_0.1363, evm.model.Ug_unitig_0.1496, evm.model.Ug_unitig_0.1836, evm.model.Ug_unitig_0.1940, evm.model.Ug_unitig_0.255, evm.model.Ug_unitig_0.260, evm.model.Ug_unitig_0.276, evm.model.Ug_unitig_0.444, evm.model.Ug_unitig_0.48, evm.model.Ug_unitig_0.492, evm.model.Ug_unitig_0.521, evm.model.Ug_unitig_0.522, evm.model.Ug_unit…
GO:0005575	CC	e	2.06e-02	4212	1.91182	0	6027/8366	12612/17760	cellular_component	4.38e-03	6027	evm.model.Ug_unitig_0.10, evm.model.Ug_unitig_0.1000, evm.model.Ug_unitig_0.1002, evm.model.Ug_unitig_0.1004, evm.model.Ug_unitig_0.1007, evm.model.Ug_unitig_0.1008, evm.model.Ug_unitig_0.1015, evm.model.Ug_unitig_0.1018, evm.model.Ug_unitig_0.1020, evm.model.Ug_unitig_0.1027, evm.model.Ug_unitig_0.1028, evm.model.Ug_unitig_0.1031, evm.model.Ug_unitig_0.1036, evm.model.Ug_unitig_0.1042, evm.model…
GO:0044422	CC	p	2.16e-02	1634	4.34211	1	479/8366	1110/17760	organelle part	6.88e-03	479	evm.model.Ug_unitig_0.1036, evm.model.Ug_unitig_0.1077, evm.model.Ug_unitig_0.1089, evm.model.Ug_unitig_0.1191, evm.model.Ug_unitig_0.1247, evm.model.Ug_unitig_0.1280, evm.model.Ug_unitig_0.1340, evm.model.Ug_unitig_0.139, evm.model.Ug_unitig_0.144, evm.model.Ug_unitig_0.1513, evm.model.Ug_unitig_0.162, evm.model.Ug_unitig_0.1631, evm.model.Ug_unitig_0.1660, evm.model.Ug_unitig_0.1729, evm.model.…
GO:0044446	CC	p	2.16e-02	1473	4.34211	3	479/8366	1110/17760	intracellular organelle part	6.88e-03	479	evm.model.Ug_unitig_0.1036, evm.model.Ug_unitig_0.1077, evm.model.Ug_unitig_0.1089, evm.model.Ug_unitig_0.1191, evm.model.Ug_unitig_0.1247, evm.model.Ug_unitig_0.1280, evm.model.Ug_unitig_0.1340, evm.model.Ug_unitig_0.139, evm.model.Ug_unitig_0.144, evm.model.Ug_unitig_0.1513, evm.model.Ug_unitig_0.162, evm.model.Ug_unitig_0.1631, evm.model.Ug_unitig_0.1660, evm.model.Ug_unitig_0.1729, evm.model.…
GO:0005794	CC	e	2.16e-02	45	5.15371	5	262/8366	493/17760	Golgi apparatus	6.91e-03	262	evm.model.Ug_unitig_0.1002, evm.model.Ug_unitig_0.1189, evm.model.Ug_unitig_0.1347, evm.model.Ug_unitig_0.1360, evm.model.Ug_unitig_0.1464, evm.model.Ug_unitig_0.1495, evm.model.Ug_unitig_0.1583, evm.model.Ug_unitig_0.1908, evm.model.Ug_unitig_0.1947, evm.model.Ug_unitig_0.1981, evm.model.Ug_unitig_0.1986, evm.model.Ug_unitig_0.2014, evm.model.Ug_unitig_0.2094, evm.model.Ug_unitig_0.2184, evm.mod…
GO:0044428	CC	p	2.16e-02	496	4.34211	4	479/8366	1110/17760	nuclear part	6.88e-03	479	evm.model.Ug_unitig_0.1036, evm.model.Ug_unitig_0.1077, evm.model.Ug_unitig_0.1089, evm.model.Ug_unitig_0.1191, evm.model.Ug_unitig_0.1247, evm.model.Ug_unitig_0.1280, evm.model.Ug_unitig_0.1340, evm.model.Ug_unitig_0.139, evm.model.Ug_unitig_0.144, evm.model.Ug_unitig_0.1513, evm.model.Ug_unitig_0.162, evm.model.Ug_unitig_0.1631, evm.model.Ug_unitig_0.1660, evm.model.Ug_unitig_0.1729, evm.model.…
GO:0005730	CC	p	2.16e-02	26	5.08892	5	216/8366	526/17760	nucleolus	5.18e-03	216	evm.model.Ug_unitig_0.1036, evm.model.Ug_unitig_0.1077, evm.model.Ug_unitig_0.1280, evm.model.Ug_unitig_0.139, evm.model.Ug_unitig_0.144, evm.model.Ug_unitig_0.162, evm.model.Ug_unitig_0.1660, evm.model.Ug_unitig_0.2121, evm.model.Ug_unitig_0.2172, evm.model.Ug_unitig_0.2263, evm.model.Ug_unitig_0.228, evm.model.Ug_unitig_0.25, evm.model.Ug_unitig_0.265, evm.model.Ug_unitig_0.581, evm.model.Ug_un…
GO:0006091	BP	p	2.33e-02	225	6.03202	3	186/8366	453/17760	generation of precursor metabolites and energy	9.97e-03	186	evm.model.Ug_unitig_0.1242, evm.model.Ug_unitig_0.1345, evm.model.Ug_unitig_0.1354, evm.model.Ug_unitig_0.2410, evm.model.Ug_unitig_0.329, evm.model.Ug_unitig_0.399, evm.model.Ug_unitig_0.422, evm.model.Ug_unitig_0.440, evm.model.Ug_unitig_0.478, evm.model.Ug_unitig_0.590, evm.model.Ug_unitig_0.624, evm.model.Ug_unitig_0.682, evm.model.Ug_unitig_21.207, evm.model.Ug_unitig_21.236, evm.model.Ug_un…
GO:0044424	CC	p	2.75e-02	2384	2.42122	2	3484/8366	7578/17760	intracellular part	9.36e-03	3484	evm.model.Ug_unitig_0.1000, evm.model.Ug_unitig_0.1002, evm.model.Ug_unitig_0.1004, evm.model.Ug_unitig_0.1008, evm.model.Ug_unitig_0.1020, evm.model.Ug_unitig_0.1031, evm.model.Ug_unitig_0.1036, evm.model.Ug_unitig_0.1042, evm.model.Ug_unitig_0.1049, evm.model.Ug_unitig_0.105, evm.model.Ug_unitig_0.1054, evm.model.Ug_unitig_0.1057, evm.model.Ug_unitig_0.106, evm.model.Ug_unitig_0.1070, evm.model…

## Sheet: Urenif PROXIMAL
go-basic.obo: fmt(1.2) rel(2019-06-10) 47,442 GO Terms; optional_attrs(relationship)
goslim_plant.obo: fmt(1.2) rel(None) 156 GO Terms
Sections: goatools.test_data.sections.data2018_07_find_enrichment
phosph
GO	NS	enrichment	p_fdr_bh	dcnt	tinfo	depth	ratio_in_study	ratio_in_pop	name	p_uncorrected	study_count	study_items
GO:0016772	MF	e	5.88e-05	601	4.10353	3	121/983	2206/27751	transferase activity, transferring phosphorus-containing groups	4.48e-06	121	evm.model.scaffold101_size679088.33, evm.model.scaffold101_size679088.34, evm.model.scaffold101_size679088.35, evm.model.scaffold101_size679088.41, evm.model.scaffold101_size679088.44, evm.model.scaffold101_size679088.49, evm.model.scaffold105_size659173.12, evm.model.scaffold105_size659173.6, evm.model.scaffold106_size656854.38, evm.model.scaffold107_size656107.104, evm.model.scaffold10_size1516…
GO:0016301	MF	e	5.88e-05	352	4.10353	4	121/983	2206/27751	kinase activity	4.48e-06	121	evm.model.scaffold101_size679088.33, evm.model.scaffold101_size679088.34, evm.model.scaffold101_size679088.35, evm.model.scaffold101_size679088.41, evm.model.scaffold101_size679088.44, evm.model.scaffold101_size679088.49, evm.model.scaffold105_size659173.12, evm.model.scaffold105_size659173.6, evm.model.scaffold106_size656854.38, evm.model.scaffold107_size656107.104, evm.model.scaffold10_size1516…
Broad
GO:1901360	BP	p	1.02e-04	3874	3.85383	3	156/983	6289/27751	organic cyclic compound metabolic process	5.44e-06	156	evm.model.scaffold100_size686073.77, evm.model.scaffold100_size686073.81, evm.model.scaffold102_size677817.176, evm.model.scaffold104_size664890.27, evm.model.scaffold104_size664890.29, evm.model.scaffold106_size656854.38, evm.model.scaffold107_size656107.113, evm.model.scaffold107_size656107.116, evm.model.scaffold107_size656107.131, evm.model.scaffold110_size649966.139, evm.model.scaffold111_si…
GO:0034641	BP	p	1.02e-04	3512	3.76169	3	174/983	6896/27751	cellular nitrogen compound metabolic process	6.24e-06	174	evm.model.scaffold100_size686073.77, evm.model.scaffold100_size686073.81, evm.model.scaffold102_size677817.176, evm.model.scaffold104_size664890.27, evm.model.scaffold104_size664890.29, evm.model.scaffold106_size656854.38, evm.model.scaffold107_size656107.113, evm.model.scaffold107_size656107.116, evm.model.scaffold107_size656107.131, evm.model.scaffold110_size649966.139, evm.model.scaffold111_si…
GO:0006725	BP	p	1.02e-04	3345	3.85383	3	156/983	6289/27751	cellular aromatic compound metabolic process	5.44e-06	156	evm.model.scaffold100_size686073.77, evm.model.scaffold100_size686073.81, evm.model.scaffold102_size677817.176, evm.model.scaffold104_size664890.27, evm.model.scaffold104_size664890.29, evm.model.scaffold106_size656854.38, evm.model.scaffold107_size656107.113, evm.model.scaffold107_size656107.116, evm.model.scaffold107_size656107.131, evm.model.scaffold110_size649966.139, evm.model.scaffold111_si…
GO:0046483	BP	p	1.02e-04	3260	3.85383	3	156/983	6289/27751	heterocycle metabolic process	5.44e-06	156	evm.model.scaffold100_size686073.77, evm.model.scaffold100_size686073.81, evm.model.scaffold102_size677817.176, evm.model.scaffold104_size664890.27, evm.model.scaffold104_size664890.29, evm.model.scaffold106_size656854.38, evm.model.scaffold107_size656107.113, evm.model.scaffold107_size656107.116, evm.model.scaffold107_size656107.131, evm.model.scaffold110_size649966.139, evm.model.scaffold111_si…
GO:0019748	BP	e	1.02e-04	578	6.28322	2	45/983	554/27751	secondary metabolic process	1.95e-06	45	evm.model.scaffold1001_size25237.3, evm.model.scaffold1001_size25237.6, evm.model.scaffold106_size656854.163, evm.model.scaffold107_size656107.154, evm.model.scaffold117_size639039.45, evm.model.scaffold121_size616638.92, evm.model.scaffold135_size590554.129, evm.model.scaffold135_size590554.137, evm.model.scaffold147_size561064.66, evm.model.scaffold150_size559803.25, evm.model.scaffold150_size5…
GO:0006807	BP	p	3.11e-04	6139	3.28317	2	330/983	11128/27751	nitrogen compound metabolic process	2.53e-05	330	evm.model.scaffold100_size686073.77, evm.model.scaffold100_size686073.81, evm.model.scaffold101_size679088.33, evm.model.scaffold101_size679088.35, evm.model.scaffold101_size679088.41, evm.model.scaffold101_size679088.44, evm.model.scaffold102_size677817.176, evm.model.scaffold104_size664890.27, evm.model.scaffold104_size664890.29, evm.model.scaffold105_size659173.12, evm.model.scaffold105_size65…
GO:0071704	BP	p	8.08e-04	9043	3.10344	2	411/983	13319/27751	organic substance metabolic process	8.25e-05	411	evm.model.scaffold1001_size25237.3, evm.model.scaffold1001_size25237.6, evm.model.scaffold100_size686073.77, evm.model.scaffold100_size686073.81, evm.model.scaffold101_size679088.33, evm.model.scaffold101_size679088.35, evm.model.scaffold101_size679088.41, evm.model.scaffold101_size679088.44, evm.model.scaffold102_size677817.176, evm.model.scaffold104_size664890.27, evm.model.scaffold104_size6648…
GO:0044238	BP	p	8.08e-04	6646	3.10344	2	411/983	13319/27751	primary metabolic process	8.25e-05	411	evm.model.scaffold1001_size25237.3, evm.model.scaffold1001_size25237.6, evm.model.scaffold100_size686073.77, evm.model.scaffold100_size686073.81, evm.model.scaffold101_size679088.33, evm.model.scaffold101_size679088.35, evm.model.scaffold101_size679088.41, evm.model.scaffold101_size679088.44, evm.model.scaffold102_size677817.176, evm.model.scaffold104_size664890.27, evm.model.scaffold104_size6648…
GO:0044237	BP	p	1.47e-02	8670	3.33037	2	330/983	10615/27751	cellular metabolic process	2.10e-03	330	evm.model.scaffold100_size686073.77, evm.model.scaffold100_size686073.81, evm.model.scaffold101_size679088.33, evm.model.scaffold101_size679088.35, evm.model.scaffold101_size679088.41, evm.model.scaffold101_size679088.44, evm.model.scaffold102_size677817.176, evm.model.scaffold104_size664890.27, evm.model.scaffold104_size664890.29, evm.model.scaffold105_size659173.12, evm.model.scaffold105_size65…
Misc.
GO	NS	enrichment	p_fdr_bh	dcnt	tinfo	depth	ratio_in_study	ratio_in_pop	name	p_uncorrected	study_count	study_items
GO:0003824	MF	e	5.88e-05	7519	2.24925	1	599/983	14090/27751	catalytic activity	6.14e-06	599	evm.model.scaffold1001_size25237.3, evm.model.scaffold1001_size25237.6, evm.model.scaffold101_size679088.104, evm.model.scaffold101_size679088.33, evm.model.scaffold101_size679088.34, evm.model.scaffold101_size679088.35, evm.model.scaffold101_size679088.36, evm.model.scaffold101_size679088.41, evm.model.scaffold101_size679088.44, evm.model.scaffold101_size679088.49, evm.model.scaffold1047_size216…
GO:0140110	MF	p	5.88e-05	29	4.05487	1	45/983	2316/27751	transcription regulator activity	7.35e-06	45	evm.model.scaffold104_size664890.27, evm.model.scaffold104_size664890.29, evm.model.scaffold107_size656107.113, evm.model.scaffold107_size656107.116, evm.model.scaffold148_size560834.16, evm.model.scaffold148_size560834.20, evm.model.scaffold157_size542792.27, evm.model.scaffold157_size542792.33, evm.model.scaffold187_size480904.101, evm.model.scaffold187_size480904.99, evm.model.scaffold207_size…
GO:0003700	MF	p	5.88e-05	8	4.15564	2	36/983	2094/27751	DNA-binding transcription factor activity	3.60e-06	36	evm.model.scaffold107_size656107.113, evm.model.scaffold107_size656107.116, evm.model.scaffold148_size560834.16, evm.model.scaffold148_size560834.20, evm.model.scaffold157_size542792.27, evm.model.scaffold157_size542792.33, evm.model.scaffold187_size480904.101, evm.model.scaffold187_size480904.99, evm.model.scaffold207_size453297.73, evm.model.scaffold235_size415264.28, evm.model.scaffold248_size…
GO:0006139	BP	p	1.02e-04	2463	3.85383	4	156/983	6289/27751	nucleobase-containing compound metabolic process	5.44e-06	156	evm.model.scaffold100_size686073.77, evm.model.scaffold100_size686073.81, evm.model.scaffold102_size677817.176, evm.model.scaffold104_size664890.27, evm.model.scaffold104_size664890.29, evm.model.scaffold106_size656854.38, evm.model.scaffold107_size656107.113, evm.model.scaffold107_size656107.116, evm.model.scaffold107_size656107.131, evm.model.scaffold110_size649966.139, evm.model.scaffold111_si…
GO:0016740	MF	e	1.67e-04	2462	3.06743	2	276/983	6217/27751	transferase activity	2.51e-05	276	evm.model.scaffold101_size679088.104, evm.model.scaffold101_size679088.33, evm.model.scaffold101_size679088.34, evm.model.scaffold101_size679088.35, evm.model.scaffold101_size679088.36, evm.model.scaffold101_size679088.41, evm.model.scaffold101_size679088.44, evm.model.scaffold101_size679088.49, evm.model.scaffold105_size659173.12, evm.model.scaffold105_size659173.6, evm.model.scaffold106_size656…
GO:0009791	BP	p	3.11e-04	381	4.8344	2	49/983	2359/27751	post-embryonic development	2.54e-05	49	evm.model.scaffold10_size1516488.250, evm.model.scaffold10_size1516488.252, evm.model.scaffold10_size1516488.5, evm.model.scaffold111_size649699.153, evm.model.scaffold143_size572353.116, evm.model.scaffold143_size572353.118, evm.model.scaffold150_size559803.146, evm.model.scaffold150_size559803.149, evm.model.scaffold161_size531985.122, evm.model.scaffold161_size531985.126, evm.model.scaffold16_…
GO:0032501	BP	p	1.60e-03	7576	4.39217	1	92/983	3671/27751	multicellular organismal process	1.79e-04	92	evm.model.scaffold106_size656854.38, evm.model.scaffold10_size1516488.250, evm.model.scaffold10_size1516488.252, evm.model.scaffold10_size1516488.5, evm.model.scaffold111_size649699.153, evm.model.scaffold124_size609810.143, evm.model.scaffold12_size1484567.165, evm.model.scaffold12_size1484567.167, evm.model.scaffold143_size572353.116, evm.model.scaffold143_size572353.118, evm.model.scaffold14_s…
GO:0036094	MF	e	2.71e-03	186	3.50842	2	180/983	4000/27751	small molecule binding	6.10e-04	180	evm.model.scaffold101_size679088.33, evm.model.scaffold101_size679088.35, evm.model.scaffold101_size679088.41, evm.model.scaffold101_size679088.44, evm.model.scaffold1047_size21624.2, evm.model.scaffold105_size659173.12, evm.model.scaffold105_size659173.6, evm.model.scaffold107_size656107.104, evm.model.scaffold10_size1516488.5, evm.model.scaffold114_size641222.164, evm.model.scaffold114_size6412…
GO:1901265	MF	e	2.71e-03	58	3.50967	3	180/983	3995/27751	nucleoside phosphate binding	6.05e-04	180	evm.model.scaffold101_size679088.33, evm.model.scaffold101_size679088.35, evm.model.scaffold101_size679088.41, evm.model.scaffold101_size679088.44, evm.model.scaffold1047_size21624.2, evm.model.scaffold105_size659173.12, evm.model.scaffold105_size659173.6, evm.model.scaffold107_size656107.104, evm.model.scaffold10_size1516488.5, evm.model.scaffold114_size641222.164, evm.model.scaffold114_size6412…
GO:0000166	MF	e	2.71e-03	56	3.50967	4	180/983	3995/27751	nucleotide binding	6.05e-04	180	evm.model.scaffold101_size679088.33, evm.model.scaffold101_size679088.35, evm.model.scaffold101_size679088.41, evm.model.scaffold101_size679088.44, evm.model.scaffold1047_size21624.2, evm.model.scaffold105_size659173.12, evm.model.scaffold105_size659173.6, evm.model.scaffold107_size656107.104, evm.model.scaffold10_size1516488.5, evm.model.scaffold114_size641222.164, evm.model.scaffold114_size6412…
GO:0003674	MF	e	3.03e-03	11075	1.72865	0	876/983	23714/27751	molecular_function	7.57e-04	876	evm.model.scaffold1001_size25237.3, evm.model.scaffold1001_size25237.6, evm.model.scaffold100_size686073.77, evm.model.scaffold100_size686073.81, evm.model.scaffold101_size679088.104, evm.model.scaffold101_size679088.21, evm.model.scaffold101_size679088.33, evm.model.scaffold101_size679088.34, evm.model.scaffold101_size679088.35, evm.model.scaffold101_size679088.36, evm.model.scaffold101_size6790…
GO:0009058	BP	p	4.82e-03	3649	3.67493	2	220/983	7521/27751	biosynthetic process	5.91e-04	220	evm.model.scaffold1001_size25237.3, evm.model.scaffold1001_size25237.6, evm.model.scaffold100_size686073.77, evm.model.scaffold100_size686073.81, evm.model.scaffold101_size679088.104, evm.model.scaffold102_size677817.176, evm.model.scaffold106_size656854.163, evm.model.scaffold106_size656854.38, evm.model.scaffold107_size656107.113, evm.model.scaffold107_size656107.116, evm.model.scaffold107_size…
GO:0008219	BP	e	9.34e-03	508	6.72546	2	25/983	356/27751	cell death	1.24e-03	25	evm.model.scaffold10_size1516488.5, evm.model.scaffold121_size616638.31, evm.model.scaffold121_size616638.33, evm.model.scaffold14_size1455245.13, evm.model.scaffold14_size1455245.15, evm.model.scaffold237_size412359.14, evm.model.scaffold237_size412359.22, evm.model.scaffold242_size401956.111, evm.model.scaffold242_size401956.115, evm.model.scaffold26_size1224954.102, evm.model.scaffold26_size12…
GO:0003676	MF	p	1.05e-02	328	3.08348	3	179/983	6118/27751	nucleic acid binding	2.89e-03	179	evm.model.scaffold101_size679088.21, evm.model.scaffold104_size664890.27, evm.model.scaffold104_size664890.29, evm.model.scaffold106_size656854.163, evm.model.scaffold107_size656107.113, evm.model.scaffold107_size656107.116, evm.model.scaffold107_size656107.131, evm.model.scaffold10_size1516488.250, evm.model.scaffold110_size649966.139, evm.model.scaffold110_size649966.154, evm.model.scaffold110_…
GO:0003682	MF	p	1.66e-02	8	6.18207	2	2/983	276/27751	chromatin binding	4.98e-03	2	evm.model.scaffold315_size338688.65, evm.model.scaffold315_size338688.67
GO:0003677	MF	p	1.95e-02	146	3.75849	4	84/983	3115/27751	DNA binding	6.32e-03	84	evm.model.scaffold104_size664890.27, evm.model.scaffold104_size664890.29, evm.model.scaffold107_size656107.113, evm.model.scaffold107_size656107.116, evm.model.scaffold111_size649699.148, evm.model.scaffold122_size611765.121, evm.model.scaffold122_size611765.123, evm.model.scaffold12_size1484567.140, evm.model.scaffold130_size602244.4, evm.model.scaffold130_size602244.6, evm.model.scaffold148_siz…

## Sheet: Ugibba PROXIMAL
go-basic.obo: fmt(1.2) rel(2019-06-10) 47,442 GO Terms; optional_attrs(relationship)
goslim_plant.obo: fmt(1.2) rel(None) 156 GO Terms
Sections: goatools.test_data.sections.data2018_07_find_enrichment
phosph
GO	NS	enrichment	p_fdr_bh	dcnt	tinfo	depth	ratio_in_study	ratio_in_pop	name	p_uncorrected	study_count	study_items
GO:0016772	MF	e	1.90e-02	601	4.14324	3	34/274	1341/17760	transferase activity, transferring phosphorus-containing groups	3.80e-03	34	evm.model.Ug_unitig_0.1175, evm.model.Ug_unitig_0.123, evm.model.Ug_unitig_0.1861, evm.model.Ug_unitig_0.1865, evm.model.Ug_unitig_0.1929, evm.model.Ug_unitig_21.325, evm.model.Ug_unitig_21.339, evm.model.Ug_unitig_22.397, evm.model.Ug_unitig_29.8, evm.model.Ug_unitig_32.571, evm.model.Ug_unitig_32.577, evm.model.Ug_unitig_32.578, evm.model.Ug_unitig_37.334, evm.model.Ug_unitig_37.335, evm.model.…
GO:0016301	MF	e	1.90e-02	352	4.14324	4	34/274	1341/17760	kinase activity	3.80e-03	34	evm.model.Ug_unitig_0.1175, evm.model.Ug_unitig_0.123, evm.model.Ug_unitig_0.1861, evm.model.Ug_unitig_0.1865, evm.model.Ug_unitig_0.1929, evm.model.Ug_unitig_21.325, evm.model.Ug_unitig_21.339, evm.model.Ug_unitig_22.397, evm.model.Ug_unitig_29.8, evm.model.Ug_unitig_32.571, evm.model.Ug_unitig_32.577, evm.model.Ug_unitig_32.578, evm.model.Ug_unitig_37.334, evm.model.Ug_unitig_37.335, evm.model.…
Broad
GO	NS	enrichment	p_fdr_bh	dcnt	tinfo	depth	ratio_in_study	ratio_in_pop	name	p_uncorrected	study_count	study_items
GO:0044237	BP	p	4.34e-05	8670	3.3281	2	58/274	6767/17760	cellular metabolic process	3.10e-06	58	evm.model.Ug_unitig_0.1131, evm.model.Ug_unitig_0.121, evm.model.Ug_unitig_0.123, evm.model.Ug_unitig_0.1311, evm.model.Ug_unitig_0.1727, evm.model.Ug_unitig_0.1929, evm.model.Ug_unitig_0.1966, evm.model.Ug_unitig_0.748, evm.model.Ug_unitig_0.750, evm.model.Ug_unitig_21.325, evm.model.Ug_unitig_21.326, evm.model.Ug_unitig_21.339, evm.model.Ug_unitig_21.369, evm.model.Ug_unitig_21.371, evm.model.U…
GO:1901360	BP	p	4.34e-05	3874	3.84714	3	28/274	4027/17760	organic cyclic compound metabolic process	2.75e-06	28	evm.model.Ug_unitig_0.1966, evm.model.Ug_unitig_0.748, evm.model.Ug_unitig_0.750, evm.model.Ug_unitig_21.326, evm.model.Ug_unitig_21.369, evm.model.Ug_unitig_21.371, evm.model.Ug_unitig_26.102, evm.model.Ug_unitig_29.11, evm.model.Ug_unitig_29.8, evm.model.Ug_unitig_31.8, evm.model.Ug_unitig_32.518, evm.model.Ug_unitig_32.521, evm.model.Ug_unitig_37.374, evm.model.Ug_unitig_37.45, evm.model.Ug_un…
GO:0034641	BP	p	4.34e-05	3512	3.75447	3	31/274	4418/17760	cellular nitrogen compound metabolic process	2.81e-06	31	evm.model.Ug_unitig_0.1131, evm.model.Ug_unitig_0.1311, evm.model.Ug_unitig_0.1966, evm.model.Ug_unitig_0.748, evm.model.Ug_unitig_0.750, evm.model.Ug_unitig_21.326, evm.model.Ug_unitig_21.369, evm.model.Ug_unitig_21.371, evm.model.Ug_unitig_26.102, evm.model.Ug_unitig_29.11, evm.model.Ug_unitig_29.8, evm.model.Ug_unitig_31.8, evm.model.Ug_unitig_32.518, evm.model.Ug_unitig_32.521, evm.model.Ug_u…
GO:0006725	BP	p	4.34e-05	3345	3.84714	3	28/274	4027/17760	cellular aromatic compound metabolic process	2.75e-06	28	evm.model.Ug_unitig_0.1966, evm.model.Ug_unitig_0.748, evm.model.Ug_unitig_0.750, evm.model.Ug_unitig_21.326, evm.model.Ug_unitig_21.369, evm.model.Ug_unitig_21.371, evm.model.Ug_unitig_26.102, evm.model.Ug_unitig_29.11, evm.model.Ug_unitig_29.8, evm.model.Ug_unitig_31.8, evm.model.Ug_unitig_32.518, evm.model.Ug_unitig_32.521, evm.model.Ug_unitig_37.374, evm.model.Ug_unitig_37.45, evm.model.Ug_un…
GO:0046483	BP	p	4.34e-05	3260	3.84714	3	28/274	4027/17760	heterocycle metabolic process	2.75e-06	28	evm.model.Ug_unitig_0.1966, evm.model.Ug_unitig_0.748, evm.model.Ug_unitig_0.750, evm.model.Ug_unitig_21.326, evm.model.Ug_unitig_21.369, evm.model.Ug_unitig_21.371, evm.model.Ug_unitig_26.102, evm.model.Ug_unitig_29.11, evm.model.Ug_unitig_29.8, evm.model.Ug_unitig_31.8, evm.model.Ug_unitig_32.518, evm.model.Ug_unitig_32.521, evm.model.Ug_unitig_37.374, evm.model.Ug_unitig_37.45, evm.model.Ug_un…
GO:0019748	BP	e	4.34e-05	578	6.44413	2	19/274	300/17760	secondary metabolic process	1.03e-06	19	evm.model.Ug_unitig_0.1306, evm.model.Ug_unitig_22.1405, evm.model.Ug_unitig_22.1407, evm.model.Ug_unitig_22.593, evm.model.Ug_unitig_22.598, evm.model.Ug_unitig_22.848, evm.model.Ug_unitig_22.851, evm.model.Ug_unitig_37.45, evm.model.Ug_unitig_46.596, evm.model.Ug_unitig_46.598, evm.model.Ug_unitig_46.599, evm.model.Ug_unitig_62.455, evm.model.Ug_unitig_62.459, evm.model.Ug_unitig_699.540, evm.m…
GO:0006807	BP	p	4.45e-05	6139	3.28486	2	69/274	7066/17760	nitrogen compound metabolic process	3.63e-06	69	evm.model.Ug_unitig_0.1131, evm.model.Ug_unitig_0.121, evm.model.Ug_unitig_0.123, evm.model.Ug_unitig_0.1311, evm.model.Ug_unitig_0.1727, evm.model.Ug_unitig_0.1929, evm.model.Ug_unitig_0.1966, evm.model.Ug_unitig_0.748, evm.model.Ug_unitig_0.750, evm.model.Ug_unitig_21.325, evm.model.Ug_unitig_21.326, evm.model.Ug_unitig_21.339, evm.model.Ug_unitig_21.369, evm.model.Ug_unitig_21.371, evm.model.U…
GO:0044464	CC	p	3.41e-04	3335	2.18013	1	115/274	9644/17760	cell part	5.09e-05	115	evm.model.Ug_unitig_0.1131, evm.model.Ug_unitig_0.121, evm.model.Ug_unitig_0.123, evm.model.Ug_unitig_0.1306, evm.model.Ug_unitig_0.1307, evm.model.Ug_unitig_0.1308, evm.model.Ug_unitig_0.1311, evm.model.Ug_unitig_0.1727, evm.model.Ug_unitig_0.1865, evm.model.Ug_unitig_0.1966, evm.model.Ug_unitig_0.747, evm.model.Ug_unitig_0.815, evm.model.Ug_unitig_0.974, evm.model.Ug_unitig_0.977, evm.model.Ug_…
GO:0016020	CC	e	2.17e-03	1048	2.38532	1	150/274	7855/17760	membrane	4.61e-04	150	evm.model.Ug_unitig_0.1306, evm.model.Ug_unitig_0.1308, evm.model.Ug_unitig_0.1310, evm.model.Ug_unitig_0.1405, evm.model.Ug_unitig_0.1406, evm.model.Ug_unitig_0.1410, evm.model.Ug_unitig_0.1415, evm.model.Ug_unitig_0.1727, evm.model.Ug_unitig_0.1861, evm.model.Ug_unitig_0.1865, evm.model.Ug_unitig_0.1929, evm.model.Ug_unitig_0.1931, evm.model.Ug_unitig_0.351, evm.model.Ug_unitig_0.358, evm.model…
GO:0009987	BP	p	3.53e-03	18757	2.83375	1	142/274	11094/17760	cellular process	3.24e-04	142	evm.model.Ug_unitig_0.1131, evm.model.Ug_unitig_0.121, evm.model.Ug_unitig_0.123, evm.model.Ug_unitig_0.1306, evm.model.Ug_unitig_0.1307, evm.model.Ug_unitig_0.1308, evm.model.Ug_unitig_0.1311, evm.model.Ug_unitig_0.1727, evm.model.Ug_unitig_0.1929, evm.model.Ug_unitig_0.1966, evm.model.Ug_unitig_0.2125, evm.model.Ug_unitig_0.739, evm.model.Ug_unitig_0.742, evm.model.Ug_unitig_0.748, evm.model.Ug…
GO:0071840	BP	p	1.69e-02	3545	4.19144	1	26/274	2854/17760	cellular component organization or biogenesis	2.07e-03	26	evm.model.Ug_unitig_0.953, evm.model.Ug_unitig_0.955, evm.model.Ug_unitig_21.369, evm.model.Ug_unitig_21.371, evm.model.Ug_unitig_27.400, evm.model.Ug_unitig_29.10, evm.model.Ug_unitig_29.11, evm.model.Ug_unitig_29.8, evm.model.Ug_unitig_32.518, evm.model.Ug_unitig_32.521, evm.model.Ug_unitig_32.727, evm.model.Ug_unitig_37.333, evm.model.Ug_unitig_37.374, evm.model.Ug_unitig_52.529, evm.model.Ug_…
Misc.
GO	NS	enrichment	p_fdr_bh	dcnt	tinfo	depth	ratio_in_study	ratio_in_pop	name	p_uncorrected	study_count	study_items
GO:0044424	CC	p	4.08e-05	2384	2.42122	2	64/274	7578/17760	intracellular part	3.47e-06	64	evm.model.Ug_unitig_0.1131, evm.model.Ug_unitig_0.123, evm.model.Ug_unitig_0.1306, evm.model.Ug_unitig_0.1311, evm.model.Ug_unitig_0.1966, evm.model.Ug_unitig_0.747, evm.model.Ug_unitig_0.815, evm.model.Ug_unitig_0.974, evm.model.Ug_unitig_0.977, evm.model.Ug_unitig_21.326, evm.model.Ug_unitig_21.369, evm.model.Ug_unitig_21.371, evm.model.Ug_unitig_22.593, evm.model.Ug_unitig_22.598, evm.model.Ug…
GO:0043226	CC	p	4.08e-05	1957	2.86235	1	39/274	4875/17760	organelle	2.95e-06	39	evm.model.Ug_unitig_0.1131, evm.model.Ug_unitig_0.1306, evm.model.Ug_unitig_0.1311, evm.model.Ug_unitig_0.747, evm.model.Ug_unitig_0.815, evm.model.Ug_unitig_21.369, evm.model.Ug_unitig_21.371, evm.model.Ug_unitig_27.535, evm.model.Ug_unitig_31.5, evm.model.Ug_unitig_31.8, evm.model.Ug_unitig_32.712, evm.model.Ug_unitig_37.209, evm.model.Ug_unitig_37.212, evm.model.Ug_unitig_37.333, evm.model.Ug_…
GO:0043229	CC	p	4.08e-05	1784	2.86235	3	39/274	4875/17760	intracellular organelle	2.95e-06	39	evm.model.Ug_unitig_0.1131, evm.model.Ug_unitig_0.1306, evm.model.Ug_unitig_0.1311, evm.model.Ug_unitig_0.747, evm.model.Ug_unitig_0.815, evm.model.Ug_unitig_21.369, evm.model.Ug_unitig_21.371, evm.model.Ug_unitig_27.535, evm.model.Ug_unitig_31.5, evm.model.Ug_unitig_31.8, evm.model.Ug_unitig_32.712, evm.model.Ug_unitig_37.209, evm.model.Ug_unitig_37.212, evm.model.Ug_unitig_37.333, evm.model.Ug_…
GO:0044444	CC	p	4.08e-05	1270	2.80398	3	44/274	5168/17760	cytoplasmic part	3.18e-06	44	evm.model.Ug_unitig_0.1131, evm.model.Ug_unitig_0.1306, evm.model.Ug_unitig_0.1311, evm.model.Ug_unitig_0.1966, evm.model.Ug_unitig_0.747, evm.model.Ug_unitig_0.815, evm.model.Ug_unitig_21.326, evm.model.Ug_unitig_21.369, evm.model.Ug_unitig_21.371, evm.model.Ug_unitig_22.593, evm.model.Ug_unitig_22.598, evm.model.Ug_unitig_27.535, evm.model.Ug_unitig_31.5, evm.model.Ug_unitig_31.8, evm.model.Ug_…
GO:0006139	BP	p	4.34e-05	2463	3.84714	4	28/274	4027/17760	nucleobase-containing compound metabolic process	2.75e-06	28	evm.model.Ug_unitig_0.1966, evm.model.Ug_unitig_0.748, evm.model.Ug_unitig_0.750, evm.model.Ug_unitig_21.326, evm.model.Ug_unitig_21.369, evm.model.Ug_unitig_21.371, evm.model.Ug_unitig_26.102, evm.model.Ug_unitig_29.11, evm.model.Ug_unitig_29.8, evm.model.Ug_unitig_31.8, evm.model.Ug_unitig_32.518, evm.model.Ug_unitig_32.521, evm.model.Ug_unitig_37.374, evm.model.Ug_unitig_37.45, evm.model.Ug_un…
GO:0043227	CC	p	4.82e-05	1367	3.06218	2	31/274	3992/17760	membrane-bounded organelle	5.24e-06	31	evm.model.Ug_unitig_0.1306, evm.model.Ug_unitig_0.747, evm.model.Ug_unitig_0.815, evm.model.Ug_unitig_21.369, evm.model.Ug_unitig_21.371, evm.model.Ug_unitig_27.535, evm.model.Ug_unitig_31.5, evm.model.Ug_unitig_31.8, evm.model.Ug_unitig_32.712, evm.model.Ug_unitig_37.209, evm.model.Ug_unitig_37.212, evm.model.Ug_unitig_578.660, evm.model.Ug_unitig_578.665, evm.model.Ug_unitig_578.733, evm.model.…
GO:0043231	CC	p	4.82e-05	1050	3.08523	4	30/274	3901/17760	intracellular membrane-bounded organelle	6.15e-06	30	evm.model.Ug_unitig_0.1306, evm.model.Ug_unitig_0.815, evm.model.Ug_unitig_21.369, evm.model.Ug_unitig_21.371, evm.model.Ug_unitig_27.535, evm.model.Ug_unitig_31.5, evm.model.Ug_unitig_31.8, evm.model.Ug_unitig_32.712, evm.model.Ug_unitig_37.209, evm.model.Ug_unitig_37.212, evm.model.Ug_unitig_578.660, evm.model.Ug_unitig_578.665, evm.model.Ug_unitig_578.733, evm.model.Ug_unitig_61.274, evm.model…
GO:0003824	MF	e	1.18e-04	7519	2.26795	1	192/274	8747/17760	catalytic activity	4.34e-06	192	evm.model.Ug_unitig_0.1175, evm.model.Ug_unitig_0.121, evm.model.Ug_unitig_0.123, evm.model.Ug_unitig_0.1306, evm.model.Ug_unitig_0.1307, evm.model.Ug_unitig_0.1308, evm.model.Ug_unitig_0.1310, evm.model.Ug_unitig_0.1405, evm.model.Ug_unitig_0.1406, evm.model.Ug_unitig_0.1410, evm.model.Ug_unitig_0.1415, evm.model.Ug_unitig_0.1727, evm.model.Ug_unitig_0.1861, evm.model.Ug_unitig_0.1865, evm.model…
GO:0016740	MF	e	1.18e-04	2462	3.08314	2	93/274	3871/17760	transferase activity	5.88e-06	93	evm.model.Ug_unitig_0.1175, evm.model.Ug_unitig_0.123, evm.model.Ug_unitig_0.1861, evm.model.Ug_unitig_0.1865, evm.model.Ug_unitig_0.1929, evm.model.Ug_unitig_0.1931, evm.model.Ug_unitig_0.404, evm.model.Ug_unitig_0.953, evm.model.Ug_unitig_0.955, evm.model.Ug_unitig_21.325, evm.model.Ug_unitig_21.339, evm.model.Ug_unitig_21.70, evm.model.Ug_unitig_21.89, evm.model.Ug_unitig_22.1405, evm.model.Ug…
GO:0009536	CC	p	9.81e-04	137	3.73695	5	13/274	2033/17760	plastid	1.67e-04	13	evm.model.Ug_unitig_0.1306, evm.model.Ug_unitig_0.815, evm.model.Ug_unitig_21.369, evm.model.Ug_unitig_21.371, evm.model.Ug_unitig_27.535, evm.model.Ug_unitig_31.8, evm.model.Ug_unitig_32.712, evm.model.Ug_unitig_699.332, evm.model.Ug_unitig_744.71, evm.model.Ug_unitig_8.1642, evm.model.Ug_unitig_85.185, evm.model.Ug_unitig_85.187, evm.model.Ug_unitig_899.115
GO:0009507	CC	p	2.11e-03	49	3.78018	6	13/274	1947/17760	chloroplast	4.03e-04	13	evm.model.Ug_unitig_0.1306, evm.model.Ug_unitig_0.815, evm.model.Ug_unitig_21.369, evm.model.Ug_unitig_21.371, evm.model.Ug_unitig_27.535, evm.model.Ug_unitig_31.8, evm.model.Ug_unitig_32.712, evm.model.Ug_unitig_699.332, evm.model.Ug_unitig_744.71, evm.model.Ug_unitig_8.1642, evm.model.Ug_unitig_85.185, evm.model.Ug_unitig_85.187, evm.model.Ug_unitig_899.115
GO:0044422	CC	p	3.31e-03	1634	4.34211	1	5/274	1110/17760	organelle part	9.17e-04	5	evm.model.Ug_unitig_0.1131, evm.model.Ug_unitig_37.374, evm.model.Ug_unitig_748.978, evm.model.Ug_unitig_899.449, evm.model.Ug_unitig_899.451
GO:0044446	CC	p	3.31e-03	1473	4.34211	3	5/274	1110/17760	intracellular organelle part	9.17e-04	5	evm.model.Ug_unitig_0.1131, evm.model.Ug_unitig_37.374, evm.model.Ug_unitig_748.978, evm.model.Ug_unitig_899.449, evm.model.Ug_unitig_899.451
GO:0044428	CC	p	3.31e-03	496	4.34211	4	5/274	1110/17760	nuclear part	9.17e-04	5	evm.model.Ug_unitig_0.1131, evm.model.Ug_unitig_37.374, evm.model.Ug_unitig_748.978, evm.model.Ug_unitig_899.449, evm.model.Ug_unitig_899.451
GO:0006629	BP	e	4.92e-03	953	5.32899	3	28/274	915/17760	lipid metabolic process	5.02e-04	28	evm.model.Ug_unitig_0.1306, evm.model.Ug_unitig_0.1307, evm.model.Ug_unitig_0.1308, evm.model.Ug_unitig_0.1861, evm.model.Ug_unitig_0.1865, evm.model.Ug_unitig_31.8, evm.model.Ug_unitig_37.155, evm.model.Ug_unitig_37.379, evm.model.Ug_unitig_46.407, evm.model.Ug_unitig_46.409, evm.model.Ug_unitig_46.410, evm.model.Ug_unitig_46.775, evm.model.Ug_unitig_46.777, evm.model.Ug_unitig_51.6, evm.model.U…
GO:0003677	MF	p	1.26e-02	146	3.68618	4	16/274	2118/17760	DNA binding	9.43e-04	16	evm.model.Ug_unitig_0.1966, evm.model.Ug_unitig_0.748, evm.model.Ug_unitig_0.750, evm.model.Ug_unitig_21.369, evm.model.Ug_unitig_37.374, evm.model.Ug_unitig_37.45, evm.model.Ug_unitig_46.406, evm.model.Ug_unitig_46.600, evm.model.Ug_unitig_578.610, evm.model.Ug_unitig_578.618, evm.model.Ug_unitig_736.168, evm.model.Ug_unitig_736.498, evm.model.Ug_unitig_748.1306, evm.model.Ug_unitig_899.449, evm…
GO:0005829	CC	p	1.46e-02	87	3.86873	4	14/274	1782/17760	cytosol	4.36e-03	14	evm.model.Ug_unitig_0.1966, evm.model.Ug_unitig_21.326, evm.model.Ug_unitig_22.593, evm.model.Ug_unitig_22.598, evm.model.Ug_unitig_31.5, evm.model.Ug_unitig_32.712, evm.model.Ug_unitig_37.334, evm.model.Ug_unitig_37.335, evm.model.Ug_unitig_37.337, evm.model.Ug_unitig_578.577, evm.model.Ug_unitig_747.198, evm.model.Ug_unitig_748.878, evm.model.Ug_unitig_8.926, evm.model.Ug_unitig_899.444
GO:0016043	BP	p	1.69e-02	3363	4.19144	2	26/274	2854/17760	cellular component organization	2.07e-03	26	evm.model.Ug_unitig_0.953, evm.model.Ug_unitig_0.955, evm.model.Ug_unitig_21.369, evm.model.Ug_unitig_21.371, evm.model.Ug_unitig_27.400, evm.model.Ug_unitig_29.10, evm.model.Ug_unitig_29.11, evm.model.Ug_unitig_29.8, evm.model.Ug_unitig_32.518, evm.model.Ug_unitig_32.521, evm.model.Ug_unitig_32.727, evm.model.Ug_unitig_37.333, evm.model.Ug_unitig_37.374, evm.model.Ug_unitig_52.529, evm.model.Ug_…
GO:0005515	MF	p	1.85e-02	969	2.9546	2	46/274	4402/17760	protein binding	1.85e-03	46	evm.model.Ug_unitig_0.1865, evm.model.Ug_unitig_0.748, evm.model.Ug_unitig_0.750, evm.model.Ug_unitig_0.815, evm.model.Ug_unitig_2.8, evm.model.Ug_unitig_22.320, evm.model.Ug_unitig_22.60, evm.model.Ug_unitig_26.102, evm.model.Ug_unitig_26.99, evm.model.Ug_unitig_27.400, evm.model.Ug_unitig_29.10, evm.model.Ug_unitig_29.8, evm.model.Ug_unitig_32.307, evm.model.Ug_unitig_32.571, evm.model.Ug_uniti…
GO:0005488	MF	p	1.90e-02	1903	2.10141	1	135/274	10332/17760	binding	3.00e-03	135	evm.model.Ug_unitig_0.121, evm.model.Ug_unitig_0.123, evm.model.Ug_unitig_0.1306, evm.model.Ug_unitig_0.1307, evm.model.Ug_unitig_0.1308, evm.model.Ug_unitig_0.1310, evm.model.Ug_unitig_0.1405, evm.model.Ug_unitig_0.1406, evm.model.Ug_unitig_0.1410, evm.model.Ug_unitig_0.1415, evm.model.Ug_unitig_0.1865, evm.model.Ug_unitig_0.1929, evm.model.Ug_unitig_0.1966, evm.model.Ug_unitig_0.2125, evm.model…
GO:0140110	MF	p	1.90e-02	29	3.93286	1	12/274	1655/17760	transcription regulator activity	3.13e-03	12	evm.model.Ug_unitig_0.1966, evm.model.Ug_unitig_0.748, evm.model.Ug_unitig_0.750, evm.model.Ug_unitig_37.334, evm.model.Ug_unitig_37.335, evm.model.Ug_unitig_37.337, evm.model.Ug_unitig_37.45, evm.model.Ug_unitig_48.5, evm.model.Ug_unitig_578.618, evm.model.Ug_unitig_736.498, evm.model.Ug_unitig_748.1306, evm.model.Ug_unitig_8.914
GO:0003700	MF	p	1.98e-02	8	4.01466	2	11/274	1525/17760	DNA-binding transcription factor activity	4.46e-03	11	evm.model.Ug_unitig_0.1966, evm.model.Ug_unitig_0.748, evm.model.Ug_unitig_0.750, evm.model.Ug_unitig_37.334, evm.model.Ug_unitig_37.335, evm.model.Ug_unitig_37.337, evm.model.Ug_unitig_37.45, evm.model.Ug_unitig_578.618, evm.model.Ug_unitig_736.498, evm.model.Ug_unitig_748.1306, evm.model.Ug_unitig_8.914
GO:0043228	CC	p	2.82e-02	629	4.29032	2	8/274	1169/17760	non-membrane-bounded organelle	9.65e-03	8	evm.model.Ug_unitig_0.1131, evm.model.Ug_unitig_0.1311, evm.model.Ug_unitig_37.333, evm.model.Ug_unitig_37.334, evm.model.Ug_unitig_578.577, evm.model.Ug_unitig_748.978, evm.model.Ug_unitig_8.360, evm.model.Ug_unitig_88.118
GO:0043232	CC	p	2.82e-02	601	4.29032	4	8/274	1169/17760	intracellular non-membrane-bounded organelle	9.65e-03	8	evm.model.Ug_unitig_0.1131, evm.model.Ug_unitig_0.1311, evm.model.Ug_unitig_37.333, evm.model.Ug_unitig_37.334, evm.model.Ug_unitig_578.577, evm.model.Ug_unitig_748.978, evm.model.Ug_unitig_8.360, evm.model.Ug_unitig_88.118
GO:0005737	CC	p	2.82e-02	1275	3.63155	3	21/274	2259/17760	cytoplasm	1.02e-02	21	evm.model.Ug_unitig_0.123, evm.model.Ug_unitig_0.747, evm.model.Ug_unitig_0.974, evm.model.Ug_unitig_0.977, evm.model.Ug_unitig_29.8, evm.model.Ug_unitig_37.209, evm.model.Ug_unitig_37.212, evm.model.Ug_unitig_37.333, evm.model.Ug_unitig_578.550, evm.model.Ug_unitig_578.568, evm.model.Ug_unitig_578.569, evm.model.Ug_unitig_578.729, evm.model.Ug_unitig_578.733, evm.model.Ug_unitig_61.109, evm.mode…
GO:0005634	CC	p	2.92e-02	517	5.54308	5	0/274	334/17760	nucleus	1.12e-02	0
GO:0005576	CC	e	3.04e-02	181	5.50202	1	12/274	348/17760	extracellular region	1.23e-02	12	evm.model.Ug_unitig_22.593, evm.model.Ug_unitig_22.598, evm.model.Ug_unitig_27.175, evm.model.Ug_unitig_27.177, evm.model.Ug_unitig_32.519, evm.model.Ug_unitig_52.529, evm.model.Ug_unitig_52.531, evm.model.Ug_unitig_578.652, evm.model.Ug_unitig_578.660, evm.model.Ug_unitig_578.665, evm.model.Ug_unitig_747.585, evm.model.Ug_unitig_747.587
GO:0005730	CC	p	4.49e-02	26	5.08892	5	2/274	526/17760	nucleolus	1.91e-02	2	evm.model.Ug_unitig_0.1131, evm.model.Ug_unitig_748.978

## Sheet: Urenif TANDEM
go-basic.obo: fmt(1.2) rel(2019-06-10) 47,442 GO Terms; optional_attrs(relationship)
goslim_plant.obo: fmt(1.2) rel(None) 156 GO Terms
Sections: goatools.test_data.sections.data2018_07_find_enrichment
phosph
GO	NS	enrichment	p_fdr_bh	dcnt	tinfo	depth	ratio_in_study	ratio_in_pop	name	p_uncorrected	study_count	study_items
GO:0016772	MF	e	4.16e-02	601	4.10353	3	199/2113	2206/27751	transferase activity, transferring phosphorus-containing groups	1.07e-02	199	evm.model.scaffold1034_size22948.1, evm.model.scaffold1034_size22948.2, evm.model.scaffold1040_size21852.7, evm.model.scaffold1040_size21852.8, evm.model.scaffold105_size659173.88, evm.model.scaffold105_size659173.89, evm.model.scaffold106_size656854.39, evm.model.scaffold106_size656854.40, evm.model.scaffold106_size656854.41, evm.model.scaffold107_size656107.105, evm.model.scaffold107_size656107…
GO:0016301	MF	e	4.16e-02	352	4.10353	4	199/2113	2206/27751	kinase activity	1.07e-02	199	evm.model.scaffold1034_size22948.1, evm.model.scaffold1034_size22948.2, evm.model.scaffold1040_size21852.7, evm.model.scaffold1040_size21852.8, evm.model.scaffold105_size659173.88, evm.model.scaffold105_size659173.89, evm.model.scaffold106_size656854.39, evm.model.scaffold106_size656854.40, evm.model.scaffold106_size656854.41, evm.model.scaffold107_size656107.105, evm.model.scaffold107_size656107…
cellular_component
GO:0005739	CC	p	6.88e-05	95	5.38052	5	19/2113	616/27751	mitochondrion	4.93e-06	19	evm.model.scaffold1152_size15161.2, evm.model.scaffold1152_size15161.3, evm.model.scaffold121_size616638.140, evm.model.scaffold14_size1455245.276, evm.model.scaffold203_size463369.31, evm.model.scaffold203_size463369.34, evm.model.scaffold393_size271938.18, evm.model.scaffold39_size1053542.235, evm.model.scaffold423_size245578.28, evm.model.scaffold423_size245578.29, evm.model.scaffold43_size102…
GO:0000323	CC	e	4.65e-04	48	6.96748	6	23/2113	126/27751	lytic vacuole	1.19e-04	23	evm.model.scaffold153_size555728.96, evm.model.scaffold166_size521459.95, evm.model.scaffold189_size480584.94, evm.model.scaffold189_size480584.95, evm.model.scaffold208_size452143.28, evm.model.scaffold208_size452143.29, evm.model.scaffold208_size452143.30, evm.model.scaffold223_size435064.138, evm.model.scaffold251_size391187.63, evm.model.scaffold251_size391187.64, evm.model.scaffold286_size35…
Broad
GO	NS	enrichment	p_fdr_bh	dcnt	tinfo	depth	ratio_in_study	ratio_in_pop	name	p_uncorrected	study_count	study_items
GO:0044464	CC	p	6.88e-05	3335	2.17867	1	1009/2113	15140/27751	cell part	1.02e-05	1009	evm.model.scaffold1002_size25184.4, evm.model.scaffold1002_size25184.5, evm.model.scaffold100_size686073.43, evm.model.scaffold100_size686073.45, evm.model.scaffold1011_size24759.6, evm.model.scaffold1019_size23903.4, evm.model.scaffold1019_size23903.7, evm.model.scaffold101_size679088.14, evm.model.scaffold101_size679088.18, evm.model.scaffold102_size677817.111, evm.model.scaffold102_size677817.…
GO:0009987	BP	p	1.84e-04	18757	2.8421	1	1210/2113	17297/27751	cellular process	1.01e-05	1210	evm.model.scaffold1002_size25184.4, evm.model.scaffold1002_size25184.5, evm.model.scaffold100_size686073.43, evm.model.scaffold100_size686073.45, evm.model.scaffold100_size686073.46, evm.model.scaffold100_size686073.47, evm.model.scaffold1019_size23903.4, evm.model.scaffold1019_size23903.7, evm.model.scaffold101_size679088.110, evm.model.scaffold101_size679088.111, evm.model.scaffold101_size67908…
GO:0044237	BP	p	1.84e-04	8670	3.33037	2	702/2113	10615/27751	cellular metabolic process	9.57e-06	702	evm.model.scaffold1002_size25184.4, evm.model.scaffold1002_size25184.5, evm.model.scaffold100_size686073.43, evm.model.scaffold100_size686073.45, evm.model.scaffold100_size686073.46, evm.model.scaffold100_size686073.47, evm.model.scaffold102_size677817.126, evm.model.scaffold102_size677817.33, evm.model.scaffold102_size677817.36, evm.model.scaffold102_size677817.37, evm.model.scaffold1030_size234…
GO:1901360	BP	p	1.84e-04	3874	3.85383	3	398/2113	6289/27751	organic cyclic compound metabolic process	1.69e-05	398	evm.model.scaffold100_size686073.43, evm.model.scaffold100_size686073.45, evm.model.scaffold100_size686073.46, evm.model.scaffold100_size686073.47, evm.model.scaffold102_size677817.126, evm.model.scaffold102_size677817.33, evm.model.scaffold1030_size23415.2, evm.model.scaffold1030_size23415.3, evm.model.scaffold1040_size21852.7, evm.model.scaffold1040_size21852.8, evm.model.scaffold104_size664890…
GO:0034641	BP	p	1.84e-04	3512	3.76169	3	434/2113	6896/27751	cellular nitrogen compound metabolic process	9.46e-06	434	evm.model.scaffold100_size686073.43, evm.model.scaffold100_size686073.45, evm.model.scaffold100_size686073.46, evm.model.scaffold100_size686073.47, evm.model.scaffold102_size677817.126, evm.model.scaffold102_size677817.33, evm.model.scaffold1030_size23415.2, evm.model.scaffold1030_size23415.3, evm.model.scaffold1040_size21852.7, evm.model.scaffold1040_size21852.8, evm.model.scaffold104_size664890…
GO:0006725	BP	p	1.84e-04	3345	3.85383	3	398/2113	6289/27751	cellular aromatic compound metabolic process	1.69e-05	398	evm.model.scaffold100_size686073.43, evm.model.scaffold100_size686073.45, evm.model.scaffold100_size686073.46, evm.model.scaffold100_size686073.47, evm.model.scaffold102_size677817.126, evm.model.scaffold102_size677817.33, evm.model.scaffold1030_size23415.2, evm.model.scaffold1030_size23415.3, evm.model.scaffold1040_size21852.7, evm.model.scaffold1040_size21852.8, evm.model.scaffold104_size664890…
GO:0046483	BP	p	1.84e-04	3260	3.85383	3	398/2113	6289/27751	heterocycle metabolic process	1.69e-05	398	evm.model.scaffold100_size686073.43, evm.model.scaffold100_size686073.45, evm.model.scaffold100_size686073.46, evm.model.scaffold100_size686073.47, evm.model.scaffold102_size677817.126, evm.model.scaffold102_size677817.33, evm.model.scaffold1030_size23415.2, evm.model.scaffold1030_size23415.3, evm.model.scaffold1040_size21852.7, evm.model.scaffold1040_size21852.8, evm.model.scaffold104_size664890…
GO:0019748	BP	e	1.84e-04	578	6.28322	2	104/2113	554/27751	secondary metabolic process	2.17e-06	104	evm.model.scaffold100_size686073.47, evm.model.scaffold106_size656854.167, evm.model.scaffold106_size656854.168, evm.model.scaffold110_size649966.86, evm.model.scaffold110_size649966.87, evm.model.scaffold111_size649699.32, evm.model.scaffold111_size649699.64, evm.model.scaffold111_size649699.65, evm.model.scaffold121_size616638.11, evm.model.scaffold121_size616638.81, evm.model.scaffold121_size6…
GO:0030312	CC	e	3.32e-03	88	5.44766	2	65/2113	576/27751	external encapsulating structure	1.43e-03	65	evm.model.scaffold102_size677817.126, evm.model.scaffold102_size677817.162, evm.model.scaffold111_size649699.64, evm.model.scaffold111_size649699.65, evm.model.scaffold1147_size15341.2, evm.model.scaffold1147_size15341.3, evm.model.scaffold1152_size15161.2, evm.model.scaffold1152_size15161.3, evm.model.scaffold116_size639307.41, evm.model.scaffold116_size639307.42, evm.model.scaffold116_size63930…
GO:0016020	CC	e	3.32e-03	1048	2.41612	1	979/2113	11940/27751	membrane	1.48e-03	979	evm.model.scaffold1007_size24833.2, evm.model.scaffold100_size686073.45, evm.model.scaffold1011_size24759.6, evm.model.scaffold1019_size23903.4, evm.model.scaffold1019_size23903.7, evm.model.scaffold101_size679088.18, evm.model.scaffold1020_size23896.2, evm.model.scaffold1020_size23896.3, evm.model.scaffold102_size677817.111, evm.model.scaffold102_size677817.112, evm.model.scaffold102_size677817.…
GO:0006807	BP	p	3.36e-03	6139	3.28317	2	771/2113	11128/27751	nitrogen compound metabolic process	4.46e-04	771	evm.model.scaffold1002_size25184.4, evm.model.scaffold1002_size25184.5, evm.model.scaffold100_size686073.43, evm.model.scaffold100_size686073.45, evm.model.scaffold100_size686073.46, evm.model.scaffold100_size686073.47, evm.model.scaffold102_size677817.126, evm.model.scaffold102_size677817.33, evm.model.scaffold102_size677817.36, evm.model.scaffold102_size677817.37, evm.model.scaffold1030_size234…
GO:0005886	CC	e	2.87e-02	473	3.55054	2	330/2113	3840/27751	plasma membrane	1.53e-02	330	evm.model.scaffold1011_size24759.6, evm.model.scaffold1019_size23903.4, evm.model.scaffold1019_size23903.7, evm.model.scaffold102_size677817.126, evm.model.scaffold105_size659173.32, evm.model.scaffold105_size659173.88, evm.model.scaffold105_size659173.89, evm.model.scaffold106_size656854.39, evm.model.scaffold106_size656854.40, evm.model.scaffold106_size656854.41, evm.model.scaffold107_size65610…
Misc.
GO	NS	enrichment	p_fdr_bh	dcnt	tinfo	depth	ratio_in_study	ratio_in_pop	name	p_uncorrected	study_count	study_items
GO:0044424	CC	p	6.88e-05	2384	2.41319	2	734/2113	11975/27751	intracellular part	9.22e-06	734	evm.model.scaffold1002_size25184.4, evm.model.scaffold1002_size25184.5, evm.model.scaffold100_size686073.43, evm.model.scaffold100_size686073.45, evm.model.scaffold1011_size24759.6, evm.model.scaffold1019_size23903.4, evm.model.scaffold1019_size23903.7, evm.model.scaffold101_size679088.14, evm.model.scaffold101_size679088.18, evm.model.scaffold102_size677817.111, evm.model.scaffold102_size677817.…
GO:0043226	CC	p	6.88e-05	1957	2.85726	1	483/2113	7681/27751	organelle	9.43e-06	483	evm.model.scaffold100_size686073.43, evm.model.scaffold100_size686073.45, evm.model.scaffold1011_size24759.6, evm.model.scaffold102_size677817.111, evm.model.scaffold102_size677817.112, evm.model.scaffold102_size677817.116, evm.model.scaffold102_size677817.117, evm.model.scaffold102_size677817.126, evm.model.scaffold102_size677817.127, evm.model.scaffold102_size677817.33, evm.model.scaffold1035_s…
GO:0043229	CC	p	6.88e-05	1784	2.85726	3	483/2113	7681/27751	intracellular organelle	9.43e-06	483	evm.model.scaffold100_size686073.43, evm.model.scaffold100_size686073.45, evm.model.scaffold1011_size24759.6, evm.model.scaffold102_size677817.111, evm.model.scaffold102_size677817.112, evm.model.scaffold102_size677817.116, evm.model.scaffold102_size677817.117, evm.model.scaffold102_size677817.126, evm.model.scaffold102_size677817.127, evm.model.scaffold102_size677817.33, evm.model.scaffold1035_s…
GO:0044444	CC	p	6.88e-05	1270	2.81133	3	502/2113	8042/27751	cytoplasmic part	8.85e-06	502	evm.model.scaffold1002_size25184.4, evm.model.scaffold1002_size25184.5, evm.model.scaffold100_size686073.43, evm.model.scaffold100_size686073.45, evm.model.scaffold1011_size24759.6, evm.model.scaffold102_size677817.111, evm.model.scaffold102_size677817.112, evm.model.scaffold102_size677817.116, evm.model.scaffold102_size677817.117, evm.model.scaffold102_size677817.126, evm.model.scaffold102_size6…
GO:0005576	CC	e	6.88e-05	181	5.5461	1	82/2113	522/27751	extracellular region	2.36e-06	82	evm.model.scaffold113_size644116.7, evm.model.scaffold113_size644116.8, evm.model.scaffold116_size639307.41, evm.model.scaffold116_size639307.42, evm.model.scaffold116_size639307.47, evm.model.scaffold116_size639307.48, evm.model.scaffold121_size616638.63, evm.model.scaffold121_size616638.64, evm.model.scaffold125_size608205.20, evm.model.scaffold125_size608205.21, evm.model.scaffold128_size60635…
GO:0005634	CC	p	9.91e-05	517	5.43729	5	19/2113	582/27751	nucleus	1.69e-05	19	evm.model.scaffold102_size677817.126, evm.model.scaffold113_size644116.75, evm.model.scaffold113_size644116.77, evm.model.scaffold121_size616638.3, evm.model.scaffold152_size557608.66, evm.model.scaffold161_size531985.123, evm.model.scaffold172_size512938.108, evm.model.scaffold172_size512938.109, evm.model.scaffold17_size1411551.110, evm.model.scaffold17_size1411551.111, evm.model.scaffold406_si…
GO:0043227	CC	p	1.57e-04	1367	3.06199	2	399/2113	6259/27751	membrane-bounded organelle	3.00e-05	399	evm.model.scaffold100_size686073.43, evm.model.scaffold100_size686073.45, evm.model.scaffold1011_size24759.6, evm.model.scaffold102_size677817.111, evm.model.scaffold102_size677817.112, evm.model.scaffold102_size677817.116, evm.model.scaffold102_size677817.117, evm.model.scaffold102_size677817.126, evm.model.scaffold102_size677817.33, evm.model.scaffold1035_size22867.6, evm.model.scaffold105_size…
GO:0003676	MF	p	1.69e-04	328	3.08348	3	368/2113	6118/27751	nucleic acid binding	8.44e-06	368	evm.model.scaffold100_size686073.46, evm.model.scaffold100_size686073.47, evm.model.scaffold101_size679088.14, evm.model.scaffold101_size679088.18, evm.model.scaffold102_size677817.126, evm.model.scaffold1030_size23415.2, evm.model.scaffold1030_size23415.3, evm.model.scaffold1037_size22605.3, evm.model.scaffold1037_size22605.4, evm.model.scaffold104_size664890.101, evm.model.scaffold105_size65917…
GO:0003723	MF	p	1.69e-04	171	4.00231	4	117/2113	2441/27751	RNA binding	6.03e-06	117	evm.model.scaffold101_size679088.14, evm.model.scaffold101_size679088.18, evm.model.scaffold102_size677817.126, evm.model.scaffold105_size659173.30, evm.model.scaffold105_size659173.31, evm.model.scaffold105_size659173.32, evm.model.scaffold109_size652032.89, evm.model.scaffold109_size652032.90, evm.model.scaffold111_size649699.26, evm.model.scaffold111_size649699.60, evm.model.scaffold112_size64…
GO:0042221	BP	e	1.84e-04	2467	4.1705	2	424/2113	4582/27751	response to chemical	1.47e-05	424	evm.model.scaffold100_size686073.43, evm.model.scaffold100_size686073.45, evm.model.scaffold100_size686073.46, evm.model.scaffold100_size686073.47, evm.model.scaffold1019_size23903.4, evm.model.scaffold1019_size23903.7, evm.model.scaffold102_size677817.126, evm.model.scaffold102_size677817.162, evm.model.scaffold102_size677817.36, evm.model.scaffold102_size677817.37, evm.model.scaffold104_size664…
GO:0006139	BP	p	1.84e-04	2463	3.85383	4	398/2113	6289/27751	nucleobase-containing compound metabolic process	1.69e-05	398	evm.model.scaffold100_size686073.43, evm.model.scaffold100_size686073.45, evm.model.scaffold100_size686073.46, evm.model.scaffold100_size686073.47, evm.model.scaffold102_size677817.126, evm.model.scaffold102_size677817.33, evm.model.scaffold1030_size23415.2, evm.model.scaffold1030_size23415.3, evm.model.scaffold1040_size21852.7, evm.model.scaffold1040_size21852.8, evm.model.scaffold104_size664890…
GO:0043231	CC	p	4.41e-04	1050	3.08445	4	395/2113	6120/27751	intracellular membrane-bounded organelle	9.38e-05	395	evm.model.scaffold100_size686073.43, evm.model.scaffold100_size686073.45, evm.model.scaffold102_size677817.111, evm.model.scaffold102_size677817.112, evm.model.scaffold102_size677817.116, evm.model.scaffold102_size677817.117, evm.model.scaffold102_size677817.126, evm.model.scaffold102_size677817.33, evm.model.scaffold1035_size22867.6, evm.model.scaffold105_size659173.32, evm.model.scaffold105_siz…
GO:0005764	CC	e	4.65e-04	35	6.96748	7	23/2113	126/27751	lysosome	1.19e-04	23	evm.model.scaffold153_size555728.96, evm.model.scaffold166_size521459.95, evm.model.scaffold189_size480584.94, evm.model.scaffold189_size480584.95, evm.model.scaffold208_size452143.28, evm.model.scaffold208_size452143.29, evm.model.scaffold208_size452143.30, evm.model.scaffold223_size435064.138, evm.model.scaffold251_size391187.63, evm.model.scaffold251_size391187.64, evm.model.scaffold286_size35…
GO:0009719	BP	e	6.06e-04	564	4.71544	2	256/2113	2657/27751	response to endogenous stimulus	6.18e-05	256	evm.model.scaffold1019_size23903.4, evm.model.scaffold1019_size23903.7, evm.model.scaffold102_size677817.162, evm.model.scaffold102_size677817.36, evm.model.scaffold102_size677817.37, evm.model.scaffold105_size659173.49, evm.model.scaffold1096_size17718.2, evm.model.scaffold1096_size17718.3, evm.model.scaffold1109_size16905.3, evm.model.scaffold1109_size16905.4, evm.model.scaffold1147_size15341.2…
GO:0043228	CC	p	7.91e-04	629	4.25205	2	105/2113	1904/27751	non-membrane-bounded organelle	2.35e-04	105	evm.model.scaffold100_size686073.43, evm.model.scaffold100_size686073.45, evm.model.scaffold102_size677817.126, evm.model.scaffold102_size677817.127, evm.model.scaffold105_size659173.32, evm.model.scaffold107_size656107.75, evm.model.scaffold107_size656107.76, evm.model.scaffold111_size649699.60, evm.model.scaffold112_size645884.51, evm.model.scaffold112_size645884.52, evm.model.scaffold114_size6…
GO:0043232	CC	p	7.91e-04	601	4.25205	4	105/2113	1904/27751	intracellular non-membrane-bounded organelle	2.35e-04	105	evm.model.scaffold100_size686073.43, evm.model.scaffold100_size686073.45, evm.model.scaffold102_size677817.126, evm.model.scaffold102_size677817.127, evm.model.scaffold105_size659173.32, evm.model.scaffold107_size656107.75, evm.model.scaffold107_size656107.76, evm.model.scaffold111_size649699.60, evm.model.scaffold112_size645884.51, evm.model.scaffold112_size645884.52, evm.model.scaffold114_size6…
GO:0032991	CC	p	9.31e-04	2121	5.52712	1	20/2113	532/27751	protein-containing complex	3.53e-04	20	evm.model.scaffold105_size659173.32, evm.model.scaffold114_size641222.149, evm.model.scaffold121_size616638.140, evm.model.scaffold1317_size8987.2, evm.model.scaffold1317_size8987.3, evm.model.scaffold14_size1455245.276, evm.model.scaffold15_size1429888.170, evm.model.scaffold164_size528297.106, evm.model.scaffold164_size528297.107, evm.model.scaffold167_size520804.5, evm.model.scaffold169_size51…
GO:1990904	CC	p	9.31e-04	127	5.52712	2	20/2113	532/27751	ribonucleoprotein complex	3.53e-04	20	evm.model.scaffold105_size659173.32, evm.model.scaffold114_size641222.149, evm.model.scaffold121_size616638.140, evm.model.scaffold1317_size8987.2, evm.model.scaffold1317_size8987.3, evm.model.scaffold14_size1455245.276, evm.model.scaffold15_size1429888.170, evm.model.scaffold164_size528297.106, evm.model.scaffold164_size528297.107, evm.model.scaffold167_size520804.5, evm.model.scaffold169_size51…
GO:0005829	CC	p	9.31e-04	87	3.86496	4	167/2113	2804/27751	cytosol	3.57e-04	167	evm.model.scaffold1002_size25184.4, evm.model.scaffold1002_size25184.5, evm.model.scaffold102_size677817.126, evm.model.scaffold1040_size21852.7, evm.model.scaffold1040_size21852.8, evm.model.scaffold106_size656854.39, evm.model.scaffold106_size656854.40, evm.model.scaffold106_size656854.41, evm.model.scaffold108_size655003.30, evm.model.scaffold108_size655003.31, evm.model.scaffold111_size649699…
GO:0005840	CC	p	9.31e-04	19	5.52712	5	20/2113	532/27751	ribosome	3.53e-04	20	evm.model.scaffold105_size659173.32, evm.model.scaffold114_size641222.149, evm.model.scaffold121_size616638.140, evm.model.scaffold1317_size8987.2, evm.model.scaffold1317_size8987.3, evm.model.scaffold14_size1455245.276, evm.model.scaffold15_size1429888.170, evm.model.scaffold164_size528297.106, evm.model.scaffold164_size528297.107, evm.model.scaffold167_size520804.5, evm.model.scaffold169_size51…
GO:0016788	MF	p	1.25e-03	559	4.89172	3	46/2113	1003/27751	hydrolase activity, acting on ester bonds	1.25e-04	46	evm.model.scaffold109_size652032.89, evm.model.scaffold109_size652032.90, evm.model.scaffold10_size1516488.302, evm.model.scaffold111_size649699.26, evm.model.scaffold112_size645884.89, evm.model.scaffold126_size606685.1, evm.model.scaffold126_size606685.2, evm.model.scaffold133_size591675.121, evm.model.scaffold133_size591675.122, evm.model.scaffold148_size560834.127, evm.model.scaffold148_size5…
GO:0004518	MF	p	1.25e-03	107	4.89172	4	46/2113	1003/27751	nuclease activity	1.25e-04	46	evm.model.scaffold109_size652032.89, evm.model.scaffold109_size652032.90, evm.model.scaffold10_size1516488.302, evm.model.scaffold111_size649699.26, evm.model.scaffold112_size645884.89, evm.model.scaffold126_size606685.1, evm.model.scaffold126_size606685.2, evm.model.scaffold133_size591675.121, evm.model.scaffold133_size591675.122, evm.model.scaffold148_size560834.127, evm.model.scaffold148_size5…
GO:0090304	BP	p	1.79e-03	1714	5.61567	5	52/2113	1080/27751	nucleic acid metabolic process	2.19e-04	52	evm.model.scaffold106_size656854.45, evm.model.scaffold106_size656854.46, evm.model.scaffold1084_size18896.2, evm.model.scaffold1096_size17718.2, evm.model.scaffold1096_size17718.3, evm.model.scaffold115_size639320.178, evm.model.scaffold115_size639320.179, evm.model.scaffold121_size616638.3, evm.model.scaffold131_size602077.70, evm.model.scaffold159_size538032.98, evm.model.scaffold166_size52145…
GO:0006259	BP	p	1.79e-03	519	5.61567	6	52/2113	1080/27751	DNA metabolic process	2.19e-04	52	evm.model.scaffold106_size656854.45, evm.model.scaffold106_size656854.46, evm.model.scaffold1084_size18896.2, evm.model.scaffold1096_size17718.2, evm.model.scaffold1096_size17718.3, evm.model.scaffold115_size639320.178, evm.model.scaffold115_size639320.179, evm.model.scaffold121_size616638.3, evm.model.scaffold131_size602077.70, evm.model.scaffold159_size538032.98, evm.model.scaffold166_size52145…
GO:0097159	MF	p	2.08e-03	493	2.64616	2	646/2113	9474/27751	organic cyclic compound binding	3.12e-04	646	evm.model.scaffold100_size686073.46, evm.model.scaffold100_size686073.47, evm.model.scaffold101_size679088.14, evm.model.scaffold101_size679088.18, evm.model.scaffold102_size677817.126, evm.model.scaffold102_size677817.127, evm.model.scaffold1030_size23415.2, evm.model.scaffold1030_size23415.3, evm.model.scaffold1034_size22948.1, evm.model.scaffold1034_size22948.2, evm.model.scaffold1037_size2260…
GO:1901363	MF	p	2.08e-03	452	2.64616	2	646/2113	9474/27751	heterocyclic compound binding	3.12e-04	646	evm.model.scaffold100_size686073.46, evm.model.scaffold100_size686073.47, evm.model.scaffold101_size679088.14, evm.model.scaffold101_size679088.18, evm.model.scaffold102_size677817.126, evm.model.scaffold102_size677817.127, evm.model.scaffold1030_size23415.2, evm.model.scaffold1030_size23415.3, evm.model.scaffold1034_size22948.1, evm.model.scaffold1034_size22948.2, evm.model.scaffold1037_size2260…
GO:0005618	CC	e	3.32e-03	45	5.45463	3	65/2113	572/27751	cell wall	1.36e-03	65	evm.model.scaffold102_size677817.126, evm.model.scaffold102_size677817.162, evm.model.scaffold111_size649699.64, evm.model.scaffold111_size649699.65, evm.model.scaffold1147_size15341.2, evm.model.scaffold1147_size15341.3, evm.model.scaffold1152_size15161.2, evm.model.scaffold1152_size15161.3, evm.model.scaffold116_size639307.41, evm.model.scaffold116_size639307.42, evm.model.scaffold116_size63930…
GO:0003824	MF	e	3.90e-03	7519	2.24925	1	1148/2113	14090/27751	catalytic activity	6.83e-04	1148	evm.model.scaffold1002_size25184.4, evm.model.scaffold1002_size25184.5, evm.model.scaffold1009_size24788.10, evm.model.scaffold101_size679088.110, evm.model.scaffold101_size679088.111, evm.model.scaffold101_size679088.18, evm.model.scaffold1020_size23896.2, evm.model.scaffold1020_size23896.3, evm.model.scaffold102_size677817.126, evm.model.scaffold102_size677817.162, evm.model.scaffold102_size677…
GO:0044422	CC	p	4.01e-03	1634	4.27651	1	108/2113	1858/27751	organelle part	2.05e-03	108	evm.model.scaffold100_size686073.43, evm.model.scaffold100_size686073.45, evm.model.scaffold102_size677817.116, evm.model.scaffold102_size677817.117, evm.model.scaffold1040_size21852.7, evm.model.scaffold1040_size21852.8, evm.model.scaffold105_size659173.32, evm.model.scaffold106_size656854.45, evm.model.scaffold106_size656854.46, evm.model.scaffold111_size649699.60, evm.model.scaffold112_size645…
GO:0044446	CC	p	4.01e-03	1473	4.27651	3	108/2113	1858/27751	intracellular organelle part	2.05e-03	108	evm.model.scaffold100_size686073.43, evm.model.scaffold100_size686073.45, evm.model.scaffold102_size677817.116, evm.model.scaffold102_size677817.117, evm.model.scaffold1040_size21852.7, evm.model.scaffold1040_size21852.8, evm.model.scaffold105_size659173.32, evm.model.scaffold106_size656854.45, evm.model.scaffold106_size656854.46, evm.model.scaffold111_size649699.60, evm.model.scaffold112_size645…
GO:0044428	CC	p	4.01e-03	496	4.27651	4	108/2113	1858/27751	nuclear part	2.05e-03	108	evm.model.scaffold100_size686073.43, evm.model.scaffold100_size686073.45, evm.model.scaffold102_size677817.116, evm.model.scaffold102_size677817.117, evm.model.scaffold1040_size21852.7, evm.model.scaffold1040_size21852.8, evm.model.scaffold105_size659173.32, evm.model.scaffold106_size656854.45, evm.model.scaffold106_size656854.46, evm.model.scaffold111_size649699.60, evm.model.scaffold112_size645…
GO:0003674	MF	e	1.03e-02	11075	1.72865	0	1853/2113	23714/27751	molecular_function	2.06e-03	1853	evm.model.scaffold1002_size25184.4, evm.model.scaffold1002_size25184.5, evm.model.scaffold1009_size24788.10, evm.model.scaffold100_size686073.46, evm.model.scaffold100_size686073.47, evm.model.scaffold1011_size24759.6, evm.model.scaffold1019_size23903.4, evm.model.scaffold1019_size23903.7, evm.model.scaffold101_size679088.110, evm.model.scaffold101_size679088.111, evm.model.scaffold101_size679088…
GO:0050896	BP	e	1.30e-02	5954	3.6804	1	631/2113	7480/27751	response to stimulus	1.86e-03	631	evm.model.scaffold100_size686073.43, evm.model.scaffold100_size686073.45, evm.model.scaffold100_size686073.46, evm.model.scaffold100_size686073.47, evm.model.scaffold1019_size23903.4, evm.model.scaffold1019_size23903.7, evm.model.scaffold102_size677817.111, evm.model.scaffold102_size677817.112, evm.model.scaffold102_size677817.126, evm.model.scaffold102_size677817.162, evm.model.scaffold102_size6…
GO:0007049	BP	p	1.90e-02	937	5.60737	2	58/2113	1089/27751	cell cycle	2.90e-03	58	evm.model.scaffold102_size677817.126, evm.model.scaffold133_size591675.126, evm.model.scaffold133_size591675.127, evm.model.scaffold152_size557608.64, evm.model.scaffold152_size557608.65, evm.model.scaffold159_size538032.98, evm.model.scaffold166_size521459.6, evm.model.scaffold167_size520804.88, evm.model.scaffold167_size520804.89, evm.model.scaffold169_size519396.64, evm.model.scaffold172_size5…
GO:0009838	BP	e	2.03e-02	18	8.68837	2	10/2113	50/27751	abscission	3.94e-03	10	evm.model.scaffold116_size639307.41, evm.model.scaffold116_size639307.42, evm.model.scaffold116_size639307.47, evm.model.scaffold116_size639307.48, evm.model.scaffold161_size531985.17, evm.model.scaffold266_size374472.32, evm.model.scaffold5_size1651677.257, evm.model.scaffold5_size1651677.258, evm.model.scaffold5_size1651677.259, evm.model.scaffold5_size1651677.260
GO:0006950	BP	e	2.03e-02	1602	4.18745	2	391/2113	4505/27751	response to stress	3.90e-03	391	evm.model.scaffold100_size686073.46, evm.model.scaffold100_size686073.47, evm.model.scaffold102_size677817.162, evm.model.scaffold1035_size22867.6, evm.model.scaffold104_size664890.101, evm.model.scaffold105_size659173.33, evm.model.scaffold105_size659173.88, evm.model.scaffold106_size656854.39, evm.model.scaffold106_size656854.40, evm.model.scaffold106_size656854.41, evm.model.scaffold106_size65…
GO:0009607	BP	e	2.03e-02	859	5.27854	2	145/2113	1513/27751	response to biotic stimulus	3.81e-03	145	evm.model.scaffold100_size686073.46, evm.model.scaffold105_size659173.88, evm.model.scaffold106_size656854.39, evm.model.scaffold106_size656854.40, evm.model.scaffold106_size656854.41, evm.model.scaffold111_size649699.64, evm.model.scaffold111_size649699.65, evm.model.scaffold1147_size15341.2, evm.model.scaffold1147_size15341.3, evm.model.scaffold1167_size14652.1, evm.model.scaffold1167_size14652…
GO:0009628	BP	e	2.03e-02	393	4.52077	2	288/2113	3228/27751	response to abiotic stimulus	3.38e-03	288	evm.model.scaffold100_size686073.47, evm.model.scaffold102_size677817.111, evm.model.scaffold102_size677817.112, evm.model.scaffold102_size677817.162, evm.model.scaffold104_size664890.101, evm.model.scaffold105_size659173.33, evm.model.scaffold106_size656854.45, evm.model.scaffold106_size656854.46, evm.model.scaffold1096_size17718.2, evm.model.scaffold1096_size17718.3, evm.model.scaffold10_size15…
GO:0009507	CC	p	2.93e-02	49	3.7944	6	196/2113	3009/27751	chloroplast	1.62e-02	196	evm.model.scaffold100_size686073.43, evm.model.scaffold100_size686073.45, evm.model.scaffold102_size677817.126, evm.model.scaffold105_size659173.32, evm.model.scaffold10_size1516488.210, evm.model.scaffold111_size649699.60, evm.model.scaffold111_size649699.64, evm.model.scaffold111_size649699.65, evm.model.scaffold1152_size15161.2, evm.model.scaffold1152_size15161.3, evm.model.scaffold117_size639…
GO:0005622	CC	p	3.69e-02	2386	4.9452	2	54/2113	952/27751	intracellular	2.12e-02	54	evm.model.scaffold106_size656854.167, evm.model.scaffold106_size656854.168, evm.model.scaffold109_size652032.89, evm.model.scaffold109_size652032.90, evm.model.scaffold10_size1516488.192, evm.model.scaffold112_size645884.89, evm.model.scaffold118_size635519.88, evm.model.scaffold126_size606685.139, evm.model.scaffold1392_size7328.1, evm.model.scaffold1392_size7328.2, evm.model.scaffold140_size577…
GO:0009536	CC	p	3.72e-02	137	3.75147	5	207/2113	3141/27751	plastid	2.22e-02	207	evm.model.scaffold100_size686073.43, evm.model.scaffold100_size686073.45, evm.model.scaffold102_size677817.111, evm.model.scaffold102_size677817.112, evm.model.scaffold102_size677817.126, evm.model.scaffold105_size659173.32, evm.model.scaffold10_size1516488.210, evm.model.scaffold111_size649699.60, evm.model.scaffold111_size649699.64, evm.model.scaffold111_size649699.65, evm.model.scaffold112_siz…
GO:0005575	CC	p	3.74e-02	4212	1.92976	0	1432/2113	19419/27751	cellular_component	2.31e-02	1432	evm.model.scaffold1002_size25184.4, evm.model.scaffold1002_size25184.5, evm.model.scaffold1007_size24833.2, evm.model.scaffold100_size686073.43, evm.model.scaffold100_size686073.45, evm.model.scaffold1011_size24759.6, evm.model.scaffold1019_size23903.4, evm.model.scaffold1019_size23903.7, evm.model.scaffold101_size679088.14, evm.model.scaffold101_size679088.18, evm.model.scaffold1020_size23896.2,…
GO:0005515	MF	p	4.16e-02	969	2.98118	2	468/2113	6777/27751	protein binding	1.14e-02	468	evm.model.scaffold1009_size24788.10, evm.model.scaffold101_size679088.111, evm.model.scaffold102_size677817.116, evm.model.scaffold102_size677817.117, evm.model.scaffold102_size677817.36, evm.model.scaffold102_size677817.37, evm.model.scaffold102_size677817.38, evm.model.scaffold104_size664890.101, evm.model.scaffold105_size659173.93, evm.model.scaffold105_size659173.94, evm.model.scaffold106_siz…
GO:0005730	CC	p	4.72e-02	26	4.99583	5	52/2113	905/27751	nucleolus	3.01e-02	52	evm.model.scaffold100_size686073.43, evm.model.scaffold100_size686073.45, evm.model.scaffold105_size659173.32, evm.model.scaffold111_size649699.60, evm.model.scaffold112_size645884.51, evm.model.scaffold112_size645884.52, evm.model.scaffold125_size608205.27, evm.model.scaffold125_size608205.28, evm.model.scaffold147_size561064.71, evm.model.scaffold147_size561064.72, evm.model.scaffold14_size1455…

## Sheet: Ugibba TANDEM
go-basic.obo: fmt(1.2) rel(2019-06-10) 47,442 GO Terms; optional_attrs(relationship)
goslim_plant.obo: fmt(1.2) rel(None) 156 GO Terms
Sections: goatools.test_data.sections.data2018_07_find_enrichment
phosph
GO	NS	enrichment	p_fdr_bh	dcnt	tinfo	depth	ratio_in_study	ratio_in_pop	name	p_uncorrected	study_count	study_items
GO:0016772	MF	e	4.16e-02	601	4.10353	3	199/2113	2206/27751	transferase activity, transferring phosphorus-containing groups	1.07e-02	199	evm.model.scaffold1034_size22948.1, evm.model.scaffold1034_size22948.2, evm.model.scaffold1040_size21852.7, evm.model.scaffold1040_size21852.8, evm.model.scaffold105_size659173.88, evm.model.scaffold105_size659173.89, evm.model.scaffold106_size656854.39, evm.model.scaffold106_size656854.40, evm.model.scaffold106_size656854.41, evm.model.scaffold107_size656107.105, evm.model.scaffold107_size656107…
GO:0016301	MF	e	4.16e-02	352	4.10353	4	199/2113	2206/27751	kinase activity	1.07e-02	199	evm.model.scaffold1034_size22948.1, evm.model.scaffold1034_size22948.2, evm.model.scaffold1040_size21852.7, evm.model.scaffold1040_size21852.8, evm.model.scaffold105_size659173.88, evm.model.scaffold105_size659173.89, evm.model.scaffold106_size656854.39, evm.model.scaffold106_size656854.40, evm.model.scaffold106_size656854.41, evm.model.scaffold107_size656107.105, evm.model.scaffold107_size656107…
cellular_component
GO:0005739	CC	p	6.88e-05	95	5.38052	5	19/2113	616/27751	mitochondrion	4.93e-06	19	evm.model.scaffold1152_size15161.2, evm.model.scaffold1152_size15161.3, evm.model.scaffold121_size616638.140, evm.model.scaffold14_size1455245.276, evm.model.scaffold203_size463369.31, evm.model.scaffold203_size463369.34, evm.model.scaffold393_size271938.18, evm.model.scaffold39_size1053542.235, evm.model.scaffold423_size245578.28, evm.model.scaffold423_size245578.29, evm.model.scaffold43_size102…
GO:0000323	CC	e	4.65e-04	48	6.96748	6	23/2113	126/27751	lytic vacuole	1.19e-04	23	evm.model.scaffold153_size555728.96, evm.model.scaffold166_size521459.95, evm.model.scaffold189_size480584.94, evm.model.scaffold189_size480584.95, evm.model.scaffold208_size452143.28, evm.model.scaffold208_size452143.29, evm.model.scaffold208_size452143.30, evm.model.scaffold223_size435064.138, evm.model.scaffold251_size391187.63, evm.model.scaffold251_size391187.64, evm.model.scaffold286_size35…
Broad
GO	NS	enrichment	p_fdr_bh	dcnt	tinfo	depth	ratio_in_study	ratio_in_pop	name	p_uncorrected	study_count	study_items
GO:0044464	CC	p	6.88e-05	3335	2.17867	1	1009/2113	15140/27751	cell part	1.02e-05	1009	evm.model.scaffold1002_size25184.4, evm.model.scaffold1002_size25184.5, evm.model.scaffold100_size686073.43, evm.model.scaffold100_size686073.45, evm.model.scaffold1011_size24759.6, evm.model.scaffold1019_size23903.4, evm.model.scaffold1019_size23903.7, evm.model.scaffold101_size679088.14, evm.model.scaffold101_size679088.18, evm.model.scaffold102_size677817.111, evm.model.scaffold102_size677817.…
GO:0009987	BP	p	1.84e-04	18757	2.8421	1	1210/2113	17297/27751	cellular process	1.01e-05	1210	evm.model.scaffold1002_size25184.4, evm.model.scaffold1002_size25184.5, evm.model.scaffold100_size686073.43, evm.model.scaffold100_size686073.45, evm.model.scaffold100_size686073.46, evm.model.scaffold100_size686073.47, evm.model.scaffold1019_size23903.4, evm.model.scaffold1019_size23903.7, evm.model.scaffold101_size679088.110, evm.model.scaffold101_size679088.111, evm.model.scaffold101_size67908…
GO:0044237	BP	p	1.84e-04	8670	3.33037	2	702/2113	10615/27751	cellular metabolic process	9.57e-06	702	evm.model.scaffold1002_size25184.4, evm.model.scaffold1002_size25184.5, evm.model.scaffold100_size686073.43, evm.model.scaffold100_size686073.45, evm.model.scaffold100_size686073.46, evm.model.scaffold100_size686073.47, evm.model.scaffold102_size677817.126, evm.model.scaffold102_size677817.33, evm.model.scaffold102_size677817.36, evm.model.scaffold102_size677817.37, evm.model.scaffold1030_size234…
GO:1901360	BP	p	1.84e-04	3874	3.85383	3	398/2113	6289/27751	organic cyclic compound metabolic process	1.69e-05	398	evm.model.scaffold100_size686073.43, evm.model.scaffold100_size686073.45, evm.model.scaffold100_size686073.46, evm.model.scaffold100_size686073.47, evm.model.scaffold102_size677817.126, evm.model.scaffold102_size677817.33, evm.model.scaffold1030_size23415.2, evm.model.scaffold1030_size23415.3, evm.model.scaffold1040_size21852.7, evm.model.scaffold1040_size21852.8, evm.model.scaffold104_size664890…
GO:0034641	BP	p	1.84e-04	3512	3.76169	3	434/2113	6896/27751	cellular nitrogen compound metabolic process	9.46e-06	434	evm.model.scaffold100_size686073.43, evm.model.scaffold100_size686073.45, evm.model.scaffold100_size686073.46, evm.model.scaffold100_size686073.47, evm.model.scaffold102_size677817.126, evm.model.scaffold102_size677817.33, evm.model.scaffold1030_size23415.2, evm.model.scaffold1030_size23415.3, evm.model.scaffold1040_size21852.7, evm.model.scaffold1040_size21852.8, evm.model.scaffold104_size664890…
GO:0006725	BP	p	1.84e-04	3345	3.85383	3	398/2113	6289/27751	cellular aromatic compound metabolic process	1.69e-05	398	evm.model.scaffold100_size686073.43, evm.model.scaffold100_size686073.45, evm.model.scaffold100_size686073.46, evm.model.scaffold100_size686073.47, evm.model.scaffold102_size677817.126, evm.model.scaffold102_size677817.33, evm.model.scaffold1030_size23415.2, evm.model.scaffold1030_size23415.3, evm.model.scaffold1040_size21852.7, evm.model.scaffold1040_size21852.8, evm.model.scaffold104_size664890…
GO:0046483	BP	p	1.84e-04	3260	3.85383	3	398/2113	6289/27751	heterocycle metabolic process	1.69e-05	398	evm.model.scaffold100_size686073.43, evm.model.scaffold100_size686073.45, evm.model.scaffold100_size686073.46, evm.model.scaffold100_size686073.47, evm.model.scaffold102_size677817.126, evm.model.scaffold102_size677817.33, evm.model.scaffold1030_size23415.2, evm.model.scaffold1030_size23415.3, evm.model.scaffold1040_size21852.7, evm.model.scaffold1040_size21852.8, evm.model.scaffold104_size664890…
GO:0019748	BP	e	1.84e-04	578	6.28322	2	104/2113	554/27751	secondary metabolic process	2.17e-06	104	evm.model.scaffold100_size686073.47, evm.model.scaffold106_size656854.167, evm.model.scaffold106_size656854.168, evm.model.scaffold110_size649966.86, evm.model.scaffold110_size649966.87, evm.model.scaffold111_size649699.32, evm.model.scaffold111_size649699.64, evm.model.scaffold111_size649699.65, evm.model.scaffold121_size616638.11, evm.model.scaffold121_size616638.81, evm.model.scaffold121_size6…
GO:0030312	CC	e	3.32e-03	88	5.44766	2	65/2113	576/27751	external encapsulating structure	1.43e-03	65	evm.model.scaffold102_size677817.126, evm.model.scaffold102_size677817.162, evm.model.scaffold111_size649699.64, evm.model.scaffold111_size649699.65, evm.model.scaffold1147_size15341.2, evm.model.scaffold1147_size15341.3, evm.model.scaffold1152_size15161.2, evm.model.scaffold1152_size15161.3, evm.model.scaffold116_size639307.41, evm.model.scaffold116_size639307.42, evm.model.scaffold116_size63930…
GO:0016020	CC	e	3.32e-03	1048	2.41612	1	979/2113	11940/27751	membrane	1.48e-03	979	evm.model.scaffold1007_size24833.2, evm.model.scaffold100_size686073.45, evm.model.scaffold1011_size24759.6, evm.model.scaffold1019_size23903.4, evm.model.scaffold1019_size23903.7, evm.model.scaffold101_size679088.18, evm.model.scaffold1020_size23896.2, evm.model.scaffold1020_size23896.3, evm.model.scaffold102_size677817.111, evm.model.scaffold102_size677817.112, evm.model.scaffold102_size677817.…
GO:0006807	BP	p	3.36e-03	6139	3.28317	2	771/2113	11128/27751	nitrogen compound metabolic process	4.46e-04	771	evm.model.scaffold1002_size25184.4, evm.model.scaffold1002_size25184.5, evm.model.scaffold100_size686073.43, evm.model.scaffold100_size686073.45, evm.model.scaffold100_size686073.46, evm.model.scaffold100_size686073.47, evm.model.scaffold102_size677817.126, evm.model.scaffold102_size677817.33, evm.model.scaffold102_size677817.36, evm.model.scaffold102_size677817.37, evm.model.scaffold1030_size234…
GO:0005886	CC	e	2.87e-02	473	3.55054	2	330/2113	3840/27751	plasma membrane	1.53e-02	330	evm.model.scaffold1011_size24759.6, evm.model.scaffold1019_size23903.4, evm.model.scaffold1019_size23903.7, evm.model.scaffold102_size677817.126, evm.model.scaffold105_size659173.32, evm.model.scaffold105_size659173.88, evm.model.scaffold105_size659173.89, evm.model.scaffold106_size656854.39, evm.model.scaffold106_size656854.40, evm.model.scaffold106_size656854.41, evm.model.scaffold107_size65610…
Misc.
GO	NS	enrichment	p_fdr_bh	dcnt	tinfo	depth	ratio_in_study	ratio_in_pop	name	p_uncorrected	study_count	study_items
GO:0044424	CC	p	6.88e-05	2384	2.41319	2	734/2113	11975/27751	intracellular part	9.22e-06	734	evm.model.scaffold1002_size25184.4, evm.model.scaffold1002_size25184.5, evm.model.scaffold100_size686073.43, evm.model.scaffold100_size686073.45, evm.model.scaffold1011_size24759.6, evm.model.scaffold1019_size23903.4, evm.model.scaffold1019_size23903.7, evm.model.scaffold101_size679088.14, evm.model.scaffold101_size679088.18, evm.model.scaffold102_size677817.111, evm.model.scaffold102_size677817.…
GO:0043226	CC	p	6.88e-05	1957	2.85726	1	483/2113	7681/27751	organelle	9.43e-06	483	evm.model.scaffold100_size686073.43, evm.model.scaffold100_size686073.45, evm.model.scaffold1011_size24759.6, evm.model.scaffold102_size677817.111, evm.model.scaffold102_size677817.112, evm.model.scaffold102_size677817.116, evm.model.scaffold102_size677817.117, evm.model.scaffold102_size677817.126, evm.model.scaffold102_size677817.127, evm.model.scaffold102_size677817.33, evm.model.scaffold1035_s…
GO:0043229	CC	p	6.88e-05	1784	2.85726	3	483/2113	7681/27751	intracellular organelle	9.43e-06	483	evm.model.scaffold100_size686073.43, evm.model.scaffold100_size686073.45, evm.model.scaffold1011_size24759.6, evm.model.scaffold102_size677817.111, evm.model.scaffold102_size677817.112, evm.model.scaffold102_size677817.116, evm.model.scaffold102_size677817.117, evm.model.scaffold102_size677817.126, evm.model.scaffold102_size677817.127, evm.model.scaffold102_size677817.33, evm.model.scaffold1035_s…
GO:0044444	CC	p	6.88e-05	1270	2.81133	3	502/2113	8042/27751	cytoplasmic part	8.85e-06	502	evm.model.scaffold1002_size25184.4, evm.model.scaffold1002_size25184.5, evm.model.scaffold100_size686073.43, evm.model.scaffold100_size686073.45, evm.model.scaffold1011_size24759.6, evm.model.scaffold102_size677817.111, evm.model.scaffold102_size677817.112, evm.model.scaffold102_size677817.116, evm.model.scaffold102_size677817.117, evm.model.scaffold102_size677817.126, evm.model.scaffold102_size6…
GO:0005576	CC	e	6.88e-05	181	5.5461	1	82/2113	522/27751	extracellular region	2.36e-06	82	evm.model.scaffold113_size644116.7, evm.model.scaffold113_size644116.8, evm.model.scaffold116_size639307.41, evm.model.scaffold116_size639307.42, evm.model.scaffold116_size639307.47, evm.model.scaffold116_size639307.48, evm.model.scaffold121_size616638.63, evm.model.scaffold121_size616638.64, evm.model.scaffold125_size608205.20, evm.model.scaffold125_size608205.21, evm.model.scaffold128_size60635…
GO:0005634	CC	p	9.91e-05	517	5.43729	5	19/2113	582/27751	nucleus	1.69e-05	19	evm.model.scaffold102_size677817.126, evm.model.scaffold113_size644116.75, evm.model.scaffold113_size644116.77, evm.model.scaffold121_size616638.3, evm.model.scaffold152_size557608.66, evm.model.scaffold161_size531985.123, evm.model.scaffold172_size512938.108, evm.model.scaffold172_size512938.109, evm.model.scaffold17_size1411551.110, evm.model.scaffold17_size1411551.111, evm.model.scaffold406_si…
GO:0043227	CC	p	1.57e-04	1367	3.06199	2	399/2113	6259/27751	membrane-bounded organelle	3.00e-05	399	evm.model.scaffold100_size686073.43, evm.model.scaffold100_size686073.45, evm.model.scaffold1011_size24759.6, evm.model.scaffold102_size677817.111, evm.model.scaffold102_size677817.112, evm.model.scaffold102_size677817.116, evm.model.scaffold102_size677817.117, evm.model.scaffold102_size677817.126, evm.model.scaffold102_size677817.33, evm.model.scaffold1035_size22867.6, evm.model.scaffold105_size…
GO:0003676	MF	p	1.69e-04	328	3.08348	3	368/2113	6118/27751	nucleic acid binding	8.44e-06	368	evm.model.scaffold100_size686073.46, evm.model.scaffold100_size686073.47, evm.model.scaffold101_size679088.14, evm.model.scaffold101_size679088.18, evm.model.scaffold102_size677817.126, evm.model.scaffold1030_size23415.2, evm.model.scaffold1030_size23415.3, evm.model.scaffold1037_size22605.3, evm.model.scaffold1037_size22605.4, evm.model.scaffold104_size664890.101, evm.model.scaffold105_size65917…
GO:0003723	MF	p	1.69e-04	171	4.00231	4	117/2113	2441/27751	RNA binding	6.03e-06	117	evm.model.scaffold101_size679088.14, evm.model.scaffold101_size679088.18, evm.model.scaffold102_size677817.126, evm.model.scaffold105_size659173.30, evm.model.scaffold105_size659173.31, evm.model.scaffold105_size659173.32, evm.model.scaffold109_size652032.89, evm.model.scaffold109_size652032.90, evm.model.scaffold111_size649699.26, evm.model.scaffold111_size649699.60, evm.model.scaffold112_size64…
GO:0042221	BP	e	1.84e-04	2467	4.1705	2	424/2113	4582/27751	response to chemical	1.47e-05	424	evm.model.scaffold100_size686073.43, evm.model.scaffold100_size686073.45, evm.model.scaffold100_size686073.46, evm.model.scaffold100_size686073.47, evm.model.scaffold1019_size23903.4, evm.model.scaffold1019_size23903.7, evm.model.scaffold102_size677817.126, evm.model.scaffold102_size677817.162, evm.model.scaffold102_size677817.36, evm.model.scaffold102_size677817.37, evm.model.scaffold104_size664…
GO:0006139	BP	p	1.84e-04	2463	3.85383	4	398/2113	6289/27751	nucleobase-containing compound metabolic process	1.69e-05	398	evm.model.scaffold100_size686073.43, evm.model.scaffold100_size686073.45, evm.model.scaffold100_size686073.46, evm.model.scaffold100_size686073.47, evm.model.scaffold102_size677817.126, evm.model.scaffold102_size677817.33, evm.model.scaffold1030_size23415.2, evm.model.scaffold1030_size23415.3, evm.model.scaffold1040_size21852.7, evm.model.scaffold1040_size21852.8, evm.model.scaffold104_size664890…
GO:0043231	CC	p	4.41e-04	1050	3.08445	4	395/2113	6120/27751	intracellular membrane-bounded organelle	9.38e-05	395	evm.model.scaffold100_size686073.43, evm.model.scaffold100_size686073.45, evm.model.scaffold102_size677817.111, evm.model.scaffold102_size677817.112, evm.model.scaffold102_size677817.116, evm.model.scaffold102_size677817.117, evm.model.scaffold102_size677817.126, evm.model.scaffold102_size677817.33, evm.model.scaffold1035_size22867.6, evm.model.scaffold105_size659173.32, evm.model.scaffold105_siz…
GO:0005764	CC	e	4.65e-04	35	6.96748	7	23/2113	126/27751	lysosome	1.19e-04	23	evm.model.scaffold153_size555728.96, evm.model.scaffold166_size521459.95, evm.model.scaffold189_size480584.94, evm.model.scaffold189_size480584.95, evm.model.scaffold208_size452143.28, evm.model.scaffold208_size452143.29, evm.model.scaffold208_size452143.30, evm.model.scaffold223_size435064.138, evm.model.scaffold251_size391187.63, evm.model.scaffold251_size391187.64, evm.model.scaffold286_size35…
GO:0009719	BP	e	6.06e-04	564	4.71544	2	256/2113	2657/27751	response to endogenous stimulus	6.18e-05	256	evm.model.scaffold1019_size23903.4, evm.model.scaffold1019_size23903.7, evm.model.scaffold102_size677817.162, evm.model.scaffold102_size677817.36, evm.model.scaffold102_size677817.37, evm.model.scaffold105_size659173.49, evm.model.scaffold1096_size17718.2, evm.model.scaffold1096_size17718.3, evm.model.scaffold1109_size16905.3, evm.model.scaffold1109_size16905.4, evm.model.scaffold1147_size15341.2…
GO:0043228	CC	p	7.91e-04	629	4.25205	2	105/2113	1904/27751	non-membrane-bounded organelle	2.35e-04	105	evm.model.scaffold100_size686073.43, evm.model.scaffold100_size686073.45, evm.model.scaffold102_size677817.126, evm.model.scaffold102_size677817.127, evm.model.scaffold105_size659173.32, evm.model.scaffold107_size656107.75, evm.model.scaffold107_size656107.76, evm.model.scaffold111_size649699.60, evm.model.scaffold112_size645884.51, evm.model.scaffold112_size645884.52, evm.model.scaffold114_size6…
GO:0043232	CC	p	7.91e-04	601	4.25205	4	105/2113	1904/27751	intracellular non-membrane-bounded organelle	2.35e-04	105	evm.model.scaffold100_size686073.43, evm.model.scaffold100_size686073.45, evm.model.scaffold102_size677817.126, evm.model.scaffold102_size677817.127, evm.model.scaffold105_size659173.32, evm.model.scaffold107_size656107.75, evm.model.scaffold107_size656107.76, evm.model.scaffold111_size649699.60, evm.model.scaffold112_size645884.51, evm.model.scaffold112_size645884.52, evm.model.scaffold114_size6…
GO:0032991	CC	p	9.31e-04	2121	5.52712	1	20/2113	532/27751	protein-containing complex	3.53e-04	20	evm.model.scaffold105_size659173.32, evm.model.scaffold114_size641222.149, evm.model.scaffold121_size616638.140, evm.model.scaffold1317_size8987.2, evm.model.scaffold1317_size8987.3, evm.model.scaffold14_size1455245.276, evm.model.scaffold15_size1429888.170, evm.model.scaffold164_size528297.106, evm.model.scaffold164_size528297.107, evm.model.scaffold167_size520804.5, evm.model.scaffold169_size51…
GO:1990904	CC	p	9.31e-04	127	5.52712	2	20/2113	532/27751	ribonucleoprotein complex	3.53e-04	20	evm.model.scaffold105_size659173.32, evm.model.scaffold114_size641222.149, evm.model.scaffold121_size616638.140, evm.model.scaffold1317_size8987.2, evm.model.scaffold1317_size8987.3, evm.model.scaffold14_size1455245.276, evm.model.scaffold15_size1429888.170, evm.model.scaffold164_size528297.106, evm.model.scaffold164_size528297.107, evm.model.scaffold167_size520804.5, evm.model.scaffold169_size51…
GO:0005829	CC	p	9.31e-04	87	3.86496	4	167/2113	2804/27751	cytosol	3.57e-04	167	evm.model.scaffold1002_size25184.4, evm.model.scaffold1002_size25184.5, evm.model.scaffold102_size677817.126, evm.model.scaffold1040_size21852.7, evm.model.scaffold1040_size21852.8, evm.model.scaffold106_size656854.39, evm.model.scaffold106_size656854.40, evm.model.scaffold106_size656854.41, evm.model.scaffold108_size655003.30, evm.model.scaffold108_size655003.31, evm.model.scaffold111_size649699…
GO:0005840	CC	p	9.31e-04	19	5.52712	5	20/2113	532/27751	ribosome	3.53e-04	20	evm.model.scaffold105_size659173.32, evm.model.scaffold114_size641222.149, evm.model.scaffold121_size616638.140, evm.model.scaffold1317_size8987.2, evm.model.scaffold1317_size8987.3, evm.model.scaffold14_size1455245.276, evm.model.scaffold15_size1429888.170, evm.model.scaffold164_size528297.106, evm.model.scaffold164_size528297.107, evm.model.scaffold167_size520804.5, evm.model.scaffold169_size51…
GO:0016788	MF	p	1.25e-03	559	4.89172	3	46/2113	1003/27751	hydrolase activity, acting on ester bonds	1.25e-04	46	evm.model.scaffold109_size652032.89, evm.model.scaffold109_size652032.90, evm.model.scaffold10_size1516488.302, evm.model.scaffold111_size649699.26, evm.model.scaffold112_size645884.89, evm.model.scaffold126_size606685.1, evm.model.scaffold126_size606685.2, evm.model.scaffold133_size591675.121, evm.model.scaffold133_size591675.122, evm.model.scaffold148_size560834.127, evm.model.scaffold148_size5…
GO:0004518	MF	p	1.25e-03	107	4.89172	4	46/2113	1003/27751	nuclease activity	1.25e-04	46	evm.model.scaffold109_size652032.89, evm.model.scaffold109_size652032.90, evm.model.scaffold10_size1516488.302, evm.model.scaffold111_size649699.26, evm.model.scaffold112_size645884.89, evm.model.scaffold126_size606685.1, evm.model.scaffold126_size606685.2, evm.model.scaffold133_size591675.121, evm.model.scaffold133_size591675.122, evm.model.scaffold148_size560834.127, evm.model.scaffold148_size5…
GO:0090304	BP	p	1.79e-03	1714	5.61567	5	52/2113	1080/27751	nucleic acid metabolic process	2.19e-04	52	evm.model.scaffold106_size656854.45, evm.model.scaffold106_size656854.46, evm.model.scaffold1084_size18896.2, evm.model.scaffold1096_size17718.2, evm.model.scaffold1096_size17718.3, evm.model.scaffold115_size639320.178, evm.model.scaffold115_size639320.179, evm.model.scaffold121_size616638.3, evm.model.scaffold131_size602077.70, evm.model.scaffold159_size538032.98, evm.model.scaffold166_size52145…
GO:0006259	BP	p	1.79e-03	519	5.61567	6	52/2113	1080/27751	DNA metabolic process	2.19e-04	52	evm.model.scaffold106_size656854.45, evm.model.scaffold106_size656854.46, evm.model.scaffold1084_size18896.2, evm.model.scaffold1096_size17718.2, evm.model.scaffold1096_size17718.3, evm.model.scaffold115_size639320.178, evm.model.scaffold115_size639320.179, evm.model.scaffold121_size616638.3, evm.model.scaffold131_size602077.70, evm.model.scaffold159_size538032.98, evm.model.scaffold166_size52145…
GO:0097159	MF	p	2.08e-03	493	2.64616	2	646/2113	9474/27751	organic cyclic compound binding	3.12e-04	646	evm.model.scaffold100_size686073.46, evm.model.scaffold100_size686073.47, evm.model.scaffold101_size679088.14, evm.model.scaffold101_size679088.18, evm.model.scaffold102_size677817.126, evm.model.scaffold102_size677817.127, evm.model.scaffold1030_size23415.2, evm.model.scaffold1030_size23415.3, evm.model.scaffold1034_size22948.1, evm.model.scaffold1034_size22948.2, evm.model.scaffold1037_size2260…
GO:1901363	MF	p	2.08e-03	452	2.64616	2	646/2113	9474/27751	heterocyclic compound binding	3.12e-04	646	evm.model.scaffold100_size686073.46, evm.model.scaffold100_size686073.47, evm.model.scaffold101_size679088.14, evm.model.scaffold101_size679088.18, evm.model.scaffold102_size677817.126, evm.model.scaffold102_size677817.127, evm.model.scaffold1030_size23415.2, evm.model.scaffold1030_size23415.3, evm.model.scaffold1034_size22948.1, evm.model.scaffold1034_size22948.2, evm.model.scaffold1037_size2260…
GO:0005618	CC	e	3.32e-03	45	5.45463	3	65/2113	572/27751	cell wall	1.36e-03	65	evm.model.scaffold102_size677817.126, evm.model.scaffold102_size677817.162, evm.model.scaffold111_size649699.64, evm.model.scaffold111_size649699.65, evm.model.scaffold1147_size15341.2, evm.model.scaffold1147_size15341.3, evm.model.scaffold1152_size15161.2, evm.model.scaffold1152_size15161.3, evm.model.scaffold116_size639307.41, evm.model.scaffold116_size639307.42, evm.model.scaffold116_size63930…
GO:0003824	MF	e	3.90e-03	7519	2.24925	1	1148/2113	14090/27751	catalytic activity	6.83e-04	1148	evm.model.scaffold1002_size25184.4, evm.model.scaffold1002_size25184.5, evm.model.scaffold1009_size24788.10, evm.model.scaffold101_size679088.110, evm.model.scaffold101_size679088.111, evm.model.scaffold101_size679088.18, evm.model.scaffold1020_size23896.2, evm.model.scaffold1020_size23896.3, evm.model.scaffold102_size677817.126, evm.model.scaffold102_size677817.162, evm.model.scaffold102_size677…
GO:0044422	CC	p	4.01e-03	1634	4.27651	1	108/2113	1858/27751	organelle part	2.05e-03	108	evm.model.scaffold100_size686073.43, evm.model.scaffold100_size686073.45, evm.model.scaffold102_size677817.116, evm.model.scaffold102_size677817.117, evm.model.scaffold1040_size21852.7, evm.model.scaffold1040_size21852.8, evm.model.scaffold105_size659173.32, evm.model.scaffold106_size656854.45, evm.model.scaffold106_size656854.46, evm.model.scaffold111_size649699.60, evm.model.scaffold112_size645…
GO:0044446	CC	p	4.01e-03	1473	4.27651	3	108/2113	1858/27751	intracellular organelle part	2.05e-03	108	evm.model.scaffold100_size686073.43, evm.model.scaffold100_size686073.45, evm.model.scaffold102_size677817.116, evm.model.scaffold102_size677817.117, evm.model.scaffold1040_size21852.7, evm.model.scaffold1040_size21852.8, evm.model.scaffold105_size659173.32, evm.model.scaffold106_size656854.45, evm.model.scaffold106_size656854.46, evm.model.scaffold111_size649699.60, evm.model.scaffold112_size645…
GO:0044428	CC	p	4.01e-03	496	4.27651	4	108/2113	1858/27751	nuclear part	2.05e-03	108	evm.model.scaffold100_size686073.43, evm.model.scaffold100_size686073.45, evm.model.scaffold102_size677817.116, evm.model.scaffold102_size677817.117, evm.model.scaffold1040_size21852.7, evm.model.scaffold1040_size21852.8, evm.model.scaffold105_size659173.32, evm.model.scaffold106_size656854.45, evm.model.scaffold106_size656854.46, evm.model.scaffold111_size649699.60, evm.model.scaffold112_size645…
GO:0003674	MF	e	1.03e-02	11075	1.72865	0	1853/2113	23714/27751	molecular_function	2.06e-03	1853	evm.model.scaffold1002_size25184.4, evm.model.scaffold1002_size25184.5, evm.model.scaffold1009_size24788.10, evm.model.scaffold100_size686073.46, evm.model.scaffold100_size686073.47, evm.model.scaffold1011_size24759.6, evm.model.scaffold1019_size23903.4, evm.model.scaffold1019_size23903.7, evm.model.scaffold101_size679088.110, evm.model.scaffold101_size679088.111, evm.model.scaffold101_size679088…
GO:0050896	BP	e	1.30e-02	5954	3.6804	1	631/2113	7480/27751	response to stimulus	1.86e-03	631	evm.model.scaffold100_size686073.43, evm.model.scaffold100_size686073.45, evm.model.scaffold100_size686073.46, evm.model.scaffold100_size686073.47, evm.model.scaffold1019_size23903.4, evm.model.scaffold1019_size23903.7, evm.model.scaffold102_size677817.111, evm.model.scaffold102_size677817.112, evm.model.scaffold102_size677817.126, evm.model.scaffold102_size677817.162, evm.model.scaffold102_size6…
GO:0007049	BP	p	1.90e-02	937	5.60737	2	58/2113	1089/27751	cell cycle	2.90e-03	58	evm.model.scaffold102_size677817.126, evm.model.scaffold133_size591675.126, evm.model.scaffold133_size591675.127, evm.model.scaffold152_size557608.64, evm.model.scaffold152_size557608.65, evm.model.scaffold159_size538032.98, evm.model.scaffold166_size521459.6, evm.model.scaffold167_size520804.88, evm.model.scaffold167_size520804.89, evm.model.scaffold169_size519396.64, evm.model.scaffold172_size5…
GO:0009838	BP	e	2.03e-02	18	8.68837	2	10/2113	50/27751	abscission	3.94e-03	10	evm.model.scaffold116_size639307.41, evm.model.scaffold116_size639307.42, evm.model.scaffold116_size639307.47, evm.model.scaffold116_size639307.48, evm.model.scaffold161_size531985.17, evm.model.scaffold266_size374472.32, evm.model.scaffold5_size1651677.257, evm.model.scaffold5_size1651677.258, evm.model.scaffold5_size1651677.259, evm.model.scaffold5_size1651677.260
GO:0006950	BP	e	2.03e-02	1602	4.18745	2	391/2113	4505/27751	response to stress	3.90e-03	391	evm.model.scaffold100_size686073.46, evm.model.scaffold100_size686073.47, evm.model.scaffold102_size677817.162, evm.model.scaffold1035_size22867.6, evm.model.scaffold104_size664890.101, evm.model.scaffold105_size659173.33, evm.model.scaffold105_size659173.88, evm.model.scaffold106_size656854.39, evm.model.scaffold106_size656854.40, evm.model.scaffold106_size656854.41, evm.model.scaffold106_size65…
GO:0009607	BP	e	2.03e-02	859	5.27854	2	145/2113	1513/27751	response to biotic stimulus	3.81e-03	145	evm.model.scaffold100_size686073.46, evm.model.scaffold105_size659173.88, evm.model.scaffold106_size656854.39, evm.model.scaffold106_size656854.40, evm.model.scaffold106_size656854.41, evm.model.scaffold111_size649699.64, evm.model.scaffold111_size649699.65, evm.model.scaffold1147_size15341.2, evm.model.scaffold1147_size15341.3, evm.model.scaffold1167_size14652.1, evm.model.scaffold1167_size14652…
GO:0009628	BP	e	2.03e-02	393	4.52077	2	288/2113	3228/27751	response to abiotic stimulus	3.38e-03	288	evm.model.scaffold100_size686073.47, evm.model.scaffold102_size677817.111, evm.model.scaffold102_size677817.112, evm.model.scaffold102_size677817.162, evm.model.scaffold104_size664890.101, evm.model.scaffold105_size659173.33, evm.model.scaffold106_size656854.45, evm.model.scaffold106_size656854.46, evm.model.scaffold1096_size17718.2, evm.model.scaffold1096_size17718.3, evm.model.scaffold10_size15…
GO:0009507	CC	p	2.93e-02	49	3.7944	6	196/2113	3009/27751	chloroplast	1.62e-02	196	evm.model.scaffold100_size686073.43, evm.model.scaffold100_size686073.45, evm.model.scaffold102_size677817.126, evm.model.scaffold105_size659173.32, evm.model.scaffold10_size1516488.210, evm.model.scaffold111_size649699.60, evm.model.scaffold111_size649699.64, evm.model.scaffold111_size649699.65, evm.model.scaffold1152_size15161.2, evm.model.scaffold1152_size15161.3, evm.model.scaffold117_size639…
GO:0005622	CC	p	3.69e-02	2386	4.9452	2	54/2113	952/27751	intracellular	2.12e-02	54	evm.model.scaffold106_size656854.167, evm.model.scaffold106_size656854.168, evm.model.scaffold109_size652032.89, evm.model.scaffold109_size652032.90, evm.model.scaffold10_size1516488.192, evm.model.scaffold112_size645884.89, evm.model.scaffold118_size635519.88, evm.model.scaffold126_size606685.139, evm.model.scaffold1392_size7328.1, evm.model.scaffold1392_size7328.2, evm.model.scaffold140_size577…
GO:0009536	CC	p	3.72e-02	137	3.75147	5	207/2113	3141/27751	plastid	2.22e-02	207	evm.model.scaffold100_size686073.43, evm.model.scaffold100_size686073.45, evm.model.scaffold102_size677817.111, evm.model.scaffold102_size677817.112, evm.model.scaffold102_size677817.126, evm.model.scaffold105_size659173.32, evm.model.scaffold10_size1516488.210, evm.model.scaffold111_size649699.60, evm.model.scaffold111_size649699.64, evm.model.scaffold111_size649699.65, evm.model.scaffold112_siz…
GO:0005575	CC	p	3.74e-02	4212	1.92976	0	1432/2113	19419/27751	cellular_component	2.31e-02	1432	evm.model.scaffold1002_size25184.4, evm.model.scaffold1002_size25184.5, evm.model.scaffold1007_size24833.2, evm.model.scaffold100_size686073.43, evm.model.scaffold100_size686073.45, evm.model.scaffold1011_size24759.6, evm.model.scaffold1019_size23903.4, evm.model.scaffold1019_size23903.7, evm.model.scaffold101_size679088.14, evm.model.scaffold101_size679088.18, evm.model.scaffold1020_size23896.2,…
GO:0005515	MF	p	4.16e-02	969	2.98118	2	468/2113	6777/27751	protein binding	1.14e-02	468	evm.model.scaffold1009_size24788.10, evm.model.scaffold101_size679088.111, evm.model.scaffold102_size677817.116, evm.model.scaffold102_size677817.117, evm.model.scaffold102_size677817.36, evm.model.scaffold102_size677817.37, evm.model.scaffold102_size677817.38, evm.model.scaffold104_size664890.101, evm.model.scaffold105_size659173.93, evm.model.scaffold105_size659173.94, evm.model.scaffold106_siz…
GO:0005730	CC	p	4.72e-02	26	4.99583	5	52/2113	905/27751	nucleolus	3.01e-02	52	evm.model.scaffold100_size686073.43, evm.model.scaffold100_size686073.45, evm.model.scaffold105_size659173.32, evm.model.scaffold111_size649699.60, evm.model.scaffold112_size645884.51, evm.model.scaffold112_size645884.52, evm.model.scaffold125_size608205.27, evm.model.scaffold125_size608205.28, evm.model.scaffold147_size561064.71, evm.model.scaffold147_size561064.72, evm.model.scaffold14_size1455…

## Sheet: Urenif PROXIMAL+TANDEM
go-basic.obo: fmt(1.2) rel(2019-06-10) 47,442 GO Terms; optional_attrs(relationship)
goslim_plant.obo: fmt(1.2) rel(None) 156 GO Terms
Sections: goatools.test_data.sections.data2018_07_find_enrichment
phosph
GO	NS	enrichment	p_fdr_bh	dcnt	tinfo	depth	ratio_in_study	ratio_in_pop	name	p_uncorrected	study_count	study_items
GO:0016772	MF	e	8.78e-05	601	4.10353	3	320/3096	2206/27751	transferase activity, transferring phosphorus-containing groups	7.33e-06	320	evm.model.scaffold101_size679088.33, evm.model.scaffold101_size679088.34, evm.model.scaffold101_size679088.35, evm.model.scaffold101_size679088.41, evm.model.scaffold101_size679088.44, evm.model.scaffold101_size679088.49, evm.model.scaffold1034_size22948.1, evm.model.scaffold1034_size22948.2, evm.model.scaffold1040_size21852.7, evm.model.scaffold1040_size21852.8, evm.model.scaffold105_size659173.…
GO:0016301	MF	e	8.78e-05	352	4.10353	4	320/3096	2206/27751	kinase activity	7.33e-06	320	evm.model.scaffold101_size679088.33, evm.model.scaffold101_size679088.34, evm.model.scaffold101_size679088.35, evm.model.scaffold101_size679088.41, evm.model.scaffold101_size679088.44, evm.model.scaffold101_size679088.49, evm.model.scaffold1034_size22948.1, evm.model.scaffold1034_size22948.2, evm.model.scaffold1040_size21852.7, evm.model.scaffold1040_size21852.8, evm.model.scaffold105_size659173.…
cellular_component
GO:0005739	CC	p	7.74e-05	95	5.38052	5	35/3096	616/27751	mitochondrion	7.02e-06	35	evm.model.scaffold1152_size15161.2, evm.model.scaffold1152_size15161.3, evm.model.scaffold121_size616638.140, evm.model.scaffold143_size572353.116, evm.model.scaffold143_size572353.118, evm.model.scaffold14_size1455245.13, evm.model.scaffold14_size1455245.15, evm.model.scaffold14_size1455245.276, evm.model.scaffold203_size463369.31, evm.model.scaffold203_size463369.34, evm.model.scaffold237_size4…
GO:0000323	CC	e	4.98e-03	48	6.96748	6	26/3096	126/27751	lytic vacuole	1.66e-03	26	evm.model.scaffold153_size555728.96, evm.model.scaffold166_size521459.95, evm.model.scaffold189_size480584.94, evm.model.scaffold189_size480584.95, evm.model.scaffold208_size452143.28, evm.model.scaffold208_size452143.29, evm.model.scaffold208_size452143.30, evm.model.scaffold223_size435064.138, evm.model.scaffold251_size391187.63, evm.model.scaffold251_size391187.64, evm.model.scaffold286_size35…
GO:0005773	CC	e	1.84e-02	87	5.11168	5	113/3096	806/27751	vacuole	1.05e-02	113	evm.model.scaffold102_size677817.116, evm.model.scaffold102_size677817.117, evm.model.scaffold102_size677817.126, evm.model.scaffold105_size659173.32, evm.model.scaffold108_size655003.138, evm.model.scaffold108_size655003.140, evm.model.scaffold10_size1516488.1, evm.model.scaffold111_size649699.64, evm.model.scaffold111_size649699.65, evm.model.scaffold1152_size15161.2, evm.model.scaffold1152_siz…
Broad
GO	NS	enrichment	p_fdr_bh	dcnt	tinfo	depth	ratio_in_study	ratio_in_pop	name	p_uncorrected	study_count	study_items
GO:0044464	CC	p	7.74e-05	3335	2.17867	1	1502/3096	15140/27751	cell part	1.15e-05	1502	evm.model.scaffold1002_size25184.4, evm.model.scaffold1002_size25184.5, evm.model.scaffold100_size686073.43, evm.model.scaffold100_size686073.45, evm.model.scaffold100_size686073.77, evm.model.scaffold100_size686073.81, evm.model.scaffold1011_size24759.6, evm.model.scaffold1019_size23903.4, evm.model.scaffold1019_size23903.7, evm.model.scaffold101_size679088.14, evm.model.scaffold101_size679088.1…
GO:0009987	BP	p	1.30e-04	18757	2.8421	1	1796/3096	17297/27751	cellular process	1.14e-05	1796	evm.model.scaffold1001_size25237.3, evm.model.scaffold1001_size25237.6, evm.model.scaffold1002_size25184.4, evm.model.scaffold1002_size25184.5, evm.model.scaffold100_size686073.43, evm.model.scaffold100_size686073.45, evm.model.scaffold100_size686073.46, evm.model.scaffold100_size686073.47, evm.model.scaffold100_size686073.77, evm.model.scaffold100_size686073.81, evm.model.scaffold1019_size23903.…
GO:0044237	BP	p	1.30e-04	8670	3.33037	2	1032/3096	10615/27751	cellular metabolic process	1.10e-05	1032	evm.model.scaffold1002_size25184.4, evm.model.scaffold1002_size25184.5, evm.model.scaffold100_size686073.43, evm.model.scaffold100_size686073.45, evm.model.scaffold100_size686073.46, evm.model.scaffold100_size686073.47, evm.model.scaffold100_size686073.77, evm.model.scaffold100_size686073.81, evm.model.scaffold101_size679088.33, evm.model.scaffold101_size679088.35, evm.model.scaffold101_size67908…
GO:0006807	BP	p	1.30e-04	6139	3.28317	2	1101/3096	11128/27751	nitrogen compound metabolic process	1.19e-05	1101	evm.model.scaffold1002_size25184.4, evm.model.scaffold1002_size25184.5, evm.model.scaffold100_size686073.43, evm.model.scaffold100_size686073.45, evm.model.scaffold100_size686073.46, evm.model.scaffold100_size686073.47, evm.model.scaffold100_size686073.77, evm.model.scaffold100_size686073.81, evm.model.scaffold101_size679088.33, evm.model.scaffold101_size679088.35, evm.model.scaffold101_size67908…
GO:1901360	BP	p	1.30e-04	3874	3.85383	3	554/3096	6289/27751	organic cyclic compound metabolic process	9.86e-06	554	evm.model.scaffold100_size686073.43, evm.model.scaffold100_size686073.45, evm.model.scaffold100_size686073.46, evm.model.scaffold100_size686073.47, evm.model.scaffold100_size686073.77, evm.model.scaffold100_size686073.81, evm.model.scaffold102_size677817.126, evm.model.scaffold102_size677817.176, evm.model.scaffold102_size677817.33, evm.model.scaffold1030_size23415.2, evm.model.scaffold1030_size2…
GO:0034641	BP	p	1.30e-04	3512	3.76169	3	608/3096	6896/27751	cellular nitrogen compound metabolic process	1.01e-05	608	evm.model.scaffold100_size686073.43, evm.model.scaffold100_size686073.45, evm.model.scaffold100_size686073.46, evm.model.scaffold100_size686073.47, evm.model.scaffold100_size686073.77, evm.model.scaffold100_size686073.81, evm.model.scaffold102_size677817.126, evm.model.scaffold102_size677817.176, evm.model.scaffold102_size677817.33, evm.model.scaffold1030_size23415.2, evm.model.scaffold1030_size2…
GO:0006725	BP	p	1.30e-04	3345	3.85383	3	554/3096	6289/27751	cellular aromatic compound metabolic process	9.86e-06	554	evm.model.scaffold100_size686073.43, evm.model.scaffold100_size686073.45, evm.model.scaffold100_size686073.46, evm.model.scaffold100_size686073.47, evm.model.scaffold100_size686073.77, evm.model.scaffold100_size686073.81, evm.model.scaffold102_size677817.126, evm.model.scaffold102_size677817.176, evm.model.scaffold102_size677817.33, evm.model.scaffold1030_size23415.2, evm.model.scaffold1030_size2…
GO:0046483	BP	p	1.30e-04	3260	3.85383	3	554/3096	6289/27751	heterocycle metabolic process	9.86e-06	554	evm.model.scaffold100_size686073.43, evm.model.scaffold100_size686073.45, evm.model.scaffold100_size686073.46, evm.model.scaffold100_size686073.47, evm.model.scaffold100_size686073.77, evm.model.scaffold100_size686073.81, evm.model.scaffold102_size677817.126, evm.model.scaffold102_size677817.176, evm.model.scaffold102_size677817.33, evm.model.scaffold1030_size23415.2, evm.model.scaffold1030_size2…
GO:0019748	BP	e	1.30e-04	578	6.28322	2	149/3096	554/27751	secondary metabolic process	3.08e-06	149	evm.model.scaffold1001_size25237.3, evm.model.scaffold1001_size25237.6, evm.model.scaffold100_size686073.47, evm.model.scaffold106_size656854.163, evm.model.scaffold106_size656854.167, evm.model.scaffold106_size656854.168, evm.model.scaffold107_size656107.154, evm.model.scaffold110_size649966.86, evm.model.scaffold110_size649966.87, evm.model.scaffold111_size649699.32, evm.model.scaffold111_size6…
GO:0071704	BP	p	9.50e-04	9043	3.10344	2	1384/3096	13319/27751	organic substance metabolic process	1.07e-04	1384	evm.model.scaffold1001_size25237.3, evm.model.scaffold1001_size25237.6, evm.model.scaffold1002_size25184.4, evm.model.scaffold1002_size25184.5, evm.model.scaffold100_size686073.43, evm.model.scaffold100_size686073.45, evm.model.scaffold100_size686073.46, evm.model.scaffold100_size686073.47, evm.model.scaffold100_size686073.77, evm.model.scaffold100_size686073.81, evm.model.scaffold101_size679088.…
GO:0044238	BP	p	9.50e-04	6646	3.10344	2	1384/3096	13319/27751	primary metabolic process	1.07e-04	1384	evm.model.scaffold1001_size25237.3, evm.model.scaffold1001_size25237.6, evm.model.scaffold1002_size25184.4, evm.model.scaffold1002_size25184.5, evm.model.scaffold100_size686073.43, evm.model.scaffold100_size686073.45, evm.model.scaffold100_size686073.46, evm.model.scaffold100_size686073.47, evm.model.scaffold100_size686073.77, evm.model.scaffold100_size686073.81, evm.model.scaffold101_size679088.…
GO:0016020	CC	e	4.98e-03	1048	2.41612	1	1414/3096	11940/27751	membrane	1.69e-03	1414	evm.model.scaffold1001_size25237.3, evm.model.scaffold1001_size25237.6, evm.model.scaffold1007_size24833.2, evm.model.scaffold100_size686073.45, evm.model.scaffold1011_size24759.6, evm.model.scaffold1019_size23903.4, evm.model.scaffold1019_size23903.7, evm.model.scaffold101_size679088.18, evm.model.scaffold101_size679088.33, evm.model.scaffold101_size679088.35, evm.model.scaffold101_size679088.44…
GO:0005886	CC	e	5.09e-03	473	3.55054	2	485/3096	3840/27751	plasma membrane	2.17e-03	485	evm.model.scaffold1011_size24759.6, evm.model.scaffold1019_size23903.4, evm.model.scaffold1019_size23903.7, evm.model.scaffold101_size679088.33, evm.model.scaffold101_size679088.44, evm.model.scaffold102_size677817.126, evm.model.scaffold105_size659173.12, evm.model.scaffold105_size659173.32, evm.model.scaffold105_size659173.6, evm.model.scaffold105_size659173.88, evm.model.scaffold105_size659173…
GO:0030312	CC	e	4.29e-02	88	5.44766	2	81/3096	576/27751	external encapsulating structure	2.73e-02	81	evm.model.scaffold102_size677817.126, evm.model.scaffold102_size677817.162, evm.model.scaffold111_size649699.64, evm.model.scaffold111_size649699.65, evm.model.scaffold1147_size15341.2, evm.model.scaffold1147_size15341.3, evm.model.scaffold1152_size15161.2, evm.model.scaffold1152_size15161.3, evm.model.scaffold116_size639307.41, evm.model.scaffold116_size639307.42, evm.model.scaffold116_size63930…
GO:0071840	BP	p	4.49e-02	3545	4.15555	1	470/3096	4651/27751	cellular component organization or biogenesis	1.24e-02	470	evm.model.scaffold1002_size25184.4, evm.model.scaffold1002_size25184.5, evm.model.scaffold100_size686073.77, evm.model.scaffold100_size686073.81, evm.model.scaffold101_size679088.14, evm.model.scaffold101_size679088.18, evm.model.scaffold101_size679088.21, evm.model.scaffold102_size677817.126, evm.model.scaffold102_size677817.127, evm.model.scaffold102_size677817.162, evm.model.scaffold102_size67…
Misc.
GO	NS	enrichment	p_fdr_bh	dcnt	tinfo	depth	ratio_in_study	ratio_in_pop	name	p_uncorrected	study_count	study_items
GO:0044424	CC	p	7.74e-05	2384	2.41319	2	1112/3096	11975/27751	intracellular part	1.13e-05	1112	evm.model.scaffold1002_size25184.4, evm.model.scaffold1002_size25184.5, evm.model.scaffold100_size686073.43, evm.model.scaffold100_size686073.45, evm.model.scaffold100_size686073.77, evm.model.scaffold100_size686073.81, evm.model.scaffold1011_size24759.6, evm.model.scaffold1019_size23903.4, evm.model.scaffold1019_size23903.7, evm.model.scaffold101_size679088.14, evm.model.scaffold101_size679088.1…
GO:0043226	CC	p	7.74e-05	1957	2.85726	1	735/3096	7681/27751	organelle	1.02e-05	735	evm.model.scaffold100_size686073.43, evm.model.scaffold100_size686073.45, evm.model.scaffold1011_size24759.6, evm.model.scaffold102_size677817.111, evm.model.scaffold102_size677817.112, evm.model.scaffold102_size677817.116, evm.model.scaffold102_size677817.117, evm.model.scaffold102_size677817.126, evm.model.scaffold102_size677817.127, evm.model.scaffold102_size677817.33, evm.model.scaffold1035_s…
GO:0043229	CC	p	7.74e-05	1784	2.85726	3	735/3096	7681/27751	intracellular organelle	1.02e-05	735	evm.model.scaffold100_size686073.43, evm.model.scaffold100_size686073.45, evm.model.scaffold1011_size24759.6, evm.model.scaffold102_size677817.111, evm.model.scaffold102_size677817.112, evm.model.scaffold102_size677817.116, evm.model.scaffold102_size677817.117, evm.model.scaffold102_size677817.126, evm.model.scaffold102_size677817.127, evm.model.scaffold102_size677817.33, evm.model.scaffold1035_s…
GO:0044444	CC	p	7.74e-05	1270	2.81133	3	754/3096	8042/27751	cytoplasmic part	1.11e-05	754	evm.model.scaffold1002_size25184.4, evm.model.scaffold1002_size25184.5, evm.model.scaffold100_size686073.43, evm.model.scaffold100_size686073.45, evm.model.scaffold1011_size24759.6, evm.model.scaffold102_size677817.111, evm.model.scaffold102_size677817.112, evm.model.scaffold102_size677817.116, evm.model.scaffold102_size677817.117, evm.model.scaffold102_size677817.126, evm.model.scaffold102_size6…
GO:0005576	CC	e	7.74e-05	181	5.5461	1	100/3096	522/27751	extracellular region	3.03e-06	100	evm.model.scaffold1069_size19513.6, evm.model.scaffold113_size644116.7, evm.model.scaffold113_size644116.8, evm.model.scaffold116_size639307.41, evm.model.scaffold116_size639307.42, evm.model.scaffold116_size639307.47, evm.model.scaffold116_size639307.48, evm.model.scaffold121_size616638.63, evm.model.scaffold121_size616638.64, evm.model.scaffold125_size608205.20, evm.model.scaffold125_size608205…
GO:0005634	CC	p	7.92e-05	517	5.43729	5	34/3096	582/27751	nucleus	1.35e-05	34	evm.model.scaffold102_size677817.126, evm.model.scaffold111_size649699.57, evm.model.scaffold113_size644116.75, evm.model.scaffold113_size644116.77, evm.model.scaffold120_size617610.44, evm.model.scaffold121_size616638.3, evm.model.scaffold133_size591675.38, evm.model.scaffold152_size557608.66, evm.model.scaffold161_size531985.123, evm.model.scaffold172_size512938.108, evm.model.scaffold172_size5…
GO:0005829	CC	p	8.62e-05	87	3.86496	4	245/3096	2804/27751	cytosol	1.65e-05	245	evm.model.scaffold1002_size25184.4, evm.model.scaffold1002_size25184.5, evm.model.scaffold102_size677817.126, evm.model.scaffold1040_size21852.7, evm.model.scaffold1040_size21852.8, evm.model.scaffold106_size656854.38, evm.model.scaffold106_size656854.39, evm.model.scaffold106_size656854.40, evm.model.scaffold106_size656854.41, evm.model.scaffold108_size655003.30, evm.model.scaffold108_size655003…
GO:0003674	MF	e	8.78e-05	11075	1.72865	0	2729/3096	23714/27751	molecular_function	1.32e-05	2729	evm.model.scaffold1001_size25237.3, evm.model.scaffold1001_size25237.6, evm.model.scaffold1002_size25184.4, evm.model.scaffold1002_size25184.5, evm.model.scaffold1009_size24788.10, evm.model.scaffold100_size686073.46, evm.model.scaffold100_size686073.47, evm.model.scaffold100_size686073.77, evm.model.scaffold100_size686073.81, evm.model.scaffold1011_size24759.6, evm.model.scaffold1019_size23903.4…
GO:0003824	MF	e	8.78e-05	7519	2.24925	1	1747/3096	14090/27751	catalytic activity	1.15e-05	1747	evm.model.scaffold1001_size25237.3, evm.model.scaffold1001_size25237.6, evm.model.scaffold1002_size25184.4, evm.model.scaffold1002_size25184.5, evm.model.scaffold1009_size24788.10, evm.model.scaffold101_size679088.104, evm.model.scaffold101_size679088.110, evm.model.scaffold101_size679088.111, evm.model.scaffold101_size679088.18, evm.model.scaffold101_size679088.33, evm.model.scaffold101_size6790…
GO:0003676	MF	p	8.78e-05	328	3.08348	3	547/3096	6118/27751	nucleic acid binding	8.95e-06	547	evm.model.scaffold100_size686073.46, evm.model.scaffold100_size686073.47, evm.model.scaffold101_size679088.14, evm.model.scaffold101_size679088.18, evm.model.scaffold101_size679088.21, evm.model.scaffold102_size677817.126, evm.model.scaffold1030_size23415.2, evm.model.scaffold1030_size23415.3, evm.model.scaffold1037_size22605.3, evm.model.scaffold1037_size22605.4, evm.model.scaffold104_size664890…
GO:0003723	MF	p	8.78e-05	171	4.00231	4	200/3096	2441/27751	RNA binding	7.34e-06	200	evm.model.scaffold101_size679088.14, evm.model.scaffold101_size679088.18, evm.model.scaffold101_size679088.21, evm.model.scaffold102_size677817.126, evm.model.scaffold104_size664890.27, evm.model.scaffold104_size664890.29, evm.model.scaffold105_size659173.30, evm.model.scaffold105_size659173.31, evm.model.scaffold105_size659173.32, evm.model.scaffold107_size656107.131, evm.model.scaffold109_size6…
GO:0006139	BP	p	1.30e-04	2463	3.85383	4	554/3096	6289/27751	nucleobase-containing compound metabolic process	9.86e-06	554	evm.model.scaffold100_size686073.43, evm.model.scaffold100_size686073.45, evm.model.scaffold100_size686073.46, evm.model.scaffold100_size686073.47, evm.model.scaffold100_size686073.77, evm.model.scaffold100_size686073.81, evm.model.scaffold102_size677817.126, evm.model.scaffold102_size677817.176, evm.model.scaffold102_size677817.33, evm.model.scaffold1030_size23415.2, evm.model.scaffold1030_size2…
GO:0043228	CC	p	3.12e-04	629	4.25205	2	161/3096	1904/27751	non-membrane-bounded organelle	7.31e-05	161	evm.model.scaffold100_size686073.43, evm.model.scaffold100_size686073.45, evm.model.scaffold102_size677817.126, evm.model.scaffold102_size677817.127, evm.model.scaffold105_size659173.32, evm.model.scaffold107_size656107.75, evm.model.scaffold107_size656107.76, evm.model.scaffold10_size1516488.20, evm.model.scaffold111_size649699.56, evm.model.scaffold111_size649699.60, evm.model.scaffold112_size6…
GO:0043232	CC	p	3.12e-04	601	4.25205	4	161/3096	1904/27751	intracellular non-membrane-bounded organelle	7.31e-05	161	evm.model.scaffold100_size686073.43, evm.model.scaffold100_size686073.45, evm.model.scaffold102_size677817.126, evm.model.scaffold102_size677817.127, evm.model.scaffold105_size659173.32, evm.model.scaffold107_size656107.75, evm.model.scaffold107_size656107.76, evm.model.scaffold10_size1516488.20, evm.model.scaffold111_size649699.56, evm.model.scaffold111_size649699.60, evm.model.scaffold112_size6…
GO:0043227	CC	p	4.50e-04	1367	3.06199	2	614/3096	6259/27751	membrane-bounded organelle	1.15e-04	614	evm.model.scaffold100_size686073.43, evm.model.scaffold100_size686073.45, evm.model.scaffold1011_size24759.6, evm.model.scaffold102_size677817.111, evm.model.scaffold102_size677817.112, evm.model.scaffold102_size677817.116, evm.model.scaffold102_size677817.117, evm.model.scaffold102_size677817.126, evm.model.scaffold102_size677817.33, evm.model.scaffold1035_size22867.6, evm.model.scaffold105_size…
GO:0016740	MF	e	6.94e-04	2462	3.06743	2	779/3096	6217/27751	transferase activity	1.21e-04	779	evm.model.scaffold1009_size24788.10, evm.model.scaffold101_size679088.104, evm.model.scaffold101_size679088.110, evm.model.scaffold101_size679088.111, evm.model.scaffold101_size679088.18, evm.model.scaffold101_size679088.33, evm.model.scaffold101_size679088.34, evm.model.scaffold101_size679088.35, evm.model.scaffold101_size679088.36, evm.model.scaffold101_size679088.41, evm.model.scaffold101_size…
GO:0043231	CC	p	1.43e-03	1050	3.08445	4	606/3096	6120/27751	intracellular membrane-bounded organelle	3.96e-04	606	evm.model.scaffold100_size686073.43, evm.model.scaffold100_size686073.45, evm.model.scaffold102_size677817.111, evm.model.scaffold102_size677817.112, evm.model.scaffold102_size677817.116, evm.model.scaffold102_size677817.117, evm.model.scaffold102_size677817.126, evm.model.scaffold102_size677817.33, evm.model.scaffold1035_size22867.6, evm.model.scaffold105_size659173.32, evm.model.scaffold105_siz…
GO:0005515	MF	p	2.08e-03	969	2.98118	2	677/3096	6777/27751	protein binding	4.17e-04	677	evm.model.scaffold1009_size24788.10, evm.model.scaffold101_size679088.104, evm.model.scaffold101_size679088.111, evm.model.scaffold102_size677817.116, evm.model.scaffold102_size677817.117, evm.model.scaffold102_size677817.36, evm.model.scaffold102_size677817.37, evm.model.scaffold102_size677817.38, evm.model.scaffold104_size664890.101, evm.model.scaffold104_size664890.27, evm.model.scaffold104_si…
GO:0009607	BP	e	3.38e-03	859	5.27854	2	212/3096	1513/27751	response to biotic stimulus	4.14e-04	212	evm.model.scaffold100_size686073.46, evm.model.scaffold105_size659173.88, evm.model.scaffold106_size656854.38, evm.model.scaffold106_size656854.39, evm.model.scaffold106_size656854.40, evm.model.scaffold106_size656854.41, evm.model.scaffold107_size656107.131, evm.model.scaffold107_size656107.154, evm.model.scaffold111_size649699.64, evm.model.scaffold111_size649699.65, evm.model.scaffold1147_size…
GO:0005764	CC	e	4.98e-03	35	6.96748	7	26/3096	126/27751	lysosome	1.66e-03	26	evm.model.scaffold153_size555728.96, evm.model.scaffold166_size521459.95, evm.model.scaffold189_size480584.94, evm.model.scaffold189_size480584.95, evm.model.scaffold208_size452143.28, evm.model.scaffold208_size452143.29, evm.model.scaffold208_size452143.30, evm.model.scaffold223_size435064.138, evm.model.scaffold251_size391187.63, evm.model.scaffold251_size391187.64, evm.model.scaffold286_size35…
GO:0032991	CC	p	5.09e-03	2121	5.52712	1	38/3096	532/27751	protein-containing complex	2.16e-03	38	evm.model.scaffold105_size659173.32, evm.model.scaffold111_size649699.56, evm.model.scaffold114_size641222.149, evm.model.scaffold121_size616638.140, evm.model.scaffold130_size602244.5, evm.model.scaffold130_size602244.7, evm.model.scaffold1317_size8987.2, evm.model.scaffold1317_size8987.3, evm.model.scaffold14_size1455245.276, evm.model.scaffold15_size1429888.170, evm.model.scaffold164_size52829…
GO:1990904	CC	p	5.09e-03	127	5.52712	2	38/3096	532/27751	ribonucleoprotein complex	2.16e-03	38	evm.model.scaffold105_size659173.32, evm.model.scaffold111_size649699.56, evm.model.scaffold114_size641222.149, evm.model.scaffold121_size616638.140, evm.model.scaffold130_size602244.5, evm.model.scaffold130_size602244.7, evm.model.scaffold1317_size8987.2, evm.model.scaffold1317_size8987.3, evm.model.scaffold14_size1455245.276, evm.model.scaffold15_size1429888.170, evm.model.scaffold164_size52829…
GO:0005840	CC	p	5.09e-03	19	5.52712	5	38/3096	532/27751	ribosome	2.16e-03	38	evm.model.scaffold105_size659173.32, evm.model.scaffold111_size649699.56, evm.model.scaffold114_size641222.149, evm.model.scaffold121_size616638.140, evm.model.scaffold130_size602244.5, evm.model.scaffold130_size602244.7, evm.model.scaffold1317_size8987.2, evm.model.scaffold1317_size8987.3, evm.model.scaffold14_size1455245.276, evm.model.scaffold15_size1429888.170, evm.model.scaffold164_size52829…
GO:0044422	CC	p	5.23e-03	1634	4.27651	1	168/3096	1858/27751	organelle part	2.56e-03	168	evm.model.scaffold100_size686073.43, evm.model.scaffold100_size686073.45, evm.model.scaffold102_size677817.116, evm.model.scaffold102_size677817.117, evm.model.scaffold1040_size21852.7, evm.model.scaffold1040_size21852.8, evm.model.scaffold104_size664890.27, evm.model.scaffold104_size664890.29, evm.model.scaffold105_size659173.32, evm.model.scaffold106_size656854.45, evm.model.scaffold106_size656…
GO:0044446	CC	p	5.23e-03	1473	4.27651	3	168/3096	1858/27751	intracellular organelle part	2.56e-03	168	evm.model.scaffold100_size686073.43, evm.model.scaffold100_size686073.45, evm.model.scaffold102_size677817.116, evm.model.scaffold102_size677817.117, evm.model.scaffold1040_size21852.7, evm.model.scaffold1040_size21852.8, evm.model.scaffold104_size664890.27, evm.model.scaffold104_size664890.29, evm.model.scaffold105_size659173.32, evm.model.scaffold106_size656854.45, evm.model.scaffold106_size656…
GO:0044428	CC	p	5.23e-03	496	4.27651	4	168/3096	1858/27751	nuclear part	2.56e-03	168	evm.model.scaffold100_size686073.43, evm.model.scaffold100_size686073.45, evm.model.scaffold102_size677817.116, evm.model.scaffold102_size677817.117, evm.model.scaffold1040_size21852.7, evm.model.scaffold1040_size21852.8, evm.model.scaffold104_size664890.27, evm.model.scaffold104_size664890.29, evm.model.scaffold105_size659173.32, evm.model.scaffold106_size656854.45, evm.model.scaffold106_size656…
GO:0042221	BP	e	5.26e-03	2467	4.1705	2	578/3096	4582/27751	response to chemical	6.98e-04	578	evm.model.scaffold100_size686073.43, evm.model.scaffold100_size686073.45, evm.model.scaffold100_size686073.46, evm.model.scaffold100_size686073.47, evm.model.scaffold1019_size23903.4, evm.model.scaffold1019_size23903.7, evm.model.scaffold102_size677817.126, evm.model.scaffold102_size677817.162, evm.model.scaffold102_size677817.36, evm.model.scaffold102_size677817.37, evm.model.scaffold104_size664…
GO:0005730	CC	p	6.10e-03	26	4.99583	5	74/3096	905/27751	nucleolus	3.11e-03	74	evm.model.scaffold100_size686073.43, evm.model.scaffold100_size686073.45, evm.model.scaffold105_size659173.32, evm.model.scaffold111_size649699.56, evm.model.scaffold111_size649699.60, evm.model.scaffold112_size645884.51, evm.model.scaffold112_size645884.52, evm.model.scaffold125_size608205.27, evm.model.scaffold125_size608205.28, evm.model.scaffold130_size602244.5, evm.model.scaffold130_size6022…
GO:0003682	MF	p	6.31e-03	8	6.18207	2	15/3096	276/27751	chromatin binding	1.42e-03	15	evm.model.scaffold1196_size13094.4, evm.model.scaffold133_size591675.126, evm.model.scaffold133_size591675.127, evm.model.scaffold1392_size7328.1, evm.model.scaffold1392_size7328.2, evm.model.scaffold231_size422325.25, evm.model.scaffold231_size422325.27, evm.model.scaffold315_size338688.65, evm.model.scaffold315_size338688.67, evm.model.scaffold474_size210406.4, evm.model.scaffold474_size210406.…
GO:0097159	MF	p	7.12e-03	493	2.64616	2	980/3096	9474/27751	organic cyclic compound binding	1.96e-03	980	evm.model.scaffold100_size686073.46, evm.model.scaffold100_size686073.47, evm.model.scaffold101_size679088.14, evm.model.scaffold101_size679088.18, evm.model.scaffold101_size679088.21, evm.model.scaffold101_size679088.33, evm.model.scaffold101_size679088.35, evm.model.scaffold101_size679088.41, evm.model.scaffold101_size679088.44, evm.model.scaffold102_size677817.126, evm.model.scaffold102_size67…
GO:1901363	MF	p	7.12e-03	452	2.64616	2	980/3096	9474/27751	heterocyclic compound binding	1.96e-03	980	evm.model.scaffold100_size686073.46, evm.model.scaffold100_size686073.47, evm.model.scaffold101_size679088.14, evm.model.scaffold101_size679088.18, evm.model.scaffold101_size679088.21, evm.model.scaffold101_size679088.33, evm.model.scaffold101_size679088.35, evm.model.scaffold101_size679088.41, evm.model.scaffold101_size679088.44, evm.model.scaffold102_size677817.126, evm.model.scaffold102_size67…
GO:0005622	CC	p	7.34e-03	2386	4.9452	2	79/3096	952/27751	intracellular	3.90e-03	79	evm.model.scaffold106_size656854.167, evm.model.scaffold106_size656854.168, evm.model.scaffold109_size652032.89, evm.model.scaffold109_size652032.90, evm.model.scaffold10_size1516488.192, evm.model.scaffold111_size649699.153, evm.model.scaffold112_size645884.89, evm.model.scaffold118_size635519.88, evm.model.scaffold1216_size11741.2, evm.model.scaffold1216_size11741.4, evm.model.scaffold126_size6…
GO:0005575	CC	p	8.44e-03	4212	1.92976	0	2098/3096	19419/27751	cellular_component	4.67e-03	2098	evm.model.scaffold1001_size25237.3, evm.model.scaffold1001_size25237.6, evm.model.scaffold1002_size25184.4, evm.model.scaffold1002_size25184.5, evm.model.scaffold1007_size24833.2, evm.model.scaffold100_size686073.43, evm.model.scaffold100_size686073.45, evm.model.scaffold100_size686073.77, evm.model.scaffold100_size686073.81, evm.model.scaffold1011_size24759.6, evm.model.scaffold1019_size23903.4,…
GO:0090304	BP	p	1.03e-02	1714	5.61567	5	89/3096	1080/27751	nucleic acid metabolic process	1.57e-03	89	evm.model.scaffold106_size656854.45, evm.model.scaffold106_size656854.46, evm.model.scaffold1084_size18896.2, evm.model.scaffold1096_size17718.2, evm.model.scaffold1096_size17718.3, evm.model.scaffold110_size649966.139, evm.model.scaffold115_size639320.178, evm.model.scaffold115_size639320.179, evm.model.scaffold121_size616638.3, evm.model.scaffold121_size616638.31, evm.model.scaffold121_size6166…
GO:0006259	BP	p	1.03e-02	519	5.61567	6	89/3096	1080/27751	DNA metabolic process	1.57e-03	89	evm.model.scaffold106_size656854.45, evm.model.scaffold106_size656854.46, evm.model.scaffold1084_size18896.2, evm.model.scaffold1096_size17718.2, evm.model.scaffold1096_size17718.3, evm.model.scaffold110_size649966.139, evm.model.scaffold115_size639320.178, evm.model.scaffold115_size639320.179, evm.model.scaffold121_size616638.3, evm.model.scaffold121_size616638.31, evm.model.scaffold121_size6166…
GO:0003677	MF	p	1.24e-02	146	3.75849	4	300/3096	3115/27751	DNA binding	3.73e-03	300	evm.model.scaffold100_size686073.46, evm.model.scaffold100_size686073.47, evm.model.scaffold102_size677817.126, evm.model.scaffold1030_size23415.2, evm.model.scaffold1030_size23415.3, evm.model.scaffold1037_size22605.3, evm.model.scaffold1037_size22605.4, evm.model.scaffold104_size664890.101, evm.model.scaffold104_size664890.27, evm.model.scaffold104_size664890.29, evm.model.scaffold107_size65610…
GO:0008219	BP	e	1.32e-02	508	6.72546	2	59/3096	356/27751	cell death	2.16e-03	59	evm.model.scaffold10_size1516488.5, evm.model.scaffold121_size616638.31, evm.model.scaffold121_size616638.33, evm.model.scaffold14_size1455245.13, evm.model.scaffold14_size1455245.15, evm.model.scaffold153_size555728.96, evm.model.scaffold169_size519396.64, evm.model.scaffold17_size1411551.270, evm.model.scaffold17_size1411551.271, evm.model.scaffold17_size1411551.272, evm.model.scaffold237_size4…
GO:0007049	BP	p	1.33e-02	937	5.60737	2	91/3096	1089/27751	cell cycle	2.30e-03	91	evm.model.scaffold102_size677817.126, evm.model.scaffold121_size616638.31, evm.model.scaffold121_size616638.33, evm.model.scaffold121_size616638.41, evm.model.scaffold133_size591675.126, evm.model.scaffold133_size591675.127, evm.model.scaffold150_size559803.148, evm.model.scaffold152_size557608.64, evm.model.scaffold152_size557608.65, evm.model.scaffold159_size538032.100, evm.model.scaffold159_si…
GO:0036094	MF	e	1.56e-02	186	3.50842	2	497/3096	4000/27751	small molecule binding	6.62e-03	497	evm.model.scaffold101_size679088.33, evm.model.scaffold101_size679088.35, evm.model.scaffold101_size679088.41, evm.model.scaffold101_size679088.44, evm.model.scaffold102_size677817.126, evm.model.scaffold102_size677817.127, evm.model.scaffold1034_size22948.1, evm.model.scaffold1034_size22948.2, evm.model.scaffold1040_size21852.7, evm.model.scaffold1040_size21852.8, evm.model.scaffold1047_size2162…
GO:1901265	MF	e	1.56e-02	58	3.50967	3	497/3096	3995/27751	nucleoside phosphate binding	6.07e-03	497	evm.model.scaffold101_size679088.33, evm.model.scaffold101_size679088.35, evm.model.scaffold101_size679088.41, evm.model.scaffold101_size679088.44, evm.model.scaffold102_size677817.126, evm.model.scaffold102_size677817.127, evm.model.scaffold1034_size22948.1, evm.model.scaffold1034_size22948.2, evm.model.scaffold1040_size21852.7, evm.model.scaffold1040_size21852.8, evm.model.scaffold1047_size2162…
GO:0000166	MF	e	1.56e-02	56	3.50967	4	497/3096	3995/27751	nucleotide binding	6.07e-03	497	evm.model.scaffold101_size679088.33, evm.model.scaffold101_size679088.35, evm.model.scaffold101_size679088.41, evm.model.scaffold101_size679088.44, evm.model.scaffold102_size677817.126, evm.model.scaffold102_size677817.127, evm.model.scaffold1034_size22948.1, evm.model.scaffold1034_size22948.2, evm.model.scaffold1040_size21852.7, evm.model.scaffold1040_size21852.8, evm.model.scaffold1047_size2162…
GO:0140110	MF	p	1.56e-02	29	4.05487	1	219/3096	2316/27751	transcription regulator activity	6.43e-03	219	evm.model.scaffold100_size686073.46, evm.model.scaffold100_size686073.47, evm.model.scaffold102_size677817.126, evm.model.scaffold1030_size23415.2, evm.model.scaffold1030_size23415.3, evm.model.scaffold104_size664890.101, evm.model.scaffold104_size664890.27, evm.model.scaffold104_size664890.29, evm.model.scaffold105_size659173.93, evm.model.scaffold105_size659173.94, evm.model.scaffold107_size656…
GO:0003700	MF	p	1.56e-02	8	4.15564	2	196/3096	2094/27751	DNA-binding transcription factor activity	6.07e-03	196	evm.model.scaffold100_size686073.46, evm.model.scaffold100_size686073.47, evm.model.scaffold102_size677817.126, evm.model.scaffold1030_size23415.2, evm.model.scaffold1030_size23415.3, evm.model.scaffold105_size659173.93, evm.model.scaffold105_size659173.94, evm.model.scaffold107_size656107.113, evm.model.scaffold107_size656107.116, evm.model.scaffold1109_size16905.3, evm.model.scaffold1109_size16…
GO:0016788	MF	p	1.64e-02	559	4.89172	3	86/3096	1003/27751	hydrolase activity, acting on ester bonds	7.81e-03	86	evm.model.scaffold109_size652032.89, evm.model.scaffold109_size652032.90, evm.model.scaffold10_size1516488.250, evm.model.scaffold10_size1516488.302, evm.model.scaffold110_size649966.139, evm.model.scaffold111_size649699.26, evm.model.scaffold112_size645884.89, evm.model.scaffold11_size1489916.302, evm.model.scaffold11_size1489916.305, evm.model.scaffold1216_size11741.2, evm.model.scaffold1216_si…
GO:0004518	MF	p	1.64e-02	107	4.89172	4	86/3096	1003/27751	nuclease activity	7.81e-03	86	evm.model.scaffold109_size652032.89, evm.model.scaffold109_size652032.90, evm.model.scaffold10_size1516488.250, evm.model.scaffold10_size1516488.302, evm.model.scaffold110_size649966.139, evm.model.scaffold111_size649699.26, evm.model.scaffold112_size645884.89, evm.model.scaffold11_size1489916.302, evm.model.scaffold11_size1489916.305, evm.model.scaffold1216_size11741.2, evm.model.scaffold1216_si…
GO:0009314	BP	p	2.46e-02	134	5.69564	3	84/3096	997/27751	response to radiation	4.77e-03	84	evm.model.scaffold102_size677817.111, evm.model.scaffold102_size677817.112, evm.model.scaffold102_size677817.176, evm.model.scaffold106_size656854.45, evm.model.scaffold106_size656854.46, evm.model.scaffold107_size656107.113, evm.model.scaffold107_size656107.116, evm.model.scaffold110_size649966.86, evm.model.scaffold110_size649966.87, evm.model.scaffold114_size641222.46, evm.model.scaffold114_si…
GO:0009416	BP	p	2.46e-02	117	5.69564	4	84/3096	997/27751	response to light stimulus	4.77e-03	84	evm.model.scaffold102_size677817.111, evm.model.scaffold102_size677817.112, evm.model.scaffold102_size677817.176, evm.model.scaffold106_size656854.45, evm.model.scaffold106_size656854.46, evm.model.scaffold107_size656107.113, evm.model.scaffold107_size656107.116, evm.model.scaffold110_size649966.86, evm.model.scaffold110_size649966.87, evm.model.scaffold114_size641222.46, evm.model.scaffold114_si…
GO:0009058	BP	p	2.59e-02	3649	3.67493	2	774/3096	7521/27751	biosynthetic process	5.29e-03	774	evm.model.scaffold1001_size25237.3, evm.model.scaffold1001_size25237.6, evm.model.scaffold1002_size25184.4, evm.model.scaffold1002_size25184.5, evm.model.scaffold100_size686073.46, evm.model.scaffold100_size686073.47, evm.model.scaffold100_size686073.77, evm.model.scaffold100_size686073.81, evm.model.scaffold101_size679088.104, evm.model.scaffold101_size679088.110, evm.model.scaffold101_size67908…
GO:0000003	BP	p	2.70e-02	1302	5.29992	1	133/3096	1481/27751	reproduction	5.79e-03	133	evm.model.scaffold1020_size23896.3, evm.model.scaffold102_size677817.111, evm.model.scaffold102_size677817.112, evm.model.scaffold106_size656854.45, evm.model.scaffold106_size656854.46, evm.model.scaffold10_size1516488.210, evm.model.scaffold118_size635519.89, evm.model.scaffold119_size622808.139, evm.model.scaffold119_size622808.140, evm.model.scaffold121_size616638.3, evm.model.scaffold134_size…
GO:0023052	BP	e	3.06e-02	2291	8.0786	1	19/3096	92/27751	signaling	7.17e-03	19	evm.model.scaffold1035_size22867.6, evm.model.scaffold106_size656854.38, evm.model.scaffold106_size656854.39, evm.model.scaffold106_size656854.40, evm.model.scaffold106_size656854.41, evm.model.scaffold111_size649699.88, evm.model.scaffold111_size649699.89, evm.model.scaffold111_size649699.90, evm.model.scaffold164_size528297.109, evm.model.scaffold164_size528297.110, evm.model.scaffold267_size37…
GO:0007267	BP	e	3.06e-02	657	8.0786	3	19/3096	92/27751	cell-cell signaling	7.17e-03	19	evm.model.scaffold1035_size22867.6, evm.model.scaffold106_size656854.38, evm.model.scaffold106_size656854.39, evm.model.scaffold106_size656854.40, evm.model.scaffold106_size656854.41, evm.model.scaffold111_size649699.88, evm.model.scaffold111_size649699.89, evm.model.scaffold111_size649699.90, evm.model.scaffold164_size528297.109, evm.model.scaffold164_size528297.110, evm.model.scaffold267_size37…
GO:0009605	BP	e	3.76e-02	1564	4.92717	2	277/3096	2150/27751	response to external stimulus	9.20e-03	277	evm.model.scaffold100_size686073.43, evm.model.scaffold100_size686073.45, evm.model.scaffold100_size686073.46, evm.model.scaffold102_size677817.162, evm.model.scaffold105_size659173.88, evm.model.scaffold106_size656854.38, evm.model.scaffold106_size656854.39, evm.model.scaffold106_size656854.40, evm.model.scaffold106_size656854.41, evm.model.scaffold107_size656107.131, evm.model.scaffold107_size6…
GO:0009579	CC	p	4.29e-02	62	5.26563	3	59/3096	691/27751	thylakoid	2.74e-02	59	evm.model.scaffold111_size649699.64, evm.model.scaffold111_size649699.65, evm.model.scaffold120_size617610.154, evm.model.scaffold120_size617610.155, evm.model.scaffold1321_size8904.2, evm.model.scaffold14_size1455245.276, evm.model.scaffold157_size542792.8, evm.model.scaffold15_size1429888.60, evm.model.scaffold15_size1429888.65, evm.model.scaffold206_size458013.94, evm.model.scaffold206_size458…
GO:0005618	CC	e	4.29e-02	45	5.45463	3	81/3096	572/27751	cell wall	2.65e-02	81	evm.model.scaffold102_size677817.126, evm.model.scaffold102_size677817.162, evm.model.scaffold111_size649699.64, evm.model.scaffold111_size649699.65, evm.model.scaffold1147_size15341.2, evm.model.scaffold1147_size15341.3, evm.model.scaffold1152_size15161.2, evm.model.scaffold1152_size15161.3, evm.model.scaffold116_size639307.41, evm.model.scaffold116_size639307.42, evm.model.scaffold116_size63930…
GO:0065009	BP	e	4.36e-02	1022	6.52275	2	66/3096	436/27751	regulation of molecular function	1.11e-02	66	evm.model.scaffold104_size664890.27, evm.model.scaffold104_size664890.29, evm.model.scaffold106_size656854.38, evm.model.scaffold106_size656854.39, evm.model.scaffold106_size656854.40, evm.model.scaffold106_size656854.41, evm.model.scaffold1096_size17718.2, evm.model.scaffold1096_size17718.3, evm.model.scaffold10_size1516488.20, evm.model.scaffold124_size609810.143, evm.model.scaffold150_size5598…
GO:0016043	BP	p	4.49e-02	3363	4.15555	2	470/3096	4651/27751	cellular component organization	1.24e-02	470	evm.model.scaffold1002_size25184.4, evm.model.scaffold1002_size25184.5, evm.model.scaffold100_size686073.77, evm.model.scaffold100_size686073.81, evm.model.scaffold101_size679088.14, evm.model.scaffold101_size679088.18, evm.model.scaffold101_size679088.21, evm.model.scaffold102_size677817.126, evm.model.scaffold102_size677817.127, evm.model.scaffold102_size677817.162, evm.model.scaffold102_size67…

## Sheet: Ugibba PROXIMAL+TANDEM
go-basic.obo: fmt(1.2) rel(2019-06-10) 47,442 GO Terms; optional_attrs(relationship)
goslim_plant.obo: fmt(1.2) rel(None) 156 GO Terms
Sections: goatools.test_data.sections.data2018_07_find_enrichment
microtubule
GO	NS	enrichment	p_fdr_bh	dcnt	tinfo	depth	ratio_in_study	ratio_in_pop	name	p_uncorrected	study_count	study_items
GO:0005856	CC	p	1.52e-04	274	5.33807	5	5/880	410/17760	cytoskeleton	7.13e-05	5	evm.model.Ug_unitig_0.2457, evm.model.Ug_unitig_26.949, evm.model.Ug_unitig_37.333, evm.model.Ug_unitig_8.360, evm.model.Ug_unitig_88.118
protein
GO:0044267	BP	p	3.92e-05	1726	4.14756	5	91/880	2982/17760	cellular protein metabolic process	5.44e-06	91	evm.model.Ug_unitig_0.1131, evm.model.Ug_unitig_0.1170, evm.model.Ug_unitig_0.1171, evm.model.Ug_unitig_0.1172, evm.model.Ug_unitig_0.121, evm.model.Ug_unitig_0.123, evm.model.Ug_unitig_0.1311, evm.model.Ug_unitig_0.1727, evm.model.Ug_unitig_0.1929, evm.model.Ug_unitig_21.325, evm.model.Ug_unitig_21.331, evm.model.Ug_unitig_21.334, evm.model.Ug_unitig_21.339, evm.model.Ug_unitig_21.371, evm.model…
GO:0036211	BP	p	1.54e-04	1322	4.3457	5	82/880	2446/17760	protein modification process	4.62e-05	82	evm.model.Ug_unitig_0.1170, evm.model.Ug_unitig_0.1171, evm.model.Ug_unitig_0.1172, evm.model.Ug_unitig_0.121, evm.model.Ug_unitig_0.123, evm.model.Ug_unitig_0.1727, evm.model.Ug_unitig_0.1929, evm.model.Ug_unitig_21.325, evm.model.Ug_unitig_21.331, evm.model.Ug_unitig_21.334, evm.model.Ug_unitig_21.339, evm.model.Ug_unitig_22.296, evm.model.Ug_unitig_22.313, evm.model.Ug_unitig_22.320, evm.model…
GO:0006412	BP	p	1.54e-04	215	5.78489	7	10/880	580/17760	translation	5.67e-05	10	evm.model.Ug_unitig_0.1131, evm.model.Ug_unitig_0.1311, evm.model.Ug_unitig_21.371, evm.model.Ug_unitig_37.334, evm.model.Ug_unitig_46.301, evm.model.Ug_unitig_736.389, evm.model.Ug_unitig_736.390, evm.model.Ug_unitig_749.515, evm.model.Ug_unitig_899.146, evm.model.Ug_unitig_899.147
GO:0006464	BP	p	1.54e-04	1320	4.3457	6	82/880	2446/17760	cellular protein modification process	4.62e-05	82	evm.model.Ug_unitig_0.1170, evm.model.Ug_unitig_0.1171, evm.model.Ug_unitig_0.1172, evm.model.Ug_unitig_0.121, evm.model.Ug_unitig_0.123, evm.model.Ug_unitig_0.1727, evm.model.Ug_unitig_0.1929, evm.model.Ug_unitig_21.325, evm.model.Ug_unitig_21.331, evm.model.Ug_unitig_21.334, evm.model.Ug_unitig_21.339, evm.model.Ug_unitig_22.296, evm.model.Ug_unitig_22.313, evm.model.Ug_unitig_22.320, evm.model…
GO:0019538	BP	p	2.17e-04	2175	3.93752	4	137/880	3679/17760	protein metabolic process	8.41e-05	137	evm.model.Ug_unitig_0.1131, evm.model.Ug_unitig_0.1170, evm.model.Ug_unitig_0.1171, evm.model.Ug_unitig_0.1172, evm.model.Ug_unitig_0.121, evm.model.Ug_unitig_0.123, evm.model.Ug_unitig_0.1311, evm.model.Ug_unitig_0.1727, evm.model.Ug_unitig_0.1929, evm.model.Ug_unitig_21.325, evm.model.Ug_unitig_21.331, evm.model.Ug_unitig_21.334, evm.model.Ug_unitig_21.339, evm.model.Ug_unitig_21.371, evm.model…
cellular_component
GO:0000323	CC	e	1.03e-03	48	6.9722	6	12/880	80/17760	lytic vacuole	5.47e-04	12	evm.model.Ug_unitig_37.666, evm.model.Ug_unitig_37.667, evm.model.Ug_unitig_578.660, evm.model.Ug_unitig_578.665, evm.model.Ug_unitig_699.299, evm.model.Ug_unitig_699.300, evm.model.Ug_unitig_699.301, evm.model.Ug_unitig_699.310, evm.model.Ug_unitig_699.312, evm.model.Ug_unitig_85.134, evm.model.Ug_unitig_85.135, evm.model.Ug_unitig_85.137
GO:0031410	CC	p	1.37e-03	290	6.04102	5	1/880	203/17760	cytoplasmic vesicle	8.46e-04	1	evm.model.Ug_unitig_0.747
GO:0005768	CC	p	1.37e-03	77	6.04102	6	1/880	203/17760	endosome	8.46e-04	1	evm.model.Ug_unitig_0.747
GO:0005739	CC	p	4.76e-03	95	5.35034	5	8/880	405/17760	mitochondrion	3.44e-03	8	evm.model.Ug_unitig_27.259, evm.model.Ug_unitig_27.260, evm.model.Ug_unitig_699.332, evm.model.Ug_unitig_699.460, evm.model.Ug_unitig_92.118, evm.model.Ug_unitig_92.123, evm.model.Ug_unitig_92.158, evm.model.Ug_unitig_92.161
GO:0005783	CC	p	8.59e-03	107	5.27658	5	10/880	436/17760	endoplasmic reticulum	6.94e-03	10	evm.model.Ug_unitig_22.296, evm.model.Ug_unitig_26.872, evm.model.Ug_unitig_31.5, evm.model.Ug_unitig_578.733, evm.model.Ug_unitig_61.100, evm.model.Ug_unitig_61.368, evm.model.Ug_unitig_61.99, evm.model.Ug_unitig_8.926, evm.model.Ug_unitig_899.883, evm.model.Ug_unitig_899.885
Broad
GO	NS	enrichment	p_fdr_bh	dcnt	tinfo	depth	ratio_in_study	ratio_in_pop	name	p_uncorrected	study_count	study_items
GO:0044464	CC	p	1.48e-05	3335	2.18013	1	322/880	9644/17760	cell part	6.21e-06	322	evm.model.Ug_unitig_0.109, evm.model.Ug_unitig_0.1101, evm.model.Ug_unitig_0.1102, evm.model.Ug_unitig_0.1131, evm.model.Ug_unitig_0.1135, evm.model.Ug_unitig_0.121, evm.model.Ug_unitig_0.123, evm.model.Ug_unitig_0.1251, evm.model.Ug_unitig_0.1306, evm.model.Ug_unitig_0.1307, evm.model.Ug_unitig_0.1308, evm.model.Ug_unitig_0.1311, evm.model.Ug_unitig_0.1661, evm.model.Ug_unitig_0.1662, evm.model.…
GO:0009987	BP	p	3.92e-05	18757	2.83375	1	435/880	11094/17760	cellular process	5.55e-06	435	evm.model.Ug_unitig_0.109, evm.model.Ug_unitig_0.1101, evm.model.Ug_unitig_0.1102, evm.model.Ug_unitig_0.1112, evm.model.Ug_unitig_0.1113, evm.model.Ug_unitig_0.1114, evm.model.Ug_unitig_0.1131, evm.model.Ug_unitig_0.1170, evm.model.Ug_unitig_0.1171, evm.model.Ug_unitig_0.1172, evm.model.Ug_unitig_0.1201, evm.model.Ug_unitig_0.1202, evm.model.Ug_unitig_0.1206, evm.model.Ug_unitig_0.1208, evm.mode…
GO:0071704	BP	p	3.92e-05	9043	3.10174	2	337/880	8486/17760	organic substance metabolic process	6.58e-06	337	evm.model.Ug_unitig_0.1131, evm.model.Ug_unitig_0.1170, evm.model.Ug_unitig_0.1171, evm.model.Ug_unitig_0.1172, evm.model.Ug_unitig_0.1201, evm.model.Ug_unitig_0.1202, evm.model.Ug_unitig_0.1206, evm.model.Ug_unitig_0.121, evm.model.Ug_unitig_0.123, evm.model.Ug_unitig_0.1250, evm.model.Ug_unitig_0.1251, evm.model.Ug_unitig_0.1306, evm.model.Ug_unitig_0.1307, evm.model.Ug_unitig_0.1308, evm.model…
GO:0044237	BP	p	3.92e-05	8670	3.3281	2	169/880	6767/17760	cellular metabolic process	5.92e-06	169	evm.model.Ug_unitig_0.1131, evm.model.Ug_unitig_0.1170, evm.model.Ug_unitig_0.1171, evm.model.Ug_unitig_0.1172, evm.model.Ug_unitig_0.1201, evm.model.Ug_unitig_0.1202, evm.model.Ug_unitig_0.1206, evm.model.Ug_unitig_0.121, evm.model.Ug_unitig_0.123, evm.model.Ug_unitig_0.1311, evm.model.Ug_unitig_0.1727, evm.model.Ug_unitig_0.1929, evm.model.Ug_unitig_0.1966, evm.model.Ug_unitig_0.2501, evm.model…
GO:0044238	BP	p	3.92e-05	6646	3.10174	2	337/880	8486/17760	primary metabolic process	6.58e-06	337	evm.model.Ug_unitig_0.1131, evm.model.Ug_unitig_0.1170, evm.model.Ug_unitig_0.1171, evm.model.Ug_unitig_0.1172, evm.model.Ug_unitig_0.1201, evm.model.Ug_unitig_0.1202, evm.model.Ug_unitig_0.1206, evm.model.Ug_unitig_0.121, evm.model.Ug_unitig_0.123, evm.model.Ug_unitig_0.1250, evm.model.Ug_unitig_0.1251, evm.model.Ug_unitig_0.1306, evm.model.Ug_unitig_0.1307, evm.model.Ug_unitig_0.1308, evm.model…
GO:0006807	BP	p	3.92e-05	6139	3.28486	2	210/880	7066/17760	nitrogen compound metabolic process	5.93e-06	210	evm.model.Ug_unitig_0.1131, evm.model.Ug_unitig_0.1170, evm.model.Ug_unitig_0.1171, evm.model.Ug_unitig_0.1172, evm.model.Ug_unitig_0.1201, evm.model.Ug_unitig_0.1202, evm.model.Ug_unitig_0.1206, evm.model.Ug_unitig_0.121, evm.model.Ug_unitig_0.123, evm.model.Ug_unitig_0.1311, evm.model.Ug_unitig_0.1727, evm.model.Ug_unitig_0.1929, evm.model.Ug_unitig_0.1966, evm.model.Ug_unitig_0.2501, evm.model…
GO:1901360	BP	p	3.92e-05	3874	3.84714	3	85/880	4027/17760	organic cyclic compound metabolic process	4.33e-06	85	evm.model.Ug_unitig_0.1201, evm.model.Ug_unitig_0.1202, evm.model.Ug_unitig_0.1206, evm.model.Ug_unitig_0.1966, evm.model.Ug_unitig_0.2501, evm.model.Ug_unitig_0.438, evm.model.Ug_unitig_0.439, evm.model.Ug_unitig_0.745, evm.model.Ug_unitig_0.748, evm.model.Ug_unitig_0.750, evm.model.Ug_unitig_21.326, evm.model.Ug_unitig_21.369, evm.model.Ug_unitig_21.371, evm.model.Ug_unitig_22.1110, evm.model.U…
GO:0034641	BP	p	3.92e-05	3512	3.75447	3	89/880	4418/17760	cellular nitrogen compound metabolic process	4.90e-06	89	evm.model.Ug_unitig_0.1131, evm.model.Ug_unitig_0.1201, evm.model.Ug_unitig_0.1202, evm.model.Ug_unitig_0.1206, evm.model.Ug_unitig_0.1311, evm.model.Ug_unitig_0.1966, evm.model.Ug_unitig_0.2501, evm.model.Ug_unitig_0.438, evm.model.Ug_unitig_0.439, evm.model.Ug_unitig_0.745, evm.model.Ug_unitig_0.748, evm.model.Ug_unitig_0.750, evm.model.Ug_unitig_21.326, evm.model.Ug_unitig_21.369, evm.model.Ug…
GO:0044260	BP	p	3.92e-05	3465	4.01198	4	105/880	3415/17760	cellular macromolecule metabolic process	4.81e-06	105	evm.model.Ug_unitig_0.1131, evm.model.Ug_unitig_0.1170, evm.model.Ug_unitig_0.1171, evm.model.Ug_unitig_0.1172, evm.model.Ug_unitig_0.121, evm.model.Ug_unitig_0.123, evm.model.Ug_unitig_0.1311, evm.model.Ug_unitig_0.1727, evm.model.Ug_unitig_0.1929, evm.model.Ug_unitig_21.325, evm.model.Ug_unitig_21.331, evm.model.Ug_unitig_21.334, evm.model.Ug_unitig_21.339, evm.model.Ug_unitig_21.371, evm.model…
GO:0006725	BP	p	3.92e-05	3345	3.84714	3	85/880	4027/17760	cellular aromatic compound metabolic process	4.33e-06	85	evm.model.Ug_unitig_0.1201, evm.model.Ug_unitig_0.1202, evm.model.Ug_unitig_0.1206, evm.model.Ug_unitig_0.1966, evm.model.Ug_unitig_0.2501, evm.model.Ug_unitig_0.438, evm.model.Ug_unitig_0.439, evm.model.Ug_unitig_0.745, evm.model.Ug_unitig_0.748, evm.model.Ug_unitig_0.750, evm.model.Ug_unitig_21.326, evm.model.Ug_unitig_21.369, evm.model.Ug_unitig_21.371, evm.model.Ug_unitig_22.1110, evm.model.U…
GO:0046483	BP	p	3.92e-05	3260	3.84714	3	85/880	4027/17760	heterocycle metabolic process	4.33e-06	85	evm.model.Ug_unitig_0.1201, evm.model.Ug_unitig_0.1202, evm.model.Ug_unitig_0.1206, evm.model.Ug_unitig_0.1966, evm.model.Ug_unitig_0.2501, evm.model.Ug_unitig_0.438, evm.model.Ug_unitig_0.439, evm.model.Ug_unitig_0.745, evm.model.Ug_unitig_0.748, evm.model.Ug_unitig_0.750, evm.model.Ug_unitig_21.326, evm.model.Ug_unitig_21.369, evm.model.Ug_unitig_21.371, evm.model.Ug_unitig_22.1110, evm.model.U…
GO:0071840	BP	p	3.92e-05	3545	4.19144	1	63/880	2854/17760	cellular component organization or biogenesis	4.65e-06	63	evm.model.Ug_unitig_0.1101, evm.model.Ug_unitig_0.1102, evm.model.Ug_unitig_0.1208, evm.model.Ug_unitig_0.2056, evm.model.Ug_unitig_0.2057, evm.model.Ug_unitig_0.950, evm.model.Ug_unitig_0.951, evm.model.Ug_unitig_0.953, evm.model.Ug_unitig_0.955, evm.model.Ug_unitig_21.369, evm.model.Ug_unitig_21.371, evm.model.Ug_unitig_22.1150, evm.model.Ug_unitig_22.1151, evm.model.Ug_unitig_22.1288, evm.mode…
GO:0019748	BP	e	3.92e-05	578	6.44413	2	52/880	300/17760	secondary metabolic process	1.06e-06	52	evm.model.Ug_unitig_0.1306, evm.model.Ug_unitig_0.341, evm.model.Ug_unitig_21.14, evm.model.Ug_unitig_21.15, evm.model.Ug_unitig_22.1020, evm.model.Ug_unitig_22.1405, evm.model.Ug_unitig_22.1407, evm.model.Ug_unitig_22.533, evm.model.Ug_unitig_22.534, evm.model.Ug_unitig_22.593, evm.model.Ug_unitig_22.598, evm.model.Ug_unitig_22.848, evm.model.Ug_unitig_22.851, evm.model.Ug_unitig_27.208, evm.mod…
GO:0016020	CC	e	5.57e-05	1048	2.38532	1	451/880	7855/17760	membrane	2.49e-05	451	evm.model.Ug_unitig_0.1101, evm.model.Ug_unitig_0.1102, evm.model.Ug_unitig_0.1135, evm.model.Ug_unitig_0.1306, evm.model.Ug_unitig_0.1308, evm.model.Ug_unitig_0.1310, evm.model.Ug_unitig_0.1405, evm.model.Ug_unitig_0.1406, evm.model.Ug_unitig_0.1410, evm.model.Ug_unitig_0.1415, evm.model.Ug_unitig_0.1661, evm.model.Ug_unitig_0.1662, evm.model.Ug_unitig_0.1663, evm.model.Ug_unitig_0.1727, evm.mod…
GO:0043170	BP	p	7.28e-05	4535	3.83088	3	151/880	4093/17760	macromolecule metabolic process	1.56e-05	151	evm.model.Ug_unitig_0.1131, evm.model.Ug_unitig_0.1170, evm.model.Ug_unitig_0.1171, evm.model.Ug_unitig_0.1172, evm.model.Ug_unitig_0.121, evm.model.Ug_unitig_0.123, evm.model.Ug_unitig_0.1311, evm.model.Ug_unitig_0.1727, evm.model.Ug_unitig_0.1929, evm.model.Ug_unitig_21.325, evm.model.Ug_unitig_21.331, evm.model.Ug_unitig_21.334, evm.model.Ug_unitig_21.339, evm.model.Ug_unitig_21.371, evm.model…
GO:0043412	BP	p	1.54e-04	1487	4.3457	4	82/880	2446/17760	macromolecule modification	4.62e-05	82	evm.model.Ug_unitig_0.1170, evm.model.Ug_unitig_0.1171, evm.model.Ug_unitig_0.1172, evm.model.Ug_unitig_0.121, evm.model.Ug_unitig_0.123, evm.model.Ug_unitig_0.1727, evm.model.Ug_unitig_0.1929, evm.model.Ug_unitig_21.325, evm.model.Ug_unitig_21.331, evm.model.Ug_unitig_21.334, evm.model.Ug_unitig_21.339, evm.model.Ug_unitig_22.296, evm.model.Ug_unitig_22.313, evm.model.Ug_unitig_22.320, evm.model…
GO:0043603	BP	p	1.54e-04	632	5.78489	4	10/880	580/17760	cellular amide metabolic process	5.67e-05	10	evm.model.Ug_unitig_0.1131, evm.model.Ug_unitig_0.1311, evm.model.Ug_unitig_21.371, evm.model.Ug_unitig_37.334, evm.model.Ug_unitig_46.301, evm.model.Ug_unitig_736.389, evm.model.Ug_unitig_736.390, evm.model.Ug_unitig_749.515, evm.model.Ug_unitig_899.146, evm.model.Ug_unitig_899.147
GO:0006518	BP	p	1.54e-04	356	5.78489	5	10/880	580/17760	peptide metabolic process	5.67e-05	10	evm.model.Ug_unitig_0.1131, evm.model.Ug_unitig_0.1311, evm.model.Ug_unitig_21.371, evm.model.Ug_unitig_37.334, evm.model.Ug_unitig_46.301, evm.model.Ug_unitig_736.389, evm.model.Ug_unitig_736.390, evm.model.Ug_unitig_749.515, evm.model.Ug_unitig_899.146, evm.model.Ug_unitig_899.147
GO:1901564	BP	p	2.17e-04	4182	3.93752	3	137/880	3679/17760	organonitrogen compound metabolic process	8.41e-05	137	evm.model.Ug_unitig_0.1131, evm.model.Ug_unitig_0.1170, evm.model.Ug_unitig_0.1171, evm.model.Ug_unitig_0.1172, evm.model.Ug_unitig_0.121, evm.model.Ug_unitig_0.123, evm.model.Ug_unitig_0.1311, evm.model.Ug_unitig_0.1727, evm.model.Ug_unitig_0.1929, evm.model.Ug_unitig_21.325, evm.model.Ug_unitig_21.331, evm.model.Ug_unitig_21.334, evm.model.Ug_unitig_21.339, evm.model.Ug_unitig_21.371, evm.model…
GO:0031975	CC	p	4.42e-03	164	6.54204	2	0/880	123/17760	envelope	3.01e-03	0
GO:0008152	BP	p	1.29e-02	9767	2.90899	1	470/880	10290/17760	metabolic process	5.64e-03	470	evm.model.Ug_unitig_0.1131, evm.model.Ug_unitig_0.1170, evm.model.Ug_unitig_0.1171, evm.model.Ug_unitig_0.1172, evm.model.Ug_unitig_0.1201, evm.model.Ug_unitig_0.1202, evm.model.Ug_unitig_0.1206, evm.model.Ug_unitig_0.121, evm.model.Ug_unitig_0.123, evm.model.Ug_unitig_0.1250, evm.model.Ug_unitig_0.1251, evm.model.Ug_unitig_0.1306, evm.model.Ug_unitig_0.1307, evm.model.Ug_unitig_0.1308, evm.model…
GO:0030312	CC	e	1.32e-02	88	5.51358	2	28/880	344/17760	external encapsulating structure	1.12e-02	28	evm.model.Ug_unitig_0.815, evm.model.Ug_unitig_22.1150, evm.model.Ug_unitig_22.1151, evm.model.Ug_unitig_22.593, evm.model.Ug_unitig_22.598, evm.model.Ug_unitig_26.1434, evm.model.Ug_unitig_32.515, evm.model.Ug_unitig_32.517, evm.model.Ug_unitig_32.519, evm.model.Ug_unitig_32.522, evm.model.Ug_unitig_37.666, evm.model.Ug_unitig_37.667, evm.model.Ug_unitig_46.638, evm.model.Ug_unitig_52.529, evm.m…
Misc.
GO	NS	enrichment	p_fdr_bh	dcnt	tinfo	depth	ratio_in_study	ratio_in_pop	name	p_uncorrected	study_count	study_items
GO:0043228	CC	p	1.45e-05	629	4.29032	2	14/880	1169/17760	non-membrane-bounded organelle	3.54e-06	14	evm.model.Ug_unitig_0.109, evm.model.Ug_unitig_0.1131, evm.model.Ug_unitig_0.1311, evm.model.Ug_unitig_0.2457, evm.model.Ug_unitig_26.949, evm.model.Ug_unitig_37.333, evm.model.Ug_unitig_37.334, evm.model.Ug_unitig_578.577, evm.model.Ug_unitig_748.978, evm.model.Ug_unitig_8.219, evm.model.Ug_unitig_8.220, evm.model.Ug_unitig_8.360, evm.model.Ug_unitig_8.418, evm.model.Ug_unitig_88.118
GO:0043232	CC	p	1.45e-05	601	4.29032	4	14/880	1169/17760	intracellular non-membrane-bounded organelle	3.54e-06	14	evm.model.Ug_unitig_0.109, evm.model.Ug_unitig_0.1131, evm.model.Ug_unitig_0.1311, evm.model.Ug_unitig_0.2457, evm.model.Ug_unitig_26.949, evm.model.Ug_unitig_37.333, evm.model.Ug_unitig_37.334, evm.model.Ug_unitig_578.577, evm.model.Ug_unitig_748.978, evm.model.Ug_unitig_8.219, evm.model.Ug_unitig_8.220, evm.model.Ug_unitig_8.360, evm.model.Ug_unitig_8.418, evm.model.Ug_unitig_88.118
GO:0044422	CC	p	1.45e-05	1634	4.34211	1	8/880	1110/17760	organelle part	2.00e-06	8	evm.model.Ug_unitig_0.109, evm.model.Ug_unitig_0.1131, evm.model.Ug_unitig_37.374, evm.model.Ug_unitig_60.222, evm.model.Ug_unitig_748.978, evm.model.Ug_unitig_8.418, evm.model.Ug_unitig_899.449, evm.model.Ug_unitig_899.451
GO:0044446	CC	p	1.45e-05	1473	4.34211	3	8/880	1110/17760	intracellular organelle part	2.00e-06	8	evm.model.Ug_unitig_0.109, evm.model.Ug_unitig_0.1131, evm.model.Ug_unitig_37.374, evm.model.Ug_unitig_60.222, evm.model.Ug_unitig_748.978, evm.model.Ug_unitig_8.418, evm.model.Ug_unitig_899.449, evm.model.Ug_unitig_899.451
GO:0005737	CC	p	1.45e-05	1275	3.63155	3	59/880	2259/17760	cytoplasm	3.53e-06	59	evm.model.Ug_unitig_0.1135, evm.model.Ug_unitig_0.123, evm.model.Ug_unitig_0.1662, evm.model.Ug_unitig_0.2457, evm.model.Ug_unitig_0.408, evm.model.Ug_unitig_0.747, evm.model.Ug_unitig_0.974, evm.model.Ug_unitig_0.977, evm.model.Ug_unitig_21.162, evm.model.Ug_unitig_21.163, evm.model.Ug_unitig_21.167, evm.model.Ug_unitig_21.168, evm.model.Ug_unitig_22.296, evm.model.Ug_unitig_26.872, evm.model.Ug…
GO:0005634	CC	p	1.45e-05	517	5.54308	5	1/880	334/17760	nucleus	2.28e-06	1	evm.model.Ug_unitig_736.277
GO:0044428	CC	p	1.45e-05	496	4.34211	4	8/880	1110/17760	nuclear part	2.00e-06	8	evm.model.Ug_unitig_0.109, evm.model.Ug_unitig_0.1131, evm.model.Ug_unitig_37.374, evm.model.Ug_unitig_60.222, evm.model.Ug_unitig_748.978, evm.model.Ug_unitig_8.418, evm.model.Ug_unitig_899.449, evm.model.Ug_unitig_899.451
GO:0005654	CC	p	1.45e-05	122	4.94076	5	6/880	610/17760	nucleoplasm	2.30e-06	6	evm.model.Ug_unitig_37.374, evm.model.Ug_unitig_60.222, evm.model.Ug_unitig_748.978, evm.model.Ug_unitig_8.418, evm.model.Ug_unitig_899.449, evm.model.Ug_unitig_899.451
GO:0005730	CC	p	1.45e-05	26	5.08892	5	4/880	526/17760	nucleolus	1.94e-06	4	evm.model.Ug_unitig_0.109, evm.model.Ug_unitig_0.1131, evm.model.Ug_unitig_748.978, evm.model.Ug_unitig_8.418
GO:0005576	CC	e	1.45e-05	181	5.50202	1	54/880	348/17760	extracellular region	9.98e-07	54	evm.model.Ug_unitig_22.1145, evm.model.Ug_unitig_22.1146, evm.model.Ug_unitig_22.1285, evm.model.Ug_unitig_22.593, evm.model.Ug_unitig_22.598, evm.model.Ug_unitig_23.11, evm.model.Ug_unitig_23.5, evm.model.Ug_unitig_23.6, evm.model.Ug_unitig_23.7, evm.model.Ug_unitig_23.8, evm.model.Ug_unitig_26.1434, evm.model.Ug_unitig_26.183, evm.model.Ug_unitig_27.173, evm.model.Ug_unitig_27.175, evm.model.Ug…
GO:0009536	CC	p	1.45e-05	137	3.73695	5	46/880	2033/17760	plastid	3.54e-06	46	evm.model.Ug_unitig_0.1101, evm.model.Ug_unitig_0.1102, evm.model.Ug_unitig_0.1251, evm.model.Ug_unitig_0.1306, evm.model.Ug_unitig_0.1661, evm.model.Ug_unitig_0.1663, evm.model.Ug_unitig_0.815, evm.model.Ug_unitig_21.205, evm.model.Ug_unitig_21.369, evm.model.Ug_unitig_21.371, evm.model.Ug_unitig_22.533, evm.model.Ug_unitig_22.534, evm.model.Ug_unitig_26.1242, evm.model.Ug_unitig_26.1243, evm.mo…
GO:0005829	CC	p	1.45e-05	87	3.86873	4	41/880	1782/17760	cytosol	3.71e-06	41	evm.model.Ug_unitig_0.109, evm.model.Ug_unitig_0.1966, evm.model.Ug_unitig_0.609, evm.model.Ug_unitig_0.610, evm.model.Ug_unitig_0.656, evm.model.Ug_unitig_0.657, evm.model.Ug_unitig_21.326, evm.model.Ug_unitig_21.669, evm.model.Ug_unitig_22.593, evm.model.Ug_unitig_22.598, evm.model.Ug_unitig_31.5, evm.model.Ug_unitig_32.712, evm.model.Ug_unitig_37.153, evm.model.Ug_unitig_37.154, evm.model.Ug_u…
GO:0009507	CC	p	1.45e-05	49	3.78018	6	44/880	1947/17760	chloroplast	4.01e-06	44	evm.model.Ug_unitig_0.1101, evm.model.Ug_unitig_0.1102, evm.model.Ug_unitig_0.1306, evm.model.Ug_unitig_0.1661, evm.model.Ug_unitig_0.1663, evm.model.Ug_unitig_0.815, evm.model.Ug_unitig_21.205, evm.model.Ug_unitig_21.369, evm.model.Ug_unitig_21.371, evm.model.Ug_unitig_22.533, evm.model.Ug_unitig_22.534, evm.model.Ug_unitig_26.1242, evm.model.Ug_unitig_26.1243, evm.model.Ug_unitig_26.1244, evm.m…
GO:0044424	CC	p	1.48e-05	2384	2.42122	2	186/880	7578/17760	intracellular part	6.28e-06	186	evm.model.Ug_unitig_0.109, evm.model.Ug_unitig_0.1101, evm.model.Ug_unitig_0.1102, evm.model.Ug_unitig_0.1131, evm.model.Ug_unitig_0.1135, evm.model.Ug_unitig_0.123, evm.model.Ug_unitig_0.1251, evm.model.Ug_unitig_0.1306, evm.model.Ug_unitig_0.1311, evm.model.Ug_unitig_0.1661, evm.model.Ug_unitig_0.1662, evm.model.Ug_unitig_0.1663, evm.model.Ug_unitig_0.1966, evm.model.Ug_unitig_0.2056, evm.model…
GO:0043226	CC	p	1.48e-05	1957	2.86235	1	113/880	4875/17760	organelle	5.58e-06	113	evm.model.Ug_unitig_0.109, evm.model.Ug_unitig_0.1101, evm.model.Ug_unitig_0.1102, evm.model.Ug_unitig_0.1131, evm.model.Ug_unitig_0.1251, evm.model.Ug_unitig_0.1306, evm.model.Ug_unitig_0.1311, evm.model.Ug_unitig_0.1661, evm.model.Ug_unitig_0.1663, evm.model.Ug_unitig_0.2056, evm.model.Ug_unitig_0.2057, evm.model.Ug_unitig_0.2457, evm.model.Ug_unitig_0.408, evm.model.Ug_unitig_0.747, evm.model.…
GO:0043229	CC	p	1.48e-05	1784	2.86235	3	113/880	4875/17760	intracellular organelle	5.58e-06	113	evm.model.Ug_unitig_0.109, evm.model.Ug_unitig_0.1101, evm.model.Ug_unitig_0.1102, evm.model.Ug_unitig_0.1131, evm.model.Ug_unitig_0.1251, evm.model.Ug_unitig_0.1306, evm.model.Ug_unitig_0.1311, evm.model.Ug_unitig_0.1661, evm.model.Ug_unitig_0.1663, evm.model.Ug_unitig_0.2056, evm.model.Ug_unitig_0.2057, evm.model.Ug_unitig_0.2457, evm.model.Ug_unitig_0.408, evm.model.Ug_unitig_0.747, evm.model.…
GO:0043227	CC	p	1.48e-05	1367	3.06218	2	101/880	3992/17760	membrane-bounded organelle	4.96e-06	101	evm.model.Ug_unitig_0.1101, evm.model.Ug_unitig_0.1102, evm.model.Ug_unitig_0.1251, evm.model.Ug_unitig_0.1306, evm.model.Ug_unitig_0.1661, evm.model.Ug_unitig_0.1663, evm.model.Ug_unitig_0.2056, evm.model.Ug_unitig_0.2057, evm.model.Ug_unitig_0.408, evm.model.Ug_unitig_0.747, evm.model.Ug_unitig_0.815, evm.model.Ug_unitig_21.162, evm.model.Ug_unitig_21.163, evm.model.Ug_unitig_21.167, evm.model.…
GO:0043231	CC	p	1.48e-05	1050	3.08523	4	100/880	3901/17760	intracellular membrane-bounded organelle	5.05e-06	100	evm.model.Ug_unitig_0.1101, evm.model.Ug_unitig_0.1102, evm.model.Ug_unitig_0.1251, evm.model.Ug_unitig_0.1306, evm.model.Ug_unitig_0.1661, evm.model.Ug_unitig_0.1663, evm.model.Ug_unitig_0.2056, evm.model.Ug_unitig_0.2057, evm.model.Ug_unitig_0.408, evm.model.Ug_unitig_0.815, evm.model.Ug_unitig_21.162, evm.model.Ug_unitig_21.163, evm.model.Ug_unitig_21.167, evm.model.Ug_unitig_21.168, evm.model…
GO:0044444	CC	p	1.48e-05	1270	2.80398	3	135/880	5168/17760	cytoplasmic part	5.67e-06	135	evm.model.Ug_unitig_0.109, evm.model.Ug_unitig_0.1101, evm.model.Ug_unitig_0.1102, evm.model.Ug_unitig_0.1131, evm.model.Ug_unitig_0.1251, evm.model.Ug_unitig_0.1306, evm.model.Ug_unitig_0.1311, evm.model.Ug_unitig_0.1661, evm.model.Ug_unitig_0.1663, evm.model.Ug_unitig_0.1966, evm.model.Ug_unitig_0.2056, evm.model.Ug_unitig_0.2057, evm.model.Ug_unitig_0.408, evm.model.Ug_unitig_0.609, evm.model.…
GO:0003824	MF	e	2.72e-05	7519	2.26795	1	529/880	8747/17760	catalytic activity	6.70e-06	529	evm.model.Ug_unitig_0.1170, evm.model.Ug_unitig_0.1171, evm.model.Ug_unitig_0.1172, evm.model.Ug_unitig_0.1175, evm.model.Ug_unitig_0.1208, evm.model.Ug_unitig_0.121, evm.model.Ug_unitig_0.123, evm.model.Ug_unitig_0.1250, evm.model.Ug_unitig_0.1251, evm.model.Ug_unitig_0.1306, evm.model.Ug_unitig_0.1307, evm.model.Ug_unitig_0.1308, evm.model.Ug_unitig_0.1310, evm.model.Ug_unitig_0.1405, evm.model…
GO:0005488	MF	p	2.72e-05	1903	2.10141	1	430/880	10332/17760	binding	6.99e-06	430	evm.model.Ug_unitig_0.1112, evm.model.Ug_unitig_0.1113, evm.model.Ug_unitig_0.1114, evm.model.Ug_unitig_0.1170, evm.model.Ug_unitig_0.1171, evm.model.Ug_unitig_0.1172, evm.model.Ug_unitig_0.1206, evm.model.Ug_unitig_0.121, evm.model.Ug_unitig_0.123, evm.model.Ug_unitig_0.1240, evm.model.Ug_unitig_0.1306, evm.model.Ug_unitig_0.1307, evm.model.Ug_unitig_0.1308, evm.model.Ug_unitig_0.1310, evm.model…
GO:0097159	MF	p	2.72e-05	493	2.64473	2	200/880	6001/17760	organic cyclic compound binding	5.63e-06	200	evm.model.Ug_unitig_0.1170, evm.model.Ug_unitig_0.1171, evm.model.Ug_unitig_0.1172, evm.model.Ug_unitig_0.1206, evm.model.Ug_unitig_0.123, evm.model.Ug_unitig_0.1865, evm.model.Ug_unitig_0.1929, evm.model.Ug_unitig_0.1966, evm.model.Ug_unitig_0.2056, evm.model.Ug_unitig_0.2057, evm.model.Ug_unitig_0.2457, evm.model.Ug_unitig_0.2501, evm.model.Ug_unitig_0.745, evm.model.Ug_unitig_0.748, evm.model.…
GO:1901363	MF	p	2.72e-05	452	2.64473	2	200/880	6001/17760	heterocyclic compound binding	5.63e-06	200	evm.model.Ug_unitig_0.1170, evm.model.Ug_unitig_0.1171, evm.model.Ug_unitig_0.1172, evm.model.Ug_unitig_0.1206, evm.model.Ug_unitig_0.123, evm.model.Ug_unitig_0.1865, evm.model.Ug_unitig_0.1929, evm.model.Ug_unitig_0.1966, evm.model.Ug_unitig_0.2056, evm.model.Ug_unitig_0.2057, evm.model.Ug_unitig_0.2457, evm.model.Ug_unitig_0.2501, evm.model.Ug_unitig_0.745, evm.model.Ug_unitig_0.748, evm.model.…
GO:0005515	MF	p	2.72e-05	969	2.9546	2	154/880	4402/17760	protein binding	4.75e-06	154	evm.model.Ug_unitig_0.1112, evm.model.Ug_unitig_0.1113, evm.model.Ug_unitig_0.1114, evm.model.Ug_unitig_0.1170, evm.model.Ug_unitig_0.1171, evm.model.Ug_unitig_0.1172, evm.model.Ug_unitig_0.1206, evm.model.Ug_unitig_0.1240, evm.model.Ug_unitig_0.1661, evm.model.Ug_unitig_0.1662, evm.model.Ug_unitig_0.1663, evm.model.Ug_unitig_0.1865, evm.model.Ug_unitig_0.2086, evm.model.Ug_unitig_0.2087, evm.mod…
GO:0003676	MF	p	2.72e-05	328	3.08988	3	94/880	3845/17760	nucleic acid binding	4.49e-06	94	evm.model.Ug_unitig_0.1206, evm.model.Ug_unitig_0.1966, evm.model.Ug_unitig_0.745, evm.model.Ug_unitig_0.748, evm.model.Ug_unitig_0.750, evm.model.Ug_unitig_0.950, evm.model.Ug_unitig_0.951, evm.model.Ug_unitig_0.953, evm.model.Ug_unitig_0.955, evm.model.Ug_unitig_172.13, evm.model.Ug_unitig_172.4, evm.model.Ug_unitig_21.369, evm.model.Ug_unitig_21.371, evm.model.Ug_unitig_22.1110, evm.model.Ug_u…
GO:0003723	MF	p	2.72e-05	171	4.05071	4	39/880	1471/17760	RNA binding	7.48e-06	39	evm.model.Ug_unitig_0.950, evm.model.Ug_unitig_0.951, evm.model.Ug_unitig_0.953, evm.model.Ug_unitig_0.955, evm.model.Ug_unitig_21.369, evm.model.Ug_unitig_21.371, evm.model.Ug_unitig_22.60, evm.model.Ug_unitig_22.68, evm.model.Ug_unitig_26.1434, evm.model.Ug_unitig_26.39, evm.model.Ug_unitig_26.770, evm.model.Ug_unitig_32.307, evm.model.Ug_unitig_32.521, evm.model.Ug_unitig_32.537, evm.model.Ug_…
GO:0003677	MF	p	2.72e-05	146	3.68618	4	51/880	2118/17760	DNA binding	3.14e-06	51	evm.model.Ug_unitig_0.1206, evm.model.Ug_unitig_0.1966, evm.model.Ug_unitig_0.745, evm.model.Ug_unitig_0.748, evm.model.Ug_unitig_0.750, evm.model.Ug_unitig_21.369, evm.model.Ug_unitig_22.1110, evm.model.Ug_unitig_22.407, evm.model.Ug_unitig_22.409, evm.model.Ug_unitig_22.410, evm.model.Ug_unitig_22.49, evm.model.Ug_unitig_26.1189, evm.model.Ug_unitig_26.603, evm.model.Ug_unitig_27.208, evm.model…
GO:0005198	MF	p	2.72e-05	42	5.10414	1	4/880	513/17760	structural molecule activity	2.27e-06	4	evm.model.Ug_unitig_0.1131, evm.model.Ug_unitig_0.1311, evm.model.Ug_unitig_37.334, evm.model.Ug_unitig_749.515
GO:0140110	MF	p	2.72e-05	29	3.93286	1	40/880	1655/17760	transcription regulator activity	3.10e-06	40	evm.model.Ug_unitig_0.1206, evm.model.Ug_unitig_0.1966, evm.model.Ug_unitig_0.438, evm.model.Ug_unitig_0.439, evm.model.Ug_unitig_0.745, evm.model.Ug_unitig_0.748, evm.model.Ug_unitig_0.750, evm.model.Ug_unitig_22.1110, evm.model.Ug_unitig_22.407, evm.model.Ug_unitig_22.409, evm.model.Ug_unitig_22.410, evm.model.Ug_unitig_27.208, evm.model.Ug_unitig_32.185, evm.model.Ug_unitig_32.989, evm.model.U…
GO:0003700	MF	p	2.72e-05	8	4.01466	2	39/880	1525/17760	DNA-binding transcription factor activity	4.44e-06	39	evm.model.Ug_unitig_0.1206, evm.model.Ug_unitig_0.1966, evm.model.Ug_unitig_0.438, evm.model.Ug_unitig_0.439, evm.model.Ug_unitig_0.745, evm.model.Ug_unitig_0.748, evm.model.Ug_unitig_0.750, evm.model.Ug_unitig_22.1110, evm.model.Ug_unitig_22.407, evm.model.Ug_unitig_22.409, evm.model.Ug_unitig_22.410, evm.model.Ug_unitig_27.208, evm.model.Ug_unitig_32.185, evm.model.Ug_unitig_32.989, evm.model.U…
GO:0009058	BP	p	3.92e-05	3649	3.64462	2	182/880	4931/17760	biosynthetic process	7.21e-06	182	evm.model.Ug_unitig_0.1131, evm.model.Ug_unitig_0.1201, evm.model.Ug_unitig_0.1202, evm.model.Ug_unitig_0.1206, evm.model.Ug_unitig_0.1306, evm.model.Ug_unitig_0.1311, evm.model.Ug_unitig_0.1406, evm.model.Ug_unitig_0.1966, evm.model.Ug_unitig_0.2501, evm.model.Ug_unitig_0.341, evm.model.Ug_unitig_0.438, evm.model.Ug_unitig_0.439, evm.model.Ug_unitig_0.745, evm.model.Ug_unitig_0.748, evm.model.Ug…
GO:0016043	BP	p	3.92e-05	3363	4.19144	2	63/880	2854/17760	cellular component organization	4.65e-06	63	evm.model.Ug_unitig_0.1101, evm.model.Ug_unitig_0.1102, evm.model.Ug_unitig_0.1208, evm.model.Ug_unitig_0.2056, evm.model.Ug_unitig_0.2057, evm.model.Ug_unitig_0.950, evm.model.Ug_unitig_0.951, evm.model.Ug_unitig_0.953, evm.model.Ug_unitig_0.955, evm.model.Ug_unitig_21.369, evm.model.Ug_unitig_21.371, evm.model.Ug_unitig_22.1150, evm.model.Ug_unitig_22.1151, evm.model.Ug_unitig_22.1288, evm.mode…
GO:0006139	BP	p	3.92e-05	2463	3.84714	4	85/880	4027/17760	nucleobase-containing compound metabolic process	4.33e-06	85	evm.model.Ug_unitig_0.1201, evm.model.Ug_unitig_0.1202, evm.model.Ug_unitig_0.1206, evm.model.Ug_unitig_0.1966, evm.model.Ug_unitig_0.2501, evm.model.Ug_unitig_0.438, evm.model.Ug_unitig_0.439, evm.model.Ug_unitig_0.745, evm.model.Ug_unitig_0.748, evm.model.Ug_unitig_0.750, evm.model.Ug_unitig_21.326, evm.model.Ug_unitig_21.369, evm.model.Ug_unitig_21.371, evm.model.Ug_unitig_22.1110, evm.model.U…
GO:0006629	BP	e	3.92e-05	953	5.32899	3	77/880	915/17760	lipid metabolic process	6.98e-06	77	evm.model.Ug_unitig_0.1250, evm.model.Ug_unitig_0.1251, evm.model.Ug_unitig_0.1306, evm.model.Ug_unitig_0.1307, evm.model.Ug_unitig_0.1308, evm.model.Ug_unitig_0.1861, evm.model.Ug_unitig_0.1865, evm.model.Ug_unitig_0.656, evm.model.Ug_unitig_0.657, evm.model.Ug_unitig_22.487, evm.model.Ug_unitig_22.488, evm.model.Ug_unitig_22.549, evm.model.Ug_unitig_22.550, evm.model.Ug_unitig_26.872, evm.model…
GO:0009790	BP	p	3.92e-05	649	6.07027	4	1/880	436/17760	embryo development	1.56e-06	1	evm.model.Ug_unitig_21.369
GO:0065009	BP	p	6.27e-05	1022	6.48843	2	1/880	287/17760	regulation of molecular function	1.28e-05	1	evm.model.Ug_unitig_8.588
GO:0008219	BP	e	6.27e-05	508	6.5532	2	31/880	269/17760	cell death	1.22e-05	31	evm.model.Ug_unitig_37.611, evm.model.Ug_unitig_37.612, evm.model.Ug_unitig_43.7, evm.model.Ug_unitig_46.281, evm.model.Ug_unitig_50.2, evm.model.Ug_unitig_50.3, evm.model.Ug_unitig_50.4, evm.model.Ug_unitig_50.5, evm.model.Ug_unitig_52.791, evm.model.Ug_unitig_578.263, evm.model.Ug_unitig_578.568, evm.model.Ug_unitig_578.569, evm.model.Ug_unitig_578.571, evm.model.Ug_unitig_578.665, evm.model.Ug…
GO:0007049	BP	p	8.30e-05	937	5.66787	2	11/880	652/17760	cell cycle	1.86e-05	11	evm.model.Ug_unitig_26.949, evm.model.Ug_unitig_27.396, evm.model.Ug_unitig_27.398, evm.model.Ug_unitig_29.11, evm.model.Ug_unitig_29.8, evm.model.Ug_unitig_32.518, evm.model.Ug_unitig_32.521, evm.model.Ug_unitig_37.209, evm.model.Ug_unitig_37.212, evm.model.Ug_unitig_8.360, evm.model.Ug_unitig_88.118
GO:1901576	BP	p	1.54e-04	3492	5.78489	3	10/880	580/17760	organic substance biosynthetic process	5.67e-05	10	evm.model.Ug_unitig_0.1131, evm.model.Ug_unitig_0.1311, evm.model.Ug_unitig_21.371, evm.model.Ug_unitig_37.334, evm.model.Ug_unitig_46.301, evm.model.Ug_unitig_736.389, evm.model.Ug_unitig_736.390, evm.model.Ug_unitig_749.515, evm.model.Ug_unitig_899.146, evm.model.Ug_unitig_899.147
GO:0044249	BP	p	1.54e-04	3264	5.78489	3	10/880	580/17760	cellular biosynthetic process	5.67e-05	10	evm.model.Ug_unitig_0.1131, evm.model.Ug_unitig_0.1311, evm.model.Ug_unitig_21.371, evm.model.Ug_unitig_37.334, evm.model.Ug_unitig_46.301, evm.model.Ug_unitig_736.389, evm.model.Ug_unitig_736.390, evm.model.Ug_unitig_749.515, evm.model.Ug_unitig_899.146, evm.model.Ug_unitig_899.147
GO:0044271	BP	p	1.54e-04	1683	5.78489	4	10/880	580/17760	cellular nitrogen compound biosynthetic process	5.67e-05	10	evm.model.Ug_unitig_0.1131, evm.model.Ug_unitig_0.1311, evm.model.Ug_unitig_21.371, evm.model.Ug_unitig_37.334, evm.model.Ug_unitig_46.301, evm.model.Ug_unitig_736.389, evm.model.Ug_unitig_736.390, evm.model.Ug_unitig_749.515, evm.model.Ug_unitig_899.146, evm.model.Ug_unitig_899.147
GO:0009059	BP	p	1.54e-04	1567	5.78489	4	10/880	580/17760	macromolecule biosynthetic process	5.67e-05	10	evm.model.Ug_unitig_0.1131, evm.model.Ug_unitig_0.1311, evm.model.Ug_unitig_21.371, evm.model.Ug_unitig_37.334, evm.model.Ug_unitig_46.301, evm.model.Ug_unitig_736.389, evm.model.Ug_unitig_736.390, evm.model.Ug_unitig_749.515, evm.model.Ug_unitig_899.146, evm.model.Ug_unitig_899.147
GO:1901566	BP	p	1.54e-04	1344	5.78489	4	10/880	580/17760	organonitrogen compound biosynthetic process	5.67e-05	10	evm.model.Ug_unitig_0.1131, evm.model.Ug_unitig_0.1311, evm.model.Ug_unitig_21.371, evm.model.Ug_unitig_37.334, evm.model.Ug_unitig_46.301, evm.model.Ug_unitig_736.389, evm.model.Ug_unitig_736.390, evm.model.Ug_unitig_749.515, evm.model.Ug_unitig_899.146, evm.model.Ug_unitig_899.147
GO:0034645	BP	p	1.54e-04	1256	5.78489	5	10/880	580/17760	cellular macromolecule biosynthetic process	5.67e-05	10	evm.model.Ug_unitig_0.1131, evm.model.Ug_unitig_0.1311, evm.model.Ug_unitig_21.371, evm.model.Ug_unitig_37.334, evm.model.Ug_unitig_46.301, evm.model.Ug_unitig_736.389, evm.model.Ug_unitig_736.390, evm.model.Ug_unitig_749.515, evm.model.Ug_unitig_899.146, evm.model.Ug_unitig_899.147
GO:0043604	BP	p	1.54e-04	389	5.78489	5	10/880	580/17760	amide biosynthetic process	5.67e-05	10	evm.model.Ug_unitig_0.1131, evm.model.Ug_unitig_0.1311, evm.model.Ug_unitig_21.371, evm.model.Ug_unitig_37.334, evm.model.Ug_unitig_46.301, evm.model.Ug_unitig_736.389, evm.model.Ug_unitig_736.390, evm.model.Ug_unitig_749.515, evm.model.Ug_unitig_899.146, evm.model.Ug_unitig_899.147
GO:0043043	BP	p	1.54e-04	292	5.78489	6	10/880	580/17760	peptide biosynthetic process	5.67e-05	10	evm.model.Ug_unitig_0.1131, evm.model.Ug_unitig_0.1311, evm.model.Ug_unitig_21.371, evm.model.Ug_unitig_37.334, evm.model.Ug_unitig_46.301, evm.model.Ug_unitig_736.389, evm.model.Ug_unitig_736.390, evm.model.Ug_unitig_749.515, evm.model.Ug_unitig_899.146, evm.model.Ug_unitig_899.147
GO:0005794	CC	p	9.20e-04	45	5.15371	5	9/880	493/17760	Golgi apparatus	4.50e-04	9	evm.model.Ug_unitig_0.408, evm.model.Ug_unitig_21.162, evm.model.Ug_unitig_21.163, evm.model.Ug_unitig_21.167, evm.model.Ug_unitig_21.168, evm.model.Ug_unitig_37.209, evm.model.Ug_unitig_37.212, evm.model.Ug_unitig_899.899, evm.model.Ug_unitig_899.900
GO:0005764	CC	e	1.03e-03	35	6.9722	7	12/880	80/17760	lysosome	5.47e-04	12	evm.model.Ug_unitig_37.666, evm.model.Ug_unitig_37.667, evm.model.Ug_unitig_578.660, evm.model.Ug_unitig_578.665, evm.model.Ug_unitig_699.299, evm.model.Ug_unitig_699.300, evm.model.Ug_unitig_699.301, evm.model.Ug_unitig_699.310, evm.model.Ug_unitig_699.312, evm.model.Ug_unitig_85.134, evm.model.Ug_unitig_85.135, evm.model.Ug_unitig_85.137
GO:0031982	CC	p	1.37e-03	306	6.04102	3	1/880	203/17760	vesicle	8.46e-04	1	evm.model.Ug_unitig_0.747
GO:0097708	CC	p	1.37e-03	293	6.04102	4	1/880	203/17760	intracellular vesicle	8.46e-04	1	evm.model.Ug_unitig_0.747
GO:0009607	BP	e	1.41e-03	859	5.27475	2	72/880	966/17760	response to biotic stimulus	5.61e-04	72	evm.model.Ug_unitig_0.1101, evm.model.Ug_unitig_0.1102, evm.model.Ug_unitig_0.2123, evm.model.Ug_unitig_0.2124, evm.model.Ug_unitig_0.2126, evm.model.Ug_unitig_0.2128, evm.model.Ug_unitig_0.2129, evm.model.Ug_unitig_0.609, evm.model.Ug_unitig_0.610, evm.model.Ug_unitig_0.815, evm.model.Ug_unitig_21.14, evm.model.Ug_unitig_21.15, evm.model.Ug_unitig_21.162, evm.model.Ug_unitig_21.163, evm.model.Ug…
GO:0065007	BP	p	1.49e-03	13140	4.42347	1	80/880	2263/17760	biological regulation	6.09e-04	80	evm.model.Ug_unitig_0.109, evm.model.Ug_unitig_0.123, evm.model.Ug_unitig_22.1173, evm.model.Ug_unitig_27.208, evm.model.Ug_unitig_27.555, evm.model.Ug_unitig_28.8, evm.model.Ug_unitig_32.1034, evm.model.Ug_unitig_32.185, evm.model.Ug_unitig_32.817, evm.model.Ug_unitig_32.818, evm.model.Ug_unitig_37.257, evm.model.Ug_unitig_37.333, evm.model.Ug_unitig_37.334, evm.model.Ug_unitig_37.335, evm.model…
GO:0005215	MF	e	1.72e-03	1056	4.26607	1	85/880	1186/17760	transporter activity	5.17e-04	85	evm.model.Ug_unitig_0.2524, evm.model.Ug_unitig_0.2525, evm.model.Ug_unitig_21.162, evm.model.Ug_unitig_21.163, evm.model.Ug_unitig_21.167, evm.model.Ug_unitig_21.168, evm.model.Ug_unitig_21.485, evm.model.Ug_unitig_21.487, evm.model.Ug_unitig_21.688, evm.model.Ug_unitig_21.689, evm.model.Ug_unitig_21.690, evm.model.Ug_unitig_21.774, evm.model.Ug_unitig_21.775, evm.model.Ug_unitig_22.1620, evm.mo…
GO:0009791	BP	p	3.65e-03	381	4.82937	2	50/880	1508/17760	post-embryonic development	1.53e-03	50	evm.model.Ug_unitig_0.109, evm.model.Ug_unitig_0.1201, evm.model.Ug_unitig_0.1865, evm.model.Ug_unitig_0.2524, evm.model.Ug_unitig_0.609, evm.model.Ug_unitig_0.610, evm.model.Ug_unitig_0.950, evm.model.Ug_unitig_0.951, evm.model.Ug_unitig_0.953, evm.model.Ug_unitig_0.955, evm.model.Ug_unitig_21.369, evm.model.Ug_unitig_21.371, evm.model.Ug_unitig_21.688, evm.model.Ug_unitig_21.689, evm.model.Ug_u…
GO:0031967	CC	p	4.42e-03	137	6.54204	4	0/880	123/17760	organelle envelope	3.01e-03	0
GO:0005635	CC	p	4.42e-03	30	6.54204	5	0/880	123/17760	nuclear envelope	3.01e-03	0
GO:0005575	CC	p	4.75e-03	4212	1.91182	0	586/880	12612/17760	cellular_component	3.33e-03	586	evm.model.Ug_unitig_0.109, evm.model.Ug_unitig_0.1101, evm.model.Ug_unitig_0.1102, evm.model.Ug_unitig_0.1131, evm.model.Ug_unitig_0.1135, evm.model.Ug_unitig_0.1208, evm.model.Ug_unitig_0.121, evm.model.Ug_unitig_0.123, evm.model.Ug_unitig_0.1251, evm.model.Ug_unitig_0.1306, evm.model.Ug_unitig_0.1307, evm.model.Ug_unitig_0.1308, evm.model.Ug_unitig_0.1310, evm.model.Ug_unitig_0.1311, evm.model.…
GO:0032991	CC	p	5.84e-03	2121	5.54909	1	6/880	332/17760	protein-containing complex	4.59e-03	6	evm.model.Ug_unitig_0.1131, evm.model.Ug_unitig_0.1311, evm.model.Ug_unitig_37.334, evm.model.Ug_unitig_578.577, evm.model.Ug_unitig_8.219, evm.model.Ug_unitig_8.220
GO:1990904	CC	p	5.84e-03	127	5.54909	2	6/880	332/17760	ribonucleoprotein complex	4.59e-03	6	evm.model.Ug_unitig_0.1131, evm.model.Ug_unitig_0.1311, evm.model.Ug_unitig_37.334, evm.model.Ug_unitig_578.577, evm.model.Ug_unitig_8.219, evm.model.Ug_unitig_8.220
GO:0005840	CC	p	5.84e-03	19	5.54909	5	6/880	332/17760	ribosome	4.59e-03	6	evm.model.Ug_unitig_0.1131, evm.model.Ug_unitig_0.1311, evm.model.Ug_unitig_37.334, evm.model.Ug_unitig_578.577, evm.model.Ug_unitig_8.219, evm.model.Ug_unitig_8.220
GO:0003682	MF	p	1.10e-02	8	6.22045	2	1/880	168/17760	chromatin binding	3.57e-03	1	evm.model.Ug_unitig_37.374
GO:0007275	BP	p	1.29e-02	5274	5.01143	3	42/880	1257/17760	multicellular organism development	5.57e-03	42	evm.model.Ug_unitig_0.1966, evm.model.Ug_unitig_0.2056, evm.model.Ug_unitig_0.2057, evm.model.Ug_unitig_0.2123, evm.model.Ug_unitig_0.2124, evm.model.Ug_unitig_0.2126, evm.model.Ug_unitig_0.2128, evm.model.Ug_unitig_0.2129, evm.model.Ug_unitig_21.369, evm.model.Ug_unitig_26.1474, evm.model.Ug_unitig_26.1475, evm.model.Ug_unitig_27.400, evm.model.Ug_unitig_29.10, evm.model.Ug_unitig_32.518, evm.mo…
GO:0005618	CC	e	1.32e-02	45	5.51358	3	28/880	344/17760	cell wall	1.12e-02	28	evm.model.Ug_unitig_0.815, evm.model.Ug_unitig_22.1150, evm.model.Ug_unitig_22.1151, evm.model.Ug_unitig_22.593, evm.model.Ug_unitig_22.598, evm.model.Ug_unitig_26.1434, evm.model.Ug_unitig_32.515, evm.model.Ug_unitig_32.517, evm.model.Ug_unitig_32.519, evm.model.Ug_unitig_32.522, evm.model.Ug_unitig_37.666, evm.model.Ug_unitig_37.667, evm.model.Ug_unitig_46.638, evm.model.Ug_unitig_52.529, evm.m…
GO:0032501	BP	p	1.34e-02	7576	4.37558	1	91/880	2374/17760	multicellular organismal process	6.04e-03	91	evm.model.Ug_unitig_0.109, evm.model.Ug_unitig_0.1201, evm.model.Ug_unitig_0.1865, evm.model.Ug_unitig_0.1966, evm.model.Ug_unitig_0.2056, evm.model.Ug_unitig_0.2057, evm.model.Ug_unitig_0.2123, evm.model.Ug_unitig_0.2124, evm.model.Ug_unitig_0.2126, evm.model.Ug_unitig_0.2128, evm.model.Ug_unitig_0.2129, evm.model.Ug_unitig_0.2524, evm.model.Ug_unitig_0.609, evm.model.Ug_unitig_0.610, evm.model.…
GO:0006091	BP	p	1.82e-02	225	6.03202	3	11/880	453/17760	generation of precursor metabolites and energy	8.34e-03	11	evm.model.Ug_unitig_21.205, evm.model.Ug_unitig_26.1242, evm.model.Ug_unitig_26.1243, evm.model.Ug_unitig_26.1244, evm.model.Ug_unitig_26.1245, evm.model.Ug_unitig_26.1246, evm.model.Ug_unitig_61.287, evm.model.Ug_unitig_61.288, evm.model.Ug_unitig_699.332, evm.model.Ug_unitig_748.1179, evm.model.Ug_unitig_748.1364
GO:0008289	MF	e	1.95e-02	96	5.73494	2	24/880	273/17760	lipid binding	6.81e-03	24	evm.model.Ug_unitig_0.747, evm.model.Ug_unitig_0.749, evm.model.Ug_unitig_22.1173, evm.model.Ug_unitig_22.1279, evm.model.Ug_unitig_22.1280, evm.model.Ug_unitig_22.1281, evm.model.Ug_unitig_22.1282, evm.model.Ug_unitig_22.1288, evm.model.Ug_unitig_22.1289, evm.model.Ug_unitig_26.39, evm.model.Ug_unitig_26.40, evm.model.Ug_unitig_27.398, evm.model.Ug_unitig_27.400, evm.model.Ug_unitig_29.10, evm.m…
GO:0008150	BP	p	2.64e-02	29700	2.6131	0	655/880	13833/17760	biological_process	1.24e-02	655	evm.model.Ug_unitig_0.109, evm.model.Ug_unitig_0.1101, evm.model.Ug_unitig_0.1102, evm.model.Ug_unitig_0.1112, evm.model.Ug_unitig_0.1113, evm.model.Ug_unitig_0.1114, evm.model.Ug_unitig_0.1131, evm.model.Ug_unitig_0.1170, evm.model.Ug_unitig_0.1171, evm.model.Ug_unitig_0.1172, evm.model.Ug_unitig_0.1201, evm.model.Ug_unitig_0.1202, evm.model.Ug_unitig_0.1206, evm.model.Ug_unitig_0.1208, evm.mode…
GO:0000003	BP	p	2.91e-02	1302	5.35445	1	29/880	892/17760	reproduction	1.40e-02	29	evm.model.Ug_unitig_0.1865, evm.model.Ug_unitig_0.2524, evm.model.Ug_unitig_0.609, evm.model.Ug_unitig_0.610, evm.model.Ug_unitig_0.950, evm.model.Ug_unitig_0.951, evm.model.Ug_unitig_0.953, evm.model.Ug_unitig_0.955, evm.model.Ug_unitig_21.369, evm.model.Ug_unitig_22.1288, evm.model.Ug_unitig_22.1289, evm.model.Ug_unitig_26.949, evm.model.Ug_unitig_27.173, evm.model.Ug_unitig_27.175, evm.model.U…
GO:0009314	BP	p	3.11e-02	134	5.60833	3	21/880	692/17760	response to radiation	1.55e-02	21	evm.model.Ug_unitig_0.609, evm.model.Ug_unitig_0.610, evm.model.Ug_unitig_26.1242, evm.model.Ug_unitig_26.1243, evm.model.Ug_unitig_26.1245, evm.model.Ug_unitig_26.1246, evm.model.Ug_unitig_27.259, evm.model.Ug_unitig_27.260, evm.model.Ug_unitig_27.400, evm.model.Ug_unitig_29.10, evm.model.Ug_unitig_46.407, evm.model.Ug_unitig_46.409, evm.model.Ug_unitig_46.410, evm.model.Ug_unitig_699.332, evm.m…
GO:0009416	BP	p	3.11e-02	117	5.60833	4	21/880	692/17760	response to light stimulus	1.55e-02	21	evm.model.Ug_unitig_0.609, evm.model.Ug_unitig_0.610, evm.model.Ug_unitig_26.1242, evm.model.Ug_unitig_26.1243, evm.model.Ug_unitig_26.1245, evm.model.Ug_unitig_26.1246, evm.model.Ug_unitig_27.259, evm.model.Ug_unitig_27.260, evm.model.Ug_unitig_27.400, evm.model.Ug_unitig_29.10, evm.model.Ug_unitig_46.407, evm.model.Ug_unitig_46.409, evm.model.Ug_unitig_46.410, evm.model.Ug_unitig_699.332, evm.m…
GO:0032502	BP	p	3.37e-02	6491	4.36719	1	95/880	2394/17760	developmental process	1.72e-02	95	evm.model.Ug_unitig_0.1966, evm.model.Ug_unitig_0.2056, evm.model.Ug_unitig_0.2057, evm.model.Ug_unitig_0.2123, evm.model.Ug_unitig_0.2124, evm.model.Ug_unitig_0.2126, evm.model.Ug_unitig_0.2128, evm.model.Ug_unitig_0.2129, evm.model.Ug_unitig_0.950, evm.model.Ug_unitig_0.951, evm.model.Ug_unitig_0.953, evm.model.Ug_unitig_0.955, evm.model.Ug_unitig_21.348, evm.model.Ug_unitig_21.349, evm.model.U…
GO:0016740	MF	e	3.58e-02	2462	3.08314	2	222/880	3871/17760	transferase activity	1.34e-02	222	evm.model.Ug_unitig_0.1170, evm.model.Ug_unitig_0.1171, evm.model.Ug_unitig_0.1172, evm.model.Ug_unitig_0.1175, evm.model.Ug_unitig_0.123, evm.model.Ug_unitig_0.1861, evm.model.Ug_unitig_0.1865, evm.model.Ug_unitig_0.1929, evm.model.Ug_unitig_0.1931, evm.model.Ug_unitig_0.402, evm.model.Ug_unitig_0.403, evm.model.Ug_unitig_0.404, evm.model.Ug_unitig_0.408, evm.model.Ug_unitig_0.409, evm.model.Ug_…
GO:0048869	BP	p	3.82e-02	2573	5.52252	2	24/880	754/17760	cellular developmental process	2.03e-02	24	evm.model.Ug_unitig_0.2056, evm.model.Ug_unitig_0.2057, evm.model.Ug_unitig_0.950, evm.model.Ug_unitig_0.951, evm.model.Ug_unitig_0.953, evm.model.Ug_unitig_0.955, evm.model.Ug_unitig_22.1288, evm.model.Ug_unitig_22.1289, evm.model.Ug_unitig_26.1474, evm.model.Ug_unitig_26.1475, evm.model.Ug_unitig_26.949, evm.model.Ug_unitig_27.400, evm.model.Ug_unitig_29.10, evm.model.Ug_unitig_37.601, evm.mode…
GO:0030154	BP	p	3.82e-02	2428	5.52252	3	24/880	754/17760	cell differentiation	2.03e-02	24	evm.model.Ug_unitig_0.2056, evm.model.Ug_unitig_0.2057, evm.model.Ug_unitig_0.950, evm.model.Ug_unitig_0.951, evm.model.Ug_unitig_0.953, evm.model.Ug_unitig_0.955, evm.model.Ug_unitig_22.1288, evm.model.Ug_unitig_22.1289, evm.model.Ug_unitig_26.1474, evm.model.Ug_unitig_26.1475, evm.model.Ug_unitig_26.949, evm.model.Ug_unitig_27.400, evm.model.Ug_unitig_29.10, evm.model.Ug_unitig_37.601, evm.mode…
GO:0090304	BP	p	4.34e-02	1714	5.79877	5	17/880	572/17760	nucleic acid metabolic process	2.39e-02	17	evm.model.Ug_unitig_22.49, evm.model.Ug_unitig_22.50, evm.model.Ug_unitig_26.949, evm.model.Ug_unitig_27.396, evm.model.Ug_unitig_27.398, evm.model.Ug_unitig_29.11, evm.model.Ug_unitig_29.8, evm.model.Ug_unitig_32.518, evm.model.Ug_unitig_32.521, evm.model.Ug_unitig_37.374, evm.model.Ug_unitig_744.111, evm.model.Ug_unitig_749.433, evm.model.Ug_unitig_749.434, evm.model.Ug_unitig_82.49, evm.model.…
GO:0006259	BP	p	4.34e-02	519	5.79877	6	17/880	572/17760	DNA metabolic process	2.39e-02	17	evm.model.Ug_unitig_22.49, evm.model.Ug_unitig_22.50, evm.model.Ug_unitig_26.949, evm.model.Ug_unitig_27.396, evm.model.Ug_unitig_27.398, evm.model.Ug_unitig_29.11, evm.model.Ug_unitig_29.8, evm.model.Ug_unitig_32.518, evm.model.Ug_unitig_32.521, evm.model.Ug_unitig_37.374, evm.model.Ug_unitig_744.111, evm.model.Ug_unitig_749.433, evm.model.Ug_unitig_749.434, evm.model.Ug_unitig_82.49, evm.model.…
GO:0048856	BP	p	4.46e-02	6082	4.48733	2	84/880	2123/17760	anatomical structure development	2.50e-02	84	evm.model.Ug_unitig_0.1966, evm.model.Ug_unitig_0.2056, evm.model.Ug_unitig_0.2057, evm.model.Ug_unitig_0.2123, evm.model.Ug_unitig_0.2124, evm.model.Ug_unitig_0.2126, evm.model.Ug_unitig_0.2128, evm.model.Ug_unitig_0.2129, evm.model.Ug_unitig_21.348, evm.model.Ug_unitig_21.349, evm.model.Ug_unitig_21.369, evm.model.Ug_unitig_21.371, evm.model.Ug_unitig_22.1110, evm.model.Ug_unitig_22.407, evm.mo…

[truncated: 2 more sheets: Urenif SEGMENTAL, Ugibba SEGMENTAL]
