# Supplementary material for: The Terrestrial Carnivorous Plant Utricularia reniformis Sheds Light on Environmental and Life-Form Genome Plasticity
Source: Int J Mol Sci. 2019 Dec 18;21(1):3. doi: 10.3390/ijms21010003 (PMC6982007; doi:10.3390/ijms21010003)
Supplement: Supplementary file 1 [file ijms-21-00003-s001.zip › Supplementary_tableS15.xls]

## Sheet: Urenif SHARED with Ugibba
gene_name	length	status	product	GOterms	EC_name	NOG_class
evm.model.scaffold1000_size25310.2	282	1	Tetraspanin-6 like	GO:0005886 GO:0009506 GO:0016021	NULL	S
evm.model.scaffold1001_size25237.3	432	2	Geraniol 10-hydroxylase	GO:0036202 GO:0005506 GO:0102811 GO:0016021 GO:0016099 GO:0055114 GO:0051502 GO:0020037	Geraniol_8-hydroxylase;Acting_on_paired_donors,_with_incorporation_or_reduction_of_molecular_oxygen._The_oxygen_incorporated_need_not_be_derived_from_O(2);Acting_on_paired_donors,_with_incorporation_or_reduction_of_molecular_oxygen._The_oxygen_incorporated_need_not_be_derived_from_O(2)	Q
evm.model.scaffold1001_size25237.6	498	2	Geraniol 10-hydroxylase	GO:0036202 GO:0005506 GO:0102811 GO:0016099 GO:0055114 GO:0044425 GO:0051502 GO:0020037	Geraniol_8-hydroxylase;Acting_on_paired_donors,_with_incorporation_or_reduction_of_molecular_oxygen._The_oxygen_incorporated_need_not_be_derived_from_O(2);Acting_on_paired_donors,_with_incorporation_or_reduction_of_molecular_oxygen._The_oxygen_incorporated_need_not_be_derived_from_O(2)	Q
evm.model.scaffold1002_size25184.2	818	1	protein SMAX1-LIKE 3-like	GO:0019538	NULL	O
evm.model.scaffold1002_size25184.3	863	1	Filament-like plant protein	GO:0070481 GO:0070966 GO:0071025	NULL	S
evm.model.scaffold1002_size25184.1	437	1	Eukaryotic peptide chain release factor subunit 1-3-like	GO:0005737 GO:0003747 GO:0006415	NULL	J
evm.model.scaffold1002_size25184.5	405	3	Cysteine protease	GO:0051697 GO:0000045 GO:0044804 GO:0006508 GO:0004197 GO:0005829 GO:0006501 GO:0000422 GO:0006612	Acting_on_peptide_bonds_(peptidases)	UZ
evm.model.scaffold1002_size25184.4	495	3	Cysteine protease	GO:0051697 GO:0000045 GO:0044804 GO:0006508 GO:0004197 GO:0005829 GO:0006501 GO:0000422 GO:0006612	Acting_on_peptide_bonds_(peptidases)	UZ
evm.model.scaffold1003_size25156.3	178	1	Leucine-rich repeat-containing protein	noGO	NULL	S
evm.model.scaffold1004_size25060.3	1117	1	Ubiquitin carboxyl-terminal hydrolase 12	GO:0016579 GO:0004843 GO:0005515 GO:0009506 GO:0031647 GO:0003690 GO:0004197 GO:0005829 GO:0006265 GO:0009867 GO:0006511	Acting_on_peptide_bonds_(peptidases);Ubiquitinyl_hydrolase_1	O
evm.model.scaffold1005_size24999.2	544	1	Pectinesterase	GO:0050829 GO:0043086 GO:0046910 GO:0042545 GO:0030599	Pectinesterase;Carboxylesterase	G
evm.model.scaffold1005_size24999.1	122	1	60S acidic ribosomal protein P3-like	GO:0003735 GO:0006414 GO:0005886 GO:0042788	NULL	J
evm.model.scaffold1005_size24999.3	200	1	ethylene-responsive transcription factor ERF017	GO:0002213 GO:0051301 GO:0003677 GO:0003700 GO:0009611 GO:0006355	NULL	K
evm.model.scaffold1006_size24908.3	217	1	Putative ovule protein	GO:0016021	NULL	none
evm.model.scaffold1006_size24908.2	127	1	transmembrane protein 234 homolog	GO:0016021	NULL	S
evm.model.scaffold1006_size24908.4	1450	1	myosin-15 isoform X1	GO:0016459 GO:0033275 GO:0007097 GO:0007015 GO:0043531 GO:0042641 GO:0000146 GO:0051015 GO:0000331 GO:0030898 GO:0005524 GO:0031965 GO:2000769 GO:0140027	Adenosinetriphosphatase;Nucleoside-triphosphate_phosphatase	Z
evm.model.scaffold1007_size24833.1	138	3	DNA helicase	noGO	NULL	none
evm.model.scaffold1008_size24807.5	1471	1	Guanine nucleotide exchange factor SPIKE 1	GO:0008360 GO:0009958 GO:0016192 GO:0010928 GO:0007264 GO:0008064 GO:0005829 GO:0070971 GO:0005089 GO:0019898 GO:0005886	NULL	T
evm.model.scaffold1008_size24807.4	284	1	ER membrane protein complex subunit 10-like	noGO	NULL	S
evm.model.scaffold1008_size24807.1	99	1	two-component response regulator ARR12-like	noGO	NULL	S
evm.model.scaffold1008_size24807.3	299	1	DOG1 domain-containing protein	GO:0043565 GO:0006351	NULL	S
evm.model.scaffold1009_size24788.7	197	4	Protein-S-isoprenylcysteine O-methyltransferase	GO:0005789 GO:0006481 GO:0016021 GO:0004671 GO:0009788	Protein-S-isoprenylcysteine_O-methyltransferase	O
evm.model.scaffold1009_size24788.9	283	4	Peptide alpha-N-acetyltransferase	GO:0005515 GO:0016740	NULL	S
evm.model.scaffold1009_size24788.3	126	4	probable E3 ubiquitin-protein ligase XERICO	GO:0047484 GO:0043161 GO:0061630 GO:0009651 GO:0009789 GO:0016567	NULL	O
evm.model.scaffold1009_size24788.2	458	4	Alpha/Beta hydrolase fold containing protein	GO:0016021 GO:0008970 GO:0052739 GO:0052740	Phospholipase_A(1);Carboxylesterase	S
evm.model.scaffold1009_size24788.8	152	4	Mlp-like protein 423	GO:0016020 GO:0004864 GO:0010427 GO:0038023 GO:0006952 GO:0009738	NULL	S
evm.model.scaffold1009_size24788.6	530	4	aldehyde dehydrogenase family 2 member B7, mitochondrial-like	GO:0043878 GO:0008957 GO:0055114	Aldehyde_dehydrogenase_(NAD(+));Phenylacetaldehyde_dehydrogenase	C
evm.model.scaffold1009_size24788.5	521	4	Leucine-rich repeat-containing protein 50	noGO	NULL	S
evm.model.scaffold1009_size24788.1	386	4	Glycine--tRNA ligase beta subunit like	GO:0016021 GO:0016874	NULL	S
evm.model.scaffold1009_size24788.10	283	3	Peptide alpha-N-acetyltransferase	GO:0005515 GO:0016740	NULL	S
evm.model.scaffold100_size686073.11	120	1	serine/threonine-protein phosphatase 7 long form homolog	noGO	NULL	S
evm.model.scaffold100_size686073.167	248	1	WRKY transcription factor 55-like	GO:0003700 GO:0006355 GO:0043565	NULL	K
evm.model.scaffold100_size686073.47	168	3	ethylene-responsive transcription factor ERF106-like	GO:0003700 GO:0045893 GO:0019760 GO:1904277 GO:0000976 GO:0009414	NULL	K
evm.model.scaffold100_size686073.111	346	1	Uncharacterized protein	noGO	NULL	L
evm.model.scaffold100_size686073.191	760	1	TBC1 domain family member 2B-like	GO:0031338 GO:0090630 GO:0005096 GO:0012505 GO:0006886 GO:0017137 GO:0005622	NULL	U
evm.model.scaffold100_size686073.120	152	1	Uncharacterized protein	noGO	NULL	L
evm.model.scaffold100_size686073.23	406	4	BTB/POZ and MATH domain-containing protein 2-like	GO:0071472 GO:0042631 GO:0005515 GO:0006397	NULL	D
evm.model.scaffold100_size686073.201	225	1	glucose-induced degradation protein 8 homolog isoform X1	GO:0005737 GO:0005515	NULL	Z
evm.model.scaffold100_size686073.7	260	1	thylakoid membrane protein slr0575-like	GO:0016021	NULL	S
evm.model.scaffold100_size686073.20	177	4	U1 small nuclear ribonucleoprotein C	GO:0000243 GO:0071010 GO:0008270 GO:0000395 GO:0030627 GO:0005685 GO:0000387	NULL	A
evm.model.scaffold100_size686073.132	717	1	protein RETICULATA-RELATED 5, chloroplastic-like	GO:0015995 GO:0009507 GO:0009741	NULL	S
evm.model.scaffold100_size686073.157	174	1	Uncharacterized protein	noGO	NULL	S
evm.model.scaffold100_size686073.114	115	Singleton	30s ribosomal protein s31, chloroplastic	GO:0009570 GO:0009941 GO:0005840 GO:0032544	NULL	J
evm.model.scaffold100_size686073.118	137	1	hypothetical protein	noGO	NULL	S
evm.model.scaffold100_size686073.70	294	1	Syntaxin-112-like	GO:0006906 GO:0048278 GO:0005484 GO:0016021 GO:0012505 GO:0031201 GO:0000149 GO:0006886 GO:0006887 GO:0005886	NULL	U
evm.model.scaffold100_size686073.56	430	4	Pentatricopeptide repeat-containing protein	GO:0090305 GO:0003723 GO:0009451 GO:0004519 GO:0043231 GO:0005515	NULL	S
evm.model.scaffold100_size686073.32	692	1	Uncharacterized protein	noGO	NULL	S
evm.model.scaffold100_size686073.24	170	1	Glutathione peroxidase	GO:0009793 GO:0005829 GO:0005886 GO:0004602 GO:0006979 GO:0055114 GO:0098869	Glutathione_peroxidase;Peroxidase	O
evm.model.scaffold100_size686073.67	1210	4	Zn-finger protein	GO:0061630 GO:0008270 GO:0043161 GO:0016874 GO:0016567	NULL	O
evm.model.scaffold100_size686073.21	460	4	RNA-binding protein BRN1	GO:0080151 GO:0005737 GO:0003729 GO:0006402 GO:1990904 GO:0009626 GO:2000028	NULL	A
evm.model.scaffold100_size686073.138	194	1	Serine/threonine-protein phosphatase 7 long form-like	noGO	NULL	S
evm.model.scaffold100_size686073.115	140	1	pleckstrin homology domain-containing protein 1-like	GO:0032266	NULL	T
evm.model.scaffold100_size686073.19	300	4	Bifunctional protein FolD 2	GO:0009507 GO:0044030 GO:0005829 GO:0035999 GO:0055114 GO:0004477 GO:0004488	Methenyltetrahydrofolate_cyclohydrolase;Methylenetetrahydrofolate_dehydrogenase_(NADP(+))	H
evm.model.scaffold100_size686073.136	202	1	Serine/threonine-protein phosphatase 7 long form-like	noGO	NULL	S
evm.model.scaffold100_size686073.105	262	1	Serine/threonine-protein phosphatase 7 long form-like	noGO	NULL	S
evm.model.scaffold100_size686073.193	537	1	Putative GTP-binding protein EngB	GO:0005525 GO:0016787	NULL	D
evm.model.scaffold100_size686073.16	926	1	Rhizopine catabolism protein mocA	GO:0050112 GO:0016579 GO:0055114 GO:0006511 GO:0036459	Inositol_2-dehydrogenase;Ubiquitinyl_hydrolase_1;Alcohol_dehydrogenase	GQ
evm.model.scaffold100_size686073.179	527	Singleton	Protein PLANT CADMIUM RESISTANCE like	GO:0016021 GO:0009975 GO:0051762	NULL	S
evm.model.scaffold100_size686073.76	332	1	Uncharacterized protein	noGO	NULL	S
evm.model.scaffold100_size686073.131	852	1	probable methyltransferase PMT23	GO:0005802 GO:0016021 GO:0008757 GO:0032259	NULL	S
evm.model.scaffold100_size686073.137	171	1	hypothetical protein	noGO	NULL	S
evm.model.scaffold100_size686073.26	63	1	Uncharacterized protein	noGO	NULL	S
evm.model.scaffold100_size686073.64	90	1	hypothetical protein	noGO	NULL	S
evm.model.scaffold100_size686073.40	390	1	uncharacterized protein LOC104603216	noGO	NULL	L
evm.model.scaffold100_size686073.22	181	4	Histone-lysine N-methyltransferase	GO:0008270	NULL	S
evm.model.scaffold100_size686073.41	96	1	hypothetical protein	noGO	NULL	S
evm.model.scaffold100_size686073.171	96	1	hypothetical protein	noGO	NULL	S
evm.model.scaffold100_size686073.43	151	3	protein mago nashi homolog	GO:0008380 GO:0009507 GO:0035145 GO:0009793 GO:0010183 GO:0016607 GO:0010628 GO:0005730	NULL	A
evm.model.scaffold100_size686073.112	246	1	hypothetical protein	noGO	NULL	S
evm.model.scaffold100_size686073.29	193	1	R2R3-MYB transcriptional factor (Fragment)	noGO	NULL	S
evm.model.scaffold100_size686073.66	178	1	Zinc finger protein 6	GO:0003700 GO:0019760 GO:0044212 GO:0006355 GO:0043565 GO:0009740 GO:0009736 GO:0009788	NULL	S
evm.model.scaffold100_size686073.10	893	1	Glycerophosphodiester phosphodiesterase gdpdl4	GO:0006968 GO:0009506 GO:0005509 GO:0006629 GO:0016021 GO:0048765 GO:0008889 GO:0010442 GO:0010026 GO:0009932 GO:0046658	Glycerophosphodiester_phosphodiesterase	C
evm.model.scaffold100_size686073.119	169	1	hypothetical protein	noGO	NULL	S
evm.model.scaffold100_size686073.18	293	4	Pre-mRNA-splicing factor SF2	GO:0016607 GO:0003729 GO:0035061	NULL	A
evm.model.scaffold100_size686073.183	761	1	Enhancer of polycomb-like protein	GO:0032777 GO:0006357	NULL	K
evm.model.scaffold100_size686073.77	97	2	40S ribosomal protein S28	GO:0005737 GO:0003735 GO:0030490 GO:0000028 GO:0006412	NULL	J
evm.model.scaffold100_size686073.55	454	1	Uncharacterized protein	noGO	NULL	L
evm.model.scaffold100_size686073.155	491	Singleton	Putative hydrolase/acyltransferase (Alpha/beta hydrolase superfamily)	GO:0009941 GO:0016740	NULL	S
evm.model.scaffold100_size686073.174	105	1	hypothetical protein	noGO	NULL	S
evm.model.scaffold100_size686073.89	343	1	probable dolichyl-diphosphooligosaccharide--protein glycosyltransferase subunit 3B	GO:0004579 GO:0008250 GO:0009507 GO:0010483 GO:0016021 GO:0018279 GO:0005886 GO:0098827	Glycosyltransferases	O
evm.model.scaffold100_size686073.126	248	1	Uncharacterized protein	noGO	NULL	S
evm.model.scaffold100_size686073.162	330	1	uncharacterized protein LOC103699046	noGO	NULL	S
evm.model.scaffold100_size686073.143	514	1	suppressor of mec-8 and unc-52 protein homolog 1	GO:0005515 GO:0000381 GO:0016607 GO:0080008	NULL	S
evm.model.scaffold100_size686073.199	367	1	Uncharacterized protein	noGO	NULL	L
evm.model.scaffold100_size686073.78	280	Singleton	Proteasome assembly chaperone 2	GO:0000502	NULL	O
evm.model.scaffold100_size686073.170	265	1	hypothetical protein	noGO	NULL	S
evm.model.scaffold100_size686073.99	133	1	hypothetical protein	noGO	NULL	S
evm.model.scaffold100_size686073.30	147	1	hypothetical protein	GO:0008237 GO:0016805 GO:0006508	Acting_on_peptide_bonds_(peptidases)	S
evm.model.scaffold100_size686073.46	254	3	Ethylene-responsive transcription factor 5	GO:0051301 GO:0003700 GO:0045893 GO:0044212 GO:0050832 GO:0010200	NULL	K
evm.model.scaffold100_size686073.39	126	1	Uncharacterized protein	noGO	NULL	L
evm.model.scaffold100_size686073.60	257	3	Putative translocase subunit seca-like	noGO	NULL	none
evm.model.scaffold100_size686073.204	272	1	ER lumen protein retaining receptor	GO:0005789 GO:0098827 GO:0016021 GO:0046923 GO:0006621	NULL	U
evm.model.scaffold100_size686073.81	70	2	40S ribosomal protein S28	GO:0005737 GO:0003735 GO:0030490 GO:0000028 GO:0006412	NULL	J
evm.model.scaffold100_size686073.6	419	1	ultraviolet-B receptor UVR8-like	GO:0019904	NULL	DZ
evm.model.scaffold100_size686073.192	778	1	Putative unusual protein kinase	GO:0016021 GO:0004672 GO:0005524 GO:0015434 GO:0016787 GO:0006468 GO:0070574	ABC-type_Cd(2+)_transporter	S
evm.model.scaffold100_size686073.175	167	1	uncharacterized protein LOC113461697	noGO	NULL	L
evm.model.scaffold100_size686073.34	435	1	serine/threonine-protein phosphatase 7 long form homolog	noGO	NULL	S
evm.model.scaffold100_size686073.156	1588	1	Helicase, C-terminal	GO:0061630 GO:0031625 GO:0000209 GO:0006974 GO:0005654 GO:0004386 GO:0005524 GO:0046872	Adenosinetriphosphatase;Nucleoside-triphosphate_phosphatase	L
evm.model.scaffold100_size686073.142	405	1	GDSL esterase/lipase At1g71691-like	GO:0004806	Carboxylesterase;Triacylglycerol_lipase	I
evm.model.scaffold100_size686073.84	208	1	Coatomer subunit delta	GO:0009506 GO:0006890 GO:0015031 GO:0005829 GO:0000139 GO:0030126	NULL	U
evm.model.scaffold100_size686073.9	334	1	Two-component response regulator	GO:0003677 GO:0000160	NULL	K
evm.model.scaffold100_size686073.163	85	1	Uncharacterized protein (Fragment)	noGO	NULL	L
evm.model.scaffold100_size686073.42	201	1	hypothetical protein	noGO	NULL	S
evm.model.scaffold100_size686073.172	250	1	Expansin	GO:0006949 GO:0005618 GO:0016021 GO:0005576	NULL	S
evm.model.scaffold100_size686073.178	361	1	Putative haloacid-halidohydrolase	GO:0008801 GO:0016787	Beta-phosphoglucomutase	S
evm.model.scaffold100_size686073.59	169	4	Putative translocase subunit seca-like	noGO	NULL	none
evm.model.scaffold100_size686073.150	187	1	21 kDa protein-like	GO:0004857 GO:0043086	NULL	S
evm.model.scaffold100_size686073.54	85	1	hypothetical protein	noGO	NULL	S
evm.model.scaffold100_size686073.149	332	1	protein EXORDIUM-like 3	GO:0009506 GO:0080167 GO:0016021	NULL	S
evm.model.scaffold100_size686073.123	136	1	Uncharacterized protein	noGO	NULL	L
evm.model.scaffold100_size686073.8	1124	1	DNA annealing helicase and endonuclease ZRANB3	GO:0006281 GO:0090305 GO:0036310 GO:0043596 GO:0000733 GO:0009411 GO:0036292 GO:0004520 GO:0045910 GO:0005524 GO:0048478 GO:0070530 GO:0031297	Nucleoside-triphosphate_phosphatase	B
evm.model.scaffold1010_size24771.3	224	4	Calcineurin B-like protein 3	GO:0005513 GO:0055075 GO:0005509 GO:0019900 GO:0005886	NULL	T
evm.model.scaffold1010_size24771.4	422	4	Protein ROOT PRIMORDIUM DEFECTIVE 1-like	noGO	NULL	S
evm.model.scaffold1010_size24771.2	672	4	heat shock cognate protein 80-like	GO:0005829 GO:0005886 GO:0032991 GO:0048471 GO:0005524 GO:0051082 GO:0006457 GO:0034605 GO:0050821	NULL	O
evm.model.scaffold1011_size24759.3	496	1	GDP-fucose protein O-fucosyltransferase	GO:0005802 GO:0016757 GO:0016021 GO:0006004	NULL	G
evm.model.scaffold1011_size24759.4	170	1	Actin-related protein 2/3 complex subunit 4	GO:0003779 GO:0005737 GO:0034314 GO:0005885	NULL	Z
evm.model.scaffold1011_size24759.1	379	1	Alcohol dehydrogenase, class III	GO:0008270 GO:0046294 GO:0051903 GO:0009753 GO:0005829 GO:0035834 GO:0055114 GO:0102311 GO:0004024	8-hydroxygeraniol_dehydrogenase;S-(hydroxymethyl)glutathione_dehydrogenase;Alcohol_dehydrogenase	Q
evm.model.scaffold1011_size24759.2	680	1	protein CASP-like	GO:0005802 GO:0030173 GO:0006891	NULL	K
evm.model.scaffold1012_size24664.2	427	1	Ribulose bisphosphate carboxylase/oxygenase activase, chloroplastic-like	GO:0009570 GO:0043085 GO:0046863 GO:0009579 GO:0005524 GO:0016787	NULL	O
evm.model.scaffold1012_size24664.1	423	1	protein TIC 40, chloroplastic	GO:0009706 GO:0045037 GO:0009658 GO:0009535	NULL	OT
evm.model.scaffold1012_size24664.4	137	3	Uncharacterized protein	noGO	NULL	none
evm.model.scaffold1012_size24664.6	137	3	Uncharacterized protein	noGO	NULL	none
evm.model.scaffold1013_size24420.1	203	1	hypothetical protein	noGO	NULL	S
evm.model.scaffold1013_size24420.4	916	1	5-3 exoribonuclease	GO:0090503 GO:0008270 GO:0010494 GO:0031087 GO:0000932 GO:0040029 GO:0005844 GO:0051301 GO:0004534 GO:0009826 GO:0070370 GO:0000291 GO:0003729 GO:0005829 GO:0010587	Acting_on_ester_bonds;Acting_on_ester_bonds	AL
evm.model.scaffold1014_size24417.1	153	1	MLP-like protein 34-like	GO:0009507 GO:0006952	NULL	S
evm.model.scaffold1014_size24417.3	242	1	Uncharacterized protein	noGO	NULL	S
evm.model.scaffold1017_size24084.7	1242	1	Putative e3 ubiquitin-protein ligase lin-1	GO:0005515	NULL	S
evm.model.scaffold1017_size24084.2	925	1	probable arabinosyltransferase ARAD1	GO:0006486 GO:0016021 GO:0102983	Xylogalacturonan_beta-1,3-xylosyltransferase	GMW
evm.model.scaffold1018_size24047.4	270	4	Transcription initiation factor TFIID subunit 14b	GO:0090239 GO:0003743 GO:0035267 GO:0009909 GO:0048510 GO:0043981 GO:0006355 GO:0006413 GO:2000028	NULL	K
evm.model.scaffold1018_size24047.7	1068	4	Zinc finger CCCH domain-containing protein 19	GO:0003677 GO:0042393 GO:0046872 GO:0005829 GO:0008168 GO:0010964 GO:0005840 GO:0032776	NULL	K
evm.model.scaffold1018_size24047.3	172	4	Peptidyl-prolyl cis-trans isomerase	GO:0016018 GO:0009507 GO:0003755 GO:0009506 GO:0007165 GO:0005829 GO:0051082 GO:0000413 GO:0042026 GO:0005774 GO:0005886	Peptidylprolyl_isomerase	O
evm.model.scaffold1019_size23903.2	488	1	enolase 1, chloroplastic-like	GO:0009570 GO:0000287 GO:0004634 GO:0006096 GO:0000015 GO:0009735	Phosphopyruvate_hydratase	G
evm.model.scaffold1019_size23903.1	254	1	protein CHAPERONE-LIKE PROTEIN OF POR1, chloroplastic	GO:0009570 GO:0009706 GO:0008219 GO:0005515 GO:0044183 GO:0009793 GO:0003824 GO:0061077 GO:0016021 GO:1904216 GO:0009658 GO:0009535	NULL	S
evm.model.scaffold1019_size23903.3	685	1	Serine protease SPPA, chloroplastic	GO:0004252 GO:0009941 GO:0016021 GO:0006465 GO:0009535	Acting_on_peptide_bonds_(peptidases)	OU
evm.model.scaffold101_size679088.91	155	4	Putative ovule protein	noGO	NULL	S
evm.model.scaffold101_size679088.30	398	1	probable protein phosphatase 2C 5	GO:0005886 GO:0004724 GO:0006470 GO:0005829	Protein-serine/threonine_phosphatase	T
evm.model.scaffold101_size679088.135	91	4	LYR motif-containing protein	noGO	NULL	S
evm.model.scaffold101_size679088.74	187	4	Putative peptidase S24/S26A/S26B/S26C family protein	noGO	NULL	OU
evm.model.scaffold101_size679088.123	153	1	Histone deacetylase superfamily	GO:0070848 GO:0000978 GO:1901300 GO:0005875 GO:0060765 GO:0005874 GO:0061734 GO:0030425 GO:0005901 GO:0006515 GO:0045892 GO:0070842 GO:0005829 GO:0034983 GO:0070840 GO:0070845 GO:0070846 GO:0030424 GO:0033138 GO:0008270 GO:0042826 GO:0042903 GO:0060271 GO:0031593 GO:0032041 GO:0009967 GO:0060632 GO:0031625 GO:0043242 GO:0010469 GO:0090035 GO:0000118 GO:0045861 GO:0005771 GO:0043204 GO:0010634 GO:…	Histone_deacetylase	K
evm.model.scaffold101_size679088.133	381	1	dnaJ protein homolog 1-like	GO:1904158 GO:0097224 GO:0051087 GO:0051085 GO:0005829 GO:0051082	NULL	O
evm.model.scaffold101_size679088.146	108	2	hypothetical protein	noGO	NULL	S
evm.model.scaffold101_size679088.75	449	4	11S globulin seed storage protein 2-like	GO:0042735 GO:0045735 GO:0051259	NULL	O
evm.model.scaffold101_size679088.63	269	1	40S ribosomal protein S2-4	GO:0009506 GO:0003735 GO:0005618 GO:0016020 GO:0003729 GO:0006412	NULL	J
evm.model.scaffold101_size679088.66	253	3	Uncharacterized protein	noGO	NULL	K
evm.model.scaffold101_size679088.78	347	Singleton	protein TRIGALACTOSYLDIACYLGLYCEROL 1, chloroplastic	GO:0009707 GO:0009706 GO:0006869 GO:0005319	NULL	Q
evm.model.scaffold101_size679088.114	265	1	Uncharacterized protein	noGO	NULL	S
evm.model.scaffold101_size679088.37	93	1	hypothetical protein	noGO	NULL	S
evm.model.scaffold101_size679088.86	377	1	Actin	GO:0009506 GO:0005856 GO:0007010 GO:0005618 GO:0005829 GO:0048767 GO:0005200 GO:0005886 GO:0005524	NULL	Z
evm.model.scaffold101_size679088.46	215	1	uncharacterized protein LOC104588768	noGO	NULL	L
evm.model.scaffold101_size679088.85	785	1	Ft-interacting protein 1	GO:0016757 GO:0015031 GO:0008565 GO:0009511 GO:0009911 GO:0005215 GO:0005654 GO:0005789 GO:0005515 GO:0005509 GO:0048574 GO:0016021 GO:0005829 GO:0019722 GO:0034613	NULL	S
evm.model.scaffold101_size679088.156	140	1	Putative thiazole synthase-like	noGO	NULL	S
evm.model.scaffold101_size679088.61	83	3	Uncharacterized protein	noGO	NULL	S
evm.model.scaffold101_size679088.2	122	4	Putative ovule protein	noGO	NULL	none
evm.model.scaffold101_size679088.77	524	4	Inorganic phosphate transporter 1-4	GO:0005315 GO:0055085 GO:0006817 GO:0016021	NULL	P
evm.model.scaffold101_size679088.64	149	1	Calmodulin	GO:0005513 GO:0005515 GO:0005509 GO:0005829 GO:0019722	NULL	T
evm.model.scaffold101_size679088.23	222	1	Ras-related protein rgp1	GO:0003924 GO:0005525 GO:0006886 GO:0032482	Nucleoside-triphosphate_phosphatase	U
evm.model.scaffold101_size679088.166	134	2	hypothetical protein	noGO	NULL	S
evm.model.scaffold101_size679088.157	344	1	Uncharacterized protein	noGO	NULL	S
evm.model.scaffold101_size679088.68	170	1	Uncharacterized protein	noGO	NULL	S
evm.model.scaffold101_size679088.171	134	2	hypothetical protein	noGO	NULL	S
evm.model.scaffold101_size679088.165	257	1	Probable 6-phosphogluconolactonase	GO:0009570 GO:0009051 GO:0005774 GO:0042742 GO:0042128 GO:0005777 GO:0071461 GO:0005975 GO:0002229 GO:0019682 GO:0019693 GO:0046496 GO:0005829 GO:0017057 GO:0016740	6-phosphogluconolactonase;Carboxylesterase	G
evm.model.scaffold101_size679088.10	671	1	poly(ADP-ribose) glycohydrolase 1-like	GO:0006979 GO:0005975 GO:0004649 GO:0006282 GO:0090332 GO:0006970 GO:1901135 GO:0050832 GO:0044424 GO:0009414	Poly(ADP-ribose)_glycohydrolase	T
evm.model.scaffold101_size679088.112	422	1	beta-glucuronosyltransferase GlcAT14B-like	GO:0008375 GO:0016021 GO:0030158	Protein_xylosyltransferase	G
evm.model.scaffold101_size679088.71	394	1	Putative E3 ubiquitin ligase	GO:0004842 GO:0044390 GO:0036513 GO:0098827 GO:0071712 GO:0016567	NULL	O
evm.model.scaffold101_size679088.94	565	4	Putative sulfate transporter 4.2	GO:0005887 GO:0008271 GO:0015301 GO:1902358	NULL	P
evm.model.scaffold101_size679088.48	516	1	Uncharacterized protein	noGO	NULL	S
evm.model.scaffold101_size679088.162	154	1	hypothetical protein	noGO	NULL	S
evm.model.scaffold101_size679088.24	241	1	transcription factor bHLH130-like	GO:0046983	NULL	K
evm.model.scaffold101_size679088.89	208	4	40S ribosomal protein S5	GO:0003735 GO:0003729 GO:0000028 GO:0019843 GO:0006412	NULL	J
evm.model.scaffold101_size679088.59	444	1	Uncharacterized protein	noGO	NULL	S
evm.model.scaffold101_size679088.143	90	2	hypothetical protein	noGO	NULL	S
evm.model.scaffold101_size679088.45	461	1	Uncharacterized protein	noGO	NULL	L
evm.model.scaffold101_size679088.39	244	1	uncharacterized protein LOC104611892	noGO	NULL	L
evm.model.scaffold101_size679088.115	256	1	hypothetical protein	noGO	NULL	S
evm.model.scaffold101_size679088.82	596	4	F-box/LRR-repeat protein 17-like	GO:0005515 GO:0009793 GO:0016020 GO:0009555 GO:0055047 GO:0031146 GO:0019005	NULL	S
evm.model.scaffold101_size679088.62	83	3	hypothetical protein	noGO	NULL	S
evm.model.scaffold101_size679088.26	619	4	serine/threonine-protein phosphatase 7 long form homolog	noGO	NULL	S
evm.model.scaffold101_size679088.5	459	4	probable arabinosyltransferase ARAD1	GO:0006486 GO:0016021 GO:0102983	Xylogalacturonan_beta-1,3-xylosyltransferase	GMW
evm.model.scaffold101_size679088.73	463	1	serine/threonine-protein phosphatase 7 long form homolog	noGO	NULL	T
evm.model.scaffold101_size679088.98	433	1	Malate dehydrogenase	GO:0009570 GO:0030060 GO:0006101 GO:0009941 GO:0006099 GO:0046554 GO:0008746 GO:0009579 GO:0051775 GO:0005975 GO:0006734 GO:0006107 GO:0006108 GO:0046496 GO:0019674	NAD(P)(+)_transhydrogenase_(Si-specific);Malate_dehydrogenase;Malate_dehydrogenase_(NADP(+))	C
evm.model.scaffold101_size679088.97	339	1	protein BTR1-like isoform X1	GO:0046719 GO:0008380 GO:0003729 GO:0009735	NULL	A
evm.model.scaffold101_size679088.144	133	2	Uncharacterized protein	noGO	NULL	L
evm.model.scaffold101_size679088.80	278	4	Histone H1	GO:0031936 GO:0030261 GO:0031492 GO:0003690 GO:0016584 GO:0005730 GO:0000786 GO:0006334 GO:0045910	NULL	B
evm.model.scaffold101_size679088.151	326	Singleton	Glutamyl-tRNA reductase-binding protein, chloroplastic	GO:0009570 GO:0048037 GO:0043495 GO:0009791 GO:0009534 GO:0070455 GO:0009767	NULL	S
evm.model.scaffold101_size679088.142	206	2	hypothetical protein	noGO	NULL	S
evm.model.scaffold101_size679088.69	244	1	Uncharacterized protein	noGO	NULL	S
evm.model.scaffold101_size679088.147	90	2	hypothetical protein	noGO	NULL	S
evm.model.scaffold101_size679088.168	198	1	Uncharacterized protein	GO:0003676 GO:0006807 GO:0043170 GO:0044237 GO:0044238	NULL	L
evm.model.scaffold101_size679088.140	133	2	Uncharacterized protein	noGO	NULL	S
evm.model.scaffold101_size679088.152	503	1	Putative lipase	GO:0016021 GO:0016787 GO:0006629	NULL	I
evm.model.scaffold101_size679088.145	103	2	hypothetical protein	noGO	NULL	S
evm.model.scaffold101_size679088.95	233	4	Otu domain-containing protein	noGO	NULL	O
evm.model.scaffold101_size679088.128	88	1	hypothetical protein	noGO	NULL	S
evm.model.scaffold101_size679088.88	505	4	Homogentisate solanesyltransferase	GO:0005515 GO:0008270 GO:0016740	NULL	S
evm.model.scaffold101_size679088.141	103	2	hypothetical protein	noGO	NULL	S
evm.model.scaffold101_size679088.65	250	3	Uncharacterized protein	noGO	NULL	K
evm.model.scaffold101_size679088.139	849	1	Spastin like	GO:0005524 GO:0016887	Adenosinetriphosphatase;Nucleoside-triphosphate_phosphatase	O
evm.model.scaffold101_size679088.187	116	1	hypothetical protein	noGO	NULL	S
evm.model.scaffold1020_size23896.2	528	3	Glucomannan 4-beta-mannosyltransferase 2-like	GO:0016021 GO:0047259 GO:0097502	Glucomannan_4-beta-mannosyltransferase	M
evm.model.scaffold1020_size23896.3	555	3	glucomannan 4-beta-mannosyltransferase 2-like	GO:0051753 GO:0010192 GO:0097502 GO:0016021 GO:0048359 GO:0047259	Glucomannan_4-beta-mannosyltransferase	M
evm.model.scaffold1021_size23839.6	178	1	hypothetical protein	noGO	NULL	S
evm.model.scaffold1021_size23839.5	579	1	Uncharacterized protein	noGO	NULL	L
evm.model.scaffold1022_size23813.2	173	4	AT-rich interactive domain-containing protein	noGO	NULL	S
evm.model.scaffold1022_size23813.8	157	4	17.9 kDa class II heat shock protein	GO:0043621 GO:0051082 GO:0006457 GO:0009408 GO:0009644 GO:0009651 GO:0042542 GO:0051259	NULL	O
evm.model.scaffold1022_size23813.9	522	4	Non-specific serine/threonine protein kinase	GO:0005524 GO:0004674 GO:0018105 GO:0035556	Transferring_phosphorus-containing_groups	T
evm.model.scaffold1022_size23813.5	619	4	Pentatricopeptide repeat-containing protein	GO:0090305 GO:0009507 GO:0008270 GO:0003723 GO:0005515 GO:0009451 GO:0004519	NULL	S
evm.model.scaffold1023_size23732.3	72	1	serine/threonine-protein phosphatase 7 long form homolog	noGO	NULL	S
evm.model.scaffold1024_size23622.2	380	1	Agglutinin-like protein ALA1, putative isoform 1	GO:0006355 GO:0007623	NULL	S
evm.model.scaffold1024_size23622.1	1039	1	Protein CHROMATIN REMODELING 24	GO:0045951 GO:0046686 GO:0005524 GO:0016787	NULL	KL
evm.model.scaffold1024_size23622.4	363	1	60S ribosomal protein L34, putative	noGO	NULL	S
evm.model.scaffold1025_size23620.3	168	1	Pectinesterase inhibitor-like	noGO	NULL	S
evm.model.scaffold1027_size23586.1	1479	1	Phosphatidylinositol-4, 5-bisphosphate phosphodiesterase gamma	GO:0016021 GO:0019898 GO:0006623 GO:0045053	NULL	U
evm.model.scaffold1028_size23508.2	661	1	Plasma membrane ATPase	noGO	NULL	none
evm.model.scaffold1028_size23508.1	320	1	protein TPX2-like isoform X2	GO:0005819 GO:0005874 GO:0032147 GO:0060236	NULL	S
evm.model.scaffold1029_size23488.2	169	4	Mitochondrial import protein TIM15	GO:0030150 GO:0051087 GO:0006457 GO:0050821 GO:0005654 GO:0008270	NULL	S
evm.model.scaffold1029_size23488.6	147	4	Uncharacterized protein	noGO	NULL	S
evm.model.scaffold1029_size23488.5	93	4	Transmembrane protein	noGO	NULL	S
evm.model.scaffold102_size677817.126	656	3	Tubulin beta chain	GO:0009570 GO:0016602 GO:0016757 GO:0006355 GO:0005200 GO:0046686 GO:0000226 GO:0005774 GO:0005886 GO:0000278 GO:0005874 GO:0005525 GO:0003677 GO:0003700 GO:0009506 GO:0045298 GO:0003924 GO:0005618 GO:0003729 GO:0005829	Nucleoside-triphosphate_phosphatase	Z
evm.model.scaffold102_size677817.11	575	4	Putative inactive tRNA-specific adenosine deaminase-like protein 3	GO:0052717 GO:0052718 GO:0002100	Adenosine_deaminase	A
evm.model.scaffold102_size677817.55	316	1	Protease Do-like 5, chloroplastic	GO:0006508 GO:0004252 GO:0009543 GO:0010206	Acting_on_peptide_bonds_(peptidases)	O
evm.model.scaffold102_size677817.80	187	1	hypothetical protein	noGO	NULL	S
evm.model.scaffold102_size677817.19	437	1	StAR-related lipid transfer protein 7, mitochondrial	GO:0016020 GO:0005548 GO:0008289 GO:0015914	NULL	I
evm.model.scaffold102_size677817.135	237	1	Uncharacterized protein	GO:0003700	NULL	none
evm.model.scaffold102_size677817.105	572	1	Uncharacterized protein	noGO	NULL	S
evm.model.scaffold102_size677817.74	113	1	probable protein phosphatase 2C 6	GO:0004724 GO:0006470	Protein-serine/threonine_phosphatase	O
evm.model.scaffold102_size677817.158	1148	1	Epidermin biosynthesis protein like	noGO	NULL	none
evm.model.scaffold102_size677817.99	120	1	hypothetical protein	noGO	NULL	S
evm.model.scaffold102_size677817.156	99	4	hypothetical protein	noGO	NULL	S
evm.model.scaffold102_size677817.150	299	4	B-box zinc finger protein 22	GO:0008270 GO:0000989 GO:0000988 GO:0006355 GO:0140110	NULL	S
evm.model.scaffold102_size677817.163	205	4	protodermal factor 1-like	GO:0005576 GO:0016021	NULL	S
evm.model.scaffold102_size677817.117	211	3	Protein NETWORKED 3A	GO:0031965 GO:0005774 GO:0003779	NULL	S
evm.model.scaffold102_size677817.165	516	4	11-oxo-beta-amyrin 30-oxidase	GO:0016021 GO:0004497 GO:0005506 GO:0016705 GO:0020037 GO:0050616 GO:0055114	Acting_on_the_CH-CH_group_of_donors	Q
evm.model.scaffold102_size677817.9	604	4	Pentatricopeptide repeat-containing protein	GO:0090305 GO:0003723 GO:0009451 GO:0004519 GO:0043231 GO:0005515	NULL	S
evm.model.scaffold102_size677817.173	319	4	Peroxidase	GO:1901430 GO:0009531 GO:0020037 GO:0042744 GO:0004601 GO:0009816 GO:0009519 GO:0006979 GO:0046872 GO:0098869 GO:0005829 GO:0055114 GO:0010089	Peroxidase	Q
evm.model.scaffold102_size677817.151	401	4	probable sodium/metabolite cotransporter BASS1, chloroplastic	GO:0009941 GO:0016021 GO:0098717	NULL	P
evm.model.scaffold102_size677817.169	425	4	Aspartate aminotransferase	GO:0030170 GO:0006536 GO:0005507 GO:0006531 GO:0046686 GO:0009058 GO:0004069 GO:0006103	Aspartate_transaminase	E
evm.model.scaffold102_size677817.152	128	4	NHP2-like protein 1	GO:0031428 GO:0032040 GO:0000470 GO:0046540 GO:0005690 GO:0071005 GO:0005840 GO:0030622 GO:0000398	NULL	AJ
evm.model.scaffold102_size677817.18	1027	1	Acylamino-acid-releasing enzyme-like isoform X1	GO:0005525 GO:0043231 GO:0006508 GO:0008236 GO:0004177 GO:0044444	Acting_on_peptide_bonds_(peptidases)	O
evm.model.scaffold102_size677817.37	225	3	F-box protein FBW2-like	GO:0010608 GO:0010629 GO:0009737 GO:0016567 GO:0006511 GO:0005515	NULL	S
evm.model.scaffold102_size677817.50	675	1	Hydroxyproline o-galactosyltransferase galt2	GO:0047220 GO:0010405 GO:0016021 GO:1990714 GO:0080147 GO:0030246 GO:0018258	Galactosylxylosylprotein_3-beta-galactosyltransferase	G
evm.model.scaffold102_size677817.166	458	4	F-box protein	GO:0005515	NULL	S
evm.model.scaffold102_size677817.128	400	1	UBP1-associated protein 2C-like	GO:0003723	NULL	A
evm.model.scaffold102_size677817.136	373	1	peroxisomal (S)-2-hydroxy-acid oxidase GLO1	GO:0009570 GO:0010181 GO:0008891 GO:0042742 GO:0009735 GO:0009854 GO:0052852 GO:0052853 GO:0005777 GO:0009506 GO:0016020 GO:0055114 GO:0052854 GO:0050665	(S)-2-hydroxy-acid_oxidase	C
evm.model.scaffold102_size677817.61	106	1	hypothetical protein	noGO	NULL	S
evm.model.scaffold102_size677817.54	410	1	Transcription termination factor mtef1, chloroplastic	GO:0009507 GO:0003690 GO:0006355 GO:0009658 GO:0032502	NULL	K
evm.model.scaffold102_size677817.35	211	1	vacuolar protein sorting-associated protein 32 homolog 2-like	GO:0000815 GO:0070676 GO:0005886 GO:0007034	NULL	U
evm.model.scaffold102_size677817.137	117	1	Protein TIFY 5A	GO:0003714 GO:0009611 GO:2000022 GO:0031347 GO:1903507	NULL	S
evm.model.scaffold102_size677817.31	315	1	probable WRKY transcription factor 14	GO:0003700 GO:0009793 GO:0009555 GO:0006355 GO:0043565	NULL	K
evm.model.scaffold102_size677817.12	604	4	type IV inositol polyphosphate 5-phosphatase 7-like	GO:0034485 GO:0046855 GO:0005886 GO:0004445 GO:0046856 GO:0032957 GO:0071472 GO:0009737 GO:0048016 GO:0004439 GO:2000377 GO:0010588 GO:0010305 GO:0052658 GO:0052659 GO:0010067	Phosphoinositide_5-phosphatase;Inositol-polyphosphate_5-phosphatase	T
evm.model.scaffold102_size677817.26	364	4	transcription factor GTE1-like	GO:0010030 GO:0004402 GO:0006338 GO:0005515 GO:0045893 GO:0016573	Arylamine_N-acetyltransferase;Histone_acetyltransferase	K
evm.model.scaffold102_size677817.57	591	1	hypothetical protein	noGO	NULL	S
evm.model.scaffold102_size677817.6	565	4	Putative F28L1.9 protein-like	GO:0016021	NULL	none
evm.model.scaffold102_size677817.101	504	1	Uncharacterized protein	noGO	NULL	L
evm.model.scaffold102_size677817.60	156	1	Uncharacterized protein	noGO	NULL	S
evm.model.scaffold102_size677817.112	562	3	Chaperone protein dnaJ 13	GO:0055122 GO:0016021 GO:0010228 GO:0009536	NULL	O
evm.model.scaffold102_size677817.178	589	Singleton	Ketol-acid reductoisomerase	GO:0009570 GO:0009097 GO:0042803 GO:0009099 GO:0009941 GO:0046686 GO:0004455 GO:0000287 GO:0005507 GO:0005618 GO:0070402 GO:0055114 GO:0016853	Ketol-acid_reductoisomerase_(NADP(+))	E
evm.model.scaffold102_size677817.167	862	4	probable alpha,alpha-trehalose-phosphate synthase [UDP-forming] 7	GO:0003825 GO:0004805 GO:0016021 GO:0005829 GO:0070413 GO:0005992 GO:0016311	Alpha,alpha-trehalose-phosphate_synthase_(UDP-forming);Trehalose-phosphatase	G
evm.model.scaffold102_size677817.131	372	1	WUSCHEL-related homeobox 9	GO:0010075 GO:0003700 GO:0005737 GO:0008284 GO:0044212 GO:0090451 GO:0030010 GO:0006355 GO:0043565 GO:0048825	NULL	K
evm.model.scaffold102_size677817.24	332	1	Malate dehydrogenase	GO:0005975 GO:0006734 GO:0030060 GO:0006107 GO:0006108 GO:0006099	Malate_dehydrogenase	C
evm.model.scaffold102_size677817.132	531	1	General substrate transporter	GO:0098656 GO:0008643 GO:0016021 GO:0042631 GO:0008514 GO:0015711 GO:0009535	NULL	S
evm.model.scaffold102_size677817.179	761	1	Pentatricopeptide repeat-containing protein	GO:0090305 GO:0003723 GO:0009451 GO:0004519 GO:0043231 GO:0005515	NULL	S
evm.model.scaffold102_size677817.113	186	1	rRNA-processing protein FYV7	noGO	NULL	S
evm.model.scaffold102_size677817.33	422	3	UDP-arabinose 4-epimerase 1	GO:0009793 GO:0003978 GO:0032580 GO:0050373 GO:0016021 GO:0006012 GO:0019567 GO:0045227 GO:0033358 GO:0048868	UDP-arabinose_4-epimerase;UDP-glucose_4-epimerase	G
evm.model.scaffold102_size677817.176	160	2	Protein LIGHT-DEPENDENT SHORT HYPOCOTYLS 10	GO:0090698 GO:0009299 GO:0009416	NULL	S
evm.model.scaffold102_size677817.159	363	1	PHD finger 21B	GO:0003677	NULL	S
evm.model.scaffold102_size677817.51	615	1	Putative cytochrome P450	GO:0016021 GO:0004497 GO:0005506 GO:0016705 GO:0020037 GO:0055114	NULL	Q
evm.model.scaffold102_size677817.21	734	4	Cellulose synthase (UDP-forming)	GO:0016021 GO:0016760 GO:0030244 GO:0071555 GO:0009833 GO:0005886	Cellulose_synthase_(UDP-forming)	G
evm.model.scaffold102_size677817.154	406	4	protein SIP5	GO:0005737 GO:0003824 GO:0048638 GO:0051239	NULL	O
evm.model.scaffold102_size677817.36	131	3	F-box protein FBW2-like	GO:0010608 GO:0010629 GO:0009737 GO:0016567 GO:0006511 GO:0005515	NULL	S
evm.model.scaffold102_size677817.20	1064	1	MATH domain-containing protein	GO:1905037 GO:0045087 GO:0005829 GO:0043424 GO:0005886	NULL	S
evm.model.scaffold102_size677817.25	752	1	probable rhamnogalacturonate lyase B	GO:0005975 GO:0016020 GO:0016829 GO:0030246	NULL	S
evm.model.scaffold102_size677817.17	222	1	1,2-dihydroxy-3-keto-5-methylthiopentene dioxygenase	GO:0051302 GO:0010297 GO:0005506 GO:0019509 GO:0010309 GO:0005829 GO:0055114 GO:0001871	Acting_on_single_donors_with_incorporation_of_molecular_oxygen_(oxygenases)._The_oxygen_incorporated_need_not_be_derived_from_O(2);Acireductone_dioxygenase_(Fe(2+)-requiring)	E
evm.model.scaffold102_size677817.118	474	1	ATP-dependent RNA helicase SUV3, mitochondrial	GO:0070827 GO:0000958 GO:1901002 GO:0008186 GO:0009555 GO:0045025 GO:0080038 GO:0030307 GO:0070584 GO:0003725 GO:0032508 GO:1902584 GO:0006310 GO:0000965 GO:0000962 GO:0003677 GO:0003678 GO:0010929 GO:0005759 GO:0070035 GO:0043066 GO:0009939 GO:0035945 GO:0035946 GO:0034458	Adenosinetriphosphatase;DNA_helicase;RNA_helicase;Nucleoside-triphosphate_phosphatase	A
evm.model.scaffold102_size677817.134	178	1	Putative serine protease 45-like	GO:0016020 GO:0008233 GO:0006508	NULL	S
evm.model.scaffold102_size677817.7	705	4	NEDD8-activating enzyme E1 catalytic subunit	GO:0046982 GO:0005737 GO:0019781 GO:0045116	NULL	O
evm.model.scaffold102_size677817.8	1426	4	protein TIME FOR COFFEE-like isoform X3	GO:0042752	NULL	S
evm.model.scaffold102_size677817.23	350	4	WAT1-related protein	GO:0055085 GO:0022857 GO:0016021	NULL	S
evm.model.scaffold102_size677817.40	120	1	hypothetical protein	noGO	NULL	S
evm.model.scaffold102_size677817.49	308	Singleton	ribosome-binding factor PSRP1, chloroplastic-like	GO:0009570 GO:0043022 GO:0009534 GO:0043024 GO:0045900	NULL	J
evm.model.scaffold102_size677817.161	282	4	Xyloglucan endotransglucosylase/hydrolase	GO:0009741 GO:0004553 GO:0042546 GO:0009612 GO:0009733 GO:0009409 GO:0009408 GO:0005618 GO:0016021 GO:0071555 GO:0016762 GO:0030246 GO:0010411	Xyloglucan:xyloglucosyl_transferase	G
evm.model.scaffold102_size677817.133	503	1	putative beta-glucosidase 41 isoform X1	GO:0005975 GO:0008422 GO:1901657 GO:0102483	Beta-glucosidase	G
evm.model.scaffold102_size677817.177	966	1	Phosphoenolpyruvate carboxylase 2	GO:0090377 GO:0032440 GO:0090378 GO:0006099 GO:0005886 GO:0008964 GO:0009507 GO:0009506 GO:0048366 GO:0051262 GO:0005829 GO:0016036 GO:0015977	2-alkenal_reductase_(NAD(P)(+));Phosphoenolpyruvate_carboxylase;Phosphoenolpyruvate_carboxykinase_(GTP)	C
evm.model.scaffold102_size677817.77	88	1	Uncharacterized protein	noGO	NULL	S
evm.model.scaffold102_size677817.119	387	2	rho GTPase-activating protein 2	GO:0007165	NULL	T
evm.model.scaffold102_size677817.174	160	4	Protein LIGHT-DEPENDENT SHORT HYPOCOTYLS 10	GO:0090698 GO:0009299 GO:0009416	NULL	S
evm.model.scaffold102_size677817.130	427	1	Mg-protoporphyrin IX chelatase	GO:0016887 GO:0015995 GO:0009570 GO:0005524 GO:0005618 GO:0016020 GO:0006486 GO:0008378 GO:0015979 GO:0016851 GO:0009735	Adenosinetriphosphatase;Nucleoside-triphosphate_phosphatase;Magnesium_chelatase	F
evm.model.scaffold102_size677817.125	588	1	Cationic amino acid transporter 1	GO:0015189 GO:0051938 GO:0016021 GO:1903401 GO:0015813 GO:0005886 GO:0005313	NULL	E
evm.model.scaffold102_size677817.129	358	1	protein trichome birefringence-like 38	GO:0071554 GO:0016413	NULL	S
evm.model.scaffold102_size677817.27	244	1	Peroxygenase-like	GO:0009793 GO:0004392 GO:0006952 GO:0031090 GO:0005811 GO:0004601 GO:1990137 GO:0005509 GO:0031408 GO:0098869 GO:0016021 GO:0034389 GO:0055114 GO:0071614	Acting_on_paired_donors,_with_incorporation_or_reduction_of_molecular_oxygen._The_oxygen_incorporated_need_not_be_derived_from_O(2);Plant_seed_peroxygenase;Peroxidase	S
evm.model.scaffold102_size677817.38	254	3	F-box protein FBW2-like	GO:0005515	NULL	S
evm.model.scaffold102_size677817.116	253	3	protein NETWORKED 3A-like	GO:0031965 GO:0005774 GO:0003779	NULL	S
evm.model.scaffold102_size677817.5	206	4	Ribosomal protein L34Ae protein	GO:0003723 GO:0003735 GO:0016021 GO:0042254 GO:0005840 GO:0006412	NULL	S
evm.model.scaffold102_size677817.160	391	1	putative ribosome biogenesis protein C8F11.04	GO:0042981 GO:0005730 GO:2000772	NULL	S
evm.model.scaffold102_size677817.30	577	1	Chaperonin CPN60-2, mitochondrial	GO:0009570 GO:0061077 GO:0009941 GO:0046686 GO:0051082 GO:0042026 GO:0005774 GO:0006458 GO:0009735 GO:0005886 GO:0042788 GO:0045041 GO:0005524 GO:0009408 GO:0044183 GO:0005507 GO:0003735 GO:0005759 GO:0051117	NULL	O
evm.model.scaffold102_size677817.22	745	1	Ethylene receptor	GO:0005789 GO:0000155 GO:0005524 GO:0042802 GO:0051740 GO:0046872 GO:0038199 GO:0010105 GO:0016021 GO:0004674 GO:0023014	Transferring_phosphorus-containing_groups;Histidine_kinase	T
evm.model.scaffold102_size677817.76	278	1	hypothetical protein	noGO	NULL	S
evm.model.scaffold102_size677817.157	272	1	Chlorophyll a-b binding protein, chloroplastic	GO:0019904 GO:0009644 GO:0009523 GO:0009941 GO:0009522 GO:0009768 GO:0009735 GO:0009645 GO:0009535 GO:0009409 GO:0046872 GO:0031409 GO:0016021 GO:0018298 GO:0016168	NULL	C
evm.model.scaffold102_size677817.155	628	4	C2 domain-containing protein	GO:0005886 GO:0016021 GO:0008289 GO:0006869	NULL	M
evm.model.scaffold102_size677817.28	374	1	Zinc finger protein CONSTANS-LIKE 4	GO:0009909 GO:0009416 GO:0005515	NULL	K
evm.model.scaffold1030_size23415.4	228	1	berberine bridge enzyme-like 8	noGO	NULL	S
evm.model.scaffold1030_size23415.5	462	1	Serine carboxypeptidase-like 17	GO:0006508 GO:0004185	Acting_on_peptide_bonds_(peptidases);Acting_on_peptide_bonds_(peptidases)	EO
evm.model.scaffold1032_size23090.1	318	1	probable ADP,ATP carrier protein At5g56450	GO:0042910 GO:0006855 GO:0098656 GO:0048653 GO:0005471 GO:0016021 GO:0015867 GO:1901679 GO:0046902 GO:0015866 GO:0005743	NULL	C
evm.model.scaffold1033_size23071.1	595	1	1,4-alpha-glucan-branching enzyme 1, chloroplastic/amyloplastic	GO:0009570 GO:0010021 GO:0009793 GO:0043169 GO:0004553 GO:0071482 GO:0005978 GO:0003844 GO:0071332 GO:0019252 GO:0071333 GO:0102752 GO:0071329	1,4-alpha-glucan_branching_enzyme	G
evm.model.scaffold1035_size22867.2	884	4	Histone-lysine N-methyltransferase SUVR1	GO:0005515 GO:0008270 GO:0018024 GO:0034968	Histone-lysine_N-methyltransferase	B
evm.model.scaffold1035_size22867.5	1000	4	protein QUIRKY-like	GO:0045806 GO:0046928 GO:0016757 GO:1902883 GO:0005789 GO:0005509 GO:0048168 GO:0016021 GO:0055037 GO:0030672 GO:0019722 GO:0030336 GO:0098827	NULL	S
evm.model.scaffold1035_size22867.3	111	4	hypothetical protein	noGO	NULL	S
evm.model.scaffold1035_size22867.8	855	4	Putative ovule protein	noGO	NULL	S
evm.model.scaffold1035_size22867.7	488	4	Armadillo-like helical	noGO	NULL	S
evm.model.scaffold1036_size22764.3	489	1	Deoxyribodipyrimidine photo-lyase	GO:0071949 GO:0000719 GO:0009650 GO:0003904	Deoxyribodipyrimidine_photo-lyase;Carbon-carbon_lyases	LT
evm.model.scaffold1036_size22764.4	409	1	Dentin sialophosphoprotein-like	noGO	NULL	S
evm.model.scaffold1036_size22764.2	427	1	Irk-interacting protein	GO:0016020	NULL	none
evm.model.scaffold1036_size22764.5	412	1	probable sodium/metabolite cotransporter BASS5, chloroplastic isoform X1	GO:0043879 GO:0042910 GO:0033506 GO:0009941 GO:0097339 GO:0009611 GO:0009753 GO:0016021	NULL	P
evm.model.scaffold1037_size22605.1	471	1	protein indeterminate-domain 2-like	GO:0003676	NULL	O
evm.model.scaffold1038_size22408.1	1530	1	myosin-17-like isoform X1	GO:0090436 GO:0016459 GO:0060151 GO:0033275 GO:0048768 GO:0007015 GO:0043531 GO:0042641 GO:0000146 GO:0051015 GO:0051301 GO:0000331 GO:0030898 GO:0005524 GO:0009506 GO:0048467 GO:0046740 GO:0035619 GO:0140027 GO:0030133 GO:0051646 GO:0051645	Adenosinetriphosphatase;Nucleoside-triphosphate_phosphatase	Z
evm.model.scaffold1038_size22408.3	301	1	Bidirectional sugar transporter SWEET	GO:0005887 GO:0015770 GO:0008515 GO:0034219 GO:0051119	NULL	U
evm.model.scaffold1038_size22408.2	386	1	protein RETICULATA-RELATED 3, chloroplastic-like	GO:0009793 GO:0048366 GO:0009941 GO:0000302 GO:0009648 GO:0016021	NULL	S
evm.model.scaffold103_size665001.129	444	1	Guanosine nucleotide diphosphate dissociation inhibitor	GO:0005093 GO:0007264 GO:0015031 GO:0050790 GO:0016740	NULL	O
evm.model.scaffold103_size665001.1	91	1	Non-specific lipid-transfer protein	GO:0008289 GO:0006869	NULL	T
evm.model.scaffold103_size665001.198	414	1	basic proline-rich protein-like	GO:0006396 GO:2000028	NULL	S
evm.model.scaffold103_size665001.144	603	1	beta-glucosidase BoGH3B-like	GO:0008184 GO:0009251 GO:0030170 GO:0004338 GO:0102499 GO:0102250 GO:0005886 GO:0005764 GO:0102483	Glycogen_phosphorylase;Beta-glucosidase;Glucan_1,3-beta-glucosidase	G
evm.model.scaffold103_size665001.71	649	1	Uncharacterized protein	noGO	NULL	S
evm.model.scaffold103_size665001.123	547	1	hypothetical protein	noGO	NULL	S
evm.model.scaffold103_size665001.155	285	1	Uncharacterized protein	noGO	NULL	S
evm.model.scaffold103_size665001.199	263	1	GPN-loop GTPase 3	GO:0005525 GO:0016787	NULL	K
evm.model.scaffold103_size665001.154	582	1	Phosphoinositide phospholipase C	GO:0004435 GO:0048015 GO:0032959 GO:0016042 GO:0051209 GO:0005886	Phospholipase_C;Phosphoinositide_phospholipase_C	I
evm.model.scaffold103_size665001.85	151	1	hypothetical protein	noGO	NULL	S
evm.model.scaffold103_size665001.76	239	1	protein MAIN-LIKE 1-like	noGO	NULL	S
evm.model.scaffold103_size665001.9	268	1	Uncharacterized protein	noGO	NULL	L
evm.model.scaffold103_size665001.47	572	1	hypothetical protein	noGO	NULL	S
evm.model.scaffold103_size665001.125	385	1	vacuolar amino acid transporter 1	GO:0015171 GO:0003333	NULL	E
evm.model.scaffold103_size665001.148	567	1	hypothetical protein	noGO	NULL	S
evm.model.scaffold103_size665001.150	567	1	anthranilate synthase alpha subunit 2, chloroplastic-like isoform X1	GO:0009507 GO:0000162 GO:0005950 GO:0004049	Anthranilate_synthase	E
evm.model.scaffold103_size665001.117	91	1	hypothetical protein	noGO	NULL	S
evm.model.scaffold103_size665001.6	241	1	Expansin	GO:0005576 GO:0005618 GO:0016020 GO:0009826 GO:0080022	NULL	S
evm.model.scaffold103_size665001.116	248	1	Uncharacterized protein	noGO	NULL	L
evm.model.scaffold103_size665001.109	206	1	Uncharacterized protein	noGO	NULL	L
evm.model.scaffold103_size665001.156	310	1	probable pyridoxal 5-phosphate synthase subunit PDX1	GO:0042823 GO:0036381	Pyridoxal_5-phosphate_synthase_(glutamine_hydrolyzing)	H
evm.model.scaffold103_size665001.158	141	Singleton	ATP-dependent DNA helicase	noGO	NULL	none
evm.model.scaffold103_size665001.2	427	1	vacuolar amino acid transporter 1-like isoform X1	GO:0016021 GO:0015171 GO:0005774 GO:0003333 GO:0005886	NULL	E
evm.model.scaffold103_size665001.173	522	1	Aldehyde dehydrogenase family 2 member C4	GO:0004029 GO:0001758 GO:0009699 GO:0055114 GO:0050269	Retinal_dehydrogenase;Coniferyl-aldehyde_dehydrogenase;Aldehyde_dehydrogenase_(NAD(P)(+));Aldehyde_dehydrogenase_(NAD(+))	C
evm.model.scaffold103_size665001.4	769	1	Starch synthase, chloroplastic/amyloplastic	GO:0009507 GO:0010021 GO:0019252 GO:0009011 GO:0004373	Starch_synthase;Glycogen(starch)_synthase	H
evm.model.scaffold103_size665001.152	414	1	serine/threonine-protein phosphatase 7 long form homolog	noGO	NULL	S
evm.model.scaffold103_size665001.3	484	1	Pentatricopeptide repeat-containing protein	GO:0090305 GO:0003723 GO:0005515 GO:0009451 GO:0004519 GO:0043231	NULL	S
evm.model.scaffold103_size665001.136	224	3	Serine/threonine-protein phosphatase 7 long form	noGO	NULL	S
evm.model.scaffold103_size665001.142	254	1	Serine/threonine-protein phosphatase 7 long form-like	noGO	NULL	T
evm.model.scaffold103_size665001.146	735	1	Uncharacterized protein	noGO	NULL	L
evm.model.scaffold103_size665001.10	124	1	hypothetical protein	noGO	NULL	S
evm.model.scaffold103_size665001.174	270	1	strigolactone esterase D14-like	noGO	NULL	S
evm.model.scaffold103_size665001.126	368	1	15-cis-zeta-carotene isomerase, chloroplastic	GO:0009507 GO:0016120 GO:0016021 GO:0090471	NULL	S
evm.model.scaffold103_size665001.118	104	1	hypothetical protein	noGO	NULL	S
evm.model.scaffold103_size665001.145	292	1	transcription factor DIVARICATA-like	GO:0003677 GO:0048262	NULL	K
evm.model.scaffold103_size665001.82	97	1	Uncharacterized protein	noGO	NULL	T
evm.model.scaffold103_size665001.95	589	1	ATP-dependent DNA helicase	GO:0003677 GO:0005524 GO:0070035 GO:0005737 GO:0032508 GO:0000724 GO:0009378 GO:0005694 GO:0043138 GO:0042631 GO:0070417	Adenosinetriphosphatase;DNA_helicase;Nucleoside-triphosphate_phosphatase	L
evm.model.scaffold103_size665001.141	260	3	Serine/threonine-protein phosphatase 7 long form	noGO	NULL	S
evm.model.scaffold103_size665001.100	94	1	hypothetical protein	noGO	NULL	S
evm.model.scaffold103_size665001.112	240	1	hypothetical protein	noGO	NULL	S
evm.model.scaffold103_size665001.77	368	1	Uncharacterized protein (Fragment)	noGO	NULL	S
evm.model.scaffold103_size665001.185	554	1	Uncharacterized protein	noGO	NULL	S
evm.model.scaffold103_size665001.87	238	Singleton	39S ribosomal protein L45, mitochondrial isoform X1	GO:0005840	NULL	J
evm.model.scaffold103_size665001.151	203	1	Peptidyl-prolyl cis-trans isomerase	GO:0016018 GO:0009507 GO:0005802 GO:0003755 GO:0009506 GO:0016020 GO:0005829 GO:0051082 GO:0000413 GO:0005771 GO:0042026 GO:0005795	Peptidylprolyl_isomerase	O
evm.model.scaffold103_size665001.131	251	1	Putative mitochondrial protein (Fragment)	GO:0003824	NULL	E
evm.model.scaffold103_size665001.157	407	Singleton	Transcription initiation factor TFIID subunit 15b	GO:0009507 GO:0003676	NULL	A
evm.model.scaffold103_size665001.8	133	1	hypothetical protein	noGO	NULL	S
evm.model.scaffold103_size665001.83	272	1	hypothetical protein	noGO	NULL	S
evm.model.scaffold103_size665001.162	426	1	protochlorophyllide-dependent translocon component 52, chloroplastic-like	GO:0009941 GO:0016021 GO:0032441 GO:0055114 GO:0010277 GO:0051537 GO:0009987	Acting_on_single_donors_with_incorporation_of_molecular_oxygen_(oxygenases)._The_oxygen_incorporated_need_not_be_derived_from_O(2);Chlorophyllide_a_oxygenase;Pheophorbide_a_oxygenase	P
evm.model.scaffold103_size665001.84	115	1	hypothetical protein	noGO	NULL	S
evm.model.scaffold103_size665001.181	230	1	hypothetical protein	noGO	NULL	S
evm.model.scaffold103_size665001.143	450	1	Glycosyltransferase	GO:0016758	NULL	CG
evm.model.scaffold1040_size21852.8	532	3	Serine/threonine-protein kinase RIO1	GO:0030490 GO:0034708 GO:2000234 GO:0005829 GO:0030688 GO:0005654 GO:0004674 GO:0005524 GO:0006468	Transferring_phosphorus-containing_groups	DT
evm.model.scaffold1041_size21800.8	235	1	probable membrane-associated kinase regulator 2	GO:0005886	NULL	S
evm.model.scaffold1041_size21800.5	244	1	Peroxygenase-like	GO:0009793 GO:0004392 GO:0006952 GO:0031090 GO:0005811 GO:0004601 GO:1990137 GO:0005509 GO:0031408 GO:0098869 GO:0016021 GO:0034389 GO:0055114 GO:0071614	Acting_on_paired_donors,_with_incorporation_or_reduction_of_molecular_oxygen._The_oxygen_incorporated_need_not_be_derived_from_O(2);Plant_seed_peroxygenase;Peroxidase	S
evm.model.scaffold1041_size21800.1	182	1	probable WRKY transcription factor 14	GO:0003700 GO:0009793 GO:0009555 GO:0006355 GO:0043565	NULL	K
evm.model.scaffold1041_size21800.4	374	1	Zinc finger protein CONSTANS-LIKE 4	GO:0009909 GO:0009416 GO:0005515	NULL	K
evm.model.scaffold1042_size21777.4	259	1	early nodulin-like protein 2	GO:0031224 GO:0044464 GO:0009055	NULL	S
evm.model.scaffold1042_size21777.2	91	1	protein NUCLEAR FUSION DEFECTIVE 6, chloroplastic/mitochondrial-like isoform X2	GO:0000741	NULL	S
evm.model.scaffold1042_size21777.5	355	1	Dihydroorotase, mitochondrial	GO:0009507 GO:0006207 GO:0004151 GO:0006221	Dihydroorotase	F
evm.model.scaffold1042_size21777.1	321	1	transcription activator GLK1	GO:0003700 GO:0045893 GO:1900056 GO:0010380 GO:0010638 GO:0009658 GO:0009910 GO:0003677	NULL	K
evm.model.scaffold1042_size21777.3	212	1	Ethylene-responsive transcription factor 4	GO:0003677 GO:0003700 GO:0006355 GO:0006950 GO:0009725	NULL	K
evm.model.scaffold1043_size21697.2	207	3	Glycosyl transferase, family 14 protein	GO:0008375 GO:0016021	NULL	S
evm.model.scaffold1043_size21697.4	326	1	F-box protein FBW2-like	noGO	NULL	S
evm.model.scaffold1044_size21641.3	360	1	Probable magnesium transporter	GO:0005769 GO:0016021 GO:0015095 GO:1903830 GO:0005886	NULL	P
evm.model.scaffold1046_size21631.2	547	4	Plant regulator RWP-RK	GO:0051302 GO:0003700 GO:0006355	NULL	K
evm.model.scaffold1046_size21631.3	408	4	Malate dehydrogenase, chloroplastic	GO:0009570 GO:0009409 GO:0005975 GO:0030060 GO:0006108 GO:0009793 GO:0009941 GO:0006099 GO:0008746 GO:0005774 GO:0009735	NAD(P)(+)_transhydrogenase_(Si-specific);Malate_dehydrogenase	C
evm.model.scaffold1047_size21624.3	166	1	hypothetical protein	noGO	NULL	S
evm.model.scaffold1047_size21624.8	126	1	Putative 39S ribosomal L53, mitochondrial	GO:0005840	NULL	S
evm.model.scaffold1048_size21377.1	273	1	Putative transcription repressor PLATZ family	GO:0008270	NULL	S
evm.model.scaffold1049_size21338.2	280	1	Ethylene-responsive transcription factor 4	GO:0003677 GO:0003700 GO:0006355	NULL	K
evm.model.scaffold104_size664890.89	211	4	Serine/arginine repetitive matrix protein	noGO	NULL	none
evm.model.scaffold104_size664890.78	408	4	Protein trichome birefringence-like 25	GO:0071554 GO:0016413 GO:0016020	NULL	S
evm.model.scaffold104_size664890.177	296	1	putative uridine kinase C227.14 isoform X1	GO:0005524 GO:0006206 GO:0009507 GO:0043097 GO:0046132 GO:0004849 GO:0006222 GO:0004594 GO:0016310 GO:0016787	Uridine_kinase;Pantothenate_kinase	FH
evm.model.scaffold104_size664890.86	225	Singleton	Putative pre-16S rRNA nuclease	GO:0000967 GO:0016740 GO:0016787	NULL	G
evm.model.scaffold104_size664890.94	148	Singleton	Mucin-5AC like	noGO	NULL	none
evm.model.scaffold104_size664890.98	337	1	glyoxylate/succinic semialdehyde reductase 2, chloroplastic	GO:0009570 GO:0050661 GO:0051287 GO:0055114 GO:0030267	Glyoxylate_reductase_(NADP(+))	I
evm.model.scaffold104_size664890.137	224	4	protein MKS1-like	GO:0009870	NULL	S
evm.model.scaffold104_size664890.66	522	1	O-acyltransferase	GO:0006071 GO:0010030 GO:0009651 GO:0009793 GO:0009941 GO:0045995 GO:0004144 GO:0007568 GO:0005789 GO:0005811 GO:0009409 GO:0009749 GO:0009737 GO:0019432 GO:0016021 GO:0098827	Diacylglycerol_O-acyltransferase	I
evm.model.scaffold104_size664890.109	422	Singleton	cell cycle checkpoint control protein RAD9A	GO:0006281 GO:0019901 GO:0090305 GO:0042826 GO:1902231 GO:0008853 GO:0005654 GO:0008408 GO:0000076 GO:0005737 GO:0071479 GO:0031573 GO:0017124 GO:0030896	Acting_on_ester_bonds;Acting_on_ester_bonds;Exodeoxyribonuclease_III	DL
evm.model.scaffold104_size664890.168	247	4	protein YLS9-like	GO:0016020	NULL	S
evm.model.scaffold104_size664890.6	475	1	pentatricopeptide repeat-containing protein At2g21090-like	GO:0090305 GO:0003723 GO:0005515 GO:0009451 GO:0004519 GO:0043231	NULL	S
evm.model.scaffold104_size664890.13	433	1	Malate dehydrogenase	GO:0009570 GO:0030060 GO:0006101 GO:0009941 GO:0006099 GO:0046554 GO:0008746 GO:0009579 GO:0051775 GO:0005975 GO:0006734 GO:0006107 GO:0006108 GO:0046496 GO:0019674	NAD(P)(+)_transhydrogenase_(Si-specific);Malate_dehydrogenase;Malate_dehydrogenase_(NADP(+))	C
evm.model.scaffold104_size664890.132	391	4	Putative SMAD/FHA domain-containing protein	GO:0003729 GO:0005515	NULL	S
evm.model.scaffold104_size664890.163	544	4	Serine/threonine-protein kinase Nek2	GO:0005524 GO:0050794 GO:0006468 GO:0004674	Transferring_phosphorus-containing_groups	T
evm.model.scaffold104_size664890.25	449	1	Tubulin alpha chain	GO:0005525 GO:0051301 GO:0005737 GO:0003924 GO:0005200 GO:0000226 GO:0000278 GO:0005874	Nucleoside-triphosphate_phosphatase	Z
evm.model.scaffold104_size664890.155	355	4	Serine/threonine protein kinase	GO:0042802 GO:0019903 GO:0090333 GO:0009651 GO:0046777 GO:1902456 GO:0004674 GO:0042742 GO:0005985 GO:0009789 GO:0009414 GO:0005524 GO:0009739 GO:0006636 GO:0071244 GO:0048366 GO:0071485 GO:2000377 GO:0019432 GO:0005829 GO:0010029 GO:0010359 GO:0035556	Transferring_phosphorus-containing_groups	T
evm.model.scaffold104_size664890.5	208	1	cold shock protein 2	GO:0003676 GO:0008270	NULL	J
evm.model.scaffold104_size664890.2	421	1	beta-amyrin 28-oxidase-like	GO:0005506 GO:0007275 GO:0016021 GO:0016132 GO:0016709 GO:0055114 GO:0016135 GO:0006722 GO:0016125 GO:0010268 GO:0020037	Acting_on_paired_donors,_with_incorporation_or_reduction_of_molecular_oxygen._The_oxygen_incorporated_need_not_be_derived_from_O(2)	Q
evm.model.scaffold104_size664890.146	434	1	Floral homeotic protein APETALA 2	GO:0003677 GO:0003700 GO:0010093 GO:0010073 GO:0048316 GO:0006355 GO:0048481	NULL	K
evm.model.scaffold104_size664890.134	484	4	trihelix transcription factor GT-2-like	GO:0003700 GO:0006355 GO:0003677	NULL	K
evm.model.scaffold104_size664890.120	259	4	Anamorsin homolog	GO:0005758 GO:0046872 GO:0009055 GO:0051539 GO:0022900 GO:0051537 GO:0016226	NULL	S
evm.model.scaffold104_size664890.82	2460	Singleton	WD repeat containing protein	GO:0043291 GO:0070072 GO:0007035 GO:0005515	NULL	S
evm.model.scaffold104_size664890.92	87	Singleton	Putative JAB1/MPN/MOV34 metalloenzyme domain-containing protein	GO:0045739 GO:0004843 GO:0031593 GO:0070552 GO:0072425 GO:0000502 GO:0070531 GO:0070537 GO:0008237 GO:0006302 GO:0010212	Ubiquitinyl_hydrolase_1	O
evm.model.scaffold104_size664890.4	284	1	basic leucine zipper 23-like	GO:0003700 GO:0010043 GO:0006355 GO:0043565	NULL	K
evm.model.scaffold104_size664890.74	413	Singleton	Enhanced ethylene response protein 5	GO:0090267 GO:0003690 GO:0048536 GO:0000502 GO:0043488 GO:0009873 GO:0060968 GO:0000973 GO:0070390 GO:0006368 GO:0003723 GO:0045893 GO:0071033 GO:0043066 GO:0035327 GO:2000117 GO:0016973	NULL	D
evm.model.scaffold104_size664890.113	332	4	Protein WVD2-like 1	noGO	NULL	S
evm.model.scaffold104_size664890.106	432	1	Ap-3 complex subunit mu	GO:0099003 GO:0016021 GO:0030131 GO:0009630 GO:0006886 GO:0097480 GO:0048490	NULL	U
evm.model.scaffold104_size664890.154	903	4	CDPK-related kinase 5-like	GO:0046777 GO:0004683 GO:0005886 GO:0009931 GO:0020037 GO:0042744 GO:0004601 GO:0005524 GO:0006979 GO:0005516 GO:0009738 GO:0005737 GO:0005509 GO:0055114 GO:0018105 GO:0035556	Transferring_phosphorus-containing_groups;Calcium/calmodulin-dependent_protein_kinase;Peroxidase	T
evm.model.scaffold104_size664890.153	210	4	Eukaryotic initiation factor 4A	GO:0003700 GO:0003743 GO:0004386 GO:0043565 GO:0006355 GO:0006413	Adenosinetriphosphatase;Nucleoside-triphosphate_phosphatase	J
evm.model.scaffold104_size664890.20	201	1	GTPase Rab5/YPT51	GO:0005525 GO:0005769 GO:0010009 GO:0003924 GO:0032482 GO:0045022 GO:0005829 GO:0006886	Nucleoside-triphosphate_phosphatase	U
evm.model.scaffold104_size664890.170	167	4	methyl-CpG-binding domain-containing protein 5-like	GO:0010370 GO:0043621 GO:0008327 GO:0005720 GO:0005731 GO:0019899	NULL	BK
evm.model.scaffold104_size664890.91	420	4	Biotin/lipoyl attachment	GO:0003887 GO:0003964 GO:0003723 GO:0090501 GO:0032197 GO:0006508 GO:0000943 GO:0006278 GO:0004540 GO:0008233	RNA-directed_DNA_polymerase;DNA-directed_DNA_polymerase	L
evm.model.scaffold104_size664890.176	411	1	aspartic proteinase-like protein 2	GO:0004190 GO:0030163 GO:0006508 GO:0016021 GO:0046658	Acting_on_peptide_bonds_(peptidases)	O
evm.model.scaffold104_size664890.140	803	4	Mitogen-activated protein kinase kinase kinase YODA-like	GO:0006979 GO:0005524 GO:0031098 GO:0005737 GO:0046777 GO:0004709 GO:0007346	Mitogen-activated_protein_kinase_kinase_kinase;Transferring_phosphorus-containing_groups	T
evm.model.scaffold104_size664890.96	433	4	DNA-directed RNA polymerase subunit beta	GO:0005802 GO:0016021 GO:0003899 GO:0016301 GO:0016746 GO:0016310 GO:0032774	DNA-directed_RNA_polymerase	none
evm.model.scaffold104_size664890.104	165	1	protein C2-DOMAIN ABA-RELATED 4-like	GO:1901002 GO:0005096 GO:1902479 GO:0009611 GO:0005829 GO:0005543 GO:0005886 GO:0009789 GO:0043547	NULL	S
evm.model.scaffold104_size664890.156	198	4	Reticulon-like protein	GO:0071782 GO:0071458 GO:0071786	NULL	U
evm.model.scaffold104_size664890.80	1742	4	protein TSS	GO:0005515	NULL	S
evm.model.scaffold104_size664890.138	440	4	chromatin assembly factor 1 subunit FAS2-like	GO:0008283 GO:0042393 GO:0033186 GO:0048366 GO:0031507 GO:0000724 GO:0009555 GO:0009933 GO:0006334 GO:0010026	NULL	BL
evm.model.scaffold104_size664890.152	1144	4	Pentatricopeptide repeat-containing protein	GO:0090305 GO:0003723 GO:0009451 GO:0004519 GO:0043231 GO:0005515	NULL	S
evm.model.scaffold104_size664890.125	400	4	probable protein phosphatase 2C 47	GO:0004724 GO:0046872 GO:0006470	Protein-serine/threonine_phosphatase	T
evm.model.scaffold104_size664890.93	317	Singleton	Lys-63-specific deubiquitinase BRCC36	GO:0045739 GO:0004843 GO:0031593 GO:0070552 GO:0072425 GO:0000502 GO:0070531 GO:0070537 GO:0008237 GO:0006302 GO:0010212	Ubiquitinyl_hydrolase_1	O
evm.model.scaffold104_size664890.179	327	4	Serine-threonine kinase receptor-associated protein	GO:0005515 GO:0016301 GO:0016310	NULL	I
evm.model.scaffold104_size664890.142	195	4	Nuclear transcription factor Y subunit B-7-like	GO:0050793 GO:0003700 GO:0046982 GO:0045893 GO:0043565	NULL	K
evm.model.scaffold104_size664890.70	128	1	hypothetical protein	noGO	NULL	S
evm.model.scaffold104_size664890.157	597	4	L-ascorbate oxidase	GO:0005507 GO:0080167 GO:0016021 GO:0055114 GO:0008447	Acting_on_diphenols_and_related_substances_as_donors;L-ascorbate_oxidase	Q
evm.model.scaffold104_size664890.116	1179	4	Phospholipid-transporting ATPase	GO:0000287 GO:0005524 GO:0005548 GO:0140326 GO:0045332 GO:0043492 GO:0016021 GO:0005886	Adenosinetriphosphatase;P-type_phospholipid_transporter;Nucleoside-triphosphate_phosphatase	P
evm.model.scaffold104_size664890.141	210	Singleton	photosystem I reaction center subunit N, chloroplastic-like	GO:0019904 GO:0009522 GO:0009534 GO:0016491 GO:0015979 GO:0055114	NULL	S
evm.model.scaffold104_size664890.19	259	1	V-type proton ATPase subunit D-like	GO:0005774 GO:0005886 GO:0016787 GO:0042626 GO:0055085	NULL	C
evm.model.scaffold104_size664890.110	363	1	E3 ubiquitin-protein ligase ATL31-like	noGO	NULL	O
evm.model.scaffold104_size664890.121	400	4	Pectin acetylesterase	GO:0009506 GO:0052793 GO:0016021 GO:0005829 GO:0071555 GO:0005576 GO:0005886	Carboxylesterase	M
evm.model.scaffold104_size664890.136	594	4	Hexosyltransferase	GO:0005978 GO:0010417 GO:0016020 GO:0008466 GO:0005829 GO:0080116 GO:0009834	Glucuronosyltransferase;Glycogenin_glucosyltransferase	G
evm.model.scaffold104_size664890.122	337	4	trihelix transcription factor GT-3b-like	GO:0016592 GO:0005730 GO:0000981 GO:0006357 GO:0003677	NULL	K
evm.model.scaffold104_size664890.34	105	1	hypothetical protein	noGO	NULL	S
evm.model.scaffold104_size664890.149	110	4	hypothetical protein	noGO	NULL	S
evm.model.scaffold104_size664890.135	536	4	Autophagy-related protein 13	GO:0000045 GO:0016020 GO:1990316	NULL	U
evm.model.scaffold104_size664890.173	114	4	Stress-response A/B barrel domain-containing protein	GO:0009507	NULL	S
evm.model.scaffold104_size664890.85	1840	Singleton	vacuolar protein sorting-associated protein 8 homolog	GO:0005769 GO:0033263 GO:0034058 GO:0005515	NULL	U
evm.model.scaffold104_size664890.67	426	1	Cyclin-L1-1	GO:0045737 GO:1901409 GO:0009506 GO:0016538 GO:0009651 GO:0000307 GO:0045944	NULL	D
evm.model.scaffold104_size664890.83	158	1	ORM1-like protein 2	GO:0005789 GO:0016021	NULL	S
evm.model.scaffold104_size664890.76	253	1	hypothetical protein	noGO	NULL	S
evm.model.scaffold104_size664890.126	259	4	WUSCHEL-related homeobox 8	GO:0003700 GO:0006355 GO:0003677	NULL	K
evm.model.scaffold104_size664890.158	494	4	Geraniol 10-hydroxylase	GO:0005789 GO:0036202 GO:0005506 GO:0102811 GO:0070330 GO:0016021 GO:0016099 GO:0055114 GO:0051502 GO:0020037	Unspecific_monooxygenase;Geraniol_8-hydroxylase;Acting_on_paired_donors,_with_incorporation_or_reduction_of_molecular_oxygen._The_oxygen_incorporated_need_not_be_derived_from_O(2);Acting_on_paired_donors,_with_incorporation_or_reduction_of_molecular_oxygen._The_oxygen_incorporated_need_not_be_derived_from_O(2);Acting_on_paired_donors,_with_incorporation_or_reduction_of_molecular_oxygen._The_oxyge…	Q
evm.model.scaffold104_size664890.29	189	2	transcription initiation factor TFIID subunit 7	GO:0035067 GO:0035035 GO:0033276 GO:0044212 GO:0006413 GO:0045944 GO:0006469 GO:0046966 GO:0000122 GO:0003743 GO:0051123 GO:0005669 GO:0003713 GO:0046982 GO:0042809 GO:0030520 GO:0071339	NULL	K
evm.model.scaffold104_size664890.151	2243	4	Actin filament-coating protein tropomyosin	noGO	NULL	none
evm.model.scaffold104_size664890.27	189	2	transcription initiation factor TFIID subunit 7	GO:0035067 GO:0035035 GO:0033276 GO:0044212 GO:0006413 GO:0045944 GO:0006469 GO:0046966 GO:0000122 GO:0003743 GO:0051123 GO:0005669 GO:0003713 GO:0046982 GO:0042809 GO:0030520 GO:0071339	NULL	K
evm.model.scaffold104_size664890.129	414	4	protein POLLENLESS 3-LIKE 2-like	GO:0009507 GO:0005515	NULL	S
evm.model.scaffold104_size664890.81	1062	4	Bifunctional fucokinase/fucose pyrophosphorylase	GO:0047341 GO:0005524 GO:0050201 GO:0042352 GO:0016310	Fucose-1-phosphate_guanylyltransferase;Fucokinase	G
evm.model.scaffold104_size664890.128	416	4	G2/mitotic-specific cyclin-2-like	GO:0019901 GO:0005813 GO:0016538 GO:0007088 GO:0005737 GO:0008284 GO:0000307 GO:0045787 GO:0004672 GO:0000079	NULL	D
evm.model.scaffold104_size664890.165	237	4	beta-carotene isomerase D27, chloroplastic-like	GO:0009507 GO:0005506 GO:0016859 GO:1901601 GO:0010223	NULL	S
evm.model.scaffold104_size664890.150	303	4	red chlorophyll catabolite reductase, chloroplastic	GO:0009570 GO:0010363 GO:0009814 GO:0009941 GO:0005829 GO:0055114 GO:0051743 GO:0009535 GO:0015996	NULL	S
evm.model.scaffold104_size664890.127	189	4	Zinc finger protein ZAT3	GO:0003700 GO:0006355 GO:0003676	NULL	S
evm.model.scaffold104_size664890.107	483	1	acyl-coenzyme A oxidase 4, peroxisomal	GO:0003995 GO:0006635 GO:0003997 GO:0009793 GO:0050660 GO:0005829 GO:0009514 GO:0046459	Acting_on_the_CH-CH_group_of_donors;Acyl-CoA_oxidase	E
evm.model.scaffold104_size664890.77	578	4	Putative indole-3-acetic acid-amido synthetase GH3.12	GO:0009585 GO:0009694 GO:0010193 GO:0080123 GO:0009611 GO:0009733 GO:0005524 GO:0009627 GO:0010119 GO:0070566 GO:2000377 GO:0102057 GO:0102058 GO:0102053 GO:0031348	NULL	S
evm.model.scaffold104_size664890.87	413	1	CBS domain-containing protein CBSX6	GO:0016301 GO:0016310	NULL	C
evm.model.scaffold104_size664890.174	1011	4	AP-2 complex subunit alpha	GO:0072583 GO:0035615 GO:0030122 GO:0006886	NULL	U
evm.model.scaffold104_size664890.178	656	4	Methylcrotonoyl-CoA carboxylase subunit alpha, mitochondrial (Fragment)	GO:0005524 GO:0009507 GO:0005759 GO:0016020 GO:0006552 GO:0004485 GO:0050897	Methylcrotonoyl-CoA_carboxylase	C
evm.model.scaffold104_size664890.167	155	4	Ribosomal protein L11	GO:0003735 GO:0032543 GO:0000027 GO:0070180 GO:0005762	NULL	J
evm.model.scaffold104_size664890.90	493	1	BRCA1-associated protein	GO:0061630 GO:0008270 GO:0042802 GO:0007265 GO:0008139 GO:0031965 GO:0009968 GO:0043130 GO:0000151 GO:0046982 GO:0005829 GO:0010029 GO:0016567	NULL	O
evm.model.scaffold104_size664890.33	139	1	Uncharacterized protein	noGO	NULL	S
evm.model.scaffold104_size664890.31	146	1	Uncharacterized protein	noGO	NULL	L
evm.model.scaffold104_size664890.147	281	1	Protein kinase, ATP binding site-containing protein	GO:0005524 GO:0031098 GO:0005938 GO:0032147 GO:0046777 GO:0009653 GO:0043622 GO:0004674 GO:0023014 GO:0007346	Transferring_phosphorus-containing_groups	T
evm.model.scaffold104_size664890.166	421	4	dnaJ protein homolog	GO:0005829 GO:0005524 GO:0031072 GO:0046872 GO:0051082 GO:0006457 GO:0009408	NULL	O
evm.model.scaffold104_size664890.111	457	Singleton	protein AUXIN RESPONSE 4	GO:0009926 GO:0005774 GO:0009612 GO:0009733	NULL	S
evm.model.scaffold104_size664890.148	399	4	Uncharacterized protein	noGO	NULL	none
evm.model.scaffold104_size664890.68	124	1	hypothetical protein	noGO	NULL	S
evm.model.scaffold104_size664890.73	520	1	hypothetical protein	noGO	NULL	S
evm.model.scaffold104_size664890.171	352	4	F-box protein	GO:0016020 GO:0019005 GO:0019218 GO:0005515	NULL	S
evm.model.scaffold104_size664890.112	337	1	GDSL esterase/lipase	GO:0016788	NULL	S
evm.model.scaffold104_size664890.124	446	4	SRSF protein kinase 1-like	GO:0005524 GO:0050684 GO:0004712 GO:0005737 GO:0004674 GO:0006468 GO:0035556 GO:0000245	Transferring_phosphorus-containing_groups;Dual-specificity_kinase	T
evm.model.scaffold104_size664890.133	332	4	WD repeat-containing protein 82-B	GO:0005737 GO:0048188 GO:0003682 GO:0005515 GO:0042800 GO:0009827 GO:0080182	Histone-lysine_N-methyltransferase	ABO
evm.model.scaffold104_size664890.139	505	4	BTB/POZ domain-containing protein	noGO	NULL	S
evm.model.scaffold104_size664890.108	82	1	40S ribosomal protein S21	GO:0000461 GO:0003735 GO:0000447 GO:0006412	NULL	J
evm.model.scaffold104_size664890.99	191	4	Mitochondrial inner membrane translocase subunit Tim17/Tim22/Tim23/peroxisomal protein PMP24	GO:0005744 GO:0031305 GO:0030150 GO:0015450 GO:0008565	Mitochondrial_protein-transporting_ATPase;Chloroplast_protein-transporting_ATPase	U
evm.model.scaffold104_size664890.105	465	1	Thaumatin-like protein	GO:0006952	NULL	O
evm.model.scaffold104_size664890.21	599	1	vacuolar amino acid transporter 1-like	GO:0016021 GO:0015171 GO:0005774 GO:0003333	NULL	E
evm.model.scaffold104_size664890.131	307	4	Chalcone-flavanone isomerase family protein	noGO	NULL	S
evm.model.scaffold104_size664890.32	266	1	hypothetical protein	noGO	NULL	S
evm.model.scaffold1050_size21304.2	3306	1	BEACH domain-containing protein B isoform X1	GO:0005515	NULL	U
evm.model.scaffold1051_size21287.3	944	1	Cysteine synthase	GO:0030170 GO:0005507 GO:0016491 GO:0005737 GO:0016829 GO:0055114 GO:0004124 GO:0006535	Cysteine_synthase	E
evm.model.scaffold1052_size21236.2	3306	1	BEACH domain-containing protein B isoform X1	GO:0005515	NULL	U
evm.model.scaffold1053_size21173.3	105	4	NADH dehydrogenase [ubiquinone] 1 beta subcomplex subunit 10-B	GO:0005747 GO:0008137 GO:0055114	NADH:ubiquinone_reductase_(H(+)-translocating);Acting_on_NADH_or_NADPH;NADH_dehydrogenase	C
evm.model.scaffold1053_size21173.6	343	4	Mediator of rna polymerase ii transcription subunit 22a	GO:0003712 GO:0016592 GO:0006357	NULL	K
evm.model.scaffold1053_size21173.7	425	4	Protein O-GlcNAc transferase	GO:0016757 GO:0016020	NULL	S
evm.model.scaffold1053_size21173.2	385	4	Agmatine deiminase	GO:0004668 GO:0016020 GO:0009446 GO:0047632	Agmatine_deiminase;Protein-arginine_deiminase	E
evm.model.scaffold1053_size21173.5	476	4	Ribosomal protein L34Ae	GO:0016020	NULL	S
evm.model.scaffold1054_size21101.6	309	1	Serine/threonine-protein phosphatase	GO:0004722 GO:0000164 GO:0046872 GO:0006470	Protein-serine/threonine_phosphatase	T
evm.model.scaffold1054_size21101.5	398	1	F-box/kelch-repeat protein At5g26960	GO:0031463 GO:0005515	NULL	S
evm.model.scaffold1054_size21101.1	1602	1	DDT domain-containing protein PTM	GO:0000122 GO:0006338 GO:0045893 GO:0005737 GO:0043565 GO:0007420 GO:0008134 GO:0016589 GO:0005654	NULL	BK
evm.model.scaffold1055_size21087.6	335	4	Transcription initiation factor TFIID subunit 14b	GO:0090239 GO:0003743 GO:0035267 GO:0009909 GO:0048510 GO:0043981 GO:0006355 GO:0006413 GO:2000028 GO:0009733	NULL	K
evm.model.scaffold1055_size21087.4	172	4	Peptidyl-prolyl cis-trans isomerase	GO:0016018 GO:0009507 GO:0003755 GO:0009506 GO:0007165 GO:0005829 GO:0051082 GO:0000413 GO:0042026 GO:0005774 GO:0005886	Peptidylprolyl_isomerase	O
evm.model.scaffold1055_size21087.7	1110	4	Zinc finger CCCH domain-containing protein 19	GO:0003677 GO:0042393 GO:0046872 GO:0005829 GO:0008168 GO:0010964 GO:0005840 GO:0032776	NULL	K
evm.model.scaffold1056_size21079.2	488	1	plant intracellular Ras-group-related LRR protein 9-like	GO:0030029 GO:0005912 GO:0045199 GO:0007043 GO:0007165 GO:0005737 GO:0015031 GO:0048557 GO:0045108 GO:0016323 GO:0005515	NULL	S
evm.model.scaffold1056_size21079.3	691	1	DENN domain and WD repeat-containing protein SCD1	GO:2000060 GO:1903146 GO:1902410 GO:1903026 GO:0050816 GO:0045741 GO:0001570 GO:0005730 GO:1901800 GO:0045824 GO:0005654 GO:0003700 GO:0009825 GO:0051443 GO:0097027 GO:0034644 GO:2001205 GO:0019005 GO:0010235 GO:0030324 GO:0007062 GO:0042802 GO:0090049 GO:1903378 GO:0006355 GO:0006974 GO:0005886 GO:0080008 GO:1903955 GO:0031648 GO:1990452 GO:0004842 GO:0048471 GO:0031625 GO:0007219 GO:0051053 GO:…	NULL	T
evm.model.scaffold1057_size21027.1	184	1	Cytochrome b-c1 complex subunit 7	GO:0009150 GO:0009167 GO:0034551 GO:0008121 GO:0017144 GO:0005750 GO:0006122 GO:0005774 GO:0009060 GO:0009536 GO:0009205	Acting_on_diphenols_and_related_substances_as_donors;Acting_on_diphenols_and_related_substances_as_donors	C
evm.model.scaffold1059_size20906.2	209	1	E3 ubiquitin-protein ligase RING1-like	GO:0061630 GO:0071629 GO:0090378 GO:0000209 GO:0005829 GO:0051787 GO:0061635 GO:0051865	NULL	O
evm.model.scaffold105_size659173.118	329	1	Uridine nucleosidase 1	GO:0006218 GO:0006152 GO:0072585 GO:0005829 GO:0047622 GO:0047724 GO:0045437	Ribosylpyrimidine_nucleosidase;Adenosine_nucleosidase;Inosine_nucleosidase;Purine_nucleosidase;Uridine_nucleosidase	F
evm.model.scaffold105_size659173.9	280	1	Cytochrome P450	GO:0006807 GO:0043170 GO:0044237 GO:0044238	NULL	E
evm.model.scaffold105_size659173.96	167	1	putative oligosaccharyltransferase complex subunit CG9662	GO:0005886 GO:0008250 GO:0016021 GO:0016740	NULL	S
evm.model.scaffold105_size659173.136	639	1	Auxin response factor	GO:0003677 GO:0005515 GO:0006355 GO:0009725	NULL	K
evm.model.scaffold105_size659173.79	1397	4	Pentatricopeptide repeat-containing protein	GO:0090305 GO:0008270 GO:0003723 GO:0005515 GO:0009793 GO:0043231 GO:0009451 GO:0004519 GO:0016021	NULL	S
evm.model.scaffold105_size659173.95	392	1	protein CHLOROPLAST IMPORT APPARATUS 2-like	GO:0006355 GO:0045036 GO:0005515	NULL	K
evm.model.scaffold105_size659173.87	170	1	Mitochondrial/chloroplast ribosomal protein S19	GO:0005515 GO:0003735 GO:0015935 GO:0006412	NULL	J
evm.model.scaffold105_size659173.41	718	4	Acetyl-coenzyme a carboxylase carboxyl transferase subunit alpha, chloroplastic	GO:0009570 GO:0016020 GO:0009941 GO:0003989 GO:0006633 GO:0016740 GO:0009317	Acetyl-CoA_carboxylase	I
evm.model.scaffold105_size659173.69	217	1	transcription repressor OFP13-like	GO:0045892	NULL	S
evm.model.scaffold105_size659173.16	242	1	Uncharacterized protein	noGO	NULL	S
evm.model.scaffold105_size659173.23	365	1	Membrane-associated kinase regulator	noGO	NULL	none
evm.model.scaffold105_size659173.33	560	3	Dnaj protein erdj3a	GO:0005788 GO:0009506 GO:0034605 GO:0009860 GO:0016491 GO:0055114	NULL	O
evm.model.scaffold105_size659173.68	182	4	transcription repressor OFP6-like	GO:0045892 GO:0005737 GO:1900457	NULL	S
evm.model.scaffold105_size659173.86	391	1	zinc finger protein JACKDAW-like isoform X1	GO:0003676 GO:0003700	NULL	S
evm.model.scaffold105_size659173.71	1424	Singleton	Transcription initiation factor TFIID subunit 2	GO:0008270 GO:0000989 GO:0000988 GO:0044212 GO:0001129 GO:0043565 GO:0003682 GO:0045944 GO:0008237 GO:0051123 GO:0001132 GO:0001076 GO:0005669 GO:0009506 GO:0006508 GO:0140110	NULL	K
evm.model.scaffold105_size659173.52	234	1	transcription factor bHLH35-like isoform X2	GO:0003700 GO:0006355 GO:0046983	NULL	K
evm.model.scaffold105_size659173.143	430	1	protein GPR107-like	GO:0032050 GO:0072583 GO:0005769 GO:0030136 GO:0005654 GO:0016021	NULL	T
evm.model.scaffold105_size659173.129	203	4	Ras-related protein RABC2a	GO:0005525 GO:0005777 GO:0003924 GO:0032482 GO:0080115 GO:0006886 GO:0005886 GO:0030742	Nucleoside-triphosphate_phosphatase	U
evm.model.scaffold105_size659173.113	386	1	Glutaredoxin-related protein	GO:0005886 GO:0015035 GO:0009055 GO:0045454 GO:0055114	NULL	O
evm.model.scaffold105_size659173.158	433	4	WD repeat-containing 63	noGO	NULL	none
evm.model.scaffold105_size659173.39	256	Singleton	8-amino-7-oxononanoate synthase	GO:0009507 GO:0016020	NULL	none
evm.model.scaffold105_size659173.34	385	4	ERBB-3 BINDING PROTEIN 1	GO:0015995 GO:0046408 GO:0007275 GO:0045597 GO:0004177 GO:0006364 GO:0044843 GO:0005730 GO:0009735 GO:0005886 GO:0009734 GO:0051302 GO:0003677 GO:0003700 GO:0003723 GO:0031625 GO:0045892 GO:0001558 GO:0005737 GO:0043066 GO:0006508 GO:0016021 GO:1990904	Acting_on_peptide_bonds_(peptidases);Chlorophyll_synthase	J
evm.model.scaffold105_size659173.109	210	1	transcription repressor OFP13-like	GO:0045892	NULL	S
evm.model.scaffold105_size659173.36	582	1	phosphoinositide phosphatase SAC8-like isoform X1	GO:0005789 GO:0043812 GO:0016021 GO:0098827 GO:0046856	NULL	I
evm.model.scaffold105_size659173.147	253	1	Sanguinarine reductase	GO:0009570 GO:0005507 GO:0042742 GO:0009579	NULL	G
evm.model.scaffold105_size659173.156	562	4	Proline and serine-rich protein	noGO	NULL	S
evm.model.scaffold105_size659173.17	312	1	hypothetical protein	noGO	NULL	S
evm.model.scaffold105_size659173.67	1224	1	Tetratricopeptide-like helical	GO:0000407 GO:0031410 GO:1990072 GO:0005515 GO:0006888 GO:0030242 GO:0032258 GO:0034497	NULL	D
evm.model.scaffold105_size659173.42	121	4	auxin-responsive protein SAUR72-like	GO:0030307 GO:0005737 GO:0019897 GO:0009733	NULL	S
evm.model.scaffold105_size659173.65	407	1	RING-type E3 ubiquitin transferase	GO:0004842 GO:0005829 GO:0010200 GO:0009414 GO:0051865	NULL	H
evm.model.scaffold105_size659173.98	755	Singleton	nucleolar MIF4G domain-containing protein 1	GO:0008283 GO:0009793 GO:0009555 GO:0045787 GO:0080008 GO:0005677 GO:0009507 GO:0006349 GO:0009909 GO:0048366 GO:0031507 GO:2000653 GO:0010026 GO:0016020 GO:0003723 GO:0005515	NULL	T
evm.model.scaffold105_size659173.120	358	1	Basic-leucine zipper domain-containing protein	GO:0003700 GO:0006355	NULL	K
evm.model.scaffold105_size659173.47	212	1	Putative fe-S cluster assembly protein DRE2-like	noGO	NULL	S
evm.model.scaffold105_size659173.6	683	2	Putative LRR receptor-like serine/threonine-protein kinase	GO:0005524 GO:0016021 GO:0004674 GO:0006468 GO:0005886	Transferring_phosphorus-containing_groups	T
evm.model.scaffold105_size659173.43	918	4	Kinesin-like protein	GO:0016887 GO:0043515 GO:1902410 GO:0009555 GO:0005871 GO:0007112 GO:0007018 GO:0000775 GO:0005874 GO:0008017 GO:0005524 GO:0003777 GO:0009506 GO:0010245 GO:0090307	Adenosinetriphosphatase;Nucleoside-triphosphate_phosphatase	Z
evm.model.scaffold105_size659173.94	237	3	transcription factor bHLH35-like isoform X2	GO:0003700 GO:0006355 GO:0046983	NULL	K
evm.model.scaffold105_size659173.110	108	4	Anion exchange protein like	noGO	NULL	none
evm.model.scaffold105_size659173.108	726	1	Bel1-like homeodomain protein 1	GO:0003677 GO:0003700 GO:0042803 GO:0009737 GO:0046982 GO:0005737 GO:0009610 GO:0006355 GO:0010201	NULL	K
evm.model.scaffold105_size659173.57	157	1	Putative phosphatidylglycerol/phosphatidylinositol transfer protein DDB_G0282179	GO:0032366	NULL	S
evm.model.scaffold105_size659173.135	1063	1	putative white-brown complex homolog protein 30	GO:0005524 GO:0009506 GO:0015709 GO:0043492 GO:1902358 GO:0016021 GO:0015419 GO:0102025 GO:0015405 GO:0005886	Adenosinetriphosphatase;Acting_on_acid_anhydrides;ABC-type_sulfate_transporter;Nucleoside-triphosphate_phosphatase	Q
evm.model.scaffold105_size659173.161	320	4	Peroxidase	GO:0005576 GO:0004601 GO:0020037 GO:0046872 GO:0006979 GO:0042744 GO:0055114 GO:0098869	Peroxidase	Q
evm.model.scaffold105_size659173.107	261	1	protein YLS9-like	GO:0009506 GO:0016021 GO:0046658	NULL	S
evm.model.scaffold105_size659173.121	452	1	IQ domain-containing protein	GO:0005515	NULL	none
evm.model.scaffold105_size659173.152	579	1	nucleobase-ascorbate transporter 1	GO:0055085 GO:0009506 GO:0022857 GO:0016021	NULL	F
evm.model.scaffold105_size659173.83	579	4	uncharacterized membrane protein YMR155W-like	GO:0016021 GO:0055085	NULL	S
evm.model.scaffold105_size659173.111	296	1	B3 domain-containing protein	GO:0003677 GO:0003700 GO:0045892 GO:0010073 GO:0080167	NULL	K
evm.model.scaffold105_size659173.15	449	1	translation initiation factor eIF-2B subunit beta-like isoform X1	GO:0005525 GO:0005851 GO:0003743 GO:0006413 GO:0016853	NULL	J
evm.model.scaffold105_size659173.50	273	1	Xyloglucan endotransglucosylase/hydrolase	GO:0005618 GO:0071555 GO:0004553 GO:0016762 GO:0010411 GO:0042546	Xyloglucan:xyloglucosyl_transferase	G
evm.model.scaffold105_size659173.21	100	Singleton	Transmembrane protein, putative	GO:0016020	NULL	none
evm.model.scaffold105_size659173.22	1399	1	enhancer of mRNA-decapping protein 4-like	GO:0042803 GO:0071365 GO:0007186 GO:0010071 GO:0031087 GO:0010072 GO:0003729 GO:0000932 GO:0005829 GO:0009965 GO:0005654	NULL	S
evm.model.scaffold105_size659173.133	559	1	RNA polymerase sigma factor	GO:0003700 GO:0006355 GO:0006352 GO:0009536	NULL	K
evm.model.scaffold105_size659173.160	687	3	Cation/H(+) antiporter 3-like	GO:0015299 GO:1902600 GO:0016021	NULL	P
evm.model.scaffold105_size659173.139	533	1	WD repeat-containing protein 20-like	GO:0045013 GO:0005515	NULL	S
evm.model.scaffold105_size659173.40	705	1	Pentatricopeptide repeat-containing protein	GO:0090305 GO:0003723 GO:0009451 GO:0004519 GO:0043231 GO:0005509 GO:0005515	NULL	S
evm.model.scaffold105_size659173.8	122	1	Cysteine-rich receptor-like protein kinase (Fragment)	GO:0016772 GO:0016787 GO:0140097 GO:0006259	NULL	KL
evm.model.scaffold105_size659173.80	556	Singleton	Purine-uracil permease NCS1	GO:0015851 GO:0055085 GO:0016021 GO:0043100 GO:0009526 GO:0005886 GO:0015205 GO:0019856	NULL	FH
evm.model.scaffold105_size659173.138	501	1	Ubiquitin--protein ligase	GO:0008270 GO:0016020 GO:0016874	NULL	A
evm.model.scaffold105_size659173.27	315	1	Peroxidase	GO:0005576 GO:0016021 GO:0004601 GO:0020037 GO:0046872 GO:0006979 GO:0042744 GO:0055114 GO:0098869	Peroxidase	Q
evm.model.scaffold105_size659173.127	246	1	Peptidylprolyl isomerase	GO:0003755 GO:0000413 GO:0009535	Peptidylprolyl_isomerase	O
evm.model.scaffold105_size659173.77	372	4	RAB6-interacting golgin	noGO	NULL	S
evm.model.scaffold105_size659173.89	562	3	L-type lectin-domain containing receptor kinase VIII.1-like	GO:0005886 GO:0005524 GO:0016021 GO:0004674 GO:0006468 GO:0030246	Transferring_phosphorus-containing_groups	T
evm.model.scaffold105_size659173.45	902	4	Pollen receptor-like kinase 1	GO:0005524 GO:0005515 GO:0004674 GO:0009846 GO:0006468 GO:0016324 GO:0080092 GO:0090406	Transferring_phosphorus-containing_groups	T
evm.model.scaffold105_size659173.153	678	1	G1/S-specific cyclin-E protein	GO:0016020	NULL	none
evm.model.scaffold105_size659173.132	363	1	Heavy metal-associated domain, HMA	GO:0046916 GO:0005507 GO:0005737 GO:0030001	NULL	P
evm.model.scaffold105_size659173.70	146	1	Ubiquitin-conjugating enzyme e2 variant 1d	GO:0061630 GO:0016746 GO:0031625 GO:0061631 GO:0005829 GO:0004839 GO:0070534 GO:0006301	E1_ubiquitin-activating_enzyme	O
evm.model.scaffold105_size659173.88	452	3	L-type lectin-domain containing receptor kinase VIII.1-like	GO:0005524 GO:0002229 GO:0006468 GO:0030246 GO:0042742 GO:0005886 GO:0004675	Transferring_phosphorus-containing_groups	T
evm.model.scaffold105_size659173.128	325	1	vacuolar protein-sorting-associated protein 37 homolog 1-like	GO:0000813 GO:0015031 GO:0032509	NULL	U
evm.model.scaffold105_size659173.131	1259	1	ABC transporter B family member 1	GO:0042626 GO:0008361 GO:0009637 GO:0008559 GO:0005886 GO:0009624 GO:0060919 GO:0009926 GO:0005524 GO:0009958 GO:0006855 GO:0009506 GO:0010329 GO:0043481 GO:0043492 GO:0010328 GO:0048443 GO:0016021 GO:0015408 GO:0042908 GO:0010315 GO:0015405	Adenosinetriphosphatase;ABC-type_xenobiotic_transporter;ABC-type_Fe(3+)_transporter;Nucleoside-triphosphate_phosphatase	Q
evm.model.scaffold105_size659173.35	130	1	AMP deaminase	GO:0031307 GO:0009737 GO:0009167 GO:0009793 GO:0005829 GO:0043424	NULL	F
evm.model.scaffold105_size659173.93	237	3	transcription factor bHLH35-like isoform X2	GO:0003700 GO:0006355 GO:0046983	NULL	K
evm.model.scaffold105_size659173.85	708	1	Phenylalanine ammonia-lyase	GO:0009739 GO:0006559 GO:0005737 GO:0046898 GO:0032991 GO:0045548 GO:0016598 GO:0009800	Phenylalanine_ammonia-lyase;Phenylalanine/tyrosine_ammonia-lyase	H
evm.model.scaffold105_size659173.137	972	1	serine/threonine-protein kinase-like protein CCR1	GO:0005524 GO:0042803 GO:0016021 GO:0007178 GO:0006468 GO:0005886 GO:0004675	Transferring_phosphorus-containing_groups	G
evm.model.scaffold105_size659173.142	296	Singleton	Ribonuclease P protein subunit p29	GO:0090501 GO:0000172 GO:0030681 GO:0004540 GO:0006364 GO:0001682 GO:0033204	NULL	A
evm.model.scaffold105_size659173.84	276	1	29 kDa ribonucleoprotein A, chloroplastic-like	GO:0009570 GO:0009737 GO:0045087 GO:0009941 GO:0003729 GO:1901259 GO:0009631 GO:0008266 GO:1990904 GO:0043489 GO:0009535	NULL	A
evm.model.scaffold105_size659173.73	764	4	Cell division protein FtsZ	GO:0010020 GO:0051301 GO:0009570 GO:0005525 GO:0042802 GO:0003735 GO:0003924 GO:0009534 GO:0042651 GO:0005840 GO:0043621 GO:0006412	Nucleoside-triphosphate_phosphatase	D
evm.model.scaffold105_size659173.151	570	1	importin subunit alpha-like	GO:0000221 GO:0005515 GO:0046961	NULL	S
evm.model.scaffold105_size659173.148	164	1	Transmembrane protein	noGO	NULL	none
evm.model.scaffold105_size659173.81	264	4	Putative thaumatin	GO:0006952	NULL	S
evm.model.scaffold105_size659173.141	360	1	Glycosyltransferases	GO:0010417 GO:0042285 GO:0000139 GO:0098791 GO:0009834 GO:0015018	Glucuronosyltransferase;Galactosylgalactosylxylosylprotein_3-beta-glucuronosyltransferase	O
evm.model.scaffold105_size659173.130	396	Singleton	zinc finger HIT domain-containing protein 2 isoform X1	GO:0016020 GO:0046872	NULL	S
evm.model.scaffold105_size659173.154	606	4	DEAD-box ATP-dependent RNA helicase 53-like	GO:0009651 GO:0039694 GO:0008186 GO:0005730 GO:0044215 GO:0009414 GO:0009409 GO:0003677 GO:0005524 GO:0000373 GO:0003723 GO:0003724 GO:0070035 GO:0019034 GO:0005618 GO:0010501 GO:0018995	Adenosinetriphosphatase;RNA_helicase;Nucleoside-triphosphate_phosphatase	A
evm.model.scaffold105_size659173.112	378	1	Rho GTPase-activating protein 5-like	GO:0034059 GO:0007165	NULL	T
evm.model.scaffold105_size659173.100	417	1	ALK tyrosine kinase receptor scd-2 like	GO:0005829 GO:0016301 GO:0002098 GO:0016310 GO:0017183	NULL	none
evm.model.scaffold105_size659173.134	195	1	Transcription factor tcp11	GO:0003700 GO:0006355 GO:0043565 GO:0042752	NULL	K
evm.model.scaffold105_size659173.53	115	1	macrophage migration inhibitory factor homolog	GO:0009507 GO:0050178	Phenylpyruvate_tautomerase	V
evm.model.scaffold105_size659173.72	633	1	putative pentatricopeptide repeat-containing protein At3g11460	GO:0090305 GO:0008270 GO:0003723 GO:0005515 GO:0004519 GO:0016020 GO:0016554	NULL	S
evm.model.scaffold105_size659173.64	239	4	Ndr1hin1-like protein 3	GO:0016021	NULL	S
evm.model.scaffold105_size659173.63	460	4	Sucrose-phosphatase 1	GO:0016757 GO:0000287 GO:0050307 GO:0005986 GO:0016311	Sugar-phosphatase;Sucrose-phosphate_phosphatase	S
evm.model.scaffold105_size659173.20	252	Singleton	F-box protein SKIP5	GO:0005515 GO:0016829	NULL	S
evm.model.scaffold105_size659173.54	1177	Singleton	carbamoyl-phosphate synthase large chain, chloroplastic-like	GO:0009570 GO:0005524 GO:0006526 GO:0046872 GO:0000050 GO:0016020 GO:0004087 GO:0006541 GO:0004088 GO:0016740 GO:0016036 GO:0005951	Carbamoyl-phosphate_synthase_(glutamine-hydrolyzing);Carbamoyl-phosphate_synthase_(ammonia)	EF
evm.model.scaffold105_size659173.56	1115	4	Ubiquitin carboxyl-terminal hydrolase 12	GO:0016579 GO:0004843 GO:0005515 GO:0009506 GO:0003690 GO:0005829 GO:0006265 GO:0009867 GO:0006511	Ubiquitinyl_hydrolase_1	O
evm.model.scaffold105_size659173.61	290	1	hypothetical protein	noGO	NULL	S
evm.model.scaffold105_size659173.66	2133	Singleton	Protein virilizer	noGO	NULL	AT
evm.model.scaffold105_size659173.97	809	1	protein RRP6-like 2	GO:0090503 GO:1904872 GO:0080188 GO:1902466 GO:0009048 GO:0005730 GO:0000166 GO:0003676 GO:0000176 GO:0000175 GO:0000460 GO:0071035 GO:0071044 GO:0071034 GO:0035327 GO:0005829 GO:0071048 GO:0032211	Acting_on_ester_bonds;Acting_on_ester_bonds	J
evm.model.scaffold105_size659173.60	263	1	hypothetical protein	noGO	NULL	S
evm.model.scaffold105_size659173.162	154	4	Mastermind-like protein	noGO	NULL	none
evm.model.scaffold105_size659173.119	369	1	GDSL esterase/lipase	GO:0016020 GO:0016788	NULL	S
evm.model.scaffold105_size659173.149	753	Singleton	Putative poly [ADP-ribose] polymerase 4-like	noGO	NULL	S
evm.model.scaffold105_size659173.150	695	1	Ubiquitin fusion degradation protein UFD1	GO:0090502 GO:0003676 GO:0004523 GO:0046872 GO:0006511	Acting_on_ester_bonds;Acting_on_ester_bonds;Ribonuclease_H	AO
evm.model.scaffold105_size659173.124	444	1	Enolase	GO:0009651 GO:0006096 GO:0046686 GO:0009416 GO:0005740 GO:0000015 GO:0005886 GO:0004634 GO:0000287 GO:0009409 GO:0003677 GO:0009507 GO:0009506 GO:0009737 GO:0005507	Phosphopyruvate_hydratase	G
evm.model.scaffold1061_size20708.2	705	1	DNA mismatch repair protein MSH4	GO:0005524 GO:0043073 GO:0009506 GO:0010777 GO:0030983 GO:0007129 GO:0000794	NULL	L
evm.model.scaffold1062_size20698.2	207	1	Lob domain-containing protein 42	noGO	NULL	S
evm.model.scaffold1062_size20698.1	244	1	zinc finger protein JAGGED-like	GO:0010097 GO:0003676 GO:0003700 GO:0048653 GO:0008285 GO:0010094 GO:0006355 GO:0009965 GO:0010158	NULL	S
evm.model.scaffold1063_size20688.1	246	1	Auxin-responsive protein	GO:0003700 GO:0005515 GO:0006355 GO:0009734	NULL	K
evm.model.scaffold1063_size20688.5	179	1	Non-specific lipid-transfer protein-like protein	GO:0006869 GO:0008289 GO:0046658	NULL	O
evm.model.scaffold1064_size20511.1	890	1	Protein CHROMATIN REMODELING 8	GO:0005524 GO:0008094 GO:0006283 GO:0001208 GO:0010767 GO:0010332	Adenosinetriphosphatase;Nucleoside-triphosphate_phosphatase	KL
evm.model.scaffold1064_size20511.2	508	1	sn1-specific diacylglycerol lipase beta	GO:0046340 GO:0047372 GO:0042136 GO:0019369 GO:0005886	Acylglycerol_lipase;Carboxylesterase	IOT
evm.model.scaffold1064_size20511.6	178	1	Flap endonuclease	GO:0004519 GO:0090305	NULL	S
evm.model.scaffold1064_size20511.5	411	1	Shaggy-related protein kinase alpha	GO:0090502 GO:0003676 GO:0004523 GO:0005524 GO:0042538 GO:1901002 GO:0046777 GO:0005829 GO:0004674 GO:0009933	Acting_on_ester_bonds;Transferring_phosphorus-containing_groups;Acting_on_ester_bonds;Ribonuclease_H	T
evm.model.scaffold1065_size20386.6	262	1	uncharacterized protein LOC106757853	noGO	NULL	S
evm.model.scaffold1065_size20386.3	128	1	Uncharacterized protein	noGO	NULL	E
evm.model.scaffold1065_size20386.7	240	1	hypothetical protein	noGO	NULL	S
evm.model.scaffold1065_size20386.1	884	1	Importin beta-like sad2	GO:0005635 GO:0007165 GO:0006606 GO:0005829 GO:0008565 GO:0035280 GO:0008536 GO:0005215	NULL	UY
evm.model.scaffold1067_size19649.2	414	1	Cysteine-rich receptor-like protein kinase 10	GO:0018108 GO:0005524 GO:0004715 GO:0004709 GO:0042742 GO:0005886	Mitogen-activated_protein_kinase_kinase_kinase;Transferring_phosphorus-containing_groups;Transferring_phosphorus-containing_groups;Non-specific_protein-tyrosine_kinase	T
evm.model.scaffold1069_size19513.5	309	1	L-arabinose transport system permease protein like	noGO	NULL	none
evm.model.scaffold1069_size19513.2	122	1	pentatricopeptide repeat-containing protein At5g65560-like	GO:0005515	NULL	S
evm.model.scaffold1069_size19513.3	90	1	LYR motif-containing protein 4	noGO	NULL	A
evm.model.scaffold106_size656854.27	152	1	Ubiquitin-conjugating enzyme E2 2	GO:0005524 GO:0016874 GO:0061631 GO:0000209 GO:0006281 GO:0043161	NULL	O
evm.model.scaffold106_size656854.48	444	1	Tubulin beta chain	GO:0016757 GO:0090378 GO:0005200 GO:0009741 GO:0000226 GO:0000278 GO:0005874 GO:0005525 GO:0009739 GO:0005737 GO:0048366 GO:0003924 GO:0070542	Nucleoside-triphosphate_phosphatase	Z
evm.model.scaffold106_size656854.67	110	1	hypothetical protein	noGO	NULL	S
evm.model.scaffold106_size656854.41	489	3	26S proteasome regulatory complex, subunit PSMD10	GO:0034394 GO:0006182 GO:0036371 GO:1901021 GO:0004383 GO:0060307 GO:0006468 GO:0030507 GO:0048522 GO:0098910 GO:0005829 GO:0031430 GO:0036309 GO:0086046 GO:0019901 GO:0033292 GO:0086005 GO:0003283 GO:0043034 GO:0004674 GO:0044325 GO:1901018 GO:0030018 GO:0001653 GO:0030315 GO:0006888 GO:0045087 GO:0010628 GO:0014704 GO:2001259 GO:0086091 GO:0070972 GO:0031347 GO:0050821 GO:0010881 GO:0016323 GO:…	Transferring_phosphorus-containing_groups;Guanylate_cyclase	S
evm.model.scaffold106_size656854.154	1563	1	protein NETWORKED 1D-like	GO:0005886 GO:0003779	NULL	S
evm.model.scaffold106_size656854.39	238	3	26S proteasome regulatory complex, subunit PSMD10	GO:0034394 GO:0006182 GO:0036371 GO:1901021 GO:0004383 GO:0060307 GO:0006468 GO:0030507 GO:0048522 GO:0098910 GO:0005829 GO:0031430 GO:0036309 GO:0086046 GO:0019901 GO:0033292 GO:0086005 GO:0003283 GO:0043034 GO:0004674 GO:0044325 GO:1901018 GO:0030018 GO:0001653 GO:0030315 GO:0006888 GO:0045087 GO:0010628 GO:0014704 GO:2001259 GO:0086091 GO:0070972 GO:0031347 GO:0050821 GO:0010881 GO:0016323 GO:…	Transferring_phosphorus-containing_groups;Guanylate_cyclase	S
evm.model.scaffold106_size656854.46	429	3	Histone acetyltransferase	GO:0006281 GO:0000790 GO:0045892 GO:0042393 GO:0043981 GO:0045944 GO:0043995 GO:2000028 GO:0010224 GO:0000123	Arylamine_N-acetyltransferase;Histone_acetyltransferase	B
evm.model.scaffold106_size656854.52	334	1	Nuclear pore complex protein NUP35	GO:0044615 GO:0031965 GO:0006999 GO:0006607 GO:0006355 GO:0005543 GO:0051028 GO:0003697 GO:0044613	NULL	D
evm.model.scaffold106_size656854.145	190	1	hypothetical protein	noGO	NULL	S
evm.model.scaffold106_size656854.106	170	1	peptidyl-prolyl cis-trans isomerase E	GO:0016018 GO:0008143 GO:0016607 GO:0006283 GO:0006355 GO:0043312 GO:0000413 GO:0005576 GO:0000398 GO:1904813 GO:0003755 GO:0003729 GO:0071007 GO:0005829 GO:0034774 GO:0045070	Peptidylprolyl_isomerase	A
evm.model.scaffold106_size656854.28	520	1	hypothetical protein	noGO	NULL	S
evm.model.scaffold106_size656854.178	803	1	DEAD-box ATP-dependent RNA helicase 3, chloroplastic	GO:0009570 GO:0008270 GO:0009651 GO:0008186 GO:0009941 GO:0042254 GO:0005730 GO:0009658 GO:0005524 GO:0000373 GO:0003724 GO:0070035 GO:0016020 GO:0010501 GO:0003729	Adenosinetriphosphatase;RNA_helicase;Nucleoside-triphosphate_phosphatase	A
evm.model.scaffold106_size656854.2	108	1	hypothetical protein	noGO	NULL	S
evm.model.scaffold106_size656854.128	429	1	rhodanese-like domain-containing protein 8, chloroplastic isoform X1	GO:0016021 GO:0016740	NULL	S
evm.model.scaffold106_size656854.170	188	1	hypothetical protein	noGO	NULL	S
evm.model.scaffold106_size656854.147	200	1	Uncharacterized protein	noGO	NULL	L
evm.model.scaffold106_size656854.42	624	4	homeobox protein BEL1 homolog	GO:0003677 GO:0003700 GO:0009506 GO:0005829 GO:0006355	NULL	K
evm.model.scaffold106_size656854.148	115	1	hypothetical protein	noGO	NULL	S
evm.model.scaffold106_size656854.50	314	4	NDR1/HIN1-Like protein	GO:0016021 GO:0003899 GO:0032774	DNA-directed_RNA_polymerase	none
evm.model.scaffold106_size656854.172	945	1	probable leucine-rich repeat receptor-like protein kinase At5g49770	GO:0005524 GO:0005515 GO:0016021 GO:0004674 GO:0006468	Transferring_phosphorus-containing_groups	T
evm.model.scaffold106_size656854.166	94	3	Wound-responsive family protein	noGO	NULL	S
evm.model.scaffold106_size656854.117	158	1	hypothetical protein	noGO	NULL	S
evm.model.scaffold106_size656854.66	113	1	hypothetical protein	noGO	NULL	S
evm.model.scaffold106_size656854.26	145	1	serine/threonine-protein phosphatase 7 long form homolog	noGO	NULL	S
evm.model.scaffold106_size656854.136	223	1	Uncharacterized protein	noGO	NULL	O
evm.model.scaffold106_size656854.152	365	1	Isocitrate dehydrogenase [NAD] subunit, mitochondrial	GO:0000287 GO:0005524 GO:0009507 GO:0008270 GO:0004449 GO:0051287 GO:0006101 GO:0006102 GO:0006099	Isocitrate_dehydrogenase_(NAD(+))	E
evm.model.scaffold106_size656854.60	660	1	Uncharacterized protein	noGO	NULL	S
evm.model.scaffold106_size656854.76	148	1	DNA/RNA polymerases superfamily protein	GO:0003676 GO:0043170 GO:0008270 GO:0003824 GO:0006807 GO:0044238	NULL	JKL
evm.model.scaffold106_size656854.47	166	Singleton	BnaA01g13000D protein	noGO	NULL	S
evm.model.scaffold106_size656854.89	442	1	aspartic proteinase CDR1-like	GO:0004190 GO:0030163 GO:0006508	Acting_on_peptide_bonds_(peptidases)	O
evm.model.scaffold106_size656854.44	143	1	Copper transporter 6	GO:0006878 GO:0015089 GO:0016021 GO:0098705 GO:0046658	NULL	P
evm.model.scaffold106_size656854.31	101	1	hypothetical protein	noGO	NULL	S
evm.model.scaffold106_size656854.177	154	1	hypothetical protein	noGO	NULL	S
evm.model.scaffold106_size656854.23	135	1	Uncharacterized protein (Fragment)	noGO	NULL	S
evm.model.scaffold106_size656854.55	380	4	Inositol oxygenase	GO:0050113 GO:0005506 GO:0005737 GO:0019310 GO:0055114	Inositol_oxygenase	S
evm.model.scaffold106_size656854.57	826	1	Pentatricopeptide repeat-containing protein	GO:0090305 GO:0008270 GO:0003723 GO:0005515 GO:0009451 GO:0004519 GO:0043231	NULL	S
evm.model.scaffold106_size656854.153	102	1	Transmembrane protein	noGO	NULL	none
evm.model.scaffold106_size656854.38	226	2	26S proteasome regulatory complex, subunit PSMD10	GO:0034394 GO:0006182 GO:0036371 GO:1901021 GO:0004383 GO:0060307 GO:0006468 GO:0030507 GO:0048522 GO:0098910 GO:0005829 GO:0031430 GO:0036309 GO:0086046 GO:0019901 GO:0033292 GO:0086005 GO:0003283 GO:0043034 GO:0004674 GO:0044325 GO:1901018 GO:0030018 GO:0001653 GO:0030315 GO:0006888 GO:0045087 GO:0010628 GO:0014704 GO:2001259 GO:0086091 GO:0070972 GO:0031347 GO:0050821 GO:0010881 GO:0016323 GO:…	Transferring_phosphorus-containing_groups;Guanylate_cyclase	S
evm.model.scaffold106_size656854.51	170	4	Avr9/Cf-9 rapidly elicited protein 146	noGO	NULL	S
evm.model.scaffold106_size656854.149	79	1	Transmembrane protein	GO:0016021	NULL	none
evm.model.scaffold106_size656854.138	255	1	Uncharacterized protein	noGO	NULL	L
evm.model.scaffold106_size656854.118	141	1	hypothetical protein	noGO	NULL	S
evm.model.scaffold106_size656854.176	201	1	uncharacterized protein LOC104227421	noGO	NULL	S
evm.model.scaffold106_size656854.144	218	1	Uncharacterized protein	noGO	NULL	L
evm.model.scaffold106_size656854.40	565	3	26S proteasome regulatory complex, subunit PSMD10	GO:0034394 GO:0006182 GO:0036371 GO:1901021 GO:0004383 GO:0060307 GO:0006468 GO:0030507 GO:0048522 GO:0098910 GO:0005829 GO:0031430 GO:0036309 GO:0086046 GO:0019901 GO:0033292 GO:0086005 GO:0003283 GO:0043034 GO:0004674 GO:0044325 GO:1901018 GO:0030018 GO:0001653 GO:0030315 GO:0006888 GO:0045087 GO:0010628 GO:0014704 GO:2001259 GO:0086091 GO:0070972 GO:0031347 GO:0050821 GO:0010881 GO:0016323 GO:…	Transferring_phosphorus-containing_groups;Guanylate_cyclase	S
evm.model.scaffold106_size656854.127	409	1	lipase-like isoform X1	GO:0016787 GO:0006629	NULL	G
evm.model.scaffold106_size656854.49	461	4	WAT1-related protein	GO:0022857 GO:0016021 GO:0005886	NULL	S
evm.model.scaffold106_size656854.92	281	1	Fatty-acid-binding protein 1	GO:0009570 GO:0005504 GO:0009941 GO:0016872 GO:0006631	NULL	S
evm.model.scaffold106_size656854.68	176	1	hypothetical protein	noGO	NULL	S
evm.model.scaffold106_size656854.151	281	1	Translin family protein isoform 1	GO:0003697 GO:0003723 GO:0043565 GO:0016070	NULL	S
evm.model.scaffold106_size656854.53	131	4	Profilin	GO:0070064 GO:0005546 GO:0042989 GO:0005856 GO:0030845 GO:0005938 GO:0007097 GO:0003785	NULL	Z
evm.model.scaffold106_size656854.54	332	4	protein IQ-DOMAIN 31-like	GO:0005829 GO:0005875 GO:0005886 GO:0005515	NULL	S
evm.model.scaffold106_size656854.14	310	1	Uncharacterized protein (Fragment)	noGO	NULL	S
evm.model.scaffold106_size656854.58	159	1	Putative LOB domain-containing protein	noGO	NULL	S
evm.model.scaffold106_size656854.105	456	1	Uncharacterized protein	noGO	NULL	S
evm.model.scaffold1070_size19467.1	160	1	ethylene-responsive transcription factor 1B-like	GO:0003677 GO:0003700 GO:0006355	NULL	K
evm.model.scaffold1071_size19467.2	366	1	Protein slow green 1, chloroplastic	GO:0005515	NULL	S
evm.model.scaffold1071_size19467.5	339	1	probable F-box protein At1g60180	GO:0005515	NULL	S
evm.model.scaffold1071_size19467.3	88	1	Argininosuccinate lyase	GO:0004180 GO:0016829 GO:0006508	NULL	S
evm.model.scaffold1073_size19364.1	522	1	cytokinin dehydrogenase 6-like	GO:0071949 GO:0016021 GO:0055114 GO:0019139 GO:0009823 GO:0048507 GO:0010103	Cytokinin_dehydrogenase	C
evm.model.scaffold1073_size19364.3	1112	1	protein transport protein SEC31 homolog B-like	GO:0009506 GO:0005515 GO:0005198 GO:0005829 GO:0090110 GO:0070971 GO:0006886 GO:0007029 GO:0030127	NULL	U
evm.model.scaffold1073_size19364.4	554	1	CTL-like protein DDB_G0274487	GO:0016021	NULL	I
evm.model.scaffold1074_size19298.4	680	1	Eceriferum 5 (Fragment)	GO:0005524 GO:0080051 GO:0080172 GO:0042626 GO:0009506 GO:0055085 GO:0009651 GO:0043492 GO:0080167 GO:0016021 GO:0015405 GO:0005886	Adenosinetriphosphatase;Nucleoside-triphosphate_phosphatase	Q
evm.model.scaffold1074_size19298.1	157	1	(R)-specific enoyl-CoA hydratase	noGO	NULL	I
evm.model.scaffold1074_size19298.2	417	1	suppressor of mec-8 and unc-52 protein homolog 2	GO:0007094 GO:0034501 GO:0071005 GO:0000398 GO:0005654	NULL	T
evm.model.scaffold1074_size19298.5	373	1	F-box protein	GO:0009914 GO:0009506 GO:0009736 GO:0016021	NULL	S
evm.model.scaffold1075_size19277.3	133	1	40S ribosomal protein S25-2	GO:0005840	NULL	J
evm.model.scaffold1075_size19277.4	590	1	U2 snRNP auxiliary factor large subunit	GO:0000243 GO:0089701 GO:0030628 GO:0008187 GO:0016607 GO:0046660 GO:0071004 GO:0042742 GO:0000398	NULL	A
evm.model.scaffold1076_size19232.1	646	1	Heat shock cognate 70 kDa protein 2-like	GO:0005737 GO:0005524 GO:0031072 GO:0042623 GO:0044183 GO:0051082 GO:0051787 GO:0034605 GO:0034620 GO:0042026 GO:0051085	Adenosinetriphosphatase;Nucleoside-triphosphate_phosphatase	O
evm.model.scaffold1076_size19232.5	223	1	vacuolar protein sorting-associated protein 2 homolog 1-like	GO:0000815 GO:0015031 GO:0070676 GO:0005771 GO:0007034	NULL	U
evm.model.scaffold1076_size19232.3	860	1	Tubulin--tyrosine ligase-like protein 12	GO:0009507 GO:0005524 GO:0016874 GO:0006464	NULL	O
evm.model.scaffold1077_size19203.1	318	1	Protein trichome birefringence-like 19	GO:0016021	NULL	S
evm.model.scaffold1078_size19161.3	434	1	protein trichome birefringence-like 11	GO:0016021 GO:0016413	NULL	S
evm.model.scaffold1078_size19161.1	101	1	Transmembrane protein	noGO	NULL	S
evm.model.scaffold107_size656107.123	1006	4	Inhibitor of Bruton tyrosine kinase	GO:0005515	NULL	DZ
evm.model.scaffold107_size656107.102	109	1	protein ELF4-LIKE 4-like	GO:0042803 GO:0009649 GO:0042753	NULL	S
evm.model.scaffold107_size656107.40	322	1	Flavonol synthase	GO:0031418 GO:0051555 GO:0045431 GO:0005737 GO:0045486 GO:0046872 GO:0055114	Acting_on_paired_donors,_with_incorporation_or_reduction_of_molecular_oxygen._The_oxygen_incorporated_need_not_be_derived_from_O(2);Flavanone_3-dioxygenase;Acting_on_paired_donors,_with_incorporation_or_reduction_of_molecular_oxygen._The_oxygen_incorporated_need_not_be_derived_from_O(2)	Q
evm.model.scaffold107_size656107.53	235	1	50S ribosomal protein L21, chloroplastic	GO:0009570 GO:0009793 GO:0009941 GO:0004672 GO:0005840 GO:0006468 GO:0009658 GO:0006412 GO:0009409 GO:0005524 GO:0003723 GO:0003735 GO:0005509 GO:0010027	NULL	J
evm.model.scaffold107_size656107.68	104	1	Maturase K (Fragment)	noGO	NULL	S
evm.model.scaffold107_size656107.117	203	1	Serine/threonine-protein phosphatase 7 long form-like	noGO	NULL	S
evm.model.scaffold107_size656107.154	418	2	F5M15.26	GO:0098542 GO:0009684 GO:0016020 GO:0055114 GO:0004497 GO:0019756	NULL	Q
evm.model.scaffold107_size656107.121	418	4	Deoxyhypusine synthase	GO:0005737 GO:0034038 GO:0009553 GO:0008612	Deoxyhypusine_synthase	O
evm.model.scaffold107_size656107.145	317	2	uncharacterized protein LOC104613068	noGO	NULL	L
evm.model.scaffold107_size656107.111	134	1	DUF3511 domain-containing protein	noGO	NULL	S
evm.model.scaffold107_size656107.132	461	4	dihydrolipoyllysine-residue succinyltransferase component of 2-oxoglutarate dehydrogenase complex 2, mitochondrial-like	GO:0006979 GO:0008270 GO:0016020 GO:0004149 GO:0045252 GO:0006099	Dihydrolipoyllysine-residue_succinyltransferase	C
evm.model.scaffold107_size656107.103	224	1	protein BIG GRAIN 1-like A	GO:0009734	NULL	none
evm.model.scaffold107_size656107.64	837	1	Pentatricopeptide repeat-containing protein	GO:0090305 GO:0003723 GO:0009451 GO:0004519 GO:0043231 GO:0005515 GO:0016740	NULL	S
evm.model.scaffold107_size656107.55	391	1	uncharacterized protein LOC104598722	noGO	NULL	L
evm.model.scaffold107_size656107.52	590	1	Malic enzyme	GO:0009051 GO:0051260 GO:0004471 GO:0046686 GO:0004473 GO:0005774 GO:0005886 GO:0009507 GO:0009506 GO:0006108 GO:0046872 GO:0051287 GO:0005618 GO:0019693 GO:0046496 GO:0019682 GO:0005829 GO:0006090	Malate_dehydrogenase_(oxaloacetate-decarboxylating);Malate_dehydrogenase_(decarboxylating);Malate_dehydrogenase_(oxaloacetate-decarboxylating)_(NADP(+))	C
evm.model.scaffold107_size656107.58	210	1	Uncharacterized protein	noGO	NULL	L
evm.model.scaffold107_size656107.41	396	1	Mitogen-activated protein kinase	GO:0010120 GO:0009651 GO:0009574 GO:0010150 GO:0010183 GO:0000746 GO:0009555 GO:0080136 GO:0009620 GO:0042542 GO:0009723 GO:0007049 GO:0009524 GO:0060918 GO:0051301 GO:0005524 GO:0005802 GO:0009737 GO:0010229 GO:0010468 GO:0004707 GO:0050826 GO:0048481 GO:0010224	Transferring_phosphorus-containing_groups;Mitogen-activated_protein_kinase	T
evm.model.scaffold107_size656107.91	113	1	hypothetical protein	noGO	NULL	S
evm.model.scaffold107_size656107.113	327	2	Heat shock transcription factor	GO:0003700 GO:0010286 GO:0005515 GO:0034605 GO:0045893 GO:0044212 GO:0009644 GO:0034620 GO:0043565 GO:0042542 GO:0071456 GO:0010200	NULL	K
evm.model.scaffold107_size656107.70	624	1	hypothetical protein	noGO	NULL	S
evm.model.scaffold107_size656107.136	260	1	60s ribosomal protein l7-4	GO:0000463 GO:0009507 GO:0003735 GO:0002181 GO:0005618 GO:0003729 GO:0005774 GO:0005886 GO:0042788	NULL	J
evm.model.scaffold107_size656107.140	1703	4	Embryogenesis-associated protein emb8	GO:0016020 GO:0016740	NULL	S
evm.model.scaffold107_size656107.169	1476	1	ABC transporter C family member 3	GO:0005774 GO:0016021 GO:0005524 GO:0016887 GO:0042626 GO:0055085	Adenosinetriphosphatase;Nucleoside-triphosphate_phosphatase	Q
evm.model.scaffold107_size656107.38	696	1	Long chain acyl-CoA synthetase 9, chloroplastic	GO:0005524 GO:0003996 GO:0001676 GO:0102391 GO:0016020 GO:0009941 GO:0004467	Long-chain-fatty-acid--CoA_ligase	I
evm.model.scaffold107_size656107.50	391	1	Caffeoylshikimate esterase	GO:0016021 GO:0047372	Acylglycerol_lipase;Carboxylesterase	I
evm.model.scaffold107_size656107.120	122	4	Hydrogen-transporting ATP synthase, rotational mechanism, putative	GO:0000276 GO:0009536 GO:0003743 GO:0015078 GO:0006413 GO:0015986	NULL	S
evm.model.scaffold107_size656107.143	190	1	PAR1-like protein	noGO	NULL	S
evm.model.scaffold107_size656107.112	490	2	IQ domain-containing protein IQM1-like	noGO	NULL	S
evm.model.scaffold107_size656107.155	230	1	hypothetical protein	noGO	NULL	S
evm.model.scaffold107_size656107.139	888	4	Polyphosphoinositide phosphatase	GO:0043812 GO:0007033 GO:0034593 GO:0036092 GO:0005811 GO:0004438 GO:0007626 GO:0009506 GO:0043231 GO:0010008 GO:0010976 GO:0032288 GO:0016311 GO:0031642	Phosphatidylinositol-3-phosphatase	I
evm.model.scaffold107_size656107.27	335	2	hypothetical protein	noGO	NULL	S
evm.model.scaffold107_size656107.135	77	3	Putative ovule protein	noGO	NULL	none
evm.model.scaffold107_size656107.97	270	Singleton	BRISC and BRCA1-A complex member like	GO:0070531 GO:0070552 GO:0045739	NULL	none
evm.model.scaffold107_size656107.21	646	3	Uncharacterized protein	noGO	NULL	S
evm.model.scaffold107_size656107.122	268	4	Nucleic acid binding protein, putative isoform 2	GO:0003723	NULL	A
evm.model.scaffold107_size656107.24	111	1	hypothetical protein	noGO	NULL	S
evm.model.scaffold107_size656107.49	166	1	Protein fatty acid export 1, chloroplastic	GO:0009706 GO:0015245 GO:0055088 GO:1902001 GO:0085029 GO:0071668 GO:0016021	NULL	S
evm.model.scaffold107_size656107.163	132	1	hypothetical protein	noGO	NULL	S
evm.model.scaffold107_size656107.32	214	1	MOB kinase activator-like 1A	GO:0005769 GO:0005802 GO:0005886 GO:0016301 GO:0008283 GO:0009734 GO:0010449 GO:0016310 GO:0035265 GO:0051301	NULL	D
evm.model.scaffold107_size656107.22	402	3	hypothetical protein	noGO	NULL	S
evm.model.scaffold107_size656107.88	239	1	hypothetical protein	noGO	NULL	S
evm.model.scaffold107_size656107.137	265	4	Transmembrane protein	GO:0005886 GO:0005515 GO:0036503	NULL	none
evm.model.scaffold107_size656107.119	329	1	Serine acetyltransferase 5	GO:0009001 GO:0005829 GO:0006535	Serine_O-acetyltransferase	E
evm.model.scaffold107_size656107.35	226	1	hypothetical protein	noGO	NULL	S
evm.model.scaffold107_size656107.133	1371	3	dihydrolipoyllysine-residue succinyltransferase component of 2-oxoglutarate dehydrogenase complex 2, mitochondrial-like	GO:0006979 GO:0008270 GO:0016020 GO:0004149 GO:0045252 GO:0006099	Dihydrolipoyllysine-residue_succinyltransferase	C
evm.model.scaffold107_size656107.33	399	1	Phosphoribulokinase	GO:0009570 GO:0042803 GO:0099080 GO:0009941 GO:0006222 GO:0042742 GO:0009735 GO:0009535 GO:0008974 GO:0009409 GO:0005975 GO:0005524 GO:0006206 GO:0043097 GO:0046132 GO:0004849 GO:0005829 GO:0016310 GO:0019899 GO:0097718	Uridine_kinase;Phosphoribulokinase	TZ
evm.model.scaffold107_size656107.65	1254	Singleton	Mediator of rna polymerase ii transcription subunit 16	GO:0016021 GO:0016592 GO:0006355 GO:0006970 GO:0010104 GO:0032922 GO:1901672 GO:1902066 GO:2000022 GO:2001009	NULL	S
evm.model.scaffold107_size656107.13	104	1	Beta-porphyranase	GO:0003887 GO:0003964 GO:0003723 GO:0090501 GO:0032197 GO:0006508 GO:0000943 GO:0006278 GO:0004540 GO:0008233	RNA-directed_DNA_polymerase;DNA-directed_DNA_polymerase	E
evm.model.scaffold107_size656107.134	77	3	Putative ovule protein	noGO	NULL	none
evm.model.scaffold107_size656107.142	309	4	UVR domain, NTF2-like domain protein	GO:0005515	NULL	S
evm.model.scaffold107_size656107.37	153	1	hypothetical protein	noGO	NULL	S
evm.model.scaffold107_size656107.150	117	1	Uncharacterized protein	GO:0003676 GO:0004523	Acting_on_ester_bonds;Acting_on_ester_bonds;Ribonuclease_H	S
evm.model.scaffold107_size656107.45	585	1	L-gulonolactone oxidase 3	GO:0003885 GO:0071949 GO:0016020 GO:0055114 GO:0050105 GO:0019853	D-arabinono-1,4-lactone_oxidase;L-gulonolactone_oxidase	V
evm.model.scaffold1080_size18956.2	344	1	NAD(P)-binding Rossmann-fold superfamily protein isoform 1	GO:0009507	NULL	none
evm.model.scaffold1080_size18956.4	570	1	Glycosyltransferase family 92 protein	GO:0016020	NULL	S
evm.model.scaffold1080_size18956.5	306	1	Serine/threonine-protein phosphatase	GO:0004722 GO:0005777 GO:0009903 GO:0032000 GO:0006470 GO:0005829 GO:2000012 GO:0005886 GO:0034613 GO:0009788	Protein-serine/threonine_phosphatase	T
evm.model.scaffold1080_size18956.3	752	1	putative pentatricopeptide repeat-containing protein At1g69350, mitochondrial	GO:0005515	NULL	S
evm.model.scaffold1082_size18923.5	334	1	transmembrane protein 33 homolog	GO:0016021	NULL	S
evm.model.scaffold1082_size18923.3	664	1	Pentatricopeptide repeat-containing protein	GO:0090305 GO:0003723 GO:0009451 GO:0004519 GO:0043231 GO:0005515	NULL	S
evm.model.scaffold1083_size18907.1	778	1	Beta-galactosidase 6 (Fragment)	GO:0009341 GO:0005990 GO:0030246 GO:0004565	Beta-galactosidase	G
evm.model.scaffold1083_size18907.2	1143	1	GTP-binding protein BRASSINAZOLE INSENSITIVE PALE GREEN 2, chloroplastic-like	GO:0009570 GO:1904143 GO:0009651 GO:0032297 GO:1902326 GO:0006355 GO:0009742 GO:1901259 GO:0009658 GO:0009646 GO:0005525 GO:0004517 GO:0003924 GO:0055114 GO:0019843 GO:0032502	Nitric-oxide_synthase_(NADPH);Acting_on_paired_donors,_with_incorporation_or_reduction_of_molecular_oxygen._The_oxygen_incorporated_need_not_be_derived_from_O(2);Nucleoside-triphosphate_phosphatase	C
evm.model.scaffold1084_size18896.1	198	1	Homeobox protein ATH1	GO:0010371 GO:0003700 GO:0008285 GO:0006355 GO:0010228 GO:0043565 GO:0090470 GO:0010227	NULL	K
evm.model.scaffold1085_size18595.2	351	1	Programmed cell death protein 2-like	GO:0005737	NULL	S
evm.model.scaffold1085_size18595.3	585	1	Pectinesterase	GO:0045490 GO:0043086 GO:0010119 GO:0045330 GO:0016021 GO:0005886 GO:0042545 GO:0046910 GO:0030599	Pectinesterase;Carboxylesterase	I
evm.model.scaffold1085_size18595.1	456	1	Glucan endo-1,3-beta-D-glucosidase	GO:0005975 GO:0004553	NULL	G
evm.model.scaffold1086_size18182.6	332	1	UDP-galactose/UDP-glucose transporter 3	GO:0015786 GO:0005459 GO:0072334 GO:0030968 GO:0005460 GO:0030173 GO:0030176 GO:0008643 GO:0009555 GO:0009553 GO:0098791 GO:0098827	NULL	P
evm.model.scaffold1086_size18182.2	665	1	probable galactinol--sucrose galactosyltransferase 1	GO:0016757 GO:0010325	NULL	S
evm.model.scaffold1086_size18182.3	535	1	Hexosyltransferase	GO:0005802 GO:0047262 GO:0016021 GO:0000139 GO:0048358 GO:0071555	Polygalacturonate_4-alpha-galacturonosyltransferase	G
evm.model.scaffold1087_size18152.3	265	1	50S ribosomal protein L5, chloroplastic	GO:0009570 GO:0003723 GO:0003735 GO:0016020 GO:0009941 GO:0000027 GO:0009735 GO:0006412	NULL	J
evm.model.scaffold1087_size18152.2	339	1	Transcription initiation factor IIE subunit beta	GO:0000991 GO:0000990 GO:0003677 GO:0003743 GO:0001097 GO:0000988 GO:0005673 GO:0006413 GO:0140110 GO:0006367 GO:0006357	NULL	K
evm.model.scaffold1088_size18135.1	524	1	putative clathrin assembly protein At5g35200	GO:0005886 GO:0048268 GO:0030276 GO:0030136 GO:0005545	NULL	TU
evm.model.scaffold1089_size18110.5	405	1	alpha-1,3/1,6-mannosyltransferase ALG2	GO:0016021 GO:0004378 GO:0006486 GO:0097502	GDP-Man:Man(1)GlcNAc(2)-PP-dolichol_alpha-1,3-mannosyltransferase	M
evm.model.scaffold108_size655003.84	604	1	Uncharacterized protein	noGO	NULL	S
evm.model.scaffold108_size655003.39	489	4	hypothetical protein	noGO	NULL	S
evm.model.scaffold108_size655003.111	581	1	Pentatricopeptide repeat-containing protein	GO:0090305 GO:0008270 GO:0005515 GO:0034046 GO:0019287 GO:0009451 GO:0004519 GO:0050790 GO:0019288 GO:0016125	NULL	S
evm.model.scaffold108_size655003.187	245	1	hypothetical protein	noGO	NULL	S
evm.model.scaffold108_size655003.136	506	4	protein ESKIMO 1-like	GO:0045492 GO:0045893 GO:0016021 GO:1990538 GO:0050826	NULL	S
evm.model.scaffold108_size655003.143	603	1	N-alpha-acetyltransferase 50	GO:0043967 GO:0031415 GO:0034087 GO:0005829 GO:0052858 GO:0071962 GO:0006474 GO:0004596 GO:0010485	Arylamine_N-acetyltransferase;Histone_acetyltransferase;Acyltransferases	S
evm.model.scaffold108_size655003.134	210	4	Alpha/beta hydrolase related protein	noGO	NULL	S
evm.model.scaffold108_size655003.110	208	1	probable NAD(P)H dehydrogenase (Quinone) FQR1-like 3	GO:0010181 GO:0003955 GO:0005737 GO:0009055 GO:0022900 GO:0005886	NAD(P)H_dehydrogenase_(quinone)	S
evm.model.scaffold108_size655003.34	393	1	Serine/threonine protein phosphatase 7 long form isogeny	noGO	NULL	S
evm.model.scaffold108_size655003.145	338	1	zinc finger protein CONSTANS-LIKE 4-like	GO:0003700 GO:0009909 GO:0010161 GO:0006355 GO:0043565 GO:0005515 GO:0008270	NULL	K
evm.model.scaffold108_size655003.89	160	1	hypothetical protein	noGO	NULL	S
evm.model.scaffold108_size655003.150	652	1	hypothetical protein	noGO	NULL	S
evm.model.scaffold108_size655003.154	157	1	OSIGBa0118P15.14 protein	GO:0004523 GO:0003887 GO:0003964 GO:0003723 GO:0090501 GO:0032197 GO:0006508 GO:0000943 GO:0006278 GO:0008233	Acting_on_ester_bonds;RNA-directed_DNA_polymerase;Acting_on_ester_bonds;DNA-directed_DNA_polymerase;Ribonuclease_H	E
evm.model.scaffold108_size655003.61	526	4	Phosphoribosylamine--glycine ligase	GO:0009570 GO:0004637 GO:0005524 GO:0046872 GO:0009113	Phosphoribosylamine--glycine_ligase	F
evm.model.scaffold108_size655003.168	225	1	Serine/threonine-protein phosphatase 7 long form-like	GO:0008270	NULL	S
evm.model.scaffold108_size655003.112	97	1	Dimer_Tnp_hAT domain-containing protein (Fragment)	GO:0005488	NULL	none
evm.model.scaffold108_size655003.95	406	1	28S ribosomal protein S9, mitochondrial	GO:0000462 GO:0003723 GO:0003735 GO:0009555 GO:0015935 GO:0006412	NULL	J
evm.model.scaffold108_size655003.160	94	1	hypothetical protein	noGO	NULL	S
evm.model.scaffold108_size655003.85	343	Singleton	Post-GPI attachment to proteins factor 3	GO:0000139 GO:0016021 GO:0031227 GO:0016788 GO:0006506	NULL	S
evm.model.scaffold108_size655003.23	202	1	Lachrymatory-factor synthase	noGO	NULL	S
evm.model.scaffold108_size655003.155	309	1	Uncharacterized protein	noGO	NULL	L
evm.model.scaffold108_size655003.27	707	Singleton	putative amidohydrolase YtcJ isoform X2	GO:0016021 GO:0048471 GO:0003677 GO:0003899 GO:0016810 GO:0043531 GO:0006351 GO:0009845 GO:0010218	DNA-directed_RNA_polymerase	S
evm.model.scaffold108_size655003.67	312	4	protein HAIKU1-like	GO:0080113 GO:0043078 GO:0009960	NULL	S
evm.model.scaffold108_size655003.141	326	2	WEB family protein At2g38370-like	noGO	NULL	S
evm.model.scaffold108_size655003.133	506	4	Putative glycosyltransferase	GO:0016757 GO:0016020	NULL	M
evm.model.scaffold108_size655003.188	756	1	Uncharacterized protein	noGO	NULL	S
evm.model.scaffold108_size655003.137	209	1	abscisic acid receptor PYL4-like	GO:0004864 GO:0032515 GO:0009738 GO:0042803 GO:0080163 GO:0010427 GO:0005737 GO:0038023 GO:0009867	NULL	S
evm.model.scaffold108_size655003.142	1208	1	DNA-directed RNA polymerase subunit beta	GO:0000419 GO:0000418 GO:0006366 GO:0005720 GO:0005665 GO:0003677 GO:0005736 GO:0001055 GO:0032549 GO:0006306 GO:0016020 GO:0071359 GO:0030422 GO:0050832 GO:0050776	DNA-directed_RNA_polymerase	K
evm.model.scaffold108_size655003.36	610	1	nucleolar complex protein 4 homolog B	GO:0016020 GO:0031981 GO:0042254	NULL	J
evm.model.scaffold108_size655003.183	230	1	hypothetical protein	noGO	NULL	S
evm.model.scaffold108_size655003.97	169	1	trafficking protein particle complex subunit 1-like	GO:0030008 GO:0006888 GO:0009555 GO:0005829 GO:0017112 GO:0009933 GO:0065009	NULL	U
evm.model.scaffold108_size655003.115	556	1	Root phototropism protein 2	GO:0009638 GO:0005515 GO:0005737	NULL	S
evm.model.scaffold108_size655003.159	693	1	Uncharacterized protein	noGO	NULL	S
evm.model.scaffold108_size655003.7	106	1	hypothetical protein	noGO	NULL	S
evm.model.scaffold108_size655003.161	168	1	hypothetical protein	noGO	NULL	S
evm.model.scaffold108_size655003.60	568	4	Protein NRT1/ PTR FAMILY 7.3 like	GO:0015112 GO:0071805 GO:0098656 GO:0055075 GO:0015386 GO:0010150 GO:0015706 GO:1902600 GO:0016021 GO:0010167 GO:0005886 GO:0009987	NULL	E
evm.model.scaffold108_size655003.29	194	1	Peptidyl-prolyl cis-trans isomerase	GO:0016018 GO:0065003 GO:0016607 GO:0005681 GO:0051082 GO:0000413 GO:0042026 GO:0005886 GO:0000398 GO:0003755 GO:0071001 GO:0043021 GO:0046540 GO:0005829 GO:0045070	Peptidylprolyl_isomerase	O
evm.model.scaffold108_size655003.181	400	1	vegetative incompatibility protein HET-E-1-like	GO:0005515 GO:0016740	NULL	S
evm.model.scaffold108_size655003.16	106	1	Uncharacterized protein	GO:0006807 GO:0043170 GO:0044238	NULL	L
evm.model.scaffold108_size655003.191	242	1	Uncharacterized protein	noGO	NULL	L
evm.model.scaffold108_size655003.52	117	1	hypothetical protein	noGO	NULL	S
evm.model.scaffold108_size655003.35	154	1	Serine/threonine-protein phosphatase 7 long form-like	noGO	NULL	S
evm.model.scaffold108_size655003.28	197	Singleton	NADPH:quinone oxidoreductase-like	GO:0052873 GO:0010181 GO:0003955 GO:0016021 GO:0005829 GO:0055114	FMN_reductase_(NADPH);FMN_reductase_(NAD(P)H);NAD(P)H_dehydrogenase_(quinone)	S
evm.model.scaffold108_size655003.93	293	1	BAG family molecular chaperone regulator 1	GO:0071629 GO:0005829 GO:0051087	NULL	T
evm.model.scaffold108_size655003.120	386	4	26S proteasome non-ATPase regulatory subunit 6 homolog	GO:0043161 GO:0050790 GO:0005829 GO:0000502 GO:0030234 GO:0005886	NULL	O
evm.model.scaffold108_size655003.138	289	2	alpha-soluble NSF attachment protein	GO:0061025 GO:0009506 GO:0019905 GO:0035494 GO:0005483 GO:0031201 GO:0006886 GO:0005774 GO:0005886	NULL	U
evm.model.scaffold108_size655003.131	148	1	hypothetical protein	noGO	NULL	S
evm.model.scaffold108_size655003.51	106	1	Uncharacterized protein	noGO	NULL	S
evm.model.scaffold108_size655003.171	582	1	hypothetical protein	noGO	NULL	S
evm.model.scaffold108_size655003.156	482	1	Uncharacterized protein	noGO	NULL	L
evm.model.scaffold108_size655003.50	131	1	hypothetical protein	noGO	NULL	S
evm.model.scaffold108_size655003.20	274	1	Uncharacterized protein (Fragment)	noGO	NULL	S
evm.model.scaffold108_size655003.129	232	1	Uncharacterized protein	noGO	NULL	L
evm.model.scaffold108_size655003.30	620	3	probable protein arginine N-methyltransferase 3	GO:0003676 GO:0035242 GO:0034969 GO:0019919 GO:0005829 GO:0006355 GO:0008469	Transferring_one-carbon_groups	KOT
evm.model.scaffold1090_size17948.1	268	1	Putative transcription repressor PLATZ family	GO:0008270	NULL	S
evm.model.scaffold1091_size17896.4	467	1	Protein ENHANCED DISEASE RESISTANCE like	noGO	NULL	S
evm.model.scaffold1091_size17896.2	1338	1	paired amphipathic helix protein Sin3-like 2 isoform X1	GO:0003714 GO:0006355	NULL	B
evm.model.scaffold1092_size17866.4	339	1	AP2/ERF and B3 domain-containing transcription factor RAV1-like	GO:0003700 GO:0045892 GO:0048366 GO:0044212 GO:0043565 GO:0009741 GO:0009910 GO:0048527	NULL	K
evm.model.scaffold1092_size17866.3	364	1	Methionine aminopeptidase	GO:0009507 GO:0031365 GO:0070084 GO:0046872 GO:0006508 GO:0070006	Acting_on_peptide_bonds_(peptidases)	O
evm.model.scaffold1092_size17866.2	271	1	GDT1 family protein	GO:0080167 GO:0016021	NULL	S
evm.model.scaffold1093_size17851.3	105	1	hypothetical protein	noGO	NULL	S
evm.model.scaffold1093_size17851.1	126	1	hypothetical protein	noGO	NULL	S
evm.model.scaffold1093_size17851.5	318	1	serine/threonine-protein phosphatase 7 long form homolog	noGO	NULL	S
evm.model.scaffold1095_size17812.1	333	1	Short-chain dehydrogenase tic 32, chloroplastic	GO:0102339 GO:0102340 GO:0102341 GO:0102342 GO:0055114	Very-long-chain_3-oxoacyl-CoA_reductase	Q
evm.model.scaffold1096_size17718.3	343	3	CREB binding protein/P300	GO:0009651 GO:0010182 GO:0009611 GO:0009555 GO:0009753 GO:0009553 GO:0009751 GO:0009734 GO:0009409 GO:0019005 GO:0016573 GO:0008270 GO:0030162 GO:0006355 GO:0042542 GO:0007623 GO:0004402 GO:0051973 GO:0005516 GO:0043161 GO:0009738 GO:0031625 GO:0003712 GO:0005737 GO:0010167	Arylamine_N-acetyltransferase;Histone_acetyltransferase	K
evm.model.scaffold1098_size17586.2	331	4	UDP-galactose transporter 2-like	GO:0016021 GO:0005459 GO:0015297 GO:0008643 GO:0072334	NULL	EG
evm.model.scaffold1098_size17586.6	792	4	Vacuolar protein sorting-associated protein 35	GO:0006869 GO:0005770 GO:0016021 GO:0030906 GO:0005829 GO:0008565 GO:0008289 GO:0006886 GO:0042147 GO:0005215	NULL	U
evm.model.scaffold1098_size17586.4	204	4	FACT complex subunit like	noGO	NULL	none
evm.model.scaffold1098_size17586.5	251	4	Putative hepatocellular carcinoma-associated antigen 59-like	GO:0016607 GO:0080022 GO:0055121 GO:1904667	NULL	S
evm.model.scaffold1098_size17586.3	331	3	UDP-galactose transporter 2-like	GO:0016021 GO:0005459 GO:0015297 GO:0008643 GO:0072334	NULL	EG
evm.model.scaffold1098_size17586.7	326	4	DNA ligase 1-like	noGO	NULL	none
evm.model.scaffold1099_size17546.6	104	1	Rhodanese-like domain-containing protein	noGO	NULL	none
evm.model.scaffold109_size652032.112	835	1	protein TOC75-3, chloroplastic-like	GO:0009662 GO:0061927 GO:0048598 GO:0015450 GO:0045037 GO:0005774 GO:0031359 GO:0009658 GO:0009735	Mitochondrial_protein-transporting_ATPase;Chloroplast_protein-transporting_ATPase	M
evm.model.scaffold109_size652032.180	149	1	Uncharacterized protein	noGO	NULL	S
evm.model.scaffold109_size652032.17	288	1	hypothetical protein	noGO	NULL	S
evm.model.scaffold109_size652032.87	175	1	hypothetical protein	noGO	NULL	S
evm.model.scaffold109_size652032.140	148	3	hypothetical protein	noGO	NULL	S
evm.model.scaffold109_size652032.46	186	3	hypothetical protein	noGO	NULL	S
evm.model.scaffold109_size652032.181	344	1	hypothetical protein	noGO	NULL	S
evm.model.scaffold109_size652032.71	155	1	hypothetical protein	noGO	NULL	S
evm.model.scaffold109_size652032.27	787	1	Polyadenylate-binding protein	GO:0003723 GO:0005515 GO:0046872	NULL	A
evm.model.scaffold109_size652032.3	478	1	serine/threonine-protein phosphatase 7 long form homolog	noGO	NULL	S
evm.model.scaffold109_size652032.60	751	1	probable galactinol--sucrose galactosyltransferase 1	GO:0016757 GO:0010325	NULL	S
evm.model.scaffold109_size652032.188	154	1	DNA/RNA polymerase superfamily protein	GO:0006807 GO:0043170 GO:0044238	NULL	L
evm.model.scaffold109_size652032.98	401	Singleton	chromo domain protein LHP1-like	GO:0035064 GO:0043565 GO:0003682 GO:0006342 GO:0045857 GO:0009910 GO:0005720 GO:0009507 GO:0000791 GO:0009825 GO:0003935 GO:0010016 GO:0010048	GTP_cyclohydrolase_II	B
evm.model.scaffold109_size652032.99	257	Singleton	Putative ovule protein (Fragment)	GO:0016021	NULL	none
evm.model.scaffold109_size652032.194	376	1	probable protein phosphatase 2C 43	GO:0004724 GO:0006470 GO:0043169	Protein-serine/threonine_phosphatase	T
evm.model.scaffold109_size652032.28	454	1	TBC1 domain family member 13	GO:0031338 GO:0090630 GO:0005096 GO:0016020 GO:0005829 GO:0012505 GO:0006886 GO:0017137	NULL	S
evm.model.scaffold109_size652032.1	323	1	ribosomal RNA-processing protein 14-C-like	GO:0005730 GO:0005742 GO:0003677 GO:0003723 GO:0030150 GO:0042273 GO:0042274	NULL	S
evm.model.scaffold109_size652032.32	694	1	Putative ELM2 domain, Homeodomain-like protein	GO:0003677	NULL	S
evm.model.scaffold109_size652032.91	512	1	tRNA pseudouridine synthase	GO:0001522 GO:0003723 GO:0008033 GO:0106029	tRNA_pseudouridine(38-40)_synthase;tRNA_pseudouridine(38/39)_synthase;tRNA_pseudouridine(65)_synthase;tRNA_pseudouridine(55)_synthase;tRNA_pseudouridine(32)_synthase;tRNA_pseudouridine(13)_synthase;tRNA_pseudouridine(31)_synthase;Mitochondrial_tRNA_pseudouridine(27/28)_synthase	J
evm.model.scaffold109_size652032.74	142	1	Uncharacterized protein (Fragment)	noGO	NULL	L
evm.model.scaffold109_size652032.9	104	1	hypothetical protein	noGO	NULL	S
evm.model.scaffold109_size652032.15	118	1	Uncharacterized protein (Fragment)	noGO	NULL	S
evm.model.scaffold109_size652032.8	188	1	RING-H2 finger protein ATL80-like	GO:0061630 GO:0043161 GO:0009909 GO:0010966 GO:0010200 GO:0070417 GO:0005886 GO:0016567 GO:0016021	NULL	O
evm.model.scaffold109_size652032.7	125	1	Small GTPase superfamily	GO:0016021	NULL	S
evm.model.scaffold109_size652032.111	239	Singleton	Protein FRA10AC1-like protein	noGO	NULL	S
evm.model.scaffold109_size652032.153	410	1	Uncharacterized protein	GO:0003676 GO:0004523	Acting_on_ester_bonds;Acting_on_ester_bonds;Ribonuclease_H	L
evm.model.scaffold109_size652032.131	146	3	hypothetical protein	noGO	NULL	S
evm.model.scaffold109_size652032.90	509	3	pentatricopeptide repeat-containing protein At5g42450, mitochondrial-like	GO:0090305 GO:0003723 GO:0005515 GO:0009451 GO:0004519 GO:0043231	NULL	I
evm.model.scaffold109_size652032.36	259	1	NAC domain-containing protein 21/22	GO:0003677 GO:0003700 GO:0010072 GO:0006355 GO:0009734 GO:0048527	NULL	K
evm.model.scaffold109_size652032.113	551	1	Sugar/inositol transporter	GO:0005887 GO:0005524 GO:1902600 GO:0009941 GO:0005351 GO:0046323 GO:0005355	NULL	U
evm.model.scaffold109_size652032.142	235	1	Uncharacterized protein	noGO	NULL	S
evm.model.scaffold109_size652032.58	421	1	Uncharacterized protein	noGO	NULL	L
evm.model.scaffold109_size652032.73	793	1	Uncharacterized protein	noGO	NULL	S
evm.model.scaffold109_size652032.59	445	1	uncharacterized WD repeat-containing protein C2A9.03-like	GO:0016021 GO:0005515	NULL	S
evm.model.scaffold109_size652032.150	159	1	hypothetical protein	noGO	NULL	S
evm.model.scaffold109_size652032.34	1077	1	isoleucine--tRNA ligase, chloroplastic/mitochondrial	GO:0009570 GO:0048481 GO:0006428 GO:0005524 GO:0004822 GO:0106074 GO:0002161 GO:0032543 GO:0000049	Isoleucine--tRNA_ligase;Carboxylesterase	J
evm.model.scaffold109_size652032.92	179	1	Uncharacterized protein	noGO	NULL	L
evm.model.scaffold109_size652032.45	76	3	hypothetical protein	noGO	NULL	S
evm.model.scaffold109_size652032.89	442	3	pentatricopeptide repeat-containing protein At5g42450, mitochondrial-like	GO:0090305 GO:0140096 GO:0003723 GO:0005515 GO:0009451 GO:0004519 GO:0043231	NULL	I
evm.model.scaffold109_size652032.51	169	1	hypothetical protein	noGO	NULL	S
evm.model.scaffold109_size652032.106	105	1	hypothetical protein	noGO	NULL	S
evm.model.scaffold109_size652032.26	590	1	2,3-dimethylmalate lyase	GO:0003676 GO:0009507 GO:0016310 GO:0047529 GO:0016301	2,3-dimethylmalate_lyase	C
evm.model.scaffold109_size652032.76	199	1	uncharacterized protein LOC104598722	noGO	NULL	L
evm.model.scaffold109_size652032.29	827	1	Receptor-like kinase tmk4	GO:0005524 GO:0009506 GO:0005515 GO:0007178 GO:0005576 GO:0006468 GO:0005886 GO:0004675	Transferring_phosphorus-containing_groups	T
evm.model.scaffold109_size652032.18	154	1	hypothetical protein	noGO	NULL	S
evm.model.scaffold109_size652032.145	271	2	Golgi apparatus membrane protein TVP23	GO:0031901 GO:0009826 GO:0016192 GO:0007030 GO:0030173 GO:0009306 GO:0032588	NULL	S
evm.model.scaffold10_size1516488.349	285	1	Peptidyl-prolyl cis-trans isomerase	GO:0016757	NULL	none
evm.model.scaffold10_size1516488.295	240	1	Kinesin-like protein	GO:0016021	NULL	S
evm.model.scaffold10_size1516488.259	141	1	Calmodulin and related proteins (EF-Hand superfamily)	GO:0005509	NULL	T
evm.model.scaffold10_size1516488.338	416	1	F-box/kelch-repeat protein SKIP11-like	GO:0005777 GO:0043161 GO:0031625 GO:0030162 GO:0019005	NULL	S
evm.model.scaffold10_size1516488.316	151	Singleton	AIG2-like protein	GO:0016740	NULL	S
evm.model.scaffold10_size1516488.182	397	3	Putative lactosylceramide 4-alpha-galactosyltransferase-like	GO:0016021 GO:0050512	Lactosylceramide_4-alpha-galactosyltransferase	G
evm.model.scaffold10_size1516488.384	562	1	Metacaspase involved in regulation of apoptosis	noGO	NULL	DO
evm.model.scaffold10_size1516488.281	617	4	Ankyrin repeat-containing protein	GO:0005515	NULL	IQ
evm.model.scaffold10_size1516488.372	704	1	Uncharacterized protein	noGO	NULL	S
evm.model.scaffold10_size1516488.236	227	1	Auxin-responsive protein	GO:0003700 GO:0042802 GO:0045892 GO:0009611 GO:0009753 GO:1900057 GO:0009630 GO:0009734 GO:0009414 GO:0010102	NULL	K
evm.model.scaffold10_size1516488.65	158	1	Protein GLUTAMINE DUMPER 1-like	GO:0080143 GO:0016021 GO:0010585 GO:0006521	NULL	S
evm.model.scaffold10_size1516488.323	185	1	Ubiquitin system component Cue	GO:0005515	NULL	S
evm.model.scaffold10_size1516488.283	137	4	Cyclin-dependent protein kinase	GO:0045786 GO:0032875	NULL	S
evm.model.scaffold10_size1516488.166	82	1	mediator of RNA polymerase II transcription subunit 2-like	noGO	NULL	none
evm.model.scaffold10_size1516488.320	407	1	3-hydroxyisobutyryl-CoA hydrolase-like protein 2, mitochondrial	GO:0003860 GO:0006635	3-hydroxyisobutyryl-CoA_hydrolase	I
evm.model.scaffold10_size1516488.314	879	1	ethylene-overproduction protein 1	GO:0016021 GO:0005515 GO:0016740	NULL	S
evm.model.scaffold10_size1516488.87	242	1	hypothetical protein	noGO	NULL	S
evm.model.scaffold10_size1516488.300	289	1	homeobox protein knotted-1-like 1	GO:0003677 GO:0006355	NULL	K
evm.model.scaffold10_size1516488.213	578	4	RNA polymerase sigma factor	GO:0071482 GO:0000990 GO:0016987 GO:0003677 GO:0003700 GO:0009507 GO:2000142 GO:0000988 GO:0006399 GO:0043254 GO:0009658 GO:0010114	NULL	K
evm.model.scaffold10_size1516488.307	305	Singleton	Phosphatidate cytidylyltransferase, mitochondrial	GO:0004605 GO:0016020 GO:0032049	Phosphatidate_cytidylyltransferase	S
evm.model.scaffold10_size1516488.226	696	1	Uncharacterized protein	noGO	NULL	S
evm.model.scaffold10_size1516488.269	728	4	ABC transporter G family member 6-like	GO:0005524 GO:0042626 GO:0055085 GO:0043492 GO:0016021 GO:0015716 GO:0085029 GO:0015748 GO:0015405 GO:0015416 GO:0005886	Adenosinetriphosphatase;ABC-type_phosphonate_transporter;Nucleoside-triphosphate_phosphatase	Q
evm.model.scaffold10_size1516488.13	529	4	Importin subunit alpha	GO:0009506 GO:0005515 GO:0061608 GO:0006607 GO:0005618 GO:0005829 GO:0008565 GO:0005730 GO:0008139 GO:0005643 GO:0005654	NULL	U
evm.model.scaffold10_size1516488.294	195	1	Uncharacterized protein	noGO	NULL	S
evm.model.scaffold10_size1516488.156	102	1	hypothetical protein	noGO	NULL	S
evm.model.scaffold10_size1516488.88	229	1	hypothetical protein	noGO	NULL	S
evm.model.scaffold10_size1516488.379	673	1	proteinaceous RNase P 1, chloroplastic/mitochondrial-like	GO:0004526 GO:0005515 GO:0001682 GO:0090501	Acting_on_ester_bonds;Acting_on_ester_bonds;Ribonuclease_P	V
evm.model.scaffold10_size1516488.188	136	4	Putative defensin-like protein-like	noGO	NULL	none
evm.model.scaffold10_size1516488.385	730	1	Calmodulin-binding transcription activator 2	GO:0005516 GO:0071275 GO:0050826 GO:0001228 GO:0043565 GO:0045944 GO:0009414 GO:0009733	NULL	S
evm.model.scaffold10_size1516488.2	102	1	hypothetical protein	noGO	NULL	S
evm.model.scaffold10_size1516488.272	520	4	Pseudouridine synthase	GO:0003723 GO:0106029 GO:1990481 GO:0006400	tRNA_pseudouridine(38-40)_synthase;tRNA_pseudouridine(38/39)_synthase;tRNA_pseudouridine(65)_synthase;tRNA_pseudouridine(55)_synthase;tRNA_pseudouridine(32)_synthase;tRNA_pseudouridine(13)_synthase;tRNA_pseudouridine(31)_synthase;Mitochondrial_tRNA_pseudouridine(27/28)_synthase	J
evm.model.scaffold10_size1516488.308	638	1	fimbrin-like protein 2	GO:0051015 GO:0051764 GO:0009860 GO:0005618 GO:0032432 GO:0051639 GO:0005829 GO:0005884 GO:0009846 GO:0051017	NULL	Z
evm.model.scaffold10_size1516488.335	367	1	transcription factor MYB86-like	GO:0001076 GO:0000989 GO:0000988 GO:0044212 GO:0030154 GO:0043565 GO:0010199 GO:0000981 GO:0001135 GO:0006357	NULL	ADK
evm.model.scaffold10_size1516488.111	191	1	Uncharacterized protein	noGO	NULL	S
evm.model.scaffold10_size1516488.311	325	Singleton	Adenylate kinase	GO:0009507 GO:0004017 GO:0016310 GO:0046940	Nucleoside-phosphate_kinase;Adenylate_kinase	S
evm.model.scaffold10_size1516488.247	461	4	legumin A-like	GO:0033095 GO:0071215 GO:0045735 GO:0010431 GO:0009735	NULL	O
evm.model.scaffold10_size1516488.17	856	4	Protein gamete expressed 2	GO:0005887 GO:0005515 GO:0003824	NULL	S
evm.model.scaffold10_size1516488.232	979	4	protein argonaute 10-like	GO:0035198 GO:0090305 GO:1902183 GO:0004386 GO:0009934 GO:0006413 GO:0003743 GO:0005515 GO:0005737 GO:0004527 GO:0035019 GO:0031047 GO:0051607 GO:0016740 GO:0010586	Adenosinetriphosphatase;Nucleoside-triphosphate_phosphatase	J
evm.model.scaffold10_size1516488.90	226	1	Rad60/SUMO-like domain containing protein	noGO	NULL	S
evm.model.scaffold10_size1516488.330	196	1	Peptidyl-tRNA hydrolase 2, mitochondrial	GO:0005829 GO:0016021 GO:0004045	Aminoacyl-tRNA_hydrolase;Carboxylesterase	S
evm.model.scaffold10_size1516488.50	349	1	hypothetical protein	noGO	NULL	S
evm.model.scaffold10_size1516488.254	279	Singleton	Hydroxyethylthiazole kinase	GO:0004417 GO:0036172 GO:0016310	Hydroxyethylthiazole_kinase	H
evm.model.scaffold10_size1516488.219	639	3	Amine oxidase	GO:0052597 GO:0009308 GO:0005507 GO:0048038 GO:0008131 GO:0055114 GO:0097185	Diamine_oxidase;Primary-amine_oxidase	Q
evm.model.scaffold10_size1516488.113	89	1	hypothetical protein	noGO	NULL	S
evm.model.scaffold10_size1516488.215	314	4	50S ribosomal protein L3, chloroplastic	GO:0009570 GO:0003735 GO:0016020 GO:0009941 GO:0019843 GO:0005840 GO:0006412	NULL	J
evm.model.scaffold10_size1516488.184	644	4	Pentatricopeptide repeat-containing protein	GO:0090305 GO:0008270 GO:0003723 GO:0005515 GO:0009451 GO:0004519 GO:0043231	NULL	S
evm.model.scaffold10_size1516488.22	744	4	translocase of chloroplast 159, chloroplastic	GO:0005515 GO:0005525	NULL	S
evm.model.scaffold10_size1516488.218	646	3	Amine oxidase	GO:0052597 GO:0009308 GO:0005507 GO:0048038 GO:0008131 GO:0016020 GO:0055114 GO:0097185	Diamine_oxidase;Primary-amine_oxidase	Q
evm.model.scaffold10_size1516488.21	406	4	Flocculation protein	noGO	NULL	none
evm.model.scaffold10_size1516488.287	474	4	Glycosyltransferase	GO:0043231 GO:0008194 GO:0016758	NULL	CG
evm.model.scaffold10_size1516488.179	297	4	Clathrin light chain	GO:0032050 GO:0072583 GO:0030130 GO:0005198 GO:0030132 GO:0005829 GO:0006886	NULL	U
evm.model.scaffold10_size1516488.20	120	2	Dynein light chain	GO:0016459 GO:2000582 GO:0042803 GO:0008574 GO:0044458 GO:0045505 GO:0005930 GO:0005874 GO:0097110 GO:0005868 GO:0046982 GO:0051959 GO:0010970	Adenosinetriphosphatase;Nucleoside-triphosphate_phosphatase;Plus-end-directed_kinesin_ATPase	Z
evm.model.scaffold10_size1516488.214	739	4	Cyclic nucleotide-gated ion channel 8	GO:0005249 GO:0005887 GO:0071805 GO:0042391 GO:0005515 GO:0009860 GO:0034765 GO:0046686 GO:0090406	NULL	P
evm.model.scaffold10_size1516488.116	187	1	Protein like	noGO	NULL	A
evm.model.scaffold10_size1516488.277	265	4	Cystinosin-like protein	GO:1902475 GO:0015184 GO:0016021 GO:0005774 GO:0015811	NULL	E
evm.model.scaffold10_size1516488.264	106	1	Protein yippee-like	GO:0046872	NULL	S
evm.model.scaffold10_size1516488.107	324	1	Uncharacterized protein	noGO	NULL	S
evm.model.scaffold10_size1516488.266	105	1	Uncharacterized protein	noGO	NULL	S
evm.model.scaffold10_size1516488.284	442	4	Glycosyl transferase	GO:0008375 GO:0016021 GO:0000139	NULL	S
evm.model.scaffold10_size1516488.105	195	1	Putative coproporphyrinogen-III oxidase, aerobic-like	GO:0016021	NULL	S
evm.model.scaffold10_size1516488.201	410	1	probable serine incorporator	GO:1902475 GO:0098655 GO:0015194 GO:0015825 GO:0016021	NULL	S
evm.model.scaffold10_size1516488.302	178	3	Flap endonuclease	GO:0004519 GO:0090305	NULL	S
evm.model.scaffold10_size1516488.334	425	1	43kDa postsynaptic protein	GO:0003676	NULL	O
evm.model.scaffold10_size1516488.255	475	1	Wee1-like protein kinase	GO:0007050 GO:0018108 GO:0005524 GO:0000076 GO:0007093 GO:0004715 GO:0004674	Transferring_phosphorus-containing_groups;Transferring_phosphorus-containing_groups;Non-specific_protein-tyrosine_kinase	T
evm.model.scaffold10_size1516488.191	459	4	Glycosyltransferase	GO:0080043 GO:0080044 GO:0043231 GO:0016020	NULL	CG
evm.model.scaffold10_size1516488.262	288	1	probable phytol kinase 3, chloroplastic	GO:0048440 GO:0009737 GO:0052670 GO:0052671 GO:0016021 GO:0016310 GO:0016487 GO:0052669 GO:0016301	Farnesol_kinase	I
evm.model.scaffold10_size1516488.301	287	4	Uncharacterized protein	noGO	NULL	S
evm.model.scaffold10_size1516488.161	218	1	hypothetical protein	noGO	NULL	S
evm.model.scaffold10_size1516488.199	1328	1	Pyruvate, phosphate dikinase	GO:0009570 GO:0005829 GO:0005524 GO:0046872 GO:0050242 GO:0016310 GO:0016301 GO:0006090	Pyruvate,_phosphate_dikinase	F
evm.model.scaffold10_size1516488.270	1646	4	Potassium transporter	GO:0015079 GO:0071805 GO:0016021 GO:0005774 GO:0009932	NULL	P
evm.model.scaffold10_size1516488.177	199	4	ribosomal RNA-processing protein 17-like	GO:0003676	NULL	S
evm.model.scaffold10_size1516488.381	510	1	Aspartic proteinase-like protein 2	GO:0004190 GO:0030163 GO:0006508 GO:0016021 GO:0046658	Acting_on_peptide_bonds_(peptidases)	O
evm.model.scaffold10_size1516488.367	573	1	Pentatricopeptide repeat-containing protein	GO:0005515 GO:0009451	NULL	S
evm.model.scaffold10_size1516488.175	794	4	anaphase-promoting complex subunit 4	GO:0061630 GO:0070979 GO:0005515 GO:0009793 GO:0005680 GO:0031145 GO:0045842 GO:0034399 GO:0048481	NULL	DIOT
evm.model.scaffold10_size1516488.332	210	1	Transmembrane protein	noGO	NULL	none
evm.model.scaffold10_size1516488.99	491	2	Amino-acid permease	GO:0042910 GO:0015189 GO:0015297 GO:0015185 GO:1903401 GO:0015181 GO:0015180 GO:1903826 GO:0005313 GO:0005887 GO:0015808 GO:0015813 GO:0015812	NULL	E
evm.model.scaffold10_size1516488.224	481	1	Folate-biopterin transporter 1, chloroplastic	GO:0015885 GO:0015884 GO:1905039 GO:0015231 GO:0015350 GO:0035461 GO:0004298 GO:0006855 GO:0008517 GO:0031969 GO:0005839 GO:0051958 GO:0016021 GO:0051603	Acting_on_peptide_bonds_(peptidases)	S
evm.model.scaffold10_size1516488.348	140	1	vacuolar protein sorting-associated protein 55 homolog	GO:2000009 GO:0016021 GO:0032511	NULL	T
evm.model.scaffold10_size1516488.23	461	4	xyloglucan 6-xylosyltransferase 2-like	GO:0005802 GO:0009969 GO:0035252 GO:0016021 GO:0033843	Xyloglucan_6-xylosyltransferase	GM
evm.model.scaffold10_size1516488.317	945	1	Pentatricopeptide repeat-containing protein	GO:0090305 GO:0008270 GO:0003723 GO:0005515 GO:0009451 GO:0004519 GO:0043231	NULL	S
evm.model.scaffold10_size1516488.5	758	2	Somatic embryogenesis receptor kinase 1	GO:1900140 GO:0060548 GO:0009742 GO:0007178 GO:0006468 GO:0006535 GO:0005886 GO:0004675 GO:0005524 GO:0016021 GO:0010008 GO:0010200 GO:0033612	Transferring_phosphorus-containing_groups	T
evm.model.scaffold10_size1516488.176	247	4	stem-specific protein TSJT1-like	noGO	NULL	S
evm.model.scaffold10_size1516488.263	181	1	50S ribosomal protein L27, chloroplastic	GO:0009570 GO:0003735 GO:0009941 GO:0005840 GO:0009735 GO:0006412 GO:0009579	NULL	J
evm.model.scaffold10_size1516488.368	545	1	BTB/POZ and TAZ domain-containing protein 4	GO:0008270 GO:0009651 GO:0030162 GO:0009611 GO:0009753 GO:0006355 GO:0042542 GO:0009751 GO:0005774 GO:0009733 GO:0009409 GO:0004402 GO:0009739 GO:0005516 GO:0043161 GO:0031625 GO:0003712 GO:0019005 GO:0016573 GO:0010200	Arylamine_N-acetyltransferase;Histone_acetyltransferase	K
evm.model.scaffold10_size1516488.327	548	1	target of Myb protein 1-like	GO:0016558 GO:0006635 GO:0061630 GO:0031625 GO:0005737 GO:0016567	NULL	U
evm.model.scaffold10_size1516488.337	226	1	Extracellular ribonuclease le	GO:0090502 GO:0009718 GO:0005615 GO:0003723 GO:0005618 GO:0009611 GO:0016829 GO:0016036 GO:0005886 GO:0006401 GO:0033897	Acting_on_ester_bonds;Acting_on_ester_bonds;Ribonuclease_T(2)	A
evm.model.scaffold10_size1516488.170	151	3	Uncharacterized protein	noGO	NULL	S
evm.model.scaffold10_size1516488.328	247	1	aquaporin TIP4-1	GO:0015840 GO:0005887 GO:0006833 GO:0015793 GO:0034220 GO:0042807 GO:0015250	NULL	P
evm.model.scaffold10_size1516488.313	268	1	Putative ribose-5-phosphate isomerase 3, chloroplastic	GO:0009570 GO:0009052 GO:0019253 GO:0009941 GO:0004751 GO:0042742 GO:0009735 GO:0009535	Ribose-5-phosphate_isomerase	G
evm.model.scaffold10_size1516488.167	234	1	Remorin family protein	GO:0009506 GO:0005886	NULL	S
evm.model.scaffold10_size1516488.112	109	1	hypothetical protein	noGO	NULL	S
evm.model.scaffold10_size1516488.162	455	1	Uncharacterized protein	noGO	NULL	L
evm.model.scaffold10_size1516488.268	780	4	protein NEDD1	GO:0000919 GO:0036064 GO:1902410 GO:0000922 GO:0009555 GO:0009553 GO:0060236 GO:0000242 GO:0005515 GO:0005814 GO:0005828 GO:0071539 GO:2000694 GO:0032467	NULL	T
evm.model.scaffold10_size1516488.329	545	1	Carotenoid cleavage dioxygenase 8-like b, chloroplastic	GO:0009570 GO:0009926 GO:0046872 GO:0016121 GO:0055114 GO:0010436 GO:0102251 GO:0016124 GO:1901601 GO:0009965 GO:0010223 GO:0009733	Acting_on_single_donors_with_incorporation_of_molecular_oxygen_(oxygenases)._The_oxygen_incorporated_need_not_be_derived_from_O(2);All-trans-10-apo-beta-carotenal_13,14-cleaving_dioxygenase	Q
evm.model.scaffold10_size1516488.350	784	1	Putative anion transporter 5	GO:0005315 GO:0098656 GO:0016021 GO:0009536 GO:0009624	NULL	G
evm.model.scaffold10_size1516488.298	343	Singleton	RNA pseudouridine synthase 1-like	GO:0031119 GO:0003723 GO:0009982	NULL	A
evm.model.scaffold10_size1516488.252	906	2	1,4-alpha-glucan-branching enzyme 3, chloroplastic/amyloplastic isoform X1	GO:0009507 GO:0005978 GO:0003844 GO:0009791 GO:0043169 GO:0102752 GO:0004553	1,4-alpha-glucan_branching_enzyme	G
evm.model.scaffold10_size1516488.114	526	2	amino-acid permease BAT1 homolog	GO:0042910 GO:0015189 GO:0015297 GO:0015185 GO:1903401 GO:0015181 GO:0015180 GO:1903826 GO:0005313 GO:0005887 GO:0015808 GO:0015813 GO:0015812	NULL	E
evm.model.scaffold10_size1516488.275	175	4	Plexin-D1 like	noGO	NULL	none
evm.model.scaffold10_size1516488.168	797	1	Pentatricopeptide repeat-containing protein	GO:0005515 GO:0008270 GO:0009451	NULL	S
evm.model.scaffold10_size1516488.312	608	Singleton	multisubstrate pseudouridine synthase 7	GO:0001522 GO:0003723 GO:0009982	NULL	S
evm.model.scaffold10_size1516488.326	1006	1	myb-related protein 3R-1-like	GO:0008285 GO:0000989 GO:0000988 GO:0044212 GO:0051052 GO:0043565 GO:0009751 GO:0000981 GO:0001135 GO:0006357 GO:0009623 GO:0001076 GO:0045892 GO:0003713 GO:0045893 GO:0032465 GO:0030154 GO:1901181 GO:0032875	NULL	K
evm.model.scaffold10_size1516488.271	572	4	serine/threonine-protein kinase D6PKL1-like	GO:0005524 GO:0009638 GO:0062075 GO:0005737 GO:0004674 GO:0006468 GO:0010540 GO:0035556 GO:0005886	Transferring_phosphorus-containing_groups	T
evm.model.scaffold10_size1516488.282	283	Singleton	Thymidylate kinase	GO:0009041 GO:0004798 GO:0005524 GO:0009793 GO:0006233 GO:0046940 GO:0016310 GO:0006227 GO:0006235 GO:0005654	Nucleoside-phosphate_kinase;UMP_kinase;dTMP_kinase	F
evm.model.scaffold10_size1516488.42	235	1	Uncharacterized protein	noGO	NULL	L
evm.model.scaffold10_size1516488.355	1199	1	Histone acetyltransferase hac1	GO:0004402 GO:0008270 GO:0003712 GO:0006355 GO:0016573	Arylamine_N-acetyltransferase;Histone_acetyltransferase	K
evm.model.scaffold10_size1516488.276	122	3	Plexin-D1 like	noGO	NULL	none
evm.model.scaffold10_size1516488.319	413	1	Ubiquitin-like modifier-activating enzyme 5	GO:0016779 GO:0005829 GO:0071566 GO:0071569	NULL	H
evm.model.scaffold10_size1516488.248	332	1	Malate dehydrogenase	GO:0005975 GO:0006734 GO:0030060 GO:0006107 GO:0006108 GO:0006099	Malate_dehydrogenase	C
evm.model.scaffold10_size1516488.274	399	4	GDSL esterase/lipase	GO:0009506 GO:0016020 GO:0000166 GO:0016301 GO:0016788 GO:0016798 GO:0010138	NULL	S
evm.model.scaffold10_size1516488.18	120	4	Dynein light chain	GO:0016459 GO:2000582 GO:0042803 GO:0008574 GO:0044458 GO:0045505 GO:0005930 GO:0005874 GO:0097110 GO:0005868 GO:0046982 GO:0051959 GO:0010970	Adenosinetriphosphatase;Nucleoside-triphosphate_phosphatase;Plus-end-directed_kinesin_ATPase	Z
evm.model.scaffold10_size1516488.299	312	1	Nicotianamine synthase	GO:0009860 GO:0009555 GO:0010233 GO:0030410 GO:0030418	Nicotianamine_synthase	E
evm.model.scaffold10_size1516488.51	86	1	hypothetical protein	noGO	NULL	S
evm.model.scaffold10_size1516488.217	598	4	UTP--glucose-1-phosphate uridylyltransferase-like	GO:0003735 GO:0005763 GO:0070569 GO:0006412	NULL	GJ
evm.model.scaffold10_size1516488.378	2094	1	phosphoinositide 3-kinase regulatory subunit 4-like	GO:0034272 GO:0034271 GO:0005770 GO:0045324 GO:0009555 GO:0005089 GO:0004674 GO:0009846 GO:0006468 GO:0006623 GO:0080008 GO:0005643 GO:0032968 GO:0045053 GO:0005524 GO:0000011 GO:0043130 GO:0048015 GO:0071561 GO:0030242 GO:0010008 GO:0120095 GO:0016236	Transferring_phosphorus-containing_groups	T
evm.model.scaffold10_size1516488.305	508	1	sn1-specific diacylglycerol lipase beta	GO:0046340 GO:0047372 GO:0042136 GO:0019369 GO:0005886	Acylglycerol_lipase;Carboxylesterase	IOT
evm.model.scaffold10_size1516488.333	222	1	Vesicle transport v-SNARE 12	GO:0005484 GO:0005483 GO:0006891 GO:0000149 GO:0042147 GO:0006623 GO:0005886 GO:0006896 GO:0005789 GO:0031902 GO:0006888 GO:0005802 GO:0012507 GO:0016021 GO:0031201 GO:0005829 GO:0098827 GO:0048280	NULL	U
evm.model.scaffold10_size1516488.200	344	1	Calcium-binding protein 39-like	GO:0004674 GO:0023014	Transferring_phosphorus-containing_groups	S
evm.model.scaffold10_size1516488.43	214	1	hypothetical protein	noGO	NULL	S
evm.model.scaffold10_size1516488.279	1095	1	GPI inositol-deacylase	GO:0016788 GO:0043231 GO:0016020 GO:0044444	NULL	U
evm.model.scaffold10_size1516488.286	270	4	Uncharacterized protein	noGO	NULL	none
evm.model.scaffold10_size1516488.297	322	4	SNARE protein TLG2/Syntaxin 16	GO:0006906 GO:0007030 GO:0048278 GO:0005484 GO:0016021 GO:0031201 GO:0007034 GO:0000149 GO:0006886 GO:0009306 GO:0032588	NULL	HMU
evm.model.scaffold10_size1516488.89	391	1	Copper chaperone	GO:0046916 GO:0046914 GO:0005737 GO:0030001	NULL	P
evm.model.scaffold10_size1516488.240	137	4	cysteine proteinase inhibitor B-like	GO:0004869 GO:0002020 GO:2000117	NULL	G
evm.model.scaffold10_size1516488.222	148	1	hypothetical protein	noGO	NULL	S
evm.model.scaffold10_size1516488.321	708	1	Protein kinase	GO:0016021 GO:0004672 GO:0005524 GO:0015434 GO:0016787 GO:0006468 GO:0070574	ABC-type_Cd(2+)_transporter	S
evm.model.scaffold10_size1516488.373	316	1	Peroxidase	GO:0005576 GO:0004601 GO:0020037 GO:0046872 GO:0006979 GO:0042744 GO:0055114 GO:0098869	Peroxidase	Q
evm.model.scaffold10_size1516488.324	107	Singleton	IGR protein motif	noGO	NULL	S
evm.model.scaffold10_size1516488.256	384	1	acetylajmalan esterase-like	noGO	NULL	S
evm.model.scaffold10_size1516488.345	360	1	Ethylene-responsive transcription factor LEP	GO:0003677 GO:0003700 GO:0009880 GO:0090708 GO:0005829 GO:0006355 GO:0051726 GO:0009735 GO:0048825 GO:0009733	NULL	K
evm.model.scaffold10_size1516488.153	79	1	hypothetical protein	noGO	NULL	S
evm.model.scaffold10_size1516488.234	615	1	Serine/threonine receptor-like kinase NFP	GO:0019901 GO:0005524 GO:0016021 GO:0007178 GO:0006468 GO:0005886 GO:0004675	Transferring_phosphorus-containing_groups	T
evm.model.scaffold10_size1516488.202	696	1	Mitogen-activated protein kinase kinase	GO:0000919 GO:0005524 GO:0005515 GO:0031098 GO:0032147 GO:0046777 GO:0043622 GO:0004674 GO:0023014 GO:0007346 GO:0009524	Transferring_phosphorus-containing_groups	T
evm.model.scaffold10_size1516488.237	514	1	Zeta toxin domain containing protein	GO:0016021 GO:0005524 GO:0016301 GO:0016787 GO:0016310	NULL	S
evm.model.scaffold10_size1516488.178	398	4	trafficking protein particle complex subunit 13-like isoform X2	noGO	NULL	S
evm.model.scaffold10_size1516488.278	451	1	probable E3 ubiquitin-protein ligase HERC2	GO:0016874	NULL	DZ
evm.model.scaffold10_size1516488.197	187	1	SAGA-associated factor 11	GO:0071819 GO:0035616	NULL	K
evm.model.scaffold10_size1516488.230	99	4	EPIDERMAL PATTERNING FACTOR-like protein 5	GO:0010052	NULL	S
evm.model.scaffold10_size1516488.343	301	1	G1/S-specific cyclin D	GO:0048522 GO:0051726	NULL	D
evm.model.scaffold10_size1516488.24	326	4	mitochondrial thiamine pyrophosphate carrier-like	GO:0042910 GO:0015234 GO:0031305 GO:0006839 GO:0090422 GO:0071934 GO:0030974	NULL	C
evm.model.scaffold10_size1516488.341	632	1	Hydroxyproline o-galactosyltransferase galt6	GO:0047220 GO:0009507 GO:0010405 GO:1900056 GO:0048354 GO:0016021 GO:1990714 GO:0030246 GO:0018258	Galactosylxylosylprotein_3-beta-galactosyltransferase	G
evm.model.scaffold10_size1516488.288	472	3	Glycosyltransferase	GO:0016758	NULL	CG
evm.model.scaffold10_size1516488.158	106	1	Uncharacterized protein	noGO	NULL	L
evm.model.scaffold10_size1516488.154	53	1	Uncharacterized protein	GO:0090304	NULL	S
evm.model.scaffold10_size1516488.203	1051	4	Putative atp-dependent dna helicase chr12	GO:0009651 GO:0006261 GO:0004386 GO:0061412 GO:0009414 GO:0006302 GO:0001102 GO:0005987 GO:0005524 GO:2000219 GO:0009408 GO:0009826 GO:0000182 GO:0031496 GO:0010078 GO:0016514 GO:0044109 GO:0010492 GO:0010231 GO:0008094 GO:0031492 GO:1900189 GO:0042148 GO:0042766 GO:0001085 GO:0043044 GO:0070577	Adenosinetriphosphatase;Nucleoside-triphosphate_phosphatase	A
evm.model.scaffold10_size1516488.325	705	1	Nitrate regulatory gene2 protein	GO:0071249	NULL	S
evm.model.scaffold10_size1516488.331	103	1	early nodulin-93-like	GO:0016020	NULL	S
evm.model.scaffold10_size1516488.189	597	4	Putative E3 ubiquitin-protein ligase RING1a	GO:0010492 GO:0045814 GO:0010077 GO:0010076 GO:0035102 GO:0045892 GO:0001709	NULL	O
evm.model.scaffold10_size1516488.238	148	4	transcriptional regulator SUPERMAN-like	GO:0003677 GO:0003700 GO:0010093 GO:0046872 GO:0008361 GO:0030154 GO:0006355 GO:0090691 GO:0042127 GO:0009755	NULL	S
evm.model.scaffold10_size1516488.374	492	1	SUN domain-containing protein 2	noGO	NULL	none
evm.model.scaffold10_size1516488.261	330	4	ribonucleoside-diphosphate reductase small chain	GO:0006281 GO:0004748 GO:0046872 GO:0007275 GO:0005737 GO:0006260 GO:0009263 GO:0055114 GO:0051726 GO:0012501	Acting_on_CH_or_CH(2)_groups;Ribonucleoside-diphosphate_reductase	F
evm.model.scaffold10_size1516488.339	255	1	homeobox-leucine zipper protein HAT5-like	GO:0003700 GO:0042803 GO:0009651 GO:0045893 GO:0043565 GO:0009637 GO:0017148 GO:0009965	NULL	K
evm.model.scaffold10_size1516488.306	1192	1	Protein chromatin remodeling 8	GO:0005524 GO:0008094 GO:0006283 GO:0001208 GO:0010767 GO:0010332	Adenosinetriphosphatase;Nucleoside-triphosphate_phosphatase	KL
evm.model.scaffold10_size1516488.265	123	4	Nuclear transport factor 2	GO:0005737 GO:0006606 GO:0044613	NULL	U
evm.model.scaffold10_size1516488.310	282	4	phosphoglycerate mutase-like protein AT74H	GO:0005975 GO:0050278 GO:0005829 GO:0016311	Sedoheptulose-bisphosphatase	S
evm.model.scaffold10_size1516488.336	222	1	Uncharacterized protein	GO:0016021 GO:0010256	NULL	S
evm.model.scaffold10_size1516488.190	94	4	protein NUCLEAR FUSION DEFECTIVE 6, chloroplastic/mitochondrial-like isoform X1	noGO	NULL	S
evm.model.scaffold10_size1516488.11	361	4	GDSL esterase/lipase At4g16230-like	GO:0006629 GO:0016021 GO:0004806	Carboxylesterase;Triacylglycerol_lipase	I
evm.model.scaffold10_size1516488.192	454	3	Glycosyltransferase	GO:0080043 GO:0080044 GO:0043231 GO:0016020	NULL	CG
evm.model.scaffold10_size1516488.198	349	1	Protein DMP2-like protein	GO:0009838 GO:0010256 GO:0016020 GO:0003676	NULL	S
evm.model.scaffold10_size1516488.260	393	1	Sulfite oxidase	GO:0015994 GO:0005777 GO:0006790 GO:0030151 GO:0008482 GO:0055114 GO:0010477 GO:0042128	Sulfite_oxidase	C
evm.model.scaffold10_size1516488.9	531	1	hypothetical protein	noGO	NULL	S
evm.model.scaffold10_size1516488.165	663	1	hypothetical protein	noGO	NULL	S
evm.model.scaffold10_size1516488.174	128	1	hypothetical protein	noGO	NULL	S
evm.model.scaffold10_size1516488.253	564	1	C2 calcium-dependent membrane targeting	GO:0050832 GO:0016021	NULL	S
evm.model.scaffold10_size1516488.36	382	1	hypothetical protein	noGO	NULL	S
evm.model.scaffold10_size1516488.15	568	4	protein misato homolog 1-like	GO:0044444	NULL	Z
evm.model.scaffold10_size1516488.193	161	4	28 kDa heat-and acid-stable phosphoprotein	GO:0005829	NULL	S
evm.model.scaffold10_size1516488.315	970	1	Nudix hydrolase 3	GO:0006508 GO:0005829 GO:0004452 GO:0008239	Acting_on_peptide_bonds_(peptidases);Isopentenyl-diphosphate_Delta-isomerase	L
evm.model.scaffold10_size1516488.196	492	1	receptor-like cytosolic serine/threonine-protein kinase RBK2	GO:0005524 GO:0005737 GO:0051020 GO:0007178 GO:0006468 GO:0005886 GO:0004675	Transferring_phosphorus-containing_groups	T
evm.model.scaffold10_size1516488.344	351	1	WAT1-related protein	GO:0005887 GO:0022857 GO:0005938 GO:0009734	NULL	S
evm.model.scaffold10_size1516488.194	149	4	50S ribosomal protein L34, chloroplastic	GO:0003735 GO:0005762 GO:0006412	NULL	J
evm.model.scaffold10_size1516488.145	103	1	Uncharacterized protein	noGO	NULL	S
evm.model.scaffold10_size1516488.235	175	1	Auxin-responsive protein	GO:0003700 GO:0005515 GO:0044212 GO:0006355 GO:0043565 GO:0009734	NULL	K
evm.model.scaffold10_size1516488.12	221	4	MYB transcription factor	GO:0044212 GO:0030154 GO:0043565	NULL	K
evm.model.scaffold10_size1516488.242	660	1	Putative ovule protein (Fragment)	noGO	NULL	none
evm.model.scaffold10_size1516488.303	411	1	Shaggy-related protein kinase alpha	GO:0090502 GO:0003676 GO:0004523 GO:0005524 GO:0042538 GO:1901002 GO:0046777 GO:0005829 GO:0004674 GO:0009933	Acting_on_ester_bonds;Transferring_phosphorus-containing_groups;Acting_on_ester_bonds;Ribonuclease_H	T
evm.model.scaffold1100_size17457.1	714	1	protein RST1 isoform X2	GO:0007275	NULL	S
evm.model.scaffold1100_size17457.2	470	1	denticleless protein homolog A-like	GO:0005813 GO:0000209 GO:0031464 GO:0031465 GO:0072425 GO:0009411 GO:0019985 GO:0006513 GO:0006511 GO:0005515	NULL	S
evm.model.scaffold1101_size17343.5	375	1	V-type proton ATPase subunit C	GO:0000221 GO:0009507 GO:0009826 GO:0042626 GO:0043492 GO:1902600 GO:0022853 GO:0008553 GO:0015405 GO:0005886	Adenosinetriphosphatase;P-type_H(+)-exporting_transporter;Nucleoside-triphosphate_phosphatase	C
evm.model.scaffold1101_size17343.1	216	1	Uncharacterized protein	noGO	NULL	S
evm.model.scaffold1102_size17337.4	414	1	Polygalacturonase	GO:0005576 GO:0004650 GO:0005975 GO:0071555	Polygalacturonase	G
evm.model.scaffold1102_size17337.6	497	1	Protein DETOXIFICATION	GO:0042910 GO:0006855 GO:0015297 GO:0016021	NULL	V
evm.model.scaffold1102_size17337.1	148	1	GATA transcription factor 15-like	GO:0005667 GO:0008270 GO:0001085 GO:0000977 GO:0030154 GO:0001228 GO:0003682 GO:0045944	NULL	K
evm.model.scaffold1102_size17337.3	421	1	U6 snRNA phosphodiesterase	GO:0090503 GO:1990879 GO:0034477 GO:1990838 GO:0003697	Acting_on_ester_bonds;Acting_on_ester_bonds	J
evm.model.scaffold1102_size17337.2	645	1	COBRA-like protein 7	GO:0005802 GO:0009506 GO:0010215 GO:0016021 GO:0048765 GO:0009932 GO:0046658	NULL	S
evm.model.scaffold1105_size17072.5	278	1	Protein NYNRIN-like protein	noGO	NULL	L
evm.model.scaffold1105_size17072.6	195	1	hypothetical protein	noGO	NULL	S
evm.model.scaffold1105_size17072.2	95	1	Uncharacterized protein (Fragment)	noGO	NULL	S
evm.model.scaffold1106_size16974.6	573	1	Phosphatidylinositol 4-kinase gamma 4	GO:0004430 GO:0005515 GO:0046854	1-phosphatidylinositol_4-kinase	G
evm.model.scaffold1106_size16974.7	939	1	protein TSS	GO:0005515	NULL	S
evm.model.scaffold1108_size16952.1	120	1	Patatin	GO:0004620 GO:0047372 GO:0006629	Acylglycerol_lipase;Carboxylesterase	I
evm.model.scaffold1109_size16905.2	569	1	protein FRIGIDA-ESSENTIAL 1-like	GO:0010220 GO:0046872	NULL	S
evm.model.scaffold1109_size16905.4	129	3	ethylene-responsive transcription factor 12-like	GO:0003677 GO:0003700 GO:0006355 GO:0009873	NULL	K
evm.model.scaffold110_size649966.114	293	1	hypothetical protein	noGO	NULL	S
evm.model.scaffold110_size649966.113	124	1	hypothetical protein	noGO	NULL	S
evm.model.scaffold110_size649966.159	75	1	Tubulin glycylase	noGO	NULL	none
evm.model.scaffold110_size649966.24	506	1	Putative glycosyltransferase	GO:0016021 GO:0016757 GO:0006486	NULL	GMW
evm.model.scaffold110_size649966.53	329	1	Uncharacterized protein	noGO	NULL	S
evm.model.scaffold110_size649966.66	226	1	hypothetical protein	noGO	NULL	S
evm.model.scaffold110_size649966.145	600	1	Putative dehydrogenase	GO:0009570 GO:0051082 GO:0032981	NULL	G
evm.model.scaffold110_size649966.18	262	3	RING-H2 finger protein ATL52-like	noGO	NULL	O
evm.model.scaffold110_size649966.92	271	1	AT-hook motif nuclear-localized protein	GO:0003680 GO:0003700 GO:0050789	NULL	K
evm.model.scaffold110_size649966.97	393	1	IST1-like protein	GO:0015031	NULL	Z
evm.model.scaffold110_size649966.93	806	1	U4/U6 small nuclear ribonucleoprotein Prp3-like	GO:0044030 GO:0009793 GO:0046540 GO:0000398 GO:0005654	NULL	A
evm.model.scaffold110_size649966.164	260	1	Nuclease S1	GO:0003676 GO:0090305 GO:0006308 GO:0004536 GO:0004519	NULL	S
evm.model.scaffold110_size649966.95	193	Singleton	Upf0548 protein	GO:0009941	NULL	S
evm.model.scaffold110_size649966.82	161	1	hypothetical protein	noGO	NULL	S
evm.model.scaffold110_size649966.91	284	Singleton	Chloroplast J-like domain 1	GO:0016021 GO:0031969 GO:0006631	NULL	S
evm.model.scaffold110_size649966.19	136	3	Uncharacterized protein	noGO	NULL	S
evm.model.scaffold110_size649966.155	508	1	Calcium-dependent protein kinase 9	GO:0005524 GO:0005516 GO:0009738 GO:0005737 GO:0005509 GO:0046777 GO:0004683 GO:0018105 GO:0035556 GO:0005886 GO:0009931	Transferring_phosphorus-containing_groups;Calcium/calmodulin-dependent_protein_kinase	T
evm.model.scaffold110_size649966.152	1693	1	histone acetyltransferase HAC1-like	GO:0004402 GO:0008270 GO:0003712 GO:0006355 GO:0016573	Arylamine_N-acetyltransferase;Histone_acetyltransferase	K
evm.model.scaffold110_size649966.62	328	1	hypothetical protein	noGO	NULL	S
evm.model.scaffold110_size649966.136	96	1	hypothetical protein	noGO	NULL	S
evm.model.scaffold110_size649966.73	1048	1	116 kDa U5 small nuclear ribonucleoprotein component-like	GO:0009793 GO:0016607 GO:0015030 GO:0048437 GO:0005730 GO:0006414 GO:0005886 GO:0000398 GO:0005525 GO:0030623 GO:0009506 GO:0003746 GO:0003924 GO:0005618 GO:0046540 GO:0071007 GO:0005829	Nucleoside-triphosphate_phosphatase	J
evm.model.scaffold110_size649966.25	462	Singleton	probable 3-deoxy-D-manno-octulosonic acid transferase, mitochondrial isoform X1	GO:0016757 GO:0009245 GO:0005886	NULL	M
evm.model.scaffold110_size649966.4	349	1	Ribosome recycling factor	GO:0005840 GO:0003735 GO:0043023 GO:0006412	NULL	J
evm.model.scaffold110_size649966.149	523	1	NEDD8-activating enzyme E1 regulatory subunit	GO:0006281 GO:0005777 GO:0010252 GO:0007131 GO:0009791 GO:0019781 GO:0005829 GO:0045116 GO:0009735 GO:0009965 GO:0009734 GO:0009414	NULL	O
evm.model.scaffold110_size649966.104	1267	1	Mediator of rna polymerase ii transcription subunit 15a	noGO	NULL	S
evm.model.scaffold110_size649966.76	524	1	hypothetical protein	noGO	NULL	S
evm.model.scaffold110_size649966.98	542	1	MLO-like protein	GO:0009607 GO:0005516 GO:0010483 GO:0005737 GO:0016021 GO:0012505 GO:0006952 GO:0005886	NULL	G
evm.model.scaffold110_size649966.100	192	1	Pentatricopeptide repeat-containing protein, mitochondrial	GO:0090305 GO:0003723 GO:0009451 GO:0004519	NULL	S
evm.model.scaffold110_size649966.45	138	1	hypothetical protein	noGO	NULL	S
evm.model.scaffold110_size649966.118	538	1	hypothetical protein	noGO	NULL	S
evm.model.scaffold110_size649966.112	522	1	Protein DETOXIFICATION	GO:0042910 GO:0006855 GO:0015297 GO:0016021 GO:0048767 GO:0005774 GO:0009624	NULL	V
evm.model.scaffold110_size649966.139	313	2	DNA/RNA polymerases superfamily protein (Fragment)	GO:0003676 GO:0004523 GO:0015074 GO:0090502	Acting_on_ester_bonds;Acting_on_ester_bonds;Ribonuclease_H	L
evm.model.scaffold110_size649966.96	752	1	cation/H(+) antiporter 2-like isoform X1	GO:0015299 GO:1902600 GO:0016021 GO:0012505 GO:0006885	NULL	P
evm.model.scaffold110_size649966.150	516	1	GDSL esterase/lipase At2g04570-like	GO:0016021 GO:0004806	Carboxylesterase;Triacylglycerol_lipase	I
evm.model.scaffold110_size649966.108	875	1	AP-1 complex subunit gamma	GO:0016192 GO:0030121 GO:0006886	NULL	U
evm.model.scaffold110_size649966.103	376	1	acetylajmalan esterase-like	noGO	NULL	S
evm.model.scaffold110_size649966.126	166	1	F-box/kelch-repeat protein	GO:0043161 GO:0005829	NULL	S
evm.model.scaffold110_size649966.137	540	1	Uncharacterized protein	noGO	NULL	L
evm.model.scaffold110_size649966.122	109	1	hypothetical protein	noGO	NULL	S
evm.model.scaffold110_size649966.72	98	1	Uncharacterized protein	noGO	NULL	none
evm.model.scaffold110_size649966.47	155	1	hypothetical protein	noGO	NULL	S
evm.model.scaffold110_size649966.20	191	1	Putative PLATZ transcription factor family protein	noGO	NULL	S
evm.model.scaffold110_size649966.160	260	1	2-phytyl-1,4-beta-naphthoquinone methyltransferase, chloroplastic	GO:0009507 GO:0042372 GO:0032259 GO:0052624	NULL	H
evm.model.scaffold110_size649966.84	260	1	GATA transcription factor 11-like isoform X1	GO:0005667 GO:0008270 GO:0001085 GO:0000977 GO:0030154 GO:0001228 GO:0003682 GO:0045944	NULL	K
evm.model.scaffold110_size649966.123	155	1	hypothetical protein	noGO	NULL	S
evm.model.scaffold110_size649966.163	143	1	Uncharacterized protein	noGO	NULL	none
evm.model.scaffold110_size649966.151	98	1	hypothetical protein	noGO	NULL	S
evm.model.scaffold110_size649966.88	765	1	probable methyltransferase PMT27	GO:0043231 GO:0016021 GO:0012505 GO:0044444 GO:0008757 GO:0044446 GO:0032259	NULL	S
evm.model.scaffold110_size649966.26	530	1	Ferredoxin-dependent glutamate synthase	noGO	NULL	S
evm.model.scaffold110_size649966.86	506	3	Cytochrome p450 84a1	GO:0009809 GO:0005506 GO:0016021 GO:0016709 GO:0055114 GO:0010224 GO:0020037	Acting_on_paired_donors,_with_incorporation_or_reduction_of_molecular_oxygen._The_oxygen_incorporated_need_not_be_derived_from_O(2)	Q
evm.model.scaffold110_size649966.127	304	Singleton	OBP32pep, putative	noGO	NULL	S
evm.model.scaffold110_size649966.165	147	1	Putative translocase subunit seca-like	noGO	NULL	none
evm.model.scaffold110_size649966.94	200	1	GRF1-interacting factor 1-like	GO:0008283 GO:0003713 GO:0048366 GO:0048316 GO:0045944 GO:0009955	NULL	K
evm.model.scaffold110_size649966.99	271	1	Calcium homeostasis regulator CHoR1	GO:0009570 GO:0048564 GO:0009941 GO:0098572 GO:0009535	NULL	S
evm.model.scaffold110_size649966.89	991	1	auxilin-like protein 1	noGO	NULL	S
evm.model.scaffold110_size649966.144	630	1	protein CHUP1, chloroplastic	noGO	NULL	S
evm.model.scaffold110_size649966.106	234	1	RING/U-box superfamily protein	noGO	NULL	O
evm.model.scaffold110_size649966.87	506	3	Cytochrome p450 84a1	GO:0009809 GO:0005506 GO:0016021 GO:0016709 GO:0055114 GO:0010224 GO:0020037	Acting_on_paired_donors,_with_incorporation_or_reduction_of_molecular_oxygen._The_oxygen_incorporated_need_not_be_derived_from_O(2)	Q
evm.model.scaffold110_size649966.65	155	1	hypothetical protein	noGO	NULL	S
evm.model.scaffold110_size649966.16	164	1	hypothetical protein	noGO	NULL	S
evm.model.scaffold110_size649966.110	187	1	Chlorophyll A-B binding protein	GO:0009535 GO:0016021	NULL	O
evm.model.scaffold110_size649966.131	311	2	uncharacterized protein LOC104598722	noGO	NULL	L
evm.model.scaffold110_size649966.46	115	1	Uncharacterized protein	noGO	NULL	L
evm.model.scaffold110_size649966.22	96	1	hypothetical protein	noGO	NULL	S
evm.model.scaffold110_size649966.21	481	1	DEAD-box ATP-dependent RNA helicase 38	GO:0008186 GO:0005730 GO:0005886 GO:0005635 GO:0003676 GO:0009409 GO:0005524 GO:0009408 GO:0009737 GO:0003724 GO:0070035 GO:0005737 GO:0010501 GO:0016021 GO:0016973	Adenosinetriphosphatase;RNA_helicase;Nucleoside-triphosphate_phosphatase	A
evm.model.scaffold110_size649966.28	313	1	Serine/threonine-protein phosphatase 7 long form	noGO	NULL	S
evm.model.scaffold110_size649966.101	426	1	Protease do-like 1, chloroplastic	GO:0042802 GO:0031977 GO:0030163 GO:0006508 GO:0004252 GO:0010206 GO:0009735 GO:0009535	Acting_on_peptide_bonds_(peptidases)	O
evm.model.scaffold110_size649966.83	712	1	Anaphase-promoting complex (APC), subunit 11	noGO	NULL	O
evm.model.scaffold110_size649966.148	288	Singleton	protein usf-like	GO:0008806	Carboxymethylenebutenolidase;Carboxylesterase	Q
evm.model.scaffold110_size649966.29	356	1	cysteine proteinase COT44-like	GO:0005615 GO:0004197 GO:0051603 GO:0005764	Acting_on_peptide_bonds_(peptidases)	O
evm.model.scaffold110_size649966.158	838	1	DExH-box ATP-dependent RNA helicase DExH6-like isoform X1	GO:0016021 GO:0003723 GO:0004386 GO:0005524	Adenosinetriphosphatase;Nucleoside-triphosphate_phosphatase	A
evm.model.scaffold110_size649966.48	182	1	Uncharacterized protein	noGO	NULL	L
evm.model.scaffold110_size649966.57	116	1	Uncharacterized protein	noGO	NULL	L
evm.model.scaffold110_size649966.17	167	1	hypothetical protein	noGO	NULL	S
evm.model.scaffold110_size649966.67	128	1	Uncharacterized protein	noGO	NULL	S
evm.model.scaffold110_size649966.74	642	1	BEL1-like homeodomain protein 8	GO:0003677 GO:0010077 GO:0003700 GO:0010076 GO:0010229 GO:0006355 GO:0010228 GO:0080006 GO:0010223	NULL	K
evm.model.scaffold110_size649966.90	539	1	serine/threonine protein phosphatase 2A regulatory subunit Bbeta-like	GO:0005829 GO:0005509 GO:0043666 GO:0000159 GO:0019888	NULL	A
evm.model.scaffold1110_size16795.2	485	1	calcium-dependent protein kinase 32-like	GO:0005524 GO:0005516 GO:0009738 GO:0005737 GO:0005509 GO:0016021 GO:0046777 GO:0004683 GO:0018105 GO:0035556 GO:0005886 GO:0009931	Transferring_phosphorus-containing_groups;Calcium/calmodulin-dependent_protein_kinase	T
evm.model.scaffold1111_size16767.3	144	1	Uncharacterized protein	noGO	NULL	S
evm.model.scaffold1113_size16751.3	640	1	Putative beta-1,3-galactosyltransferase 16	GO:0047220 GO:0010405 GO:0048354 GO:0016021 GO:1990714 GO:0080147 GO:0030246 GO:0018258	Galactosylxylosylprotein_3-beta-galactosyltransferase	G
evm.model.scaffold1114_size16698.3	478	1	Homeobox-ddt domain protein rlt1	GO:0003677	NULL	K
evm.model.scaffold1114_size16698.1	728	1	Pentatricopeptide repeat-containing protein	GO:0090305 GO:0003723 GO:0009451 GO:0004519 GO:0032543 GO:0005515	NULL	S
evm.model.scaffold1114_size16698.2	337	1	signal peptide peptidase-like	GO:0042803 GO:1904211 GO:0009555 GO:0005791 GO:0006465 GO:0009846 GO:0042500 GO:0005765 GO:0031625 GO:0051289 GO:0030660 GO:0071556 GO:0071458 GO:0036513 GO:0098827	Acting_on_peptide_bonds_(peptidases)	S
evm.model.scaffold1115_size16693.1	128	1	putative late blight resistance protein homolog R1B-19	GO:0046872 GO:0030001	NULL	P
evm.model.scaffold1116_size16635.1	123	4	Copper ion-binding protein	GO:0005747 GO:0005507 GO:0005730	NULL	S
evm.model.scaffold1116_size16635.4	497	4	internal alternative NAD(P)H-ubiquinone oxidoreductase A1, mitochondrial	GO:0071482 GO:0005777 GO:0003954 GO:0005759 GO:0003959 GO:0055114 GO:0031304	NADH_dehydrogenase;NADPH_dehydrogenase	C
evm.model.scaffold1116_size16635.2	390	4	mRNA-decapping enzyme-like protein	GO:0031087 GO:0043085 GO:0000290 GO:0000932 GO:0003729 GO:0008047 GO:0006952	NULL	AK
evm.model.scaffold1116_size16635.3	232	4	V-type proton ATPase subunit E	GO:0042626 GO:0009651 GO:0009793 GO:0007030 GO:1902600 GO:0022853 GO:0008553 GO:0046961 GO:0042742 GO:0009735 GO:0042788 GO:0009409 GO:0003735 GO:0043492 GO:0033178 GO:0015405	Adenosinetriphosphatase;P-type_H(+)-exporting_transporter;Nucleoside-triphosphate_phosphatase	C
evm.model.scaffold1117_size16596.2	521	1	sialidase isoform X1	noGO	NULL	none
evm.model.scaffold1117_size16596.1	289	1	kinesin-1-like isoform X2	noGO	NULL	none
evm.model.scaffold1118_size16570.3	95	1	Ubiquitin-fold modifier 1	GO:0005737 GO:1990592	NULL	S
evm.model.scaffold1119_size16554.7	305	1	hypothetical protein	noGO	NULL	S
evm.model.scaffold111_size649699.62	214	4	Glutathione S-transferase	GO:0009570 GO:0010043 GO:0009651 GO:0004364 GO:0005774 GO:0009414 GO:0009579 GO:0009409 GO:0006979 GO:0009407 GO:0009506 GO:0002239 GO:0005507 GO:0043295 GO:0005829 GO:2001227 GO:0050897 GO:2001147 GO:0019904 GO:0009941 GO:0080167 GO:0046686 GO:0042742 GO:0005886 GO:0009817 GO:0006749 GO:0005618	Glutathione_transferase	O
evm.model.scaffold111_size649699.128	424	1	Calreticulin	GO:0005788 GO:0006979 GO:0009507 GO:0009506 GO:0009651 GO:0046686 GO:0005774 GO:0005525 GO:0016192 GO:0005509 GO:0051082 GO:0006886 GO:0006457	NULL	O
evm.model.scaffold111_size649699.15	93	1	hypothetical protein	noGO	NULL	S
evm.model.scaffold111_size649699.68	270	1	sphinganine C4-monooxygenase 1-like	GO:0005789 GO:0000254 GO:0005506 GO:0046520 GO:0042284 GO:0000170 GO:0016021 GO:0055114 GO:0098827	Acting_on_paired_donors,_with_incorporation_or_reduction_of_molecular_oxygen._The_oxygen_incorporated_need_not_be_derived_from_O(2);Acting_on_paired_donors,_with_incorporation_or_reduction_of_molecular_oxygen._The_oxygen_incorporated_need_not_be_derived_from_O(2)	I
evm.model.scaffold111_size649699.23	381	1	serine/threonine-protein kinase OXI1-like	GO:0019901 GO:0006979 GO:0005524 GO:0005737 GO:0009611 GO:0004674 GO:0006468 GO:0035556 GO:0005886	Transferring_phosphorus-containing_groups	T
evm.model.scaffold111_size649699.90	93	3	E3 ubiquitin ligase BIG BROTHER-like	GO:0090090 GO:0005887 GO:0004842 GO:0005109 GO:0072089 GO:2000051 GO:0060071 GO:0038018 GO:0016567 GO:0006511	NULL	O
evm.model.scaffold111_size649699.29	950	4	Cohesin loading factor	GO:0005515 GO:0009793 GO:0005737 GO:0034088 GO:0003690 GO:0000785 GO:0032116	NULL	S
evm.model.scaffold111_size649699.149	219	4	protein MKS1-like	noGO	NULL	S
evm.model.scaffold111_size649699.75	205	1	hypothetical protein	noGO	NULL	S
evm.model.scaffold111_size649699.65	214	3	Glutathione S-transferase	GO:0009570 GO:0010043 GO:0009651 GO:0004364 GO:0005774 GO:0009414 GO:0009579 GO:0009409 GO:0006979 GO:0009407 GO:0009506 GO:0002239 GO:0005507 GO:0043295 GO:0005829 GO:2001227 GO:0050897 GO:2001147 GO:0019904 GO:0009941 GO:0080167 GO:0046686 GO:0042742 GO:0005886 GO:0009817 GO:0006749 GO:0005618	Glutathione_transferase	O
evm.model.scaffold111_size649699.139	716	1	sterol 3-beta-glucosyltransferase UGT80B1 isoform X1	GO:0102203 GO:0080043 GO:0051509 GO:0080044 GO:0102205 GO:0015020 GO:0005774 GO:0009813 GO:0009845 GO:0005975 GO:0051507 GO:0016021 GO:0051508 GO:0051505 GO:0102202 GO:0051506 GO:0016125 GO:0030259	Sterol_3-beta-glucosyltransferase;Glucuronosyltransferase	CG
evm.model.scaffold111_size649699.2	310	2	hypothetical protein	noGO	NULL	S
evm.model.scaffold111_size649699.85	294	1	NAC domain-containing protein	GO:0003677 GO:0003700 GO:0005737 GO:1900057 GO:0006355 GO:1903648	NULL	K
evm.model.scaffold111_size649699.92	97	1	Serine/threonine-protein phosphatase 7 long form	noGO	NULL	S
evm.model.scaffold111_size649699.36	571	3	protein NRT1/ PTR FAMILY 8.1-like	GO:0035672 GO:0015333 GO:0009506 GO:0042937 GO:0006807 GO:0042938 GO:0042939 GO:1902600 GO:0016021 GO:0005886	NULL	E
evm.model.scaffold111_size649699.55	108	4	Small nuclear ribonucleoprotein Sm D2	GO:0071013 GO:0046540 GO:0005682 GO:0005686 GO:0005685 GO:0000387	NULL	A
evm.model.scaffold111_size649699.143	635	1	S-locus glycoprotein	noGO	NULL	L
evm.model.scaffold111_size649699.41	260	4	DeSI-like protein	noGO	NULL	S
evm.model.scaffold111_size649699.93	144	1	hypothetical protein	noGO	NULL	S
evm.model.scaffold111_size649699.154	524	4	scarecrow-like protein 1	GO:0003700 GO:0006355 GO:0043565	NULL	K
evm.model.scaffold111_size649699.144	100	1	Uncharacterized protein	noGO	NULL	S
evm.model.scaffold111_size649699.140	354	1	Putative UPF0496 protein 4-like	GO:0016021	NULL	S
evm.model.scaffold111_size649699.91	123	1	Uncharacterized protein	GO:0008083	NULL	S
evm.model.scaffold111_size649699.19	309	1	Uncharacterized protein	noGO	NULL	S
evm.model.scaffold111_size649699.169	483	1	Putative WEB family protein, chloroplastic	GO:0007131	NULL	S
evm.model.scaffold111_size649699.147	373	1	WAT1-related protein	GO:0022857 GO:0016021	NULL	S
evm.model.scaffold111_size649699.12	462	1	Non-specific serine/threonine protein kinase	GO:0003824	NULL	S
evm.model.scaffold111_size649699.1	361	1	Uncharacterized protein	noGO	NULL	S
evm.model.scaffold111_size649699.84	98	1	Putative ovule protein	noGO	NULL	none
evm.model.scaffold111_size649699.101	490	1	Uncharacterized protein	noGO	NULL	L
evm.model.scaffold111_size649699.34	521	1	UPF0503 protein At3g09070, chloroplastic-like	noGO	NULL	S
evm.model.scaffold111_size649699.33	453	4	Putative RNA-binding protein C25G10.01	GO:0003723 GO:0043484 GO:0009644 GO:1990904	NULL	S
evm.model.scaffold111_size649699.64	214	3	Glutathione S-transferase	GO:0009570 GO:0010043 GO:0009651 GO:0004364 GO:0005774 GO:0009414 GO:0009579 GO:0009409 GO:0006979 GO:0009407 GO:0009506 GO:0002239 GO:0005507 GO:0043295 GO:0005829 GO:2001227 GO:0050897 GO:2001147 GO:0019904 GO:0009941 GO:0080167 GO:0046686 GO:0042742 GO:0005886 GO:0009817 GO:0006749 GO:0005618	Glutathione_transferase	O
evm.model.scaffold111_size649699.131	733	1	Zinc finger CCCH domain-containing protein 55	GO:0046872	NULL	S
evm.model.scaffold111_size649699.138	1088	1	Cellulose synthase	GO:0005887 GO:0009825 GO:0046872 GO:0016760 GO:0030244 GO:0071555 GO:0043622 GO:0009833	Cellulose_synthase_(UDP-forming)	G
evm.model.scaffold111_size649699.43	110	4	60S ribosomal protein L36	GO:0003723 GO:0003735 GO:0002181 GO:0005774	NULL	J
evm.model.scaffold111_size649699.27	895	4	auxilin-related protein 2	GO:0045926 GO:1900186 GO:0005829 GO:0031982 GO:0009504 GO:0005886	NULL	S
evm.model.scaffold111_size649699.40	178	4	40S ribosomal protein S10-1-like	GO:0009507 GO:0010252 GO:0003735 GO:2000032 GO:0005618 GO:0016020 GO:0003729 GO:0000028 GO:0090506 GO:0042788	NULL	J
evm.model.scaffold111_size649699.172	204	1	Chitinase-like protein 2	GO:0010053 GO:0016998 GO:0090379 GO:0009651 GO:0006032 GO:0009531 GO:0009735 GO:0009414 GO:0001871 GO:0004568 GO:0009408 GO:0009825 GO:0016021 GO:0030244 GO:0010337 GO:0010167 GO:0030247	Chitinase	S
evm.model.scaffold111_size649699.22	259	1	Cytochrome b561 and DOMON domain-containing protein	GO:0005886	NULL	T
evm.model.scaffold111_size649699.47	327	4	protein EXORDIUM-like 3	GO:0009506 GO:0080167 GO:0016021	NULL	S
evm.model.scaffold111_size649699.87	124	1	RING/U-box superfamily protein	GO:0090090 GO:0005887 GO:0004842 GO:0005109 GO:0072089 GO:2000051 GO:0060071 GO:0038018 GO:0016567 GO:0006511	NULL	O
evm.model.scaffold111_size649699.111	188	1	hypothetical protein	noGO	NULL	S
evm.model.scaffold111_size649699.74	344	1	hypothetical protein	noGO	NULL	S
evm.model.scaffold111_size649699.39	798	4	ATP-dependent zinc metalloprotease FTSH 7, chloroplastic	GO:0051301 GO:0005524 GO:0008270 GO:0006508 GO:0009941 GO:0016021 GO:0004176 GO:0004222	Acting_on_peptide_bonds_(peptidases);Adenosinetriphosphatase;Nucleoside-triphosphate_phosphatase	O
evm.model.scaffold111_size649699.123	838	1	Leishmanolysin-like peptidase (Peptidase M8 family)	GO:0007076 GO:0007052 GO:0045842 GO:0007100 GO:0007155 GO:0007420 GO:0008354 GO:0004222 GO:0006338 GO:0008406 GO:0051781 GO:0005737 GO:0051298 GO:0016021 GO:0032436	Acting_on_peptide_bonds_(peptidases)	MTVW
evm.model.scaffold111_size649699.86	378	1	homeobox protein knotted-1-like LET12 isoform X1	GO:0003677 GO:0006355	NULL	K
evm.model.scaffold111_size649699.106	570	1	hypothetical protein	noGO	NULL	S
evm.model.scaffold111_size649699.158	280	4	BTB/POZ domain-containing protein	GO:0005524 GO:0043161 GO:0031625 GO:0005737 GO:0030162 GO:0019005 GO:0004672 GO:0006468 GO:0016567	NULL	D
evm.model.scaffold111_size649699.135	972	1	DIS3-like exonuclease 2	GO:0090503 GO:0019827 GO:0008285 GO:0000932 GO:0006364 GO:0008266 GO:1990074 GO:0000178 GO:0000287 GO:0005844 GO:0000175 GO:0051306 GO:0034427 GO:0010587	Acting_on_ester_bonds;Acting_on_ester_bonds	J
evm.model.scaffold111_size649699.38	715	4	Dentin sialophosphoprotein-like	noGO	NULL	S
evm.model.scaffold111_size649699.110	277	1	OSJNBb0013O03.9 protein	noGO	NULL	L
evm.model.scaffold111_size649699.46	814	4	Asparagine--tRNA ligase, cytoplasmic 1-like	GO:0009507 GO:0009793 GO:0005829 GO:0046686 GO:0005524 GO:0003723 GO:0004816 GO:0006421	Asparagine--tRNA_ligase	J
evm.model.scaffold111_size649699.42	130	4	actin-depolymerizing factor 7	GO:0003779 GO:0005737 GO:0030042 GO:0005884	NULL	Z
evm.model.scaffold111_size649699.10	60	1	hypothetical protein	noGO	NULL	S
evm.model.scaffold111_size649699.124	354	1	ABSCISIC ACID-INSENSITIVE 5-like protein 5	GO:0003700 GO:0009651 GO:0044212 GO:0006355 GO:0043565 GO:0009789 GO:0009414	NULL	K
evm.model.scaffold111_size649699.122	732	1	Uncharacterized protein	noGO	NULL	S
evm.model.scaffold111_size649699.88	188	3	Putative E3 ubiquitin-protein ligase RHY1A	GO:0090090 GO:0005887 GO:0004842 GO:0005109 GO:0072089 GO:2000051 GO:0060071 GO:0038018 GO:0016567 GO:0006511	NULL	O
evm.model.scaffold111_size649699.156	441	4	probable glucuronoxylan glucuronosyltransferase F8H	GO:0005802 GO:0006486 GO:0102983	Xylogalacturonan_beta-1,3-xylosyltransferase	GMW
evm.model.scaffold111_size649699.137	253	1	protein LIKE COV 2	GO:0005802 GO:0016021 GO:0010222	NULL	S
evm.model.scaffold111_size649699.152	204	2	protein MKS1-like	noGO	NULL	S
evm.model.scaffold111_size649699.155	575	4	Small RNA degrading nuclease 5	GO:0003676 GO:0008859 GO:0090503	Acting_on_ester_bonds;Acting_on_ester_bonds;Exoribonuclease_II	L
evm.model.scaffold111_size649699.54	125	4	Ribosomal protein L22e	GO:0009506 GO:0003735 GO:0002181 GO:0003729 GO:0005730 GO:0005886 GO:0042788	NULL	J
evm.model.scaffold111_size649699.89	93	3	E3 ubiquitin ligase BIG BROTHER-like	GO:0090090 GO:0005887 GO:0004842 GO:0005109 GO:0072089 GO:2000051 GO:0060071 GO:0038018 GO:0016567 GO:0006511	NULL	O
evm.model.scaffold111_size649699.127	350	1	GDP-mannose transporter GONST3-like	GO:0015780 GO:0008643 GO:0016021	NULL	GOU
evm.model.scaffold111_size649699.6	332	2	hypothetical protein	noGO	NULL	S
evm.model.scaffold111_size649699.57	108	2	Small nuclear ribonucleoprotein Sm D2	GO:0071013 GO:0046540 GO:0005682 GO:0005686 GO:0005685 GO:0000387	NULL	A
evm.model.scaffold111_size649699.129	208	1	HMG-Y-related protein A	GO:0003677 GO:0006355 GO:0005730 GO:0000786 GO:0006334	NULL	K
evm.model.scaffold111_size649699.126	1082	1	NHL repeat-containing protein 2	GO:0009570 GO:0010196 GO:0009534 GO:0042651 GO:0005515 GO:0016787 GO:0045454	NULL	O
evm.model.scaffold111_size649699.125	186	1	Transcription factor HEC1	GO:0048462 GO:0003700 GO:0045893 GO:0010500 GO:0046983 GO:0043565 GO:0080126	NULL	K
evm.model.scaffold111_size649699.37	253	1	DIV1A protein	GO:0003677 GO:0048262	NULL	K
evm.model.scaffold111_size649699.165	547	1	hypothetical protein	noGO	NULL	S
evm.model.scaffold1121_size16516.4	693	1	SUN domain-containing protein 2-like	GO:0016020	NULL	S
evm.model.scaffold1122_size16511.3	621	1	elongator complex protein 2-like	GO:0005515 GO:0016573 GO:0044030 GO:1901535	NULL	BK
evm.model.scaffold1122_size16511.4	280	1	Putative e3 ubiquitin-protein ligase hip1	GO:0061630	NULL	O
evm.model.scaffold1122_size16511.2	282	1	Putative ribose-5-phosphate isomerase 2	GO:0009052 GO:0008219 GO:0055085 GO:0080167 GO:0016021 GO:0005829 GO:0030244 GO:0010228 GO:0046109 GO:0004751	Ribose-5-phosphate_isomerase	G
evm.model.scaffold1123_size16487.3	566	1	Proline--tRNA ligase	GO:0009570 GO:0005524 GO:0010109 GO:0004827 GO:0048316 GO:0017101 GO:0009553 GO:0048481 GO:0006433	Proline--tRNA_ligase	J
evm.model.scaffold1124_size16449.3	144	1	Basic-leucine zipper transcription factor	GO:0003700 GO:0006355	NULL	S
evm.model.scaffold1124_size16449.4	348	1	Zinc finger CCCH domain-containing protein 2	GO:0010187 GO:0003700 GO:0010494 GO:0000932 GO:0006355 GO:0046872	NULL	S
evm.model.scaffold1125_size16441.3	1557	1	Nuclear receptor corepressor 1 isoform B	GO:2000191 GO:0016922 GO:0042826 GO:0044212 GO:1903799 GO:0007623 GO:0046329 GO:0000981 GO:0005654 GO:0046966 GO:0001102 GO:0030811 GO:0005876 GO:0072362 GO:0051225 GO:0000790 GO:0001085 GO:0003714 GO:0017053 GO:0051196 GO:0005829 GO:0072368 GO:0019216 GO:2001169	NULL	K
evm.model.scaffold1125_size16441.2	330	1	CDP-diacylglycerol--glycerol-3-phosphate 3-phosphatidyltransferase	GO:0046474 GO:0009941 GO:0016021 GO:0010027 GO:0008444 GO:0030145	CDP-diacylglycerol--glycerol-3-phosphate_1-phosphatidyltransferase	I
evm.model.scaffold1125_size16441.1	388	1	serine/threonine-protein kinase CDL1-like	GO:0009816 GO:0018108 GO:0005524 GO:0004715 GO:0046777 GO:0007178 GO:0002221 GO:0005886 GO:0004675	Transferring_phosphorus-containing_groups;Transferring_phosphorus-containing_groups;Non-specific_protein-tyrosine_kinase	T
evm.model.scaffold1126_size16433.3	378	1	pentatricopeptide repeat-containing protein At3g54980, mitochondrial-like	GO:0090305 GO:0003723 GO:0009451 GO:0004519 GO:0043231 GO:0005515	NULL	S
evm.model.scaffold1126_size16433.7	252	4	Glucan endo-1,3-beta-glucosidase	GO:0004553 GO:0001871 GO:0046658 GO:0030247	NULL	S
evm.model.scaffold1126_size16433.8	499	4	Mitogen-activated protein kinase	GO:0003677 GO:0005524 GO:0005737 GO:0010468 GO:0004707 GO:0000786 GO:0006334	Transferring_phosphorus-containing_groups;Mitogen-activated_protein_kinase	T
evm.model.scaffold1126_size16433.4	153	4	NifU-like protein 3, chloroplastic (Fragment)	GO:0005506 GO:0051536 GO:0016226	NULL	none
evm.model.scaffold1126_size16433.6	381	4	Nuclear envelope-associated protein 2 isoform A	GO:0005635 GO:0043621 GO:0005654	NULL	S
evm.model.scaffold1127_size16359.5	805	1	serine/threonine-protein kinase dst1	GO:0008283 GO:0043408 GO:0031098 GO:0007266 GO:0044444 GO:0004674 GO:0007346 GO:0005524 GO:0043231 GO:0048365 GO:0032147 GO:0016477 GO:0012501 GO:0030036	Transferring_phosphorus-containing_groups	T
evm.model.scaffold1127_size16359.4	549	1	Fructokinase-like 2, chloroplastic	GO:0009662 GO:0000427 GO:0016021 GO:0042793 GO:0019200 GO:0006355 GO:0016310 GO:0016773 GO:0009658 GO:0042644	NULL	G
evm.model.scaffold1127_size16359.1	979	1	DNA-directed RNA polymerase	GO:0006390 GO:0003677 GO:0003899 GO:0034245	DNA-directed_RNA_polymerase	K
evm.model.scaffold1127_size16359.3	510	1	Folate synthesis bifunctional protein, mitochondrial	GO:0006979 GO:0003848 GO:0005829 GO:0046654 GO:0016310 GO:0004156 GO:0016301	Dihydropteroate_synthase;2-amino-4-hydroxy-6-hydroxymethyldihydropteridine_diphosphokinase	H
evm.model.scaffold1128_size16281.2	193	1	adenine phosphoribosyltransferase 5-like	GO:0015114 GO:0003999 GO:0009116 GO:0006168 GO:0005829 GO:0035435 GO:0005886	Adenine_phosphoribosyltransferase	F
evm.model.scaffold1128_size16281.3	584	1	Putative sugar phosphate/phosphate translocator	GO:0005802 GO:0016021 GO:0015297 GO:0008643 GO:0055085	NULL	EG
evm.model.scaffold112_size645884.143	197	Singleton	CASP-like protein	GO:0051536 GO:0044464	NULL	S
evm.model.scaffold112_size645884.10	498	4	protein WVD2-like 4	noGO	NULL	S
evm.model.scaffold112_size645884.52	1335	3	Poly(A) RNA polymerase	GO:0071035 GO:0031123 GO:0043023 GO:0016077 GO:0016078 GO:0043630 GO:0005730 GO:1990817 GO:0031499	Polynucleotide_adenylyltransferase	L
evm.model.scaffold112_size645884.95	1503	4	DNA-directed RNA polymerase subunit	GO:0010495 GO:0000418 GO:0044451 GO:0071359 GO:0030422 GO:0005666 GO:0003677 GO:0003899 GO:0006351	DNA-directed_RNA_polymerase	K
evm.model.scaffold112_size645884.110	193	1	MICOS complex subunit mic25a like	noGO	NULL	none
evm.model.scaffold112_size645884.23	210	1	Uncharacterized protein	noGO	NULL	S
evm.model.scaffold112_size645884.46	399	1	Putative ovule protein	noGO	NULL	S
evm.model.scaffold112_size645884.51	1335	3	Poly(A) RNA polymerase	GO:0071035 GO:0031123 GO:0043023 GO:0016077 GO:0016078 GO:0043630 GO:0005730 GO:1990817 GO:0031499	Polynucleotide_adenylyltransferase	L
evm.model.scaffold112_size645884.49	272	1	65-kDa microtubule-associated protein 1-like	GO:0008283 GO:0009574 GO:0072686 GO:1902410 GO:0000922 GO:0046983 GO:0043622 GO:0055028 GO:0048528 GO:0009524 GO:0008017	NULL	DZ
evm.model.scaffold112_size645884.117	332	3	Vestitone reductase	GO:0050662 GO:0016616 GO:0055114	NULL	V
evm.model.scaffold112_size645884.71	118	1	hypothetical protein	noGO	NULL	S
evm.model.scaffold112_size645884.87	166	1	hypothetical protein	noGO	NULL	S
evm.model.scaffold112_size645884.5	593	4	protein downstream neighbor of Son	noGO	NULL	KL
evm.model.scaffold112_size645884.93	346	4	UDP-galactose/UDP-glucose transporter 4	GO:0030173 GO:0030176 GO:0008643 GO:0046964 GO:0098791 GO:0098827 GO:1902559	NULL	G
evm.model.scaffold112_size645884.105	433	1	Sodium/pyruvate cotransporter BASS2, chloroplastic	GO:0006849 GO:0009534 GO:0009941 GO:0016021 GO:0050833	NULL	P
evm.model.scaffold112_size645884.54	955	1	Glycosyltransferase	GO:0090502 GO:0003676 GO:0004523 GO:0010306 GO:0035250 GO:0035252 GO:0006486 GO:0016021 GO:0000139 GO:0048868	Acting_on_ester_bonds;Acting_on_ester_bonds;Ribonuclease_H	G
evm.model.scaffold112_size645884.62	278	1	hypothetical protein	noGO	NULL	S
evm.model.scaffold112_size645884.2	886	4	FAD-linked oxidases family protein isoform 1	GO:0004458 GO:0071949 GO:0005524 GO:0042802 GO:0051596 GO:0008891 GO:0019154 GO:0008720 GO:0016021 GO:0055114	D-lactate_dehydrogenase_(cytochrome);(S)-2-hydroxy-acid_oxidase;Glycolate_dehydrogenase;D-lactate_dehydrogenase	C
evm.model.scaffold112_size645884.48	339	4	hypothetical protein	noGO	NULL	S
evm.model.scaffold112_size645884.76	141	1	Cyclin-A1-1 (Fragment)	GO:0005515 GO:0050794 GO:0005737	NULL	D
evm.model.scaffold112_size645884.124	1613	1	probable phosphoinositide phosphatase SAC9	GO:0009506 GO:0006970 GO:0016021 GO:0060548 GO:0004672 GO:0046488 GO:0006468 GO:0042742 GO:0031348 GO:0042578 GO:0033612 GO:0005886	NULL	I
evm.model.scaffold112_size645884.106	275	1	Glycine-rich protein	noGO	NULL	S
evm.model.scaffold112_size645884.118	332	3	Vestitone reductase	GO:0050662 GO:0016616 GO:0055114	NULL	V
evm.model.scaffold112_size645884.15	106	1	hypothetical protein	noGO	NULL	S
evm.model.scaffold112_size645884.18	106	1	Uncharacterized protein	GO:0006807 GO:0043170 GO:0044238	NULL	L
evm.model.scaffold112_size645884.72	97	1	Uncharacterized protein	noGO	NULL	S
evm.model.scaffold112_size645884.20	686	1	Lysosomal beta glucosidase-like	GO:0009251 GO:0004338 GO:0102483	Beta-glucosidase;Glucan_1,3-beta-glucosidase	G
evm.model.scaffold112_size645884.121	632	1	Phosphatidate cytidylyltransferase	GO:0004605 GO:0009941 GO:0016021 GO:0016024 GO:0006655 GO:0009535	Phosphatidate_cytidylyltransferase	I
evm.model.scaffold112_size645884.33	718	1	Putative acyl-activating enzyme 17, peroxisomal	GO:0005777 GO:0003987 GO:0016021	Acetate--CoA_ligase	I
evm.model.scaffold112_size645884.27	94	1	hypothetical protein	noGO	NULL	S
evm.model.scaffold112_size645884.142	1061	1	protein transport protein Sec24-like At4g32640	GO:0006979 GO:0005829 GO:0030127 GO:0008270 GO:0006886 GO:0006888	NULL	U
evm.model.scaffold112_size645884.91	438	4	Putative micro-fibrillar-associated protein	noGO	NULL	Z
evm.model.scaffold112_size645884.84	108	1	hypothetical protein	noGO	NULL	S
evm.model.scaffold112_size645884.114	283	3	2-methylene-furan-3-one reductase-like	GO:0032440 GO:0055114 GO:0003960	2-alkenal_reductase_(NAD(P)(+));NADPH:quinone_reductase	C
evm.model.scaffold112_size645884.146	185	1	Protein DMP2	GO:0009838 GO:0016021 GO:0010256	NULL	S
evm.model.scaffold112_size645884.92	502	4	Lysophospholipid acyltransferase 1	GO:0071617 GO:0047184 GO:0019375 GO:0051087 GO:0019432 GO:0008654 GO:0016021 GO:0005886	1-acylglycerophosphocholine_O-acyltransferase	S
evm.model.scaffold112_size645884.134	129	1	Uncharacterized protein (Fragment)	GO:0006807 GO:0043170 GO:0044238	NULL	E
evm.model.scaffold112_size645884.73	98	1	Maturase K (Fragment)	GO:0003824 GO:0006259	NULL	E
evm.model.scaffold112_size645884.70	96	1	hypothetical protein	noGO	NULL	S
evm.model.scaffold112_size645884.4	481	4	Myosin-binding protein 7	GO:0016021 GO:0017022 GO:0030133	NULL	S
evm.model.scaffold112_size645884.94	338	1	Putative ovule protein	GO:0001841 GO:0031965 GO:0006606 GO:1990904 GO:0008536 GO:0005643 GO:0005654	NULL	U
evm.model.scaffold112_size645884.63	832	1	Pentatricopeptide repeat-containing protein	GO:0090305 GO:0003723 GO:0009451 GO:0004519 GO:0043231 GO:0005515	NULL	S
evm.model.scaffold112_size645884.102	462	4	3-hydroxy-3-methylglutaryl coenzyme A synthase	GO:0009506 GO:0019287 GO:0005829 GO:0004421 GO:0016126	Hydroxymethylglutaryl-CoA_synthase	I
evm.model.scaffold112_size645884.26	104	4	hypothetical protein	noGO	NULL	S
evm.model.scaffold112_size645884.145	163	1	Putative ovule protein	noGO	NULL	S
evm.model.scaffold112_size645884.55	204	1	RING-H2 finger protein ATL67-like	GO:0061630 GO:0043161 GO:0016567 GO:0016021 GO:0008168 GO:0032259	NULL	O
evm.model.scaffold112_size645884.14	178	1	hypothetical protein	noGO	NULL	S
evm.model.scaffold112_size645884.132	215	1	hypothetical protein	noGO	NULL	S
evm.model.scaffold112_size645884.47	485	1	Irk-interacting protein	GO:0016020	NULL	none
evm.model.scaffold112_size645884.50	273	Singleton	Putative ovule protein	GO:0009534 GO:0009706 GO:0016021	NULL	S
evm.model.scaffold112_size645884.131	104	1	hypothetical protein	noGO	NULL	S
evm.model.scaffold112_size645884.104	485	1	Irk-interacting protein	GO:0016020	NULL	none
evm.model.scaffold112_size645884.147	648	1	Phosphomethylpyrimidine synthase	GO:0009570 GO:0005524 GO:0019904 GO:0008270 GO:0080041 GO:0006508 GO:0016021 GO:0010266 GO:0051536 GO:0004222 GO:0016830 GO:0009228	Acting_on_peptide_bonds_(peptidases);ADP-sugar_diphosphatase	H
evm.model.scaffold1131_size16070.3	1021	1	kinesin-like protein KIN12A	GO:0008283 GO:0006890 GO:0008574 GO:0005873 GO:0007018 GO:0000278 GO:0008017 GO:0005524 GO:0003677 GO:0005813 GO:0005819 GO:0005829 GO:0019886	Adenosinetriphosphatase;Nucleoside-triphosphate_phosphatase;Plus-end-directed_kinesin_ATPase	Z
evm.model.scaffold1131_size16070.2	195	1	Mitochondrial inner membrane protease ATP23	GO:0033615 GO:0046872 GO:0034982 GO:0031314 GO:0004222	Acting_on_peptide_bonds_(peptidases)	L
evm.model.scaffold1132_size15961.2	139	1	RING-H2 finger protein ATL48-like	GO:0016021 GO:0016301 GO:0016310	NULL	S
evm.model.scaffold1132_size15961.3	384	1	Putative CW7	noGO	NULL	S
evm.model.scaffold1135_size15809.1	90	1	hypothetical protein	noGO	NULL	S
evm.model.scaffold1136_size15778.2	521	1	Allene oxide synthase	GO:0019825 GO:0009695 GO:0016705 GO:0009941 GO:0047987 GO:0009611 GO:0009753 GO:0009978 GO:0004497 GO:0009535 GO:0020037 GO:0019373 GO:0005506 GO:0031408 GO:0055114 GO:0050832 GO:0016125	Hydroperoxide_dehydratase	Q
evm.model.scaffold1136_size15778.3	264	1	Pre-mRNA-splicing factor ATP-dependent RNA helicase	noGO	NULL	S
evm.model.scaffold1136_size15778.1	543	1	protein WEAK CHLOROPLAST MOVEMENT UNDER BLUE LIGHT 1-like isoform X2	GO:0005829 GO:0009903 GO:0009904	NULL	S
evm.model.scaffold1137_size15769.1	268	1	Homeodomain-like protein	GO:0003700 GO:0010082 GO:0010119 GO:0010150 GO:0080113 GO:0006355 GO:0009873 GO:0009736 GO:0000156 GO:0003677	NULL	K
evm.model.scaffold1138_size15732.3	813	1	ribonucleases P/MRP protein subunit POP1 isoform X1	GO:0090502 GO:0004526 GO:0000172 GO:0000171 GO:0016078 GO:0001682 GO:0005655 GO:0005654	Acting_on_ester_bonds;Acting_on_ester_bonds;Ribonuclease_P	A
evm.model.scaffold1139_size15707.2	379	1	transcription repressor OFP6-like	GO:0045892 GO:0005737 GO:1900457	NULL	S
evm.model.scaffold1139_size15707.1	1277	1	Tetratricopeptide-like helical	GO:0000407 GO:0031410 GO:1990072 GO:0005515 GO:0006888 GO:0030242 GO:0032258 GO:0034497	NULL	D
evm.model.scaffold113_size644116.59	447	1	Glycosyl hydrolase, five-bladed beta-propellor domain-containing protein	GO:0003824	NULL	B
evm.model.scaffold113_size644116.143	110	1	Putative mediator of RNA polymerase II transcription subunit 15-like	GO:0016021 GO:0016874	NULL	none
evm.model.scaffold113_size644116.125	386	1	Xyloglucan endotransglucosylase/hydrolase	GO:0005618 GO:0016021 GO:0071555 GO:0030246 GO:0004553 GO:0016762 GO:0010411 GO:0042546	Xyloglucan:xyloglucosyl_transferase	G
evm.model.scaffold113_size644116.103	203	1	21 kDa protein-like	GO:0004857	NULL	S
evm.model.scaffold113_size644116.49	157	1	Putative LisH domain-containing protein C1711.05-like protein	noGO	NULL	none
evm.model.scaffold113_size644116.10	629	1	probable methyltransferase PMT18	GO:0005802 GO:0016021 GO:0008757 GO:0032259	NULL	S
evm.model.scaffold113_size644116.83	119	1	hypothetical protein	noGO	NULL	S
evm.model.scaffold113_size644116.121	938	1	Receptor protein kinase TMK1	GO:0005524 GO:0005515 GO:0007165 GO:0016021 GO:0006468 GO:0005886 GO:0004675	Transferring_phosphorus-containing_groups	T
evm.model.scaffold113_size644116.77	341	3	WUSCHEL-related homeobox 1	GO:0051301 GO:0048353 GO:0051510 GO:0003700 GO:0048482 GO:0005829 GO:0006355 GO:0048446 GO:0009965 GO:0003677	NULL	K
evm.model.scaffold113_size644116.116	104	1	Uncharacterized protein	noGO	NULL	L
evm.model.scaffold113_size644116.119	295	1	cysteine-rich repeat secretory protein 12-like	GO:0009506 GO:0042742 GO:0016020	NULL	S
evm.model.scaffold113_size644116.9	193	2	Lipoyl synthase	GO:0016021	NULL	S
evm.model.scaffold113_size644116.97	211	1	hypothetical protein	noGO	NULL	S
evm.model.scaffold113_size644116.58	851	1	Anaphase-promoting complex subunit 2	GO:0031625 GO:0005680 GO:0005819 GO:0006511	NULL	DO
evm.model.scaffold113_size644116.135	112	1	hypothetical protein	noGO	NULL	S
evm.model.scaffold113_size644116.134	74	1	hypothetical protein	noGO	NULL	S
evm.model.scaffold113_size644116.131	118	1	hypothetical protein	noGO	NULL	S
evm.model.scaffold113_size644116.55	222	1	Uncharacterized protein	GO:0016021 GO:0010256	NULL	S
evm.model.scaffold113_size644116.126	695	1	Uncharacterized protein	noGO	NULL	S
evm.model.scaffold113_size644116.102	139	1	hypothetical protein	noGO	NULL	S
evm.model.scaffold113_size644116.118	124	1	hypothetical protein	noGO	NULL	S
evm.model.scaffold113_size644116.23	503	1	Uncharacterized protein	noGO	NULL	S
evm.model.scaffold113_size644116.141	261	1	Chloroplast, nucleus, chloroplast envelope, putative	noGO	NULL	S
evm.model.scaffold113_size644116.24	67	2	hypothetical protein	noGO	NULL	S
evm.model.scaffold113_size644116.48	597	1	Sucrose transporter	GO:0003723 GO:0015770 GO:0009611 GO:0016021 GO:0008515 GO:0034219 GO:0090406	NULL	G
evm.model.scaffold113_size644116.146	1622	1	Abc transporter c family member 2	GO:0042626 GO:0008490 GO:0019829 GO:1901684 GO:0008559 GO:0005774 GO:1902417 GO:0043225 GO:0098660 GO:1902418 GO:0005524 GO:0006855 GO:0009506 GO:0043492 GO:0046685 GO:0098655 GO:0016021 GO:0042908 GO:0015405 GO:0015700 GO:0015446	Arsenite-transporting_ATPase;Adenosinetriphosphatase;ABC-type_xenobiotic_transporter;Nucleoside-triphosphate_phosphatase	Q
evm.model.scaffold113_size644116.57	533	1	N-terminal acetyltransferase A, auxiliary subunit	GO:0005515 GO:0018024 GO:0034968	Histone-lysine_N-methyltransferase	B
evm.model.scaffold113_size644116.84	167	1	hypothetical protein	noGO	NULL	S
evm.model.scaffold113_size644116.8	283	3	Survival motor neuron	GO:0005576 GO:0005179	NULL	S
evm.model.scaffold113_size644116.68	221	1	Uncharacterized protein	noGO	NULL	L
evm.model.scaffold113_size644116.129	125	1	OSJNBb0013O03.9 protein	noGO	NULL	L
evm.model.scaffold113_size644116.46	396	1	protein kinase 2B, chloroplastic-like	GO:0005524 GO:0006468 GO:0004674	Transferring_phosphorus-containing_groups	T
evm.model.scaffold113_size644116.60	505	3	probable folate-biopterin transporter 6	GO:0005737 GO:0016021 GO:0003723 GO:0016627 GO:0006221 GO:0006396 GO:0045747 GO:0055114	NULL	S
evm.model.scaffold113_size644116.147	600	1	Cationic amino acid transporter 1	GO:0015189 GO:0051938 GO:0016021 GO:1903401 GO:0015813 GO:0005886 GO:0005313	NULL	E
evm.model.scaffold113_size644116.47	223	1	Aldo/keto reductase	GO:0016021	NULL	S
evm.model.scaffold113_size644116.75	265	3	WUSCHEL-related homeobox 1	GO:0051301 GO:0048353 GO:0051510 GO:0003700 GO:0048482 GO:0005829 GO:0006355 GO:0048446 GO:0009965 GO:0003677	NULL	K
evm.model.scaffold113_size644116.50	338	1	Putative CAAX aminoterminal protease	GO:0006508 GO:0016021 GO:0008233	NULL	S
evm.model.scaffold113_size644116.117	166	1	hypothetical protein	noGO	NULL	S
evm.model.scaffold113_size644116.94	797	1	Myosin-binding protein 1	GO:0017022	NULL	S
evm.model.scaffold113_size644116.15	128	2	hypothetical protein	noGO	NULL	S
evm.model.scaffold113_size644116.93	481	1	Uncharacterized protein	noGO	NULL	L
evm.model.scaffold113_size644116.5	278	2	Lipoyl synthase	GO:0016021	NULL	S
evm.model.scaffold113_size644116.140	362	1	protein-lysine N-methyltransferase EEF2KMT isoform X1	GO:0005829 GO:0016740	NULL	S
evm.model.scaffold113_size644116.95	483	1	Long chain base biosynthesis protein 1	GO:0030170 GO:0009793 GO:0008483 GO:1904504 GO:0046512 GO:0043067 GO:0046513 GO:0046511 GO:0006686 GO:0009825 GO:0004758 GO:0016021 GO:0035339 GO:0098827	Serine_C-palmitoyltransferase	O
evm.model.scaffold113_size644116.7	283	3	Survival motor neuron	GO:0005576 GO:0005179	NULL	S
evm.model.scaffold113_size644116.67	444	1	Uncharacterized protein	noGO	NULL	S
evm.model.scaffold1140_size15692.1	949	1	Lon protease homolog, mitochondrial	GO:0070407 GO:0004252 GO:0043565 GO:0004176 GO:0007005 GO:0003697 GO:0005524 GO:0009507 GO:0006515 GO:0005759 GO:0051131 GO:0005829 GO:0034599	Acting_on_peptide_bonds_(peptidases);Adenosinetriphosphatase;Nucleoside-triphosphate_phosphatase	O
evm.model.scaffold1140_size15692.2	751	1	Exocyst complex component like	GO:0060321 GO:0009506 GO:0070062 GO:0048278 GO:0006893 GO:0005829 GO:0006887 GO:0005886 GO:0000145	NULL	U
evm.model.scaffold1141_size15467.3	251	1	psbP domain-containing protein 6, chloroplastic	GO:0009570 GO:0031977 GO:0016491 GO:0005509 GO:0009534 GO:0009654 GO:0015979 GO:0055114 GO:0019898	NULL	S
evm.model.scaffold1142_size15455.5	406	4	xylulose 5-phosphate/phosphate translocator, chloroplastic	GO:0071917 GO:0015297 GO:0015120 GO:0009941 GO:0016021 GO:0051726 GO:0004693 GO:0015713 GO:0035436	Transferring_phosphorus-containing_groups;Cyclin-dependent_kinase	EG
evm.model.scaffold1142_size15455.2	224	4	Chaperone DnaJ-domain superfamily protein	GO:0009507	NULL	O
evm.model.scaffold1142_size15455.6	319	4	Pectate lyase	GO:0016021 GO:0030570 GO:0046872 GO:0045490	Pectate_lyase	G
evm.model.scaffold1142_size15455.4	363	4	Putative F17A17.37 protein-like	GO:0005618 GO:0005886	NULL	S
evm.model.scaffold1143_size15444.1	458	1	Major facilitator superfamily	GO:0016021 GO:0055085	NULL	S
evm.model.scaffold1143_size15444.4	940	1	WD repeat-containing protein 3	GO:0032040 GO:0031965 GO:0005515 GO:0030515 GO:0030490 GO:0016905 GO:0008168 GO:0034388 GO:0006468 GO:0005654 GO:0032259	Transferring_phosphorus-containing_groups;Calcium/calmodulin-dependent_protein_kinase;[Myosin_heavy-chain]_kinase	A
evm.model.scaffold1143_size15444.5	235	1	Putative thaumatin	noGO	NULL	O
evm.model.scaffold1144_size15427.2	284	1	protein PGR	GO:0016021	NULL	S
evm.model.scaffold1144_size15427.1	96	1	Os08g0512900 protein	GO:0016021	NULL	none
evm.model.scaffold1144_size15427.4	839	1	Pentatricopeptide repeat-containing protein	GO:0005515 GO:0005737 GO:0009451 GO:0043231	NULL	S
evm.model.scaffold1144_size15427.3	162	1	protein SPA, chloroplastic	GO:0009570 GO:0003756 GO:0016021 GO:0010206 GO:0009535	Protein_disulfide-isomerase	S
evm.model.scaffold1145_size15395.1	960	1	Plasma membrane ATPase	GO:0005524 GO:0042626 GO:0051453 GO:0043492 GO:0120029 GO:0022853 GO:0016021 GO:0008553 GO:0015405 GO:0005774 GO:0005886	Adenosinetriphosphatase;P-type_H(+)-exporting_transporter;Nucleoside-triphosphate_phosphatase	P
evm.model.scaffold1145_size15395.2	119	1	Serine/arginine repetitive matrix protein	noGO	NULL	none
evm.model.scaffold1146_size15362.2	322	1	Protein rolling stone like	GO:0016020	NULL	none
evm.model.scaffold1146_size15362.1	163	1	Transmembrane protein 18	GO:0016021 GO:0009846 GO:0009860 GO:0052543	NULL	S
evm.model.scaffold1147_size15341.4	317	1	Protein fatty acid export 3, chloroplastic	GO:0009706	NULL	S
evm.model.scaffold1147_size15341.2	875	3	Receptor-like protein kinase feronia	GO:0018108 GO:0010483 GO:0009791 GO:0046777 GO:0009741 GO:0004674 GO:0005886 GO:0009723 GO:0009788 GO:0005524 GO:0009506 GO:0043680 GO:0004715 GO:0030308 GO:0016021 GO:0010118 GO:0050832	Transferring_phosphorus-containing_groups;Transferring_phosphorus-containing_groups;Non-specific_protein-tyrosine_kinase	T
evm.model.scaffold1147_size15341.3	875	3	Receptor-like protein kinase feronia	GO:0018108 GO:0010483 GO:0009791 GO:0046777 GO:0009741 GO:0004674 GO:0005886 GO:0009723 GO:0009788 GO:0005524 GO:0009506 GO:0043680 GO:0004715 GO:0030308 GO:0016021 GO:0010118 GO:0050832	Transferring_phosphorus-containing_groups;Transferring_phosphorus-containing_groups;Non-specific_protein-tyrosine_kinase	T
evm.model.scaffold1147_size15341.5	111	1	Protein Wnt-3a like	noGO	NULL	none
evm.model.scaffold1147_size15341.6	118	1	Non-specific lipid-transfer protein	GO:0006869 GO:0016020 GO:0008289	NULL	G
evm.model.scaffold1148_size15320.1	262	1	Putative calcium-dependent protein kinase-like	GO:0000139 GO:0016021 GO:0016757 GO:0071555	NULL	S
evm.model.scaffold1149_size15309.3	488	1	plant intracellular Ras-group-related LRR protein 9-like	GO:0030029 GO:0005912 GO:0045199 GO:0007043 GO:0007165 GO:0005737 GO:0015031 GO:0048557 GO:0045108 GO:0016323 GO:0005515	NULL	S
evm.model.scaffold114_size641222.68	485	1	Pentatricopeptide repeat-containing protein, chloroplastic	GO:0005515	NULL	S
evm.model.scaffold114_size641222.169	513	1	Citrate synthase	GO:0006635 GO:0004108 GO:0009506 GO:1990886 GO:0004395 GO:0006099 GO:0031314 GO:0006744 GO:0008689 GO:0009514 GO:0008425 GO:0032259	Citrate_(Si)-synthase;3-demethylubiquinol_3-O-methyltransferase;Polyprenyldihydroxybenzoate_methyltransferase	H
evm.model.scaffold114_size641222.61	337	4	protein HGH1 homolog	GO:0005664 GO:0003677 GO:0006260	NULL	S
evm.model.scaffold114_size641222.53	735	4	Nucleolar complex protein	GO:0030691 GO:0042273 GO:0030690 GO:0005829 GO:0005730 GO:0005654 GO:0016020	NULL	J
evm.model.scaffold114_size641222.7	459	1	Protein O-GlcNAc transferase	GO:0016020 GO:0016757	NULL	S
evm.model.scaffold114_size641222.64	219	4	binding partner of ACD11 1-like isoform X1	GO:0003676	NULL	A
evm.model.scaffold114_size641222.72	92	1	hypothetical protein	noGO	NULL	S
evm.model.scaffold114_size641222.12	431	1	GDP-L-galactose phosphorylase	GO:0010471 GO:0010473 GO:0010472 GO:0010193 GO:0080046 GO:0009753 GO:0080047 GO:0080048 GO:0006006 GO:0042742 GO:0052544 GO:0009408 GO:0005737 GO:0008928 GO:0010475 GO:0010474 GO:0019853 GO:0016787	Glycogen_phosphorylase;GDP-D-glucose_phosphorylase;Mannose-1-phosphate_guanylyltransferase_(GDP);GDP-L-galactose_phosphorylase	S
evm.model.scaffold114_size641222.170	462	1	Protein too many mouths	GO:1905034 GO:0071215 GO:0016021 GO:0008356 GO:0042277 GO:0010376 GO:0010375 GO:0033612 GO:0031225	NULL	S
evm.model.scaffold114_size641222.24	431	1	Heterogeneous nuclear ribonucleoprotein 1-like	GO:0005844 GO:0005737 GO:0008266 GO:0048864	NULL	A
evm.model.scaffold114_size641222.148	159	4	Ribosomal protein	GO:0005840 GO:0003735 GO:0006412	NULL	J
evm.model.scaffold114_size641222.59	268	4	sphinganine C4-monooxygenase 1-like	GO:0005789 GO:0000254 GO:0005506 GO:0046520 GO:0042284 GO:0000170 GO:0016021 GO:0055114 GO:0098827	Acting_on_paired_donors,_with_incorporation_or_reduction_of_molecular_oxygen._The_oxygen_incorporated_need_not_be_derived_from_O(2);Acting_on_paired_donors,_with_incorporation_or_reduction_of_molecular_oxygen._The_oxygen_incorporated_need_not_be_derived_from_O(2)	I
evm.model.scaffold114_size641222.67	768	1	Potassium transporter	GO:0015079 GO:0071805 GO:0016021 GO:0005886	NULL	P
evm.model.scaffold114_size641222.2	842	1	Bromodomain and PHD finger-containing protein	GO:0070577	NULL	S
evm.model.scaffold114_size641222.46	282	3	Basic helix-loop-helix transcription factor	GO:0015995 GO:0010187 GO:0042802 GO:0010161 GO:0006783 GO:0006355 GO:0046983 GO:0009740 GO:0009959 GO:0003677 GO:0003700 GO:0010313 GO:0010100	NULL	K
evm.model.scaffold114_size641222.19	347	1	Glucan endo-1,3-beta-D-glucosidase	GO:0005975 GO:0042973	Beta-glucosidase;Glucan_endo-1,3-beta-D-glucosidase	G
evm.model.scaffold114_size641222.42	629	4	RAP domain-containing protein, chloroplastic	GO:0042646 GO:0009507 GO:0003723 GO:1901259	NULL	S
evm.model.scaffold114_size641222.51	390	4	Enoyl-ACP Reductase	GO:0009570 GO:0005835 GO:0005507 GO:0004318 GO:0009941 GO:0055114 GO:0006633 GO:0016631 GO:0009579	Fatty-acid_synthase;Enoyl-[acyl-carrier-protein]_reductase_(NADH)	Q
evm.model.scaffold114_size641222.34	244	1	Uncharacterized protein	noGO	NULL	S
evm.model.scaffold114_size641222.50	121	4	CDT1-like protein a, chloroplastic isoform X1	noGO	NULL	L
evm.model.scaffold114_size641222.47	375	3	Transcription factor PIF1	GO:0015995 GO:0010187 GO:0042802 GO:0010161 GO:0006783 GO:0006355 GO:0009740 GO:0009959 GO:0003677 GO:0003700 GO:0010313 GO:0010100 GO:0046983	NULL	K
evm.model.scaffold114_size641222.75	618	1	hypothetical protein	noGO	NULL	S
evm.model.scaffold114_size641222.87	946	1	lysine-specific demethylase JMJ25-like	GO:0031490 GO:0032454 GO:0000976 GO:0033169 GO:0006355 GO:0000785 GO:0005654	NULL	K
evm.model.scaffold114_size641222.58	120	4	60S ribosomal protein L34	GO:0005840 GO:0003735 GO:0006412	NULL	J
evm.model.scaffold114_size641222.178	580	1	Sister chromatid cohesion 1 protein 3-like	GO:0007062 GO:0005515 GO:0009555 GO:0000798 GO:0003682 GO:0005730 GO:0000278 GO:0006302	NULL	D
evm.model.scaffold114_size641222.177	1043	1	Elongation factor Ts, mitochondrial	GO:0005515 GO:0003746 GO:0005759 GO:0044434 GO:0070125	NULL	J
evm.model.scaffold114_size641222.62	1017	4	Ultraviolet-B receptor like	GO:0046872	NULL	T
evm.model.scaffold114_size641222.38	498	1	Aldehyde dehydrogenase family 2 member C4	GO:0004029 GO:0009699 GO:0055114 GO:0050269	Coniferyl-aldehyde_dehydrogenase;Aldehyde_dehydrogenase_(NAD(P)(+));Aldehyde_dehydrogenase_(NAD(+))	C
evm.model.scaffold114_size641222.152	302	4	pentatricopeptide repeat-containing protein At4g18975, chloroplastic-like isoform X1	GO:0090305 GO:0003723 GO:0009451 GO:0004519 GO:0043231 GO:0005515	NULL	S
evm.model.scaffold114_size641222.63	399	1	serine/threonine-protein phosphatase 7 long form homolog	noGO	NULL	S
evm.model.scaffold114_size641222.150	140	4	Essential protein Yae1, N-terminal	GO:0004672 GO:0005524 GO:0006468	NULL	S
evm.model.scaffold114_size641222.8	178	1	hypothetical protein	noGO	NULL	S
evm.model.scaffold114_size641222.65	739	4	Putative receptor-like protein kinase	GO:0005524 GO:0006468 GO:0004674	Transferring_phosphorus-containing_groups	T
evm.model.scaffold114_size641222.52	299	4	zinc finger CCCH domain-containing protein 14-like	GO:0003723 GO:0046872	NULL	S
evm.model.scaffold114_size641222.43	143	2	CDT1-like protein a, chloroplastic isoform X1	noGO	NULL	L
evm.model.scaffold114_size641222.76	244	1	Uncharacterized protein	noGO	NULL	S
evm.model.scaffold114_size641222.71	271	1	hypothetical protein	noGO	NULL	S
evm.model.scaffold114_size641222.129	68	1	hypothetical protein	noGO	NULL	S
evm.model.scaffold114_size641222.37	122	1	hypothetical protein	noGO	NULL	S
evm.model.scaffold114_size641222.128	363	4	OSIGBa0136B09.4 protein	GO:0003887 GO:0003964 GO:0003723 GO:0090501 GO:0032197 GO:0006508 GO:0000943 GO:0006278 GO:0004540 GO:0008233	RNA-directed_DNA_polymerase;DNA-directed_DNA_polymerase	E
evm.model.scaffold114_size641222.66	1218	1	Phospholipid-transporting ATPase	GO:0000287 GO:0005524 GO:0005802 GO:0005548 GO:0140326 GO:0045332 GO:0048367 GO:0043492 GO:0016021 GO:0048194 GO:0005886	Adenosinetriphosphatase;P-type_phospholipid_transporter;Nucleoside-triphosphate_phosphatase	P
evm.model.scaffold114_size641222.171	469	Singleton	ATP-dependent DNA helicase	GO:0000166 GO:0006281 GO:0003678 GO:0000723	Adenosinetriphosphatase;DNA_helicase;Nucleoside-triphosphate_phosphatase	L
evm.model.scaffold114_size641222.23	380	Singleton	C2 domain containing protein	noGO	NULL	S
evm.model.scaffold1150_size15268.2	91	4	LYR motif-containing protein	noGO	NULL	S
evm.model.scaffold1151_size15230.1	145	1	actin-depolymerizing factor	GO:0015629 GO:0003779 GO:0030042	NULL	Z
evm.model.scaffold1151_size15230.2	108	1	ethylene-responsive transcription factor ERF096-like	GO:0003700 GO:0010186 GO:0045893 GO:0090332 GO:0009873 GO:0043565 GO:0010200 GO:0009789	NULL	K
evm.model.scaffold1152_size15161.2	283	3	prohibitin-1, mitochondrial-like	GO:0005747 GO:0009507 GO:0009506 GO:0005618 GO:0005774 GO:0016021	NULL	O
evm.model.scaffold1152_size15161.1	539	1	Lycopene epsilon cyclase	GO:0016705 GO:0016021 GO:0045435 GO:0055114 GO:0016123	NULL	I
evm.model.scaffold1153_size15141.1	428	1	E3 ubiquitin-protein ligase Hakai	GO:0003676 GO:0061630 GO:0005737 GO:0045807 GO:0007162 GO:0036396 GO:0016567 GO:0030335 GO:0080009	NULL	O
evm.model.scaffold1154_size15058.1	233	3	Uncharacterized protein (Fragment)	noGO	NULL	K
evm.model.scaffold1154_size15058.2	234	3	B3 domain-containing protein At5g24050 family	noGO	NULL	K
evm.model.scaffold1154_size15058.3	224	3	Uncharacterized protein (Fragment)	noGO	NULL	K
evm.model.scaffold1155_size15020.3	438	1	E3 ubiquitin-protein ligase mbr1	noGO	NULL	O
evm.model.scaffold1155_size15020.2	600	1	Xaa-Pro dipeptidyl-peptidase	noGO	NULL	S
evm.model.scaffold1155_size15020.1	261	1	multiple organellar RNA editing factor 8, chloroplastic/mitochondrial-like	GO:0009507 GO:0080156 GO:0016554 GO:0050897	NULL	S
evm.model.scaffold1156_size14945.4	386	4	Putative transcription factor PosF21	GO:0003700 GO:0006355	NULL	K
evm.model.scaffold1156_size14945.2	115	4	DNA polymerase delta subunit 4	GO:0043625 GO:0003887 GO:0006261 GO:0000731	DNA-directed_DNA_polymerase	S
evm.model.scaffold1156_size14945.3	841	4	flowering time control protein FPA-like isoform X1	GO:0003723 GO:0010228 GO:0009553 GO:0009911 GO:0000785 GO:0031048 GO:0006378 GO:0000398	NULL	A
evm.model.scaffold1156_size14945.5	613	4	electron transfer flavoprotein-ubiquinone oxidoreductase, mitochondrial isoform X1	GO:0031305 GO:0022904 GO:0006552 GO:0043783 GO:0017133 GO:0004174 GO:0051539 GO:0048039 GO:0009646	Oxidizing_metal_ions;Electron-transferring-flavoprotein_dehydrogenase	C
evm.model.scaffold1157_size14928.1	208	1	Heat shock protein Hsp90 family protein	GO:0009507 GO:0016021	NULL	none
evm.model.scaffold1157_size14928.2	103	1	Os01g0235100 protein	GO:0009507	NULL	S
evm.model.scaffold1158_size14884.2	188	1	LIM domain-containing protein WLIM1-like	GO:0051015 GO:0003729 GO:0005886 GO:0051017 GO:0046872	NULL	TZ
evm.model.scaffold1158_size14884.5	206	1	Apoptotic ATPase	noGO	NULL	T
evm.model.scaffold1158_size14884.3	427	1	F-box protein	GO:0005515	NULL	S
evm.model.scaffold1158_size14884.4	516	1	putative disease resistance RPP13-like protein 1	noGO	NULL	T
evm.model.scaffold1159_size14876.3	556	3	WSC domain-containing protein ARB_07867-like	GO:0045480 GO:0055114	Galactose_oxidase	S
evm.model.scaffold1159_size14876.1	349	1	Ribosome recycling factor	GO:0005840 GO:0003735 GO:0043023 GO:0006412	NULL	J
evm.model.scaffold1159_size14876.4	454	3	Aldehyde oxidase glox1	GO:0045480 GO:0055114	Galactose_oxidase	S
evm.model.scaffold1159_size14876.2	506	1	Ferruginol synthase-like	GO:0016705 GO:0005506 GO:0016020 GO:0044550 GO:0055114 GO:0009733 GO:0020037	NULL	Q
evm.model.scaffold115_size639320.154	187	1	transcriptional regulator SUPERMAN-like	GO:0003676	NULL	S
evm.model.scaffold115_size639320.174	113	1	MLP-like protein 34-like	GO:0006952	NULL	S
evm.model.scaffold115_size639320.33	128	1	Uncharacterized protein (Fragment)	noGO	NULL	L
evm.model.scaffold115_size639320.161	91	1	hypothetical protein	noGO	NULL	S
evm.model.scaffold115_size639320.173	572	1	protein NRT1/ PTR FAMILY 8.1-like	GO:0035672 GO:0015333 GO:0009506 GO:0042937 GO:0006807 GO:0042938 GO:0042939 GO:1902600 GO:0016021 GO:0005886	NULL	E
evm.model.scaffold115_size639320.185	892	4	Histone-lysine N-methyltransferase ATX1, putative isoform 2	GO:0005515	NULL	none
evm.model.scaffold115_size639320.191	553	4	protein GDAP2 homolog	noGO	NULL	BK
evm.model.scaffold115_size639320.190	248	4	putative SNAP25 homologous protein SNAP30	GO:0061025 GO:0016192 GO:0005484 GO:0005886	NULL	U
evm.model.scaffold115_size639320.1	561	1	MAG2-interacting protein 2-like isoform X1	GO:0006624 GO:0005515 GO:0048193	NULL	S
evm.model.scaffold115_size639320.16	137	1	Uncharacterized protein	noGO	NULL	L
evm.model.scaffold115_size639320.4	356	1	acyl-CoA-binding domain-containing protein 1-like	GO:0010162 GO:0032791 GO:0005886 GO:0009514 GO:0005789 GO:0005778 GO:0009409 GO:0006869 GO:0001666 GO:0009737 GO:0003779 GO:0000062 GO:0006629 GO:0016021 GO:0070300 GO:0010029 GO:0010288 GO:0098827	NULL	I
evm.model.scaffold115_size639320.97	160	Singleton	Putative acyl-coenzyme A thioesterase 13-like	GO:0047617	Acyl-CoA_hydrolase	Q
evm.model.scaffold115_size639320.189	252	4	zinc finger protein ZAT4-like	GO:0003700 GO:0006355 GO:0003676	NULL	S
evm.model.scaffold115_size639320.35	298	1	hypothetical protein	noGO	NULL	S
evm.model.scaffold115_size639320.182	457	1	Piriformospora indica-insensitive protein 2	GO:0016020 GO:0005515 GO:0016491 GO:0008152	NULL	S
evm.model.scaffold115_size639320.198	335	4	MYB transcription factor MIXTA-like 9 protein (Fragment)	GO:0003677	NULL	K
evm.model.scaffold115_size639320.194	355	4	Putative son of sevenless-like	GO:0016021	NULL	none
evm.model.scaffold115_size639320.96	351	1	Gibberellin 20-oxidase	GO:0009826 GO:0005737 GO:0048366 GO:0048575 GO:0045544 GO:0016829 GO:0009686 GO:0055114 GO:0009740	Acting_on_paired_donors,_with_incorporation_or_reduction_of_molecular_oxygen._The_oxygen_incorporated_need_not_be_derived_from_O(2)	Q
evm.model.scaffold115_size639320.94	136	1	hypothetical protein	noGO	NULL	S
evm.model.scaffold115_size639320.101	78	Singleton	UvrABC system protein A	GO:0046872	NULL	none
evm.model.scaffold115_size639320.195	1450	4	ARF guanine-nucleotide exchange factor GNOM	GO:0042803 GO:0010274 GO:1902410 GO:0005086 GO:0007155 GO:0048765 GO:0006886 GO:0006897 GO:0005886 GO:0065009 GO:0048209 GO:0009942 GO:0009826 GO:0005802 GO:0001736 GO:0032509 GO:0016021 GO:0005829 GO:0010008 GO:0032012 GO:0071555 GO:0010540 GO:0010311	NULL	U
evm.model.scaffold115_size639320.32	140	3	hypothetical protein	noGO	NULL	S
evm.model.scaffold115_size639320.197	207	4	Transmembrane emp24 domain-containing protein p24delta9-like	GO:0019905 GO:0006890 GO:1902003 GO:0007030 GO:0030140 GO:0005793 GO:0006886 GO:0042589 GO:0044877 GO:0005789 GO:0006888 GO:0005801 GO:0045055 GO:0016021 GO:0070765 GO:0030134 GO:0051259 GO:0030137 GO:0035964	NULL	U
evm.model.scaffold115_size639320.17	196	1	hypothetical protein	noGO	NULL	S
evm.model.scaffold115_size639320.156	170	1	Uncharacterized protein	noGO	NULL	L
evm.model.scaffold115_size639320.193	562	4	S-acyltransferase	GO:0016020 GO:0016746	NULL	L
evm.model.scaffold115_size639320.31	217	3	hypothetical protein	noGO	NULL	S
evm.model.scaffold115_size639320.38	180	1	hypothetical protein	noGO	NULL	S
evm.model.scaffold115_size639320.196	434	4	serine/threonine-protein kinase STY46-like	GO:0018108 GO:0005524 GO:0005515 GO:0004712 GO:0004715 GO:0005737 GO:0009742 GO:0010305 GO:0004674 GO:0035556 GO:0009734 GO:0030435	Transferring_phosphorus-containing_groups;Transferring_phosphorus-containing_groups;Dual-specificity_kinase;Non-specific_protein-tyrosine_kinase	T
evm.model.scaffold115_size639320.86	154	1	hypothetical protein	noGO	NULL	S
evm.model.scaffold115_size639320.2	110	1	Protein yippee-like	GO:0046872	NULL	S
evm.model.scaffold115_size639320.158	652	1	Nucleolar protein 14	GO:0005730 GO:0030692 GO:0032040	NULL	J
evm.model.scaffold115_size639320.162	122	1	hypothetical protein	noGO	NULL	S
evm.model.scaffold115_size639320.3	516	1	Putative 3-5 exonuclease	GO:0003676 GO:0090305 GO:0008408	NULL	L
evm.model.scaffold115_size639320.184	253	1	Putative GMP synthase [glutamine-hydrolyzing] (Fragment)	GO:0008725 GO:0006284 GO:0006541 GO:0016740	DNA-3-methyladenine_glycosylase_II;DNA-3-methyladenine_glycosylase_I	L
evm.model.scaffold115_size639320.163	238	1	Uncharacterized protein	noGO	NULL	S
evm.model.scaffold115_size639320.5	705	1	Luminal-binding protein 5	GO:0046686 GO:0005730 GO:0005774 GO:0009735 GO:0005886 GO:0009507 GO:0009506 GO:0016592 GO:0005618 GO:0005829 GO:0030433 GO:0005788 GO:0016021 GO:0005524 GO:0032440 GO:0055114	2-alkenal_reductase_(NAD(P)(+))	O
evm.model.scaffold115_size639320.106	187	1	DNA/RNA polymerase superfamily protein	GO:0003824 GO:0005488 GO:0006259	NULL	L
evm.model.scaffold1160_size14867.4	474	4	aspartyl protease family protein At5g10770-like	GO:0004190 GO:0006508	Acting_on_peptide_bonds_(peptidases)	O
evm.model.scaffold1160_size14867.8	109	4	Nadh dehydrogenase [ubiquinone] iron-sulfur protein 6, mitochondrial	GO:0009150 GO:0005747 GO:0004129 GO:0009167 GO:0006120 GO:1902600 GO:0017144 GO:0009205	Cytochrome-c_oxidase	C
evm.model.scaffold1160_size14867.7	806	4	WEB family protein At3g02930, chloroplastic-like	GO:0007131 GO:0005875 GO:0000795	NULL	S
evm.model.scaffold1161_size14844.1	758	1	Formin-like protein	GO:0016021	NULL	TZ
evm.model.scaffold1162_size14770.3	603	1	inactive LRR receptor-like serine/threonine-protein kinase BIR2	GO:0005524 GO:0009507 GO:1900150 GO:0016021 GO:0046777 GO:1900425 GO:0004674 GO:0005886	Transferring_phosphorus-containing_groups	T
evm.model.scaffold1162_size14770.4	690	1	paired amphipathic helix protein Sin3-like 2 isoform X1	GO:0003714 GO:0005506 GO:0016705 GO:0031418 GO:0006355 GO:0055114 GO:1903507	NULL	B
evm.model.scaffold1162_size14770.1	452	1	Beta-glucuronosyltransferase glcat14b	GO:0009826 GO:0048681 GO:0008375 GO:0015020 GO:0070555 GO:0016021 GO:0000139 GO:0030166 GO:0098791	Glucuronosyltransferase	G
evm.model.scaffold1164_size14719.2	586	1	beta-fructofuranosidase, insoluble isoenzyme 1-like	GO:0005618 GO:0005975 GO:0016021 GO:0004564	Beta-fructofuranosidase	G
evm.model.scaffold1164_size14719.3	216	1	Soluble inorganic pyrophosphatase	GO:0000287 GO:0004427 GO:0005829 GO:0046686 GO:0006796	Inorganic_diphosphatase	C
evm.model.scaffold1164_size14719.1	317	1	Caffeoylshikimate esterase	GO:0016021 GO:0003846 GO:0016787	2-acylglycerol_O-acyltransferase	I
evm.model.scaffold1165_size14718.1	199	1	WUSCHEL-related homeobox 1	GO:0003700 GO:0099402 GO:0005829 GO:0006355 GO:0003677	NULL	K
evm.model.scaffold1166_size14656.2	324	1	Patatin	GO:0047372 GO:0016042 GO:0004620	Acylglycerol_lipase;Carboxylesterase	I
evm.model.scaffold1166_size14656.1	294	1	AT-hook motif nuclear-localized protein	GO:0016021 GO:0003680 GO:0003700 GO:0006355 GO:0010228	NULL	K
evm.model.scaffold1167_size14652.2	241	3	AP2/ERF transcription factor	GO:0003677 GO:0003700 GO:0009749 GO:1902074 GO:0006970 GO:0006355 GO:0050832 GO:0009788	NULL	K
evm.model.scaffold1167_size14652.1	241	3	Ethylene-responsive transcription factor	GO:0003677 GO:0003700 GO:0009749 GO:1902074 GO:0006970 GO:0006355 GO:0050832 GO:0009788	NULL	K
evm.model.scaffold1169_size14550.1	190	3	Protein RER1	GO:0005801 GO:0006890 GO:0016021	NULL	U
evm.model.scaffold1169_size14550.2	190	3	Protein RER1	GO:0005801 GO:0006890 GO:0016021	NULL	U
evm.model.scaffold116_size639307.114	139	1	hypothetical protein	noGO	NULL	S
evm.model.scaffold116_size639307.65	513	1	RNA-binding protein 34	GO:0005730 GO:0003676	NULL	A
evm.model.scaffold116_size639307.81	497	1	Serine/threonine protein phosphatase 2A regulatory subunit	GO:0000159 GO:0019888 GO:0007165 GO:0043666	NULL	T
evm.model.scaffold116_size639307.57	603	4	RuBisCO large subunit-binding protein subunit beta, chloroplastic	GO:0009570 GO:0019904 GO:0009941 GO:0051085 GO:0051082 GO:0042026 GO:0005730 GO:0005886 GO:0007005 GO:0009409 GO:0005524 GO:0008219 GO:0009627 GO:0044183 GO:0005829	NULL	O
evm.model.scaffold116_size639307.149	432	1	Transcription factor DIVARICATA	GO:0010252 GO:0009651 GO:0090697 GO:0010150 GO:0000976 GO:0009753 GO:0046686 GO:0009751 GO:0009723 GO:0009646 GO:0048527 GO:0009733 GO:0000122 GO:0009739 GO:0030307 GO:0003700 GO:0009737 GO:2000469	NULL	K
evm.model.scaffold116_size639307.54	1116	4	Karyopherin (Importin) beta 3	GO:0042307 GO:0008565 GO:0008536 GO:0005215 GO:0008139 GO:0006610 GO:0071230 GO:0031965 GO:0005737 GO:0000060 GO:0006607 GO:0016021 GO:0034399	NULL	UY
evm.model.scaffold116_size639307.154	516	1	GATA transcription factor 26-like	GO:0005667 GO:0008270 GO:0001085 GO:0000977 GO:0030154 GO:0001228 GO:0003682 GO:0045944	NULL	K
evm.model.scaffold116_size639307.151	157	1	Serine/threonine-protein phosphatase 7 long form-like	GO:0008270	NULL	S
evm.model.scaffold116_size639307.62	157	Singleton	Prefoldin subunit 4	GO:0016272 GO:0051087 GO:0005829 GO:0051082 GO:0006457	NULL	O
evm.model.scaffold116_size639307.12	185	4	hypothetical protein	noGO	NULL	S
evm.model.scaffold116_size639307.142	250	1	hypothetical protein	noGO	NULL	S
evm.model.scaffold116_size639307.110	604	1	hypothetical protein	noGO	NULL	S
evm.model.scaffold116_size639307.38	1138	1	Beta-xylosidase/alpha-L-arabinofuranosidase 2-like	GO:0045493 GO:0009627 GO:0009044 GO:0005618 GO:0031222 GO:0046556 GO:0016021 GO:0008422 GO:0102483	Beta-glucosidase;Non-reducing_end_alpha-L-arabinofuranosidase;Xylan_1,4-beta-xylosidase	G
evm.model.scaffold116_size639307.153	487	1	O-fucosyltransferase family protein	GO:0005802 GO:0016020 GO:0016757 GO:0006004	NULL	G
evm.model.scaffold116_size639307.41	423	3	Polygalacturonase	GO:0045490 GO:0005618 GO:0016020 GO:0009830 GO:0004650 GO:0010227 GO:0005576 GO:0009901 GO:0010047	Polygalacturonase	G
evm.model.scaffold116_size639307.115	127	1	hypothetical protein	noGO	NULL	S
evm.model.scaffold116_size639307.40	96	Singleton	Putative 40S ribosomal protein S23-1-like	GO:0005840 GO:0016021	NULL	none
evm.model.scaffold116_size639307.73	497	1	Carboxypeptidase	GO:0016021 GO:0004185 GO:0006508 GO:0019748	Acting_on_peptide_bonds_(peptidases);Acting_on_peptide_bonds_(peptidases)	O
evm.model.scaffold116_size639307.74	347	1	short-chain dehydrogenase TIC 32, chloroplastic-like	GO:0102339 GO:0102340 GO:0102341 GO:0102342 GO:0055114	Very-long-chain_3-oxoacyl-CoA_reductase	Q
evm.model.scaffold116_size639307.94	255	3	hypothetical protein	noGO	NULL	S
evm.model.scaffold116_size639307.146	461	1	RNA helicase	GO:0005524 GO:0003723 GO:0003724 GO:0070035 GO:0005737 GO:0008186 GO:0010501 GO:0005730	Adenosinetriphosphatase;RNA_helicase;Nucleoside-triphosphate_phosphatase	A
evm.model.scaffold116_size639307.64	720	1	Csc1-like protein rxw8	GO:0003824 GO:0016021	NULL	S
evm.model.scaffold116_size639307.68	778	1	Homeobox-leucine zipper protein ROC3	GO:0003700 GO:0048497 GO:0006355 GO:0008289 GO:0043565	NULL	K
evm.model.scaffold116_size639307.28	423	1	DUF21 domain-containing protein	GO:0005886 GO:0016021	NULL	S
evm.model.scaffold116_size639307.85	821	1	Uncharacterized protein	noGO	NULL	S
evm.model.scaffold116_size639307.61	343	1	protein WVD2-like 2	noGO	NULL	S
evm.model.scaffold116_size639307.76	232	1	dof zinc finger protein DOF4.6-like	GO:0003700 GO:0044212 GO:0006355 GO:0043565	NULL	K
evm.model.scaffold116_size639307.27	195	1	Pathogenesis-related protein 1	GO:0005576	NULL	S
evm.model.scaffold116_size639307.63	300	Singleton	ER membrane protein complex subunit 2-like	GO:0072546 GO:0005515 GO:0016740 GO:0034975	NULL	S
evm.model.scaffold116_size639307.60	1160	1	DExH-box ATP-dependent RNA helicase DExH3	GO:0008094 GO:0042826 GO:0008186 GO:0000978 GO:0002151 GO:0006396 GO:1902741 GO:0045944 GO:0009615 GO:0003697 GO:0001047 GO:0005524 GO:0051880 GO:0070034 GO:0003724 GO:0070035 GO:0001503 GO:0003725 GO:0043330 GO:0010501 GO:0005829 GO:0032206 GO:0090669	Adenosinetriphosphatase;RNA_helicase;Nucleoside-triphosphate_phosphatase	A
evm.model.scaffold116_size639307.127	390	1	NAC domain-containing protein 78-like	GO:0090502 GO:0009644 GO:0000976 GO:0009555 GO:0009962 GO:0060966 GO:0005730 GO:0004523 GO:0002237 GO:0003700 GO:0045892 GO:0045893 GO:0005737 GO:0034720 GO:0071359 GO:0010267	Acting_on_ester_bonds;Acting_on_ester_bonds;Ribonuclease_H	K
evm.model.scaffold116_size639307.95	181	3	hypothetical protein	noGO	NULL	S
evm.model.scaffold116_size639307.157	338	1	Pyridoxal kinase	GO:0042538 GO:0008615 GO:0010054 GO:0008478 GO:0005829 GO:0009443 GO:0016310	Pyridoxal_kinase	H
evm.model.scaffold116_size639307.26	305	1	60S ribosomal protein L5-like	GO:0008283 GO:0008097 GO:0005730 GO:0000027 GO:0009955 GO:0009735 GO:0005886 GO:0009965 GO:0042788 GO:0006412 GO:0006913 GO:0009507 GO:0003735 GO:0010015	NULL	J
evm.model.scaffold116_size639307.156	369	1	Gamma-glutamyl-gamma-aminobutyrate hydrolase	GO:0033969 GO:0003922 GO:0006541 GO:0006177 GO:0016740	Gamma-glutamyl-gamma-aminobutyrate_hydrolase;GMP_synthase_(glutamine-hydrolyzing)	F
evm.model.scaffold116_size639307.148	706	1	E3 ubiquitin-protein ligase HOS1	GO:0009409 GO:0004842 GO:0045892 GO:0005737 GO:0010228 GO:0009966 GO:0016567	NULL	S
evm.model.scaffold116_size639307.20	476	1	Uncharacterized protein	noGO	NULL	S
evm.model.scaffold116_size639307.78	429	1	probable arabinosyltransferase ARAD1	GO:0016020 GO:0006486 GO:0102983	Xylogalacturonan_beta-1,3-xylosyltransferase	GMW
evm.model.scaffold116_size639307.16	208	4	hypothetical protein	noGO	NULL	S
evm.model.scaffold116_size639307.96	100	1	Uncharacterized protein (Fragment)	noGO	NULL	L
evm.model.scaffold116_size639307.55	298	4	mitochondrial dicarboxylate/tricarboxylate transporter DTC	GO:0015742 GO:0015367 GO:0009506 GO:0035674 GO:0006839 GO:0015142 GO:0005618 GO:0009941 GO:0016021 GO:0071423 GO:0005774 GO:0005743	NULL	C
evm.model.scaffold116_size639307.15	286	4	Transmembrane protein	noGO	NULL	none
evm.model.scaffold116_size639307.21	431	1	Acyl-coa-binding domain-containing protein 4	GO:0010008 GO:0005515	NULL	S
evm.model.scaffold116_size639307.47	423	3	Polygalacturonase	GO:0045490 GO:0005618 GO:0016020 GO:0009830 GO:0004650 GO:0010227 GO:0005576 GO:0009901 GO:0010047	Polygalacturonase	G
evm.model.scaffold116_size639307.58	917	1	mannosylglycoprotein endo-beta-mannosidase isoform X1	GO:0033947 GO:0005975 GO:0016702 GO:0046872 GO:0031408 GO:0055114	Acting_on_single_donors_with_incorporation_of_molecular_oxygen_(oxygenases)._The_oxygen_incorporated_need_not_be_derived_from_O(2);Mannosylglycoprotein_endo-beta-mannosidase;Beta-mannosidase	G
evm.model.scaffold116_size639307.39	1378	1	Glutamate receptor	GO:0004930 GO:0071230 GO:0007186 GO:0003779 GO:0005262 GO:0070588 GO:0016021 GO:0019722 GO:0035235 GO:0044237 GO:0004970 GO:0005886	NULL	EPT
evm.model.scaffold116_size639307.37	287	1	hypothetical protein	noGO	NULL	S
evm.model.scaffold116_size639307.11	105	4	hypothetical protein	noGO	NULL	S
evm.model.scaffold116_size639307.147	1421	1	Protein transport protein sec16	GO:0043231 GO:0012505 GO:0044444 GO:0048208	NULL	U
evm.model.scaffold116_size639307.69	281	1	Kinesin-like protein	GO:0016021	NULL	S
evm.model.scaffold116_size639307.36	563	1	IQ motif, EF-hand binding site	GO:0043207 GO:0009506 GO:0009266 GO:0051087 GO:0006457	NULL	S
evm.model.scaffold116_size639307.49	609	1	probably inactive leucine-rich repeat receptor-like protein kinase At5g48380	GO:0005524 GO:0009506 GO:0016021 GO:0060548 GO:0004674 GO:0006468 GO:0042742 GO:0031348 GO:0033612 GO:0005886	Transferring_phosphorus-containing_groups	T
evm.model.scaffold116_size639307.50	275	4	Uncharacterized protein	GO:0016021	NULL	S
evm.model.scaffold116_size639307.88	103	1	hypothetical protein	noGO	NULL	S
evm.model.scaffold116_size639307.87	192	1	uncharacterized protein LOC113461697	noGO	NULL	L
evm.model.scaffold116_size639307.52	133	4	60S ribosomal protein L32	GO:0003735 GO:0006412	NULL	J
evm.model.scaffold116_size639307.116	634	1	GDP-fucose protein O-fucosyltransferase protein	GO:0005802 GO:0016021 GO:0016757 GO:0006004 GO:0052325	NULL	G
evm.model.scaffold116_size639307.113	126	1	hypothetical protein	noGO	NULL	S
evm.model.scaffold116_size639307.155	326	1	Thaumatin-like protein 1	GO:0016021	NULL	O
evm.model.scaffold116_size639307.53	187	4	protein YLS3-like	GO:0016020 GO:0008289 GO:0006869	NULL	S
evm.model.scaffold116_size639307.108	115	1	hypothetical protein	noGO	NULL	S
evm.model.scaffold116_size639307.140	343	1	DUF659 domain-containing protein/Dimer_Tnp_hAT domain-containing protein	noGO	NULL	S
evm.model.scaffold116_size639307.152	196	1	serine/threonine-protein phosphatase 7 long form homolog	noGO	NULL	S
evm.model.scaffold116_size639307.117	571	Singleton	anthranilate phosphoribosyltransferase isoform X1	GO:0005829 GO:0009570 GO:0003921 GO:0016757 GO:0006177	GMP_synthase_(glutamine-hydrolyzing)	E
evm.model.scaffold116_size639307.48	425	3	Polygalacturonase	GO:0045490 GO:0005618 GO:0016020 GO:0009830 GO:0004650 GO:0010227 GO:0005576 GO:0009901 GO:0010047	Polygalacturonase	G
evm.model.scaffold116_size639307.79	175	1	60S ribosomal protein L17-2 (Fragment)	GO:0009507 GO:0009506 GO:0003735 GO:0002181 GO:0005730 GO:0005774 GO:0005886 GO:0042788	NULL	J
evm.model.scaffold1170_size14543.2	386	1	Putative polygalacturonase	GO:0005975 GO:0005618 GO:0004650 GO:0071555 GO:0005576	Polygalacturonase	G
evm.model.scaffold1170_size14543.1	289	1	Sodium-and chloride-dependent GABA transporter like	noGO	NULL	S
evm.model.scaffold1170_size14543.3	349	1	outer envelope pore protein 37, chloroplastic	GO:0009706 GO:0005216 GO:0042802 GO:0006812 GO:0034220 GO:0031359	NULL	S
evm.model.scaffold1171_size14427.2	129	1	ethylene-responsive transcription factor ERF020-like	GO:0003677 GO:0003700 GO:0005737 GO:0006355 GO:0042631 GO:0010200	NULL	K
evm.model.scaffold1172_size14410.3	641	1	Protein gamma response 1	GO:0006281 GO:0003677 GO:0007276 GO:0010212	NULL	S
evm.model.scaffold1173_size14360.4	118	1	Membrane-anchored ubiquitin-fold protein	GO:0016020	NULL	U
evm.model.scaffold1173_size14360.3	266	1	Chaperone protein DnaJ	GO:0009507	NULL	O
evm.model.scaffold1175_size14255.3	188	1	Putative tyrosine-protein phosphatase	GO:0005737 GO:0004725 GO:1900424 GO:0035335	Protein-serine/threonine_phosphatase;Protein-tyrosine-phosphatase	V
evm.model.scaffold1175_size14255.1	581	1	hypothetical protein	noGO	NULL	S
evm.model.scaffold1176_size14172.6	167	4	Signal peptidase complex subunit 3	GO:0005618 GO:0016021 GO:0006465 GO:0045047 GO:0008233 GO:0098827 GO:0005787	NULL	U
evm.model.scaffold1176_size14172.5	602	4	Dihydroxy-acid dehydratase	GO:0009570 GO:0005507 GO:0004160 GO:0009651 GO:0009555 GO:0009553 GO:0009082	Dihydroxy-acid_dehydratase	E
evm.model.scaffold1176_size14172.4	186	4	Reactive intermediate deaminase a, chloroplastic	GO:0009570 GO:1901565 GO:0009941 GO:0016021 GO:0005829 GO:0046686 GO:0009082 GO:0019239 GO:0009579	NULL	J
evm.model.scaffold1176_size14172.7	261	4	receptor-like cytosolic serine/threonine-protein kinase RBK2 isoform X2	GO:0005524 GO:0005737 GO:0051020 GO:0007178 GO:0006468 GO:0005886 GO:0004675	Transferring_phosphorus-containing_groups	T
evm.model.scaffold1176_size14172.3	170	4	OPA3-like protein	GO:0019216	NULL	S
evm.model.scaffold1177_size14133.1	365	1	Pyruvate dehydrogenase E1 component subunit beta	GO:0006086 GO:0005759 GO:0004739 GO:0006096 GO:0055114	Pyruvate_dehydrogenase_(acetyl-transferring)	C
evm.model.scaffold1178_size13989.5	660	4	probable mitochondrial import inner membrane translocase subunit TIM21	GO:0005789 GO:0005744 GO:0006490 GO:0042281 GO:0030150 GO:0042283 GO:0090351 GO:0016021 GO:0006487 GO:0098827	NULL	K
evm.model.scaffold1178_size13989.6	104	4	Envelope glycoprotein like	GO:0016020	NULL	none
evm.model.scaffold1178_size13989.3	230	4	Putative centrin-2-like	GO:0005509	NULL	S
evm.model.scaffold1178_size13989.1	111	4	Photosystem II PsbX	GO:0050982 GO:0008381 GO:0055085 GO:0010150 GO:0097468 GO:0006820 GO:0005886 GO:0009523 GO:0015979	NULL	M
evm.model.scaffold1178_size13989.2	489	4	MLO-like protein	GO:0009607 GO:0005516 GO:0016021 GO:0006952 GO:0005886	NULL	P
evm.model.scaffold1178_size13989.4	319	4	Transcription factor GT-2	noGO	NULL	K
evm.model.scaffold1179_size13919.6	319	4	Pectate lyase	GO:0016021 GO:0030570 GO:0046872 GO:0045490	Pectate_lyase	G
evm.model.scaffold1179_size13919.5	406	4	xylulose 5-phosphate/phosphate translocator, chloroplastic	GO:0071917 GO:0015297 GO:0015120 GO:0009941 GO:0016021 GO:0051726 GO:0004693 GO:0015713 GO:0035436	Transferring_phosphorus-containing_groups;Cyclin-dependent_kinase	EG
evm.model.scaffold1179_size13919.2	224	4	Chaperone DnaJ-domain superfamily protein	GO:0009507	NULL	O
evm.model.scaffold1179_size13919.4	363	4	Putative F17A17.37 protein-like	GO:0005618 GO:0005886	NULL	S
evm.model.scaffold117_size639039.62	344	4	NAD(P)-binding Rossmann-fold superfamily protein isoform 1	GO:0009507	NULL	none
evm.model.scaffold117_size639039.44	443	1	serine/threonine-protein phosphatase 7 long form homolog	noGO	NULL	S
evm.model.scaffold117_size639039.99	2468	Singleton	piezo-type mechanosensitive ion channel homolog isoform X1	GO:0050982 GO:0008381 GO:0071260 GO:0042391 GO:0098655 GO:0005261 GO:0016021	NULL	S
evm.model.scaffold117_size639039.134	400	1	S-adenosylmethionine synthase	GO:0005524 GO:0046872 GO:0005829 GO:0006556 GO:0004478 GO:0006730	Methionine_adenosyltransferase	H
evm.model.scaffold117_size639039.137	173	Singleton	transcription initiation factor TFIID subunit 9	GO:1902065 GO:0043966 GO:0044212 GO:0006352 GO:0008134 GO:0045944 GO:0006413 GO:0000124 GO:0004402 GO:0003743 GO:0005669 GO:0046982 GO:0071339	Arylamine_N-acetyltransferase;Histone_acetyltransferase	K
evm.model.scaffold117_size639039.117	179	1	Uncharacterized protein	noGO	NULL	S
evm.model.scaffold117_size639039.29	313	Singleton	chlorophyllase-2, chloroplastic-like	GO:0009507 GO:0102293 GO:0047746 GO:0015996	Chlorophyllase;Carboxylesterase	S
evm.model.scaffold117_size639039.90	195	1	Mitochondrial inner membrane protease ATP23	GO:0033615 GO:0046872 GO:0034982 GO:0031314 GO:0004222	Acting_on_peptide_bonds_(peptidases)	L
evm.model.scaffold117_size639039.18	212	1	Ethylene-responsive transcription factor 1B	GO:0003677 GO:0003700 GO:0006355 GO:0009873 GO:0006952 GO:0009867	NULL	K
evm.model.scaffold117_size639039.139	463	Singleton	Glycylpeptide N-tetradecanoyltransferase	GO:0004379 GO:0006499	Glycylpeptide_N-tetradecanoyltransferase	I
evm.model.scaffold117_size639039.27	734	4	Cellulose synthase-like protein G2	GO:0016021 GO:0016760 GO:0030244 GO:0071555 GO:0009833 GO:0005886	Cellulose_synthase_(UDP-forming)	G
evm.model.scaffold117_size639039.95	390	1	Ole e 14.01 allergen (Fragment)	GO:0005975 GO:0005618 GO:0016020 GO:0004650 GO:0071555 GO:0005576	Polygalacturonase	G
evm.model.scaffold117_size639039.145	375	1	protein IQ-DOMAIN 31-like	GO:0005829 GO:0005875 GO:0005886 GO:0005515	NULL	S
evm.model.scaffold117_size639039.85	325	1	BTB/POZ domain-containing protein	GO:0043161 GO:0031625 GO:0005737 GO:0030162 GO:0019005	NULL	D
evm.model.scaffold117_size639039.28	96	4	EPIDERMAL PATTERNING FACTOR-like protein 5	GO:0010052	NULL	S
evm.model.scaffold117_size639039.149	303	1	Mitochondrial arginine transporter BAC2	GO:0042910 GO:0005290 GO:1903400 GO:0005292 GO:0089709 GO:0006561 GO:1903401 GO:1902616 GO:0005289 GO:0006972 GO:0005743 GO:1990575 GO:0000064 GO:0016021 GO:0015227	NULL	C
evm.model.scaffold117_size639039.34	388	4	Protein IQ-DOMAIN 14	GO:0005829 GO:0005875 GO:0005886 GO:0005515	NULL	S
evm.model.scaffold117_size639039.54	557	4	Putative F28L1.9 protein-like	GO:0016021	NULL	none
evm.model.scaffold117_size639039.60	318	3	Tubby-like F-box protein	GO:0005515	NULL	S
evm.model.scaffold117_size639039.76	417	1	hypothetical protein	noGO	NULL	S
evm.model.scaffold117_size639039.51	460	4	Heavy metal-associated isoprenylated plant protein	GO:0046872 GO:0030001	NULL	P
evm.model.scaffold117_size639039.148	676	1	Kinesin-like protein	GO:0016887 GO:0008283 GO:0035371 GO:0006890 GO:1903338 GO:0005871 GO:0000776 GO:0007018 GO:0007019 GO:0005886 GO:0051983 GO:0005524 GO:0003777 GO:0051010 GO:0005829 GO:0019886 GO:0019237 GO:0051315 GO:0030951	Adenosinetriphosphatase;Nucleoside-triphosphate_phosphatase	Z
evm.model.scaffold117_size639039.23	187	1	hypothetical protein	noGO	NULL	S
evm.model.scaffold117_size639039.98	339	1	gibberellin receptor GID1B-like	GO:0010629 GO:0080030 GO:0005737 GO:0048444 GO:0009056 GO:0048530 GO:0009939 GO:1905516 GO:0010325 GO:0010331	Carboxylesterase	V
evm.model.scaffold117_size639039.125	228	1	transcription factor bHLH36-like	GO:0003677 GO:0046983 GO:0006357	NULL	K
evm.model.scaffold117_size639039.142	639	1	Protein hothead	GO:0046593 GO:0016614 GO:0050660 GO:0007267 GO:0016021 GO:0009553 GO:0005576 GO:0010430	(R)-mandelonitrile_lyase	E
evm.model.scaffold117_size639039.38	283	4	Thiosulfate/3-mercaptopyruvate sulfurtransferase	noGO	NULL	S
evm.model.scaffold117_size639039.97	140	4	Histone H2A	GO:0003677 GO:0000790 GO:0046982 GO:0006342 GO:0000786	NULL	B
evm.model.scaffold117_size639039.24	223	4	Transcription factor bHLH104 like	GO:0010030 GO:0003700 GO:0071333 GO:0006355 GO:0043565 GO:0046983	NULL	K
evm.model.scaffold117_size639039.119	380	Singleton	BAG family molecular chaperone regulator 7-like	GO:0043207 GO:0009506 GO:0034605 GO:0051087 GO:0034620 GO:0006457 GO:0070417 GO:0005886	NULL	S
evm.model.scaffold117_size639039.87	348	3	SufE-like protein 1, chloroplastic/mitochondrial	GO:0009570 GO:0043085 GO:0008047	NULL	T
evm.model.scaffold117_size639039.11	418	1	putative E3 ubiquitin-protein ligase XBAT35 isoform X2	GO:0004842 GO:0031625 GO:0000151 GO:0005737 GO:0016567	NULL	O
evm.model.scaffold117_size639039.65	210	1	Ras-related protein RABC1	GO:0005886 GO:0003924 GO:0005525 GO:0006886 GO:0032482	Nucleoside-triphosphate_phosphatase	U
evm.model.scaffold117_size639039.91	1124	1	kinesin-like protein KIN12A	GO:0008283 GO:0006890 GO:0008574 GO:0005873 GO:0007018 GO:0000278 GO:0008017 GO:0005524 GO:0003677 GO:0005813 GO:0005819 GO:0005829 GO:0019886	Adenosinetriphosphatase;Nucleoside-triphosphate_phosphatase;Plus-end-directed_kinesin_ATPase	Z
evm.model.scaffold117_size639039.26	158	4	HR-like lesion-inducer	GO:0016021	NULL	S
evm.model.scaffold117_size639039.70	244	1	hypothetical protein	noGO	NULL	S
evm.model.scaffold117_size639039.10	203	4	Protein light-dependent short hypocotyls 4	GO:0048441 GO:0010492 GO:0090698 GO:0009299 GO:0048834 GO:0009416 GO:0010199	NULL	K
evm.model.scaffold117_size639039.147	985	1	golgin candidate 5-like	GO:0016020 GO:0005515	NULL	K
evm.model.scaffold117_size639039.5	816	4	Glutamyl-tRNA(Gln) amidotransferase subunit B, chloroplastic/mitochondrial	GO:0009570 GO:0005524 GO:0030956 GO:0005515 GO:0070681 GO:0032543 GO:0016740 GO:0050567	Glutaminyl-tRNA_synthase_(glutamine-hydrolyzing)	J
evm.model.scaffold117_size639039.135	1167	1	Spastin like	GO:0005515 GO:0005524	NULL	O
evm.model.scaffold117_size639039.150	867	1	DNA polymerase	GO:0006273 GO:1902981 GO:0006272 GO:1902975 GO:0006303 GO:0009965 GO:0001882 GO:0003896 GO:0003688 GO:0003887 GO:0005658 GO:0046982 GO:0046872 GO:0017076 GO:0071897 GO:0051539	DNA-directed_DNA_polymerase;DNA-directed_RNA_polymerase	L
evm.model.scaffold117_size639039.72	503	1	Rop guanine nucleotide exchange factor 12-like	GO:0042802 GO:0009793 GO:0005089 GO:0005886 GO:0065009 GO:0080092 GO:0090406	NULL	G
evm.model.scaffold117_size639039.74	131	1	Profilin	GO:0042989 GO:0005856 GO:0005938 GO:0003785	NULL	Z
evm.model.scaffold117_size639039.32	185	1	hypothetical protein	noGO	NULL	S
evm.model.scaffold117_size639039.130	220	1	Pyrrolidone-carboxylate peptidase	GO:0016920 GO:0006508 GO:0005829	Acting_on_peptide_bonds_(peptidases)	O
evm.model.scaffold117_size639039.66	190	1	Uncharacterized protein	noGO	NULL	S
evm.model.scaffold117_size639039.7	353	4	DUF3527 domain protein	noGO	NULL	S
evm.model.scaffold117_size639039.133	306	1	WUSCHEL-related homeobox 1	GO:0003700 GO:0099402 GO:0005829 GO:0006355 GO:0003677	NULL	K
evm.model.scaffold117_size639039.96	608	1	Protease do-like 2, chloroplastic	GO:0005515 GO:0032440 GO:0030163 GO:0006508 GO:0004252 GO:0009941 GO:0010206 GO:0055114 GO:0009658 GO:0009535	Acting_on_peptide_bonds_(peptidases);2-alkenal_reductase_(NAD(P)(+))	O
evm.model.scaffold117_size639039.89	742	1	Oligopeptide transporter 1-like	GO:0005887 GO:0035672 GO:0035673	NULL	T
evm.model.scaffold117_size639039.40	1444	4	protein TIME FOR COFFEE-like isoform X1	GO:0042752	NULL	S
evm.model.scaffold117_size639039.36	228	Singleton	Bifunctional inhibitor/plant lipid transfer protein/seed storage helical domain containing protein	GO:0016020	NULL	O
evm.model.scaffold117_size639039.121	405	1	Myelin-associated oligodendrocyte basic protein	noGO	NULL	S
evm.model.scaffold117_size639039.57	427	4	Glutamine synthetase	GO:0009570 GO:0005524 GO:0009651 GO:0009941 GO:0006542 GO:0019676 GO:0046686 GO:0007568 GO:0009735 GO:0009535 GO:0004356	Glutamine_synthetase	E
evm.model.scaffold117_size639039.81	597	1	Serine/threonine-protein phosphatase 7 long form-like	noGO	NULL	S
evm.model.scaffold117_size639039.144	307	1	Putative ovule protein	noGO	NULL	S
evm.model.scaffold117_size639039.4	496	1	Ammonium transporter	GO:0080181 GO:0008519 GO:0051258 GO:0005887 GO:0009506 GO:0015695 GO:0009737 GO:0072488 GO:0080167 GO:0043621 GO:0010311	NULL	P
evm.model.scaffold117_size639039.126	377	1	Gibberellin 20 oxidase 1	GO:0045544 GO:0080167 GO:0009686 GO:0009740 GO:0004399 GO:0009899 GO:0009826 GO:0009639 GO:0046872 GO:0005737 GO:0048366 GO:0048575 GO:0055114	Acting_on_paired_donors,_with_incorporation_or_reduction_of_molecular_oxygen._The_oxygen_incorporated_need_not_be_derived_from_O(2);Histidinol_dehydrogenase;Ent-kaurene_synthase	Q
evm.model.scaffold117_size639039.46	215	4	Protein FANTASTIC FOUR 3-like	noGO	NULL	S
evm.model.scaffold117_size639039.141	1215	1	Phospholipid-transporting ATPase	GO:0008270 GO:0010286 GO:0009860 GO:1905038 GO:0000139 GO:0005886 GO:0000287 GO:0005524 GO:0005802 GO:0005548 GO:0140326 GO:0043492 GO:0045332 GO:0016021 GO:0048194	Adenosinetriphosphatase;P-type_phospholipid_transporter;Nucleoside-triphosphate_phosphatase	P
evm.model.scaffold117_size639039.56	540	1	Alpha/beta hydrolase fold	noGO	NULL	S
evm.model.scaffold117_size639039.25	358	4	WAT1-related protein	GO:0055085 GO:0022857 GO:0016021	NULL	S
evm.model.scaffold117_size639039.48	370	4	peroxisomal adenine nucleotide carrier 1-like	GO:0016021 GO:0022857 GO:0055085	NULL	C
evm.model.scaffold117_size639039.88	348	3	SufE-like protein 1, chloroplastic/mitochondrial	GO:0009570 GO:0043085 GO:0008047	NULL	T
evm.model.scaffold117_size639039.31	143	1	Serine/threonine-protein phosphatase 7 long form-like	noGO	NULL	S
evm.model.scaffold117_size639039.1	699	4	Bifunctional dihydrofolate reductase-thymidylate synthase	GO:0004799 GO:0005829 GO:0009257 GO:0055114 GO:0006231 GO:0004146 GO:0006730 GO:0032259	Thymidylate_synthase;Dihydrofolate_reductase	H
evm.model.scaffold117_size639039.146	683	Singleton	Protein PAF1-like protein	GO:0016593 GO:0006368 GO:0016570 GO:0050789	NULL	K
evm.model.scaffold117_size639039.93	497	1	Endoglucanase	GO:0016021 GO:0030245 GO:0008810	Cellulase	G
evm.model.scaffold117_size639039.33	416	1	Putative pleckstrin-like, plant	GO:0016020 GO:0009734 GO:0010305	NULL	S
evm.model.scaffold117_size639039.100	481	1	BSD domain-containing protein 1-like	noGO	NULL	S
evm.model.scaffold117_size639039.6	281	4	28 kDa ribonucleoprotein, chloroplastic-like	GO:0003723 GO:1990904	NULL	A
evm.model.scaffold117_size639039.45	325	2	2-hydroxyisoflavanone dehydratase	GO:0009717 GO:0009056 GO:0033987 GO:0052689	2-hydroxyisoflavanone_dehydratase;Carboxylesterase	V
evm.model.scaffold117_size639039.101	415	1	Protein ALEX like	GO:0016491 GO:0055114	NULL	L
evm.model.scaffold117_size639039.94	1517	1	intron-binding protein aquarius	GO:0009507 GO:0071013 GO:0003729 GO:0004386 GO:0005886 GO:0000398	Adenosinetriphosphatase;Nucleoside-triphosphate_phosphatase	L
evm.model.scaffold117_size639039.143	794	1	Protein ROOT HAIR DEFECTIVE 3 homolog	GO:0090502 GO:0010053 GO:0005774 GO:0048309 GO:0005886 GO:0009932 GO:0003676 GO:0005789 GO:0005525 GO:0004523 GO:0006888 GO:0003924 GO:0016021 GO:0016320 GO:0030036	Acting_on_ester_bonds;Acting_on_ester_bonds;Ribonuclease_H;Nucleoside-triphosphate_phosphatase	S
evm.model.scaffold117_size639039.80	759	1	Chloride channel protein	GO:0009507 GO:1902476 GO:0016021 GO:0005247	NULL	P
evm.model.scaffold117_size639039.83	308	1	high mobility group B protein 10	GO:0009507 GO:0003700 GO:0006355 GO:0003677	NULL	K
evm.model.scaffold117_size639039.8	116	4	protein PROTON GRADIENT REGULATION 5, chloroplastic-like	GO:0009644 GO:0009773	NULL	S
evm.model.scaffold117_size639039.71	199	1	hypothetical protein	noGO	NULL	S
evm.model.scaffold117_size639039.128	217	1	Uncharacterized protein	noGO	NULL	S
evm.model.scaffold117_size639039.41	335	4	2-hydroxyisoflavanone dehydratase	GO:0009717 GO:0009056 GO:0033987 GO:0052689	2-hydroxyisoflavanone_dehydratase;Carboxylesterase	V
evm.model.scaffold117_size639039.61	371	3	Tubby-like F-box protein	GO:0005515	NULL	S
evm.model.scaffold117_size639039.3	546	4	C2 calcium-dependent membrane targeting	GO:0016787	NULL	I
evm.model.scaffold117_size639039.123	484	1	alpha-L-fucosidase 1-like	GO:0006516 GO:0016139 GO:0004560 GO:0006004 GO:0005764	Alpha-L-fucosidase	G
evm.model.scaffold117_size639039.19	116	4	Ethylene-responsive transcription factor	GO:0003700 GO:0010186 GO:0045893 GO:0090332 GO:0009873 GO:0043565 GO:0010200 GO:0009789	NULL	K
evm.model.scaffold117_size639039.136	426	1	26S protease regulatory subunit 7	GO:0005524 GO:0030163 GO:0006508 GO:0016021 GO:0005829 GO:0000502 GO:0008233 GO:0005886	NULL	O
evm.model.scaffold117_size639039.132	491	1	Phosphoethanolamine n-methyltransferase 1	GO:0009860 GO:0010183 GO:0009555 GO:0005829 GO:0006656 GO:0048528 GO:0052667 GO:0000234 GO:0042425 GO:0032259	Phosphoethanolamine_N-methyltransferase	I
evm.model.scaffold117_size639039.75	733	1	U-box domain-containing protein 52-like isoform X2	GO:0005524 GO:0004672 GO:0006468	NULL	T
evm.model.scaffold117_size639039.86	228	1	Vesicle transport protein	GO:0015031 GO:0016021 GO:0000139 GO:0000138 GO:0042147	NULL	U
evm.model.scaffold1180_size13820.1	334	1	E3 ubiquitin-protein ligase UPL7	GO:0061630 GO:0005737 GO:0016874 GO:0016798 GO:0016567	NULL	O
evm.model.scaffold1180_size13820.2	815	1	E3 ubiquitin-protein ligase UPL7	GO:0061630 GO:0061631 GO:0005737 GO:0000209 GO:0016874 GO:0006511	NULL	O
evm.model.scaffold1180_size13820.4	235	1	DNA-binding WRKY	GO:0009739 GO:0003700 GO:0045892 GO:0007263 GO:0044212 GO:0043565 GO:0042742	NULL	K
evm.model.scaffold1181_size13665.1	391	1	Serine/threonine-protein phosphatase 7 long form-like	noGO	NULL	S
evm.model.scaffold1183_size13588.1	467	1	Protein LONGIFOLIA 1 (Fragment)	noGO	NULL	S
evm.model.scaffold1183_size13588.2	601	1	pentatricopeptide repeat-containing protein At2g22410, mitochondrial-like	GO:0005515	NULL	J
evm.model.scaffold1184_size13579.2	724	1	homeobox-leucine zipper protein MERISTEM L1-like	GO:0003700 GO:0009913 GO:0006355 GO:0043565 GO:0008289 GO:0090627 GO:0009845 GO:0048825	NULL	K
evm.model.scaffold1185_size13504.2	941	1	Acyl-CoA N-acyltransferase	GO:0010385 GO:0042826 GO:0080188 GO:0043972 GO:0043971 GO:0001103 GO:0000122 GO:0004402 GO:0005813 GO:0044030 GO:0009506 GO:0042393 GO:0005737 GO:0001085 GO:0072553 GO:0016581 GO:0044154 GO:0032993	Arylamine_N-acetyltransferase;Histone_acetyltransferase	S
evm.model.scaffold1185_size13504.3	569	1	Mannosyltransferase	GO:0005789 GO:0006490 GO:0097502 GO:0016021 GO:0004377 GO:0030433	GDP-Man:Man(3)GlcNAc(2)-PP-dolichol_alpha-1,2-mannosyltransferase	G
evm.model.scaffold1187_size13460.1	608	4	Putative ovule protein	noGO	NULL	none
evm.model.scaffold1187_size13460.6	631	4	Armadillo repeat only 1	GO:0005737 GO:0090404 GO:0005515 GO:0007166 GO:0009860 GO:0030036	NULL	S
evm.model.scaffold1187_size13460.2	216	4	54S ribosomal protein L24, mitochondrial	GO:0003735 GO:0005762 GO:0006412	NULL	J
evm.model.scaffold1187_size13460.3	534	4	Pentatricopeptide repeat-containing protein	GO:0090305 GO:0003723 GO:0005515 GO:0004519 GO:0080156	NULL	S
evm.model.scaffold1187_size13460.5	326	4	Katanin p80 WD40 repeat-containing subunit B1 homolog	GO:0080008 GO:0005874 GO:0008352 GO:0008017 GO:0016740 GO:0051013	NULL	Z
evm.model.scaffold1188_size13387.3	685	1	Serine protease SPPA, chloroplastic	GO:0004252 GO:0009941 GO:0016021 GO:0006465 GO:0009535	Acting_on_peptide_bonds_(peptidases)	OU
evm.model.scaffold1188_size13387.2	488	1	enolase 1, chloroplastic-like	GO:0009570 GO:0000287 GO:0004634 GO:0006096 GO:0000015 GO:0009735	Phosphopyruvate_hydratase	G
evm.model.scaffold1188_size13387.1	254	1	protein CHAPERONE-LIKE PROTEIN OF POR1, chloroplastic	GO:0009570 GO:0009706 GO:0008219 GO:0005515 GO:0044183 GO:0009793 GO:0003824 GO:0061077 GO:0016021 GO:1904216 GO:0009658 GO:0009535	NULL	S
evm.model.scaffold1189_size13384.1	119	1	hypothetical protein	noGO	NULL	S
evm.model.scaffold1189_size13384.3	309	1	Serine/threonine-protein phosphatase 7 long form-like	noGO	NULL	S
evm.model.scaffold118_size635519.97	148	4	Putative ovule protein	noGO	NULL	none
evm.model.scaffold118_size635519.101	417	4	DUF21 domain-containing protein	GO:0016021 GO:0004386	Adenosinetriphosphatase;Nucleoside-triphosphate_phosphatase	S
evm.model.scaffold118_size635519.107	200	Singleton	Ribosomal protein S1	GO:0043229 GO:0044444	NULL	S
evm.model.scaffold118_size635519.61	369	1	DNA-damage-repair/toleration protein	GO:0000166 GO:0009507 GO:0009506 GO:0005515 GO:0032041 GO:0005618 GO:0016020 GO:0070932	Histone_deacetylase	L
evm.model.scaffold118_size635519.68	203	1	ESCRT-related protein like	GO:0009793 GO:0032509 GO:0045324 GO:0005770 GO:0000578 GO:0006623	NULL	U
evm.model.scaffold118_size635519.75	346	1	Protein srg1	GO:0046872 GO:0016706 GO:0055114	Acting_on_paired_donors,_with_incorporation_or_reduction_of_molecular_oxygen._The_oxygen_incorporated_need_not_be_derived_from_O(2)	Q
evm.model.scaffold118_size635519.73	1213	1	Phospholipid-transporting ATPase	GO:0008270 GO:0010286 GO:0009860 GO:1905038 GO:0000139 GO:0005886 GO:0000287 GO:0005524 GO:0005802 GO:0005548 GO:0140326 GO:0043492 GO:0045332 GO:0016021 GO:0048194	Adenosinetriphosphatase;P-type_phospholipid_transporter;Nucleoside-triphosphate_phosphatase	P
evm.model.scaffold118_size635519.111	269	1	Uncharacterized protein	noGO	NULL	L
evm.model.scaffold118_size635519.69	519	1	Serine/threonine-protein phosphatase 2A 55 kDa regulatory subunit B	GO:0004722 GO:0070262 GO:0005515 GO:0005829 GO:0043666 GO:0000159 GO:0032502 GO:0000278 GO:0019888	Protein-serine/threonine_phosphatase	T
evm.model.scaffold118_size635519.94	196	1	Transcription factor MYB1R1 like	GO:0003677	NULL	K
evm.model.scaffold118_size635519.104	575	Singleton	Nuclear pore complex protein NDC1a	GO:0016021	NULL	S
evm.model.scaffold118_size635519.100	101	Singleton	Anaphase-promoting complex subunit 15	GO:0005680 GO:0090266	NULL	S
evm.model.scaffold118_size635519.90	956	1	Plasma membrane ATPase	GO:0005524 GO:0051453 GO:0046872 GO:0120029 GO:0016021 GO:0008553 GO:0005886 GO:0016787	P-type_H(+)-exporting_transporter	P
evm.model.scaffold118_size635519.22	215	1	uncharacterized protein LOC113461697	noGO	NULL	L
evm.model.scaffold118_size635519.5	247	1	Putative tRNA (Cytidine(34)-2-O)-methyltransferase (Fragment)	GO:0008173 GO:0003723 GO:0002131 GO:0002132 GO:0006995	NULL	J
evm.model.scaffold118_size635519.56	305	1	DNA binding protein, putative	GO:0046983	NULL	K
evm.model.scaffold118_size635519.9	633	Singleton	Nuclear protein localization protein	noGO	NULL	S
evm.model.scaffold118_size635519.8	319	1	Pectate lyase	GO:0016020 GO:0030570 GO:0046872 GO:0045490	Pectate_lyase	G
evm.model.scaffold118_size635519.79	671	1	kelch domain-containing protein 4	GO:0003676 GO:0005515	NULL	S
evm.model.scaffold118_size635519.88	941	3	ABC transporter A family member 7	GO:0005524 GO:0006869 GO:0015709 GO:0005319 GO:0043492 GO:0043231 GO:1902358 GO:0016021 GO:0015419 GO:0102025 GO:0015405	Adenosinetriphosphatase;Acting_on_acid_anhydrides;ABC-type_sulfate_transporter;Nucleoside-triphosphate_phosphatase	Q
evm.model.scaffold118_size635519.29	95	1	Uncharacterized protein	GO:0006807 GO:0043170 GO:0044238	NULL	L
evm.model.scaffold118_size635519.93	450	1	magnesium transporter MRS2-3	noGO	NULL	P
evm.model.scaffold118_size635519.102	773	1	Amine oxidase	GO:0005507 GO:0008131 GO:0048038 GO:0009308 GO:0055114	Primary-amine_oxidase	Q
evm.model.scaffold118_size635519.103	297	4	28 kDa ribonucleoprotein, chloroplastic-like	GO:0009507 GO:0003723 GO:0006396	NULL	A
evm.model.scaffold118_size635519.65	1140	1	MMS19 nucleotide excision repair protein homolog isoform X1	GO:0097428	NULL	KL
evm.model.scaffold118_size635519.112	427	4	Putative folate-biopterin transporter 7	GO:0016021	NULL	S
evm.model.scaffold118_size635519.6	1323	Singleton	abnormal spindle-like microcephaly-associated protein homolog isoform X4	GO:0005515	NULL	Z
evm.model.scaffold118_size635519.86	300	Singleton	Myb-like protein	noGO	NULL	none
evm.model.scaffold118_size635519.76	1097	1	Putative mediator of RNA polymerase II transcription subunit 15-like	GO:0000124 GO:0003712	NULL	S
evm.model.scaffold118_size635519.89	965	3	ABC transporter A family member 2-like	GO:0005524 GO:0015245 GO:0015908 GO:1905039 GO:0015709 GO:0043492 GO:1902358 GO:0016021 GO:0048316 GO:0015419 GO:0102025 GO:0015405	Adenosinetriphosphatase;Acting_on_acid_anhydrides;ABC-type_sulfate_transporter;Nucleoside-triphosphate_phosphatase	I
evm.model.scaffold118_size635519.4	119	1	Uncharacterized protein	noGO	NULL	L
evm.model.scaffold118_size635519.13	87	1	hypothetical protein	noGO	NULL	S
evm.model.scaffold118_size635519.27	350	1	uncharacterized protein LOC104588768	noGO	NULL	L
evm.model.scaffold118_size635519.7	629	Singleton	neurochondrin-like isoform X1	noGO	NULL	S
evm.model.scaffold118_size635519.80	357	1	DNA-(apurinic or apyrimidinic site) lyase	GO:0090305 GO:0016889 GO:0009507 GO:0006284 GO:0004528 GO:0046872 GO:0008311 GO:0004672 GO:0006468 GO:0140078	Acting_on_ester_bonds;DNA-(apurinic_or_apyrimidinic_site)_lyase;Acting_on_ester_bonds;Acting_on_ester_bonds;Acting_on_ester_bonds;Phosphodiesterase_I	L
evm.model.scaffold118_size635519.46	174	1	hypothetical protein	noGO	NULL	S
evm.model.scaffold118_size635519.74	696	1	phospholipid:diacylglycerol acyltransferase 1-like	GO:0019432 GO:0016021 GO:0004144 GO:0046027	Diacylglycerol_O-acyltransferase;Arylamine_N-acetyltransferase;Phospholipid:diacylglycerol_acyltransferase	I
evm.model.scaffold118_size635519.1	850	1	Chromatin assembly factor 1 subunit fas1	GO:0008283 GO:0033186 GO:0000724 GO:0009555 GO:0045787 GO:0009934 GO:0006334 GO:0042393 GO:0010449 GO:0048366 GO:0031507 GO:0010448 GO:0010026 GO:0010389	NULL	B
evm.model.scaffold118_size635519.67	440	1	IAA-amino acid hydrolase ILR1-like 4	GO:0008173 GO:0001510 GO:0009611 GO:0006396 GO:0010112 GO:0005886 GO:0010179	NULL	G
evm.model.scaffold118_size635519.3	517	1	apyrase 2-like	GO:0102491 GO:0015267 GO:0102490 GO:0055085 GO:0102489 GO:0016021 GO:0102486 GO:0102485 GO:0102488 GO:0102487	Apyrase	F
evm.model.scaffold118_size635519.98	710	4	probable boron transporter 2	GO:0015698 GO:0005887 GO:0051453 GO:0005452	NULL	P
evm.model.scaffold118_size635519.32	493	1	Uncharacterized protein	noGO	NULL	S
evm.model.scaffold118_size635519.72	121	1	Epidermal patterning factor-like protein 3	GO:0010052 GO:0016310 GO:0016301	NULL	S
evm.model.scaffold118_size635519.108	288	1	Thioredoxin-like fold protein	GO:0005886 GO:0009055 GO:0015035 GO:0022900 GO:0045454	NULL	O
evm.model.scaffold118_size635519.66	654	1	DNA repair protein RadA-like isoform X1	GO:0005524 GO:0008094 GO:0000725 GO:0004386 GO:0003684	Adenosinetriphosphatase;Nucleoside-triphosphate_phosphatase	L
evm.model.scaffold118_size635519.78	423	1	RNA-binding with multiple splicing 2	GO:0048661 GO:0030514 GO:0042803 GO:0005737 GO:0003729 GO:0051151 GO:0048557 GO:0016021 GO:0035614 GO:0000398	NULL	A
evm.model.scaffold1193_size13189.1	212	1	Putative ovule protein	GO:0009838 GO:0009507 GO:0090693 GO:0010256 GO:0016021	NULL	S
evm.model.scaffold1194_size13167.2	199	1	Clathrin light chain	GO:0032050 GO:0072583 GO:0030130 GO:0005198 GO:0030132 GO:0005829 GO:0006886	NULL	U
evm.model.scaffold1195_size13126.1	1086	1	Eukaryotic translation initiation factor 3 subunit A	GO:0003743 GO:0043614 GO:0001732 GO:0071541 GO:0016282 GO:0071540 GO:0003729 GO:0005829 GO:0000502 GO:0033290 GO:0002188 GO:0005886	NULL	J
evm.model.scaffold1196_size13094.3	659	3	Pathogenesis-related homeodomain protein	GO:0003700 GO:0045893 GO:0043565 GO:0009733	NULL	K
evm.model.scaffold1197_size12925.1	582	1	COP1-interacting protein 7	GO:0015995 GO:0009718 GO:0045893 GO:0009416 GO:0005886	NULL	S
evm.model.scaffold1197_size12925.2	262	1	DnaJ domain containing protein	noGO	NULL	O
evm.model.scaffold1198_size12897.1	80	1	General vesicular transport factor p115 like	noGO	NULL	none
evm.model.scaffold119_size622808.134	267	1	Alpha carbonic anhydrase 1, chloroplastic	GO:0009570 GO:0008270 GO:0004089	Carbonic_anhydrase	P
evm.model.scaffold119_size622808.24	339	Singleton	DUF724 domain-containing protein	noGO	NULL	S
evm.model.scaffold119_size622808.51	156	1	hypothetical protein	noGO	NULL	S
evm.model.scaffold119_size622808.59	103	1	Uncharacterized protein (Fragment)	noGO	NULL	S
evm.model.scaffold119_size622808.53	479	1	DUF659 domain-containing protein/Dimer_Tnp_hAT domain-containing protein	GO:0046983	NULL	S
evm.model.scaffold119_size622808.23	544	1	Mitochondrial group I intron splicing factor like	noGO	NULL	S
evm.model.scaffold119_size622808.56	132	1	serine/threonine-protein phosphatase 7 long form homolog	noGO	NULL	S
evm.model.scaffold119_size622808.68	530	1	Pectinesterase	GO:0045490 GO:0009617 GO:0043086 GO:0045330 GO:0005618 GO:0016021 GO:0005576 GO:0042545 GO:0046910 GO:0030599	Pectinesterase;Carboxylesterase	G
evm.model.scaffold119_size622808.45	231	1	Gamma-interferon-inducible lysosomal thiol reductase	GO:0016021	NULL	O
evm.model.scaffold119_size622808.17	198	1	Uncharacterized protein	noGO	NULL	S
evm.model.scaffold119_size622808.34	514	1	Uncharacterized protein	noGO	NULL	S
evm.model.scaffold119_size622808.4	116	4	protein PROTON GRADIENT REGULATION 5, chloroplastic-like	GO:0009507 GO:0009055 GO:0009644 GO:0009773	NULL	S
evm.model.scaffold119_size622808.3	435	4	Putative ovule protein	noGO	NULL	S
evm.model.scaffold119_size622808.5	922	1	splicing factor U2af large subunit B	GO:0000243 GO:0089701 GO:0030628 GO:0008187 GO:0016607 GO:0003729 GO:0071004 GO:0046833 GO:0000398	NULL	A
evm.model.scaffold119_size622808.78	79	1	DUF659 domain-containing protein/Dimer_Tnp_hAT domain-containing protein (Fragment)	GO:0005488	NULL	S
evm.model.scaffold119_size622808.26	257	1	pentatricopeptide repeat-containing protein At4g18975, chloroplastic	GO:0005515	NULL	S
evm.model.scaffold119_size622808.62	203	1	hypothetical protein	noGO	NULL	S
evm.model.scaffold119_size622808.175	456	1	Glycosyltransferase	GO:0016758	NULL	CG
evm.model.scaffold119_size622808.21	370	4	WAT1-related protein	GO:0055085 GO:0022857 GO:0016021	NULL	S
evm.model.scaffold119_size622808.67	298	1	vacuolar protein sorting-associated protein 27 isoform X1	GO:0045732 GO:0016567 GO:0005515 GO:0046872	NULL	TU
evm.model.scaffold119_size622808.145	694	1	probable pre-mRNA-splicing factor ATP-dependent RNA helicase DEAH9 isoform X1	GO:0005524 GO:0003723 GO:0009506 GO:0003724 GO:0070035 GO:0008186 GO:0005829 GO:0005681 GO:0000398	Adenosinetriphosphatase;RNA_helicase;Nucleoside-triphosphate_phosphatase	A
evm.model.scaffold119_size622808.81	154	1	CASP-like protein	GO:0005886 GO:0016021	NULL	S
evm.model.scaffold119_size622808.172	193	1	Uncharacterized protein	noGO	NULL	L
evm.model.scaffold119_size622808.54	158	Singleton	Putative beta-1,4-xylosyltransferase IRX10L	GO:0016021 GO:0005506 GO:0016757 GO:0006486	NULL	none
evm.model.scaffold119_size622808.2	902	1	Putative S-adenosyl-L-methionine-dependent methyltransferase	GO:0005515 GO:0016740	NULL	none
evm.model.scaffold119_size622808.63	132	1	serine/threonine-protein phosphatase 7 long form homolog	noGO	NULL	S
evm.model.scaffold119_size622808.131	254	1	Uncharacterized protein	noGO	NULL	S
evm.model.scaffold119_size622808.7	1429	1	tetratricopeptide repeat protein 7A-like	GO:0046854 GO:0005829 GO:0005886 GO:0072659 GO:0003824 GO:0005515 GO:0030246 GO:0005975	NULL	T
evm.model.scaffold119_size622808.22	157	4	HR-like lesion-inducer	GO:0016021 GO:0016740	NULL	S
evm.model.scaffold119_size622808.6	141	Singleton	50s ribosomal protein l28, chloroplastic	GO:0009570 GO:0003735 GO:0016020 GO:0009941 GO:0006412	NULL	J
evm.model.scaffold119_size622808.10	118	4	Ethylene-responsive transcription factor	GO:0003700 GO:0010186 GO:0045893 GO:0090332 GO:0043565 GO:0009789	NULL	K
evm.model.scaffold119_size622808.1	802	1	probable methionine--tRNA ligase	GO:0005524 GO:0004825 GO:0006431 GO:0005829 GO:0046686 GO:0000049	Methionine--tRNA_ligase	J
evm.model.scaffold119_size622808.173	103	1	hypothetical protein	noGO	NULL	S
evm.model.scaffold119_size622808.176	202	1	CASP-like protein	GO:0009506 GO:0043424 GO:0051536 GO:0005886	NULL	S
evm.model.scaffold119_size622808.25	1017	1	MATH domain-containing protein At5g43560-like	GO:1905037 GO:0045087 GO:0005829 GO:0043424 GO:0005886	NULL	S
evm.model.scaffold119_size622808.57	163	1	Serine/threonine-protein phosphatase 7 long form	noGO	NULL	S
evm.model.scaffold119_size622808.18	174	1	hypothetical protein	noGO	NULL	S
evm.model.scaffold119_size622808.20	223	4	Transcription factor bHLH104 like	GO:0010030 GO:0003700 GO:0071333 GO:0006355 GO:0043565 GO:0046983	NULL	K
evm.model.scaffold11_size1489916.284	1700	1	protein PHOTOPERIOD-INDEPENDENT EARLY FLOWERING 1	GO:0016887 GO:0016458 GO:0016514 GO:0005524 GO:0042393 GO:0005618 GO:0043486 GO:0000812 GO:0046686 GO:0042742	Adenosinetriphosphatase;Nucleoside-triphosphate_phosphatase	KL
evm.model.scaffold11_size1489916.29	390	3	tRNA-splicing ligase RtcB	GO:0003824	NULL	S
evm.model.scaffold11_size1489916.296	376	1	acetylajmalan esterase-like	noGO	NULL	S
evm.model.scaffold11_size1489916.54	245	1	Anaphase-promoting complex (APC), subunit 11	GO:0061630 GO:0043161 GO:0080167 GO:0016567 GO:0016021	NULL	O
evm.model.scaffold11_size1489916.323	335	1	hypothetical protein	noGO	NULL	S
evm.model.scaffold11_size1489916.263	105	1	hypothetical protein	noGO	NULL	S
evm.model.scaffold11_size1489916.56	266	1	ELMO domain-containing protein A-like isoform X1	GO:0048870 GO:0030837 GO:0005737 GO:0045159 GO:0030100 GO:0050764	NULL	S
evm.model.scaffold11_size1489916.64	451	1	Protein TRIGALACTOSYLDIACYLGLYCEROL 4, chloroplastic	GO:0005774 GO:0009941 GO:1990052	NULL	S
evm.model.scaffold11_size1489916.33	428	1	Cobyrinate a,c-diamide synthase	GO:0008233 GO:0006508 GO:0009651 GO:0009737	NULL	S
evm.model.scaffold11_size1489916.212	334	1	uncharacterized protein LOC104603216	noGO	NULL	S
evm.model.scaffold11_size1489916.349	182	1	hypothetical protein	noGO	NULL	S
evm.model.scaffold11_size1489916.234	237	1	Senescence-associated protein, putative (Fragment)	noGO	NULL	S
evm.model.scaffold11_size1489916.125	326	1	uncharacterized protein LOC113461697	noGO	NULL	L
evm.model.scaffold11_size1489916.170	291	1	S-adenosyl-L-methionine-dependent methyltransferase	GO:0016021 GO:0008168 GO:0032259	NULL	S
evm.model.scaffold11_size1489916.168	281	1	Serine/threonine-protein phosphatase 7 long form-like	noGO	NULL	S
evm.model.scaffold11_size1489916.79	219	1	Cyclin	GO:0019901 GO:0000079	NULL	S
evm.model.scaffold11_size1489916.203	156	1	Centromere specific histone H3 variant	GO:0051301 GO:0034508 GO:0046982 GO:0031492 GO:0051307 GO:0000775 GO:0000786 GO:0006334	NULL	B
evm.model.scaffold11_size1489916.365	710	4	Putative ovule protein (Fragment)	noGO	NULL	S
evm.model.scaffold11_size1489916.187	462	1	E3 ubiquitin-protein ligase CHFR	GO:0000166 GO:0031648 GO:0061630 GO:0007093 GO:0016605 GO:0046872 GO:0000209 GO:0031398 GO:0032436 GO:0016874	NULL	O
evm.model.scaffold11_size1489916.337	121	1	hypothetical protein	noGO	NULL	S
evm.model.scaffold11_size1489916.28	390	3	Carboxyl-terminal peptidase	GO:0003824	NULL	S
evm.model.scaffold11_size1489916.333	130	1	hypothetical protein	noGO	NULL	S
evm.model.scaffold11_size1489916.80	703	1	Bromodomain adjacent to zinc finger domain 1A	noGO	NULL	S
evm.model.scaffold11_size1489916.2	306	4	Epoxide hydrolase 3	GO:0016746 GO:0047372	Acylglycerol_lipase;Carboxylesterase	S
evm.model.scaffold11_size1489916.117	61	1	Uncharacterized protein	noGO	NULL	S
evm.model.scaffold11_size1489916.302	580	2	pentatricopeptide repeat-containing protein At2g29760, chloroplastic	GO:0090305 GO:0009507 GO:0008270 GO:0003723 GO:0005515 GO:0009451 GO:0004519 GO:0031425	NULL	S
evm.model.scaffold11_size1489916.136	100	3	hypothetical protein	noGO	NULL	S
evm.model.scaffold11_size1489916.275	551	1	L-ascorbate oxidase homolog	GO:0005507 GO:0055114 GO:0008447	Acting_on_diphenols_and_related_substances_as_donors;L-ascorbate_oxidase	Q
evm.model.scaffold11_size1489916.78	127	4	Histone deacetylase complex subunit like	noGO	NULL	S
evm.model.scaffold11_size1489916.53	108	1	hypothetical protein	noGO	NULL	S
evm.model.scaffold11_size1489916.283	329	1	Putative F-box/LRR-repeat protein At3g59170	GO:0005515	NULL	S
evm.model.scaffold11_size1489916.318	725	1	proline-rich receptor-like protein kinase PERK9	GO:0019901 GO:0005524 GO:0016021 GO:0007178 GO:0005199 GO:0006468 GO:0005886 GO:0004675	Transferring_phosphorus-containing_groups	T
evm.model.scaffold11_size1489916.186	722	1	uncharacterized mitochondrial protein ymf11	GO:0003964 GO:0006278 GO:0006397	RNA-directed_DNA_polymerase	S
evm.model.scaffold11_size1489916.274	1277	Singleton	Cullin-associated nedd8-dissociated protein 1	GO:0005618 GO:0005829 GO:0010228 GO:0010265 GO:0005886 GO:0016567 GO:0009733	NULL	O
evm.model.scaffold11_size1489916.69	122	1	Acyl carrier protein	GO:0005759 GO:0005829 GO:0009245 GO:0031177 GO:0006633 GO:0000036 GO:0000035	NULL	I
evm.model.scaffold11_size1489916.167	431	1	Pectin acetylesterase	GO:0052793 GO:0016021 GO:0071555 GO:0005576	Carboxylesterase	M
evm.model.scaffold11_size1489916.17	428	1	Uncharacterized protein	noGO	NULL	S
evm.model.scaffold11_size1489916.165	337	Singleton	Nudix hydrolase 2	GO:0006979 GO:0047631 GO:0051287 GO:0005829	ADP-ribose_diphosphatase	T
evm.model.scaffold11_size1489916.73	472	4	Serine/threonine-protein kinase samkB	noGO	NULL	none
evm.model.scaffold11_size1489916.185	597	1	serine/threonine-protein phosphatase 7 long form homolog	noGO	NULL	S
evm.model.scaffold11_size1489916.11	527	1	Nucleobase-ascorbate transporter 2	GO:0055085 GO:0009506 GO:0022857 GO:0016021	NULL	F
evm.model.scaffold11_size1489916.26	98	1	hypothetical protein	noGO	NULL	S
evm.model.scaffold11_size1489916.290	397	Singleton	Uncharacterized protein	noGO	NULL	S
evm.model.scaffold11_size1489916.6	653	4	vicilin-like seed storage protein At2g18540	GO:0016020 GO:0045735	NULL	S
evm.model.scaffold11_size1489916.15	557	1	hypothetical protein	noGO	NULL	S
evm.model.scaffold11_size1489916.171	713	1	1-deoxy-D-xylulose-5-phosphate synthase	GO:0008661 GO:0016114	1-deoxy-D-xylulose-5-phosphate_synthase	G
evm.model.scaffold11_size1489916.84	253	1	uncharacterized protein LOC113461697	noGO	NULL	L
evm.model.scaffold11_size1489916.292	121	1	Squamosa promoter-binding-like protein	GO:0003677 GO:0003700 GO:0046872 GO:0006355	NULL	K
evm.model.scaffold11_size1489916.273	373	1	Putative ovule protein	GO:0016020	NULL	none
evm.model.scaffold11_size1489916.162	159	1	hypothetical protein	noGO	NULL	S
evm.model.scaffold11_size1489916.348	269	1	hypothetical protein	noGO	NULL	S
evm.model.scaffold11_size1489916.148	218	1	Cytokinin riboside 5-monophosphate phosphoribohydrolase	GO:0005829 GO:0016799 GO:0016829 GO:0009691	NULL	H
evm.model.scaffold11_size1489916.95	136	1	Uncharacterized protein	noGO	NULL	L
evm.model.scaffold11_size1489916.10	261	1	Putative ubiquitin-like-specific protease 2A	GO:0070140 GO:0009651 GO:0016926 GO:0010228 GO:0070139	Acting_on_peptide_bonds_(peptidases)	O
evm.model.scaffold11_size1489916.71	445	1	nucleolar GTP-binding protein 1	GO:0005525 GO:0016787	NULL	S
evm.model.scaffold11_size1489916.287	499	1	putative glycerol-3-phosphate transporter 5	GO:0055062 GO:0055085 GO:0022857 GO:0016021	NULL	G
evm.model.scaffold11_size1489916.218	336	1	Uncharacterized protein	noGO	NULL	L
evm.model.scaffold11_size1489916.291	434	1	Mitochondrial/choloroplast ribosomal protein S15	GO:0005840 GO:0003735 GO:0006412	NULL	J
evm.model.scaffold11_size1489916.158	357	Singleton	alkylated DNA repair protein alkB homolog 8-like	GO:0008270 GO:0008198 GO:0016706 GO:0005829 GO:0055114 GO:0002098 GO:0030488 GO:0000049 GO:0016300	Acting_on_paired_donors,_with_incorporation_or_reduction_of_molecular_oxygen._The_oxygen_incorporated_need_not_be_derived_from_O(2)	Q
evm.model.scaffold11_size1489916.57	203	1	Putative WRKY transcription factor 12	GO:0003700 GO:0006355 GO:0043565	NULL	K
evm.model.scaffold11_size1489916.368	721	4	Beta-galactosidase	GO:0005975 GO:0009506 GO:0005618 GO:0030246 GO:0004565	Beta-galactosidase	G
evm.model.scaffold11_size1489916.256	96	1	hypothetical protein	noGO	NULL	S
evm.model.scaffold11_size1489916.70	207	4	Ras-related protein RABH1b	GO:0005829 GO:0003924 GO:0005525 GO:0006886 GO:0006890 GO:0006891 GO:0032482 GO:0042147	Nucleoside-triphosphate_phosphatase	U
evm.model.scaffold11_size1489916.51	251	1	hypothetical protein	noGO	NULL	S
evm.model.scaffold11_size1489916.31	290	Singleton	GPI inositol-deacylase PGAP1-like protein	GO:0009507 GO:0016788	NULL	S
evm.model.scaffold11_size1489916.332	317	1	MYB-like putative GARP-type transcription factor	GO:0010492 GO:0055062 GO:0010082 GO:0080022 GO:0010380 GO:0080036 GO:0080113 GO:0043565 GO:1901699 GO:0000156 GO:0009414 GO:0009788 GO:0003700 GO:0031537 GO:0045892 GO:0000160 GO:0090506 GO:0016036 GO:0032107 GO:0090548	NULL	K
evm.model.scaffold11_size1489916.63	135	Singleton	10 kDa chaperonin-like	GO:0009570 GO:0019904 GO:0005759 GO:0046872 GO:0051087 GO:0009941 GO:0051085 GO:0051082 GO:0006986	NULL	O
evm.model.scaffold11_size1489916.261	207	1	hypothetical protein	noGO	NULL	S
evm.model.scaffold11_size1489916.133	100	3	hypothetical protein	noGO	NULL	S
evm.model.scaffold11_size1489916.356	112	Singleton	Heavy metal-associated domain, HMA	GO:0046872 GO:0030001	NULL	none
evm.model.scaffold11_size1489916.65	382	Singleton	Vacuolar protein sorting-associated protein	GO:0036010 GO:0005770 GO:0006897 GO:0006623 GO:0005886 GO:0006895 GO:0005525 GO:0030139 GO:0000011 GO:0005769 GO:0003924 GO:0061709 GO:0036258 GO:0032511	Nucleoside-triphosphate_phosphatase	S
evm.model.scaffold11_size1489916.19	153	1	MLP-like protein 34-like	GO:0009507 GO:0006952	NULL	S
evm.model.scaffold11_size1489916.215	451	1	Uncharacterized protein	noGO	NULL	S
evm.model.scaffold11_size1489916.9	100	1	hypothetical protein	noGO	NULL	S
evm.model.scaffold11_size1489916.339	215	1	protein MAIN-LIKE 1-like	noGO	NULL	S
evm.model.scaffold11_size1489916.108	150	1	uncharacterized protein LOC107775461	noGO	NULL	L
evm.model.scaffold11_size1489916.293	696	Singleton	Glyoxysomal processing protease, glyoxysomal	GO:0005777 GO:0004252 GO:0016485	Acting_on_peptide_bonds_(peptidases)	O
evm.model.scaffold11_size1489916.305	516	2	pentatricopeptide repeat-containing protein At2g29760, chloroplastic	GO:0090305 GO:0009507 GO:0008270 GO:0003723 GO:0005515 GO:0009451 GO:0004519 GO:0031425	NULL	S
evm.model.scaffold11_size1489916.143	485	Singleton	Transcription initiation factor IIB	GO:0008270 GO:0060261 GO:0000979 GO:0000988 GO:0001139 GO:0009527 GO:0006413 GO:0044877 GO:0000991 GO:0000990 GO:0003743 GO:0097550 GO:0051123 GO:1990114 GO:0001174 GO:0000182 GO:0017025 GO:0140110 GO:0031334	NULL	K
evm.model.scaffold11_size1489916.340	82	1	hypothetical protein	noGO	NULL	S
evm.model.scaffold11_size1489916.159	103	3	Snakin-2 like	noGO	NULL	S
evm.model.scaffold11_size1489916.5	146	4	Anti-sigma-I factor RsgI6 like	noGO	NULL	S
evm.model.scaffold11_size1489916.359	244	4	Adenylate kinase	GO:0004017 GO:0005524 GO:0006163 GO:0005737 GO:0046940 GO:0016310	Nucleoside-phosphate_kinase;Adenylate_kinase	F
evm.model.scaffold11_size1489916.288	248	1	Pre-mrna-splicing factor spf27-like protein	GO:0071013 GO:0009870 GO:0071011 GO:0010204 GO:0000974 GO:0006397 GO:0050832 GO:0005730 GO:0042742	NULL	A
evm.model.scaffold11_size1489916.279	270	1	No apical meristem (NAM) protein	GO:0003677 GO:0003700 GO:0006355	NULL	K
evm.model.scaffold11_size1489916.34	569	2	BTB/POZ domain-containing protein At5g17580-like	noGO	NULL	S
evm.model.scaffold11_size1489916.375	312	4	Putative WRKY transcription factor 21	GO:0005516 GO:0003700 GO:0019760 GO:0006355 GO:0043565	NULL	K
evm.model.scaffold11_size1489916.363	899	4	formin-binding protein 4 isoform X1	GO:0016607 GO:0005515	NULL	A
evm.model.scaffold11_size1489916.77	591	1	(-)-alpha-terpineol synthase	GO:0009570 GO:0016106 GO:0034002 GO:0009611 GO:0009753 GO:0080015 GO:0080027 GO:0009625 GO:0000287 GO:0052578 GO:0050551 GO:0050552 GO:0051762 GO:0050550 GO:0043693 GO:0005829 GO:0016099 GO:0034768	(R)-limonene_synthase;Carbon-oxygen_lyases;Myrcene_synthase;(E)-beta-ocimene_synthase;(4S)-limonene_synthase	S
evm.model.scaffold11_size1489916.38	399	1	Uncharacterized protein	noGO	NULL	L
evm.model.scaffold11_size1489916.156	103	1	hypothetical protein	noGO	NULL	S
evm.model.scaffold11_size1489916.210	309	1	Uncharacterized protein	noGO	NULL	S
evm.model.scaffold11_size1489916.30	143	1	Upstream activation factor subunit spp27 like	GO:0000500 GO:0045943 GO:0005515	NULL	K
evm.model.scaffold11_size1489916.370	324	4	protein ABHD11	GO:0005524 GO:0016787	NULL	S
evm.model.scaffold11_size1489916.199	113	1	Serine/threonine-protein phosphatase 7 long form-like	noGO	NULL	S
evm.model.scaffold11_size1489916.285	1123	1	Protein TOPLESS isoform A	GO:0042803 GO:0045892 GO:0010072 GO:0005829 GO:0009867 GO:0009733	NULL	S
evm.model.scaffold11_size1489916.107	136	1	hypothetical protein	noGO	NULL	S
evm.model.scaffold11_size1489916.258	106	1	Uncharacterized protein	GO:0006807 GO:0043170 GO:0044238	NULL	L
evm.model.scaffold11_size1489916.177	177	1	hypothetical protein	noGO	NULL	S
evm.model.scaffold11_size1489916.76	266	Singleton	Nuclear pore complex protein nup62	GO:0042306 GO:0007283 GO:0008285 GO:0043123 GO:0007166 GO:0005642 GO:0042169 GO:0005543 GO:0000278 GO:0046966 GO:0044613 GO:0031965 GO:0043130 GO:0045893 GO:0043066 GO:0010930 GO:0019894 GO:0017056 GO:0005829 GO:0034399 GO:0070208 GO:0071426 GO:0030159	NULL	Y
evm.model.scaffold11_size1489916.330	631	1	Uncharacterized protein	noGO	NULL	S
evm.model.scaffold11_size1489916.374	452	4	F-box/LRR-repeat protein At4g29420	GO:0009914 GO:0009506 GO:0009736 GO:0005515	NULL	S
evm.model.scaffold11_size1489916.144	151	1	hypothetical protein	noGO	NULL	S
evm.model.scaffold11_size1489916.66	440	1	serine/threonine-protein phosphatase 7 long form homolog	noGO	NULL	S
evm.model.scaffold11_size1489916.286	577	1	F-box/LRR-repeat protein 13	GO:0019005 GO:0004842 GO:0005515 GO:0016567 GO:0031146	NULL	S
evm.model.scaffold11_size1489916.362	560	4	transmembrane E3 ubiquitin-protein ligase 1-like	GO:0009827 GO:0048363 GO:0008270 GO:0043161 GO:0061630 GO:0000209 GO:0080001 GO:0016021 GO:0012505 GO:0016874	NULL	O
evm.model.scaffold11_size1489916.233	209	1	Uncharacterized protein (Fragment)	noGO	NULL	S
evm.model.scaffold11_size1489916.209	140	1	hypothetical protein	noGO	NULL	S
evm.model.scaffold11_size1489916.7	442	4	Alcohol dehydrogenase 1B-like	GO:0008270 GO:0016491 GO:0050897 GO:0010033 GO:0055114	NULL	Q
evm.model.scaffold11_size1489916.373	122	4	Mitochondrial ATP synthase subunit G protein	GO:0000276 GO:0003743 GO:0003746 GO:0015078 GO:0006413 GO:0006414 GO:0015986	NULL	S
evm.model.scaffold11_size1489916.68	182	Singleton	putative invertase inhibitor	GO:0005576 GO:0004857 GO:0043086	NULL	S
evm.model.scaffold11_size1489916.27	122	1	Uncharacterized protein	noGO	NULL	L
evm.model.scaffold11_size1489916.303	677	2	Polyprenol reductase 2	GO:0003865 GO:0016093 GO:0016020 GO:0055114 GO:0006488	3-oxo-5-alpha-steroid_4-dehydrogenase_(acceptor)	I
evm.model.scaffold11_size1489916.342	479	1	Protein aspartic protease in guard cell 1	GO:0004190 GO:0006508 GO:0030163	Acting_on_peptide_bonds_(peptidases)	O
evm.model.scaffold11_size1489916.372	506	4	SNF2 domain protein	noGO	NULL	none
evm.model.scaffold11_size1489916.235	114	1	Regulator of rDNA transcription protein 15	GO:0005488 GO:0016740 GO:0034645	NULL	none
evm.model.scaffold11_size1489916.309	271	1	Acylamino-acid-releasing enzyme	noGO	NULL	none
evm.model.scaffold11_size1489916.62	435	1	[fructose-bisphosphate aldolase]-lysine n-methyltransferase, chloroplastic	GO:0005515 GO:0016279 GO:0018026	NULL	S
evm.model.scaffold11_size1489916.198	528	1	Cytokinin hydroxylase	GO:0009506 GO:0005506 GO:0016705 GO:0050616 GO:0033466 GO:0055114 GO:0004497 GO:0020037	Acting_on_the_CH-CH_group_of_donors	IQ
evm.model.scaffold11_size1489916.1	3085	1	serine/threonine-protein kinase SMG1-like	GO:0006281 GO:2001020 GO:0046854 GO:0046777 GO:0004674 GO:0005654 GO:0000166 GO:0006406 GO:0000184 GO:0016491 GO:0042162 GO:0005829 GO:0055114 GO:0018105 GO:0032204	Transferring_phosphorus-containing_groups	L
evm.model.scaffold11_size1489916.369	528	4	Uncharacterized protein	GO:0016021	NULL	S
evm.model.scaffold11_size1489916.257	572	1	hypothetical protein	noGO	NULL	S
evm.model.scaffold11_size1489916.361	359	4	2-oxoisovalerate dehydrogenase subunit beta 1, mitochondrial-like	GO:0003863 GO:0043617 GO:0009083 GO:0003826 GO:0007584 GO:0055114 GO:0009646 GO:0009744	3-methyl-2-oxobutanoate_dehydrogenase_(2-methylpropanoyl-transferring)	C
evm.model.scaffold11_size1489916.371	204	4	Putative RING finger protein-like	noGO	NULL	S
evm.model.scaffold11_size1489916.163	157	1	Serine/threonine-protein phosphatase 7 long form-like	noGO	NULL	S
evm.model.scaffold11_size1489916.255	352	1	NAC domain-containing protein 35	GO:0003677 GO:0003700 GO:0006355	NULL	K
evm.model.scaffold11_size1489916.364	232	4	transmembrane emp24 domain-containing protein p24beta2-like	GO:0005789 GO:0016021 GO:0016760 GO:0030244 GO:0071555	Cellulose_synthase_(UDP-forming)	U
evm.model.scaffold1202_size12764.3	108	1	Heat shock protein DnaJ, cysteine-rich domain containing protein	GO:0009507	NULL	none
evm.model.scaffold1202_size12764.2	69	1	Potato type II proteinase inhibitor family protein	GO:0004867	NULL	S
evm.model.scaffold1203_size12743.2	293	1	Coatomer subunit epsilon	GO:0006888 GO:0005515 GO:0006890 GO:0015031 GO:0005198 GO:0005829 GO:0000139 GO:0006891 GO:0005774 GO:0030126	NULL	U
evm.model.scaffold1203_size12743.1	814	1	delta(24)-sterol reductase	GO:0071949 GO:0009826 GO:0005516 GO:0009808 GO:0016021 GO:0016132 GO:0050614 GO:0055114 GO:0005774 GO:0009834 GO:0005886	Delta(24)-sterol_reductase	C
evm.model.scaffold1205_size12494.1	452	1	Beta-glucuronosyltransferase glcat14b	GO:0009826 GO:0048681 GO:0008375 GO:0015020 GO:0070555 GO:0016021 GO:0000139 GO:0030166 GO:0098791	Glucuronosyltransferase	G
evm.model.scaffold1205_size12494.4	690	1	paired amphipathic helix protein Sin3-like 2 isoform X2	GO:0003714 GO:0005506 GO:0016705 GO:0031418 GO:0006355 GO:0055114 GO:1903507	NULL	B
evm.model.scaffold1205_size12494.3	603	1	inactive LRR receptor-like serine/threonine-protein kinase BIR2	GO:0005524 GO:0009507 GO:1900150 GO:0016021 GO:0046777 GO:1900425 GO:0004674 GO:0005886	Transferring_phosphorus-containing_groups	T
evm.model.scaffold1206_size12357.2	1591	1	sister chromatid cohesion protein PDS5 homolog B isoform X2	GO:0016020 GO:0043231 GO:0044444 GO:0007064	NULL	D
evm.model.scaffold1207_size12337.1	497	1	O-acyltransferase WSD1-like isoform X1	GO:0047196 GO:0019432 GO:0004144 GO:0005886 GO:0010025	Diacylglycerol_O-acyltransferase;Long-chain-alcohol_O-fatty-acyltransferase	S
evm.model.scaffold1208_size12265.5	220	1	NTF2-like domain containing protein	noGO	NULL	S
evm.model.scaffold1208_size12265.6	132	1	Auxin responsive SAUR protein	GO:0009733	NULL	S
evm.model.scaffold1209_size12254.2	397	4	Putative ovule protein	noGO	NULL	none
evm.model.scaffold1209_size12254.1	748	4	ABC transporter A family member 2	GO:0015245 GO:1905039 GO:1902358 GO:0048316 GO:0005524 GO:0015908 GO:0015709 GO:0043492 GO:0043231 GO:0016021 GO:0015419 GO:0102025 GO:0015405	Adenosinetriphosphatase;Acting_on_acid_anhydrides;ABC-type_sulfate_transporter;Nucleoside-triphosphate_phosphatase	I
evm.model.scaffold120_size617610.82	315	Singleton	Phosphoglycerate kinase	noGO	NULL	none
evm.model.scaffold120_size617610.98	440	1	Floral homeotic protein apetala 2	GO:0003677 GO:0003700 GO:0010093 GO:0010073 GO:0048316 GO:0006355 GO:0048481	NULL	K
evm.model.scaffold120_size617610.54	794	4	G2/mitotic-specific cyclin S13-7-like	noGO	NULL	D
evm.model.scaffold120_size617610.30	177	1	Basic leucine zipper 43	GO:0003700 GO:0006355	NULL	K
evm.model.scaffold120_size617610.90	506	1	Dicarboxylate transporter 2.1, chloroplastic-like	GO:0042910 GO:0015131 GO:0009534 GO:0015140 GO:1902356 GO:0009624 GO:0005313 GO:0009706 GO:0006814 GO:0016021 GO:0019676 GO:0015813 GO:0071423	NULL	P
evm.model.scaffold120_size617610.129	451	4	Non-specific serine/threonine protein kinase	GO:0005524 GO:0009737 GO:0009651 GO:0005737 GO:0004674 GO:0018105 GO:0035556 GO:0005886 GO:0018107	Transferring_phosphorus-containing_groups	T
evm.model.scaffold120_size617610.84	89	1	hypothetical protein	noGO	NULL	S
evm.model.scaffold120_size617610.4	235	4	Putative thaumatin	noGO	NULL	O
evm.model.scaffold120_size617610.116	525	1	protein indeterminate-domain 5, chloroplastic-like	GO:0003700 GO:0008356 GO:0006355 GO:0003676	NULL	S
evm.model.scaffold120_size617610.106	127	Singleton	BnaC09g40680D protein	noGO	NULL	S
evm.model.scaffold120_size617610.115	774	1	Katanin p80 WD40 repeat-containing subunit B1 homolog	GO:0080008 GO:0051013 GO:0008352 GO:0016740 GO:0007019 GO:0008568 GO:0008017	Adenosinetriphosphatase;Nucleoside-triphosphate_phosphatase;Acting_on_acid_anhydrides	Z
evm.model.scaffold120_size617610.47	337	1	signal peptide peptidase-like	GO:0042803 GO:1904211 GO:0009555 GO:0005791 GO:0006465 GO:0009846 GO:0042500 GO:0005765 GO:0031625 GO:0051289 GO:0030660 GO:0071556 GO:0071458 GO:0036513 GO:0098827	Acting_on_peptide_bonds_(peptidases)	S
evm.model.scaffold120_size617610.53	907	1	Protein argonaute 4-like	GO:0035198 GO:0090502 GO:0070919 GO:1904159 GO:0035197 GO:0080188 GO:0015030 GO:0003682 GO:0005730 GO:0006413 GO:0004521 GO:0009816 GO:0003743 GO:0005515 GO:0005737 GO:0010529 GO:0051607 GO:0071359 GO:0005719 GO:0019048 GO:0048481 GO:0030422 GO:0051567	NULL	J
evm.model.scaffold120_size617610.75	179	Singleton	Translation initiation factor IF-2 like	noGO	NULL	none
evm.model.scaffold120_size617610.103	1642	Singleton	Actin cytoskeleton-regulatory complex protein	GO:0000421 GO:0005886 GO:0030126 GO:0005198 GO:0005515 GO:0000045 GO:0006886 GO:0009555 GO:0016192	NULL	S
evm.model.scaffold120_size617610.17	485	1	uncharacterized transporter YBR287W-like isoform X1	GO:0005789 GO:0055085 GO:0022857 GO:0016021 GO:0098827 GO:0009733	NULL	L
evm.model.scaffold120_size617610.107	697	Singleton	FG-GAP repeat-containing protein	GO:0005774 GO:0016021 GO:0009826	NULL	none
evm.model.scaffold120_size617610.91	661	1	mechanosensitive ion channel protein 2, chloroplastic-like	GO:0010020 GO:0009507 GO:0009526 GO:0016020 GO:0055085	NULL	M
evm.model.scaffold120_size617610.77	811	4	cell division cycle protein 48 homolog	GO:0005829 GO:0045732 GO:0046686 GO:0005730 GO:0005886 GO:0005654 GO:0005524 GO:0016787 GO:0007049 GO:0051301	NULL	O
evm.model.scaffold120_size617610.86	436	1	Cyclin-dependent kinase c-2	GO:0032968 GO:0070816 GO:0005524 GO:0000790 GO:0008353 GO:0000307 GO:0051726 GO:0004693	Transferring_phosphorus-containing_groups;[RNA-polymerase]-subunit_kinase;Cyclin-dependent_kinase	T
evm.model.scaffold120_size617610.102	215	1	BnaCnng39980D protein	noGO	NULL	S
evm.model.scaffold120_size617610.109	1044	1	Putative microtubule-associated protein futsch-like	noGO	NULL	none
evm.model.scaffold120_size617610.88	809	1	tRNA (Cytosine(34)-C(5))-methyltransferase-like isoform X1	GO:0016428 GO:0005737 GO:0030488 GO:0000049	NULL	J
evm.model.scaffold120_size617610.157	174	1	Uncharacterized protein	noGO	NULL	L
evm.model.scaffold120_size617610.46	478	1	Homeobox-ddt domain protein rlt1	GO:0003677	NULL	K
evm.model.scaffold120_size617610.64	232	1	V-type proton ATPase subunit E	GO:0042626 GO:0009651 GO:0009793 GO:0007030 GO:1902600 GO:0022853 GO:0008553 GO:0046961 GO:0042742 GO:0009735 GO:0042788 GO:0009409 GO:0003735 GO:0043492 GO:0033178 GO:0015405	Adenosinetriphosphatase;P-type_H(+)-exporting_transporter;Nucleoside-triphosphate_phosphatase	C
evm.model.scaffold120_size617610.135	124	1	Uncharacterized protein	noGO	NULL	L
evm.model.scaffold120_size617610.59	537	4	ETHYLENE INSENSITIVE 3-like 1 protein	GO:0003700 GO:0001666 GO:0010182 GO:0000976 GO:0006355 GO:0009873 GO:0071281 GO:0042742	NULL	S
evm.model.scaffold120_size617610.66	225	1	Senescence regulator	noGO	NULL	S
evm.model.scaffold120_size617610.79	751	1	YrdC domain-containing protein mitochondrial isoform X1	GO:0003725	NULL	S
evm.model.scaffold120_size617610.68	204	4	hypothetical protein	noGO	NULL	S
evm.model.scaffold120_size617610.29	618	1	Protein NSP-INTERACTING KINASE 1-like	GO:0040015 GO:0032440 GO:0046777 GO:0007178 GO:0005886 GO:0004675 GO:0005654 GO:0005524 GO:0005515 GO:0005737 GO:0016021 GO:0051607 GO:0055114 GO:0034504	Transferring_phosphorus-containing_groups;2-alkenal_reductase_(NAD(P)(+))	T
evm.model.scaffold120_size617610.78	220	1	classical arabinogalactan protein 1-like	GO:0016021	NULL	S
evm.model.scaffold120_size617610.32	243	4	myb-related protein 308	GO:0003677 GO:0001101 GO:0009725 GO:0031327 GO:0090379 GO:1901700 GO:2000762	NULL	ADK
evm.model.scaffold120_size617610.153	123	1	hypothetical protein	noGO	NULL	S
evm.model.scaffold120_size617610.100	727	4	Zeaxanthin epoxidase, chloroplastic	GO:0071949 GO:0009540 GO:0010182 GO:0009688 GO:0009414 GO:0009535 GO:0009408 GO:0005515 GO:0052662 GO:0050891 GO:0031969 GO:0044550 GO:0016021 GO:0055114 GO:0016123 GO:0010114	Acting_on_paired_donors,_with_incorporation_or_reduction_of_molecular_oxygen._The_oxygen_incorporated_need_not_be_derived_from_O(2);Acting_on_paired_donors,_with_incorporation_or_reduction_of_molecular_oxygen._The_oxygen_incorporated_need_not_be_derived_from_O(2)	C
evm.model.scaffold120_size617610.142	717	1	Serine/threonine-protein phosphatase 6 regulatory subunit 3	GO:0005774 GO:0019903 GO:0043666	NULL	D
evm.model.scaffold120_size617610.58	765	4	Serrate RNA effector molecule	GO:0048509 GO:0031053 GO:0016607 GO:0006355 GO:0005730 GO:0003677 GO:0003700 GO:0005846 GO:0009507 GO:0048367 GO:0000381 GO:0005829 GO:0071359 GO:0010445 GO:2000011 GO:0010267	NULL	A
evm.model.scaffold120_size617610.141	845	1	homeobox-leucine zipper protein ATHB-14-like isoform X1	GO:0080060 GO:0003677 GO:0003700 GO:0009880 GO:0010072 GO:0006355 GO:0008289 GO:0009944 GO:0009855	NULL	K
evm.model.scaffold120_size617610.113	278	1	Putative ovule protein	GO:0003677	NULL	S
evm.model.scaffold120_size617610.131	317	4	Beta-lactamase-like protein	noGO	NULL	S
evm.model.scaffold120_size617610.14	411	4	S-adenosyl-L-methionine-dependent methyltransferases superfamily protein	GO:0005802 GO:0016021 GO:0008757 GO:0032259	NULL	S
evm.model.scaffold120_size617610.62	945	1	receptor-like kinase TMK3	GO:0005524 GO:0016021 GO:0007178 GO:0005576 GO:0006468 GO:0005886 GO:0004675	Transferring_phosphorus-containing_groups	T
evm.model.scaffold120_size617610.31	159	4	30S ribosomal protein 3, chloroplastic	GO:0009570 GO:0003735 GO:0005840 GO:0032544 GO:0009535	NULL	J
evm.model.scaffold120_size617610.97	571	1	Polyphenol oxidase	GO:0046872 GO:0004097 GO:0009543 GO:0055114 GO:0046148	Acting_on_diphenols_and_related_substances_as_donors;Catechol_oxidase	Q
evm.model.scaffold120_size617610.8	386	3	Serine/threonine-protein phosphatase 7 long form-like	GO:0005488	NULL	S
[truncated: 26,164 more rows]

## Sheet: Ugibba SHARED with Urenif
gene_name	length	status	product	GOterms	EC_name	NOG_class
evm.model.Ug_unitig_0.1	3729	Singleton	transformation/transcription domain-associated protein-like	GO:0006281 GO:0005524 GO:0005515 GO:0035267 GO:0003712 GO:0006355 GO:0016573 GO:0004674 GO:0006468 GO:0000124	Transferring_phosphorus-containing_groups	BDLT
evm.model.Ug_unitig_0.10	1899	Dispersed	callose synthase 5	GO:0003843 GO:0030170 GO:0006075 GO:0016021 GO:0085029 GO:0009846 GO:0000148 GO:0080092	1,3-beta-glucan_synthase	M
evm.model.Ug_unitig_0.1000	767	Dispersed	Adp-ribosylation factor gtpase-activating protein agd3	GO:0030139 GO:0005515 GO:0007010 GO:0046872 GO:0035618 GO:0005096 GO:0048768 GO:0043547 GO:0005886	NULL	T
evm.model.Ug_unitig_0.1002	1382	Dispersed	ARF guanine-nucleotide exchange factor GNL2	GO:0005086 GO:0006298 GO:0009846 GO:0065009 GO:0005524 GO:0005802 GO:0016192 GO:0016020 GO:0005829 GO:0032012 GO:0030983 GO:0090406 GO:0016787	NULL	U
evm.model.Ug_unitig_0.1004	417	Dispersed	ATPase, AAA-type, core	GO:0009570 GO:0005524 GO:0043085 GO:0046863 GO:0009535 GO:0016787	NULL	O
evm.model.Ug_unitig_0.1006	542	Singleton	DNA polymerase epsilon subunit	GO:0003677 GO:0070182 GO:0003887 GO:0051781 GO:0009793 GO:0006261 GO:0042276 GO:0008622	DNA-directed_DNA_polymerase	L
evm.model.Ug_unitig_0.1007	892	Dispersed	respiratory burst oxidase homolog protein C	GO:0004601 GO:0005509 GO:0016174 GO:0016021 GO:0098869 GO:0055114	NAD(P)H_oxidase_(H(2)O(2)-forming);Peroxidase	PQ
evm.model.Ug_unitig_0.1008	499	Dispersed	calcium-binding mitochondrial carrier protein SCaMC-1-like	GO:0042910 GO:1901679 GO:0005347 GO:0005743 GO:0006855 GO:0006839 GO:0098656 GO:0071277 GO:0005509 GO:0010941 GO:0016021 GO:0034599 GO:0015867 GO:0015866 GO:0015217	NULL	C
evm.model.Ug_unitig_0.1011	317	Segmental	LEAFY-like protein	GO:0031490 GO:0003700 GO:0010077 GO:0010582 GO:0042803 GO:0030154 GO:0006355 GO:0043565 GO:0009740 GO:0043621	NULL	K
evm.model.Ug_unitig_0.1012	152	Segmental	Chaperone protein dnaj 8, chloroplastic	GO:0009570 GO:0016021 GO:0009416	NULL	O
evm.model.Ug_unitig_0.1013	397	Dispersed	probable N-acetyltransferase HLS1	GO:0016747	NULL	S
evm.model.Ug_unitig_0.1016	378	Singleton	Phospholipase-like protein	noGO	NULL	D
evm.model.Ug_unitig_0.1019	192	Dispersed	Zinc finger protein 1	GO:0003700 GO:0044212 GO:0006355 GO:0009788	NULL	S
evm.model.Ug_unitig_0.1020	231	Dispersed	Mitochondrial glycoprotein	GO:0005759	NULL	C
evm.model.Ug_unitig_0.1023	424	Dispersed	COBW domain-containing protein 1-like	noGO	NULL	H
evm.model.Ug_unitig_0.1024	489	Segmental	Protein YIPF	GO:0016192 GO:0006351 GO:0016021 GO:0043565 GO:0017137	NULL	S
evm.model.Ug_unitig_0.1026	378	Singleton	Snf1-related protein kinase regulatory subunit gamma-like pv42a	GO:0010183 GO:0048443 GO:0009555 GO:0009553 GO:0016301 GO:0016310	NULL	C
evm.model.Ug_unitig_0.1027	305	Dispersed	Glucan endo-1,3-beta-glucosidase 14	GO:0005975 GO:0007154 GO:0016021 GO:0042973 GO:0001871 GO:0046658 GO:0030247	Beta-glucosidase;Glucan_endo-1,3-beta-D-glucosidase	G
evm.model.Ug_unitig_0.1028	196	Dispersed	glucan endo-1,3-beta-glucosidase 14-like	GO:0005975 GO:0007154 GO:0016021 GO:0042973 GO:0001871 GO:0046658 GO:0030247	Beta-glucosidase;Glucan_endo-1,3-beta-D-glucosidase	G
evm.model.Ug_unitig_0.1029	176	Segmental	EPIDERMAL PATTERNING FACTOR-like protein 8	GO:0016020	NULL	S
evm.model.Ug_unitig_0.1030	202	Segmental	Ethylene-responsive transcription factor WIN1	GO:0010143 GO:0003700 GO:0006355 GO:0009873 GO:0043565 GO:0010166 GO:0009414	NULL	K
evm.model.Ug_unitig_0.1031	435	Dispersed	GDP-fucose protein O-fucosyltransferase	GO:0005737 GO:0016757 GO:0006004	NULL	G
evm.model.Ug_unitig_0.1032	171	Segmental	Putative lactoylglutathione lyase / glyoxalase I family protein	GO:0016740 GO:0016829	NULL	S
evm.model.Ug_unitig_0.1036	666	Dispersed	periodic tryptophan protein 2 homolog	GO:0000462 GO:0032040 GO:0005515 GO:0030515 GO:0010119 GO:0009553 GO:0034388 GO:0000028 GO:0080008 GO:0009744 GO:0016787	NULL	A
evm.model.Ug_unitig_0.1039	318	Segmental	Gibberellin 3-beta-dioxygenase 1	GO:0005737 GO:0016707 GO:0009686 GO:0055114 GO:0009740 GO:0010114	Gibberellin_3-beta-dioxygenase;Acting_on_paired_donors,_with_incorporation_or_reduction_of_molecular_oxygen._The_oxygen_incorporated_need_not_be_derived_from_O(2)	Q
evm.model.Ug_unitig_0.1040	518	Segmental	Katanin p60 ATPase-containing subunit A1	GO:0005524 GO:0051013 GO:0009825 GO:0005737 GO:0043622 GO:0008568 GO:0005874 GO:0016853 GO:0008017	Adenosinetriphosphatase;Nucleoside-triphosphate_phosphatase;Acting_on_acid_anhydrides	O
evm.model.Ug_unitig_0.1041	551	Singleton	putative uridine kinase C227.14 isoform X1	GO:0005524 GO:0006206 GO:0009507 GO:0003899 GO:0043097 GO:0006351 GO:0046132 GO:0004849 GO:0006222 GO:0004594 GO:0016310	Uridine_kinase;DNA-directed_RNA_polymerase;Pantothenate_kinase	FH
evm.model.Ug_unitig_0.1042	295	Dispersed	beta-carotene isomerase D27, chloroplastic-like	GO:0009507 GO:0005506 GO:0016859 GO:1901601 GO:0010223	NULL	S
evm.model.Ug_unitig_0.1045	309	Dispersed	Protein indeterminate-domain 12	GO:0003676 GO:0003700 GO:0046872 GO:0006355	NULL	S
evm.model.Ug_unitig_0.1047	646	Segmental	Serine/threonine-protein kinase Nek2	GO:0005524 GO:0006468 GO:0004674	Transferring_phosphorus-containing_groups	T
evm.model.Ug_unitig_0.1048	362	Dispersed	RNase H family protein, putative isoform 2	GO:0003676 GO:0004523 GO:0090502	Acting_on_ester_bonds;Acting_on_ester_bonds;Ribonuclease_H	L
evm.model.Ug_unitig_0.1049	730	Dispersed	Methylcrotonoyl-CoA carboxylase subunit alpha, mitochondrial (Fragment)	GO:0005524 GO:0009507 GO:0005759 GO:0006552 GO:0016021 GO:0004672 GO:0004485 GO:0006468 GO:0050897	Methylcrotonoyl-CoA_carboxylase	C
evm.model.Ug_unitig_0.1051	534	Segmental	cytochrome P450 86A22-like	GO:0005506 GO:0070330 GO:0016021 GO:0016709 GO:0055114 GO:0018685 GO:0035336 GO:0006631 GO:0020037	Alkane_1-monooxygenase;Unspecific_monooxygenase;Acting_on_paired_donors,_with_incorporation_or_reduction_of_molecular_oxygen._The_oxygen_incorporated_need_not_be_derived_from_O(2);Acting_on_paired_donors,_with_incorporation_or_reduction_of_molecular_oxygen._The_oxygen_incorporated_need_not_be_derived_from_O(2);Acting_on_paired_donors,_with_incorporation_or_reduction_of_molecular_oxygen._The_oxyge…	Q
evm.model.Ug_unitig_0.1052	268	Singleton	Fatty-acid-binding protein 1	GO:0009570 GO:0005504 GO:0016020 GO:0009941 GO:0016872 GO:0006631	NULL	S
evm.model.Ug_unitig_0.1053	1895	Segmental	puromycin-sensitive aminopeptidase isoform X1	GO:0005525 GO:0008270 GO:0042802 GO:0043171 GO:0005737 GO:0006508 GO:0070006 GO:0046983 GO:0042277 GO:0005886	Acting_on_peptide_bonds_(peptidases)	EO
evm.model.Ug_unitig_0.1054	782	Dispersed	cation/H(+) antiporter 18-like	GO:0015299 GO:1902600 GO:0005770 GO:0016021 GO:0006623 GO:0006885	NULL	P
evm.model.Ug_unitig_0.1055	223	Singleton	alpha-ketoglutarate-dependent dioxygenase alkB homolog 6 isoform X1	GO:0016491 GO:0055114	NULL	S
evm.model.Ug_unitig_0.1056	452	Segmental	V-type proton ATPase subunit H	GO:0042626 GO:1902600 GO:0022853 GO:0008553 GO:0046961 GO:0007035 GO:0005886 GO:0020037 GO:0000221 GO:0009507 GO:0005515 GO:0043492 GO:0015405	Adenosinetriphosphatase;P-type_H(+)-exporting_transporter;Nucleoside-triphosphate_phosphatase	C
evm.model.Ug_unitig_0.1057	510	Dispersed	cytochrome P450 CYP736A12-like	GO:0005789 GO:0044550 GO:0098827 GO:0009733 GO:0005506 GO:0016709 GO:0055114 GO:0020037	Acting_on_paired_donors,_with_incorporation_or_reduction_of_molecular_oxygen._The_oxygen_incorporated_need_not_be_derived_from_O(2)	Q
evm.model.Ug_unitig_0.1060	434	Segmental	probable protein phosphatase 2C 33	GO:0004724 GO:0006470 GO:0005886	Protein-serine/threonine_phosphatase	T
evm.model.Ug_unitig_0.1062	230	Dispersed	Nucleoside diphosphate kinase	GO:0000166 GO:0004550 GO:0009209 GO:0009220 GO:0016310	Nucleoside-diphosphate_kinase	S
evm.model.Ug_unitig_0.1063	335	Singleton	Pilus biogenesis/stability type IV	GO:0009570 GO:0005515 GO:0010207 GO:0031969 GO:0009644 GO:0009611 GO:0035448 GO:0010206 GO:0009535	NULL	none
evm.model.Ug_unitig_0.1064	260	Singleton	PRA1 family protein	GO:0016192 GO:0016020	NULL	P
evm.model.Ug_unitig_0.1068	1207	Dispersed	Ubiquitin carboxyl-terminal hydrolase 5	GO:0016579 GO:0004843 GO:0016021 GO:0006511	Ubiquitinyl_hydrolase_1	O
evm.model.Ug_unitig_0.1069	935	Segmental	Smr domain-containing protein	GO:0005515	NULL	L
evm.model.Ug_unitig_0.1070	184	Dispersed	trafficking protein particle complex subunit 1-like	GO:0030008 GO:0006888 GO:0009555 GO:0005829 GO:0017112 GO:0009933 GO:0065009	NULL	U
evm.model.Ug_unitig_0.1071	163	Singleton	probable NADH dehydrogenase [ubiquinone] 1 alpha subcomplex subunit 5, mitochondrial	GO:0005747 GO:0009507 GO:0022904 GO:0008137	NADH:ubiquinone_reductase_(H(+)-translocating);Acting_on_NADH_or_NADPH;NADH_dehydrogenase	C
evm.model.Ug_unitig_0.1072	648	Segmental	probable methyltransferase PMT15	GO:0016021 GO:0008168 GO:0032259	NULL	S
evm.model.Ug_unitig_0.1074	682	Segmental	probable transcriptional regulator SLK2 isoform X2	GO:0010272 GO:0010044 GO:0009793 GO:1901001 GO:0046898 GO:0009620 GO:0006974 GO:0009624 GO:0009733 GO:0003677 GO:0006979 GO:0009617 GO:0001666 GO:0009909 GO:0046982 GO:0048481 GO:0071217 GO:0060090 GO:0044424 GO:0006357 GO:0045892	NULL	K
evm.model.Ug_unitig_0.1075	259	Segmental	BAG family molecular chaperone regulator 1-like	GO:0071629 GO:0005829 GO:0051087	NULL	T
evm.model.Ug_unitig_0.1076	224	Singleton	cysteine and histidine-rich domain-containing protein RAR1	GO:0009817 GO:0009816 GO:0008270 GO:0002679 GO:0005737 GO:0051879 GO:0017048 GO:0009626 GO:0050821	NULL	S
evm.model.Ug_unitig_0.1077	694	Dispersed	DEAD-box ATP-dependent RNA helicase	GO:0005524 GO:0003723 GO:0003724 GO:0070035 GO:0005737 GO:0017151 GO:0008186 GO:0010501 GO:0005730	Adenosinetriphosphatase;RNA_helicase;Nucleoside-triphosphate_phosphatase	A
evm.model.Ug_unitig_0.1078	879	Dispersed	Kinesin-like protein KIN-14I	GO:0090378 GO:0007097 GO:0005871 GO:0005884 GO:0043621 GO:0008569 GO:0008017 GO:0051015 GO:0005524 GO:0001578 GO:0031534 GO:0055028 GO:0051017	Adenosinetriphosphatase;Minus-end-directed_kinesin_ATPase;Nucleoside-triphosphate_phosphatase	Z
evm.model.Ug_unitig_0.1079	425	Singleton	Ubiquitinyl hydrolase 1	noGO	NULL	S
evm.model.Ug_unitig_0.1080	876	Dispersed	Sucrose synthase	GO:0010555 GO:0010431 GO:0016157 GO:0005982 GO:0005985 GO:0009414	Sucrose_synthase	M
evm.model.Ug_unitig_0.1081	166	Dispersed	Putative ovule protein	noGO	NULL	S
evm.model.Ug_unitig_0.1083	300	Dispersed	Blue-light photoreceptor phr2	GO:0003904 GO:0003914	Deoxyribodipyrimidine_photo-lyase;Carbon-carbon_lyases;(6-4)DNA_photolyase	LT
evm.model.Ug_unitig_0.1084	125	Segmental	Ribosomal protein L22e	GO:0009506 GO:0003735 GO:0002181 GO:0003729 GO:0005730 GO:0005886 GO:0042788	NULL	J
evm.model.Ug_unitig_0.1086	162	Segmental	universal stress protein A-like protein	GO:0016208 GO:0005886 GO:0016787	NULL	T
evm.model.Ug_unitig_0.1087	385	Singleton	WD repeat-containing protein 89 homolog	GO:0005515 GO:0010029 GO:0040008	NULL	S
evm.model.Ug_unitig_0.1088	165	Segmental	Alpha-crystallin, subunit A	GO:0009506 GO:0010449 GO:0010628 GO:0051087 GO:0051131 GO:0016021 GO:0005829 GO:2000012 GO:0080037 GO:0051879 GO:0006457 GO:0005886	NULL	O
evm.model.Ug_unitig_0.1089	928	Dispersed	DNA mismatch repair protein	GO:0016887 GO:0036464 GO:0090305 GO:0015630 GO:0006310 GO:0009555 GO:0048316 GO:0006298 GO:0005886 GO:0003697 GO:0005654 GO:0005524 GO:0004519 GO:0032389 GO:0005829 GO:0032138 GO:0016446	Adenosinetriphosphatase;Nucleoside-triphosphate_phosphatase	L
evm.model.Ug_unitig_0.1090	219	Dispersed	2-oxoglutarate (2OG) and Fe(II)-dependent oxygenase superfamily protein	GO:0008270 GO:0008198 GO:0016706 GO:0005829 GO:0055114 GO:0002098 GO:0030488 GO:0000049 GO:0016300	Acting_on_paired_donors,_with_incorporation_or_reduction_of_molecular_oxygen._The_oxygen_incorporated_need_not_be_derived_from_O(2)	L
evm.model.Ug_unitig_0.1091	188	Singleton	translocator protein homolog	GO:0005789 GO:0006778 GO:0009737 GO:0009651 GO:0031969 GO:0016021 GO:0000139 GO:0005795 GO:0098827 GO:0020037	NULL	S
evm.model.Ug_unitig_0.1092	393	Dispersed	LRR repeats and ubiquitin-like domain-containing protein At2g30105	GO:0005515	NULL	S
evm.model.Ug_unitig_0.1093	441	Singleton	Dol-P-Man:Man(5)GlcNAc(2)-PP-Dol alpha-1,3-mannosyltransferase	GO:0097502 GO:0006486 GO:0030176 GO:0052925	Dolichyl-P-Man:Man(5)GlcNAc(2)-PP-dolichol_alpha-1,3-mannosyltransferase	G
evm.model.Ug_unitig_0.1094	88	Singleton	hypothetical protein	noGO	NULL	S
evm.model.Ug_unitig_0.1095	1473	Segmental	MORC family CW-type zinc finger protein	GO:0008270	NULL	none
evm.model.Ug_unitig_0.1096	966	Dispersed	Peroxisome biogenesis protein 6	GO:0016887 GO:0005778 GO:0016558 GO:0005524 GO:0006635 GO:0005829	Adenosinetriphosphatase;Nucleoside-triphosphate_phosphatase	O
evm.model.Ug_unitig_0.1097	407	Dispersed	Peptide chain release factor apg3, chloroplastic	GO:0009507 GO:0006415 GO:0043022 GO:0010027 GO:0009658 GO:0032544 GO:0016149	NULL	J
evm.model.Ug_unitig_0.1098	296	Dispersed	hypothetical protein	noGO	NULL	S
evm.model.Ug_unitig_0.1099	886	Singleton	Nodulin homeobox like	GO:0060195 GO:0005730 GO:0003697	NULL	K
evm.model.Ug_unitig_0.11	559	Singleton	U3 small nucleolar ribonucleoprotein protein MPP10	GO:0034457 GO:0006364 GO:0005732	NULL	A
evm.model.Ug_unitig_0.1100	169	Singleton	SOSS complex subunit B homolog	GO:0000784 GO:0070876 GO:0003677 GO:0000724 GO:0007093 GO:0010212	NULL	S
evm.model.Ug_unitig_0.1101	265	Tandem	Putative plastid-lipid-associated protein 6, chloroplastic	GO:0031977 GO:0010193 GO:0009941 GO:0042742 GO:0009658 GO:0005886 GO:0009535	NULL	S
evm.model.Ug_unitig_0.1102	253	Tandem	Putative plastid-lipid-associated protein 6, chloroplastic	GO:0031977 GO:0010193 GO:0009941 GO:0042742 GO:0009658 GO:0005886 GO:0009535	NULL	S
evm.model.Ug_unitig_0.1104	429	Dispersed	receptor-like cytosolic serine/threonine-protein kinase RBK2 isoform X1	GO:0005524 GO:0005737 GO:0051020 GO:0007178 GO:0006468 GO:0005886 GO:0004675	Transferring_phosphorus-containing_groups	T
evm.model.Ug_unitig_0.1105	466	Dispersed	sugar transporter ERD6-like 7	GO:0005887 GO:0009507 GO:0032440 GO:0006829 GO:1902600 GO:0005351 GO:0046323 GO:0055114 GO:0005355	2-alkenal_reductase_(NAD(P)(+))	U
evm.model.Ug_unitig_0.1106	457	Dispersed	DNAse I-like superfamily protein	GO:0016787 GO:0006807 GO:0043170 GO:0044237 GO:0044238	NULL	S
evm.model.Ug_unitig_0.1107	190	Dispersed	methyl-CpG-binding domain-containing protein 4-like	GO:0008270 GO:0008327	NULL	BK
evm.model.Ug_unitig_0.1108	327	Singleton	exosome complex component RRP4 homolog	GO:0034475 GO:0043928 GO:0000467 GO:0005730 GO:0060149 GO:0005654 GO:0000177 GO:0000176 GO:0071051 GO:0003723 GO:0071035 GO:0071034 GO:0071038 GO:0071049 GO:0034427	NULL	A
evm.model.Ug_unitig_0.1112	420	Tandem	BTB/POZ and MATH domain-containing protein 2	GO:0071472 GO:0042631 GO:0005515	NULL	D
evm.model.Ug_unitig_0.1115	256	Dispersed	EID1-like F-box protein 3	GO:0009738 GO:0009651 GO:0010228 GO:0010029 GO:0009414	NULL	O
evm.model.Ug_unitig_0.1116	466	Dispersed	Glycosyltransferase	GO:0045926 GO:0009690 GO:0010380 GO:0010083 GO:0006486 GO:0048316 GO:0080036 GO:0009965 GO:0048439 GO:0016020 GO:0050502 GO:0010015 GO:0050404 GO:0050403	Zeatin_O-beta-D-xylosyltransferase;Trans-zeatin_O-beta-D-glucosyltransferase;Cis-zeatin_O-beta-D-glucosyltransferase	CG
evm.model.Ug_unitig_0.1117	591	Dispersed	5 exonuclease Apollo	GO:0003824 GO:0006259 GO:0006974	NULL	L
evm.model.Ug_unitig_0.1118	316	Segmental	Adenylate isopentenyltransferase	GO:0009691 GO:0052622 GO:0052381 GO:0009824 GO:0006400 GO:0052623 GO:0009536	Adenylate_dimethylallyltransferase_(AMP-dependent);tRNA_dimethylallyltransferase	J
evm.model.Ug_unitig_0.1119	710	Dispersed	Protein trichome birefringence-like 11	GO:0016021 GO:0003824 GO:0009058	NULL	S
evm.model.Ug_unitig_0.112	134	Tandem	Seed maturation protein	noGO	NULL	S
evm.model.Ug_unitig_0.1120	140	Dispersed	Vesicle transport protein GOT1 isoform A	GO:0016021 GO:0016192	NULL	P
evm.model.Ug_unitig_0.1121	195	Dispersed	protein YLS3-like	GO:0008289 GO:0006869	NULL	S
evm.model.Ug_unitig_0.1122	404	Singleton	GTP cyclohydrolase 1	GO:0005525 GO:0006979 GO:0008270 GO:0042803 GO:0006729 GO:0005737 GO:0003934 GO:0016020 GO:0035998 GO:0046654 GO:0008277	GTP_cyclohydrolase_I	H
evm.model.Ug_unitig_0.1123	656	Dispersed	Receptor-like kinase tmk4	GO:0005524 GO:0005515 GO:0006468 GO:0005886 GO:0004675	Transferring_phosphorus-containing_groups	T
evm.model.Ug_unitig_0.1126	147	Singleton	Glyoxalase-like domain protein	GO:0005829	NULL	S
evm.model.Ug_unitig_0.1127	141	Dispersed	Pathogenic type III effector avirulence factor Avr cleavage site	noGO	NULL	none
evm.model.Ug_unitig_0.1128	175	Segmental	60S ribosomal protein L32-1	GO:0003735 GO:0005730 GO:0042788 GO:0006412	NULL	J
evm.model.Ug_unitig_0.1129	593	Dispersed	poly(A)-specific ribonuclease PARN-like isoform X1	GO:0043169 GO:0003676 GO:0003824	NULL	L
evm.model.Ug_unitig_0.113	207	Singleton	AT4G02715 protein	noGO	NULL	S
evm.model.Ug_unitig_0.1130	528	Segmental	MLO-like protein	GO:0009607 GO:0005516 GO:0016021 GO:0006952 GO:0005886	NULL	I
evm.model.Ug_unitig_0.1131	181	Proximal	60S ribosomal protein L32-1	GO:0003735 GO:0005730 GO:0042788 GO:0006412	NULL	J
evm.model.Ug_unitig_0.1132	190	Dispersed	BnaC05g44450D protein	GO:0016021	NULL	none
evm.model.Ug_unitig_0.1133	491	Segmental	probable serine/threonine-protein kinase At5g41260	GO:0005524 GO:0009506 GO:0005515 GO:0009742 GO:0007178 GO:0006468 GO:0005886 GO:0004675	Transferring_phosphorus-containing_groups	T
evm.model.Ug_unitig_0.1134	537	Segmental	Polygalacturonase non-catalytic subunit like (Fragment)	noGO	NULL	S
evm.model.Ug_unitig_0.1135	129	Tandem	Elicitor-responsive protein 3	GO:0005737 GO:0016020	NULL	S
evm.model.Ug_unitig_0.1137	690	Segmental	subtilisin-like protease SBT1.7	GO:0006508 GO:0004252	Acting_on_peptide_bonds_(peptidases)	G
evm.model.Ug_unitig_0.1139	398	Singleton	Putative transaldolase-like	GO:0009570 GO:0009052 GO:0005975 GO:0008270 GO:0004801 GO:0009941 GO:0004575	Alpha-glucosidase;Transaldolase;Beta-fructofuranosidase;Sucrose_alpha-glucosidase	G
evm.model.Ug_unitig_0.114	312	Dispersed	protein MARD1	GO:0010162 GO:0010494 GO:0009737 GO:0000932	NULL	S
evm.model.Ug_unitig_0.1140	259	Segmental	Poly(ADP-ribose) polymerase, catalytic domain containing protein	noGO	NULL	S
evm.model.Ug_unitig_0.1143	262	Segmental	probable aquaporin TIP3-2	GO:0005887 GO:0006833 GO:0006914 GO:0034220 GO:0042807 GO:0015250 GO:0032586 GO:0000326 GO:0010431	NULL	P
evm.model.Ug_unitig_0.1144	187	Singleton	Uncharacterized protein	noGO	NULL	none
evm.model.Ug_unitig_0.1145	1401	Singleton	nuclear pore complex protein NUP214 isoform X2	noGO	NULL	S
evm.model.Ug_unitig_0.1147	373	Dispersed	Aspartic proteinase nepenthesin-1	GO:0004190 GO:0006508	Acting_on_peptide_bonds_(peptidases)	O
evm.model.Ug_unitig_0.1148	321	Dispersed	Transcription factor myb46	GO:0000989 GO:0000988 GO:0044212 GO:0043565 GO:0009751 GO:1901348 GO:0000981 GO:0001135 GO:0006357 GO:0001076 GO:0045893 GO:0030154 GO:0050832	NULL	ADK
evm.model.Ug_unitig_0.1149	1129	Dispersed	SNF2 domain-containing protein CLASSY 4-like	GO:0005524	NULL	L
evm.model.Ug_unitig_0.1150	413	Segmental	nuclear transcription factor Y subunit C-1-like	GO:0003700 GO:0046982 GO:0006355	NULL	K
evm.model.Ug_unitig_0.1151	542	Dispersed	CBS domain-containing protein	GO:0016021 GO:0005515	NULL	S
evm.model.Ug_unitig_0.1152	358	Segmental	heavy metal-associated isoprenylated plant protein 3-like	GO:0046916 GO:0046914 GO:0005737 GO:0030001 GO:0005886	NULL	P
evm.model.Ug_unitig_0.1155	1005	Dispersed	Pseudouridine synthase	GO:0003723 GO:0005829 GO:0009982 GO:0000455 GO:0016798	NULL	A
evm.model.Ug_unitig_0.1157	76	Singleton	mitochondrial import inner membrane translocase subunit TIM8	GO:0005758 GO:0046872 GO:0072321	NULL	U
evm.model.Ug_unitig_0.1159	624	Segmental	Protein FAM214A like	noGO	NULL	S
evm.model.Ug_unitig_0.116	757	Singleton	Uncharacterized protein	noGO	NULL	S
evm.model.Ug_unitig_0.1160	548	Dispersed	UPF0503 protein At3g09070, chloroplastic-like	noGO	NULL	S
evm.model.Ug_unitig_0.1161	688	Dispersed	Ferric reduction oxidase 2-like	GO:0009617 GO:0000293 GO:0033214 GO:0016021 GO:0055114 GO:0005886	Oxidizing_metal_ions;Ferric-chelate_reductase_(NADH)	PQ
evm.model.Ug_unitig_0.1162	134	Singleton	DUF3245 domain-containing protein	noGO	NULL	S
evm.model.Ug_unitig_0.1164	2164	Segmental	Mediator of rna polymerase ii transcription subunit 12	GO:0003712 GO:0040034 GO:0090213 GO:0016592 GO:0016020 GO:0006367 GO:0006357	NULL	K
evm.model.Ug_unitig_0.1165	504	Segmental	Rop guanine nucleotide exchange factor 2	GO:0009817 GO:0005737 GO:0048767 GO:0005089 GO:0009531 GO:0005886 GO:0065009	NULL	G
evm.model.Ug_unitig_0.1166	184	Dispersed	elicitor-responsive protein 3	GO:0016020	NULL	S
evm.model.Ug_unitig_0.1167	395	Dispersed	DEP domain-containing mTOR-interacting protein	GO:0016020	NULL	none
evm.model.Ug_unitig_0.1168	401	Dispersed	Putative lipase/calmodulin-binding heat-shock protein	GO:0016042 GO:0004806	Carboxylesterase;Triacylglycerol_lipase	IOT
evm.model.Ug_unitig_0.117	380	Singleton	tRNA (guanine-N(7)-)-methyltransferase non-catalytic subunit	GO:0008618 GO:0043527 GO:0036265 GO:0005515 GO:0008176 GO:0005829 GO:0030488	tRNA_(guanine(46)-N(7))-methyltransferase	J
evm.model.Ug_unitig_0.1170	1011	Tandem	probable LRR receptor-like serine/threonine-protein kinase At3g47570	GO:0005524 GO:0005515 GO:0004672 GO:0006468	NULL	T
evm.model.Ug_unitig_0.1171	1058	Tandem	Serine/threonine protein kinase	GO:0005524 GO:0005515 GO:0004672 GO:0006468	NULL	T
evm.model.Ug_unitig_0.1172	784	Tandem	Serine/threonine protein kinase	GO:0005524 GO:0005515 GO:0004672 GO:0006468	NULL	T
evm.model.Ug_unitig_0.1177	307	Segmental	AT-hook motif nuclear-localized protein 9-like	GO:0000976 GO:0003680 GO:0043433 GO:0090377	NULL	K
evm.model.Ug_unitig_0.118	560	Dispersed	type I inositol polyphosphate 5-phosphatase 4-like	GO:0004439 GO:0034485 GO:0052658 GO:0052659 GO:0004445 GO:0046856	Phosphoinositide_5-phosphatase;Inositol-polyphosphate_5-phosphatase	T
evm.model.Ug_unitig_0.1180	406	Segmental	Transcription factor, Myb superfamily	GO:0001101 GO:0044212 GO:0030154 GO:0043565 GO:0009725 GO:1901700	NULL	K
evm.model.Ug_unitig_0.1181	490	Segmental	DEAD-box ATP-dependent RNA helicase 8	GO:0006417 GO:0003676 GO:0005524 GO:0010494 GO:0003724 GO:0070035 GO:0008186 GO:0010501 GO:0033962 GO:0000932 GO:0005730	Adenosinetriphosphatase;RNA_helicase;Nucleoside-triphosphate_phosphatase	A
evm.model.Ug_unitig_0.1184	421	Dispersed	putative threonine aspartase isoform X1	GO:0005737 GO:0051604 GO:0004298	Acting_on_peptide_bonds_(peptidases)	E
evm.model.Ug_unitig_0.1185	678	Dispersed	Malic enzyme	GO:0051287 GO:0005759 GO:0046872 GO:0004471 GO:0055114	Malate_dehydrogenase_(oxaloacetate-decarboxylating);Malate_dehydrogenase_(decarboxylating)	C
evm.model.Ug_unitig_0.1186	498	Dispersed	Digalactosyldiacylglycerol synthase 2, chloroplastic	GO:0009707 GO:0046481 GO:0019375	Digalactosyldiacylglycerol_synthase	S
evm.model.Ug_unitig_0.1187	897	Dispersed	Pentatricopeptide repeat-containing protein	GO:0005515 GO:0008270	NULL	S
evm.model.Ug_unitig_0.1188	288	Segmental	F-box protein PP2-A13-like	GO:0005515	NULL	S
evm.model.Ug_unitig_0.1189	633	Dispersed	probable methyltransferase PMT15	GO:0005802 GO:0016021 GO:0008757 GO:0032259	NULL	S
evm.model.Ug_unitig_0.119	372	Singleton	EKC/KEOPS complex subunit bud32-like isoform X1	GO:0003676 GO:0005524 GO:0000408 GO:0005829 GO:0004674 GO:0006468 GO:0070525	Transferring_phosphorus-containing_groups	T
evm.model.Ug_unitig_0.1190	561	Segmental	U-box domain-containing protein 3	GO:0005515 GO:0016874	NULL	S
evm.model.Ug_unitig_0.1192	383	Dispersed	Two-component response regulator	GO:0045893 GO:0010638 GO:0010492 GO:0010082 GO:0080022 GO:0010380 GO:0080113 GO:0080036 GO:0000156 GO:0009414 GO:0003677 GO:0003700 GO:0005515 GO:0031537 GO:0000160 GO:0090506	NULL	K
evm.model.Ug_unitig_0.1193	605	Dispersed	flap endonuclease GEN-like 1	GO:0006281 GO:0090305 GO:0048256 GO:0003690 GO:0009555 GO:0008821 GO:0003697	Acting_on_ester_bonds;Acting_on_ester_bonds;Crossover_junction_endodeoxyribonuclease	L
evm.model.Ug_unitig_0.1195	232	Singleton	protein CCC1-like isoform X1	GO:0016021 GO:0005381 GO:0005384 GO:0006880 GO:0030026 GO:0034755 GO:0071421	NULL	S
evm.model.Ug_unitig_0.1198	764	Dispersed	UTP:RNA uridylyltransferase 1-like	GO:0048584 GO:0071076 GO:0050265 GO:0016180 GO:0003729 GO:0071050 GO:1903705 GO:0006378 GO:0060964	RNA_uridylyltransferase	D
evm.model.Ug_unitig_0.1199	421	Segmental	FASCICLIN-like arabinogalactan protein 8	GO:0016021 GO:0046658	NULL	S
evm.model.Ug_unitig_0.120	338	Segmental	BIG SEEDS 1	GO:0003714 GO:0048366 GO:0009611 GO:2000022 GO:0031347 GO:1903507 GO:0042127	NULL	S
evm.model.Ug_unitig_0.1201	242	Tandem	LOB domain-containing protein 18	GO:0045893 GO:0010089 GO:0010311	NULL	S
evm.model.Ug_unitig_0.1202	227	Tandem	LOB domain-containing protein 19-like	GO:0045893	NULL	S
evm.model.Ug_unitig_0.1203	742	Singleton	Transketolase, chloroplastic	GO:0004801 GO:0006098 GO:0004802 GO:0005829 GO:0009535	Transaldolase;Transketolase	G
evm.model.Ug_unitig_0.1205	226	Segmental	Transcription factor, MADS-box	GO:0003677 GO:0046983	NULL	K
evm.model.Ug_unitig_0.1207	514	Segmental	Pectinesterase	GO:0045490 GO:0043086 GO:0045330 GO:0005618 GO:0005576 GO:0042545 GO:0046910 GO:0030599	Pectinesterase;Carboxylesterase	G
evm.model.Ug_unitig_0.1209	467	Dispersed	IRK-interacting protein-like	GO:0009959 GO:0009639	NULL	S
evm.model.Ug_unitig_0.121	379	Proximal	probable protein phosphatase 2C 51 isoform X1	GO:0004722 GO:0006470 GO:0043169 GO:0044424	Protein-serine/threonine_phosphatase	T
evm.model.Ug_unitig_0.1210	199	Segmental	vesicle-associated protein 1-3-like	GO:0005789	NULL	U
evm.model.Ug_unitig_0.1211	110	Singleton	hypothetical protein	noGO	NULL	S
evm.model.Ug_unitig_0.1212	717	Segmental	Scarecrow-like protein 22	GO:0051301 GO:0003700 GO:0048768 GO:0006355 GO:0043565 GO:0007623	NULL	K
evm.model.Ug_unitig_0.1214	228	Dispersed	Zinc finger protein ZAT9	GO:0003676	NULL	S
evm.model.Ug_unitig_0.1216	2327	Singleton	CCR4-NOT transcription complex subunit 1-like	GO:0030015 GO:0006417	NULL	K
evm.model.Ug_unitig_0.1217	592	Segmental	T-complex protein 1 subunit alpha	GO:0005524 GO:0005832 GO:0044183 GO:0061077 GO:0051082 GO:0006458	NULL	O
evm.model.Ug_unitig_0.1218	295	Segmental	Squamosa promoter-binding-like protein 8	GO:0003677 GO:0048653 GO:0046872	NULL	S
evm.model.Ug_unitig_0.122	986	Dispersed	ETO1-like protein 1	GO:0010364 GO:0005515	NULL	S
evm.model.Ug_unitig_0.1221	754	Dispersed	Elongation factor G, mitochondrial	GO:0005525 GO:0005524 GO:0003746 GO:0003924 GO:0046686 GO:0070125	Nucleoside-triphosphate_phosphatase	J
evm.model.Ug_unitig_0.1222	312	Segmental	Transcription factor GAMYB	GO:0003700 GO:0044839 GO:0045893 GO:0055047 GO:0043565	NULL	ADK
evm.model.Ug_unitig_0.1223	291	Segmental	homeobox-leucine zipper protein HAT4	GO:0003700 GO:0009506 GO:0010218 GO:0006355 GO:0043565 GO:0009641 GO:0009725	NULL	K
evm.model.Ug_unitig_0.1224	133	Singleton	Actin-related protein 2/3 complex subunit 5	GO:0030426 GO:0051015 GO:0014909 GO:0009825 GO:0021769 GO:0005737 GO:0030011 GO:0034314 GO:0051639 GO:0061842 GO:0005885 GO:0097581	NULL	Z
evm.model.Ug_unitig_0.1226	716	Dispersed	Eukaryotic translation initiation factor 3 subunit B	GO:0048034 GO:0003743 GO:0001732 GO:0016282 GO:0008495 GO:0016021 GO:0033290 GO:0031369 GO:0005852	Geranylgeranyl_diphosphate_synthase	J
evm.model.Ug_unitig_0.123	1108	Proximal	Serine/threonine protein phosphatase	GO:0004722 GO:0005524 GO:0005737 GO:0006470 GO:0010468 GO:0004674 GO:0006468 GO:0035556	Transferring_phosphorus-containing_groups;Protein-serine/threonine_phosphatase	T
evm.model.Ug_unitig_0.1233	662	Dispersed	Phosphatidylinositol 4-phosphate 5-kinase	GO:0016021 GO:0016301 GO:0016310	NULL	S
evm.model.Ug_unitig_0.1235	200	Dispersed	Cyclin	GO:0019901 GO:0016301 GO:0000079	NULL	D
evm.model.Ug_unitig_0.1236	148	Segmental	Nucleoside diphosphate kinase	GO:0005524 GO:0006228 GO:0046872 GO:0006241 GO:0006183 GO:0006165 GO:0004550 GO:0070301 GO:0005622	Nucleoside-diphosphate_kinase	F
evm.model.Ug_unitig_0.1241	503	Singleton	Putative dihydroorotate dehydrogenase (Quinone)-like	noGO	NULL	none
evm.model.Ug_unitig_0.1242	173	Dispersed	Blue copper protein	GO:0009055 GO:0022900	NULL	S
evm.model.Ug_unitig_0.1243	348	Dispersed	Xyloglucan endotransglucosylase/hydrolase	GO:0005618 GO:0016020 GO:0071555 GO:0004553 GO:0016762 GO:0010411 GO:0042546	Xyloglucan:xyloglucosyl_transferase	G
evm.model.Ug_unitig_0.1245	263	Dispersed	Putative ovule protein	noGO	NULL	S
evm.model.Ug_unitig_0.1247	234	Dispersed	AT-hook motif nuclear-localized protein	GO:0048440 GO:0003700 GO:0045892 GO:0048653 GO:0003680 GO:0005654	NULL	K
evm.model.Ug_unitig_0.1248	409	Dispersed	RING-type E3 ubiquitin transferase	GO:0004842 GO:0005829 GO:0010200 GO:0009414 GO:0051865	NULL	H
evm.model.Ug_unitig_0.1249	331	Dispersed	serine/threonine-protein kinase 16	GO:0005524 GO:0005829 GO:0004674 GO:0006468	Transferring_phosphorus-containing_groups	T
evm.model.Ug_unitig_0.125	163	Singleton	Putative ovule protein (Fragment)	noGO	NULL	none
evm.model.Ug_unitig_0.1250	382	Tandem	Phospholipase A(1) DAD1, chloroplastic	GO:0004620 GO:0052689 GO:0006629	Carboxylesterase	I
evm.model.Ug_unitig_0.1251	415	Tandem	Alpha/beta-Hydrolases superfamily protein	GO:0009536 GO:0004620 GO:0052689 GO:0006629	Carboxylesterase	I
evm.model.Ug_unitig_0.1252	1074	Singleton	glycine--tRNA ligase, chloroplastic/mitochondrial 2 isoform X1	GO:0009570 GO:0004820 GO:0005524 GO:0006426 GO:0009793 GO:0045995 GO:0016021 GO:0046983	Glycine--tRNA_ligase	J
evm.model.Ug_unitig_0.1255	163	Singleton	Metal transport system membrane protein	noGO	NULL	S
evm.model.Ug_unitig_0.1257	606	Segmental	RNA polymerase sigma factor	GO:0071482 GO:0000990 GO:0016987 GO:0003677 GO:0003700 GO:0009507 GO:2000142 GO:0000988 GO:0006399 GO:0043254 GO:0009658 GO:0010114	NULL	K
evm.model.Ug_unitig_0.1258	239	Segmental	50S ribosomal protein L3, chloroplastic	GO:0009570 GO:0003735 GO:0016020 GO:0009941 GO:0005840 GO:0006412	NULL	J
evm.model.Ug_unitig_0.1259	320	Dispersed	Utp--glucose-1-phosphate uridylyltransferase	GO:0003735 GO:0005763 GO:0070569 GO:0006412	NULL	GJ
evm.model.Ug_unitig_0.1262	304	Singleton	protein UPSTREAM OF FLC	noGO	NULL	P
evm.model.Ug_unitig_0.1263	111	Dispersed	Oxidoreductase/ transition metal ion binding protein	GO:0016021	NULL	none
evm.model.Ug_unitig_0.1264	139	Segmental	Calcium-binding EF-hand	GO:0005829 GO:0005509	NULL	T
evm.model.Ug_unitig_0.1267	282	Segmental	homeobox-leucine zipper protein HOX11-like	GO:0003700 GO:0006355 GO:0043565	NULL	K
evm.model.Ug_unitig_0.1269	536	Segmental	Putative O-fucosyltransferase family protein-like	GO:0009507 GO:0016757 GO:0016021 GO:0006004	NULL	G
evm.model.Ug_unitig_0.127	729	Dispersed	Peptidyl-prolyl cis-trans isomerase D	GO:0016018 GO:0008380 GO:0003755 GO:0051082 GO:0000413 GO:0042026	Peptidylprolyl_isomerase	O
evm.model.Ug_unitig_0.1271	433	Segmental	Chaperone protein like	GO:0031072 GO:0005524 GO:0010198 GO:0009408 GO:0046872 GO:0005737 GO:0051085 GO:0051082 GO:0042026 GO:0000740	NULL	O
evm.model.Ug_unitig_0.1272	1375	Segmental	Clustered mitochondria protein homolog	GO:0005737 GO:0003743 GO:0005515 GO:0016740 GO:0006413 GO:0048312	NULL	S
evm.model.Ug_unitig_0.1274	222	Segmental	Ras-related protein rgp1	GO:0003924 GO:0005525 GO:0006886 GO:0032482	Nucleoside-triphosphate_phosphatase	U
evm.model.Ug_unitig_0.1275	355	Segmental	transcription factor bHLH130-like	GO:0046983	NULL	K
evm.model.Ug_unitig_0.1277	171	Segmental	Zinc finger A20 and AN1 domain-containing stress-associated protein 8	GO:0003677 GO:0008270	NULL	S
evm.model.Ug_unitig_0.128	177	Dispersed	Histone H2A	GO:0003677 GO:0044030 GO:0000790 GO:0046982 GO:0006970 GO:0006342 GO:0000786 GO:0042742 GO:0016048	NULL	B
evm.model.Ug_unitig_0.1280	1731	Dispersed	DNA-directed RNA polymerase subunit	GO:0003677 GO:0006306 GO:0016604 GO:0003899 GO:0000419 GO:0006351 GO:0071359 GO:0030422 GO:0050832 GO:0005730 GO:0005666	DNA-directed_RNA_polymerase	KY
evm.model.Ug_unitig_0.1281	389	Dispersed	myosin heavy chain kinase B-like	GO:0005515 GO:0008168 GO:0016905 GO:0006468 GO:0032259	Transferring_phosphorus-containing_groups;Calcium/calmodulin-dependent_protein_kinase;[Myosin_heavy-chain]_kinase	S
evm.model.Ug_unitig_0.1282	528	Segmental	Glycosyltransferase-like KOBITO 1	GO:0009831 GO:0009663 GO:0005886 GO:0071482 GO:0009826 GO:0009749 GO:0005802 GO:0009737 GO:2001009 GO:0010215 GO:0030154 GO:0016021 GO:0016740 GO:0010078	NULL	S
evm.model.Ug_unitig_0.1283	448	Dispersed	Geranylgeranyl diphosphate reductase, chloroplastic-like	GO:0071949 GO:0015995 GO:0033385 GO:0045550 GO:0033521 GO:0102067 GO:0055114 GO:0015979 GO:0010189 GO:0004497 GO:0009535	Geranylgeranyl_diphosphate_reductase	C
evm.model.Ug_unitig_0.1285	311	Segmental	pheromone-processing carboxypeptidase KEX1-like	noGO	NULL	S
evm.model.Ug_unitig_0.1287	710	Singleton	glutamine--fructose-6-phosphate aminotransferase [isomerizing] 2	GO:0097367 GO:0004360 GO:0006002 GO:0006541 GO:0016021 GO:0006047 GO:0006487 GO:0016853	Glutamine--fructose-6-phosphate_transaminase_(isomerizing)	M
evm.model.Ug_unitig_0.1288	380	Segmental	Ribosomal protein	GO:0009570 GO:0003723 GO:0000470 GO:0003735 GO:0009941 GO:0006412 GO:0009535	NULL	J
evm.model.Ug_unitig_0.1289	282	Segmental	Putative ovule protein	GO:0009706 GO:0016021	NULL	S
evm.model.Ug_unitig_0.129	351	Dispersed	Translation initiation factor IF-2 like	noGO	NULL	S
evm.model.Ug_unitig_0.1290	1041	Segmental	protein argonaute 1-like isoform X1	GO:0003676 GO:0005515 GO:0016740 GO:0031047	NULL	J
evm.model.Ug_unitig_0.1292	301	Dispersed	Putative DHHA1 domain protein-like	noGO	NULL	none
evm.model.Ug_unitig_0.1293	240	Segmental	NAC domain-containing protein 86-like isoform X1	GO:0003677 GO:0006355	NULL	K
evm.model.Ug_unitig_0.1294	694	Segmental	Putative cyclic nucleotide-gated ion channel 20, chloroplastic-like	GO:0005249 GO:0005887 GO:0071805 GO:0042391 GO:0009624 GO:0009987	NULL	PT
evm.model.Ug_unitig_0.1295	188	Dispersed	transcriptional activator Myb-like	GO:0009651 GO:2000031 GO:0000989 GO:0000988 GO:0044212 GO:0043565 GO:0046686 GO:0042742 GO:0009723 GO:0000981 GO:0009414 GO:0001135 GO:0006357 GO:0009739 GO:0010929 GO:0001076 GO:0009737 GO:0030154 GO:2000022 GO:0050832 GO:0010200	NULL	ADK
evm.model.Ug_unitig_0.1296	1157	Segmental	Dual specificity protein kinase pom1	GO:0005524 GO:0004672 GO:0006468	NULL	T
evm.model.Ug_unitig_0.1298	645	Segmental	haloacid dehalogenase-like hydrolase domain-containing protein At3g48420	GO:0009570 GO:0009941 GO:0050309 GO:0016311 GO:0003850	Sugar-terminal-phosphatase;Sugar-phosphatase;2-deoxyglucose-6-phosphatase	S
evm.model.Ug_unitig_0.1299	353	Segmental	Pectate lyase	GO:0030570 GO:0046872 GO:0045490	Pectate_lyase	G
evm.model.Ug_unitig_0.130	186	Segmental	Auxin-responsive protein	GO:0005515 GO:0006355 GO:0009734	NULL	K
evm.model.Ug_unitig_0.1301	375	Dispersed	Cysteine proteinase Cathepsin L	GO:0005788 GO:0005615 GO:0004197 GO:0009555 GO:0010623 GO:0050832 GO:0009626 GO:0051603 GO:0005764	Acting_on_peptide_bonds_(peptidases)	O
evm.model.Ug_unitig_0.1302	306	Segmental	31 kDa ribonucleoprotein, chloroplastic	GO:0003723 GO:1901259 GO:1990904 GO:0009535	NULL	A
evm.model.Ug_unitig_0.1305	200	Singleton	High-affinity nitrate transporter	GO:0015112 GO:0098656 GO:0015706 GO:0009611 GO:0016021 GO:0010167 GO:0005886 GO:0042128	NULL	S
evm.model.Ug_unitig_0.131	605	Dispersed	putative pentatricopeptide repeat-containing protein At1g12700, mitochondrial	GO:0005515	NULL	S
evm.model.Ug_unitig_0.1310	503	Proximal	Cytochrome P450 CYP2 subfamily	GO:0016705 GO:0005506 GO:0016020 GO:0055114 GO:0020037	NULL	Q
evm.model.Ug_unitig_0.1311	201	Proximal	50S ribosomal protein L19, chloroplastic	GO:0005840 GO:0003735 GO:0006412	NULL	J
evm.model.Ug_unitig_0.1312	204	Dispersed	protein DEHYDRATION-INDUCED 19 homolog 5-like isoform X2	noGO	NULL	S
evm.model.Ug_unitig_0.1314	775	Dispersed	Amine oxidase	GO:0005507 GO:0008131 GO:0048038 GO:0009308 GO:0055114	Primary-amine_oxidase	Q
evm.model.Ug_unitig_0.1315	176	Dispersed	protein LATERAL ORGAN BOUNDARIES-like	GO:0010199	NULL	S
evm.model.Ug_unitig_0.1317	342	Dispersed	plant UBX domain-containing protein 10-like	GO:0005515	NULL	T
evm.model.Ug_unitig_0.1318	279	Dispersed	Motile sperm domain-containing protein 2	noGO	NULL	I
evm.model.Ug_unitig_0.132	292	Dispersed	Iron-sulfur protein NUBPL	GO:0005524 GO:0016301 GO:0016787 GO:0016310	NULL	D
evm.model.Ug_unitig_0.1320	946	Singleton	vacuolar protein sorting-associated protein 18 homolog	GO:0007040 GO:0035542 GO:0060036 GO:0007032 GO:0033263 GO:0043485 GO:0008333 GO:0007634 GO:0006886 GO:0048069 GO:0045176 GO:0006904 GO:0030674 GO:0010015 GO:0030897 GO:0015721	NULL	U
evm.model.Ug_unitig_0.1321	258	Singleton	Mitochondrial inner membrane translocase subunit Tim17/Tim22/Tim23/peroxisomal protein PMP24	GO:0016021	NULL	S
evm.model.Ug_unitig_0.1322	383	Singleton	Putative membrane protein	GO:0016020 GO:0005515	NULL	S
evm.model.Ug_unitig_0.1324	461	Segmental	dof zinc finger protein DOF5.6-like	GO:0003677 GO:0003700 GO:0045893 GO:0010067	NULL	K
evm.model.Ug_unitig_0.1326	304	Singleton	Histidine biosynthesis bifunctional protein hisIE, chloroplastic	GO:0009570 GO:0000166 GO:0004636 GO:0004635 GO:0000105	Phosphoribosyl-ATP_diphosphatase;Phosphoribosyl-AMP_cyclohydrolase	E
evm.model.Ug_unitig_0.1327	2171	Singleton	serine/threonine-protein kinase ATM isoform X1	GO:0000166 GO:0043170 GO:0006807 GO:0016310 GO:0044238 GO:0004674 GO:0006974	Transferring_phosphorus-containing_groups	BDLT
evm.model.Ug_unitig_0.1328	808	Dispersed	Serine/threonine-protein kinase ATM	GO:0006281 GO:0000077 GO:2001020 GO:0005524 GO:0008380 GO:0005515 GO:0016021 GO:0000723 GO:0016572 GO:0004674 GO:0010212	Transferring_phosphorus-containing_groups	BDLT
evm.model.Ug_unitig_0.133	753	Dispersed	Myosin-binding protein 4	GO:0017022	NULL	S
evm.model.Ug_unitig_0.1331	640	Dispersed	Protein EXECUTER 2, chloroplastic	GO:0000304 GO:0042651	NULL	S
evm.model.Ug_unitig_0.1332	638	Dispersed	polygalacturonase 1 beta-like protein 3	noGO	NULL	S
evm.model.Ug_unitig_0.1333	333	Segmental	Bidirectional sugar transporter SWEET	GO:0005887 GO:0005515 GO:0051260 GO:0034219 GO:0051119	NULL	U
evm.model.Ug_unitig_0.1334	1505	Dispersed	BAH domain protein	GO:0003682	NULL	K
evm.model.Ug_unitig_0.1336	172	Dispersed	Pentatricopeptide repeat-containing protein	GO:0005515	NULL	S
evm.model.Ug_unitig_0.1337	526	Segmental	microtubule-associated protein TORTIFOLIA1-like	GO:0005874 GO:0008017	NULL	S
evm.model.Ug_unitig_0.1339	219	Segmental	Basic helix-loop-helix transcription factor	GO:0003700 GO:0006355 GO:0046983 GO:0043565	NULL	K
evm.model.Ug_unitig_0.134	491	Dispersed	transcription factor bHLH3	GO:0010629 GO:0003700 GO:0006355 GO:0046983	NULL	K
evm.model.Ug_unitig_0.1340	329	Dispersed	dnaJ homolog subfamily B member 1	GO:0032781 GO:0051087 GO:0005829 GO:0051085 GO:0051082 GO:0001671 GO:0005886 GO:0005654	NULL	O
evm.model.Ug_unitig_0.1341	440	Dispersed	Sulfoquinovosyl transferase SQD2	GO:0005524 GO:0003777 GO:0000030 GO:0097502 GO:0009941 GO:0009247 GO:0046510 GO:0007018 GO:0016036 GO:0046506 GO:0008017	Nucleoside-triphosphate_phosphatase	IMO
evm.model.Ug_unitig_0.1342	693	Dispersed	mRNA-capping enzyme-like isoform X1	GO:0006281 GO:0006370 GO:0006266 GO:0006310 GO:0004482 GO:0004484 GO:0004651 GO:0008138 GO:0005525 GO:0005524 GO:0050355 GO:0003910 GO:0004725 GO:0010628 GO:0098501 GO:0016021 GO:0098507 GO:0106005 GO:0035335	mRNA_guanylyltransferase;Triphosphatase;Protein-serine/threonine_phosphatase;Protein-tyrosine-phosphatase;mRNA_(guanine-N(7)-)-methyltransferase;Polynucleotide_5-phosphatase;DNA_ligase_(ATP)	A
evm.model.Ug_unitig_0.1344	304	Dispersed	Mitochondrial uncoupling protein 1	GO:1990542 GO:0031966 GO:1902600 GO:0016021 GO:0017077	NULL	C
evm.model.Ug_unitig_0.1345	405	Dispersed	Fructose-1,6-bisphosphatase, chloroplastic	GO:0009570 GO:0006094 GO:0032440 GO:0006002 GO:0042132 GO:0006000 GO:0009773 GO:0009735 GO:0005986 GO:0009409 GO:0005829 GO:0016311 GO:0030388	2-alkenal_reductase_(NAD(P)(+));Sugar-phosphatase;Fructose-bisphosphatase	G
evm.model.Ug_unitig_0.1346	224	Dispersed	E3 ubiquitin-protein ligase MARCH2	GO:0008270	NULL	A
evm.model.Ug_unitig_0.1347	306	Dispersed	Phosphatidylinositol:ceramide inositolphosphotransferase 1	GO:0045140 GO:0005887 GO:0005802 GO:0047493 GO:0033188 GO:0030173 GO:0030176 GO:0046513	Ceramide_cholinephosphotransferase;Sphingomyelin_synthase	S
evm.model.Ug_unitig_0.1348	626	Dispersed	Laccase	GO:0016722 GO:0005507 GO:0009809 GO:0016020 GO:0055114 GO:0005576	NULL	Q
evm.model.Ug_unitig_0.135	639	Dispersed	Kinesin light chain, putative	GO:0090090 GO:0060271 GO:2000095 GO:0005515	NULL	Z
evm.model.Ug_unitig_0.1351	78	Singleton	Aspartyl/glutamyl-tRNA (Asn/Gln) amidotransferase subunit B	GO:0009507 GO:0032153 GO:0003924 GO:0005525 GO:0016740 GO:0010020 GO:0051301	Nucleoside-triphosphate_phosphatase	none
evm.model.Ug_unitig_0.1352	185	Singleton	Putative membrane protein	GO:0016021	NULL	S
evm.model.Ug_unitig_0.1353	367	Singleton	Bifunctional nitrilase/nitrile hydratase NIT4A	GO:0080061 GO:0009684 GO:0009970 GO:0047558 GO:0046686 GO:0005886 GO:0047427 GO:0080109 GO:0009507 GO:0051410 GO:0009506 GO:0019762 GO:0005829 GO:0019500	Nitrile_hydratase;3-cyanoalanine_hydratase;Cyanoalanine_nitrilase;Nitrilase	E
evm.model.Ug_unitig_0.1354	141	Dispersed	Photosystem I subunit O	GO:0005515 GO:0016021 GO:0009522 GO:0009768 GO:0009767 GO:0009535	NULL	S
evm.model.Ug_unitig_0.1355	563	Singleton	Nicalin	GO:0005789 GO:0048484 GO:0009506 GO:1900176 GO:0016021 GO:0016485 GO:0004177 GO:0005774 GO:0005886 GO:0098827	Acting_on_peptide_bonds_(peptidases)	E
evm.model.Ug_unitig_0.1356	236	Dispersed	Protein TPRXL-like	noGO	NULL	S
evm.model.Ug_unitig_0.1357	181	Dispersed	protein FAF-like, chloroplastic	noGO	NULL	S
evm.model.Ug_unitig_0.1358	451	Segmental	glucan endo-1,3-beta-glucosidase 14	GO:0005975 GO:0005737 GO:0016021 GO:0042973 GO:0001871 GO:0046658 GO:0030247	Beta-glucosidase;Glucan_endo-1,3-beta-D-glucosidase	G
evm.model.Ug_unitig_0.1359	216	Segmental	Ribosomal protein	GO:0003723 GO:0009506 GO:0090696 GO:0000470 GO:0003735 GO:0015934 GO:0005730 GO:0009955 GO:0005886 GO:0042788 GO:0006412	NULL	J
evm.model.Ug_unitig_0.1360	385	Dispersed	CMP-N-acetylneuraminate-beta-galactosamide-alpha-2, 3-sialyltransferase 2-like	GO:0001665 GO:0006493 GO:1990743 GO:0003836 GO:0016021 GO:0008378 GO:0000139 GO:0018279 GO:0009311 GO:0098791	Alpha-N-acetylgalactosaminide_alpha-2,6-sialyltransferase;Glycosyltransferases;Beta-galactoside_alpha-2,3-sialyltransferase	G
evm.model.Ug_unitig_0.1365	436	Dispersed	Protein kinase, catalytic domain-containing protein	GO:0005524 GO:0005737 GO:0004674 GO:0006468 GO:0005886	Transferring_phosphorus-containing_groups	T
evm.model.Ug_unitig_0.1367	307	Segmental	A-agglutinin anchorage subunit like	noGO	NULL	S
evm.model.Ug_unitig_0.1370	192	Segmental	Uncharacterized protein	noGO	NULL	S
evm.model.Ug_unitig_0.1371	168	Segmental	Uncharacterized protein	noGO	NULL	S
evm.model.Ug_unitig_0.1372	229	Segmental	Putative ovule protein	noGO	NULL	S
evm.model.Ug_unitig_0.1374	529	Segmental	Glucomannan 4-beta-mannosyltransferase 2-like	GO:0016021 GO:0047259 GO:0097502	Glucomannan_4-beta-mannosyltransferase	M
evm.model.Ug_unitig_0.1375	541	Segmental	Serine/threonine protein kinase	GO:0005524 GO:0050684 GO:0005737 GO:0004674 GO:0006468 GO:0035556 GO:0000245	Transferring_phosphorus-containing_groups	T
evm.model.Ug_unitig_0.1376	533	Segmental	Pheophorbide a oxygenase, chloroplastic	GO:0009706 GO:0009816 GO:0008219 GO:0009534 GO:0016021 GO:0032441 GO:0055114 GO:0010277 GO:0051537 GO:0015996	Acting_on_single_donors_with_incorporation_of_molecular_oxygen_(oxygenases)._The_oxygen_incorporated_need_not_be_derived_from_O(2);Chlorophyllide_a_oxygenase;Pheophorbide_a_oxygenase	P
evm.model.Ug_unitig_0.1378	549	Dispersed	alpha-L-fucosidase 1	GO:0006516 GO:0005975 GO:0004560 GO:0016021	Alpha-L-fucosidase	G
evm.model.Ug_unitig_0.1379	662	Segmental	ABC transporter F family member 1-like	GO:0005524 GO:0016829 GO:0016887	Adenosinetriphosphatase;Nucleoside-triphosphate_phosphatase	S
evm.model.Ug_unitig_0.138	931	Segmental	Autophagy-related protein 9	GO:0044805 GO:0030659 GO:0034497 GO:0000407 GO:0015031 GO:0016021 GO:0050832 GO:0000422 GO:0005776	NULL	U
evm.model.Ug_unitig_0.1380	102	Singleton	Uncharacterized protein	noGO	NULL	none
evm.model.Ug_unitig_0.1382	1079	Dispersed	Receptor-like serine/threonine-protein kinase NCRK	GO:0005524 GO:0051020 GO:0010008 GO:0007178 GO:0006468 GO:0010089 GO:0005886 GO:0004675	Transferring_phosphorus-containing_groups	T
evm.model.Ug_unitig_0.1385	77	Segmental	ubiquitin-like protein 5	GO:0005515 GO:0005737 GO:0006464 GO:0031386 GO:0000398	NULL	O
evm.model.Ug_unitig_0.1386	817	Segmental	Homeobox-leucine zipper protein REVOLUTA	GO:0003700 GO:0044212 GO:0030154 GO:0006355 GO:0043565 GO:0008289 GO:0009956 GO:0009944 GO:0010089 GO:0009855 GO:0010014	NULL	K
evm.model.Ug_unitig_0.1387	329	Dispersed	serine/threonine-protein phosphatase 7 long form homolog	noGO	NULL	S
evm.model.Ug_unitig_0.1388	154	Segmental	Putative senescence regulator S40	noGO	NULL	S
evm.model.Ug_unitig_0.1389	388	Dispersed	F-box/kelch-repeat protein	GO:0043161 GO:0031625 GO:0005737 GO:0030162 GO:0019005 GO:0016874	NULL	S
evm.model.Ug_unitig_0.139	139	Dispersed	Chromatin modification-related protein MEAF6	GO:0035267 GO:0043968 GO:1990467 GO:1990468 GO:0044154 GO:0043981 GO:0070776 GO:0043983 GO:0043994 GO:0043982 GO:0005730	Arylamine_N-acetyltransferase;Histone_acetyltransferase	S
evm.model.Ug_unitig_0.1391	248	Singleton	probable pyridoxal 5-phosphate synthase subunit PDX2	GO:0004359 GO:0042823 GO:0046982 GO:0005829 GO:1903600 GO:0036381 GO:0008614	Glutaminase;Pyridoxal_5-phosphate_synthase_(glutamine_hydrolyzing)	H
evm.model.Ug_unitig_0.1392	420	Segmental	Zinc finger protein jackdaw	GO:0003676 GO:0003700 GO:0046872	NULL	S
evm.model.Ug_unitig_0.1393	484	Dispersed	Cell division control protein	GO:0051301 GO:0006270 GO:0042023	NULL	DL
evm.model.Ug_unitig_0.1394	301	Dispersed	Putative tetraspanin-3-like	GO:0009506 GO:0005886 GO:0016021	NULL	S
evm.model.Ug_unitig_0.1396	223	Singleton	NEDD8-specific protease 1	GO:0006508 GO:0019784	NULL	S
evm.model.Ug_unitig_0.1397	374	Dispersed	Mitogen-activated protein kinase	GO:0010120 GO:1901002 GO:0010183 GO:0009611 GO:0009555 GO:0080136 GO:0042742 GO:0009414 GO:0006979 GO:0005524 GO:0009738 GO:0005737 GO:0010229 GO:0010468 GO:0004707 GO:0050826 GO:0048481 GO:0050832 GO:0010200 GO:0010224	Transferring_phosphorus-containing_groups;Mitogen-activated_protein_kinase	T
evm.model.Ug_unitig_0.140	562	Singleton	geranylgeranyl transferase type-2 subunit alpha-like isoform X1	GO:0005968 GO:0005829 GO:0042981 GO:0046686 GO:0018344 GO:0004663 GO:0007601 GO:0017137 GO:0043687 GO:0005886 GO:0005654	Protein_geranylgeranyltransferase_type_II	O
evm.model.Ug_unitig_0.1411	177	Segmental	WUSCHEL-related homeobox 3	GO:0008283 GO:0010482 GO:0003677 GO:0009947 GO:0003700 GO:0006355 GO:0009943	NULL	K
evm.model.Ug_unitig_0.1412	103	Segmental	Histone H4	GO:0003677 GO:0009507 GO:0009506 GO:0046982 GO:0005829 GO:0000786 GO:0005730 GO:0005774 GO:0005886 GO:0009579 GO:0009414	NULL	B
evm.model.Ug_unitig_0.1414	243	Singleton	Dirigent protein	GO:0090305 GO:0003723 GO:0009451 GO:0004519 GO:0043231	NULL	L
evm.model.Ug_unitig_0.1415	570	Proximal	Cytochrome P450	GO:0005506 GO:0016021 GO:0016709 GO:0055114 GO:0020037	Acting_on_paired_donors,_with_incorporation_or_reduction_of_molecular_oxygen._The_oxygen_incorporated_need_not_be_derived_from_O(2)	Q
evm.model.Ug_unitig_0.1416	158	Singleton	ATP synthase subunit b like	noGO	NULL	S
evm.model.Ug_unitig_0.1417	203	Dispersed	Transcription factor MYB59	GO:0000989 GO:0000988 GO:0044212 GO:0009753 GO:0043565 GO:0046686 GO:0009751 GO:0009723 GO:0000981 GO:0001135 GO:0006357 GO:0009739 GO:0001076 GO:0030154 GO:0010200	NULL	ADK
evm.model.Ug_unitig_0.142	253	Dispersed	NAC domain-containing protein 21/22-like	GO:0003677 GO:0003700 GO:0010072 GO:0006355 GO:0009734 GO:0048527	NULL	K
evm.model.Ug_unitig_0.1420	488	Segmental	Ataxin-7-like protein	noGO	NULL	U
evm.model.Ug_unitig_0.1421	672	Segmental	probable protein phosphatase 2C 4	GO:0048366 GO:0005886 GO:0004724 GO:0006470	Protein-serine/threonine_phosphatase	T
evm.model.Ug_unitig_0.1422	315	Singleton	ribosome production factor 2 homolog	GO:0000463 GO:0032774 GO:0019843 GO:0000027 GO:0005730	NULL	J
evm.model.Ug_unitig_0.1423	315	Segmental	CAX-interacting protein 4	GO:0005737 GO:0003676 GO:0008270	NULL	S
evm.model.Ug_unitig_0.1424	385	Dispersed	protein PMR5-like	GO:0016021	NULL	S
evm.model.Ug_unitig_0.1425	266	Dispersed	protein INVOLVED IN DE NOVO 2-like	GO:0031047	NULL	S
evm.model.Ug_unitig_0.1426	284	Singleton	L-aminoadipate-semialdehyde dehydrogenase-phosphopantetheinyl transferase-like	GO:0000287 GO:0015939 GO:0005829 GO:0019878 GO:0008897	Holo-[acyl-carrier-protein]_synthase	EH
evm.model.Ug_unitig_0.143	64	Segmental	H/ACA ribonucleoprotein complex subunit 3-like protein	GO:0031429 GO:0031118 GO:0070034 GO:1904874 GO:0031120 GO:0090661 GO:0007004 GO:0072589 GO:0034513	NULL	J
evm.model.Ug_unitig_0.1436	196	Dispersed	dnaJ homolog subfamily B member 9-like isoform X2	noGO	NULL	O
evm.model.Ug_unitig_0.1437	144	Singleton	protein preY, mitochondrial	noGO	NULL	S
evm.model.Ug_unitig_0.1438	302	Dispersed	Agamous-like MADS-box protein AGL15	GO:0010262 GO:0042803 GO:2000692 GO:0000977 GO:0060867 GO:0045487 GO:0045944 GO:0060862 GO:0004601 GO:0003700 GO:0045892 GO:0071365 GO:0048577 GO:0005737 GO:0098869 GO:0055114 GO:0010047	Peroxidase	K
evm.model.Ug_unitig_0.1439	240	Singleton	Putative ovule protein (Fragment)	GO:0016021	NULL	none
evm.model.Ug_unitig_0.144	134	Dispersed	probable 60S ribosomal protein L14	GO:0009507 GO:0009506 GO:0003735 GO:0042273 GO:0003729 GO:0005730 GO:0005774 GO:0006412 GO:0042788	NULL	J
evm.model.Ug_unitig_0.1440	267	Singleton	Putative tRNA (Cytidine(34)-2-O)-methyltransferase (Fragment)	GO:0008173 GO:0003723 GO:0002131 GO:0002132	NULL	J
evm.model.Ug_unitig_0.1441	396	Singleton	chromo domain protein LHP1-like	GO:0035064 GO:0043565 GO:0003682 GO:0006342 GO:0045857 GO:0009910 GO:0005720 GO:0009507 GO:0000791 GO:0009825 GO:0003935 GO:0010016 GO:0010048	GTP_cyclohydrolase_II	B
evm.model.Ug_unitig_0.1442	173	Dispersed	Phosphatidylinositol N-acetylglucosaminyltransferase subunit P	GO:0000506 GO:0098827 GO:0016021 GO:0017176 GO:0006506	Phosphatidylinositol_N-acetylglucosaminyltransferase	S
evm.model.Ug_unitig_0.1443	683	Dispersed	Eukaryotic translation initiation factor 3 subunit B	GO:0048034 GO:0003743 GO:0001732 GO:0016282 GO:0008495 GO:0016021 GO:0033290 GO:0031369 GO:0005852	Geranylgeranyl_diphosphate_synthase	J
evm.model.Ug_unitig_0.1444	231	Segmental	MYB19 (Fragment)	GO:0001076 GO:0000989 GO:0048354 GO:0000988 GO:0044212 GO:0043565 GO:0000981 GO:0001135 GO:0006357	NULL	K
evm.model.Ug_unitig_0.1445	470	Dispersed	alpha-L-fucosidase 1-like	GO:0006516 GO:0016139 GO:0004560 GO:0006004 GO:0005764	Alpha-L-fucosidase	G
evm.model.Ug_unitig_0.1446	437	Dispersed	Myelin-associated oligodendrocyte basic protein	GO:0016020	NULL	S
evm.model.Ug_unitig_0.1447	438	Dispersed	Amino acid transporter	GO:0016021 GO:0015171 GO:0005774 GO:0003333	NULL	E
evm.model.Ug_unitig_0.1449	529	Dispersed	protein WVD2-like 7 isoform X2	noGO	NULL	S
evm.model.Ug_unitig_0.145	216	Dispersed	CRIB domain-containing protein RIC6-like	GO:0009860 GO:0009416 GO:0016324	NULL	S
evm.model.Ug_unitig_0.1450	263	Segmental	Cystinosin-like protein	GO:1902475 GO:0015184 GO:0016021 GO:0005774 GO:0015811	NULL	E
evm.model.Ug_unitig_0.1451	473	Dispersed	Ultraviolet-b receptor uvr8	GO:0016021 GO:0016874	NULL	DZ
evm.model.Ug_unitig_0.1452	73	Segmental	RPM1-interacting protein 4-like	GO:0005886 GO:0010204	NULL	S
evm.model.Ug_unitig_0.1455	122	Singleton	Plexin-D1 like	noGO	NULL	none
evm.model.Ug_unitig_0.1456	269	Segmental	Putative SGF29 tudor-like domain-containing protein	GO:0043967 GO:0043966 GO:0051123 GO:0009651 GO:0035064 GO:0005671 GO:0000124 GO:0001135	NULL	S
evm.model.Ug_unitig_0.1457	331	Singleton	glucuronokinase 1-like	GO:0005524 GO:0006020 GO:0005829 GO:0008266 GO:0047940 GO:0016310 GO:0042546 GO:0048868	Glucuronokinase	G
evm.model.Ug_unitig_0.1461	897	Segmental	Zinc finger CCCH domain-containing protein 41	GO:0046872 GO:0003729	NULL	A
evm.model.Ug_unitig_0.1464	396	Dispersed	Glycosyl transferase	GO:0008375 GO:0016021 GO:0000139	NULL	S
evm.model.Ug_unitig_0.1465	471	Dispersed	chaperone protein dnaJ 1, mitochondrial isoform X1	GO:0005524 GO:0031072 GO:0009408 GO:0005737 GO:0051085 GO:0051082 GO:0042026	NULL	O
evm.model.Ug_unitig_0.1477	463	Dispersed	protein HESO1-like	GO:0071076 GO:0050265 GO:0005737 GO:0060964	RNA_uridylyltransferase	D
evm.model.Ug_unitig_0.1479	491	Segmental	Glycosyltransferase	GO:0043231 GO:0008194 GO:0016758	NULL	CG
evm.model.Ug_unitig_0.148	675	Dispersed	tetratricopeptide repeat protein 7A-like	GO:0005515	NULL	T
evm.model.Ug_unitig_0.1480	598	Dispersed	Coronatine-insensitive protein 1	GO:0009641 GO:0009861 GO:0009901 GO:0042742 GO:0009625 GO:0002213 GO:0004842 GO:0005515 GO:0009909 GO:0010218 GO:0031146 GO:0019005 GO:0010118 GO:2000022 GO:0050832 GO:0031348 GO:0016567	NULL	S
evm.model.Ug_unitig_0.1487	132	Dispersed	Hydrogen peroxide induced protein 1	noGO	NULL	none
evm.model.Ug_unitig_0.1488	518	Dispersed	pentatricopeptide repeat-containing protein At5g42310, mitochondrial-like isoform X2	GO:0005515	NULL	S
evm.model.Ug_unitig_0.1489	170	Dispersed	TRP-like ion channel pkd2	GO:0016021	NULL	S
evm.model.Ug_unitig_0.149	294	Segmental	Auxin-responsive protein	GO:0003700 GO:0005515 GO:0006355 GO:0010200 GO:0009733	NULL	K
evm.model.Ug_unitig_0.1490	680	Dispersed	Clade XV lectin receptor kinase	GO:0005524 GO:0002229 GO:0004674 GO:0006468 GO:0030246 GO:0005886	Transferring_phosphorus-containing_groups	T
evm.model.Ug_unitig_0.1491	130	Singleton	protein FAM32A	GO:0005730	NULL	S
evm.model.Ug_unitig_0.1492	320	Dispersed	Protein STRUBBELIG-RECEPTOR FAMILY 5	GO:0018108 GO:0005524 GO:0004715 GO:0016021 GO:0007178 GO:0005886 GO:0004675	Transferring_phosphorus-containing_groups;Transferring_phosphorus-containing_groups;Non-specific_protein-tyrosine_kinase	T
evm.model.Ug_unitig_0.1494	186	Singleton	N-alpha-acetyltransferase MAK3	GO:0031417 GO:0017196 GO:0004596	Arylamine_N-acetyltransferase;Acyltransferases	S
evm.model.Ug_unitig_0.1495	464	Dispersed	Sialyltransferase-like protein 1	GO:0005802 GO:0009860 GO:0003836 GO:0032580 GO:0016021 GO:0097503 GO:0003828 GO:0018279 GO:0009311 GO:0009846 GO:0005576	Alpha-N-acetylneuraminate_alpha-2,8-sialyltransferase;Beta-galactoside_alpha-2,3-sialyltransferase;Glycosyltransferases	G
evm.model.Ug_unitig_0.1496	824	Dispersed	Nuclear factor related to kappa-B-binding protein	GO:0031011	NULL	none
evm.model.Ug_unitig_0.1497	381	Dispersed	Nodulation receptor kinase	GO:0005524 GO:0016021 GO:0006468 GO:0005886 GO:0004675	Transferring_phosphorus-containing_groups	T
evm.model.Ug_unitig_0.15	718	Dispersed	Galactinol--sucrose galactosyltransferase	GO:0047274 GO:0010325	Galactinol--sucrose_galactosyltransferase	S
evm.model.Ug_unitig_0.150	600	Dispersed	protein QUIRKY-like	GO:0045806 GO:0046928 GO:0016757 GO:1902883 GO:0005789 GO:0005509 GO:0048168 GO:0016021 GO:0055037 GO:0030672 GO:0019722 GO:0030336 GO:0098827	NULL	S
evm.model.Ug_unitig_0.1501	249	Dispersed	Haloacid dehalogenase-like hydrolase superfamily protein (Fragment)	GO:0050309 GO:0016311	Sugar-terminal-phosphatase;Sugar-phosphatase	S
evm.model.Ug_unitig_0.1508	775	Dispersed	Vacuolar protein sorting-associated protein like	GO:0044425 GO:0033365	NULL	U
evm.model.Ug_unitig_0.1513	1634	Dispersed	Helicase, C-terminal	GO:0061630 GO:0031625 GO:0000209 GO:0006974 GO:0005654 GO:0004386 GO:0005524 GO:0046872	Adenosinetriphosphatase;Nucleoside-triphosphate_phosphatase	L
evm.model.Ug_unitig_0.1514	183	Segmental	Rubredoxin like	GO:0009507 GO:0005506 GO:0009055 GO:0016021 GO:0022900 GO:0043448	NULL	C
evm.model.Ug_unitig_0.1515	254	Segmental	Lecithin retinol acyltransferase	GO:0047173 GO:0102279	Phosphatidylcholine--retinol_O-acyltransferase	S
evm.model.Ug_unitig_0.1516	244	Dispersed	Late embryogenesis abundant protein, LEA-14	GO:1902074 GO:0009737 GO:0006970 GO:0010116 GO:0005829 GO:0005886 GO:0016021	NULL	S
evm.model.Ug_unitig_0.1517	586	Segmental	Putative serine/arginine repetitive matrix protein 3-like	noGO	NULL	S
evm.model.Ug_unitig_0.152	520	Singleton	Armadillo-like helical	noGO	NULL	S
evm.model.Ug_unitig_0.1524	313	Dispersed	uncharacterized protein K02A2.6-like	noGO	NULL	L
evm.model.Ug_unitig_0.1525	313	Singleton	Zinc finger protein 830	GO:0003676 GO:0008270 GO:0005681	NULL	A
evm.model.Ug_unitig_0.1527	279	Singleton	Uncharacterized protein (Fragment)	noGO	NULL	S
evm.model.Ug_unitig_0.153	934	Segmental	Viral inhibitor of RIP activation	noGO	NULL	S
evm.model.Ug_unitig_0.1531	626	Dispersed	Rhamnogalacturonan endolyase	GO:0005975 GO:0016829 GO:0030246	NULL	S
evm.model.Ug_unitig_0.1541	360	Segmental	Mutant 10-hydroxygeraniol dehydrogenase	GO:0000166 GO:0008270 GO:0045551 GO:0009809 GO:0055114 GO:0102311 GO:0047924 GO:0052747	8-hydroxygeraniol_dehydrogenase;Cinnamyl-alcohol_dehydrogenase;Geraniol_dehydrogenase_(NADP(+))	Q
evm.model.Ug_unitig_0.1546	1243	Segmental	Kinesin-like protein kca2	GO:1902410 GO:0000913 GO:0009941 GO:0005871 GO:0005694 GO:0007018 GO:0008569 GO:0009504 GO:0005886 GO:0005874 GO:0009524 GO:0008017 GO:0009904 GO:0005524 GO:0009903 GO:0005819 GO:0005829 GO:0031022	Adenosinetriphosphatase;Minus-end-directed_kinesin_ATPase;Nucleoside-triphosphate_phosphatase	Z
evm.model.Ug_unitig_0.1547	645	Segmental	transcription factor bHLH30-like	GO:0046983	NULL	O
evm.model.Ug_unitig_0.1549	261	Dispersed	Homeobox-leucine zipper protein ATHB-6-like	GO:0003700 GO:0009738 GO:0042803 GO:0030308 GO:0045893 GO:0048510 GO:0043565 GO:0009637	NULL	K
evm.model.Ug_unitig_0.155	635	Segmental	B3 domain-containing transcription factor ABI3-like	GO:0009793 GO:0000989 GO:0000988 GO:0009657 GO:0009733 GO:0006357 GO:0003677 GO:0003700 GO:0001076 GO:0009737 GO:0045893 GO:0005829 GO:0031930	NULL	K
evm.model.Ug_unitig_0.1553	280	Dispersed	14-3-3-like protein 16r	GO:0019904	NULL	O
evm.model.Ug_unitig_0.1557	752	Dispersed	Oxidative stress-related Abc1-like protein	GO:0015434 GO:0055072 GO:1901031 GO:0010150 GO:0009941 GO:0009644 GO:0046686 GO:0042542 GO:0046467 GO:0007623 GO:1990641 GO:0070574 GO:0016021 GO:0034599 GO:0016310 GO:0016301 GO:0016787	ABC-type_Cd(2+)_transporter	S
evm.model.Ug_unitig_0.1559	167	Dispersed	Holocarboxylase synthetase	noGO	NULL	S
evm.model.Ug_unitig_0.1560	705	Segmental	Pentatricopeptide repeat-containing protein, chloroplastic	GO:0090305 GO:0009507 GO:0008270 GO:0003723 GO:0005515 GO:0009451 GO:0004519 GO:0031425	NULL	S
evm.model.Ug_unitig_0.1570	160	Singleton	Uncharacterized protein	noGO	NULL	S
evm.model.Ug_unitig_0.1573	373	Dispersed	Pectinesterase	GO:0005737 GO:0005618 GO:0016829 GO:0030599 GO:0045330 GO:0042545 GO:0045490	Pectinesterase;Carboxylesterase	G
evm.model.Ug_unitig_0.1574	574	Segmental	scarecrow-like protein 8	GO:0003700 GO:0005737 GO:0006355 GO:0043565	NULL	K
evm.model.Ug_unitig_0.1575	484	Dispersed	probable polygalacturonase	GO:0016020 GO:0004650 GO:0005975	Polygalacturonase	G
evm.model.Ug_unitig_0.1581	288	Segmental	protein REVEILLE 6-like isoform X1	GO:0009739 GO:0003677 GO:0003700 GO:0009737 GO:0009651 GO:0009753 GO:0006355 GO:0046686 GO:0009751 GO:0042752 GO:0009723	NULL	K
evm.model.Ug_unitig_0.1583	342	Dispersed	Hexosyltransferase	GO:0005802 GO:0010405 GO:0016021 GO:1990714 GO:0000139 GO:0018258	NULL	G
evm.model.Ug_unitig_0.1593	272	Segmental	Transcription factor SPEECHLESS	GO:0009628 GO:0003700 GO:0045893 GO:0046983	NULL	K
evm.model.Ug_unitig_0.1598	237	Segmental	Transcription factor, TCP	GO:0009507 GO:0003700 GO:0045962 GO:0030154 GO:0006355 GO:0043565 GO:0031347 GO:0009965	NULL	K
evm.model.Ug_unitig_0.1599	459	Dispersed	Ras GTPase-activating protein-binding protein 2-like	GO:0016579 GO:1990861 GO:0010494 GO:0034517 GO:0060628 GO:1905538 GO:0003729	NULL	A
evm.model.Ug_unitig_0.16	461	Dispersed	rhodanese-like domain-containing protein 8, chloroplastic isoform X1	GO:0016021	NULL	S
evm.model.Ug_unitig_0.160	388	Singleton	probable plastid-lipid-associated protein 12, chloroplastic	GO:0009941 GO:0009535	NULL	S
evm.model.Ug_unitig_0.1600	190	Singleton	U3 small nucleolar ribonucleoprotein IMP3	GO:0032040 GO:0030515 GO:0034457 GO:0006364 GO:0019843 GO:0005840	NULL	A
evm.model.Ug_unitig_0.1601	463	Segmental	Hexosyltransferase	GO:0052325 GO:0047262 GO:0009860 GO:0016021 GO:0009555 GO:0000139 GO:0090406	Polygalacturonate_4-alpha-galacturonosyltransferase	G
evm.model.Ug_unitig_0.1604	420	Segmental	Phosphatidate cytidylyltransferase	GO:0005789 GO:0004605 GO:0016021 GO:0016024 GO:0006655 GO:0098827	Phosphatidate_cytidylyltransferase	I
evm.model.Ug_unitig_0.1605	298	Segmental	NAC domain-containing protein 92-like	GO:1902074 GO:0042803 GO:0009651 GO:0090400 GO:0043068 GO:0009611 GO:1900057 GO:0043565 GO:0042542 GO:0051091 GO:0009723 GO:0048527 GO:0009733 GO:0003700 GO:0009737 GO:0016020 GO:0010029 GO:1904250	NULL	K
evm.model.Ug_unitig_0.1606	632	Dispersed	pentatricopeptide repeat-containing protein At5g39680-like	GO:0090305 GO:0003723 GO:0009451 GO:0004519 GO:0043231 GO:0005515 GO:0008270	NULL	S
evm.model.Ug_unitig_0.1607	292	Dispersed	probable calcium-binding protein CML45	GO:0005509 GO:0016020	NULL	T
evm.model.Ug_unitig_0.1612	274	Segmental	zinc-finger homeodomain protein 9-like	GO:0009739 GO:0042803 GO:0019760 GO:0016020 GO:0044212 GO:0043565	NULL	K
evm.model.Ug_unitig_0.1613	499	Dispersed	60S ribosomal protein L34, putative	noGO	NULL	S
evm.model.Ug_unitig_0.1616	97	Segmental	Transcription factor PRE5	GO:0009826 GO:0003700 GO:0048510 GO:0006355 GO:0046983 GO:0009741	NULL	K
evm.model.Ug_unitig_0.1617	152	Segmental	ubiquitin-conjugating enzyme E2 2	GO:0005524 GO:0016874 GO:0061631 GO:0000209 GO:0006281 GO:0043161	NULL	O
evm.model.Ug_unitig_0.1619	286	Dispersed	Inositol hexakisphosphate and diphosphoinositol-pentakisphosphate kinase	GO:0005829 GO:0000829 GO:0000832 GO:0005524 GO:0033857 GO:0052723 GO:0052724 GO:0102092 GO:0016310	Diphosphoinositol-pentakisphosphate_kinase;Inositol-hexakisphosphate_kinase	S
evm.model.Ug_unitig_0.162	590	Dispersed	DEAD-box ATP-dependent RNA helicase 41	GO:0003676 GO:0005524 GO:0003724 GO:0070035 GO:0005737 GO:0008186 GO:0010501 GO:0016021 GO:0005730	Adenosinetriphosphatase;RNA_helicase;Nucleoside-triphosphate_phosphatase	A
evm.model.Ug_unitig_0.1622	255	Segmental	Uncharacterized protein	noGO	NULL	E
evm.model.Ug_unitig_0.1631	720	Dispersed	pentatricopeptide repeat-containing protein At1g02060, chloroplastic-like	GO:0000166 GO:0003678 GO:0006338 GO:0006296 GO:0070035 GO:0006293 GO:0032508 GO:0006294 GO:0005829 GO:0070911 GO:0005886 GO:0005654 GO:0005515 GO:0016740	Adenosinetriphosphatase;DNA_helicase;Nucleoside-triphosphate_phosphatase	K
evm.model.Ug_unitig_0.1632	343	Dispersed	Manganese superoxide dismutase	GO:0005515 GO:0046872 GO:0019430 GO:0016020 GO:0009534 GO:0009411 GO:0055114 GO:0004784 GO:0042644	Superoxide_dismutase	P
evm.model.Ug_unitig_0.1641	92	Singleton	hypothetical protein	noGO	NULL	S
evm.model.Ug_unitig_0.1660	378	Dispersed	Trehalose 6-phosphate phosphatase	GO:0009507 GO:2000032 GO:0004805 GO:0005618 GO:0005829 GO:0005992 GO:0046686 GO:0005576 GO:0005730 GO:0016311 GO:0005886	Trehalose-phosphatase	G
evm.model.Ug_unitig_0.1661	173	Tandem	lipoxygenase homology domain-containing protein 1-like	GO:0009409 GO:0009651 GO:0005774 GO:0005886 GO:0009414 GO:0009535 GO:0005515	NULL	S
evm.model.Ug_unitig_0.1662	176	Tandem	lipoxygenase homology domain-containing protein 1-like	GO:0016020 GO:0043231 GO:0044444 GO:0005515 GO:0050896	NULL	S
evm.model.Ug_unitig_0.1663	187	Tandem	PLAT/LH2 domain containing protein	GO:0009409 GO:0009651 GO:0005774 GO:0005886 GO:0009414 GO:0009535 GO:0004096 GO:0005515 GO:0020037 GO:0055114	Peroxidase;Catalase	S
evm.model.Ug_unitig_0.1665	197	Segmental	Putative wall-associated receptor kinase, galacturonan-binding domain-containing protein	noGO	NULL	S
evm.model.Ug_unitig_0.167	1139	Dispersed	Putative proline--tRNA ligase-like	GO:0046373 GO:0046556	Non-reducing_end_alpha-L-arabinofuranosidase	S
evm.model.Ug_unitig_0.1672	521	Dispersed	Phospho-2-dehydro-3-deoxyheptonate aldolase	GO:0009073 GO:0009507 GO:0003849 GO:0009611 GO:0016829 GO:0009423	3-deoxy-7-phosphoheptulonate_synthase	E
evm.model.Ug_unitig_0.1676	269	Segmental	Homeobox-leucine zipper protein ATHB-6-like	GO:0003700 GO:0009738 GO:0042803 GO:0030308 GO:0045893 GO:0048510 GO:0043565 GO:0009637	NULL	K
evm.model.Ug_unitig_0.1679	474	Dispersed	ENTH/VHS family protein isoform 1	noGO	NULL	A
evm.model.Ug_unitig_0.168	163	Singleton	Putative ureidoglycolate hydrolases-like	GO:0004848	Acting_on_carbon-nitrogen_bonds,_other_than_peptide_bonds	none
evm.model.Ug_unitig_0.1680	540	Singleton	Putative ovule protein	GO:0016021	NULL	none
evm.model.Ug_unitig_0.1681	118	Segmental	Membrane-anchored ubiquitin-fold protein	GO:0005886 GO:0005515	NULL	S
evm.model.Ug_unitig_0.1682	166	Segmental	Pollen-specific protein-like	GO:0016021	NULL	S
evm.model.Ug_unitig_0.1683	411	Segmental	Kelch repeat-containing protein	GO:0043161 GO:0005802 GO:0031625 GO:0009061 GO:0030162 GO:0016021 GO:0019005	NULL	S
evm.model.Ug_unitig_0.1687	440	Segmental	Vacuolar cation/proton exchanger	GO:0070588 GO:0016021 GO:0015369 GO:0006874	NULL	P
evm.model.Ug_unitig_0.1689	204	Segmental	mitochondrial import receptor subunit TOM20-like	GO:0071806 GO:0005744 GO:0005515 GO:0045040 GO:0046872 GO:0015450 GO:0016021 GO:0008565 GO:0005774 GO:0005742	Mitochondrial_protein-transporting_ATPase;Chloroplast_protein-transporting_ATPase	U
evm.model.Ug_unitig_0.169	400	Segmental	Protein TONNEAU 1a-like	GO:0030865 GO:0009574 GO:1902410 GO:0000913 GO:0030981 GO:0000226 GO:0005886 GO:0005515	NULL	S
evm.model.Ug_unitig_0.1690	180	Dispersed	50S ribosomal protein L27, chloroplastic	GO:0009570 GO:0003735 GO:0009941 GO:0005840 GO:0009735 GO:0006412 GO:0009579	NULL	J
evm.model.Ug_unitig_0.1692	123	Segmental	Nuclear transport factor 2	GO:0044613 GO:0006913	NULL	U
evm.model.Ug_unitig_0.1694	140	Segmental	Putative ovule protein	GO:0016021	NULL	S
evm.model.Ug_unitig_0.17	185	Singleton	HNH endonuclease	GO:0003676 GO:0004519 GO:0090305	NULL	S
evm.model.Ug_unitig_0.1701	100	Segmental	Uncharacterized protein	noGO	NULL	none
evm.model.Ug_unitig_0.1702	283	Dispersed	ABC transporter I family member 11, chloroplastic	GO:0016887 GO:0005524 GO:0015709 GO:0016020 GO:1902358 GO:0009941 GO:0015419 GO:0102025	Adenosinetriphosphatase;Acting_on_acid_anhydrides;ABC-type_sulfate_transporter;Nucleoside-triphosphate_phosphatase	Q
evm.model.Ug_unitig_0.1703	293	Dispersed	Transcription factor TCP20	GO:0003700 GO:0000987 GO:0006355 GO:0009653	NULL	K
evm.model.Ug_unitig_0.1705	254	Dispersed	Transcription factor SPATULA like	noGO	NULL	S
evm.model.Ug_unitig_0.1706	247	Singleton	Phosducin-like protein 3	noGO	NULL	T
evm.model.Ug_unitig_0.1707	497	Dispersed	Protoporphyrinogen oxidase	GO:0015995 GO:0009706 GO:0009793 GO:0004729 GO:0055114 GO:0006782 GO:0005743	Protoporphyrinogen_oxidase	H
evm.model.Ug_unitig_0.1708	1067	Segmental	Myosin-H heavy chain like	noGO	NULL	S
evm.model.Ug_unitig_0.1709	297	Dispersed	probable adenylate kinase 7, mitochondrial	GO:0005524 GO:0019205 GO:0006139 GO:0006796	NULL	F
evm.model.Ug_unitig_0.171	318	Segmental	CDP-diacylglycerol--glycerol-3-phosphate 3-phosphatidyltransferase	GO:0046474 GO:0009941 GO:0016021 GO:0010027 GO:0008444 GO:0030145	CDP-diacylglycerol--glycerol-3-phosphate_1-phosphatidyltransferase	I
evm.model.Ug_unitig_0.1712	516	Dispersed	F-box protein	GO:0005515	NULL	S
evm.model.Ug_unitig_0.1718	1292	Singleton	DNA repair protein RAD50	GO:0016887 GO:0035861 GO:0007131 GO:0003691 GO:0043047 GO:0070192 GO:0000014 GO:0000794 GO:0004017 GO:0005524 GO:0051880 GO:0032508 GO:0016233 GO:0016310 GO:0090305 GO:0000724 GO:0007004 GO:0000722 GO:0046940 GO:0000784 GO:0008408 GO:0000790 GO:0046872 GO:0005737 GO:0030870	Nucleoside-phosphate_kinase;Adenylate_kinase;Adenosinetriphosphatase;Nucleoside-triphosphate_phosphatase	L
evm.model.Ug_unitig_0.1719	670	Dispersed	Structural maintenance of chromosomes protein	GO:0016020 GO:0000166	NULL	none
evm.model.Ug_unitig_0.172	1552	Segmental	Nuclear receptor coregulator SMRT/SMRTER	GO:2000191 GO:0016922 GO:0042826 GO:0044212 GO:1903799 GO:0007623 GO:0046329 GO:0000981 GO:0005654 GO:0046966 GO:0001102 GO:0030811 GO:0005876 GO:0072362 GO:0051225 GO:0000790 GO:0001085 GO:0003714 GO:0017053 GO:0051196 GO:0005829 GO:0072368 GO:0019216 GO:2001169	NULL	K
evm.model.Ug_unitig_0.1720	362	Dispersed	Protein emsy-like 3	GO:0050832	NULL	S
evm.model.Ug_unitig_0.1721	612	Dispersed	Serine/threonine receptor-like kinase NFP	GO:0019901 GO:0005524 GO:0016021 GO:0007178 GO:0006468 GO:0005886 GO:0004675	Transferring_phosphorus-containing_groups	T
evm.model.Ug_unitig_0.1725	283	Dispersed	probable protein phosphatase 2C 58	GO:0004722 GO:0006470	Protein-serine/threonine_phosphatase	T
evm.model.Ug_unitig_0.1728	275	Dispersed	Agamous-like MADS-box protein AGL104	GO:0003700 GO:0000977 GO:0046983 GO:0045944	NULL	K
evm.model.Ug_unitig_0.1729	90	Dispersed	Transcription elongation factor 1 homolog	GO:0008023 GO:0000993 GO:0003746 GO:0046872 GO:0006368 GO:0006414 GO:0048096	NULL	K
evm.model.Ug_unitig_0.173	244	Dispersed	general transcription factor IIF subunit 2	GO:0015630 GO:0060261 GO:0006370 GO:0000988 GO:0008543 GO:0042795 GO:0005674 GO:0000398 GO:0032968 GO:0000991 GO:0000990 GO:0097550 GO:0016073 GO:0140110 GO:0031334	NULL	K
evm.model.Ug_unitig_0.1735	222	Singleton	rhodanese-like domain-containing protein 14, chloroplastic	GO:0009941 GO:0016740 GO:0009535	NULL	L
evm.model.Ug_unitig_0.1737	168	Singleton	hypothetical protein	noGO	NULL	S
evm.model.Ug_unitig_0.1740	617	Segmental	probable acyl-activating enzyme 2	GO:0016207	4-coumarate--CoA_ligase	I
evm.model.Ug_unitig_0.1744	212	Dispersed	LIM domain-containing protein	GO:0051015 GO:0051017 GO:0004435 GO:0046872 GO:0016042 GO:0035556	Phospholipase_C;Phosphoinositide_phospholipase_C	TZ
evm.model.Ug_unitig_0.175	792	Dispersed	Cation/H(+) antiporter 24-like	GO:0015299 GO:1902600 GO:0016021 GO:0012505 GO:0006885	NULL	P
evm.model.Ug_unitig_0.1751	232	Singleton	DNA replication complex GINS protein PSF1-like	GO:0000811 GO:0016020 GO:0005488 GO:0006260	NULL	L
evm.model.Ug_unitig_0.1752	559	Dispersed	Putative ATP-dependent Clp-type protease (AAA+ ATPase superfamily)	GO:0005524 GO:0005759 GO:0030163 GO:0006508 GO:0051082 GO:0004176 GO:0006457	Adenosinetriphosphatase;Nucleoside-triphosphate_phosphatase	O
evm.model.Ug_unitig_0.1753	455	Dispersed	Protein PIN-likeS 2	GO:0005789 GO:0010252 GO:0055085 GO:0010329 GO:0016021 GO:0010315 GO:0040009 GO:0010311	NULL	S
evm.model.Ug_unitig_0.1757	720	Dispersed	WEB family protein At5g55860-like	GO:0009904 GO:0009903 GO:0005829 GO:0005886	NULL	S
evm.model.Ug_unitig_0.1759	414	Dispersed	Fasciclin-like arabinogalactan protein 1	GO:0048367 GO:0005618 GO:0046658 GO:0016021	NULL	S
evm.model.Ug_unitig_0.176	285	Segmental	GDSL esterase/lipase	GO:0016020 GO:0016788	NULL	I
evm.model.Ug_unitig_0.1763	454	Dispersed	Wee1-like protein kinase	GO:0007050 GO:0018108 GO:0005524 GO:0000076 GO:0007093 GO:0004715 GO:0004674	Transferring_phosphorus-containing_groups;Transferring_phosphorus-containing_groups;Non-specific_protein-tyrosine_kinase	T
evm.model.Ug_unitig_0.1765	183	Dispersed	Transcriptional regulator SUPERMAN-like	GO:0003676 GO:0050794 GO:0048646	NULL	S
evm.model.Ug_unitig_0.1767	268	Singleton	N-(5-phosphoribosyl)anthranilate isomerase 1, chloroplastic	GO:0009507 GO:0000162 GO:0007275 GO:0009411 GO:0004640	Phosphoribosylanthranilate_isomerase	E
evm.model.Ug_unitig_0.1768	312	Singleton	Mitochondrial PGP phosphatase	GO:0016791	NULL	S
evm.model.Ug_unitig_0.1769	716	Dispersed	ABC transporter G family member 6-like	GO:0005524 GO:0042626 GO:0055085 GO:0043492 GO:0016021 GO:0015716 GO:0085029 GO:0015748 GO:0015405 GO:0015416 GO:0005886	Adenosinetriphosphatase;ABC-type_phosphonate_transporter;Nucleoside-triphosphate_phosphatase	Q
evm.model.Ug_unitig_0.177	124	Segmental	6,7-dimethyl-8-ribityllumazine synthase	noGO	NULL	S
evm.model.Ug_unitig_0.1770	361	Singleton	ATP synthase protein I	GO:0009535 GO:0016021	NULL	S
evm.model.Ug_unitig_0.1771	353	Segmental	Polygalacturonase	GO:0005975 GO:0005618 GO:0009830 GO:0004650 GO:0010227 GO:0005576 GO:0009901 GO:0010047	Polygalacturonase	G
evm.model.Ug_unitig_0.1780	237	Dispersed	Plant cysteine oxidase 4	GO:0047800 GO:0055114	Acting_on_single_donors_with_incorporation_of_molecular_oxygen_(oxygenases)._The_oxygen_incorporated_need_not_be_derived_from_O(2);Cysteamine_dioxygenase	S
evm.model.Ug_unitig_0.1782	426	Dispersed	IRK-interacting protein-like	GO:0009639 GO:0009959	NULL	S
evm.model.Ug_unitig_0.1784	236	Singleton	Putative ovule protein	GO:0019185 GO:0043565 GO:0042795 GO:0042796	NULL	S
evm.model.Ug_unitig_0.1787	343	Segmental	Protein CUP-SHAPED COTYLEDON 2	GO:0003677 GO:0003700 GO:0048366 GO:0010072 GO:0090709 GO:0006355 GO:0090691 GO:0010223	NULL	K
evm.model.Ug_unitig_0.1790	382	Segmental	CBS domain-containing protein CBSX5-like	GO:0016301 GO:0016310	NULL	C
evm.model.Ug_unitig_0.1793	68	Singleton	BnaA06g01810D protein	noGO	NULL	none
evm.model.Ug_unitig_0.1794	128	Segmental	Uncharacterized protein	GO:0016020	NULL	none
evm.model.Ug_unitig_0.1795	132	Singleton	Putative ovule protein	noGO	NULL	S
evm.model.Ug_unitig_0.1797	263	Singleton	Protein SPOROCYTELESS like	GO:0003700	NULL	none
evm.model.Ug_unitig_0.1798	179	Segmental	Putative serine protease 45-like	GO:0016021 GO:0008233 GO:0006508	NULL	S
evm.model.Ug_unitig_0.1799	222	Dispersed	Agamous-like MADS-box protein AGL80	GO:0000987 GO:0046983 GO:0045944 GO:0000981	NULL	K
evm.model.Ug_unitig_0.18	248	Singleton	Tetratricopeptide repeat (TPR)-containing protein	GO:0008022 GO:0051087 GO:0016020 GO:0006457 GO:0030544	NULL	S
evm.model.Ug_unitig_0.1805	743	Dispersed	probable beta-D-xylosidase 7	GO:0045493 GO:0009044 GO:0016020 GO:0046556 GO:0031222	Non-reducing_end_alpha-L-arabinofuranosidase;Xylan_1,4-beta-xylosidase	G
evm.model.Ug_unitig_0.1806	336	Dispersed	Transcription factor TGA7	GO:0005516 GO:0003700 GO:0006355 GO:0043565 GO:0009862 GO:0042742	NULL	K
evm.model.Ug_unitig_0.1807	107	Singleton	Methyl-coenzyme M reductase II subunit gamma like	noGO	NULL	S
evm.model.Ug_unitig_0.181	1269	Dispersed	HEAT/U-box domain-containing protein, putative isoform 2	GO:0005829 GO:1990112 GO:0046872 GO:0061630 GO:0016567 GO:1990116	NULL	O
evm.model.Ug_unitig_0.1812	554	Dispersed	Mitochondrial GTPase	GO:0005525 GO:0005515 GO:0003924 GO:0016021 GO:0005829 GO:0002098 GO:0030488	Nucleoside-triphosphate_phosphatase	J
evm.model.Ug_unitig_0.1813	468	Singleton	GPCR-type G protein 1	GO:0005789 GO:0009737 GO:0010427 GO:0051020 GO:0016021 GO:0070417 GO:0005886 GO:0098827	NULL	T
evm.model.Ug_unitig_0.1815	339	Dispersed	Dehydrogenase/reductase SDR family member 12	GO:0016021 GO:0052650 GO:0042572 GO:0055114	NADP-retinol_dehydrogenase;Alcohol_dehydrogenase_(NADP(+))	Q
evm.model.Ug_unitig_0.1818	166	Singleton	Outer envelope pore protein 21A	GO:0015698 GO:0008308 GO:0015288 GO:0098656 GO:0031359 GO:0034426 GO:0044070	NULL	S
evm.model.Ug_unitig_0.1819	152	Dispersed	Putative localized to the inner membrane of the chloroplast-like	GO:0009535 GO:0009706 GO:0016021	NULL	none
evm.model.Ug_unitig_0.182	426	Segmental	Non-specific serine/threonine protein kinase	GO:0005524 GO:0016020 GO:0009268 GO:0004674 GO:0018105 GO:0035556 GO:0018107 GO:0005622	Transferring_phosphorus-containing_groups	T
evm.model.Ug_unitig_0.1820	810	Dispersed	RING-type E3 ubiquitin transferase	GO:0090359 GO:0004842 GO:0016746 GO:0005737 GO:0010150 GO:0010271 GO:0010380 GO:0070696 GO:0005886 GO:0016874 GO:0016567	NULL	S
evm.model.Ug_unitig_0.1821	539	Singleton	Mannosyltransferase	GO:0005789 GO:0006506 GO:0000030 GO:0097502 GO:0016021 GO:0098827	NULL	G
evm.model.Ug_unitig_0.1825	367	Dispersed	Homoserine kinase	GO:0009086 GO:0009570 GO:0004413 GO:0005524 GO:0009617 GO:0009088 GO:0009620 GO:0016310 GO:0009092	Homoserine_kinase	E
evm.model.Ug_unitig_0.1826	208	Dispersed	FACT complex subunit like	noGO	NULL	none
evm.model.Ug_unitig_0.1827	338	Singleton	Cytomatrix protein-like protein	noGO	NULL	none
evm.model.Ug_unitig_0.1829	345	Segmental	DNA ligase 1-like	noGO	NULL	none
evm.model.Ug_unitig_0.1830	133	Dispersed	protein FD-like	GO:0003700 GO:0006355	NULL	none
evm.model.Ug_unitig_0.1832	461	Segmental	la-related protein 1C-like	noGO	NULL	JO
evm.model.Ug_unitig_0.1833	541	Dispersed	pentatricopeptide repeat-containing protein At1g20300, mitochondrial-like	GO:0090305 GO:0003723 GO:0009451 GO:0004519 GO:0004672 GO:0005509 GO:0005515 GO:0005524 GO:0006468	NULL	S
evm.model.Ug_unitig_0.1834	515	Dispersed	serine/threonine-protein kinase STY46-like isoform X2	GO:0005524 GO:0004712 GO:0016020 GO:0006468	Dual-specificity_kinase	T
evm.model.Ug_unitig_0.1836	185	Dispersed	U11/U12 small nuclear ribonucleoprotein 25 kDa protein	GO:0005689 GO:0005515 GO:0000398	NULL	S
evm.model.Ug_unitig_0.1837	410	Dispersed	Alpha-amylase	GO:0005987 GO:0004556 GO:0005509 GO:0103025 GO:0005576 GO:0005983	Alpha-amylase	G
evm.model.Ug_unitig_0.184	246	Segmental	CDK-activating kinase assembly factor MAT1	GO:0005675 GO:0061575 GO:0006289 GO:0045737	NULL	O
evm.model.Ug_unitig_0.1841	379	Dispersed	Putative inactive purple acid phosphatase 29	GO:0016311 GO:0003993	Acid_phosphatase	S
evm.model.Ug_unitig_0.1843	298	Segmental	Uncharacterized protein	noGO	NULL	S
evm.model.Ug_unitig_0.1848	416	Segmental	trihelix transcription factor GT-2-like	GO:0003700 GO:0006355 GO:0003677	NULL	K
evm.model.Ug_unitig_0.1850	500	Dispersed	target of Myb protein 1-like	GO:0005737 GO:0006886	NULL	U
evm.model.Ug_unitig_0.1852	240	Segmental	Chemoreceptor A	noGO	NULL	none
evm.model.Ug_unitig_0.1853	530	Dispersed	PHD finger protein	GO:0016740	NULL	O
evm.model.Ug_unitig_0.1855	267	Singleton	Glutathione S-transferase TCHQD	GO:0005515 GO:0005737 GO:0006749 GO:0004364 GO:0005886	Glutathione_transferase	O
evm.model.Ug_unitig_0.1856	1685	Segmental	Histone-lysine N-methyltransferase	GO:0042800 GO:0010363 GO:0008270 GO:0031062 GO:0009555 GO:0009553 GO:0040029 GO:0009910 GO:0005515 GO:0048653 GO:0048481 GO:0010452 GO:0016116 GO:0051568 GO:0010223	Histone-lysine_N-methyltransferase	U
evm.model.Ug_unitig_0.1859	201	Segmental	Adenine nucleotide alpha hydrolases-like superfamily protein	noGO	NULL	S
evm.model.Ug_unitig_0.186	462	Dispersed	B3 domain-containing protein	GO:0003677 GO:0043231	NULL	K
evm.model.Ug_unitig_0.1861	430	Proximal	radial spoke head 10 homolog B-like	GO:0016021 GO:0016308 GO:0046854	1-phosphatidylinositol-4-phosphate_5-kinase	S
evm.model.Ug_unitig_0.1862	811	Segmental	Serine/threonine-protein kinase mph1	GO:0005524 GO:0005813 GO:0004712 GO:0022402 GO:0000778 GO:0006468	Dual-specificity_kinase	T
evm.model.Ug_unitig_0.1863	142	Segmental	Photosystem I reaction center subunit VI, chloroplastic	GO:0015979 GO:0009538 GO:0009735 GO:0009535	NULL	S
evm.model.Ug_unitig_0.1865	777	Proximal	Phosphatidylinositol 4-phosphate 5-kinase	GO:0051015 GO:0003006 GO:0005524 GO:0009958 GO:0016308 GO:0046854 GO:0005886 GO:0003785 GO:0010311	1-phosphatidylinositol-4-phosphate_5-kinase	T
evm.model.Ug_unitig_0.1867	1320	Segmental	Histone-lysine n-methyltransferase atx1	GO:0010093 GO:0009909 GO:0005737 GO:0018024 GO:0044212 GO:0010314 GO:0006355 GO:0000785 GO:0005886 GO:0051568	Histone-lysine_N-methyltransferase	S
evm.model.Ug_unitig_0.1868	587	Segmental	p-loop containing nucleoside triphosphate hydrolases superfamily protein isoform 1	GO:0042803 GO:0008144 GO:0043097 GO:0009165 GO:0043101 GO:0005829 GO:0006220 GO:0009157 GO:0016310 GO:0004137 GO:0016787	Deoxynucleoside_kinase;Deoxycytidine_kinase	F
evm.model.Ug_unitig_0.1869	94	Segmental	TonB-dependent heme receptor A like	GO:0016021	NULL	none
evm.model.Ug_unitig_0.1870	440	Dispersed	Protein disulfide isomerase-like 5-2	GO:0009506 GO:0003756 GO:0016021 GO:0045454 GO:0006457 GO:0005774 GO:0034976	Protein_disulfide-isomerase	O
evm.model.Ug_unitig_0.1871	435	Dispersed	Receptor-like proteiny region, transmembrane domain-and RING domain-containing protein 2	GO:0000306 GO:0061630 GO:0006511	NULL	O
evm.model.Ug_unitig_0.1872	1140	Dispersed	ATPase family AAA domain-containing protein	GO:0016887 GO:0005524 GO:0042393 GO:0031936 GO:0080111 GO:0003682 GO:0045944	Adenosinetriphosphatase;Nucleoside-triphosphate_phosphatase	O
evm.model.Ug_unitig_0.1873	481	Dispersed	Protein SENSITIVE TO PROTON RHIZOTOXICITY 1	GO:0010044 GO:0003700 GO:0045893 GO:0043620 GO:0010447 GO:0003676	NULL	S
evm.model.Ug_unitig_0.1874	309	Segmental	rhomboid-like protein 19	GO:0006890 GO:0016021	NULL	S
evm.model.Ug_unitig_0.1877	364	Dispersed	transcription factor GTE6-like	GO:0010030 GO:0045893 GO:0005515 GO:0016740	NULL	K
evm.model.Ug_unitig_0.1879	799	Segmental	shewanella-like protein phosphatase 1	GO:0005777 GO:0009507 GO:0003700 GO:0016791 GO:0006355 GO:0030145 GO:0043565 GO:0016311	NULL	T
evm.model.Ug_unitig_0.188	221	Singleton	Uncharacterized protein	noGO	NULL	S
evm.model.Ug_unitig_0.1880	90	Segmental	Uncharacterized protein	GO:0016020	NULL	S
evm.model.Ug_unitig_0.1882	273	Segmental	Eukaryotic translation initiation factor 2 subunit beta	GO:0005886 GO:0003743 GO:0006413 GO:0045454	NULL	J
evm.model.Ug_unitig_0.1884	415	Segmental	26S protease regulatory subunit 6B-like protein	GO:0005524 GO:0009506 GO:0005618 GO:0016020 GO:0031597 GO:0031595 GO:0008233 GO:0017025 GO:1901800 GO:0030433 GO:0036402 GO:0045899	Adenosinetriphosphatase;Nucleoside-triphosphate_phosphatase	O
evm.model.Ug_unitig_0.1888	464	Dispersed	Pentatricopeptide repeat-containing protein, mitochondrial	GO:0005515	NULL	S
evm.model.Ug_unitig_0.1895	383	Dispersed	haloalkane dehalogenase-like	GO:0016746 GO:0009507 GO:0018786	Haloalkane_dehalogenase	S
evm.model.Ug_unitig_0.1896	232	Segmental	THO complex subunit 4A	GO:0003723	NULL	A
evm.model.Ug_unitig_0.1897	416	Segmental	ACT domain-containing protein ACR9-like	GO:0000786 GO:0016021 GO:0003677 GO:0008773 GO:0046982	[Protein-PII]_uridylyltransferase	S
evm.model.Ug_unitig_0.1898	468	Singleton	SNARE-complex protein Syntaxin-18, N-terminal	GO:0006888 GO:0003735 GO:0006890 GO:0016021 GO:0031201 GO:0005840 GO:0006412	NULL	U
evm.model.Ug_unitig_0.1899	312	Segmental	probable sugar phosphate/phosphate translocator At3g11320	GO:0016021 GO:0015165 GO:0015297 GO:0090481	NULL	EG
evm.model.Ug_unitig_0.19	1243	Dispersed	Retinol dehydrogenase 11	GO:0005789 GO:0004745 GO:0052650 GO:0003779 GO:0042572 GO:0042574 GO:0055114 GO:0016630 GO:0098827	All-trans-retinol_dehydrogenase_(NAD(+));NADP-retinol_dehydrogenase;Protochlorophyllide_reductase;Alcohol_dehydrogenase_(NADP(+))	Q
evm.model.Ug_unitig_0.190	228	Dispersed	Transmembrane protein	noGO	NULL	none
evm.model.Ug_unitig_0.1900	377	Dispersed	Glucan endo-1,3-beta-glucosidase	GO:0005975 GO:0004553 GO:0001871 GO:0046658 GO:0030247	NULL	G
evm.model.Ug_unitig_0.1901	232	Singleton	Putative ovule protein	noGO	NULL	none
evm.model.Ug_unitig_0.1905	597	Dispersed	Phosphoinositide phospholipase C	GO:0004435 GO:0048015 GO:0032959 GO:0016042 GO:0048437 GO:0009553 GO:0051209 GO:0010601 GO:0042742 GO:0005886	Phospholipase_C;Phosphoinositide_phospholipase_C	I
evm.model.Ug_unitig_0.1906	281	Dispersed	CTD nuclear envelope phosphatase 1 homolog isoform X1	GO:0004721 GO:0006470 GO:0016021	Protein-serine/threonine_phosphatase	K
evm.model.Ug_unitig_0.1907	565	Segmental	zinc finger CCCH domain-containing protein 29-like	GO:0009409 GO:0003700 GO:0006355 GO:0050832 GO:0010200 GO:0005515 GO:0046872	NULL	S
evm.model.Ug_unitig_0.1908	422	Dispersed	Protein ESKIMO 1	GO:0045492 GO:0009651 GO:0045893 GO:0016021 GO:1990538 GO:0050826 GO:0000139 GO:0009414	NULL	S
evm.model.Ug_unitig_0.1909	167	Dispersed	Early nodulin-like protein 1	GO:0031224 GO:0009055	NULL	S
evm.model.Ug_unitig_0.191	219	Segmental	Ubiquitin-conjugating enzyme E2-17 kDa	GO:0005524 GO:0061631 GO:0016567	NULL	O
evm.model.Ug_unitig_0.1912	487	Segmental	Uroporphyrinogen decarboxylase	GO:0015995 GO:0009570 GO:0004853 GO:0009941 GO:0005829 GO:0006782 GO:0009735	Uroporphyrinogen_decarboxylase	H
evm.model.Ug_unitig_0.1914	214	Dispersed	Glutathione peroxidase	GO:0009570 GO:0009941 GO:0080167 GO:0009535 GO:0004602 GO:0006979 GO:0055114 GO:0098869	Glutathione_peroxidase;Peroxidase	O
evm.model.Ug_unitig_0.1919	592	Dispersed	Pentatricopeptide repeat-containing protein (Fragment)	GO:0090305 GO:0003723 GO:0009451 GO:0004519 GO:0043231 GO:0005515	NULL	S
evm.model.Ug_unitig_0.1921	316	Segmental	putative UDP-sugar transporter DDB_G0278631	GO:0015786 GO:0005459 GO:0072334 GO:0015297 GO:0005460 GO:0008643 GO:0016021 GO:0080147 GO:0048527	NULL	GOU
evm.model.Ug_unitig_0.1925	543	Segmental	aspartate--tRNA ligase 2, cytoplasmic-like	GO:0005524 GO:0003723 GO:0004815 GO:0005829 GO:0017101 GO:0046686 GO:0050832 GO:0006422	Aspartate--tRNA_ligase	J
evm.model.Ug_unitig_0.1926	648	Singleton	Protein arginine N-methyltransferase	GO:0010220 GO:0009909 GO:0019918 GO:0005829 GO:0006355 GO:0043985 GO:0008469	Transferring_one-carbon_groups	D
evm.model.Ug_unitig_0.1929	448	Proximal	Putative glycosyltransferase	GO:0005524 GO:0017176 GO:0016021 GO:0004674 GO:0006468	Transferring_phosphorus-containing_groups;Phosphatidylinositol_N-acetylglucosaminyltransferase	M
evm.model.Ug_unitig_0.193	360	Segmental	KH domain-containing protein	GO:0003723 GO:0016740	NULL	A
evm.model.Ug_unitig_0.1931	492	Proximal	Putative glycosyltransferase	GO:0016757 GO:0016020	NULL	M
evm.model.Ug_unitig_0.1932	522	Dispersed	Pectin acetylesterase	GO:0009506 GO:0052793 GO:0016021 GO:0005829 GO:0071555 GO:0005576 GO:0005886	Carboxylesterase	M
evm.model.Ug_unitig_0.1933	1049	Dispersed	neutral alpha-glucosidase C	GO:0005975 GO:0004553 GO:0030246	NULL	G
evm.model.Ug_unitig_0.1938	513	Singleton	Histidinol dehydrogenase, chloroplastic	GO:0009570 GO:0008270 GO:0051287 GO:0009555 GO:0009411 GO:0055114 GO:0000105 GO:0004399	Histidinol_dehydrogenase	E
evm.model.Ug_unitig_0.1939	357	Singleton	Photosystem II reaction center PsbP family protein	GO:0009654 GO:0019898 GO:0005509 GO:0015979	NULL	J
evm.model.Ug_unitig_0.1940	583	Dispersed	Anaphase-promoting complex subunit 8	GO:0031347 GO:0005680 GO:0005515 GO:0016740 GO:0030071 GO:0051301	NULL	DO
evm.model.Ug_unitig_0.1941	379	Segmental	Proteasome component (PCI) domain-containing protein	GO:0005198 GO:0005829 GO:0008541 GO:0043248 GO:0006511	NULL	O
evm.model.Ug_unitig_0.1942	263	Singleton	50S ribosomal protein	GO:0005840 GO:0003735 GO:0006412	NULL	S
evm.model.Ug_unitig_0.1943	1134	Segmental	protein TPR2-like isoform X2	GO:0042803 GO:0045892 GO:0010229 GO:0010072 GO:0005829 GO:0009867 GO:0009733	NULL	S
evm.model.Ug_unitig_0.1947	599	Dispersed	Putative methyltransferase pmt7	GO:0005802 GO:0052730 GO:0016021 GO:0052729 GO:0032259	Dimethylglycine_N-methyltransferase;Glycine/sarcosine/dimethylglycine_N-methyltransferase;Glycine/sarcosine_N-methyltransferase;Sarcosine/dimethylglycine_N-methyltransferase	S
evm.model.Ug_unitig_0.1950	1274	Singleton	Protein HASTY 1	GO:0003723 GO:0005737 GO:0016020 GO:0140104 GO:0061716 GO:0042565 GO:0009944 GO:0046825 GO:0009965 GO:0009910 GO:0005049	NULL	UY
evm.model.Ug_unitig_0.1951	1559	Dispersed	Sec7_N domain-containing protein	noGO	NULL	S
evm.model.Ug_unitig_0.1952	1720	Segmental	1-phosphatidylinositol-3-phosphate 5-kinase	GO:0005524 GO:0000285 GO:0046872 GO:0007033 GO:0070772 GO:0090332 GO:0009555 GO:0046854 GO:0010008 GO:0032266 GO:0042147 GO:0010256	1-phosphatidylinositol-3-phosphate_5-kinase	T
evm.model.Ug_unitig_0.1953	266	Singleton	psbP domain-containing protein 1, chloroplastic	GO:0009570 GO:0016491 GO:0048564 GO:0005509 GO:0009654 GO:0009543 GO:0055114 GO:0019898 GO:0009535	NULL	S
evm.model.Ug_unitig_0.1954	451	Singleton	Cell wall protein	GO:0012505 GO:0016020 GO:0043227 GO:0043229 GO:0044444 GO:0020037	NULL	S
evm.model.Ug_unitig_0.1955	230	Singleton	Protein-L-isoaspartate O-methyltransferase	GO:0030091 GO:0009737 GO:0009651 GO:0004719 GO:0005829 GO:0006479 GO:0007568 GO:0009845	Protein-L-isoaspartate(D-aspartate)_O-methyltransferase	O
evm.model.Ug_unitig_0.1956	203	Segmental	Peptidyl-tRNA hydrolase 2, mitochondrial	GO:0005829 GO:0016021 GO:0004045	Aminoacyl-tRNA_hydrolase;Carboxylesterase	S
evm.model.Ug_unitig_0.1959	478	Dispersed	Putative unusual protein kinase	GO:0016021 GO:0004672 GO:0005524 GO:0015434 GO:0016787 GO:0006468 GO:0070574	ABC-type_Cd(2+)_transporter	S
evm.model.Ug_unitig_0.196	374	Singleton	Protein effector of transcription 2	GO:0097100 GO:0045892 GO:0005737 GO:2000033 GO:0010089	NULL	S
evm.model.Ug_unitig_0.1961	333	Dispersed	short-chain dehydrogenase TIC 32, chloroplastic-like	GO:0102339 GO:0102340 GO:0102341 GO:0102342 GO:0055114	Very-long-chain_3-oxoacyl-CoA_reductase	Q
evm.model.Ug_unitig_0.1962	263	Dispersed	dof zinc finger protein DOF4.6	GO:0003700 GO:0044212 GO:0006355 GO:0043565	NULL	K
evm.model.Ug_unitig_0.1964	467	Dispersed	plant UBX domain-containing protein 10-like	GO:0005811 GO:0043130 GO:0009941 GO:1905691 GO:0030674 GO:0005886	NULL	T
evm.model.Ug_unitig_0.1965	455	Dispersed	Early nodulin-like protein 1	GO:0046658 GO:0009055	NULL	S
evm.model.Ug_unitig_0.1966	201	Proximal	WUSCHEL-related homeobox 1	GO:0003700 GO:0099402 GO:0005829 GO:0006355 GO:0003677	NULL	K
evm.model.Ug_unitig_0.1968	509	Segmental	Phosphate transporter	GO:0005315 GO:0055085 GO:0006817 GO:0016021	NULL	P
evm.model.Ug_unitig_0.1969	1218	Dispersed	COP1-interacting protein-like protein	noGO	NULL	none
evm.model.Ug_unitig_0.197	204	Segmental	Ribosomal protein L15	GO:0003723 GO:0003735 GO:0002181	NULL	J
evm.model.Ug_unitig_0.1973	106	Segmental	mitochondrial import receptor subunit TOM9-2-like	GO:0005741 GO:0016021 GO:0006886	NULL	U
evm.model.Ug_unitig_0.1974	561	Dispersed	putative pentatricopeptide repeat-containing protein At5g52630	GO:0005515 GO:0008270 GO:0009451	NULL	S
evm.model.Ug_unitig_0.1975	462	Segmental	putative G3BP-like protein	GO:0016579 GO:1990861 GO:0010494 GO:0034517 GO:0060628 GO:1905538 GO:0003729 GO:0005829	NULL	A
evm.model.Ug_unitig_0.1976	177	Segmental	AWPM-19-like protein	GO:0016021	NULL	S
evm.model.Ug_unitig_0.1977	99	Singleton	F-box family protein	GO:0005515	NULL	S
evm.model.Ug_unitig_0.1978	118	Singleton	Putative F-box domain-containing protein	GO:0016874	NULL	none
evm.model.Ug_unitig_0.1979	673	Dispersed	probable serine/threonine-protein kinase abkC	GO:0016021 GO:0015434 GO:0016301 GO:0016787 GO:0016310 GO:0070574	ABC-type_Cd(2+)_transporter	S
evm.model.Ug_unitig_0.198	728	Singleton	tRNA uridine 5-carboxymethylaminomethyl modification enzyme MnmG	GO:0050660 GO:0005829 GO:0002098 GO:0030488	NULL	J
evm.model.Ug_unitig_0.1980	534	Dispersed	diacylglycerol kinase	GO:0043052 GO:0048169 GO:0042048 GO:0000166 GO:0003951 GO:0004143 GO:0007205	NAD(+)_kinase;Diacylglycerol_kinase_(ATP)	IT
evm.model.Ug_unitig_0.1981	792	Dispersed	Protein transport protein SEC23	GO:0005789 GO:0008270 GO:0005096 GO:0005829 GO:0090110 GO:0070971 GO:0000139 GO:0006886 GO:0010584 GO:0030127 GO:0043547	NULL	U
evm.model.Ug_unitig_0.1982	328	Dispersed	transmembrane protein 184C-like	GO:0016021	NULL	T
evm.model.Ug_unitig_0.1983	297	Singleton	Methyltransferase type 11	GO:0016021 GO:0008168 GO:0032259	NULL	S
evm.model.Ug_unitig_0.1984	1165	Singleton	Trafficking protein particle complex II-specific subunit-like protein	GO:0000919 GO:0005802 GO:1902410 GO:1990071 GO:0006891 GO:0034498	NULL	S
evm.model.Ug_unitig_0.1986	872	Dispersed	WD repeat-containing protein 44-like	GO:0005802 GO:0048471 GO:0005829 GO:0010008 GO:0017137	NULL	S
evm.model.Ug_unitig_0.1989	141	Segmental	Uncharacterized protein	GO:0016020	NULL	S
evm.model.Ug_unitig_0.199	240	Segmental	transmembrane protein 56-B	GO:0009651 GO:0045454 GO:0050897 GO:0016021	NULL	T
evm.model.Ug_unitig_0.1990	370	Dispersed	Protein RICE SALT SENSITIVE 3	noGO	NULL	S
evm.model.Ug_unitig_0.1992	200	Singleton	Glyoxalase-like domain-containing protein	GO:0009507 GO:0004493	Methylmalonyl-CoA_epimerase	S
evm.model.Ug_unitig_0.1995	554	Dispersed	Sodium/calcium exchanger family protein (Fragment)	GO:0071472 GO:0009506 GO:0055074 GO:0005509 GO:0070588 GO:0016021 GO:0035725 GO:0005774 GO:0005432	NULL	S
evm.model.Ug_unitig_0.1996	825	Segmental	transcription factor GTE4-like	GO:0005515	NULL	K
evm.model.Ug_unitig_0.1999	139	Segmental	multiprotein-bridging factor 1b-like	GO:0003713 GO:0045893 GO:0005737 GO:0003729 GO:0005730 GO:0043565	NULL	K
evm.model.Ug_unitig_0.2	143	Dispersed	Wiskott-Aldrich syndrome protein family member 2	GO:0009535 GO:0016021 GO:0010027 GO:0010196 GO:0045893 GO:0080167 GO:0090391	NULL	S
evm.model.Ug_unitig_0.200	341	Singleton	Oligoribonuclease (3-	GO:0003676 GO:0090503 GO:0000175 GO:0008946 GO:0016020 GO:0016740	Acting_on_ester_bonds;Acting_on_ester_bonds;Oligonucleotidase	L
evm.model.Ug_unitig_0.2001	400	Segmental	Tubby-like F-box protein	GO:0003700 GO:0044212 GO:0035091 GO:0009555 GO:0005829 GO:0006355 GO:0009620 GO:0061512 GO:0005886 GO:0009536	NULL	S
evm.model.Ug_unitig_0.2002	492	Singleton	Folate gamma-glutamyl hydrolase	GO:0005615 GO:0005618 GO:0006508 GO:0016021 GO:0034722 GO:0046900	Folate_gamma-glutamyl_hydrolase;Acting_on_peptide_bonds_(peptidases)	H
evm.model.Ug_unitig_0.2004	325	Singleton	Coiled-coil domain-containing protein 94	noGO	NULL	S
evm.model.Ug_unitig_0.2006	371	Segmental	Peroxisomal (S)-2-hydroxy-acid oxidase	GO:0009570 GO:0010181 GO:0008891 GO:0042742 GO:0009735 GO:0052852 GO:0052853 GO:0005777 GO:0009506 GO:0016020 GO:0055114 GO:0052854 GO:0050665	(S)-2-hydroxy-acid_oxidase	C
evm.model.Ug_unitig_0.2007	191	Singleton	Lachrymatory-factor synthase (Fragment)	noGO	NULL	S
evm.model.Ug_unitig_0.2008	820	Dispersed	Microtubule binding protein YTM1 (Contains WD40 repeats)	GO:0005524 GO:0000281 GO:0016905 GO:0045159 GO:0046777 GO:0031037 GO:0018107	Transferring_phosphorus-containing_groups;Calcium/calmodulin-dependent_protein_kinase;[Myosin_heavy-chain]_kinase	S
evm.model.Ug_unitig_0.201	515	Singleton	Uncharacterized protein	noGO	NULL	none
evm.model.Ug_unitig_0.2011	305	Dispersed	E3 ubiquitin-protein ligase SINAT5-like	GO:0008270 GO:0061630 GO:0005515 GO:0007275 GO:0005737 GO:0080148 GO:0016874 GO:0016567 GO:0006511	NULL	O
evm.model.Ug_unitig_0.2012	419	Dispersed	protein ROOT PRIMORDIUM DEFECTIVE 1	GO:0009987	NULL	S
evm.model.Ug_unitig_0.2013	192	Singleton	NADPH:quinone oxidoreductase-like	GO:0052873 GO:0010181 GO:0003955 GO:0016021 GO:0005829 GO:0055114	FMN_reductase_(NADPH);FMN_reductase_(NAD(P)H);NAD(P)H_dehydrogenase_(quinone)	S
evm.model.Ug_unitig_0.2014	1624	Dispersed	E3 ubiquitin-protein ligase keg	GO:0045324 GO:0048589 GO:0004674 GO:0006952 GO:0006468 GO:0043621 GO:0009788 GO:0005524 GO:0004842 GO:0005769 GO:0005802 GO:0046872 GO:0016197 GO:0032940 GO:0016874 GO:0016567	Transferring_phosphorus-containing_groups	OT
evm.model.Ug_unitig_0.2015	190	Dispersed	Peptidyl-prolyl cis-trans isomerase	GO:0016018 GO:0065003 GO:0016607 GO:0005681 GO:0051082 GO:0000413 GO:0042026 GO:0005886 GO:0000398 GO:0003755 GO:0071001 GO:0043021 GO:0046540 GO:0005829 GO:0045070	Peptidylprolyl_isomerase	O
evm.model.Ug_unitig_0.2021	610	Dispersed	Protein arginine N-methyltransferase	GO:0035242 GO:0034969 GO:0019919 GO:0005829 GO:0006355 GO:0008469	Transferring_one-carbon_groups	KOT
evm.model.Ug_unitig_0.2022	588	Dispersed	CSC1-like protein RXW8	GO:0016020	NULL	S
evm.model.Ug_unitig_0.2023	302	Singleton	ER membrane protein complex subunit 2	GO:0072546 GO:0005515 GO:0016740 GO:0034975	NULL	S
evm.model.Ug_unitig_0.2025	481	Dispersed	FAD/NAD(P)-binding domain containing protein	noGO	NULL	S
evm.model.Ug_unitig_0.2026	338	Segmental	protein WVD2-like 1	noGO	NULL	S
evm.model.Ug_unitig_0.2027	267	Dispersed	inactive protein RESTRICTED TEV MOVEMENT 2-like	GO:0046741 GO:0009615 GO:0005886	NULL	O
evm.model.Ug_unitig_0.2029	508	Dispersed	Cytochrome p450 98a2	GO:0016711 GO:0042802 GO:0046409 GO:0009813 GO:0005886 GO:0020037 GO:0009805 GO:0005506 GO:0009809 GO:0016021 GO:0055114	Acting_on_paired_donors,_with_incorporation_or_reduction_of_molecular_oxygen._The_oxygen_incorporated_need_not_be_derived_from_O(2);Acting_on_paired_donors,_with_incorporation_or_reduction_of_molecular_oxygen._The_oxygen_incorporated_need_not_be_derived_from_O(2)	Q
evm.model.Ug_unitig_0.203	905	Segmental	Formin-like protein	GO:0051015 GO:0051016 GO:0045010 GO:0005618 GO:0005886 GO:0016021	NULL	TZ
evm.model.Ug_unitig_0.2030	836	Dispersed	Lipoxygenase	GO:0016702 GO:0005515 GO:0005737 GO:0046872 GO:0031408 GO:0055114	Acting_on_single_donors_with_incorporation_of_molecular_oxygen_(oxygenases)._The_oxygen_incorporated_need_not_be_derived_from_O(2)	E
evm.model.Ug_unitig_0.2031	458	Segmental	protein HGV2-like	GO:0008283 GO:0000790 GO:0042393 GO:0006260 GO:0000082 GO:0032991 GO:0006259 GO:0034080 GO:0044877 GO:0006335 GO:0005654	NULL	BD
evm.model.Ug_unitig_0.2032	243	Dispersed	Putative ribosomal protein L25/Gln-tRNA synthetase, anti-codon-binding domain-like	GO:0003729 GO:0003735 GO:0004812 GO:0008097 GO:0006412	NULL	J
evm.model.Ug_unitig_0.2033	1830	Dispersed	DNA polymerase	GO:0000166 GO:0003677 GO:0003887 GO:0009411 GO:0016035 GO:0051536 GO:0019985	DNA-directed_DNA_polymerase	L
evm.model.Ug_unitig_0.2034	689	Dispersed	pentatricopeptide repeat-containing protein At4g14850	GO:0090305 GO:0008270 GO:0005515 GO:0034046 GO:0019287 GO:0009451 GO:0004519 GO:0050790 GO:0019288 GO:0016125	NULL	S
evm.model.Ug_unitig_0.2036	423	Dispersed	Tafazzin family protein	GO:0007507 GO:0031966 GO:0008374 GO:0035965 GO:0007007 GO:0031224	NULL	I
evm.model.Ug_unitig_0.2038	376	Dispersed	Major facilitator superfamily protein	GO:0009624 GO:0016020 GO:0022857 GO:0055085	NULL	E
evm.model.Ug_unitig_0.2039	399	Segmental	RING-H2 finger protein	noGO	NULL	O
evm.model.Ug_unitig_0.204	436	Dispersed	Acyl-coenzyme A thioesterase 9, mitochondrial-like	GO:0005777 GO:0016290 GO:0016853 GO:0102991	Acyl-CoA_hydrolase;Palmitoyl-CoA_hydrolase	I
evm.model.Ug_unitig_0.2041	1274	Segmental	Pectinesterase	GO:0045490 GO:0043086 GO:0045330 GO:0016020 GO:0046910 GO:0042545 GO:0030599 GO:0071944	Pectinesterase;Carboxylesterase	G
evm.model.Ug_unitig_0.2042	269	Singleton	N-terminal acetyltransferase A, auxiliary subunit	GO:0009507 GO:0016021 GO:0005515 GO:0016740	NULL	none
evm.model.Ug_unitig_0.2043	960	Dispersed	Phospholipase	GO:0019375 GO:0009395 GO:0035091 GO:0060627 GO:0048017 GO:0070290 GO:0004630 GO:0016036 GO:0006654 GO:0009733 GO:0006995	Phospholipase_D	I
evm.model.Ug_unitig_0.2044	658	Dispersed	Putative 3-5 exonuclease	GO:0003676 GO:0090305 GO:0008408 GO:0016070	NULL	L
evm.model.Ug_unitig_0.2046	277	Dispersed	histone H1-I-like	GO:0003677 GO:0000786 GO:0006334	NULL	B
evm.model.Ug_unitig_0.2047	501	Segmental	Mitogen-activated protein kinase	GO:0003677 GO:0005524 GO:0005737 GO:1900064 GO:0010468 GO:0004707 GO:0046777 GO:0000786 GO:0006334	Transferring_phosphorus-containing_groups;Mitogen-activated_protein_kinase	H
evm.model.Ug_unitig_0.2048	147	Segmental	Uncharacterized protein	noGO	NULL	S
evm.model.Ug_unitig_0.205	591	Segmental	FRIGIDA-like protein	GO:0030154	NULL	J
evm.model.Ug_unitig_0.2050	395	Singleton	Nicotinate-nucleotide pyrophosphorylase [carboxylating]	GO:0009507 GO:0004514 GO:0009435 GO:0019674 GO:0034213 GO:0055114 GO:0004365	Glyceraldehyde-3-phosphate_dehydrogenase_(NAD(P)(+))_(phosphorylating);Glyceraldehyde-3-phosphate_dehydrogenase_(phosphorylating);Nicotinate-nucleotide_diphosphorylase_(carboxylating)	F
evm.model.Ug_unitig_0.2051	1630	Segmental	putative 1-phosphatidylinositol-3-phosphate 5-kinase FAB1C	GO:0005524 GO:0000285 GO:0070772 GO:0090332 GO:0046854 GO:0010008 GO:0032266 GO:0042147	1-phosphatidylinositol-3-phosphate_5-kinase	T
evm.model.Ug_unitig_0.2052	214	Segmental	Plastid movement impaired 2	noGO	NULL	S
evm.model.Ug_unitig_0.2054	222	Singleton	Repressor of RNA polymerase III transcription	GO:0005737 GO:0000994 GO:0001030 GO:0001031 GO:0001032 GO:0016480	NULL	K
evm.model.Ug_unitig_0.2055	486	Segmental	Protein DETOXIFICATION	GO:0042910 GO:0006855 GO:0009507 GO:0015297 GO:0016021	NULL	V
evm.model.Ug_unitig_0.2058	430	Segmental	uncharacterized PKHD-type hydroxylase At1g22950-like	GO:0031418 GO:0005506 GO:0055114 GO:0008475	Acting_on_paired_donors,_with_incorporation_or_reduction_of_molecular_oxygen._The_oxygen_incorporated_need_not_be_derived_from_O(2);Procollagen-lysine_5-dioxygenase	O
evm.model.Ug_unitig_0.2059	519	Singleton	GWT1 protein	GO:0006506 GO:0016021 GO:0032216 GO:0072659	NULL	S
evm.model.Ug_unitig_0.206	811	Segmental	FTSH protease 10	GO:0009535 GO:0051301 GO:0005524 GO:0008270 GO:0042407 GO:0008053 GO:0016021 GO:0034982 GO:0004222 GO:0005743	Acting_on_peptide_bonds_(peptidases)	O
evm.model.Ug_unitig_0.2060	659	Segmental	putative mediator of RNA polymerase II transcription subunit 8	GO:0005515	NULL	S
evm.model.Ug_unitig_0.2061	316	Segmental	Haloacid dehalogenase-like hydrolase	GO:0033883 GO:0016311	Pyridoxal_phosphatase	S
evm.model.Ug_unitig_0.2062	705	Segmental	Serine/threonine protein kinase	GO:0009570 GO:0005524 GO:0005515 GO:0032440 GO:0016021 GO:0046777 GO:0055114 GO:0004674 GO:0005886 GO:0090406	Transferring_phosphorus-containing_groups;2-alkenal_reductase_(NAD(P)(+))	T
evm.model.Ug_unitig_0.2063	1100	Dispersed	Kinesin-like protein	GO:0016887 GO:0005524 GO:0003777 GO:0009506 GO:0035371 GO:0005871 GO:0007018 GO:0005886 GO:0008017	Adenosinetriphosphatase;Nucleoside-triphosphate_phosphatase	Z
evm.model.Ug_unitig_0.2064	323	Dispersed	transcription factor bHLH121-like	GO:0003700 GO:0006355 GO:0043565 GO:0046983	NULL	K
evm.model.Ug_unitig_0.2066	336	Segmental	X intrinsic protein	GO:0005887 GO:0006833 GO:0034220 GO:0015250 GO:0009414	NULL	P
evm.model.Ug_unitig_0.2069	1952	Segmental	E3 ubiquitin-protein ligase upl3	GO:0061630 GO:0005515 GO:0005737 GO:0042023 GO:0006259 GO:0005886 GO:0016874 GO:0016567	NULL	O
evm.model.Ug_unitig_0.207	374	Singleton	S-acyltransferase	GO:0016409 GO:0043231 GO:0012505 GO:0018345 GO:0044444	NULL	S
evm.model.Ug_unitig_0.2070	264	Dispersed	5-methylthioadenosine/S-adenosylhomocysteine nucleosidase 2	GO:0019509 GO:0009116 GO:0010215 GO:0000003 GO:0031225 GO:0008930	Purine_nucleosidase;Methylthioadenosine_nucleosidase	S
evm.model.Ug_unitig_0.2071	386	Segmental	Urease accessory protein ureH	GO:0016021	NULL	S
evm.model.Ug_unitig_0.2072	1088	Dispersed	probable ubiquitin-conjugating enzyme E2 23	GO:0061630 GO:0031625 GO:0005829 GO:0016567 GO:0061631	NULL	O
evm.model.Ug_unitig_0.2073	479	Segmental	probable protein phosphatase 2C 46	GO:0004724 GO:0046872 GO:0006470 GO:0016021	Protein-serine/threonine_phosphatase	T
evm.model.Ug_unitig_0.2076	899	Dispersed	Mechanosensitive ion channel protein	GO:0008381 GO:0009506 GO:0055085 GO:0016021 GO:0005774 GO:0006820 GO:0005886	NULL	M
evm.model.Ug_unitig_0.2077	616	Segmental	serine/threonine-protein kinase STY46-like	GO:0018108 GO:0005524 GO:0004712 GO:0004715 GO:0016020	Transferring_phosphorus-containing_groups;Dual-specificity_kinase;Non-specific_protein-tyrosine_kinase	T
evm.model.Ug_unitig_0.208	186	Segmental	Putative ovule protein	noGO	NULL	none
evm.model.Ug_unitig_0.2081	546	Segmental	calcium-dependent protein kinase 4	GO:0005524 GO:0005516 GO:0009738 GO:0005737 GO:0005509 GO:0046777 GO:0004683 GO:0018105 GO:0035556 GO:0005886 GO:0009931	Transferring_phosphorus-containing_groups;Calcium/calmodulin-dependent_protein_kinase	T
evm.model.Ug_unitig_0.2082	145	Segmental	Protein downstream neighbor of son like	noGO	NULL	none
evm.model.Ug_unitig_0.2083	697	Segmental	Kinesin-like protein	GO:0016887 GO:0005524 GO:0003777 GO:0005871 GO:0007018 GO:0005874 GO:0008017	Adenosinetriphosphatase;Nucleoside-triphosphate_phosphatase	Z
evm.model.Ug_unitig_0.2085	187	Singleton	uncharacterized GPI-anchored protein At3g06035-like	GO:0031225	NULL	S
evm.model.Ug_unitig_0.2087	335	Tandem	F-box protein PP2-B10-like	GO:0005515	NULL	S
evm.model.Ug_unitig_0.2088	386	Singleton	Mevalonate kinase	GO:0000287 GO:0005524 GO:0019287 GO:0005829 GO:0004496 GO:0016310 GO:0016126	Mevalonate_kinase	I
evm.model.Ug_unitig_0.2089	92	Singleton	Putative ovule protein	GO:0016021	NULL	S
evm.model.Ug_unitig_0.2090	196	Singleton	50s ribosomal protein l24, chloroplastic	GO:0009570 GO:0003735 GO:0009941 GO:0019843 GO:0005840 GO:0032544	NULL	J
evm.model.Ug_unitig_0.2091	873	Segmental	Formin-like protein	GO:0045010 GO:0005618 GO:0048317 GO:0016021 GO:0009960 GO:0009524	NULL	TZ
evm.model.Ug_unitig_0.2092	796	Segmental	Kinesin-like protein	GO:0016887 GO:0005524 GO:0051225 GO:0003777 GO:0005871 GO:0007018 GO:0005874 GO:0008017	Adenosinetriphosphatase;Nucleoside-triphosphate_phosphatase	Z
evm.model.Ug_unitig_0.2093	234	Segmental	transcription factor ILR3	GO:0003700 GO:0019760 GO:0006355 GO:0043565 GO:0046983	NULL	K
evm.model.Ug_unitig_0.2094	534	Dispersed	Hexosyltransferase	GO:0047262 GO:0010417 GO:0045489 GO:0016021 GO:0000139 GO:0071555	Polygalacturonate_4-alpha-galacturonosyltransferase	G
evm.model.Ug_unitig_0.2095	890	Segmental	autophagy-related protein 18f-like	GO:0090316 GO:0090630 GO:0007030 GO:0042594 GO:0051491 GO:0005730 GO:0045944 GO:0016192 GO:0045111 GO:0048487 GO:0010698 GO:0035257 GO:0010595 GO:2000114 GO:0035035 GO:0034260 GO:2000251 GO:0031252 GO:0005881 GO:0003682 GO:0071391 GO:0051895 GO:0042393 GO:0035327 GO:0031023 GO:0035148	NULL	S
evm.model.Ug_unitig_0.2097	360	Singleton	Trafficking protein particle complex subunit	GO:0030008 GO:0006888 GO:0005829 GO:0006891 GO:0017112 GO:0033106	NULL	U
evm.model.Ug_unitig_0.2099	399	Singleton	Putative ovule protein	GO:0016020	NULL	none
evm.model.Ug_unitig_0.21	227	Segmental	CYC-like protein 1 (Fragment)	GO:0003700 GO:2000032 GO:0006355	NULL	K
evm.model.Ug_unitig_0.2100	153	Singleton	Uncharacterized protein	noGO	NULL	none
evm.model.Ug_unitig_0.2102	72	Singleton	Transmembrane protein, putative	GO:0016020	NULL	T
evm.model.Ug_unitig_0.2103	353	Dispersed	Mitogen-activated protein kinase kinase 6	GO:0031098 GO:0007112 GO:0004674 GO:0007346 GO:0009524 GO:0000187 GO:0005524 GO:0002229 GO:0004708 GO:0010200 GO:0051019 GO:0031435 GO:0010311	Transferring_phosphorus-containing_groups;Dual-specificity_kinase	T
evm.model.Ug_unitig_0.2104	784	Segmental	Protein transport protein SEC23	GO:0005789 GO:0008270 GO:0090114 GO:0000139 GO:0006886 GO:0030127	NULL	U
evm.model.Ug_unitig_0.2105	326	Dispersed	Fructokinase-2	GO:0005524 GO:0009506 GO:0019252 GO:0016021 GO:0005829 GO:0006000 GO:0046835 GO:0008865 GO:0005886	Fructokinase;Hexokinase	G
evm.model.Ug_unitig_0.2106	234	Segmental	B-box zinc finger protein	GO:0003677 GO:0008270 GO:0003700 GO:0003712 GO:0000989 GO:0000988 GO:0080167 GO:0006355 GO:0010100	NULL	S
evm.model.Ug_unitig_0.2107	197	Singleton	DNA-directed RNA polymerases II, IV and V subunit 11-like	GO:0003677 GO:0001055 GO:0000419 GO:0000418 GO:0006366 GO:0046983 GO:0005665	DNA-directed_RNA_polymerase	K
evm.model.Ug_unitig_0.2108	427	Segmental	probable transcription factor PosF21	GO:0003700 GO:0005829 GO:0006355	NULL	K
evm.model.Ug_unitig_0.2109	810	Segmental	flowering time control protein FPA-like isoform X2	GO:0003723 GO:0010228 GO:0009553 GO:0009911 GO:0000785 GO:0031048 GO:0006378 GO:0000398	NULL	A
evm.model.Ug_unitig_0.2110	947	Segmental	RNA polymerase sigma-70	GO:0016987 GO:2000142 GO:0000988 GO:0043254 GO:0045721 GO:0080005 GO:0071482 GO:0000990 GO:0071461 GO:0004842 GO:0003700 GO:0009507 GO:0043161 GO:0005515 GO:0005829 GO:0034657 GO:0016567	NULL	K
evm.model.Ug_unitig_0.2111	237	Singleton	UPF0739 protein C1orf74 homolog isoform X2	noGO	NULL	S
evm.model.Ug_unitig_0.2112	630	Singleton	RING finger protein 10	GO:0046872	NULL	O
evm.model.Ug_unitig_0.2113	325	Singleton	Putative ovule protein (Fragment)	GO:0016021	NULL	S
evm.model.Ug_unitig_0.2114	555	Segmental	Aspartokinase	GO:0009570 GO:0004072 GO:0009089 GO:0009088 GO:0046983 GO:0016310 GO:0009090	Aspartate_kinase	E
evm.model.Ug_unitig_0.2115	242	Dispersed	Major intrinsic protein	GO:0005887 GO:0006833 GO:0034220 GO:0015250	NULL	P
evm.model.Ug_unitig_0.2116	732	Dispersed	Chloride channel protein	GO:0055085 GO:0006821 GO:0005247 GO:0009535	NULL	P
evm.model.Ug_unitig_0.2117	261	Dispersed	Aminoacyl tRNA synthase complex-interacting multifunctional protein 1	GO:0009507 GO:0000049 GO:0004812	NULL	J
evm.model.Ug_unitig_0.2118	361	Segmental	Actin-related protein 7	GO:0006325 GO:0009653 GO:0009793 GO:0010227	NULL	Z
evm.model.Ug_unitig_0.2119	582	Singleton	aberrant root formation protein 4 isoform X1	noGO	NULL	S
evm.model.Ug_unitig_0.212	190	Segmental	E3 ubiquitin-protein like	GO:0008270	NULL	A
evm.model.Ug_unitig_0.2120	260	Singleton	probable thiol methyltransferase 2 isoform X1	GO:0018708 GO:0019762 GO:0009941 GO:0006952 GO:0005886 GO:0032259	Thiol_S-methyltransferase	S
evm.model.Ug_unitig_0.2121	827	Dispersed	ribosome biogenesis protein BRX1 homolog	GO:0003723 GO:0005515 GO:0005829 GO:0006364 GO:0000027 GO:0005730	NULL	J
evm.model.Ug_unitig_0.2122	389	Segmental	Glycosyltransferase	GO:0071475 GO:0080043 GO:0043231 GO:0080044 GO:0080024 GO:0071215 GO:0080167 GO:0010016 GO:0052638 GO:0070301 GO:0042631	NULL	CG
evm.model.Ug_unitig_0.2123	270	Tandem	Putative chitinase	GO:0010272 GO:0009627 GO:0010150 GO:0072722 GO:0009620 GO:0009615 GO:0005886 GO:0004568 GO:0008061 GO:0005975 GO:0006032 GO:0016998	Chitinase	S
evm.model.Ug_unitig_0.2128	267	Tandem	Putative chitinase	GO:0010272 GO:0009627 GO:0010150 GO:0072722 GO:0009620 GO:0009615 GO:0005886 GO:0004568 GO:0008061 GO:0005975 GO:0006032 GO:0016998	Chitinase	S
evm.model.Ug_unitig_0.213	165	Singleton	immediate early response 3-interacting protein 1-like	GO:0005789 GO:0030134 GO:0030173 GO:0006888	NULL	S
evm.model.Ug_unitig_0.2130	606	Dispersed	Macpf domain-containing protein	noGO	NULL	S
evm.model.Ug_unitig_0.2131	364	Dispersed	Pheophytinase, chloroplastic	GO:0016787	NULL	S
evm.model.Ug_unitig_0.2132	1072	Dispersed	DNA-binding protein SMUBP-2-like	GO:0009570 GO:0005524 GO:0003677 GO:0070035 GO:0008186 GO:0032508 GO:0043022 GO:0009941 GO:0032574 GO:0000049 GO:0043621 GO:0043139	Adenosinetriphosphatase;DNA_helicase;RNA_helicase;Nucleoside-triphosphate_phosphatase	L
[truncated: 14,531 more rows]

## Sheet: Urenif EXCLUSIVES BASED on Ugibba
gene_name	length	status	product	GOterms	EC_name	NOG_class
[truncated: 14,420 more rows]

[truncated: 5 more sheets: Ugibba EXCLUSIVES BASED on Urenif, Urenif CORE BASED on four genomes, Ugibba CORE BASED on four genomes, Urenif SINGLETONS based on four genomes, Ugibba SINGLETONS based on four genomes]
